# Supplementary material for: Methylation patterns of the nasal epigenome of hospitalized SARS-CoV-2 positive patients reveal insights into molecular mechanisms of COVID-19
Source: Research Square preprint supplement (doi:10.21203/rs.3.rs-5026887/v1), 2024-10-22
Supplement: Supplementary file 1 [file 005208b8bf65de237015d03f.xlsx]

## Sheet: SupplementalTable2B
chr	start	end	pvalue	qvalue	methylation difference	gene
chr1	100133751	100134250	1.08656e-24	2.07567e-21	20.3935	TRMT13
chr1	10028751	10029250	8.54497e-34	7.06571e-30	30.122	UBE4B
chr1	10029001	10029500	3.45604e-22	4.04009e-19	35.8833	UBE4B
chr1	108660501	108661000	4.72687e-32	3.04098e-28	27.1253	HENMT1
chr1	112706001	112706500	7.24879e-20	5.29976e-17	24.5955	RHOC
chr1	113867001	113867500	1.81164e-18	9.60658e-16	24.6155	PTPN22
chr1	116667751	116668250	4.48264e-20	3.43298e-17	17.5851	IGSF3
chr1	11856751	11857250	1.20577e-22	1.54486e-19	17.8148	NPPB
chr1	1232501	1233000	4.84003e-27	1.40419e-23	16.5926	B3GALT6
chr1	1272501	1273000	7.75057e-30	3.62488e-26	11.6324	UBE2J2
chr1	150925501	150926000	4.98434e-20	3.78097e-17	13.4305	SETDB1
chr1	150975251	150975750	2.91258e-23	4.20961e-20	16.1618	CERS2
chr1	151254001	151254500	3.09585e-19	1.96676e-16	11.5032	PSMD4
chr1	153075501	153076000	1.70355e-24	3.14038e-21	42.3875	SPRR2B
chr1	156149501	156150000	2.10704e-19	1.39158e-16	28.9886	SEMA4A
chr1	1599001	1599500	3.87735e-23	5.49123e-20	12.4797	FNDC10
chr1	1724751	1725250	6.75551e-33	4.87024e-29	17.6635	CDK11A
chr1	173870001	173870500	5.69788e-19	3.3933e-16	14.6359	ZBTB37
chr1	176208501	176209000	5.36653e-22	6.02549e-19	22.8502	RFWD2
chr1	179294501	179295000	2.85157e-40	5.16214e-36	11.0437	SOAT1
chr1	18629501	18630000	9.34827e-19	5.30045e-16	15.5453	PAX7
chr1	207645251	207645750	9.82108e-30	4.49076e-26	11.6013	CR1L
chr1	21622001	21622500	5.23985e-26	1.26821e-22	27.7111	RAP1GAP
chr1	2189751	2190250	1.70922e-25	3.7552e-22	29.2836	FAAP20
chr1	2190001	2190500	1.31982e-19	9.10545e-17	23.4992	FAAP20
chr1	220877251	220877750	7.8128e-20	5.66521e-17	10.0324	HLX
chr1	225939501	225940000	3.46922e-22	4.05302e-19	29.574	LEFTY2
chr1	229270751	229271250	7.69931e-35	7.32722e-31	34.8049	RAB4A
chr1	229559251	229559750	7.22747e-27	2.03112e-23	11.0432	ABCB10
chr1	231627501	231628000	1.0441e-25	2.38711e-22	13.7096	DISC1
chr1	247170251	247170750	5.88711e-27	1.68245e-23	12.7558	ZNF124
chr1	247170501	247171000	1.12029e-30	5.89805e-27	18.1484	ZNF124
chr1	248678251	248678750	3.55006e-20	2.77648e-17	14.6643	OR14I1
chr1	248678501	248679000	3.33837e-24	5.8265e-21	21.5438	OR14I1
chr1	248859251	248859750	6.16054e-34	5.24522e-30	10.4758	ZNF692
chr1	248859501	248860000	1.25803e-21	1.31404e-18	14.8139	ZNF692
chr1	25876001	25876500	8.15774e-27	2.26373e-23	27.9536	PAQR7
chr1	25906751	25907250	1.95408e-33	1.50116e-29	17.1423	STMN1
chr1	27011001	27011500	1.01309e-18	5.70697e-16	17.4752	FAM46B
chr1	27383251	27383750	1.2306e-33	9.98851e-30	26.5981	CD164L2
chr1	27634501	27635000	6.2053e-27	1.76635e-23	18.5497	FGR
chr1	32255251	32255750	5.61238e-21	5.12526e-18	15.1419	LCK
chr1	3647001	3647500	2.01995e-20	1.66093e-17	13.2086	WRAP73
chr1	37690751	37691250	2.05581e-64	2.26874e-59	24.3763	C1orf109
chr1	42535251	42535750	3.07193e-23	4.4304e-20	30.9135	CCDC30
chr1	42962501	42963000	1.1121e-42	2.61552e-38	29.8629	SLC2A1
chr1	43969501	43970000	1.99256e-21	1.99346e-18	10.4849	DPH2
chr1	44784501	44785000	1.61276e-25	3.56098e-22	13.0442	BEST4
chr1	50023501	50024000	1.71268e-22	2.12505e-19	12.9256	AGBL4
chr1	62195501	62196000	2.28204e-26	5.83067e-23	10.0695	L1TD1
chr1	6415251	6415750	4.90464e-21	4.53316e-18	14.6043	HES2
chr1	6579251	6579750	9.76105e-20	6.93422e-17	11.0852	ZBTB48
chr1	71046251	71046750	6.29367e-21	5.68947e-18	11.008	PTGER3
chr1	92480251	92480750	3.04946e-28	1.08761e-24	26.3805	GFI1
chr1	92480501	92481000	8.31309e-39	1.27214e-34	27.4945	GFI1
chr1	92480751	92481250	2.51054e-26	6.38606e-23	17.5203	GFI1
chr1	92481001	92481500	6.2654e-25	1.25583e-21	22.0393	GFI1
chr2	108657251	108657750	1.82766e-19	1.22425e-16	16.811	LIMS1
chr2	119432501	119433000	1.06221e-29	4.82629e-26	12.8137	TMEM37
chr2	127422501	127423000	1.41435e-31	8.48103e-28	32.2057	PROC
chr2	127859251	127859750	3.69891e-24	6.40317e-21	22.0563	POLR2D
chr2	127859501	127860000	2.54802e-25	5.44583e-22	14.2129	POLR2D
chr2	177268501	177269000	7.2154e-20	5.28005e-17	12.6747	NFE2L2
chr2	203864001	203864500	4.70536e-26	1.14513e-22	49.0976	CTLA4
chr2	205684751	205685250	1.07217e-25	2.4406e-22	11.8527	NRP2
chr2	207767001	207767500	4.55762e-19	2.77528e-16	27.376	FZD5
chr2	213283501	213284000	1.46945e-19	1.00471e-16	20.0002	SPAG16
chr2	241274251	241274750	7.27917e-19	4.23052e-16	24.1949	HDLBP
chr2	241274501	241275000	3.74764e-23	5.32331e-20	28.3332	HDLBP
chr2	241356751	241357250	1.17858e-20	1.01218e-17	10.3203	FARP2
chr2	27380751	27381250	8.20403e-23	1.08854e-19	16.0647	ZNF513
chr2	27381001	27381500	2.25958e-22	2.74429e-19	13.7138	ZNF513
chr2	28811001	28811500	4.72303e-34	4.08185e-30	20.1925	SPDYA
chr2	46296251	46296750	5.27492e-20	3.97722e-17	10.3566	EPAS1
chr2	64990251	64990750	1.88824e-29	8.24644e-26	10.2747	SLC1A4
chr2	70302001	70302500	1.15344e-60	1.01832e-55	28.0213	FAM136A
chr2	85421001	85421500	1.56781e-20	1.31593e-17	10.1	SH2D6
chr2	86809001	86809500	7.60612e-25	1.49943e-21	17.2703	CD8A
chr2	86809251	86809750	2.32317e-23	3.43158e-20	12.292	CD8A
chr2	9473251	9473750	3.61134e-26	8.9366e-23	22.4629	IAH1
chr2	96144251	96144750	2.32096e-18	1.19775e-15	17.6934	DUSP2
chr2	96867001	96867500	1.35477e-23	2.09893e-20	30.8208	SEMA4C
chr2	99250501	99251000	1.86683e-23	2.8192e-20	25.9752	LYG2
chr3	10164251	10164750	6.24083e-31	3.40433e-27	12.4815	IRAK2
chr3	111542001	111542500	1.82101e-20	1.51231e-17	11.1778	CD96
chr3	128496501	128497000	2.33525e-23	3.44765e-20	23.1732	GATA2
chr3	128496751	128497250	1.90886e-60	1.58756e-55	23.8829	GATA2
chr3	128497001	128497500	4.56071e-45	1.33531e-40	16.8456	GATA2
chr3	14406251	14406750	2.15816e-25	4.66469e-22	19.1683	SLC6A6
chr3	151319001	151319500	4.92674e-21	4.54953e-18	15.4319	GPR87
chr3	156120751	156121250	7.69522e-25	1.51381e-21	25.7068	KCNAB1
chr3	16883751	16884250	2.29221e-19	1.50315e-16	16.6955	PLCL2
chr3	171809001	171809500	1.05703e-25	2.41284e-22	12.609	PLD1
chr3	183254751	183255250	2.02047e-19	1.34042e-16	10.0211	B3GNT5
chr3	183885001	183885500	5.42369e-19	3.2499e-16	13.9704	PARL
chr3	186569501	186570000	5.77397e-20	4.30709e-17	11.3957	TBCCD1
chr3	197030001	197030500	2.05661e-20	1.68769e-17	23.148	MELTF
chr3	197554001	197554500	5.28488e-23	7.26796e-20	12.7763	BDH1
chr3	197957751	197958250	2.4833e-19	1.6159e-16	28.1257	IQCG
chr3	30894001	30894500	1.4383e-23	2.21579e-20	13.968	GADL1
chr3	37988251	37988750	1.25059e-20	1.06954e-17	25.9624	VILL
chr3	37988501	37989000	4.43294e-26	1.0825e-22	28.8882	VILL
chr3	37990251	37990750	3.83095e-21	3.61464e-18	17.5401	VILL
chr3	46717501	46718000	1.68496e-19	1.13729e-16	21.0681	PRSS50
chr3	48239251	48239750	1.81304e-24	3.33257e-21	20.6042	ZNF589
chr3	48610501	48611000	2.29216e-19	1.50315e-16	22.3738	UQCRC1
chr3	49903501	49904000	6.32227e-21	5.71443e-18	11.3046	MST1R
chr3	52244001	52244500	1.99306e-21	1.99361e-18	14.3215	PPM1M
chr3	57757251	57757750	2.62356e-25	5.58646e-22	10.129	SLMAP
chr3	72996251	72996750	1.9484e-32	1.3232e-28	10.3229	PPP4R2
chr3	9749001	9749500	3.52232e-28	1.23931e-24	17.6504	OGG1
chr3	97972501	97973000	1.27471e-26	3.3913e-23	15.1746	RIOX2
chr4	139016501	139017000	2.1653e-27	6.7239e-24	15.109	NOCT
chr4	25376251	25376750	7.09974e-22	7.79014e-19	13.0407	ANAPC4
chr4	2817751	2818250	2.88685e-19	1.84853e-16	15.3079	SH3BP2
chr4	3529751	3530250	1.52202e-21	1.56248e-18	11.9404	LRPAP1
chr4	37889751	37890250	9.52592e-30	4.37322e-26	13.6703	TBC1D1
chr4	37890001	37890500	2.948e-22	3.50256e-19	13.5737	TBC1D1
chr4	6693501	6694000	5.77726e-23	7.8805e-20	18.9911	S100P
chr4	76948251	76948750	1.80949e-38	2.64221e-34	19.8526	2023-09-11
chr4	99562501	99563000	7.39156e-26	1.74844e-22	20.4293	TRMT10A
chr5	103562251	103562750	1.57409e-59	1.22068e-54	16.3365	NUDT12
chr5	103562501	103563000	4.82877e-69	6.44426e-64	21.2408	NUDT12
chr5	1112751	1113250	5.16031e-20	3.89899e-17	15.9263	SLC12A7
chr5	149732251	149732750	2.81979e-24	4.99278e-21	10.5348	PPARGC1B
chr5	170105251	170105750	1.77208e-21	1.79257e-18	29.4093	FOXI1
chr5	170105501	170106000	2.37145e-59	1.8145e-54	28.8408	FOXI1
chr5	170105751	170106250	8.9686e-21	7.88767e-18	13.0869	FOXI1
chr5	177132251	177132750	1.35361e-21	1.40238e-18	26.6086	NSD1
chr5	178007751	178008250	7.25238e-20	5.3017e-17	20.055	FAM153C
chr5	178125751	178126250	1.04873e-23	1.65928e-20	16.1897	RMND5B
chr5	178729501	178730000	3.41228e-20	2.67692e-17	18.0724	ZNF354A
chr5	179345751	179346250	9.4165e-27	2.58429e-23	35.2223	ADAMTS2
chr5	38844501	38845000	4.57011e-22	5.19635e-19	33.1506	OSMR
chr5	38844751	38845250	1.2368e-26	3.3091e-23	21.123	OSMR
chr5	42813001	42813500	4.72743e-19	2.86743e-16	27.0037	SELENOP
chr5	74684751	74685250	7.86643e-23	1.04787e-19	15.1419	HEXB
chr5	79238501	79239000	9.30624e-32	5.72397e-28	25.3671	JMY
chr5	79690001	79690500	2.15703e-37	2.7879e-33	28.1133	CMYA5
chr5	79690251	79690750	1.63944e-18	8.78931e-16	20.919	CMYA5
chr6	10720001	10720500	1.25379e-24	2.37301e-21	15.6079	TMEM14C
chr6	109689751	109690250	7.60055e-26	1.79344e-22	20.6028	AK9
chr6	110873501	110874000	6.78502e-22	7.47483e-19	26.3097	AMD1
chr6	116682001	116682500	3.21554e-28	1.14187e-24	18.2343	KPNA5
chr6	138105501	138106000	1.19304e-21	1.25117e-18	23.5129	PERP
chr6	158535751	158536250	8.85952e-24	1.42372e-20	19.183	TMEM181
chr6	158643501	158644000	8.84896e-22	9.52194e-19	11.7036	DYNLT1
chr6	159761001	159761500	1.49689e-25	3.32175e-22	13.3739	ACAT2
chr6	1605251	1605750	3.76215e-22	4.35798e-19	12.322	FOXC1
chr6	18384251	18384750	2.11611e-25	4.58418e-22	18.9714	RNF144B
chr6	18384501	18385000	4.72896e-23	6.57561e-20	17.1408	RNF144B
chr6	26042501	26043000	3.05889e-91	9.75205e-86	23.4225	HIST1H2BB
chr6	26042751	26043250	6.70025e-113	4.80625e-107	47.4378	HIST1H2BB
chr6	26224751	26225250	1.11816e-19	7.83665e-17	15.1986	HIST1H3E
chr6	26225001	26225500	1.97846e-35	2.02742e-31	22.7109	HIST1H3E
chr6	26225251	26225750	5.4664e-28	1.85728e-24	22.0176	HIST1H3E
chr6	2837251	2837750	9.82589e-22	1.04867e-18	16.1855	SERPINB1
chr6	2837501	2838000	5.18726e-24	8.72948e-21	16.0428	SERPINB1
chr6	30076251	30076750	1.75474e-18	9.3368e-16	30.3575	RNF39
chr6	30890001	30890500	1.96877e-30	9.99296e-27	28.7383	DDR1
chr6	31728501	31729000	2.15986e-21	2.14513e-18	14.9231	DDAH2
chr6	31728751	31729250	3.39252e-27	1.01928e-23	17.072	DDAH2
chr6	3258251	3258750	1.09645e-21	1.15791e-18	15.493	PSMG4
chr6	35454001	35454500	1.88444e-29	8.2361e-26	29.0407	FANCE
chr6	35454251	35454750	1.11001e-19	7.78432e-17	26.9732	FANCE
chr6	36438251	36438750	7.91667e-25	1.55477e-21	22.8906	KCTD20
chr6	36438501	36439000	1.26702e-19	8.78233e-17	22.7914	KCTD20
chr6	3849751	3850250	3.553e-31	1.99698e-27	20.684	FAM50B
chr6	390751	391250	7.2086e-24	1.17922e-20	12.3739	IRF4
chr6	42747751	42748250	8.23684e-34	6.86035e-30	26.7372	TBCC
chr6	43228751	43229250	7.60753e-36	8.25264e-32	20.2825	DNPH1
chr6	44275501	44276000	8.2053e-34	6.84401e-30	22.057	ENSG00000272442
chr6	53347001	53347500	7.26023e-22	7.94498e-19	10.2222	ELOVL5
chr6	81754251	81754750	1.8767e-18	9.92044e-16	14.3404	FAM46A
chr6	83431751	83432250	2.54427e-26	6.469e-23	27.3641	ME1
chr7	100582251	100582750	7.48006e-26	1.76719e-22	20.6238	LRCH4
chr7	101087251	101087750	6.61249e-19	3.88813e-16	10.0948	TRIM56
chr7	1056251	1056750	5.31558e-23	7.30633e-20	20.3771	GPR146
chr7	116498251	116498750	2.39784e-19	1.56419e-16	14.5206	CAV2
chr7	155713001	155713500	3.54084e-19	2.21682e-16	15.9961	SHH
chr7	155713251	155713750	2.34469e-19	1.5336e-16	20.8756	SHH
chr7	155803001	155803500	1.00434e-29	4.57785e-26	10.4283	SHH
chr7	156607501	156608000	1.0321e-27	3.3519e-24	25.5459	SHH
chr7	156641251	156641750	4.73151e-22	5.3671e-19	10.422	SHH , RNF32
chr7	1567251	1567750	3.28349e-32	2.16085e-28	17.4511	PSMG3
chr7	1567501	1568000	2.49153e-62	2.46515e-57	28.2701	PSMG3
chr7	157338501	157339000	3.12265e-35	3.11105e-31	13.5383	DNAJB6
chr7	27106501	27107000	9.00984e-36	9.68235e-32	17.4312	HOXA2
chr7	27143501	27144000	5.49499e-23	7.52949e-20	17.2029	HOXA5
chr7	27663251	27663750	1.78173e-29	7.80504e-26	13.0525	HIBADH
chr7	36389251	36389750	2.42787e-26	6.19224e-23	10.5505	ANLN
chr7	44163001	44163500	2.10574e-23	3.1395e-20	32.627	GCK
chr7	44163251	44163750	3.14917e-21	3.01951e-18	33.6824	GCK
chr7	5781751	5782250	2.09103e-21	2.08217e-18	16.704	RNF216
chr7	6825251	6825750	5.28387e-75	9.78127e-70	47.1636	CCZ1B
chr7	73429001	73429500	2.00519e-30	1.01498e-26	33.6441	FZD9
chr7	73429251	73429750	4.56498e-19	2.77917e-16	28.6146	FZD9
chr7	75914251	75914750	3.14765e-23	4.52935e-20	15.459	POR
chr7	76360001	76360500	1.78457e-18	9.47531e-16	21.1518	YWHAG
chr7	91266001	91266500	5.22433e-20	3.94373e-17	16.5184	FZD1
chr7	91266251	91266750	5.98834e-22	6.66877e-19	15.1396	FZD1
chr7	954751	955250	8.00307e-25	1.57067e-21	38.9472	ADAP1
chr7	95772001	95772500	5.56636e-19	3.32359e-16	27.7035	DYNC1I1
chr7	983001	983500	5.93349e-25	1.19557e-21	30.6526	CYP2W1
chr7	983251	983750	2.63352e-43	6.48612e-39	31.3152	CYP2W1
chr8	101488751	101489250	1.56786e-25	3.46449e-22	55.2645	GRHL2
chr8	101489001	101489500	1.56786e-25	3.46449e-22	55.2645	GRHL2
chr8	103411751	103412250	2.6701e-19	1.72591e-16	20.4183	DCAF13
chr8	106772001	106772500	7.13074e-23	9.54299e-20	18.0043	ABRA
chr8	124728501	124729000	1.20197e-41	2.47226e-37	16.1374	MTSS1
chr8	142613751	142614250	3.64318e-25	7.59416e-22	11.424	ARC
chr8	143269501	143270000	1.97152e-18	1.03815e-15	17.9156	GLI4
chr8	143557001	143557500	2.26881e-21	2.24285e-18	12.9887	GSDMD
chr8	143577501	143578000	8.4107e-19	4.82221e-16	12.7125	NAPRT
chr8	143577751	143578250	8.23696e-42	1.73781e-37	14.7015	NAPRT
chr8	143738501	143739000	2.06979e-22	2.52985e-19	29.3184	FAM83H
chr8	143950501	143951000	3.05664e-41	5.98662e-37	20.4024	PLEC
chr8	144060251	144060750	7.61403e-29	3.00301e-25	55.7636	OPLAH
chr8	144514751	144515250	7.55007e-31	4.06061e-27	16.8453	RECQL4
chr8	144515001	144515500	5.53107e-25	1.11684e-21	15.3962	RECQL4
chr8	144527001	144527500	2.14252e-21	2.12901e-18	24.3518	LRRC24
chr8	144853501	144854000	4.6558e-66	5.34354e-61	20.892	COMMD5
chr8	17160251	17160750	6.33968e-19	3.7398e-16	17.6302	ZDHHC2
chr8	22578001	22578500	5.00332e-21	4.61237e-18	19.0621	PDLIM2
chr8	28491251	28491750	1.05515e-21	1.11779e-18	15.7654	FZD3
chr8	41528501	41529000	4.32509e-24	7.39348e-21	29.287	GINS4
chr8	60518251	60518750	5.18932e-30	2.47955e-26	20.5785	RAB2A
chr8	81721251	81721750	8.5247e-20	6.13721e-17	10.6927	ZFAND1
chr8	8384001	8384500	2.22821e-18	1.15561e-15	18.3397	PRAG1
chr8	8702251	8702750	1.134e-52	5.90929e-48	20.615	CLDN23
chr8	95133251	95133750	9.28968e-21	8.14136e-18	10.0698	PLEKHF2
chr9	111895001	111895500	8.74529e-22	9.42452e-19	22.933	UGCG
chr9	111895251	111895750	2.30549e-29	9.89548e-26	22.3968	UGCG
chr9	120843251	120843750	5.47757e-27	1.57246e-23	22.3552	PSMD5
chr9	120843501	120844000	1.86515e-39	3.06685e-35	21.1757	PSMD5
chr9	122225751	122226250	6.88602e-19	4.0265e-16	31.147	LHX6
chr9	124450001	124450500	3.21125e-19	2.0331e-16	19.5076	ADGRD2
chr9	126326251	126326750	3.73333e-37	4.68797e-33	55.8679	MVB12B
chr9	126916001	126916500	8.66066e-29	3.39249e-25	21.7077	RALGPS1
chr9	127565251	127565750	9.92425e-22	1.05798e-18	14.2399	FAM129B
chr9	127568001	127568500	3.87622e-20	3.00838e-17	21.265	FAM129B
chr9	127938751	127939250	8.17224e-24	1.32343e-20	17.8534	DPM2
chr9	128192501	128193000	5.0998e-21	4.69603e-18	11.3837	CIZ1
chr9	128702001	128702500	2.16886e-22	2.64419e-19	17.0534	PKN3
chr9	130893751	130894250	1.2399e-18	6.86009e-16	16.941	QRFP
chr9	133275751	133276250	2.81577e-33	2.14021e-29	13.4316	ABO
chr9	136099751	136100250	7.37828e-22	8.06186e-19	25.0836	NACC2
chr9	136100001	136100500	1.65485e-21	1.68646e-18	18.2316	NACC2
chr9	136882751	136883250	1.34085e-21	1.39017e-18	28.875	TRAF2
chr9	136994501	136995000	6.44867e-21	5.82134e-18	14.7052	CLIC3
chr9	137030751	137031250	1.50133e-18	8.12402e-16	11.1414	FUT7
chr9	137048501	137049000	1.43692e-21	1.48147e-18	15.3494	NPDC1
chr9	137226751	137227250	3.31307e-25	6.95404e-22	32.1767	RNF224
chr9	27113501	27114000	8.58906e-20	6.17813e-17	58.7963	TEK
chr9	70260001	70260500	4.96245e-25	1.01091e-21	13.5074	SMC5
chr9	74887751	74888250	3.58785e-22	4.1763e-19	13.2134	TRPM6
chr9	74888001	74888500	2.57963e-21	2.52188e-18	24.4263	TRPM6
chr9	88532501	88533000	1.94869e-23	2.93256e-20	11.6612	NXNL2
chr9	92428001	92428500	5.99334e-24	9.96024e-21	28.362	OMD
chr9	92428251	92428750	5.99334e-24	9.96024e-21	28.362	OMD
chr9	98119751	98120250	8.39533e-20	6.05319e-17	17.6048	TRIM14
chr9	98120001	98120500	1.05617e-20	9.14721e-18	17.6856	TRIM14
chr10	102454751	102455250	4.73161e-19	2.86936e-16	25.9451	C10orf95
chr10	104336501	104337000	1.56371e-18	8.43054e-16	21.3828	ITPRIP
chr10	11743001	11743500	1.42197e-22	1.79699e-19	10.6708	ECHDC3
chr10	118594001	118594500	2.53955e-29	1.08353e-25	23.3729	PRLHR
chr10	119654751	119655250	7.82303e-27	2.18034e-23	30.6546	BAG3
chr10	131979751	131980250	2.21677e-23	3.28881e-20	12.3678	BNIP3
chr10	133337001	133337500	3.97218e-22	4.57633e-19	18.8872	CALY
chr10	1733751	1734250	5.85333e-19	3.47829e-16	10.5887	ADARB2
chr10	44383251	44383750	2.59881e-22	3.12586e-19	18.0496	CXCL12
chr10	5499501	5500000	1.10725e-18	6.18758e-16	27.1707	CALML5
chr10	5524751	5525250	2.84108e-21	2.74938e-18	22.8629	CALML3
chr10	6144001	6144500	2.18035e-18	1.13345e-15	18.306	PFKFB3
chr10	70052001	70052500	1.82634e-19	1.22351e-16	11.8407	H2AFY2
chr10	89206251	89206750	2.39259e-21	2.35225e-18	15.7048	CH25H
chr10	92592251	92592750	1.41541e-33	1.12034e-29	17.9714	KIF11
chr10	97318001	97318500	1.17161e-25	2.65014e-22	16.4085	FRAT1
chr10	97318251	97318750	3.33699e-26	8.32229e-23	15.9957	FRAT1
chr11	117987001	117987500	7.33937e-21	6.56958e-18	21.1314	IL10RA
chr11	120137751	120138250	2.8923e-29	1.22222e-25	30.5955	TRIM29
chr11	120208501	120209000	2.29063e-20	1.86242e-17	15.3854	OAF
chr11	124897751	124898250	5.36746e-19	3.21924e-16	13.3653	ROBO4
chr11	133951751	133952250	3.74988e-20	2.91704e-17	16.9743	IGSF9B
chr11	134330751	134331250	3.48995e-19	2.18649e-16	12.3469	GLB1L2
chr11	17082251	17082750	1.03467e-20	8.98404e-18	20.6792	RPS13
chr11	17082501	17083000	2.25203e-27	6.97058e-24	21.0344	RPS13
chr11	1834251	1834750	7.80837e-20	5.66271e-17	30.2232	SYT8
chr11	18455751	18456250	6.06069e-33	4.39694e-29	20.3936	LDHAL6A
chr11	27469251	27469750	1.0161e-19	7.19075e-17	23.1069	LGR4
chr11	320751	321250	4.60666e-28	1.58583e-24	12.9044	IFITM3
chr11	33736751	33737250	3.95197e-26	9.74172e-23	10.1213	CD59
chr11	3641751	3642250	4.68599e-21	4.34847e-18	21.1596	ART5
chr11	394001	394500	1.15094e-46	3.88517e-42	24.0836	PKP3
chr11	394251	394750	1.63959e-81	4.09084e-76	37.4843	PKP3
chr11	46590501	46591000	5.82404e-24	9.69589e-21	30.6809	AMBRA1
chr11	46590751	46591250	1.08715e-20	9.39565e-18	30.1513	AMBRA1
chr11	62671001	62671500	1.14126e-27	3.68554e-24	10.9099	UQCC3
chr11	640001	640500	2.09608e-32	1.41846e-28	21.2325	DRD4
chr11	640251	640750	1.44826e-38	2.1531e-34	20.8251	DRD4
chr11	64166501	64167000	2.02835e-38	2.9468e-34	21.7813	MACROD1
chr11	64339751	64340250	3.14029e-20	2.48152e-17	14.447	CCDC88B
chr11	64341501	64342000	6.70158e-25	1.3358e-21	29.9448	CCDC88B
chr11	64874501	64875000	3.17515e-39	5.01953e-35	22.0775	EHD1
chr11	64971501	64972000	7.37762e-19	4.2821e-16	13.1077	MAJIN
chr11	65525751	65526250	2.57932e-24	4.59108e-21	20.4668	SCYL1
chr11	65872251	65872750	2.28109e-46	7.43762e-42	28.7952	EFEMP2
chr11	67628751	67629250	1.75237e-37	2.28548e-33	15.1683	NUDT8
chr11	68029751	68030250	3.38647e-33	2.53702e-29	20.6255	NDUFS8
chr11	71447251	71447750	2.87489e-20	2.29168e-17	20.348	DHCR7
chr11	71447501	71448000	1.49193e-19	1.0179e-16	11.4511	DHCR7
chr11	94545001	94545500	4.85104e-58	3.43681e-53	24.4467	FUT4
chr11	94545251	94545750	3.03254e-118	2.90041e-112	26.5312	FUT4
chr11	94545501	94546000	3.66786e-57	2.41935e-52	22.8199	FUT4
chr11	9572001	9572500	1.54468e-35	1.60294e-31	18.4185	WEE1
chr11	9572251	9572750	4.21327e-34	3.66337e-30	23.4305	WEE1
chr12	101696501	101697000	1.12228e-19	7.86265e-17	16.841	CHPT1
chr12	121301501	121302000	1.0735e-22	1.38748e-19	32.096	CAMKK2
chr12	121797001	121797500	3.42314e-44	9.22252e-40	17.6282	RHOF
chr12	121915501	121916000	1.01667e-19	7.19389e-17	21.8547	WDR66
chr12	121915751	121916250	1.62628e-20	1.36142e-17	28.7501	WDR66
chr12	122752001	122752500	2.12437e-38	3.07075e-34	13.2455	DENR
chr12	130163751	130164250	1.44133e-26	3.80459e-23	14.1257	FZD10
chr12	130870501	130871000	7.49844e-27	2.097e-23	17.433	RAN
chr12	130870751	130871250	1.59609e-19	1.08126e-16	14.0649	RAN
chr12	25249501	25250000	9.34271e-30	4.30288e-26	21.5959	KRAS
chr12	27471251	27471750	2.66435e-22	3.19198e-19	34.1433	SMCO2
chr12	48943251	48943750	2.52172e-31	1.44711e-27	34.1463	ENSG00000255863
chr12	48943501	48944000	2.49209e-30	1.24357e-26	22.0373	ENSG00000255863
chr12	49296251	49296750	3.46192e-19	2.17239e-16	10.6705	PRPH
chr12	52519751	52520250	4.10524e-35	4.0576e-31	22.9596	KRT5
chr12	52520001	52520500	3.06973e-27	9.2764e-24	15.8912	KRT5
chr12	54369001	54369500	1.33641e-27	4.27052e-24	20.1347	GPR84
chr12	55978001	55978500	1.81893e-28	6.81338e-25	17.2297	RAB5B
chr12	55978251	55978750	2.57052e-22	3.09703e-19	16.9262	RAB5B
chr12	57213001	57213500	3.72133e-23	5.28856e-20	16.8093	NXPH4
chr12	57737251	57737750	3.93463e-30	1.91187e-26	28.9956	AGAP2
chr12	57737751	57738250	3.46713e-19	2.17509e-16	31.9015	AGAP2
chr12	57738001	57738500	7.1969e-21	6.45313e-18	29.0322	AGAP2
chr12	6773501	6774000	4.55498e-21	4.23787e-18	13.3459	LAG3
chr12	6943001	6943500	1.05878e-21	1.12102e-18	12.0356	C12orf57
chr12	7439501	7440000	1.38262e-24	2.58868e-21	18.2303	CD163L1
chr12	7439751	7440250	5.69171e-19	3.39032e-16	14.6899	CD163L1
chr12	75391001	75391500	4.20575e-45	1.23769e-40	10.6989	GLIPR1L2
chr12	75391251	75391750	3.67218e-47	1.30081e-42	13.2135	GLIPR1L2
chr12	75391501	75392000	4.50088e-19	2.74452e-16	18.9544	GLIPR1L2
chr12	75513501	75514000	3.15879e-33	2.37817e-29	38.381	KRR1
chr12	76348751	76349250	1.24097e-21	1.29747e-18	15.6285	BBS10
chr12	99983751	99984250	2.26424e-18	1.17217e-15	10.1495	ANKS1B
chr13	109781501	109782000	6.57498e-34	5.58979e-30	18.0244	IRS2
chr13	109784251	109784750	3.44551e-46	1.09239e-41	31.3324	IRS2
chr13	30906751	30907250	1.11043e-18	6.20474e-16	11.5204	MEDAG
chr13	49215251	49215750	3.28246e-19	2.07293e-16	13.4296	MLNR
chr13	49691751	49692250	3.357e-22	3.93392e-19	10.1729	EBPL
chr13	94707501	94708000	2.10945e-46	6.9173e-42	10.9726	SOX21
chr13	95305501	95306000	2.18607e-20	1.78423e-17	17.5766	ABCC4
chr13	99262001	99262500	4.93118e-21	4.55171e-18	29.7822	GPR18
chr14	100726251	100726750	4.45026e-31	2.46148e-27	13.1073	DLK1
chr14	103103251	103103750	6.25449e-41	1.18065e-36	16.6801	EXOC3L4
chr14	103126751	103127250	1.24313e-41	2.54779e-37	38.7192	TNFAIP2
chr14	103127001	103127500	3.48461e-120	3.99935e-114	44.2048	TNFAIP2
chr14	103127251	103127750	2.6493e-64	2.86853e-59	23.5294	TNFAIP2
chr14	103708751	103709250	2.38524e-19	1.55739e-16	25.5784	XRCC3
chr14	105249001	105249500	8.56811e-21	7.55514e-18	26.7101	BTBD6
chr14	20457001	20457500	2.69081e-26	6.80539e-23	21.6036	APEX1
chr14	21533751	21534250	9.47304e-19	5.36388e-16	23.3866	SALL2
chr14	22840001	22840500	8.33228e-20	6.01377e-17	36.7771	MMP14
chr14	23115501	23116000	4.57809e-20	3.49637e-17	27.0458	CEBPE
chr14	23575751	23576250	4.07822e-38	5.75017e-34	17.2734	JPH4
chr14	24311501	24312000	7.98126e-23	1.06119e-19	19.0491	CIDEB
chr14	45250251	45250750	3.91989e-28	1.36635e-24	19.1396	MIS18BP1
chr14	49597251	49597750	6.79677e-21	6.11825e-18	12.402	LRR1
chr14	52734501	52735000	1.05522e-22	1.36508e-19	13.2648	STYX
chr14	76762501	76763000	4.9354e-21	4.55488e-18	11.6025	VASH1
chr14	77024001	77024500	5.48307e-22	6.14312e-19	16.8651	IRF2BPL
chr14	77099001	77099500	9.13336e-20	6.53686e-17	14.5399	ENSG00000259164
chr14	95477751	95478250	3.13634e-26	7.85603e-23	21.2279	SYNE3
chr14	95713751	95714250	5.87409e-23	8.01069e-20	12.9281	TCL1A
chr15	40763001	40763500	5.68978e-30	2.70516e-26	13.601	GCHFR
chr15	40768501	40769000	3.85511e-20	2.99444e-17	15.3134	C15orf62
chr15	41827001	41827500	2.40176e-56	1.46624e-51	25.8805	JMJD7
chr15	44664501	44665000	2.30845e-31	1.33138e-27	12.9495	SPG11
chr15	44664751	44665250	1.22e-33	9.91655e-30	14.6297	SPG11
chr15	48962501	48963000	7.42333e-20	5.40945e-17	20.2385	SHC4
chr15	55408751	55409250	2.65782e-22	3.18549e-19	15.2895	CCPG1
chr15	57592501	57593000	1.02972e-18	5.79329e-16	13.3865	GCOM1
chr15	60399001	60399500	6.21761e-25	1.24756e-21	16.5889	ANXA2
chr15	64823501	64824000	6.01547e-31	3.28765e-27	30.4377	PIF1
chr15	73877751	73878250	3.53391e-22	4.11769e-19	24.824	TBC1D21
chr15	73878001	73878500	1.62166e-18	8.70943e-16	13.7757	TBC1D21
chr15	75348751	75349250	5.85846e-22	6.53182e-19	18.6966	NEIL1
chr15	75349001	75349500	9.79401e-31	5.19443e-27	17.3388	NEIL1
chr15	81002251	81002750	1.71447e-25	3.76527e-22	26.6331	TLNRD1
chr15	90885251	90885750	1.37859e-23	2.13066e-20	18.0886	FES
chr15	90957001	90957500	4.94933e-74	8.60672e-69	57.3464	RCCD1
chr15	90957251	90957750	1.1045e-43	2.84226e-39	35.7711	RCCD1
chr15	93071501	93072000	1.99756e-20	1.64394e-17	11.3927	RGMA
chr16	11916251	11916750	5.31679e-22	5.97315e-19	13.0977	GSPT1
chr16	11916501	11917000	3.16402e-26	7.91845e-23	17.5209	GSPT1
chr16	14070501	14071000	2.07588e-24	3.77221e-21	19.687	MKL2
chr16	1488251	1488750	4.07697e-19	2.51354e-16	18.7531	PTX4
chr16	16224001	16224500	4.07394e-25	8.42895e-22	28.9703	ABCC6
chr16	1680001	1680500	2.09445e-19	1.38406e-16	16.5063	JPT2
chr16	19520251	19520750	1.18134e-30	6.19105e-27	14.8408	GDE1
chr16	21159501	21160000	5.22737e-21	4.80271e-18	10.2204	DNAH3
chr16	23453251	23453750	3.55614e-24	6.16906e-21	10.9142	COG7
chr16	2519751	2520250	1.59503e-26	4.18528e-23	24.3437	AMDHD2
chr16	2539751	2540250	8.47007e-34	7.02012e-30	13.1243	PDPK1
chr16	2715501	2716000	8.89294e-27	2.45115e-23	14.198	PRSS27
chr16	28367751	28368250	3.00607e-27	9.10322e-24	34.8798	NPIPB6
chr16	2985001	2985500	2.57353e-20	2.07247e-17	16.8519	PKMYT1
chr16	3035001	3035500	3.21484e-19	2.03492e-16	22.7333	BICDL2
chr16	30379251	30379750	2.19366e-22	2.67215e-19	22.5495	2023-09-01
chr16	30474001	30474500	3.28521e-19	2.07398e-16	16.598	ITGAL
chr16	30528001	30528500	1.20015e-21	1.25724e-18	10.5634	ZNF768
chr16	30894251	30894750	2.06398e-40	3.7601e-36	14.2236	BCL7C
chr16	31423751	31424250	3.9593e-19	2.4481e-16	20.5535	COX6A2
chr16	3207251	3207750	7.03598e-22	7.72905e-19	11.2604	OR1F1
chr16	3235501	3236000	2.77553e-23	4.02722e-20	38.131	ZNF200
chr16	3499751	3500250	2.66904e-34	2.38575e-30	10.4385	CLUAP1
chr16	3610251	3610750	7.64044e-21	6.81251e-18	14.6879	SLX4
chr16	3646501	3647000	9.87008e-19	5.5699e-16	19.8841	DNASE1
chr16	4769251	4769750	6.54211e-36	7.16459e-32	26.1244	ZNF500
chr16	4935251	4935750	5.05147e-23	6.98707e-20	33.4488	PPL
chr16	4935501	4936000	4.81656e-24	8.15587e-21	33.7019	PPL
chr16	4958251	4958750	2.60629e-19	1.68751e-16	12.4424	SEC14L5
chr16	50685501	50686000	1.27217e-28	4.89636e-25	20.2592	SNX20
chr16	57623251	57623750	2.20195e-21	2.1839e-18	22.3235	ADGRG1
chr16	592001	592500	2.07939e-21	2.07274e-18	23.7413	RAB40C
chr16	592251	592750	5.52959e-20	4.1438e-17	26.4899	RAB40C
chr16	67105251	67105750	1.8594e-19	1.24435e-16	27.3438	C16orf70
chr16	67110751	67111250	2.77354e-19	1.78453e-16	15.2401	C16orf70
chr16	67199001	67199500	2.22742e-22	2.7081e-19	23.3382	ELMO3
chr16	68238001	68238500	7.59117e-27	2.1219e-23	12.0754	ESRP2
chr16	785751	786250	1.27809e-24	2.41185e-21	24.7364	RPUSD1
chr16	789001	789500	1.36699e-20	1.16164e-17	20.9486	CHTF18
chr16	79251	79750	1.17771e-25	2.65974e-22	18.5212	MPG
chr16	84041001	84041500	1.48359e-18	8.0424e-16	17.7533	SLC38A8
chr16	84194751	84195250	9.14777e-32	5.63254e-28	18.7733	ADAD2
chr16	85115501	85116000	3.36923e-23	4.82954e-20	40.9793	FAM92B
chr16	87491001	87491500	3.36439e-24	5.87013e-21	21.1741	ZCCHC14
chr16	88430001	88430500	1.87946e-31	1.10507e-27	18.3332	ZNF469
chr16	88856001	88856500	1.93316e-27	6.04227e-24	26.7704	GALNS
chr16	88856251	88856750	9.56506e-35	9.01312e-31	26.5216	GALNS
chr16	982501	983000	2.15402e-28	7.95433e-25	26.3948	SOX8
chr17	16216001	16216500	4.3305e-19	2.65105e-16	11.2366	NCOR1
chr17	17205501	17206000	5.32456e-24	8.94742e-21	12.828	PLD6
chr17	1725001	1725500	3.26306e-28	1.15589e-24	10.9736	WDR81
chr17	1761751	1762250	2.38167e-21	2.34272e-18	33.4421	SERPINF1
chr17	182001	182500	8.99607e-34	7.4067e-30	15.8843	DOC2B
chr17	182251	182750	1.55561e-25	3.44273e-22	29.1658	DOC2B
chr17	19650251	19650750	1.69329e-31	9.99702e-28	16.2209	ALDH3A2
chr17	19650501	19651000	1.16035e-30	6.08665e-27	18.9874	ALDH3A2
chr17	19746501	19747000	2.25022e-23	3.33154e-20	14.5821	ALDH3A1
chr17	19748501	19749000	1.34069e-22	1.70403e-19	19.9275	ALDH3A1
chr17	21283501	21284000	1.15867e-18	6.45044e-16	10.2004	MAP2K3
chr17	2300001	2300500	3.68041e-23	5.23688e-20	15.9	SRR
chr17	28709251	28709750	5.60763e-20	4.19626e-17	10.1902	PROCA1
chr17	28716751	28717250	9.24428e-19	5.24564e-16	19.6004	RAB34
chr17	31390751	31391250	5.13667e-23	7.0944e-20	35.9703	RAB11FIP4
chr17	36199001	36199500	8.80631e-19	5.02594e-16	21.8757	CCL3L3
chr17	36548501	36549000	8.42128e-20	6.06961e-17	25.4575	GGNBP2
chr17	3802251	3802750	6.39296e-22	7.09055e-19	23.3283	ITGAE
chr17	3960501	3961000	2.03155e-27	6.33255e-24	20.622	ATP2A3
chr17	3960751	3961250	4.60702e-19	2.8018e-16	14.2136	ATP2A3
chr17	39867751	39868250	1.08289e-22	1.3974e-19	14.2067	ZPBP2
chr17	40019251	40019750	1.49863e-18	8.11243e-16	24.3338	CSF3
chr17	40363501	40364000	6.82381e-27	1.92617e-23	19.0316	GJD3
chr17	41346251	41346750	3.8748e-27	1.14796e-23	25.3079	KRT33A
chr17	41624501	41625000	1.34083e-19	9.23264e-17	20.7624	KRT17
chr17	42040251	42040750	6.19198e-23	8.39829e-20	10.5802	ZNF385C
chr17	43129501	43130000	4.51004e-20	3.45037e-17	19.1396	BRCA1
chr17	43399751	43400250	2.35836e-39	3.78035e-35	26.5268	ARL4D
chr17	43400001	43400500	1.263e-37	1.67774e-33	34.1198	ARL4D
chr17	4497251	4497750	7.43232e-23	9.92807e-20	21.43	SPNS2
chr17	47842751	47843250	1.06384e-18	5.96649e-16	28.5793	SCRN2
chr17	47843001	47843500	3.04737e-22	3.60495e-19	38.4428	SCRN2
chr17	48550501	48551000	3.40106e-22	3.97905e-19	25.4455	HOXB3
chr17	48554751	48555250	3.62939e-25	7.57166e-22	31.3818	HOXB3
chr17	50428501	50429000	6.08972e-23	8.2753e-20	17.7746	ACSF2
chr17	5123251	5123750	7.94477e-23	1.05732e-19	17.4967	ZNF232
chr17	58324751	58325250	1.27274e-19	8.81452e-17	10.373	TSPOAP1
chr17	65057751	65058250	4.80414e-31	2.64324e-27	17.015	GNA13
chr17	65058001	65058500	2.30447e-36	2.65852e-32	24.1473	GNA13
chr17	7084251	7084750	3.44938e-19	2.16595e-16	13.0178	CLEC10A
chr17	715251	715750	5.01413e-19	3.02375e-16	10.005	VPS53
chr17	715501	716000	8.38045e-21	7.40512e-18	11.9523	VPS53
chr17	7351001	7351500	1.28801e-27	4.12464e-24	12.9972	KCTD11
chr17	7383751	7384250	2.45171e-35	2.47264e-31	11.3767	TNK1
chr17	7408251	7408750	6.20202e-38	8.51455e-34	25.7608	NLGN2
chr17	75589501	75590000	8.84392e-34	7.30239e-30	33.3769	MYO15B
chr17	75633001	75633500	3.26452e-34	2.88655e-30	19.0746	SMIM5
chr17	75999751	76000250	3.14028e-30	1.54685e-26	15.8688	CDK3
chr17	76145001	76145500	6.18293e-36	6.79717e-32	17.2573	FOXJ1
chr17	76145251	76145750	7.52181e-48	2.91652e-43	19.8587	FOXJ1
chr17	78124001	78124500	3.18641e-28	1.13223e-24	23.7417	TMC6
chr17	78124251	78124750	8.17287e-25	1.6018e-21	28.6895	TMC6
chr17	7916251	7916750	7.02383e-22	7.71719e-19	14.5124	ENSG00000179859
chr17	7916501	7917000	3.75421e-20	2.92001e-17	29.8489	ENSG00000179859
chr17	81329001	81329500	1.99054e-23	2.98637e-20	27.874	TMEM105
chr17	81330001	81330500	1.47017e-18	7.97646e-16	30.0288	TMEM105
chr17	81965251	81965750	2.93103e-19	1.87284e-16	15.0003	NOTUM
chr17	82064501	82065000	3.01627e-20	2.39241e-17	19.0793	DUS1L
chr17	82336751	82337250	6.77542e-36	7.39189e-32	33.3611	SECTM1
chr17	82374751	82375250	2.02944e-44	5.62877e-40	19.9362	UTS2R
chr17	82375251	82375750	7.49801e-39	1.15048e-34	26.1291	UTS2R
chr17	82836001	82836500	1.18592e-19	8.26815e-17	24.2094	ZNF750
chr17	8795501	8796000	3.5535e-27	1.06098e-23	22.5571	MFSD6L
chr17	8799251	8799750	9.84703e-32	6.02431e-28	28.1427	MFSD6L
chr18	11982251	11982750	7.66402e-25	1.50877e-21	11.3091	IMPA2
chr18	12258251	12258750	4.80084e-29	1.95946e-25	13.5008	CIDEA
chr18	12309001	12309500	2.46939e-21	2.42153e-18	11.4842	TUBB6
chr18	63321251	63321750	3.36947e-19	2.1211e-16	11.088	BCL2
chr18	63971001	63971500	2.05316e-29	8.91244e-26	18.6724	SERPINB8
chr18	76823501	76824000	7.27969e-24	1.19017e-20	12.9352	ZNF236
chr18	79400751	79401250	4.14171e-21	3.88422e-18	33.8213	NFATC1
chr19	10870251	10870750	1.30689e-30	6.7932e-27	15.4504	CARM1
chr19	11579001	11579500	1.14146e-18	6.36264e-16	11.2909	ACP5
chr19	1174251	1174750	9.74092e-87	2.66186e-81	28.9786	SBNO2
chr19	1208001	1208500	4.02564e-19	2.48536e-16	11.8036	STK11
chr19	1265251	1265750	1.08739e-18	6.09084e-16	32.6974	CIRBP
chr19	12665251	12665750	2.37586e-21	2.33741e-18	15.4287	MAN2B1
chr19	1267751	1268250	8.03221e-20	5.81402e-17	18.7824	CIRBP
chr19	12680751	12681250	4.93209e-32	3.16237e-28	13.6206	DHPS
chr19	12736501	12737000	3.08085e-22	3.64155e-19	11.284	ASNA1
chr19	12800501	12801000	1.60336e-35	1.66083e-31	33.3894	PRDX2
chr19	12945001	12945500	4.8003e-21	4.44377e-18	12.2518	RAD23A
chr19	13794001	13794500	9.25444e-25	1.7966e-21	28.3841	ZSWIM4
chr19	15231001	15231500	1.45857e-22	1.83556e-19	14.6146	EPHX3
chr19	15673251	15673750	7.19101e-28	2.38671e-24	19.4824	CYP4F12
chr19	15673501	15674000	6.00825e-25	1.20894e-21	24.7505	CYP4F12
chr19	16474001	16474500	2.02574e-23	3.03046e-20	22.6579	EPS15L1
chr19	17308751	17309250	5.02617e-30	2.40761e-26	16.4943	DDA1
chr19	18571001	18571500	6.30525e-59	4.76095e-54	17.1672	UBA52
chr19	18939751	18940250	4.89461e-20	3.71782e-17	47.9195	HOMER3
chr19	20918751	20919250	1.07602e-18	6.02952e-16	54.5662	ZNF85
chr19	3225501	3226000	1.24985e-21	1.30621e-18	45.9146	CELF5
chr19	343751	344250	7.61412e-22	8.29428e-19	14.1398	MIER2
chr19	35225001	35225500	1.57694e-38	2.33231e-34	34.5486	FAM187B
chr19	3558251	3558750	8.66557e-30	4.01033e-26	17.202	MFSD12
chr19	35755251	35755750	1.22621e-38	1.84206e-34	27.4484	HSPB6
chr19	35755501	35756000	6.90664e-54	3.73909e-49	36.1627	HSPB6
chr19	35755751	35756250	3.82658e-28	1.33653e-24	39.6543	HSPB6
chr19	3761751	3762250	6.09502e-23	8.27883e-20	10.2943	APBA3
chr19	43798251	43798750	6.09524e-23	8.27883e-20	13.6537	LYPD5
chr19	43799501	43800000	1.3893e-18	7.58245e-16	33.4933	LYPD5
chr19	45091001	45091500	3.07607e-34	2.72833e-30	21.2605	PPP1R37
chr19	45234001	45234500	5.47763e-57	3.53189e-52	29.2556	EXOC3L2
chr19	4539501	4540000	1.36373e-26	3.6114e-23	30.3171	LRG1
chr19	45767251	45767750	7.94399e-27	2.21083e-23	27.956	SIX5
chr19	45771001	45771500	2.22517e-22	2.70709e-19	20.6789	SIX5
chr19	45914001	45914500	6.75858e-30	3.18429e-26	19.7437	NANOS2
chr19	46350251	46350750	3.58865e-22	4.17639e-19	15.6293	PPP5C
chr19	48676751	48677250	9.28929e-31	4.95579e-27	29.4295	NTN5
chr19	48810001	48810500	4.43077e-19	2.70804e-16	10.7002	BCAT2
chr19	49339501	49340000	8.63204e-33	6.17652e-29	40.7766	CD37
chr19	50427751	50428250	1.95923e-21	1.96353e-18	13.7754	MYBPC2
chr19	53963251	53963750	8.45883e-38	1.13681e-33	57.544	CACNG8
chr19	55119251	55119750	7.56499e-19	4.37889e-16	10.1234	PPP1R12C
chr19	55639751	55640250	1.9938e-23	2.99048e-20	21.9453	ZNF580
chr19	568001	568500	6.8977e-25	1.37108e-21	17.3392	BSG
chr19	5687251	5687750	1.12425e-21	1.18465e-18	12.4298	HSD11B1L
chr19	58003251	58003750	1.83372e-27	5.75026e-24	20.0016	ZNF606
chr19	58154251	58154750	8.99793e-19	5.12205e-16	22.9581	ZNF329
chr19	5825251	5825750	1.5201e-20	1.27906e-17	17.6483	NRTN
chr19	5827501	5828000	1.70693e-39	2.81475e-35	26.1226	NRTN
chr19	58350251	58350750	2.73957e-24	4.85374e-21	27.0354	A1BG
chr19	7349251	7349750	5.77668e-27	1.65254e-23	19.4424	ENSG00000263264
chr19	7679001	7679500	1.51493e-19	1.03126e-16	14.0379	TRAPPC5
chr19	832001	832500	6.18765e-29	2.47963e-25	20.7294	AZU1
chr19	832251	832750	3.68783e-28	1.292e-24	19.5229	AZU1
chr19	851001	851500	2.83143e-23	4.10106e-20	12.705	ELANE
chr19	920751	921250	8.42884e-34	6.99995e-30	10.9104	KISS1R
chr19	921001	921500	3.35026e-23	4.80524e-20	15.233	KISS1R
chr20	18493501	18494000	3.30507e-30	1.62384e-26	19.3545	RBBP9
chr20	37522251	37522750	4.4519e-23	6.22353e-20	22.6065	NNAT
chr20	3785751	3786250	2.82866e-25	5.9965e-22	13.4088	CENPB
chr20	38032501	38033000	2.20999e-24	3.99189e-21	13.3145	TTI1
chr20	45304001	45304500	2.77902e-28	1.00174e-24	25.4637	MATN4
chr20	45304251	45304750	3.34695e-43	8.20802e-39	19.6437	MATN4
chr20	46021251	46021750	3.11085e-20	2.46131e-17	11.0964	SLC12A5
chr20	4687001	4687500	9.62659e-30	4.41238e-26	17.7866	PRNP
chr20	49188501	49189000	2.2521e-42	5.14896e-38	26.2458	STAU1
chr20	49275001	49275500	7.5176e-20	5.47398e-17	15.1579	ZNFX1
chr20	50151251	50151750	6.67209e-19	3.91897e-16	19.7097	TMEM189-UBE2V1
chr20	50151501	50152000	5.45825e-23	7.48272e-20	13.549	TMEM189-UBE2V1
chr20	51766751	51767250	9.04827e-22	9.71818e-19	12.409	ATP9A
chr20	57713501	57714000	1.16412e-18	6.4783e-16	18.5718	PMEPA1
chr20	59006251	59006750	2.17547e-20	1.77684e-17	10.1333	CTSZ
chr20	62426501	62427000	6.35106e-36	6.96867e-32	29.7241	RBBP8NL
chr20	62817251	62817750	4.17421e-19	2.5677e-16	28.6936	COL9A3
chr20	62862001	62862500	8.89809e-30	4.1014e-26	34.3086	TCFL5
chr20	63501751	63502250	1.91426e-18	1.00994e-15	20.2268	EEF1A2
chr20	63534751	63535250	4.11499e-20	3.1731e-17	14.7821	PTK6
chr20	63694751	63695250	2.95608e-22	3.50925e-19	13.382	TNFRSF6B
chr21	17511501	17512000	5.33909e-21	4.89673e-18	14.2748	CXADR
chr21	29077001	29077500	1.26925e-45	3.95853e-41	23.9807	MAP3K7CL
chr21	29077251	29077750	7.48494e-32	4.66373e-28	23.896	MAP3K7CL
chr21	33931501	33932000	1.13496e-21	1.1944e-18	10.7948	ENSG00000249209
chr21	36136251	36136750	2.56692e-23	3.75299e-20	14.8314	CBR3
chr21	38257251	38257750	1.3755e-18	7.51899e-16	17.332	KCNJ15
chr22	18024751	18025250	2.2273e-28	8.2091e-25	15.5023	MICAL3
chr22	21628751	21629250	1.64397e-26	4.29407e-23	24.6008	YDJC
chr22	21629001	21629500	8.32752e-49	3.438e-44	14.6482	YDJC
chr22	24599501	24600000	1.67047e-19	1.12845e-16	20.976	GGT1
chr22	30245501	30246000	3.81569e-19	2.37003e-16	11.5094	LIF
chr22	30265751	30266250	3.23979e-26	8.08691e-23	13.8326	OSM
chr22	30636251	30636750	4.86576e-26	1.18216e-22	15.693	SLC35E4
chr22	30636501	30637000	3.32225e-22	3.89559e-19	19.7897	SLC35E4
chr22	37425501	37426000	1.30813e-23	2.03437e-20	29.2308	ELFN2
chr22	41926751	41927250	4.8305e-26	1.17409e-22	25.5909	TNFRSF13C
chr22	46262751	46263250	1.59592e-23	2.43572e-20	10.6048	PKDREJ
chr22	46263001	46263500	2.62128e-19	1.69664e-16	12.6842	PKDREJ
chr22	46533251	46533750	2.98729e-30	1.4791e-26	31.089	CELSR1
chr22	46533501	46534000	4.33978e-20	3.33479e-17	25.6069	CELSR1
chr22	50060751	50061250	3.94577e-19	2.44078e-16	15.7454	TTLL8
chr22	50089751	50090250	4.75568e-22	5.39239e-19	14.8792	MOV10L1
chr22	50262751	50263250	6.05977e-22	6.74056e-19	18.028	MAPK12
chr22	50546501	50547000	5.23143e-43	1.26671e-38	25.7484	KLHDC7B
chr22	50546751	50547250	1.15781e-44	3.25697e-40	37.405	KLHDC7B
