# Supplementary material for: Methylation patterns of the nasal epigenome of hospitalized SARS-CoV-2 positive patients reveal insights into molecular mechanisms of COVID-19
Source: Research Square preprint supplement (doi:10.21203/rs.3.rs-5026887/v1), 2024-10-22
Supplement: Supplementary file 1 [file f55b386e867363f603f0d8e7.pdf]

## SUPPLEMENTARY INFORMATION

### Methylation patterns of the nasal epigenome of hospitalized SARS-CoV-2 positive patients reveals insight into molecular mechanisms of COVID-19

Benjamin L. Spector, Boryana Koseva, Rebecca McLennan, Dithi Banerjee, Kamani Lankachandra, Todd Bradley, Rangaraj Selvarangan, Elin Grundberg

#### Table of contents

|                                                                                                                                                                                                         |        |
|---------------------------------------------------------------------------------------------------------------------------------------------------------------------------------------------------------|--------|
| Supplemental Figure 1: Hierarchical clustering of COVID-19 positive individuals shows no clustering by race or gender.                                                                                  | Page 2 |
| Supplemental Figure 2                                                                                                                                                                                   | Page 3 |
| Supplemental Figure 3: <i>ELF4</i> expressed broadly across immune cell types.                                                                                                                          | Page 4 |
| Supplemental Figure 4: Distribution of <i>ELF4</i> transcription factor binding motifs across cell type-specific DHSs.                                                                                  | Page 5 |
| Supplemental Table 1: Percent UMR and LMR overlapping regulatory elements by cell type in COVID-19 positive (severe + mild) and negative individuals                                                    | Page 6 |
| Supplemental Table 2: Percent UMR and LMR overlapping regulatory elements by cell type in severe and mild COVID-19.                                                                                     | Page 7 |
| Supplemental Table 3: Relatively hypomethylated genes in severe as compared to mild COVID-19 cases.                                                                                                     | .XLSX  |
| Supplemental Table 4: Relatively hypermethylated genes in severe as compared to mild COVID-19 cases.                                                                                                    | .XLSX  |
| Supplemental Table 5: Enriched pathways associated relatively hypomethylated genes in severe as compared to mild COVID-19 cases.                                                                        | .XLSX  |
| Supplemental Table 6: Enriched pathways associated relatively hypermethylated genes in severe as compared to mild COVID-19 cases.                                                                       | .XLSX  |
| Supplemental Table 7: PI3k/Akt pathway associated DMRs. Methylation difference reflects percent difference in mean regional methylation between hospitalized versus non-hospitalized COVID-19 subjects. | Page 8 |

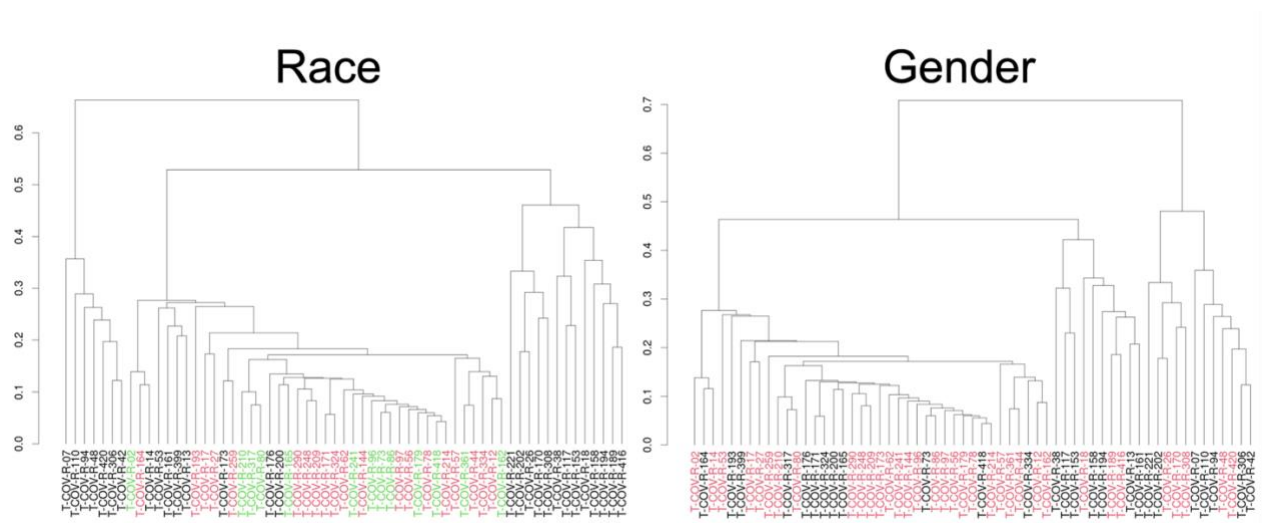

**Supplemental Figure 1: Hierarchical clustering of COVID-19 positive individuals shows no clustering by race or gender.** Hierarchical clustering was performed at the top 25<sup>th</sup> percentile most variable CpG methylation sites and showed no clustering structure by race (Black individuals = Black, Caucasian individuals = Green, Other races = Red), or gender (Female = Black, Male = Red).

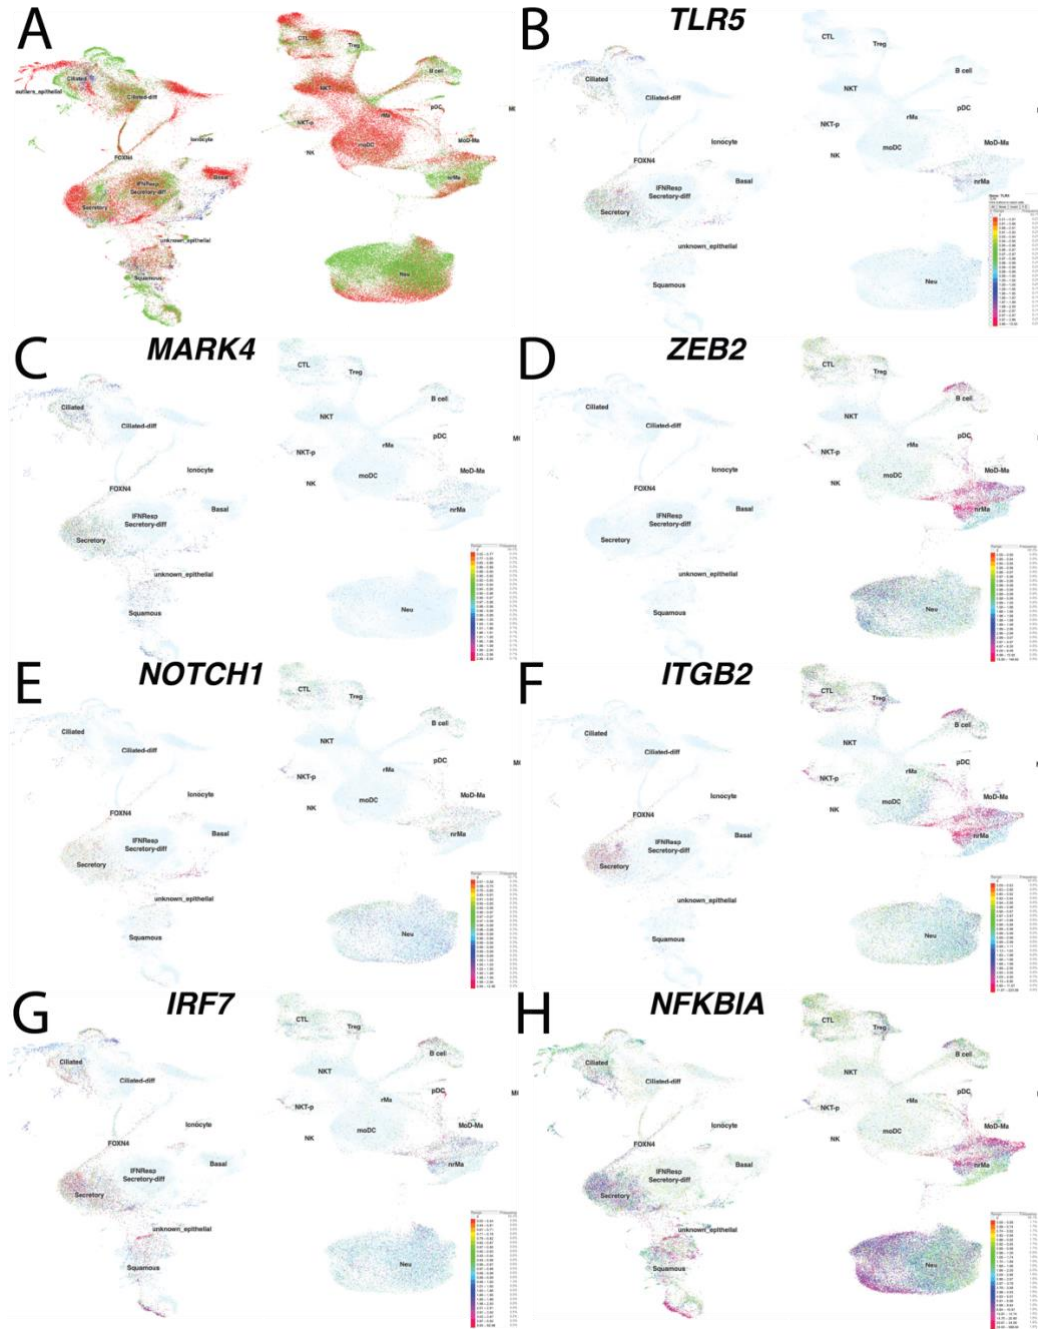

**Supplemental Figure 2:** CTL = Cytotoxic T lymphocytes, MC = Mast cell, moDC = Monocyte-derived dendritic cell, MoD-Ma = Monocyte-derived macrophage, Neu = Neutrophil, NK = Natural killer cell, NKT = NK T cell, NKT-p = Proliferating NKT cell, nrMA = non-resident macrophage, pDC = Plasmacytoid dendritic cell, rMA = Resident macrophage, Treg = Regulatory T cell. UMAP demonstrating differential gene expression by disease severity and cell-type in the nasopharynx. **(A)** Clustering by COVID-19 severity, Blue = Control, Red= Mild/moderate disease, Green = Critical disease. Gene expression as determined by scRNA-seq of **(B)** *TLR5*, **(C)** *MARK4*, **(D)** *ZEB2*, **(E)** *NOTCH1*, **(F)** *ITGB2*, **(G)** *IRF7*, **(H)** *NFKBIA*. Figure generated using the dataset of Chua *et al.* and the UCSC Cell Browser (<https://covid-airways.cells.ucsc.edu>) [45,47].

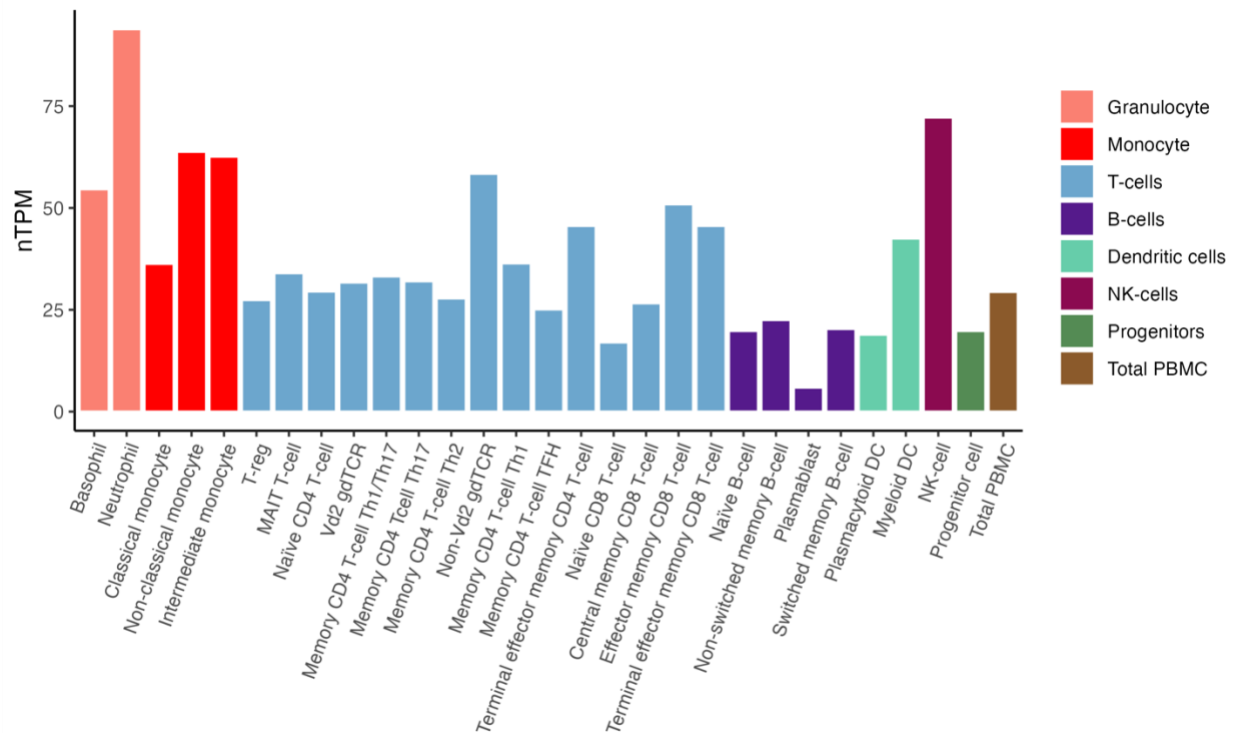

**Supplemental Figure 3: *ELF4* expressed broadly across immune cell types.** Presented as normalized transcripts per million (y-axis). Granulocytes = pink, Monocytes = red, T-cells = blue, B-cells = purple, Dendritic cells = teal, NK cells = magenta, Progenitors = olive, Total PBMC = brown. Figure generated using dataset of Monaco *et al.* Image credit: Human Protein Atlas. Image available from: [v23.proteinatlas.org/ENSG00000102034-ELF4/immune+cell](https://v23.proteinatlas.org/ENSG00000102034-ELF4/immune+cell)

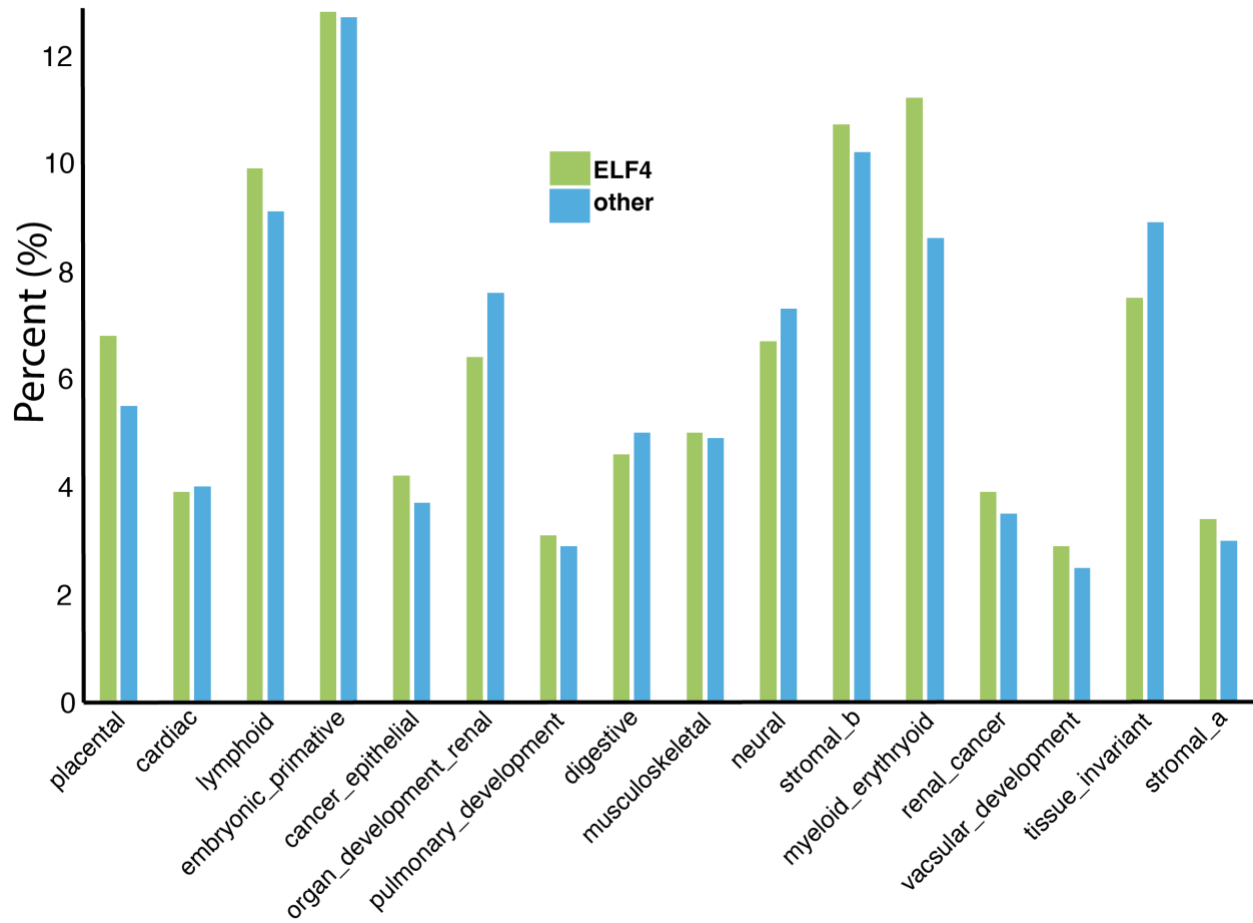

**Supplemental Figure 4: Distribution of *ELF4* transcription factor binding motifs across cell type-specific DHSs.** Among hypermethylated regions, a higher percentage of *ELF4* transcription factor binding motifs (blue) localize to myeloid specific DHSs as compared to hypermethylated DMRs that are not targets of the *ELF4* transcription factor (orange).

**Supplemental Table 1:** Percent UMR and LMR overlapping regulatory elements by cell type in COVID-19 positive (severe + mild) and negative individuals.

| Cell Type  | Overlapping single or multiple cell types |              |                              |                           | Overlapping single cell type only |              |                              |                           |
|------------|-------------------------------------------|--------------|------------------------------|---------------------------|-----------------------------------|--------------|------------------------------|---------------------------|
|            | COVID-19 Status                           |              | <sup>a</sup> Fold Difference | <sup>b</sup> <i>p</i>     | COVID-19 Status                   |              | <sup>a</sup> Fold Difference | <sup>b</sup> <i>p</i>     |
|            | Positive (%)                              | Negative (%) |                              |                           | Positive (%)                      | Negative (%) |                              |                           |
| Immune     |                                           |              |                              |                           |                                   |              |                              |                           |
| UMR        | 64                                        | 62           | 1.0                          | 0.0054                    | 8                                 | 4            | 1.9                          | 0.069                     |
| LMR        | 46                                        | 25           | 1.9                          | < 2.2 x 10 <sup>-16</sup> | 31                                | 8            | 4.1                          | 0.0037                    |
| Lymphoid   |                                           |              |                              |                           |                                   |              |                              |                           |
| UMR        | 49                                        | 48           | 1.0                          | 0.051                     | 5                                 | 3            | 1.8                          | 0.21                      |
| LMR        | 24                                        | 15           | 1.6                          | < 2.2 x 10 <sup>-16</sup> | 11                                | 4            | 2.6                          | 5.6 x 10 <sup>-16</sup>   |
| Myeloid    |                                           |              |                              |                           |                                   |              |                              |                           |
| UMR        | 33                                        | 32           | 1.0                          | 0.0015                    | 3                                 | 1            | 2.5                          | 0.26                      |
| LMR        | 28                                        | 12           | 2.4                          | < 2.2 x 10 <sup>-16</sup> | 20                                | 3            | 6.3                          | < 2.2 x 10 <sup>-16</sup> |
| Pulmonary  |                                           |              |                              |                           |                                   |              |                              |                           |
| UMR        | 15                                        | 17           | 0.91                         | 7.0 x 10 <sup>-5</sup>    | 0.6                               | 0.7          | 0.83                         | 1.0                       |
| LMR        | 7                                         | 10           | 0.66                         | < 2.2 x 10 <sup>-16</sup> | 2                                 | 3            | 0.27                         | < 2.2 x 10 <sup>-16</sup> |
| Epithelial |                                           |              |                              |                           |                                   |              |                              |                           |
| UMR        | 13                                        | 17           | 0.76                         | < 2.2 x 10 <sup>-16</sup> | 0.6                               | 3            | 0.18                         | 0.032                     |
| LMR        | 8                                         | 19           | 0.43                         | < 2.2 x 10 <sup>-16</sup> | 3                                 | 11           | 0.22                         | < 2.2 x 10 <sup>-16</sup> |

<sup>a</sup>Fold difference between COVID-19 positive vs negative patients

<sup>b</sup>*p*-value reflects chi-square examining COVID-19 positive vs negative patients

**Supplemental Table 2:** Percent UMR and LMR overlapping regulatory elements by cell type in severe and mild COVID-19.

| Cell Type  | Overlapping single or multiple cell types |          |                              |                        | Overlapping single cell type only |          |                              |                        |
|------------|-------------------------------------------|----------|------------------------------|------------------------|-----------------------------------|----------|------------------------------|------------------------|
|            | COVID-19 Status                           |          | <sup>a</sup> Fold Difference | <sup>b</sup> <i>p</i>  | COVID-19 Status                   |          | <sup>a</sup> Fold Difference | <sup>b</sup> <i>p</i>  |
|            | Severe (%)                                | Mild (%) |                              |                        | Severe (%)                        | Mild (%) |                              |                        |
| Immune     |                                           |          |                              |                        |                                   |          |                              |                        |
| UMR        | 64                                        | 64       | 1.0                          | 0.84                   | 9                                 | 9        | 1.1                          | 0.87                   |
| LMR        | 44                                        | 46       | 0.97                         | 2.5 x 10 <sup>-6</sup> | 28                                | 31       | 0.90                         | 9.3 x 10 <sup>-8</sup> |
| Lymphoid   |                                           |          |                              |                        |                                   |          |                              |                        |
| UMR        | 49                                        | 49       | 1.0                          | 0.86                   | 6                                 | 6        | 1.1                          | 0.89                   |
| LMR        | 24                                        | 24       | 1.0                          | 0.74                   | 10                                | 11       | 0.96                         | 0.25                   |
| Myeloid    |                                           |          |                              |                        |                                   |          |                              |                        |
| UMR        | 34                                        | 33       | 1.0                          | 0.55                   | 3                                 | 3        | 1.0                          | 1.0                    |
| LMR        | 26                                        | 28       | 0.94                         | 1.8 x 10 <sup>-9</sup> | 18                                | 20       | 0.87                         | 1.1 x 10 <sup>-7</sup> |
| Pulmonary  |                                           |          |                              |                        |                                   |          |                              |                        |
| UMR        | 15                                        | 15       | 1.0                          | 0.89                   | 0.3                               | 0.3      | 0.95                         | 1.0                    |
| LMR        | 7                                         | 7        | 0.99                         | 0.59                   | 1                                 | 2        | 0.93                         | 0.50                   |
| Epithelial |                                           |          |                              |                        |                                   |          |                              |                        |
| UMR        | 13                                        | 13       | 1.0                          | 0.45                   | 2                                 | 0.6      | 2.8                          | 0.32                   |
| LMR        | 9                                         | 8        | 1.1                          | 4.8 x 10 <sup>-8</sup> | 4                                 | 3        | 1.4                          | 5.1 x 10 <sup>-6</sup> |

<sup>a</sup>Fold difference between severe vs mild COVID-19 patients

<sup>b</sup>*p*-value reflects chi-square examining severe vs mild COVID-19 patients

**Supplemental Table 7:** PI3k/Akt pathway associated DMRs. Methylation difference reflects percent difference in mean regional methylation between hospitalized versus non-hospitalized COVID-19 subjects.

| Gene          | Chromosome | Start     | Stop      | Methylation difference (%) | q-value                |
|---------------|------------|-----------|-----------|----------------------------|------------------------|
| <i>AKT1</i>   | chr14      | 104796001 | 104796500 | -18.38                     | $2.22 \times 10^{-22}$ |
| <i>ISG15</i>  | chr1       | 1013751   | 1014250   | -32.27                     | $2.49 \times 10^{-35}$ |
| <i>ZEB2</i>   | chr2       | 144524251 | 144524750 | -24.39                     | $2.52 \times 10^{-32}$ |
| <i>SNAI1</i>  | chr20      | 49983251  | 49983750  | -28.98                     | $6.11 \times 10^{-16}$ |
| <i>TLR5</i>   | chr1       | 223133001 | 223133750 | -15.09                     | $1.22 \times 10^{-16}$ |
| <i>MARK4</i>  | chr19      | 45248251  | 45248750  | -10.08                     | $2.33 \times 10^{-19}$ |
| <i>NOTCH1</i> | chr9       | 136549501 | 136550000 | -20.24                     | $2.23 \times 10^{-16}$ |
| <i>ITGB2</i>  | chr21      | 44923751  | 44924500  | -22.09                     | $1.08 \times 10^{-33}$ |
| <i>IRF7</i>   | chr11      | 615001    | 615500    | -17.76                     | $1.43 \times 10^{-33}$ |
| <i>NFKBIA</i> | chr14      | 35402001  | 35402500  | -15.80                     | $1.02 \times 10^{-16}$ |
