# Supplementary material for: Methylation patterns of the nasal epigenome of hospitalized SARS-CoV-2 positive patients reveal insights into molecular mechanisms of COVID-19
Source: Research Square preprint supplement (doi:10.21203/rs.3.rs-5026887/v1), 2024-10-22
Supplement: Supplementary file 2 [file 02076fa2f368728f0ceff702.xlsx]

## Sheet: SupplementalTable6
Category	CategoryID	GO	Description	PARENT_GO	LogP	Enrichment	Z-score	#TotalGeneInLibrary	#GeneInGO	#GeneInHitList	#GeneInGOAndHitList	%InGO	STDV %InGO	GeneID	Hits	Log(q-value)	GeneList
GO Biological Processes	19	GO:0035239	tube morphogenesis	19_GO:0032502 developmental process	-8.5	3.1	7.3	30182	670	502	35	7	1.1	302|596|682|780|1522|2034|2296|2624|3142|3202|3213|3845|4323|6469|7010|7127|7855|7976|8321|8828|9289|9620|9788|10672|22846|23059|30008|30812|54538|54910|55366|56963|64218|79977|80004	ANXA2|BCL2|BSG|DDR1|CTSZ|EPAS1|FOXC1|GATA2|HLX|HOXA5|HOXB3|KRAS|MMP14|SHH|TEK|TNFAIP2|FZD5|FZD3|FZD1|NRP2|ADGRG1|CELSR1|MTSS1|GNA13|VASH1|CLUAP1|EFEMP2|SOX8|ROBO4|SEMA4C|LGR4|RGMA|SEMA4A|GRHL2|ESRP2	-5.9	MyList
KEGG Pathway	24	hsa05022	Pathways of neurodegeneration - multiple diseases		-6.8	3.3	6.5	30182	476	502	26	5.2	0.99	489|596|810|1339|3845|4728|5606|5621|5630|5710|6300|7186|7311|7384|7855|7976|8321|8326|10023|11211|51806|55567|55626|80208|84617|118424	ATP2A3|BCL2|CALML3|COX6A2|KRAS|NDUFS8|MAP2K3|PRNP|PRPH|PSMD4|MAPK12|TRAF2|UBA52|UQCRC1|FZD5|FZD3|FZD1|FZD9|FRAT1|FZD10|CALML5|DNAH3|AMBRA1|SPG11|TUBB6|UBE2J2	-4.6	MyList
GO Biological Processes	19	GO:0060425	lung morphogenesis	19_GO:0032502 developmental process	-6.1	10	8.3	30182	46	502	8	1.6	0.56	1522|3202|3845|3976|6469|9620|79977|80004	CTSZ|HOXA5|KRAS|LIF|SHH|CELSR1|GRHL2|ESRP2	-4	MyList
GO Biological Processes	19	GO:0008283	cell population proliferation	19_GO:0009987 cellular process	-6	2.7	5.8	30182	699	502	31	6.2	1.1	596|780|858|1018|1525|1992|2242|2268|2296|2624|3142|3845|3976|4323|5176|6469|6794|7001|7010|7976|8326|8660|9289|9788|23228|27185|55366|79977|80004|84296|147912	BCL2|DDR1|CAV2|CDK3|CXADR|SERPINB1|FES|FGR|FOXC1|GATA2|HLX|KRAS|LIF|MMP14|SERPINF1|SHH|STK11|PRDX2|TEK|FZD3|FZD9|IRS2|ADGRG1|MTSS1|PLCL2|DISC1|LGR4|GRHL2|ESRP2|GINS4|SIX5	-4	MyList
GO Biological Processes	19	GO:0060562	epithelial tube morphogenesis	19_GO:0032502 developmental process	-5.8	3.6	6.1	30182	313	502	19	3.8	0.85	596|780|1522|3202|3845|4323|6469|7976|8321|9620|9788|10672|23059|30812|54910|55366|56963|79977|80004	BCL2|DDR1|CTSZ|HOXA5|KRAS|MMP14|SHH|FZD3|FZD1|CELSR1|MTSS1|GNA13|CLUAP1|SOX8|SEMA4C|LGR4|RGMA|GRHL2|ESRP2	-3.8	MyList
GO Biological Processes	19	GO:0002521	leukocyte differentiation	19_GO:0032502 developmental process	-5.8	3.3	6	30182	406	502	22	4.4	0.91	302|596|925|1053|1440|2529|2624|2841|3142|3662|3932|3976|4772|6469|6794|7855|8326|9855|22904|23228|26191|64218	ANXA2|BCL2|CD8A|CEBPE|CSF3|FUT7|GATA2|GPR18|HLX|IRF4|LCK|LIF|NFATC1|SHH|STK11|FZD5|FZD9|FARP2|SBNO2|PLCL2|PTPN22|SEMA4A	-3.8	MyList
GO Biological Processes	19	GO:0002009	morphogenesis of an epithelium	19_GO:0032502 developmental process	-5.6	3.1	5.7	30182	451	502	23	4.6	0.93	389|596|780|1522|3202|3845|3872|4323|6469|7855|7976|8321|9620|9788|10672|23059|30812|54910|55366|56963|79977|80004|116844	RHOC|BCL2|DDR1|CTSZ|HOXA5|KRAS|KRT17|MMP14|SHH|FZD5|FZD3|FZD1|CELSR1|MTSS1|GNA13|CLUAP1|SOX8|SEMA4C|LGR4|RGMA|GRHL2|ESRP2|LRG1	-3.6	MyList
GO Biological Processes	19	GO:0018108	peptidyl-tyrosine phosphorylation	19_GO:0008152 metabolic process	-5.5	4.9	6.4	30182	159	502	13	2.6	0.71	780|2242|2268|3932|3976|4486|5606|5753|7010|7465|8711|10645|57410	DDR1|FES|FGR|LCK|LIF|MST1R|MAP2K3|PTK6|TEK|WEE1|TNK1|CAMKK2|SCYL1	-3.6	MyList
GO Biological Processes	19	GO:0018212	peptidyl-tyrosine modification	19_GO:0008152 metabolic process	-5.5	4.9	6.4	30182	161	502	13	2.6	0.71	780|2242|2268|3932|3976|4486|5606|5753|7010|7465|8711|10645|57410	DDR1|FES|FGR|LCK|LIF|MST1R|MAP2K3|PTK6|TEK|WEE1|TNK1|CAMKK2|SCYL1	-3.5	MyList
GO Biological Processes	19	GO:0060441	epithelial tube branching involved in lung morphogenesis	19_GO:0032502 developmental process	-5.4	14	8.5	30182	26	502	6	1.2	0.49	1522|3202|3845|6469|9620|80004	CTSZ|HOXA5|KRAS|SHH|CELSR1|ESRP2	-3.5	MyList
GO Biological Processes	19	GO:0048729	tissue morphogenesis	19_GO:0032502 developmental process	-5.4	2.8	5.5	30182	566	502	26	5.2	0.99	389|596|780|1522|2296|3202|3845|3872|4323|6469|7855|7976|8321|8828|9620|9788|10672|23059|30008|30812|54910|55366|56963|79977|80004|116844	RHOC|BCL2|DDR1|CTSZ|FOXC1|HOXA5|KRAS|KRT17|MMP14|SHH|FZD5|FZD3|FZD1|NRP2|CELSR1|MTSS1|GNA13|CLUAP1|EFEMP2|SOX8|SEMA4C|LGR4|RGMA|GRHL2|ESRP2|LRG1	-3.5	MyList
GO Biological Processes	19	GO:0061138	morphogenesis of a branching epithelium	19_GO:0032502 developmental process	-5.4	4.7	6.3	30182	165	502	13	2.6	0.71	596|780|1522|3202|3845|4323|6469|7855|9620|10672|30812|79977|80004	BCL2|DDR1|CTSZ|HOXA5|KRAS|MMP14|SHH|FZD5|CELSR1|GNA13|SOX8|GRHL2|ESRP2	-3.5	MyList
GO Biological Processes	19	GO:0030097	hemopoiesis	19_GO:0032502 developmental process	-5.2	2.6	5.2	30182	659	502	28	5.6	1	302|596|925|1053|1440|2034|2529|2624|2841|3142|3213|3662|3932|3976|4772|6469|6794|7010|7855|8326|9855|22904|23228|23456|26191|51522|54443|64218	ANXA2|BCL2|CD8A|CEBPE|CSF3|EPAS1|FUT7|GATA2|GPR18|HLX|HOXB3|IRF4|LCK|LIF|NFATC1|SHH|STK11|TEK|FZD5|FZD9|FARP2|SBNO2|PLCL2|ABCB10|PTPN22|TMEM14C|ANLN|SEMA4A	-3.3	MyList
Reactome Gene Sets	6	R-HSA-6798695	Neutrophil degranulation		-5.1	2.9	5.4	30182	482	502	23	4.6	0.93	1|302|566|966|1522|1991|1992|2268|2588|3074|3683|4125|5337|5869|6286|6993|11322|51806|53831|54509|79792|93100|116844	A1BG|ANXA2|AZU1|CD59|CTSZ|ELANE|SERPINB1|FGR|GALNS|HEXB|ITGAL|MAN2B1|PLD1|RAB5B|S100P|DYNLT1|TMC6|CALML5|GPR84|RHOF|GSDMD|NAPRT|LRG1	-3.3	MyList
GO Biological Processes	19	GO:0001763	morphogenesis of a branching structure	19_GO:0032502 developmental process	-5.1	4.5	6	30182	175	502	13	2.6	0.71	596|780|1522|3202|3845|4323|6469|7855|9620|10672|30812|79977|80004	BCL2|DDR1|CTSZ|HOXA5|KRAS|MMP14|SHH|FZD5|CELSR1|GNA13|SOX8|GRHL2|ESRP2	-3.2	MyList
GO Biological Processes	19	GO:0030324	lung development	19_GO:0032502 developmental process	-5	4.3	5.8	30182	180	502	13	2.6	0.71	1522|2034|2302|3202|3845|3976|4323|6469|9509|9620|10741|79977|80004	CTSZ|EPAS1|FOXJ1|HOXA5|KRAS|LIF|MMP14|SHH|ADAMTS2|CELSR1|RBBP9|GRHL2|ESRP2	-3.1	MyList
GO Biological Processes	19	GO:0030323	respiratory tube development	19_GO:0032502 developmental process	-4.9	4.2	5.7	30182	184	502	13	2.6	0.71	1522|2034|2302|3202|3845|3976|4323|6469|9509|9620|10741|79977|80004	CTSZ|EPAS1|FOXJ1|HOXA5|KRAS|LIF|MMP14|SHH|ADAMTS2|CELSR1|RBBP9|GRHL2|ESRP2	-3.1	MyList
GO Biological Processes	19	GO:0051098	regulation of binding	19_GO:0065007 biological regulation	-4.8	3.1	5.3	30182	369	502	19	3.8	0.85	302|489|1440|1522|2296|3662|3925|3976|4043|5901|5909|6815|9236|10498|23228|27185|56963|64324|64855	ANXA2|ATP2A3|CSF3|CTSZ|FOXC1|IRF4|STMN1|LIF|LRPAP1|RAN|RAP1GAP|STYX|CCPG1|CARM1|PLCL2|DISC1|RGMA|NSD1|NIBAN2	-3	MyList
GO Biological Processes	19	GO:0007420	brain development	19_GO:0032502 developmental process	-4.7	2.3	4.9	30182	777	502	30	6	1.1	596|664|2296|2302|2624|3199|3213|3845|4826|5209|5901|6387|6414|6469|6513|7976|8321|8660|8828|9289|9531|26468|27185|54910|55506|57555|63826|79977|84002|113246	BCL2|BNIP3|FOXC1|FOXJ1|GATA2|HOXA2|HOXB3|KRAS|NNAT|PFKFB3|RAN|CXCL12|SELENOP|SHH|SLC2A1|FZD3|FZD1|IRS2|NRP2|ADGRG1|BAG3|LHX6|DISC1|SEMA4C|MACROH2A2|NLGN2|SRR|GRHL2|B3GNT5|C12orf57	-2.9	MyList
GO Biological Processes	19	GO:0050673	epithelial cell proliferation	19_GO:0009987 cellular process	-4.6	4.3	5.6	30182	167	502	12	2.4	0.68	858|1992|3142|4323|5176|6469|6794|7010|8660|9788|55366|80004	CAV2|SERPINB1|HLX|MMP14|SERPINF1|SHH|STK11|TEK|IRS2|MTSS1|LGR4|ESRP2	-2.9	MyList
GO Biological Processes	19	GO:0042327	positive regulation of phosphorylation	19_GO:0048518 positive regulation of biological process	-4.6	2.3	4.8	30182	786	502	30	6	1.1	566|596|780|1440|1815|1917|1991|2268|3845|3976|4486|5008|5170|5606|5621|5753|6794|7010|7044|7186|7855|8115|8321|10645|11211|55626|116986|133522|222658|245711	AZU1|BCL2|DDR1|CSF3|DRD4|EEF1A2|ELANE|FGR|KRAS|LIF|MST1R|OSM|PDPK1|MAP2K3|PRNP|PTK6|STK11|TEK|LEFTY2|TRAF2|FZD5|TCL1A|FZD1|CAMKK2|FZD10|AMBRA1|AGAP2|PPARGC1B|KCTD20|SPDYA	-2.8	MyList
GO Biological Processes	19	GO:0009792	embryo development ending in birth or egg hatching	19_GO:0032502 developmental process	-4.6	2.4	4.8	30182	670	502	27	5.4	1	672|2034|2296|2299|2624|3199|3202|3213|3976|4323|6469|7855|7976|8321|9546|9620|10049|10672|22846|23059|30812|54910|55626|56963|79893|79977|84296	BRCA1|EPAS1|FOXC1|FOXI1|GATA2|HOXA2|HOXA5|HOXB3|LIF|MMP14|SHH|FZD5|FZD3|FZD1|APBA3|CELSR1|DNAJB6|GNA13|VASH1|CLUAP1|SOX8|SEMA4C|AMBRA1|RGMA|GGNBP2|GRHL2|GINS4	-2.8	MyList
GO Biological Processes	19	GO:0051347	positive regulation of transferase activity	19_GO:0065007 biological regulation	-4.6	2.6	4.9	30182	522	502	23	4.6	0.93	566|780|1815|1917|1991|2268|4486|5170|5606|5621|6794|7010|7186|7855|8115|10645|11211|55626|63922|79977|84296|116986|245711	AZU1|DDR1|DRD4|EEF1A2|ELANE|FGR|MST1R|PDPK1|MAP2K3|PRNP|STK11|TEK|TRAF2|FZD5|TCL1A|CAMKK2|FZD10|AMBRA1|CHTF18|GRHL2|GINS4|AGAP2|SPDYA	-2.8	MyList
GO Biological Processes	19	GO:0060428	lung epithelium development	19_GO:0032502 developmental process	-4.5	9.7	6.9	30182	37	502	6	1.2	0.49	2302|3202|3845|6469|10741|79977	FOXJ1|HOXA5|KRAS|SHH|RBBP9|GRHL2	-2.8	MyList
GO Biological Processes	19	GO:0043549	regulation of kinase activity	19_GO:0008152 metabolic process	-4.5	2.3	4.7	30182	720	502	28	5.6	1	566|780|1815|1917|1991|2268|4486|5170|5339|5606|5621|5753|6794|7010|7186|7532|7855|8115|8660|9088|10645|11211|26191|55626|79893|116986|124997|245711	AZU1|DDR1|DRD4|EEF1A2|ELANE|FGR|MST1R|PDPK1|PLEC|MAP2K3|PRNP|PTK6|STK11|TEK|TRAF2|YWHAG|FZD5|TCL1A|IRS2|PKMYT1|CAMKK2|FZD10|PTPN22|AMBRA1|GGNBP2|AGAP2|WDR81|SPDYA	-2.7	MyList
GO Biological Processes	19	GO:0030217	T cell differentiation	19_GO:0002376 immune system process	-4.4	4.2	5.4	30182	173	502	12	2.4	0.68	596|925|2529|2841|3142|3662|3932|6469|6794|7855|26191|64218	BCL2|CD8A|FUT7|GPR18|HLX|IRF4|LCK|SHH|STK11|FZD5|PTPN22|SEMA4A	-2.7	MyList
GO Biological Processes	19	GO:0001525	angiogenesis	19_GO:0032502 developmental process	-4.4	3.1	5	30182	326	502	17	3.4	0.81	302|682|2034|2296|2624|3213|4323|6469|7010|7127|7855|8828|9289|10672|22846|54538|64218	ANXA2|BSG|EPAS1|FOXC1|GATA2|HOXB3|MMP14|SHH|TEK|TNFAIP2|FZD5|NRP2|ADGRG1|GNA13|VASH1|ROBO4|SEMA4A	-2.7	MyList
GO Biological Processes	19	GO:0033674	positive regulation of kinase activity	19_GO:0048518 positive regulation of biological process	-4.4	2.8	4.9	30182	428	502	20	4	0.87	566|780|1815|1917|1991|2268|4486|5170|5606|5621|6794|7010|7186|7855|8115|10645|11211|55626|116986|245711	AZU1|DDR1|DRD4|EEF1A2|ELANE|FGR|MST1R|PDPK1|MAP2K3|PRNP|STK11|TEK|TRAF2|FZD5|TCL1A|CAMKK2|FZD10|AMBRA1|AGAP2|SPDYA	-2.7	MyList
GO Biological Processes	19	GO:0043009	chordate embryonic development	19_GO:0032502 developmental process	-4.4	2.4	4.7	30182	648	502	26	5.2	0.99	672|2034|2296|2624|3199|3202|3213|3976|4323|6469|7855|7976|8321|9546|9620|10049|10672|22846|23059|30812|54910|55626|56963|79893|79977|84296	BRCA1|EPAS1|FOXC1|GATA2|HOXA2|HOXA5|HOXB3|LIF|MMP14|SHH|FZD5|FZD3|FZD1|APBA3|CELSR1|DNAJB6|GNA13|VASH1|CLUAP1|SOX8|SEMA4C|AMBRA1|RGMA|GGNBP2|GRHL2|GINS4	-2.7	MyList
GO Biological Processes	19	GO:0060541	respiratory system development	19_GO:0032502 developmental process	-4.4	3.8	5.3	30182	205	502	13	2.6	0.71	1522|2034|2302|3202|3845|3976|4323|6469|9509|9620|10741|79977|80004	CTSZ|EPAS1|FOXJ1|HOXA5|KRAS|LIF|MMP14|SHH|ADAMTS2|CELSR1|RBBP9|GRHL2|ESRP2	-2.7	MyList
GO Biological Processes	19	GO:0060070	canonical Wnt signaling pathway	19_GO:0023052 signaling	-4.3	5.4	5.7	30182	101	502	9	1.8	0.59	6469|7855|7976|8321|8326|10023|11211|27185|55366	SHH|FZD5|FZD3|FZD1|FZD9|FRAT1|FZD10|DISC1|LGR4	-2.6	MyList
GO Biological Processes	19	GO:0042110	T cell activation	19_GO:0002376 immune system process	-4.2	3.2	4.9	30182	304	502	16	3.2	0.78	596|925|1525|2529|2841|3142|3662|3683|3902|3932|6469|6794|7001|7855|26191|64218	BCL2|CD8A|CXADR|FUT7|GPR18|HLX|IRF4|ITGAL|LAG3|LCK|SHH|STK11|PRDX2|FZD5|PTPN22|SEMA4A	-2.6	MyList
GO Biological Processes	19	GO:0048863	stem cell differentiation	19_GO:0032502 developmental process	-4.2	3.9	5.2	30182	184	502	12	2.4	0.68	596|2296|3976|4902|6469|8321|8828|11166|30812|54910|64218|399694	BCL2|FOXC1|LIF|NRTN|SHH|FZD1|NRP2|SOX21|SOX8|SEMA4C|SEMA4A|SHC4	-2.5	MyList
GO Biological Processes	19	GO:0008285	negative regulation of cell population proliferation	19_GO:0048519 negative regulation of biological process	-4.2	2.2	4.5	30182	787	502	29	5.8	1	596|780|858|1493|1525|2302|2624|3976|5008|5176|5621|5909|6469|6794|7855|9289|9788|10672|22846|29956|30008|55626|64855|79893|84871|115572|138151|147912|414062	BCL2|DDR1|CAV2|CTLA4|CXADR|FOXJ1|GATA2|LIF|OSM|SERPINF1|PRNP|RAP1GAP|SHH|STK11|FZD5|ADGRG1|MTSS1|GNA13|VASH1|CERS2|EFEMP2|AMBRA1|NIBAN2|GGNBP2|AGBL4|TENT5B|NACC2|SIX5|CCL3L3	-2.5	MyList
GO Biological Processes	19	GO:0055065	metal ion homeostasis	19_GO:0042592 homeostatic process	-4.2	2.8	4.7	30182	410	502	19	3.8	0.85	368|489|596|664|858|1815|1991|2034|3074|3932|4241|5621|6387|8326|9256|10723|27185|57468|66002	ABCC6|ATP2A3|BCL2|BNIP3|CAV2|DRD4|ELANE|EPAS1|HEXB|LCK|MELTF|PRNP|CXCL12|FZD9|TSPOAP1|SLC12A7|DISC1|SLC12A5|CYP4F12	-2.5	MyList
GO Biological Processes	19	GO:0098773	skin epidermis development	19_GO:0032502 developmental process	-4.1	5.1	5.5	30182	107	502	9	1.8	0.59	596|3872|3925|5339|6469|7357|7976|11166|55366	BCL2|KRT17|STMN1|PLEC|SHH|UGCG|FZD3|SOX21|LGR4	-2.5	MyList
GO Biological Processes	19	GO:0097190	apoptotic signaling pathway	19_GO:0023052 signaling	-4.1	3.1	4.8	30182	312	502	16	3.2	0.78	489|596|664|672|5170|6469|6794|7001|7186|8326|9531|10277|27141|64065|85450|133746	ATP2A3|BCL2|BNIP3|BRCA1|PDPK1|SHH|STK11|PRDX2|TRAF2|FZD9|BAG3|UBE4B|CIDEB|PERP|ITPRIP|JMY	-2.5	MyList
GO Biological Processes	19	GO:0002683	negative regulation of immune system process	19_GO:0002376 immune system process	-4.1	2.6	4.6	30182	487	502	21	4.2	0.89	54|966|1379|1493|2268|2302|2624|2841|3142|3662|3902|5170|5621|6387|6469|7001|10225|23228|26191|55366|124626	ACP5|CD59|CR1L|CTLA4|FGR|FOXJ1|GATA2|GPR18|HLX|IRF4|LAG3|PDPK1|PRNP|CXCL12|SHH|PRDX2|CD96|PLCL2|PTPN22|LGR4|ZPBP2	-2.5	MyList
GO Biological Processes	19	GO:0002697	regulation of immune effector process	19_GO:0002376 immune system process	-4	2.8	4.7	30182	384	502	18	3.6	0.83	54|966|1379|1773|2242|2268|2302|2529|2624|3142|3662|3902|5170|7186|7855|10225|26191|124626	ACP5|CD59|CR1L|DNASE1|FES|FGR|FOXJ1|FUT7|GATA2|HLX|IRF4|LAG3|PDPK1|TRAF2|FZD5|CD96|PTPN22|ZPBP2	-2.4	MyList
KEGG Pathway	24	hsa05010	Alzheimer disease		-4	2.8	4.7	30182	384	502	18	3.6	0.83	489|810|1339|3845|4728|5710|7186|7384|7855|7976|8321|8326|8660|10023|11211|51806|55626|84617	ATP2A3|CALML3|COX6A2|KRAS|NDUFS8|PSMD4|TRAF2|UQCRC1|FZD5|FZD3|FZD1|FZD9|IRS2|FRAT1|FZD10|CALML5|AMBRA1|TUBB6	-2.4	MyList
GO Biological Processes	19	GO:0048864	stem cell development	19_GO:0032502 developmental process	-4	5.6	5.5	30182	86	502	8	1.6	0.56	596|2296|4902|6469|8828|30812|54910|64218	BCL2|FOXC1|NRTN|SHH|NRP2|SOX8|SEMA4C|SEMA4A	-2.4	MyList
GO Biological Processes	19	GO:0048754	branching morphogenesis of an epithelial tube	19_GO:0032502 developmental process	-4	4.4	5.2	30182	137	502	10	2	0.62	596|780|1522|3202|3845|4323|6469|9620|10672|80004	BCL2|DDR1|CTSZ|HOXA5|KRAS|MMP14|SHH|CELSR1|GNA13|ESRP2	-2.4	MyList
Reactome Gene Sets	6	R-HSA-1280215	Cytokine Signaling in Immune system		-4	2.2	4.4	30182	730	502	27	5.4	1	302|596|1440|3587|3656|3662|3841|3845|3932|3976|5008|5606|5710|5711|7186|7311|8353|8660|8771|9180|9830|10410|23650|79792|115650|387522|414062	ANXA2|BCL2|CSF3|IL10RA|IRAK2|IRF4|KPNA5|KRAS|LCK|LIF|OSM|MAP2K3|PSMD4|PSMD5|TRAF2|UBA52|H3C6|IRS2|TNFRSF6B|OSMR|TRIM14|IFITM3|TRIM29|GSDMD|TNFRSF13C|PEDS1-UBE2V1|CCL3L3	-2.4	MyList
GO Biological Processes	19	GO:0001892	embryonic placenta development	19_GO:0032502 developmental process	-4	5.5	5.5	30182	88	502	8	1.6	0.56	2034|2624|3976|7855|10049|22846|79893|79977	EPAS1|GATA2|LIF|FZD5|DNAJB6|VASH1|GGNBP2|GRHL2	-2.4	MyList
GO Biological Processes	19	GO:0008544	epidermis development	19_GO:0032502 developmental process	-3.9	3	4.7	30182	322	502	16	3.2	0.78	224|596|3852|3872|3925|5339|5493|6469|6701|7357|7976|11166|51806|55366|79755|79977	ALDH3A2|BCL2|KRT5|KRT17|STMN1|PLEC|PPL|SHH|SPRR2B|UGCG|FZD3|SOX21|CALML5|LGR4|ZNF750|GRHL2	-2.4	MyList
GO Biological Processes	19	GO:0001667	ameboidal-type cell migration	19_GO:0009987 cellular process	-3.9	3.7	4.9	30182	197	502	12	2.4	0.68	4902|5339|6286|6469|8660|8828|29941|30812|54443|54910|64218|116844	NRTN|PLEC|S100P|SHH|IRS2|NRP2|PKN3|SOX8|ANLN|SEMA4C|SEMA4A|LRG1	-2.3	MyList
GO Biological Processes	19	GO:0032388	positive regulation of intracellular transport	19_GO:0051179 localization	-3.9	3.7	4.9	30182	197	502	12	2.4	0.68	302|5621|5901|6469|6794|7855|9531|10938|50632|51201|79752|118424	ANXA2|PRNP|RAN|SHH|STK11|FZD5|BAG3|EHD1|CALY|ZDHHC2|ZFAND1|UBE2J2	-2.3	MyList
GO Biological Processes	19	GO:0098771	inorganic ion homeostasis	19_GO:0042592 homeostatic process	-3.9	2.6	4.5	30182	433	502	19	3.8	0.85	368|489|596|664|858|1815|1991|2034|3074|3932|4241|5621|6387|8326|9256|10723|27185|57468|66002	ABCC6|ATP2A3|BCL2|BNIP3|CAV2|DRD4|ELANE|EPAS1|HEXB|LCK|MELTF|PRNP|CXCL12|FZD9|TSPOAP1|SLC12A7|DISC1|SLC12A5|CYP4F12	-2.3	MyList
GO Biological Processes	19	GO:0045104	intermediate filament cytoskeleton organization	19_GO:0009987 cellular process	-3.9	5.3	5.3	30182	91	502	8	1.6	0.56	3852|3872|3883|5339|5493|6469|10049|286077	KRT5|KRT17|KRT33A|PLEC|PPL|SHH|DNAJB6|FAM83H	-2.3	MyList
KEGG Pathway	24	hsa04550	Signaling pathways regulating pluripotency of stem cells		-3.8	4.2	5	30182	143	502	10	2	0.62	3845|3976|6300|7044|7855|7976|8321|8326|9869|11211	KRAS|LIF|MAPK12|LEFTY2|FZD5|FZD3|FZD1|FZD9|SETDB1|FZD10	-2.3	MyList
GO Biological Processes	19	GO:1903236	regulation of leukocyte tethering or rolling	19_GO:0040011 locomotion	-3.8	14	7.1	30182	17	502	4	0.8	0.4	1991|2526|2529|6387	ELANE|FUT4|FUT7|CXCL12	-2.3	MyList
Reactome Gene Sets	6	R-HSA-449147	Signaling by Interleukins		-3.8	2.5	4.4	30182	473	502	20	4	0.87	302|596|1440|3587|3656|3662|3932|3976|5008|5606|5710|5711|7186|7311|8353|8660|9180|79792|387522|414062	ANXA2|BCL2|CSF3|IL10RA|IRAK2|IRF4|LCK|LIF|OSM|MAP2K3|PSMD4|PSMD5|TRAF2|UBA52|H3C6|IRS2|OSMR|GSDMD|PEDS1-UBE2V1|CCL3L3	-2.3	MyList
GO Biological Processes	19	GO:0045103	intermediate filament-based process	19_GO:0009987 cellular process	-3.8	5.2	5.3	30182	92	502	8	1.6	0.56	3852|3872|3883|5339|5493|6469|10049|286077	KRT5|KRT17|KRT33A|PLEC|PPL|SHH|DNAJB6|FAM83H	-2.3	MyList
GO Biological Processes	19	GO:0060463	lung lobe morphogenesis	19_GO:0032502 developmental process	-3.8	26	8.5	30182	7	502	3	0.6	0.34	3976|6469|79977	LIF|SHH|GRHL2	-2.3	MyList
GO Biological Processes	19	GO:0060462	lung lobe development	19_GO:0032502 developmental process	-3.8	26	8.5	30182	7	502	3	0.6	0.34	3976|6469|79977	LIF|SHH|GRHL2	-2.3	MyList
GO Biological Processes	19	GO:0006979	response to oxidative stress	19_GO:0050896 response to stimulus	-3.8	2.8	4.5	30182	366	502	17	3.4	0.81	328|596|664|2034|4323|4728|4780|4968|5621|6414|6780|7001|10645|51157|79661|93100|133522	APEX1|BCL2|BNIP3|EPAS1|MMP14|NDUFS8|NFE2L2|OGG1|PRNP|SELENOP|STAU1|PRDX2|CAMKK2|ZNF580|NEIL1|NAPRT|PPARGC1B	-2.3	MyList
Reactome Gene Sets	6	R-HSA-422475	Axon guidance		-3.8	2.4	4.3	30182	553	502	22	4.4	0.91	389|1299|2242|2935|3199|3845|4902|5621|5710|5711|5909|6207|6300|6387|7311|8660|8828|9855|56963|64218|84617|116986	RHOC|COL9A3|FES|GSPT1|HOXA2|KRAS|NRTN|PRNP|PSMD4|PSMD5|RAP1GAP|RPS13|MAPK12|CXCL12|UBA52|IRS2|NRP2|FARP2|RGMA|SEMA4A|TUBB6|AGAP2	-2.2	MyList
GO Biological Processes	19	GO:0014855	striated muscle cell proliferation	19_GO:0009987 cellular process	-3.8	9.4	6.2	30182	32	502	5	1	0.44	858|1525|2242|2296|6469	CAV2|CXADR|FES|FOXC1|SHH	-2.2	MyList
GO Biological Processes	19	GO:0045581	negative regulation of T cell differentiation	19_GO:0002376 immune system process	-3.8	7.2	5.7	30182	50	502	6	1.2	0.49	1493|2302|3142|3902|6469|7001	CTLA4|FOXJ1|HLX|LAG3|SHH|PRDX2	-2.2	MyList
GO Biological Processes	19	GO:0046632	alpha-beta T cell differentiation	19_GO:0002376 immune system process	-3.7	5.9	5.4	30182	71	502	7	1.4	0.52	596|2529|2841|3142|3662|6469|64218	BCL2|FUT7|GPR18|HLX|IRF4|SHH|SEMA4A	-2.2	MyList
KEGG Pathway	24	hsa05226	Gastric cancer		-3.7	4	4.8	30182	149	502	10	2	0.62	596|3845|6469|7855|7976|8321|8326|10023|11211|399694	BCL2|KRAS|SHH|FZD5|FZD3|FZD1|FZD9|FRAT1|FZD10|SHC4	-2.2	MyList
GO Biological Processes	19	GO:0007517	muscle organ development	19_GO:0032502 developmental process	-3.7	2.9	4.4	30182	307	502	15	3	0.76	596|858|2296|3142|3845|3976|5081|5339|6300|6469|8321|30008|30812|57496|80208	BCL2|CAV2|FOXC1|HLX|KRAS|LIF|PAX7|PLEC|MAPK12|SHH|FZD1|EFEMP2|SOX8|MRTFB|SPG11	-2.2	MyList
GO Biological Processes	19	GO:0016567	protein ubiquitination	19_GO:0008152 metabolic process	-3.6	2.2	4.1	30182	682	502	25	5	0.97	596|672|2178|4780|7186|7311|9830|10277|25879|29945|54476|55626|57799|64207|64326|64777|79016|80352|81844|118424|122769|147040|199990|255488|284023	BCL2|BRCA1|FANCE|NFE2L2|TRAF2|UBA52|TRIM14|UBE4B|DCAF13|ANAPC4|RNF216|AMBRA1|RAB40C|IRF2BPL|COP1|RMND5B|DDA1|RNF39|TRIM56|UBE2J2|LRR1|KCTD11|FAAP20|RNF144B|RNF227	-2.2	MyList
GO Biological Processes	19	GO:0001944	vasculature development	19_GO:0032502 developmental process	-3.6	2.4	4.2	30182	526	502	21	4.2	0.89	302|682|2034|2296|2624|3213|3976|4323|6469|6794|7010|7127|7855|8828|9289|10672|22846|30008|54538|64218|79893	ANXA2|BSG|EPAS1|FOXC1|GATA2|HOXB3|LIF|MMP14|SHH|STK11|TEK|TNFAIP2|FZD5|NRP2|ADGRG1|GNA13|VASH1|EFEMP2|ROBO4|SEMA4A|GGNBP2	-2.1	MyList
GO Biological Processes	19	GO:1903037	regulation of leukocyte cell-cell adhesion	19_GO:0050789 regulation of biological process	-3.6	2.7	4.3	30182	378	502	17	3.4	0.81	1493|1725|1991|2302|2526|2529|3142|3902|3932|5621|6387|6469|7001|26191|55626|115650|283234	CTLA4|DHPS|ELANE|FOXJ1|FUT4|FUT7|HLX|LAG3|LCK|PRNP|CXCL12|SHH|PRDX2|PTPN22|AMBRA1|TNFRSF13C|CCDC88B	-2.1	MyList
GO Biological Processes	19	GO:0045216	cell-cell junction organization	19_GO:0009987 cellular process	-3.6	3.7	4.7	30182	180	502	11	2.2	0.65	389|1525|3987|5339|9788|11187|57555|64065|79977|125111|137075	RHOC|CXADR|LIMS1|PLEC|MTSS1|PKP3|NLGN2|PERP|GRHL2|GJD3|CLDN23	-2.1	MyList
GO Biological Processes	19	GO:0030162	regulation of proteolysis	19_GO:0008152 metabolic process	-3.6	2.2	4.1	30182	726	502	26	5.2	0.99	302|489|1522|1992|3932|4241|4323|4780|5176|5271|5447|5621|5886|6300|6469|6815|10049|27141|27185|55486|56963|64065|64326|79016|84871|255488	ANXA2|ATP2A3|CTSZ|SERPINB1|LCK|MELTF|MMP14|NFE2L2|SERPINF1|SERPINB8|POR|PRNP|RAD23A|MAPK12|SHH|STYX|DNAJB6|CIDEB|DISC1|PARL|RGMA|PERP|COP1|DDA1|AGBL4|RNF144B	-2.1	MyList
GO Biological Processes	19	GO:0007169	transmembrane receptor protein tyrosine kinase signaling pathway	19_GO:0023052 signaling	-3.6	2.6	4.3	30182	416	502	18	3.6	0.83	780|858|925|2268|2296|3925|3932|4486|4902|5170|5753|7010|8660|8828|9788|56899|284948|399694	DDR1|CAV2|CD8A|FGR|FOXC1|STMN1|LCK|MST1R|NRTN|PDPK1|PTK6|TEK|IRS2|NRP2|MTSS1|ANKS1B|SH2D6|SHC4	-2.1	MyList
GO Biological Processes	19	GO:0050900	leukocyte migration	19_GO:0002376 immune system process	-3.6	3.2	4.5	30182	244	502	13	2.6	0.71	566|682|1525|1991|2302|2526|2529|3683|3932|5339|9023|124976|414062	AZU1|BSG|CXADR|ELANE|FOXJ1|FUT4|FUT7|ITGAL|LCK|PLEC|CH25H|SPNS2|CCL3L3	-2.1	MyList
GO Biological Processes	19	GO:0050767	regulation of neurogenesis	19_GO:0032502 developmental process	-3.6	2.7	4.3	30182	381	502	17	3.4	0.81	302|2624|3213|3845|3976|5176|6387|6469|6794|6993|7976|27185|29956|30812|54626|54910|64218	ANXA2|GATA2|HOXB3|KRAS|LIF|SERPINF1|CXCL12|SHH|STK11|DYNLT1|FZD3|DISC1|CERS2|SOX8|HES2|SEMA4C|SEMA4A	-2.1	MyList
GO Biological Processes	19	GO:0050678	regulation of epithelial cell proliferation	19_GO:0050789 regulation of biological process	-3.6	2.6	4.2	30182	419	502	18	3.6	0.83	858|2624|3142|3202|5170|5176|5909|6387|6469|6794|7010|8660|8828|9788|22846|51157|80004|116844	CAV2|GATA2|HLX|HOXA5|PDPK1|SERPINF1|RAP1GAP|CXCL12|SHH|STK11|TEK|IRS2|NRP2|MTSS1|VASH1|ZNF580|ESRP2|LRG1	-2.1	MyList
GO Biological Processes	19	GO:0043550	regulation of lipid kinase activity	19_GO:0008152 metabolic process	-3.6	6.7	5.4	30182	54	502	6	1.2	0.49	1917|2268|7010|55626|116986|124997	EEF1A2|FGR|TEK|AMBRA1|AGAP2|WDR81	-2.1	MyList
GO Biological Processes	19	GO:0035567	non-canonical Wnt signaling pathway	19_GO:0023052 signaling	-3.6	6.7	5.4	30182	54	502	6	1.2	0.49	7855|7976|8321|8326|9620|11211	FZD5|FZD3|FZD1|FZD9|CELSR1|FZD10	-2.1	MyList
GO Biological Processes	19	GO:0030098	lymphocyte differentiation	19_GO:0002376 immune system process	-3.6	3	4.4	30182	280	502	14	2.8	0.73	596|925|2529|2841|3142|3662|3932|6469|6794|7855|8326|23228|26191|64218	BCL2|CD8A|FUT7|GPR18|HLX|IRF4|LCK|SHH|STK11|FZD5|FZD9|PLCL2|PTPN22|SEMA4A	-2.1	MyList
GO Biological Processes	19	GO:0019725	cellular homeostasis	19_GO:0042592 homeostatic process	-3.6	2.2	4.1	30182	652	502	24	4.8	0.95	328|368|489|596|664|858|1815|1991|2645|3074|3932|4780|5176|5621|6387|7001|7776|8326|8660|9256|9531|10723|27185|57468	APEX1|ABCC6|ATP2A3|BCL2|BNIP3|CAV2|DRD4|ELANE|GCK|HEXB|LCK|NFE2L2|SERPINF1|PRNP|CXCL12|PRDX2|ZNF236|FZD9|IRS2|TSPOAP1|BAG3|SLC12A7|DISC1|SLC12A5	-2.1	MyList
GO Biological Processes	19	GO:0048514	blood vessel morphogenesis	19_GO:0032502 developmental process	-3.5	2.6	4.2	30182	422	502	18	3.6	0.83	302|682|2034|2296|2624|3213|4323|6469|7010|7127|7855|8828|9289|10672|22846|30008|54538|64218	ANXA2|BSG|EPAS1|FOXC1|GATA2|HOXB3|MMP14|SHH|TEK|TNFAIP2|FZD5|NRP2|ADGRG1|GNA13|VASH1|EFEMP2|ROBO4|SEMA4A	-2.1	MyList
KEGG Pathway	24	hsa04916	Melanogenesis		-3.5	4.8	4.9	30182	101	502	8	1.6	0.56	810|3845|7855|7976|8321|8326|11211|51806	CALML3|KRAS|FZD5|FZD3|FZD1|FZD9|FZD10|CALML5	-2.1	MyList
GO Biological Processes	19	GO:0051960	regulation of nervous system development	19_GO:0032502 developmental process	-3.5	2.5	4.2	30182	461	502	19	3.8	0.85	302|2624|3213|3845|3976|5176|6387|6469|6794|6993|7976|27185|29956|30812|54626|54910|57555|64218|441381	ANXA2|GATA2|HOXB3|KRAS|LIF|SERPINF1|CXCL12|SHH|STK11|DYNLT1|FZD3|DISC1|CERS2|SOX8|HES2|SEMA4C|NLGN2|SEMA4A|LRRC24	-2.1	MyList
GO Biological Processes	19	GO:0090218	positive regulation of lipid kinase activity	19_GO:0048518 positive regulation of biological process	-3.5	8.4	5.7	30182	36	502	5	1	0.44	1917|2268|7010|55626|116986	EEF1A2|FGR|TEK|AMBRA1|AGAP2	-2.1	MyList
Reactome Gene Sets	6	R-HSA-9675108	Nervous system development		-3.5	2.3	4.1	30182	578	502	22	4.4	0.91	389|1299|2242|2935|3199|3845|4902|5621|5710|5711|5909|6207|6300|6387|7311|8660|8828|9855|56963|64218|84617|116986	RHOC|COL9A3|FES|GSPT1|HOXA2|KRAS|NRTN|PRNP|PSMD4|PSMD5|RAP1GAP|RPS13|MAPK12|CXCL12|UBA52|IRS2|NRP2|FARP2|RGMA|SEMA4A|TUBB6|AGAP2	-2	MyList
GO Biological Processes	19	GO:0072676	lymphocyte migration	19_GO:0002376 immune system process	-3.5	5.4	5.1	30182	78	502	7	1.4	0.52	2526|2529|3683|5339|9023|124976|414062	FUT4|FUT7|ITGAL|PLEC|CH25H|SPNS2|CCL3L3	-2	MyList
GO Biological Processes	19	GO:0032835	glomerulus development	19_GO:0032502 developmental process	-3.5	6.4	5.3	30182	56	502	6	1.2	0.49	596|2296|2302|7010|9788|55366	BCL2|FOXC1|FOXJ1|TEK|MTSS1|LGR4	-2	MyList
GO Biological Processes	19	GO:0001755	neural crest cell migration	19_GO:0032502 developmental process	-3.5	6.4	5.3	30182	56	502	6	1.2	0.49	4902|6469|8828|30812|54910|64218	NRTN|SHH|NRP2|SOX8|SEMA4C|SEMA4A	-2	MyList
Reactome Gene Sets	6	R-HSA-109582	Hemostasis		-3.5	2.2	4	30182	621	502	23	4.6	0.93	1|302|489|682|1525|2268|2624|3683|3832|3845|3932|5170|5271|5624|6414|7010|7044|7465|8353|10257|10672|10938|84617	A1BG|ANXA2|ATP2A3|BSG|CXADR|FGR|GATA2|ITGAL|KIF11|KRAS|LCK|PDPK1|SERPINB8|PROC|SELENOP|TEK|LEFTY2|WEE1|H3C6|ABCC4|GNA13|EHD1|TUBB6	-2	MyList
GO Biological Processes	19	GO:0061061	muscle structure development	19_GO:0032502 developmental process	-3.5	2.4	4.1	30182	504	502	20	4	0.87	596|858|1525|2034|2296|3142|3199|3845|3976|5081|5339|6300|6469|8321|30008|30812|54910|57496|64236|80208	BCL2|CAV2|CXADR|EPAS1|FOXC1|HLX|HOXA2|KRAS|LIF|PAX7|PLEC|MAPK12|SHH|FZD1|EFEMP2|SOX8|SEMA4C|MRTFB|PDLIM2|SPG11	-2	MyList
GO Biological Processes	19	GO:0045746	negative regulation of Notch signaling pathway	19_GO:0023052 signaling	-3.5	8.1	5.6	30182	37	502	5	1	0.44	1018|2624|4323|8788|64855	CDK3|GATA2|MMP14|DLK1|NIBAN2	-2	MyList
GO Biological Processes	19	GO:1903146	regulation of autophagy of mitochondrion	19_GO:0008152 metabolic process	-3.5	8.1	5.6	30182	37	502	5	1	0.44	664|7855|10645|55486|55626	BNIP3|FZD5|CAMKK2|PARL|AMBRA1	-2	MyList
GO Biological Processes	19	GO:0051129	negative regulation of cellular component organization	19_GO:0048519 negative regulation of biological process	-3.5	2.1	4	30182	703	502	25	5	0.97	302|664|672|2672|3925|3976|4043|4323|5621|5909|8326|9023|10049|10498|29956|50853|54910|55486|56937|56963|64218|80119|84464|157285|339345	ANXA2|BNIP3|BRCA1|GFI1|STMN1|LIF|LRPAP1|MMP14|PRNP|RAP1GAP|FZD9|CH25H|DNAJB6|CARM1|CERS2|VILL|SEMA4C|PARL|PMEPA1|RGMA|SEMA4A|PIF1|SLX4|PRAG1|NANOS2	-2	MyList
Reactome Gene Sets	6	R-HSA-110357	Displacement of DNA glycosylase by APEX1		-3.4	20	7.4	30182	9	502	3	0.6	0.34	328|4350|4968	APEX1|MPG|OGG1	-2	MyList
GO Biological Processes	19	GO:0060767	epithelial cell proliferation involved in prostate gland development	19_GO:0022414 reproductive process	-3.4	20	7.4	30182	9	502	3	0.6	0.34	5176|6469|6794	SERPINF1|SHH|STK11	-2	MyList
GO Biological Processes	19	GO:0007350	blastoderm segmentation	19_GO:0032502 developmental process	-3.4	11	6.2	30182	21	502	4	0.8	0.4	6469|7855|8828|201164	SHH|FZD5|NRP2|PLD6	-2	MyList
GO Biological Processes	19	GO:0014032	neural crest cell development	19_GO:0032502 developmental process	-3.4	5.3	5	30182	80	502	7	1.4	0.52	2296|4902|6469|8828|30812|54910|64218	FOXC1|NRTN|SHH|NRP2|SOX8|SEMA4C|SEMA4A	-2	MyList
GO Biological Processes	19	GO:0007167	enzyme-linked receptor protein signaling pathway	19_GO:0023052 signaling	-3.4	2.2	4	30182	626	502	23	4.6	0.93	780|858|925|2268|2296|3925|3932|3976|4486|4879|4902|5170|5753|7010|7044|8660|8828|9180|9788|56899|56963|284948|399694	DDR1|CAV2|CD8A|FGR|FOXC1|STMN1|LCK|LIF|MST1R|NPPB|NRTN|PDPK1|PTK6|TEK|LEFTY2|IRS2|NRP2|OSMR|MTSS1|ANKS1B|RGMA|SH2D6|SHC4	-2	MyList
GO Biological Processes	19	GO:1903131	mononuclear cell differentiation	19_GO:0032502 developmental process	-3.4	2.8	4.2	30182	324	502	15	3	0.76	596|925|2529|2841|3142|3662|3932|4772|6469|6794|7855|8326|23228|26191|64218	BCL2|CD8A|FUT7|GPR18|HLX|IRF4|LCK|NFATC1|SHH|STK11|FZD5|FZD9|PLCL2|PTPN22|SEMA4A	-2	MyList
GO Biological Processes	19	GO:0090497	mesenchymal cell migration	19_GO:0009987 cellular process	-3.4	6.2	5.2	30182	58	502	6	1.2	0.49	4902|6469|8828|30812|54910|64218	NRTN|SHH|NRP2|SOX8|SEMA4C|SEMA4A	-2	MyList
Reactome Gene Sets	6	R-HSA-1236394	Signaling by ERBB4		-3.4	6.2	5.2	30182	58	502	6	1.2	0.49	3845|3925|6387|7311|9611|11033	KRAS|STMN1|CXCL12|UBA52|NCOR1|ADAP1	-2	MyList
GO Biological Processes	19	GO:0022404	molting cycle process	19_GO:0032501 multicellular organismal process	-3.4	5.2	4.9	30182	81	502	7	1.4	0.52	596|3872|6469|7976|9855|11166|55366	BCL2|KRT17|SHH|FZD3|FARP2|SOX21|LGR4	-2	MyList
GO Biological Processes	19	GO:0022405	hair cycle process	19_GO:0032501 multicellular organismal process	-3.4	5.2	4.9	30182	81	502	7	1.4	0.52	596|3872|6469|7976|9855|11166|55366	BCL2|KRT17|SHH|FZD3|FARP2|SOX21|LGR4	-2	MyList
GO Biological Processes	19	GO:0050679	positive regulation of epithelial cell proliferation	19_GO:0048518 positive regulation of biological process	-3.4	3.2	4.3	30182	225	502	12	2.4	0.68	858|2624|3142|5170|6387|6469|7010|8660|8828|51157|80004|116844	CAV2|GATA2|HLX|PDPK1|CXCL12|SHH|TEK|IRS2|NRP2|ZNF580|ESRP2|LRG1	-2	MyList
GO Biological Processes	19	GO:0055074	calcium ion homeostasis	19_GO:0042592 homeostatic process	-3.4	3.2	4.3	30182	225	502	12	2.4	0.68	368|489|596|664|858|1815|1991|3074|6387|8326|9256|27185	ABCC6|ATP2A3|BCL2|BNIP3|CAV2|DRD4|ELANE|HEXB|CXCL12|FZD9|TSPOAP1|DISC1	-2	MyList
Reactome Gene Sets	6	R-HSA-9609523	Insertion of tail-anchored proteins into the endoplasmic reticulum membrane		-3.4	11	6.1	30182	22	502	4	0.8	0.4	224|439|5621|118424	ALDH3A2|GET3|PRNP|UBE2J2	-2	MyList
GO Biological Processes	19	GO:0032446	protein modification by small protein conjugation	19_GO:0008152 metabolic process	-3.4	2.1	3.9	30182	756	502	26	5.2	0.99	596|672|2178|4780|7186|7311|9830|10277|23137|25879|29945|54476|55626|57799|64207|64326|64777|79016|80352|81844|118424|122769|147040|199990|255488|284023	BCL2|BRCA1|FANCE|NFE2L2|TRAF2|UBA52|TRIM14|UBE4B|SMC5|DCAF13|ANAPC4|RNF216|AMBRA1|RAB40C|IRF2BPL|COP1|RMND5B|DDA1|RNF39|TRIM56|UBE2J2|LRR1|KCTD11|FAAP20|RNF144B|RNF227	-2	MyList
GO Biological Processes	19	GO:0045862	positive regulation of proteolysis	19_GO:0048518 positive regulation of biological process	-3.3	2.6	4.1	30182	365	502	16	3.2	0.78	302|489|3932|4241|4323|4780|5886|6300|27141|27185|56963|64065|64326|79016|84871|255488	ANXA2|ATP2A3|LCK|MELTF|MMP14|NFE2L2|RAD23A|MAPK12|CIDEB|DISC1|RGMA|PERP|COP1|DDA1|AGBL4|RNF144B	-1.9	MyList
GO Biological Processes	19	GO:0045620	negative regulation of lymphocyte differentiation	19_GO:0002376 immune system process	-3.3	6	5.1	30182	60	502	6	1.2	0.49	1493|2302|3142|3902|6469|7001	CTLA4|FOXJ1|HLX|LAG3|SHH|PRDX2	-1.9	MyList
GO Biological Processes	19	GO:0032386	regulation of intracellular transport	19_GO:0051179 localization	-3.3	2.7	4.1	30182	332	502	15	3	0.76	302|5621|5901|6469|6794|7855|9531|10023|10079|10938|50632|51201|55486|79752|118424	ANXA2|PRNP|RAN|SHH|STK11|FZD5|BAG3|FRAT1|ATP9A|EHD1|CALY|ZDHHC2|PARL|ZFAND1|UBE2J2	-1.9	MyList
GO Biological Processes	19	GO:0060768	regulation of epithelial cell proliferation involved in prostate gland development	19_GO:0022414 reproductive process	-3.3	18	7	30182	10	502	3	0.6	0.34	5176|6469|6794	SERPINF1|SHH|STK11	-1.9	MyList
GO Biological Processes	19	GO:1900120	regulation of receptor binding	19_GO:0065007 biological regulation	-3.3	10	5.9	30182	23	502	4	0.8	0.4	302|489|23228|56963	ANXA2|ATP2A3|PLCL2|RGMA	-1.9	MyList
GO Biological Processes	19	GO:0002070	epithelial cell maturation	19_GO:0032502 developmental process	-3.3	10	5.9	30182	23	502	4	0.8	0.4	2034|2624|3202|7855	EPAS1|GATA2|HOXA5|FZD5	-1.9	MyList
GO Biological Processes	19	GO:0045785	positive regulation of cell adhesion	19_GO:0048518 positive regulation of biological process	-3.3	2.4	3.9	30182	482	502	19	3.8	0.85	566|1725|1991|2526|2529|3142|3932|3976|3987|6387|6469|7010|9289|26191|27185|30008|55626|115650|283234	AZU1|DHPS|ELANE|FUT4|FUT7|HLX|LCK|LIF|LIMS1|CXCL12|SHH|TEK|ADGRG1|PTPN22|DISC1|EFEMP2|AMBRA1|TNFRSF13C|CCDC88B	-1.9	MyList
GO Biological Processes	19	GO:0006874	cellular calcium ion homeostasis	19_GO:0042592 homeostatic process	-3.3	3.3	4.3	30182	199	502	11	2.2	0.65	489|596|664|858|1815|1991|3074|6387|8326|9256|27185	ATP2A3|BCL2|BNIP3|CAV2|DRD4|ELANE|HEXB|CXCL12|FZD9|TSPOAP1|DISC1	-1.9	MyList
GO Biological Processes	19	GO:0009895	negative regulation of catabolic process	19_GO:0048519 negative regulation of biological process	-3.3	2.7	4.1	30182	335	502	15	3	0.76	302|596|1149|1153|3587|6469|6815|7186|9611|11187|25819|26191|55603|115572|116986	ANXA2|BCL2|CIDEA|CIRBP|IL10RA|SHH|STYX|TRAF2|NCOR1|PKP3|NOCT|PTPN22|TENT5A|TENT5B|AGAP2	-1.9	MyList
Reactome Gene Sets	6	R-HSA-9006934	Signaling by Receptor Tyrosine Kinases		-3.2	2.3	3.9	30182	524	502	20	4	0.87	1299|2242|3845|3925|3932|4486|5170|5433|5753|5867|6300|6387|7311|8660|8828|9611|11033|23237|58513|80004	COL9A3|FES|KRAS|STMN1|LCK|MST1R|PDPK1|POLR2D|PTK6|RAB4A|MAPK12|CXCL12|UBA52|IRS2|NRP2|NCOR1|ADAP1|ARC|EPS15L1|ESRP2	-1.9	MyList
Reactome Gene Sets	6	R-HSA-73894	DNA Repair		-3.2	2.7	4	30182	336	502	15	3	0.76	328|672|2178|3018|4350|4968|5433|5536|5886|7311|7517|79661|84464|151987|199990	APEX1|BRCA1|FANCE|H2BC3|MPG|OGG1|POLR2D|PPP5C|RAD23A|UBA52|XRCC3|NEIL1|SLX4|PPP4R2|FAAP20	-1.9	MyList
GO Biological Processes	19	GO:0033002	muscle cell proliferation	19_GO:0009987 cellular process	-3.2	7.3	5.3	30182	41	502	5	1	0.44	858|1525|2242|2296|6469	CAV2|CXADR|FES|FOXC1|SHH	-1.9	MyList
Reactome Gene Sets	6	R-HSA-1280218	Adaptive Immune System		-3.2	2	3.8	30182	769	502	26	5.2	0.99	925|1493|1525|1780|3683|3832|3845|3902|3932|4772|5170|5493|5710|5711|5909|7311|10225|26191|29945|56654|84617|90135|118424|122769|255488|387522	CD8A|CTLA4|CXADR|DYNC1I1|ITGAL|KIF11|KRAS|LAG3|LCK|NFATC1|PDPK1|PPL|PSMD4|PSMD5|RAP1GAP|UBA52|CD96|PTPN22|ANAPC4|NPDC1|TUBB6|BTBD6|UBE2J2|LRR1|RNF144B|PEDS1-UBE2V1	-1.9	MyList
GO Biological Processes	19	GO:0120035	regulation of plasma membrane bounded cell projection organization	19_GO:0050789 regulation of biological process	-3.2	2.1	3.8	30182	645	502	23	4.6	0.93	780|2242|2672|4780|5176|5337|5621|5753|5909|6387|6794|8321|10498|10938|23237|27185|29956|49856|54443|54910|56963|64218|157285	DDR1|FES|GFI1|NFE2L2|SERPINF1|PLD1|PRNP|PTK6|RAP1GAP|CXCL12|STK11|FZD1|CARM1|EHD1|ARC|DISC1|CERS2|WRAP73|ANLN|SEMA4C|RGMA|SEMA4A|PRAG1	-1.9	MyList
GO Biological Processes	19	GO:0006468	protein phosphorylation	19_GO:0008152 metabolic process	-3.2	2.1	3.8	30182	686	502	24	4.8	0.95	596|780|1018|2242|2268|3656|3932|3976|4486|5170|5606|5753|6300|6794|7010|7465|8711|9088|10645|29941|57410|140803|157285|728642	BCL2|DDR1|CDK3|FES|FGR|IRAK2|LCK|LIF|MST1R|PDPK1|MAP2K3|PTK6|MAPK12|STK11|TEK|WEE1|TNK1|PKMYT1|CAMKK2|PKN3|SCYL1|TRPM6|PRAG1|CDK11A	-1.9	MyList
GO Biological Processes	19	GO:0021954	central nervous system neuron development	19_GO:0032502 developmental process	-3.2	4.9	4.7	30182	86	502	7	1.4	0.52	2624|8828|26468|27185|80208|84871|113246	GATA2|NRP2|LHX6|DISC1|SPG11|AGBL4|C12orf57	-1.9	MyList
KEGG Pathway	24	hsa04310	Wnt signaling pathway		-3.2	3.5	4.3	30182	170	502	10	2	0.62	4772|5176|7855|7976|8321|8326|10023|11211|55366|147111	NFATC1|SERPINF1|FZD5|FZD3|FZD1|FZD9|FRAT1|FZD10|LGR4|NOTUM	-1.9	MyList
GO Biological Processes	19	GO:0048568	embryonic organ development	19_GO:0032502 developmental process	-3.2	2.4	3.9	30182	450	502	18	3.6	0.83	2034|2296|2299|2624|3142|3199|3202|3213|3976|4323|6469|7855|7976|10049|22846|23059|79893|79977	EPAS1|FOXC1|FOXI1|GATA2|HLX|HOXA2|HOXA5|HOXB3|LIF|MMP14|SHH|FZD5|FZD3|DNAJB6|VASH1|CLUAP1|GGNBP2|GRHL2	-1.9	MyList
GO Biological Processes	19	GO:1901863	positive regulation of muscle tissue development	19_GO:0032502 developmental process	-3.2	10	5.7	30182	24	502	4	0.8	0.4	596|6469|57496|64855	BCL2|SHH|MRTFB|NIBAN2	-1.9	MyList
Reactome Gene Sets	6	R-HSA-450302	activated TAK1 mediates p38 MAPK activation		-3.2	10	5.7	30182	24	502	4	0.8	0.4	3656|5606|7311|387522	IRAK2|MAP2K3|UBA52|PEDS1-UBE2V1	-1.9	MyList
KEGG Pathway	24	hsa05217	Basal cell carcinoma		-3.2	5.7	4.9	30182	63	502	6	1.2	0.49	6469|7855|7976|8321|8326|11211	SHH|FZD5|FZD3|FZD1|FZD9|FZD10	-1.9	MyList
GO Biological Processes	19	GO:0043588	skin development	19_GO:0032502 developmental process	-3.2	2.9	4.1	30182	269	502	13	2.6	0.71	596|3852|3872|3925|5339|5493|6469|6701|7357|7976|9509|11166|55366	BCL2|KRT5|KRT17|STMN1|PLEC|PPL|SHH|SPRR2B|UGCG|FZD3|ADAMTS2|SOX21|LGR4	-1.9	MyList
GO Biological Processes	19	GO:0043551	regulation of phosphatidylinositol 3-kinase activity	19_GO:0008152 metabolic process	-3.2	7.2	5.2	30182	42	502	5	1	0.44	2268|7010|55626|116986|124997	FGR|TEK|AMBRA1|AGAP2|WDR81	-1.8	MyList
GO Biological Processes	19	GO:0051345	positive regulation of hydrolase activity	19_GO:0065007 biological regulation	-3.2	2.2	3.8	30182	569	502	21	4.2	0.89	389|489|858|2302|3932|3987|5170|5909|6300|9649|10672|11033|11211|23216|27141|56963|64065|116986|133522|161514|414062	RHOC|ATP2A3|CAV2|FOXJ1|LCK|LIMS1|PDPK1|RAP1GAP|MAPK12|RALGPS1|GNA13|ADAP1|FZD10|TBC1D1|CIDEB|RGMA|PERP|AGAP2|PPARGC1B|TBC1D21|CCL3L3	-1.8	MyList
GO Biological Processes	19	GO:0010975	regulation of neuron projection development	19_GO:0032502 developmental process	-3.2	2.4	3.9	30182	452	502	18	3.6	0.83	780|2242|2672|4780|5176|5753|6387|6794|8321|10498|10938|23237|27185|29956|54910|56963|64218|157285	DDR1|FES|GFI1|NFE2L2|SERPINF1|PTK6|CXCL12|STK11|FZD1|CARM1|EHD1|ARC|DISC1|CERS2|SEMA4C|RGMA|SEMA4A|PRAG1	-1.8	MyList
Reactome Gene Sets	6	R-HSA-4608870	Asymmetric localization of PCP proteins		-3.2	5.6	4.8	30182	64	502	6	1.2	0.49	5710|5711|7311|7855|7976|8321	PSMD4|PSMD5|UBA52|FZD5|FZD3|FZD1	-1.8	MyList
GO Biological Processes	19	GO:0090657	telomeric loop disassembly	19_GO:0008152 metabolic process	-3.2	16	6.6	30182	11	502	3	0.6	0.34	7517|9401|84464	XRCC3|RECQL4|SLX4	-1.8	MyList
Canonical Pathways	11	M209	PID P38 GAMMA DELTA PATHWAY		-3.2	16	6.6	30182	11	502	3	0.6	0.34	3925|5606|6300	STMN1|MAP2K3|MAPK12	-1.8	MyList
KEGG Pathway	24	hsa05205	Proteoglycans in cancer		-3.2	3.2	4.2	30182	205	502	11	2.2	0.65	858|3845|5170|6300|6469|7855|7976|8321|8326|11211|54776	CAV2|KRAS|PDPK1|MAPK12|SHH|FZD5|FZD3|FZD1|FZD9|FZD10|PPP1R12C	-1.8	MyList
GO Biological Processes	19	GO:0001938	positive regulation of endothelial cell proliferation	19_GO:0048518 positive regulation of biological process	-3.2	4.2	4.4	30182	115	502	8	1.6	0.56	858|2624|5170|6387|7010|8828|51157|116844	CAV2|GATA2|PDPK1|CXCL12|TEK|NRP2|ZNF580|LRG1	-1.8	MyList
Reactome Gene Sets	6	R-HSA-5675221	Negative regulation of MAPK pathway		-3.1	7	5.1	30182	43	502	5	1	0.44	1844|3845|5536|6300|7311	DUSP2|KRAS|PPP5C|MAPK12|UBA52	-1.8	MyList
GO Biological Processes	19	GO:0055080	monoatomic cation homeostasis	19_GO:0042592 homeostatic process	-3.1	2.3	3.8	30182	495	502	19	3.8	0.85	368|489|596|664|858|1815|1991|2034|3074|3932|4241|5621|6387|8326|9256|10723|27185|57468|66002	ABCC6|ATP2A3|BCL2|BNIP3|CAV2|DRD4|ELANE|EPAS1|HEXB|LCK|MELTF|PRNP|CXCL12|FZD9|TSPOAP1|SLC12A7|DISC1|SLC12A5|CYP4F12	-1.8	MyList
GO Biological Processes	19	GO:0030855	epithelial cell differentiation	19_GO:0032502 developmental process	-3.1	2.2	3.7	30182	615	502	22	4.4	0.91	2034|2302|2624|3202|3845|3852|3872|3883|5170|5339|5493|5753|6701|7357|7855|8321|9788|10591|10741|30812|54538|79977	EPAS1|FOXJ1|GATA2|HOXA5|KRAS|KRT5|KRT17|KRT33A|PDPK1|PLEC|PPL|PTK6|SPRR2B|UGCG|FZD5|FZD1|MTSS1|DNPH1|RBBP9|SOX8|ROBO4|GRHL2	-1.8	MyList
GO Biological Processes	19	GO:0060487	lung epithelial cell differentiation	19_GO:0032502 developmental process	-3.1	9.6	5.6	30182	25	502	4	0.8	0.4	3202|3845|10741|79977	HOXA5|KRAS|RBBP9|GRHL2	-1.8	MyList
GO Biological Processes	19	GO:0060706	cell differentiation involved in embryonic placenta development	19_GO:0022414 reproductive process	-3.1	9.6	5.6	30182	25	502	4	0.8	0.4	3976|7855|10049|79977	LIF|FZD5|DNAJB6|GRHL2	-1.8	MyList
GO Biological Processes	19	GO:0060479	lung cell differentiation	19_GO:0032502 developmental process	-3.1	9.6	5.6	30182	25	502	4	0.8	0.4	3202|3845|10741|79977	HOXA5|KRAS|RBBP9|GRHL2	-1.8	MyList
GO Biological Processes	19	GO:0001843	neural tube closure	19_GO:0032502 developmental process	-3.1	4.7	4.5	30182	90	502	7	1.4	0.52	7976|8321|9620|23059|54910|56963|79977	FZD3|FZD1|CELSR1|CLUAP1|SEMA4C|RGMA|GRHL2	-1.8	MyList
GO Biological Processes	19	GO:0031344	regulation of cell projection organization	19_GO:0050789 regulation of biological process	-3.1	2.1	3.7	30182	660	502	23	4.6	0.93	780|2242|2672|4780|5176|5337|5621|5753|5909|6387|6794|8321|10498|10938|23237|27185|29956|49856|54443|54910|56963|64218|157285	DDR1|FES|GFI1|NFE2L2|SERPINF1|PLD1|PRNP|PTK6|RAP1GAP|CXCL12|STK11|FZD1|CARM1|EHD1|ARC|DISC1|CERS2|WRAP73|ANLN|SEMA4C|RGMA|SEMA4A|PRAG1	-1.8	MyList
GO Biological Processes	19	GO:0007018	microtubule-based movement	19_GO:0009987 cellular process	-3.1	2.5	3.9	30182	384	502	16	3.2	0.78	1780|3832|6780|6993|9531|23059|50632|55567|79582|80208|84223|84871|144406|146439|161514|164714	DYNC1I1|KIF11|STAU1|DYNLT1|BAG3|CLUAP1|CALY|DNAH3|SPAG16|SPG11|IQCG|AGBL4|CFAP251|BICDL2|TBC1D21|TTLL8	-1.8	MyList
Canonical Pathways	11	M255	PID HIF1 TFPATHWAY		-3.1	5.5	4.7	30182	66	502	6	1.2	0.49	664|2624|2645|5209|6387|6513	BNIP3|GATA2|GCK|PFKFB3|CXCL12|SLC2A1	-1.8	MyList
GO Biological Processes	19	GO:0060606	tube closure	19_GO:0032502 developmental process	-3.1	4.6	4.5	30182	91	502	7	1.4	0.52	7976|8321|9620|23059|54910|56963|79977	FZD3|FZD1|CELSR1|CLUAP1|SEMA4C|RGMA|GRHL2	-1.8	MyList
KEGG Pathway	24	hsa05224	Breast cancer		-3.1	3.7	4.2	30182	147	502	9	1.8	0.59	672|3845|7855|7976|8321|8326|10023|11211|399694	BRCA1|KRAS|FZD5|FZD3|FZD1|FZD9|FRAT1|FZD10|SHC4	-1.8	MyList
GO Biological Processes	19	GO:0046209	nitric oxide metabolic process	19_GO:0008152 metabolic process	-3.1	9.2	5.5	30182	26	502	4	0.8	0.4	54|2644|5447|23564	ACP5|GCHFR|POR|DDAH2	-1.8	MyList
GO Biological Processes	19	GO:0009410	response to xenobiotic stimulus	19_GO:0050896 response to stimulus	-3.1	2.4	3.8	30182	425	502	17	3.4	0.81	218|328|368|596|874|3932|4780|4968|5447|5621|7976|8321|10257|54905|57468|63826|66002	ALDH3A1|APEX1|ABCC6|BCL2|CBR3|LCK|NFE2L2|OGG1|POR|PRNP|FZD3|FZD1|ABCC4|CYP2W1|SLC12A5|SRR|CYP4F12	-1.8	MyList
GO Biological Processes	19	GO:0035148	tube formation	19_GO:0032502 developmental process	-3.1	3.7	4.2	30182	148	502	9	1.8	0.59	6469|7976|8321|9620|23059|30812|54910|56963|79977	SHH|FZD3|FZD1|CELSR1|CLUAP1|SOX8|SEMA4C|RGMA|GRHL2	-1.8	MyList
KEGG Pathway	24	hsa04071	Sphingolipid signaling pathway		-3.1	4	4.3	30182	119	502	8	1.6	0.56	596|3845|5170|5337|6300|7186|10672|29956	BCL2|KRAS|PDPK1|PLD1|MAPK12|TRAF2|GNA13|CERS2	-1.8	MyList
KEGG Pathway	24	hsa04722	Neurotrophin signaling pathway		-3.1	4	4.3	30182	119	502	8	1.6	0.56	596|810|3656|3845|5170|6300|51806|399694	BCL2|CALML3|IRAK2|KRAS|PDPK1|MAPK12|CALML5|SHC4	-1.8	MyList
GO Biological Processes	19	GO:0046649	lymphocyte activation	19_GO:0002376 immune system process	-3.1	2.3	3.8	30182	464	502	18	3.6	0.83	596|925|1525|2529|2841|3142|3662|3683|3902|3932|6469|6794|7001|7855|8326|23228|26191|64218	BCL2|CD8A|CXADR|FUT7|GPR18|HLX|IRF4|ITGAL|LAG3|LCK|SHH|STK11|PRDX2|FZD5|FZD9|PLCL2|PTPN22|SEMA4A	-1.8	MyList
GO Biological Processes	19	GO:0008347	glial cell migration	19_GO:0032502 developmental process	-3.1	6.7	5	30182	45	502	5	1	0.44	566|3074|4323|9289|27185	AZU1|HEXB|MMP14|ADGRG1|DISC1	-1.8	MyList
GO Biological Processes	19	GO:0022412	cellular process involved in reproduction in multicellular organism	19_GO:0022414 reproductive process	-3.1	2.4	3.8	30182	426	502	17	3.4	0.81	596|1525|1731|2296|3074|5901|54456|79582|84223|124626|147912|161514|161931|164091|201164|245711|339345	BCL2|CXADR|SEPTIN1|FOXC1|HEXB|RAN|MOV10L1|SPAG16|IQCG|ZPBP2|SIX5|TBC1D21|ADAD2|PAQR7|PLD6|SPDYA|NANOS2	-1.8	MyList
GO Biological Processes	19	GO:0002237	response to molecule of bacterial origin	19_GO:0044419 biological process involved in interspecies interaction between organisms	-3.1	2.6	3.8	30182	351	502	15	3	0.76	54|1053|1440|1991|2672|3587|3656|5606|7001|7855|10225|22904|25819|26191|63826	ACP5|CEBPE|CSF3|ELANE|GFI1|IL10RA|IRAK2|MAP2K3|PRDX2|FZD5|CD96|SBNO2|NOCT|PTPN22|SRR	-1.8	MyList
GO Biological Processes	19	GO:0045321	leukocyte activation	19_GO:0002376 immune system process	-3.1	2.2	3.7	30182	584	502	21	4.2	0.89	566|596|925|1525|1773|2529|2841|3142|3662|3683|3902|3932|6469|6794|7001|7855|8326|22904|23228|26191|64218	AZU1|BCL2|CD8A|CXADR|DNASE1|FUT7|GPR18|HLX|IRF4|ITGAL|LAG3|LCK|SHH|STK11|PRDX2|FZD5|FZD9|SBNO2|PLCL2|PTPN22|SEMA4A	-1.8	MyList
Reactome Gene Sets	6	R-HSA-8951664	Neddylation		-3	2.9	4	30182	245	502	12	2.4	0.68	672|2034|4780|5710|5711|7311|25879|28991|64326|79016|90135|122769	BRCA1|EPAS1|NFE2L2|PSMD4|PSMD5|UBA52|DCAF13|COMMD5|COP1|DDA1|BTBD6|LRR1	-1.8	MyList
GO Biological Processes	19	GO:0002069	columnar/cuboidal epithelial cell maturation	19_GO:0032502 developmental process	-3	15	6.3	30182	12	502	3	0.6	0.34	2624|3202|7855	GATA2|HOXA5|FZD5	-1.8	MyList
GO Biological Processes	19	GO:1903238	positive regulation of leukocyte tethering or rolling	19_GO:0040011 locomotion	-3	15	6.3	30182	12	502	3	0.6	0.34	1991|2526|2529	ELANE|FUT4|FUT7	-1.8	MyList
GO Biological Processes	19	GO:0006285	base-excision repair, AP site formation	19_GO:0050896 response to stimulus	-3	15	6.3	30182	12	502	3	0.6	0.34	4350|4968|79661	MPG|OGG1|NEIL1	-1.8	MyList
GO Biological Processes	19	GO:0043248	proteasome assembly	19_GO:0009987 cellular process	-3	15	6.3	30182	12	502	3	0.6	0.34	5711|84262|389362	PSMD5|PSMG3|PSMG4	-1.8	MyList
GO Biological Processes	19	GO:0002252	immune effector process	19_GO:0002376 immune system process	-3	2.5	3.8	30182	389	502	16	3.2	0.78	566|925|1379|1773|1991|2268|2529|3142|3662|3683|3902|5339|7001|22904|23228|64218	AZU1|CD8A|CR1L|DNASE1|ELANE|FGR|FUT7|HLX|IRF4|ITGAL|LAG3|PLEC|PRDX2|SBNO2|PLCL2|SEMA4A	-1.8	MyList
GO Biological Processes	19	GO:0002703	regulation of leukocyte mediated immunity	19_GO:0002376 immune system process	-3	2.9	4	30182	246	502	12	2.4	0.68	1379|1773|2242|2268|2302|2529|2624|3902|5170|7186|7855|10225	CR1L|DNASE1|FES|FGR|FOXJ1|FUT7|GATA2|LAG3|PDPK1|TRAF2|FZD5|CD96	-1.8	MyList
GO Biological Processes	19	GO:0045859	regulation of protein kinase activity	19_GO:0008152 metabolic process	-3	2.1	3.7	30182	627	502	22	4.4	0.91	566|1815|1991|2268|4486|5170|5339|5606|5621|5753|6794|7186|7532|7855|8115|9088|10645|11211|26191|79893|116986|245711	AZU1|DRD4|ELANE|FGR|MST1R|PDPK1|PLEC|MAP2K3|PRNP|PTK6|STK11|TRAF2|YWHAG|FZD5|TCL1A|PKMYT1|CAMKK2|FZD10|PTPN22|GGNBP2|AGAP2|SPDYA	-1.8	MyList
GO Biological Processes	19	GO:0001568	blood vessel development	19_GO:0032502 developmental process	-3	2.3	3.7	30182	506	502	19	3.8	0.85	302|682|2034|2296|2624|3213|4323|6469|7010|7127|7855|8828|9289|10672|22846|30008|54538|64218|79893	ANXA2|BSG|EPAS1|FOXC1|GATA2|HOXB3|MMP14|SHH|TEK|TNFAIP2|FZD5|NRP2|ADGRG1|GNA13|VASH1|EFEMP2|ROBO4|SEMA4A|GGNBP2	-1.8	MyList
GO Biological Processes	19	GO:0042303	molting cycle	19_GO:0032501 multicellular organismal process	-3	4.5	4.4	30182	93	502	7	1.4	0.52	596|3872|6469|7976|9855|11166|55366	BCL2|KRT17|SHH|FZD3|FARP2|SOX21|LGR4	-1.8	MyList
KEGG Pathway	24	hsa04912	GnRH signaling pathway		-3	4.5	4.4	30182	93	502	7	1.4	0.52	810|3845|4323|5337|5606|6300|51806	CALML3|KRAS|MMP14|PLD1|MAP2K3|MAPK12|CALML5	-1.8	MyList
GO Biological Processes	19	GO:0014033	neural crest cell differentiation	19_GO:0032502 developmental process	-3	4.5	4.4	30182	93	502	7	1.4	0.52	2296|4902|6469|8828|30812|54910|64218	FOXC1|NRTN|SHH|NRP2|SOX8|SEMA4C|SEMA4A	-1.8	MyList
GO Biological Processes	19	GO:0042633	hair cycle	19_GO:0032501 multicellular organismal process	-3	4.5	4.4	30182	93	502	7	1.4	0.52	596|3872|6469|7976|9855|11166|55366	BCL2|KRT17|SHH|FZD3|FARP2|SOX21|LGR4	-1.8	MyList
GO Biological Processes	19	GO:0055082	cellular chemical homeostasis	19_GO:0042592 homeostatic process	-3	2.2	3.7	30182	546	502	20	4	0.87	368|489|596|664|858|1815|1991|2645|3074|3932|5176|5621|6387|7776|8326|8660|9256|10723|27185|57468	ABCC6|ATP2A3|BCL2|BNIP3|CAV2|DRD4|ELANE|GCK|HEXB|LCK|SERPINF1|PRNP|CXCL12|ZNF236|FZD9|IRS2|TSPOAP1|SLC12A7|DISC1|SLC12A5	-1.8	MyList
GO Biological Processes	19	GO:1903038	negative regulation of leukocyte cell-cell adhesion	19_GO:0048519 negative regulation of biological process	-3	3.6	4.2	30182	150	502	9	1.8	0.59	1493|2302|3142|3902|5621|6387|6469|7001|26191	CTLA4|FOXJ1|HLX|LAG3|PRNP|CXCL12|SHH|PRDX2|PTPN22	-1.8	MyList
GO Biological Processes	19	GO:0050801	monoatomic ion homeostasis	19_GO:0042592 homeostatic process	-3	2.3	3.7	30182	507	502	19	3.8	0.85	368|489|596|664|858|1815|1991|2034|3074|3932|4241|5621|6387|8326|9256|10723|27185|57468|66002	ABCC6|ATP2A3|BCL2|BNIP3|CAV2|DRD4|ELANE|EPAS1|HEXB|LCK|MELTF|PRNP|CXCL12|FZD9|TSPOAP1|SLC12A7|DISC1|SLC12A5|CYP4F12	-1.8	MyList
KEGG Pathway	24	hsa04152	AMPK signaling pathway		-3	4	4.3	30182	121	502	8	1.6	0.56	1149|5170|5209|5862|6794|8660|10645|23216	CIDEA|PDPK1|PFKFB3|RAB2A|STK11|IRS2|CAMKK2|TBC1D1	-1.7	MyList
KEGG Pathway	24	hsa00601	Glycosphingolipid biosynthesis - lacto and neolacto series		-3	8.9	5.3	30182	27	502	4	0.8	0.4	28|2526|2529|84002	ABO|FUT4|FUT7|B3GNT5	-1.7	MyList
GO Biological Processes	19	GO:2001057	reactive nitrogen species metabolic process	19_GO:0008152 metabolic process	-3	8.9	5.3	30182	27	502	4	0.8	0.4	54|2644|5447|23564	ACP5|GCHFR|POR|DDAH2	-1.7	MyList
GO Biological Processes	19	GO:0001890	placenta development	19_GO:0032502 developmental process	-3	3.6	4.1	30182	151	502	9	1.8	0.59	682|2034|2624|3976|7855|10049|22846|79893|79977	BSG|EPAS1|GATA2|LIF|FZD5|DNAJB6|VASH1|GGNBP2|GRHL2	-1.7	MyList
KEGG Pathway	24	hsa05417	Lipid and atherosclerosis		-3	3.1	4	30182	215	502	11	2.2	0.65	596|810|3845|4772|4780|5170|5606|6300|7186|51806|414062	BCL2|CALML3|KRAS|NFATC1|NFE2L2|PDPK1|MAP2K3|MAPK12|TRAF2|CALML5|CCL3L3	-1.7	MyList
GO Biological Processes	19	GO:0031330	negative regulation of cellular catabolic process	19_GO:0048519 negative regulation of biological process	-3	2.9	3.9	30182	249	502	12	2.4	0.68	302|596|1153|3587|6469|6815|7186|11187|25819|26191|55603|115572	ANXA2|BCL2|CIRBP|IL10RA|SHH|STYX|TRAF2|PKP3|NOCT|PTPN22|TENT5A|TENT5B	-1.7	MyList
GO Biological Processes	19	GO:0010720	positive regulation of cell development	19_GO:0032502 developmental process	-3	2.4	3.7	30182	432	502	17	3.4	0.81	596|2242|3142|3845|3976|4323|5176|5624|6387|6469|6794|7976|27185|30812|55626|64855|133522	BCL2|FES|HLX|KRAS|LIF|MMP14|SERPINF1|PROC|CXCL12|SHH|STK11|FZD3|DISC1|SOX8|AMBRA1|NIBAN2|PPARGC1B	-1.7	MyList
GO Biological Processes	19	GO:0007276	gamete generation	19_GO:0022414 reproductive process	-3	2	3.6	30182	760	502	25	5	0.97	596|1525|1731|2296|2302|2678|3074|5901|6794|9509|10732|30812|54456|55366|79582|79893|84223|124626|147912|161514|161931|164091|201164|245711|339345	BCL2|CXADR|SEPTIN1|FOXC1|FOXJ1|GGT1|HEXB|RAN|STK11|ADAMTS2|TCFL5|SOX8|MOV10L1|LGR4|SPAG16|GGNBP2|IQCG|ZPBP2|SIX5|TBC1D21|ADAD2|PAQR7|PLD6|SPDYA|NANOS2	-1.7	MyList
GO Biological Processes	19	GO:0060711	labyrinthine layer development	19_GO:0032502 developmental process	-3	6.4	4.8	30182	47	502	5	1	0.44	7855|10049|22846|79893|79977	FZD5|DNAJB6|VASH1|GGNBP2|GRHL2	-1.7	MyList
GO Biological Processes	19	GO:0001934	positive regulation of protein phosphorylation	19_GO:0048518 positive regulation of biological process	-3	2	3.6	30182	718	502	24	4.8	0.95	566|596|1440|1815|1991|3845|3976|4486|5008|5170|5606|5621|5753|6794|7010|7044|7186|7855|8115|8321|10645|11211|116986|245711	AZU1|BCL2|CSF3|DRD4|ELANE|KRAS|LIF|MST1R|OSM|PDPK1|MAP2K3|PRNP|PTK6|STK11|TEK|LEFTY2|TRAF2|FZD5|TCL1A|FZD1|CAMKK2|FZD10|AGAP2|SPDYA	-1.7	MyList
GO Biological Processes	19	GO:0034330	cell junction organization	19_GO:0009987 cellular process	-3	2.2	3.6	30182	513	502	19	3.8	0.85	389|596|1525|3987|5339|5621|6780|7855|8321|8326|9788|11187|23237|57555|64065|79977|80208|125111|137075	RHOC|BCL2|CXADR|LIMS1|PLEC|PRNP|STAU1|FZD5|FZD1|FZD9|MTSS1|PKP3|ARC|NLGN2|PERP|GRHL2|SPG11|GJD3|CLDN23	-1.7	MyList
GO Biological Processes	19	GO:0014020	primary neural tube formation	19_GO:0032502 developmental process	-2.9	4.4	4.3	30182	96	502	7	1.4	0.52	7976|8321|9620|23059|54910|56963|79977	FZD3|FZD1|CELSR1|CLUAP1|SEMA4C|RGMA|GRHL2	-1.7	MyList
GO Biological Processes	19	GO:0002064	epithelial cell development	19_GO:0032502 developmental process	-2.9	3.2	4	30182	185	502	10	2	0.62	2034|2302|2624|3202|5170|5339|7855|30812|54538|79977	EPAS1|FOXJ1|GATA2|HOXA5|PDPK1|PLEC|FZD5|SOX8|ROBO4|GRHL2	-1.7	MyList
Canonical Pathways	11	M77	PID WNT SIGNALING PATHWAY		-2.9	8.6	5.2	30182	28	502	4	0.8	0.4	7855|8321|8326|11211	FZD5|FZD1|FZD9|FZD10	-1.7	MyList
GO Biological Processes	19	GO:0001838	embryonic epithelial tube formation	19_GO:0032502 developmental process	-2.9	3.9	4.2	30182	124	502	8	1.6	0.56	7976|8321|9620|23059|30812|54910|56963|79977	FZD3|FZD1|CELSR1|CLUAP1|SOX8|SEMA4C|RGMA|GRHL2	-1.7	MyList
Reactome Gene Sets	6	R-HSA-2022857	Keratan sulfate degradation		-2.9	14	6	30182	13	502	3	0.6	0.34	2588|3074|4958	GALNS|HEXB|OMD	-1.7	MyList
GO Biological Processes	19	GO:1903599	positive regulation of autophagy of mitochondrion	19_GO:0048518 positive regulation of biological process	-2.9	14	6	30182	13	502	3	0.6	0.34	664|10645|55626	BNIP3|CAMKK2|AMBRA1	-1.7	MyList
GO Biological Processes	19	GO:1902373	negative regulation of mRNA catabolic process	19_GO:0048519 negative regulation of biological process	-2.9	5.1	4.5	30182	71	502	6	1.2	0.49	1153|7186|11187|25819|55603|115572	CIRBP|TRAF2|PKP3|NOCT|TENT5A|TENT5B	-1.7	MyList
Canonical Pathways	11	M141	PID PI3KCI PATHWAY		-2.9	6.3	4.7	30182	48	502	5	1	0.44	2268|3845|3932|5170|11033	FGR|KRAS|LCK|PDPK1|ADAP1	-1.7	MyList
GO Biological Processes	19	GO:0002673	regulation of acute inflammatory response	19_GO:0050896 response to stimulus	-2.9	6.3	4.7	30182	48	502	5	1	0.44	1773|2529|5008|5733|9180	DNASE1|FUT7|OSM|PTGER3|OSMR	-1.7	MyList
GO Biological Processes	19	GO:0002694	regulation of leukocyte activation	19_GO:0002376 immune system process	-2.9	2.1	3.6	30182	598	502	21	4.2	0.89	596|1493|1725|2242|2268|2302|2624|3142|3662|3902|3932|4323|5170|5621|6469|7001|8660|26191|55626|115650|283234	BCL2|CTLA4|DHPS|FES|FGR|FOXJ1|GATA2|HLX|IRF4|LAG3|LCK|MMP14|PDPK1|PRNP|SHH|PRDX2|IRS2|PTPN22|AMBRA1|TNFRSF13C|CCDC88B	-1.7	MyList
GO Biological Processes	19	GO:0000723	telomere maintenance	19_GO:0008152 metabolic process	-2.9	4.3	4.3	30182	97	502	7	1.4	0.52	328|3104|7517|9401|23137|80119|84464	APEX1|ZBTB48|XRCC3|RECQL4|SMC5|PIF1|SLX4	-1.7	MyList
GO Biological Processes	19	GO:0031347	regulation of defense response	19_GO:0050896 response to stimulus	-2.9	2	3.5	30182	767	502	25	5	0.97	54|1773|1991|2268|2529|2672|2678|3656|3662|3902|4780|5008|5170|5176|5624|5733|7010|9180|10225|22904|26191|54476|55366|57169|81844	ACP5|DNASE1|ELANE|FGR|FUT7|GFI1|GGT1|IRAK2|IRF4|LAG3|NFE2L2|OSM|PDPK1|SERPINF1|PROC|PTGER3|TEK|OSMR|CD96|SBNO2|PTPN22|RNF216|LGR4|ZNFX1|TRIM56	-1.7	MyList
KEGG Pathway	24	hsa04150	mTOR signaling pathway		-2.9	3.5	4	30182	156	502	9	1.8	0.59	3845|5170|6794|7855|7976|8321|8326|9675|11211	KRAS|PDPK1|STK11|FZD5|FZD3|FZD1|FZD9|TTI1|FZD10	-1.7	MyList
GO Biological Processes	19	GO:0045860	positive regulation of protein kinase activity	19_GO:0048518 positive regulation of biological process	-2.9	2.5	3.7	30182	364	502	15	3	0.76	566|1815|1991|4486|5170|5606|5621|6794|7186|7855|8115|10645|11211|116986|245711	AZU1|DRD4|ELANE|MST1R|PDPK1|MAP2K3|PRNP|STK11|TRAF2|FZD5|TCL1A|CAMKK2|FZD10|AGAP2|SPDYA	-1.7	MyList
GO Biological Processes	19	GO:0046777	protein autophosphorylation	19_GO:0008152 metabolic process	-2.9	3.2	3.9	30182	188	502	10	2	0.62	780|2242|2268|3932|5170|5753|6794|7010|8711|10645	DDR1|FES|FGR|LCK|PDPK1|PTK6|STK11|TEK|TNK1|CAMKK2	-1.7	MyList
GO Biological Processes	19	GO:0031331	positive regulation of cellular catabolic process	19_GO:0048518 positive regulation of biological process	-2.9	2.3	3.6	30182	441	502	17	3.4	0.81	664|4780|5433|5886|6794|8660|9531|10645|25819|27185|55626|56963|64326|79016|84871|255488|339345	BNIP3|NFE2L2|POLR2D|RAD23A|STK11|IRS2|BAG3|CAMKK2|NOCT|DISC1|AMBRA1|RGMA|COP1|DDA1|AGBL4|RNF144B|NANOS2	-1.7	MyList
Reactome Gene Sets	6	R-HSA-5601884	PIWI-interacting RNA (piRNA) biogenesis		-2.9	8.3	5.1	30182	29	502	4	0.8	0.4	5433|54456|113802|201164	POLR2D|MOV10L1|HENMT1|PLD6	-1.7	MyList
GO Biological Processes	19	GO:0045109	intermediate filament organization	19_GO:0009987 cellular process	-2.9	4.9	4.4	30182	73	502	6	1.2	0.49	3852|3872|3883|5339|6469|10049	KRT5|KRT17|KRT33A|PLEC|SHH|DNAJB6	-1.6	MyList
GO Biological Processes	19	GO:0006909	phagocytosis	19_GO:0051179 localization	-2.9	3.4	4	30182	158	502	9	1.8	0.59	1053|1991|2268|2624|3683|4486|79767|80208|83871	CEBPE|ELANE|FGR|GATA2|ITGAL|MST1R|ELMO3|SPG11|RAB34	-1.6	MyList
GO Biological Processes	19	GO:0032496	response to lipopolysaccharide	19_GO:0044419 biological process involved in interspecies interaction between organisms	-2.9	2.6	3.7	30182	330	502	14	2.8	0.73	54|1053|1440|1991|2672|3587|3656|5606|7001|10225|22904|25819|26191|63826	ACP5|CEBPE|CSF3|ELANE|GFI1|IL10RA|IRAK2|MAP2K3|PRDX2|CD96|SBNO2|NOCT|PTPN22|SRR	-1.6	MyList
GO Biological Processes	19	GO:0046631	alpha-beta T cell activation	19_GO:0002376 immune system process	-2.8	4.2	4.2	30182	100	502	7	1.4	0.52	596|2529|2841|3142|3662|6469|64218	BCL2|FUT7|GPR18|HLX|IRF4|SHH|SEMA4A	-1.6	MyList
GO Biological Processes	19	GO:0021915	neural tube development	19_GO:0032502 developmental process	-2.8	3.4	4	30182	159	502	9	1.8	0.59	6469|7976|8321|9620|23059|54910|55626|56963|79977	SHH|FZD3|FZD1|CELSR1|CLUAP1|SEMA4C|AMBRA1|RGMA|GRHL2	-1.6	MyList
GO Biological Processes	19	GO:0097193	intrinsic apoptotic signaling pathway	19_GO:0023052 signaling	-2.8	3.4	4	30182	159	502	9	1.8	0.59	489|596|664|672|6794|7186|27141|64065|133746	ATP2A3|BCL2|BNIP3|BRCA1|STK11|TRAF2|CIDEB|PERP|JMY	-1.6	MyList
GO Biological Processes	19	GO:1904424	regulation of GTP binding	19_GO:0065007 biological regulation	-2.8	13	5.8	30182	14	502	3	0.6	0.34	3925|5909|9236	STMN1|RAP1GAP|CCPG1	-1.6	MyList
KEGG Pathway	24	hsa05163	Human cytomegalovirus infection		-2.8	2.9	3.8	30182	225	502	11	2.2	0.65	810|3587|3845|4772|5733|6300|6387|7186|10672|51806|414062	CALML3|IL10RA|KRAS|NFATC1|PTGER3|MAPK12|CXCL12|TRAF2|GNA13|CALML5|CCL3L3	-1.6	MyList
GO Biological Processes	19	GO:0048741	skeletal muscle fiber development	19_GO:0032502 developmental process	-2.8	8	5	30182	30	502	4	0.8	0.4	596|858|5339|80208	BCL2|CAV2|PLEC|SPG11	-1.6	MyList
GO Biological Processes	19	GO:0043368	positive T cell selection	19_GO:0002376 immune system process	-2.8	8	5	30182	30	502	4	0.8	0.4	596|3662|6469|6794	BCL2|IRF4|SHH|STK11	-1.6	MyList
GO Biological Processes	19	GO:0040007	growth	19_GO:0040007 growth	-2.8	2.4	3.6	30182	408	502	16	3.2	0.78	596|780|1525|2242|2296|3142|3202|5339|6469|6794|8326|8828|57468|79977|80208|84296	BCL2|DDR1|CXADR|FES|FOXC1|HLX|HOXA5|PLEC|SHH|STK11|FZD9|NRP2|SLC12A5|GRHL2|SPG11|GINS4	-1.6	MyList
GO Biological Processes	19	GO:0048589	developmental growth	19_GO:0040007 growth	-2.8	2.4	3.6	30182	408	502	16	3.2	0.78	596|780|1525|2242|2296|3142|3202|5339|6469|6794|8326|8828|57468|79977|80208|84296	BCL2|DDR1|CXADR|FES|FOXC1|HLX|HOXA5|PLEC|SHH|STK11|FZD9|NRP2|SLC12A5|GRHL2|SPG11|GINS4	-1.6	MyList
GO Biological Processes	19	GO:0032990	cell part morphogenesis	19_GO:0032502 developmental process	-2.8	2.2	3.5	30182	487	502	18	3.6	0.83	596|780|3199|3925|5339|6387|6469|6794|7465|7976|8828|23237|54538|54910|64218|64855|80208|113246	BCL2|DDR1|HOXA2|STMN1|PLEC|CXCL12|SHH|STK11|WEE1|FZD3|NRP2|ARC|ROBO4|SEMA4C|SEMA4A|NIBAN2|SPG11|C12orf57	-1.6	MyList
GO Biological Processes	19	GO:0006974	cellular response to DNA damage stimulus	19_GO:0050896 response to stimulus	-2.8	2	3.4	30182	736	502	24	4.8	0.95	328|596|672|1018|1493|2178|4350|4968|5536|5886|6300|6794|7517|9401|23137|27141|28992|79661|80119|84296|84464|133746|199990|245711	APEX1|BCL2|BRCA1|CDK3|CTLA4|FANCE|MPG|OGG1|PPP5C|RAD23A|MAPK12|STK11|XRCC3|RECQL4|SMC5|CIDEB|MACROD1|NEIL1|PIF1|GINS4|SLX4|JMY|FAAP20|SPDYA	-1.6	MyList
GO Biological Processes	19	GO:0000209	protein polyubiquitination	19_GO:0008152 metabolic process	-2.8	2.9	3.8	30182	226	502	11	2.2	0.65	596|672|7186|10277|29945|54476|55626|79016|81844|118424|255488	BCL2|BRCA1|TRAF2|UBE4B|ANAPC4|RNF216|AMBRA1|DDA1|TRIM56|UBE2J2|RNF144B	-1.6	MyList
GO Biological Processes	19	GO:0030036	actin cytoskeleton organization	19_GO:0009987 cellular process	-2.8	2.2	3.5	30182	528	502	19	3.8	0.85	596|1525|2302|3845|5170|5339|5901|9788|9855|10049|50853|54443|54509|57553|64236|79767|116986|133522|133746	BCL2|CXADR|FOXJ1|KRAS|PDPK1|PLEC|RAN|MTSS1|FARP2|DNAJB6|VILL|ANLN|RHOF|MICAL3|PDLIM2|ELMO3|AGAP2|PPARGC1B|JMY	-1.6	MyList
GO Biological Processes	19	GO:0032200	telomere organization	19_GO:0009987 cellular process	-2.8	3.7	4	30182	130	502	8	1.6	0.56	328|3104|7517|8353|9401|23137|80119|84464	APEX1|ZBTB48|XRCC3|H3C6|RECQL4|SMC5|PIF1|SLX4	-1.6	MyList
GO Biological Processes	19	GO:0010662	regulation of striated muscle cell apoptotic process	19_GO:0050789 regulation of biological process	-2.8	5.9	4.5	30182	51	502	5	1	0.44	664|4780|5170|9531|55626	BNIP3|NFE2L2|PDPK1|BAG3|AMBRA1	-1.6	MyList
GO Biological Processes	19	GO:0009617	response to bacterium	19_GO:0044419 biological process involved in interspecies interaction between organisms	-2.8	2	3.4	30182	696	502	23	4.6	0.93	54|566|664|1053|1440|1991|2268|2672|3587|3656|5606|7001|7855|10225|22904|25819|26191|55603|57169|63826|79792|116844|254773	ACP5|AZU1|BNIP3|CEBPE|CSF3|ELANE|FGR|GFI1|IL10RA|IRAK2|MAP2K3|PRDX2|FZD5|CD96|SBNO2|NOCT|PTPN22|TENT5A|ZNFX1|SRR|GSDMD|LRG1|LYG2	-1.6	MyList
GO Biological Processes	19	GO:0060627	regulation of vesicle-mediated transport	19_GO:0051179 localization	-2.8	2.2	3.5	30182	530	502	19	3.8	0.85	302|566|1731|1815|2242|2268|2624|4043|5170|5337|5867|5869|8447|10079|10938|23237|50632|51201|90019	ANXA2|AZU1|SEPTIN1|DRD4|FES|FGR|GATA2|LRPAP1|PDPK1|PLD1|RAB4A|RAB5B|DOC2B|ATP9A|EHD1|ARC|CALY|ZDHHC2|SYT8	-1.6	MyList
KEGG Pathway	24	hsa04068	FoxO signaling pathway		-2.8	3.7	4	30182	131	502	8	1.6	0.56	664|3845|5170|6300|6794|8660|9454|116986	BNIP3|KRAS|PDPK1|MAPK12|STK11|IRS2|HOMER3|AGAP2	-1.6	MyList
GO Biological Processes	19	GO:0050868	negative regulation of T cell activation	19_GO:0002376 immune system process	-2.8	3.7	4	30182	131	502	8	1.6	0.56	1493|2302|3142|3902|5621|6469|7001|26191	CTLA4|FOXJ1|HLX|LAG3|PRNP|SHH|PRDX2|PTPN22	-1.6	MyList
KEGG Pathway	24	hsa05200	Pathways in cancer		-2.8	2.2	3.5	30182	531	502	19	3.8	0.85	596|810|2034|3845|4780|5337|5733|6387|6469|6513|7186|7855|7976|8321|8326|10023|10672|11211|51806	BCL2|CALML3|EPAS1|KRAS|NFE2L2|PLD1|PTGER3|CXCL12|SHH|SLC2A1|TRAF2|FZD5|FZD3|FZD1|FZD9|FRAT1|GNA13|FZD10|CALML5	-1.6	MyList
GO Biological Processes	19	GO:0022407	regulation of cell-cell adhesion	19_GO:0050789 regulation of biological process	-2.8	2.2	3.5	30182	491	502	18	3.6	0.83	1493|1725|1991|2302|2526|2529|3142|3902|3932|5621|6387|6469|7001|26191|51201|55626|115650|283234	CTLA4|DHPS|ELANE|FOXJ1|FUT4|FUT7|HLX|LAG3|LCK|PRNP|CXCL12|SHH|PRDX2|PTPN22|ZDHHC2|AMBRA1|TNFRSF13C|CCDC88B	-1.6	MyList
GO Biological Processes	19	GO:0043304	regulation of mast cell degranulation	19_GO:0002376 immune system process	-2.8	7.8	4.9	30182	31	502	4	0.8	0.4	2242|2268|2624|5170	FES|FGR|GATA2|PDPK1	-1.6	MyList
GO Biological Processes	19	GO:0072175	epithelial tube formation	19_GO:0032502 developmental process	-2.8	3.6	4	30182	132	502	8	1.6	0.56	7976|8321|9620|23059|30812|54910|56963|79977	FZD3|FZD1|CELSR1|CLUAP1|SOX8|SEMA4C|RGMA|GRHL2	-1.6	MyList
GO Biological Processes	19	GO:0045639	positive regulation of myeloid cell differentiation	19_GO:0002376 immune system process	-2.8	4.1	4.1	30182	103	502	7	1.4	0.52	1440|2242|2624|3202|3976|23456|133522	CSF3|FES|GATA2|HOXA5|LIF|ABCB10|PPARGC1B	-1.6	MyList
Reactome Gene Sets	6	R-HSA-556833	Metabolism of lipids		-2.8	1.9	3.4	30182	743	502	24	4.8	0.95	39|224|622|1149|1717|2678|3074|4199|5337|5867|5901|7357|9023|9256|9611|10498|29956|51573|56994|60481|80221|124976|133522|201164	ACAT2|ALDH3A2|BDH1|CIDEA|DHCR7|GGT1|HEXB|ME1|PLD1|RAB4A|RAN|UGCG|CH25H|TSPOAP1|NCOR1|CARM1|CERS2|GDE1|CHPT1|ELOVL5|ACSF2|SPNS2|PPARGC1B|PLD6	-1.6	MyList
GO Biological Processes	19	GO:1903706	regulation of hemopoiesis	19_GO:0002376 immune system process	-2.8	2.3	3.5	30182	415	502	16	3.2	0.78	1440|1493|2242|2302|2624|3142|3202|3662|3902|3976|4323|6469|7001|23456|55626|133522	CSF3|CTLA4|FES|FOXJ1|GATA2|HLX|HOXA5|IRF4|LAG3|LIF|MMP14|SHH|PRDX2|ABCB10|AMBRA1|PPARGC1B	-1.6	MyList
GO Biological Processes	19	GO:0072006	nephron development	19_GO:0032502 developmental process	-2.8	3.6	3.9	30182	133	502	8	1.6	0.56	596|2296|2302|6469|7010|9788|30812|55366	BCL2|FOXC1|FOXJ1|SHH|TEK|MTSS1|SOX8|LGR4	-1.6	MyList
GO Biological Processes	19	GO:0001841	neural tube formation	19_GO:0032502 developmental process	-2.7	4	4	30182	104	502	7	1.4	0.52	7976|8321|9620|23059|54910|56963|79977	FZD3|FZD1|CELSR1|CLUAP1|SEMA4C|RGMA|GRHL2	-1.6	MyList
GO Biological Processes	19	GO:0072009	nephron epithelium development	19_GO:0032502 developmental process	-2.7	4	4	30182	104	502	7	1.4	0.52	596|2296|2302|6469|9788|30812|55366	BCL2|FOXC1|FOXJ1|SHH|MTSS1|SOX8|LGR4	-1.6	MyList
KEGG Pathway	24	hsa04660	T cell receptor signaling pathway		-2.7	4	4	30182	104	502	7	1.4	0.52	925|1493|3845|3932|4772|5170|6300	CD8A|CTLA4|KRAS|LCK|NFATC1|PDPK1|MAPK12	-1.6	MyList
GO Biological Processes	19	GO:0001942	hair follicle development	19_GO:0032502 developmental process	-2.7	4.7	4.2	30182	77	502	6	1.2	0.49	596|3872|6469|7976|11166|55366	BCL2|KRT17|SHH|FZD3|SOX21|LGR4	-1.6	MyList
GO Biological Processes	19	GO:0050792	regulation of viral process	19_GO:0016032 viral process	-2.7	3.3	3.8	30182	165	502	9	1.8	0.59	596|5886|6780|6993|9023|9830|9869|10410|57169	BCL2|RAD23A|STAU1|DYNLT1|CH25H|TRIM14|SETDB1|IFITM3|ZNFX1	-1.6	MyList
GO Biological Processes	19	GO:0007519	skeletal muscle tissue development	19_GO:0032502 developmental process	-2.7	3.6	3.9	30182	134	502	8	1.6	0.56	596|858|3142|3845|5339|6469|30812|80208	BCL2|CAV2|HLX|KRAS|PLEC|SHH|SOX8|SPG11	-1.6	MyList
GO Biological Processes	19	GO:0048812	neuron projection morphogenesis	19_GO:0032502 developmental process	-2.7	2.2	3.5	30182	457	502	17	3.4	0.81	596|780|3199|3925|6387|6469|6794|7465|7976|8828|23237|54538|54910|64218|64855|80208|113246	BCL2|DDR1|HOXA2|STMN1|CXCL12|SHH|STK11|WEE1|FZD3|NRP2|ARC|ROBO4|SEMA4C|SEMA4A|NIBAN2|SPG11|C12orf57	-1.5	MyList
GO Biological Processes	19	GO:0043552	positive regulation of phosphatidylinositol 3-kinase activity	19_GO:0048518 positive regulation of biological process	-2.7	7.5	4.8	30182	32	502	4	0.8	0.4	2268|7010|55626|116986	FGR|TEK|AMBRA1|AGAP2	-1.5	MyList
Reactome Gene Sets	6	R-HSA-1251985	Nuclear signaling by ERBB4		-2.7	7.5	4.8	30182	32	502	4	0.8	0.4	3925|6387|9611|11033	STMN1|CXCL12|NCOR1|ADAP1	-1.5	MyList
GO Biological Processes	19	GO:0048469	cell maturation	19_GO:0032502 developmental process	-2.7	3.3	3.8	30182	166	502	9	1.8	0.59	596|2034|2624|3202|7855|9855|26468|30812|201164	BCL2|EPAS1|GATA2|HOXA5|FZD5|FARP2|LHX6|SOX8|PLD6	-1.5	MyList
Reactome Gene Sets	6	R-HSA-9711123	Cellular response to chemical stress		-2.7	3	3.7	30182	199	502	10	2	0.62	672|4199|4780|5710|5711|5753|7001|7311|9611|10498	BRCA1|ME1|NFE2L2|PSMD4|PSMD5|PTK6|PRDX2|UBA52|NCOR1|CARM1	-1.5	MyList
GO Biological Processes	19	GO:0048598	embryonic morphogenesis	19_GO:0032502 developmental process	-2.7	2.1	3.4	30182	581	502	20	4	0.87	1844|2296|2299|2624|3142|3199|3202|3213|4323|6469|7855|7976|8321|9620|10049|23059|30812|54910|56963|79977	DUSP2|FOXC1|FOXI1|GATA2|HLX|HOXA2|HOXA5|HOXB3|MMP14|SHH|FZD5|FZD3|FZD1|CELSR1|DNAJB6|CLUAP1|SOX8|SEMA4C|RGMA|GRHL2	-1.5	MyList
GO Biological Processes	19	GO:0006935	chemotaxis	19_GO:0040011 locomotion	-2.7	2.2	3.4	30182	500	502	18	3.6	0.83	566|682|1525|2242|3199|5337|5339|6387|6469|7976|8828|9023|51157|54538|54910|64218|64855|414062	AZU1|BSG|CXADR|FES|HOXA2|PLD1|PLEC|CXCL12|SHH|FZD3|NRP2|CH25H|ZNF580|ROBO4|SEMA4C|SEMA4A|NIBAN2|CCL3L3	-1.5	MyList
GO Biological Processes	19	GO:2000179	positive regulation of neural precursor cell proliferation	19_GO:0048518 positive regulation of biological process	-2.7	5.6	4.4	30182	54	502	5	1	0.44	6469|7976|8326|9289|27185	SHH|FZD3|FZD9|ADGRG1|DISC1	-1.5	MyList
GO Biological Processes	19	GO:0019216	regulation of lipid metabolic process	19_GO:0008152 metabolic process	-2.7	2.4	3.5	30182	344	502	14	2.8	0.73	672|1149|1717|1917|2268|2672|5447|7010|8660|9611|29956|55626|60481|116986	BRCA1|CIDEA|DHCR7|EEF1A2|FGR|GFI1|POR|TEK|IRS2|NCOR1|CERS2|AMBRA1|ELOVL5|AGAP2	-1.5	MyList
GO Biological Processes	19	GO:0042330	taxis	19_GO:0040011 locomotion	-2.7	2.2	3.4	30182	502	502	18	3.6	0.83	566|682|1525|2242|3199|5337|5339|6387|6469|7976|8828|9023|51157|54538|54910|64218|64855|414062	AZU1|BSG|CXADR|FES|HOXA2|PLD1|PLEC|CXCL12|SHH|FZD3|NRP2|CH25H|ZNF580|ROBO4|SEMA4C|SEMA4A|NIBAN2|CCL3L3	-1.5	MyList
GO Biological Processes	19	GO:0043393	regulation of protein binding	19_GO:0065007 biological regulation	-2.7	3	3.7	30182	201	502	10	2	0.62	302|489|1440|1522|4043|5901|6815|23228|27185|56963	ANXA2|ATP2A3|CSF3|CTSZ|LRPAP1|RAN|STYX|PLCL2|DISC1|RGMA	-1.5	MyList
GO Biological Processes	19	GO:0051250	negative regulation of lymphocyte activation	19_GO:0002376 immune system process	-2.7	3.2	3.8	30182	168	502	9	1.8	0.59	1493|2268|2302|3142|3902|5621|6469|7001|26191	CTLA4|FGR|FOXJ1|HLX|LAG3|PRNP|SHH|PRDX2|PTPN22	-1.5	MyList
KEGG Pathway	24	hsa05225	Hepatocellular carcinoma		-2.7	3.2	3.8	30182	168	502	9	1.8	0.59	3845|4780|7855|7976|8321|8326|10023|11211|399694	KRAS|NFE2L2|FZD5|FZD3|FZD1|FZD9|FRAT1|FZD10|SHC4	-1.5	MyList
GO Biological Processes	19	GO:0120039	plasma membrane bounded cell projection morphogenesis	19_GO:0032502 developmental process	-2.7	2.2	3.4	30182	462	502	17	3.4	0.81	596|780|3199|3925|6387|6469|6794|7465|7976|8828|23237|54538|54910|64218|64855|80208|113246	BCL2|DDR1|HOXA2|STMN1|CXCL12|SHH|STK11|WEE1|FZD3|NRP2|ARC|ROBO4|SEMA4C|SEMA4A|NIBAN2|SPG11|C12orf57	-1.5	MyList
KEGG Pathway	24	hsa03410	Base excision repair		-2.7	7.3	4.7	30182	33	502	4	0.8	0.4	328|4350|4968|79661	APEX1|MPG|OGG1|NEIL1	-1.5	MyList
GO Biological Processes	19	GO:0010664	negative regulation of striated muscle cell apoptotic process	19_GO:0048519 negative regulation of biological process	-2.7	7.3	4.7	30182	33	502	4	0.8	0.4	4780|5170|9531|55626	NFE2L2|PDPK1|BAG3|AMBRA1	-1.5	MyList
GO Biological Processes	19	GO:0033006	regulation of mast cell activation involved in immune response	19_GO:0002376 immune system process	-2.7	7.3	4.7	30182	33	502	4	0.8	0.4	2242|2268|2624|5170	FES|FGR|GATA2|PDPK1	-1.5	MyList
GO Biological Processes	19	GO:0051222	positive regulation of protein transport	19_GO:0051179 localization	-2.7	2.5	3.5	30182	308	502	13	2.6	0.71	2645|4826|5621|5901|6469|7855|8447|8660|9531|51201|57555|79752|118424	GCK|NNAT|PRNP|RAN|SHH|FZD5|DOC2B|IRS2|BAG3|ZDHHC2|NLGN2|ZFAND1|UBE2J2	-1.5	MyList
GO Biological Processes	19	GO:0051249	regulation of lymphocyte activation	19_GO:0002376 immune system process	-2.7	2.2	3.4	30182	503	502	18	3.6	0.83	596|1493|1725|2268|2302|3142|3662|3902|3932|4323|5621|6469|7001|8660|26191|55626|115650|283234	BCL2|CTLA4|DHPS|FGR|FOXJ1|HLX|IRF4|LAG3|LCK|MMP14|PRNP|SHH|PRDX2|IRS2|PTPN22|AMBRA1|TNFRSF13C|CCDC88B	-1.5	MyList
GO Biological Processes	19	GO:0043547	positive regulation of GTPase activity	19_GO:0065007 biological regulation	-2.7	2.7	3.6	30182	272	502	12	2.4	0.68	858|2302|3987|5909|9649|11033|11211|23216|56963|116986|161514|414062	CAV2|FOXJ1|LIMS1|RAP1GAP|RALGPS1|ADAP1|FZD10|TBC1D1|RGMA|AGAP2|TBC1D21|CCL3L3	-1.5	MyList
GO Biological Processes	19	GO:2001256	regulation of store-operated calcium entry	19_GO:0051179 localization	-2.7	11	5.3	30182	16	502	3	0.6	0.34	9454|80208|84502	HOMER3|SPG11|JPH4	-1.5	MyList
GO Biological Processes	19	GO:0014857	regulation of skeletal muscle cell proliferation	19_GO:0050789 regulation of biological process	-2.7	11	5.3	30182	16	502	3	0.6	0.34	858|6469|147912	CAV2|SHH|SIX5	-1.5	MyList
GO Biological Processes	19	GO:0007409	axonogenesis	19_GO:0032502 developmental process	-2.7	2.4	3.5	30182	347	502	14	2.8	0.73	596|3199|3925|6387|6469|6794|7976|8828|54538|54910|64218|64855|80208|113246	BCL2|HOXA2|STMN1|CXCL12|SHH|STK11|FZD3|NRP2|ROBO4|SEMA4C|SEMA4A|NIBAN2|SPG11|C12orf57	-1.5	MyList
GO Biological Processes	19	GO:0006897	endocytosis	19_GO:0051179 localization	-2.7	2.3	3.4	30182	425	502	16	3.2	0.78	858|3587|5869|6469|10079|10462|10938|23237|50632|57555|58513|59283|83871|90019|90861|283316	CAV2|IL10RA|RAB5B|SHH|ATP9A|CLEC10A|EHD1|ARC|CALY|NLGN2|EPS15L1|CACNG8|RAB34|SYT8|JPT2|CD163L1	-1.5	MyList
GO Biological Processes	19	GO:0008360	regulation of cell shape	19_GO:0032502 developmental process	-2.7	3.5	3.8	30182	138	502	8	1.6	0.56	2242|2268|3074|10672|55171|64218|157285|161176	FES|FGR|HEXB|GNA13|TBCCD1|SEMA4A|PRAG1|SYNE3	-1.5	MyList
GO Biological Processes	19	GO:0007281	germ cell development	19_GO:0022414 reproductive process	-2.6	2.5	3.5	30182	310	502	13	2.6	0.71	596|3074|5901|54456|79582|84223|124626|147912|161514|161931|164091|201164|339345	BCL2|HEXB|RAN|MOV10L1|SPAG16|IQCG|ZPBP2|SIX5|TBC1D21|ADAD2|PAQR7|PLD6|NANOS2	-1.5	MyList
GO Biological Processes	19	GO:0062197	cellular response to chemical stress	19_GO:0050896 response to stimulus	-2.6	2.6	3.5	30182	274	502	12	2.4	0.68	328|596|664|2034|4780|5339|6513|6780|7001|10645|51157|133522	APEX1|BCL2|BNIP3|EPAS1|NFE2L2|PLEC|SLC2A1|STAU1|PRDX2|CAMKK2|ZNF580|PPARGC1B	-1.5	MyList
GO Biological Processes	19	GO:0045765	regulation of angiogenesis	19_GO:0032502 developmental process	-2.6	2.4	3.5	30182	349	502	14	2.8	0.73	672|2296|2624|3202|4780|4879|5170|5176|7010|22846|64218|64855|116844|126393	BRCA1|FOXC1|GATA2|HOXA5|NFE2L2|NPPB|PDPK1|SERPINF1|TEK|VASH1|SEMA4A|NIBAN2|LRG1|HSPB6	-1.5	MyList
GO Biological Processes	19	GO:0048858	cell projection morphogenesis	19_GO:0032502 developmental process	-2.6	2.2	3.4	30182	467	502	17	3.4	0.81	596|780|3199|3925|6387|6469|6794|7465|7976|8828|23237|54538|54910|64218|64855|80208|113246	BCL2|DDR1|HOXA2|STMN1|CXCL12|SHH|STK11|WEE1|FZD3|NRP2|ARC|ROBO4|SEMA4C|SEMA4A|NIBAN2|SPG11|C12orf57	-1.5	MyList
GO Biological Processes	19	GO:1902106	negative regulation of leukocyte differentiation	19_GO:0002376 immune system process	-2.6	3.9	3.9	30182	109	502	7	1.4	0.52	1493|2302|2624|3142|3902|6469|7001	CTLA4|FOXJ1|GATA2|HLX|LAG3|SHH|PRDX2	-1.5	MyList
GO Biological Processes	19	GO:0007218	neuropeptide signaling pathway	19_GO:0023052 signaling	-2.6	3.9	3.9	30182	109	502	7	1.4	0.52	2834|2837|4879|11247|53831|84634|347148	PRLHR|UTS2R|NPPB|NXPH4|GPR84|KISS1R|QRFP	-1.5	MyList
GO Biological Processes	19	GO:0061564	axon development	19_GO:0032502 developmental process	-2.6	2.3	3.4	30182	388	502	15	3	0.76	596|780|3199|3925|6387|6469|6794|7976|8828|54538|54910|64218|64855|80208|113246	BCL2|DDR1|HOXA2|STMN1|CXCL12|SHH|STK11|FZD3|NRP2|ROBO4|SEMA4C|SEMA4A|NIBAN2|SPG11|C12orf57	-1.5	MyList
GO Biological Processes	19	GO:0034121	regulation of toll-like receptor signaling pathway	19_GO:0044419 biological process involved in interspecies interaction between organisms	-2.6	7.1	4.6	30182	34	502	4	0.8	0.4	2672|3662|5170|55366	GFI1|IRF4|PDPK1|LGR4	-1.5	MyList
Canonical Pathways	11	M44	PID HIF2PATHWAY		-2.6	7.1	4.6	30182	34	502	4	0.8	0.4	328|2034|4323|6513	APEX1|EPAS1|MMP14|SLC2A1	-1.5	MyList
GO Biological Processes	19	GO:0014904	myotube cell development	19_GO:0032502 developmental process	-2.6	7.1	4.6	30182	34	502	4	0.8	0.4	596|858|5339|80208	BCL2|CAV2|PLEC|SPG11	-1.5	MyList
GO Biological Processes	19	GO:0002573	myeloid leukocyte differentiation	19_GO:0032502 developmental process	-2.6	3.4	3.8	30182	140	502	8	1.6	0.56	302|1053|1440|2624|3662|3976|9855|22904	ANXA2|CEBPE|CSF3|GATA2|IRF4|LIF|FARP2|SBNO2	-1.5	MyList
GO Biological Processes	19	GO:0051149	positive regulation of muscle cell differentiation	19_GO:0032502 developmental process	-2.6	4.4	4	30182	82	502	6	1.2	0.49	596|4323|6300|6469|30008|64855	BCL2|MMP14|MAPK12|SHH|EFEMP2|NIBAN2	-1.5	MyList
GO Biological Processes	19	GO:2000058	regulation of ubiquitin-dependent protein catabolic process	19_GO:0008152 metabolic process	-2.6	3.1	3.7	30182	173	502	9	1.8	0.59	4780|5886|6469|6815|27185|64326|79016|84871|255488	NFE2L2|RAD23A|SHH|STYX|DISC1|COP1|DDA1|AGBL4|RNF144B	-1.5	MyList
KEGG Pathway	24	hsa04140	Autophagy - animal		-2.6	3.4	3.7	30182	141	502	8	1.6	0.56	596|664|3845|5170|6794|8660|10645|55626	BCL2|BNIP3|KRAS|PDPK1|STK11|IRS2|CAMKK2|AMBRA1	-1.5	MyList
Reactome Gene Sets	6	R-HSA-168643	Nucleotide-binding domain, leucine rich repeat containing receptor (NLR) signaling pathways		-2.6	5.3	4.2	30182	57	502	5	1	0.44	596|3656|6300|7311|387522	BCL2|IRAK2|MAPK12|UBA52|PEDS1-UBE2V1	-1.5	MyList
GO Biological Processes	19	GO:0001503	ossification	19_GO:0032501 multicellular organismal process	-2.6	2.6	3.5	30182	278	502	12	2.4	0.68	596|2268|2296|3199|4323|6469|8321|8326|22904|30812|55366|133522	BCL2|FGR|FOXC1|HOXA2|MMP14|SHH|FZD1|FZD9|SBNO2|SOX8|LGR4|PPARGC1B	-1.5	MyList
GO Biological Processes	19	GO:2000060	positive regulation of ubiquitin-dependent protein catabolic process	19_GO:0048518 positive regulation of biological process	-2.6	3.8	3.8	30182	111	502	7	1.4	0.52	4780|5886|27185|64326|79016|84871|255488	NFE2L2|RAD23A|DISC1|COP1|DDA1|AGBL4|RNF144B	-1.5	MyList
GO Biological Processes	19	GO:0071674	mononuclear cell migration	19_GO:0002376 immune system process	-2.6	3.8	3.8	30182	111	502	7	1.4	0.52	2526|2529|3683|5339|9023|124976|414062	FUT4|FUT7|ITGAL|PLEC|CH25H|SPNS2|CCL3L3	-1.5	MyList
GO Biological Processes	19	GO:1902036	regulation of hematopoietic stem cell differentiation	19_GO:0032502 developmental process	-2.6	11	5.2	30182	17	502	3	0.6	0.34	2296|4780|5008	FOXC1|NFE2L2|OSM	-1.5	MyList
Reactome Gene Sets	6	R-HSA-6788467	IL-6-type cytokine receptor ligand interactions		-2.6	11	5.2	30182	17	502	3	0.6	0.34	3976|5008|9180	LIF|OSM|OSMR	-1.5	MyList
GO Biological Processes	19	GO:0002921	negative regulation of humoral immune response	19_GO:0002376 immune system process	-2.6	11	5.2	30182	17	502	3	0.6	0.34	966|1379|2302	CD59|CR1L|FOXJ1	-1.5	MyList
GO Biological Processes	19	GO:0035025	positive regulation of Rho protein signal transduction	19_GO:0023052 signaling	-2.6	6.9	4.5	30182	35	502	4	0.8	0.4	2841|9289|137735|157285	GPR18|ADGRG1|ABRA|PRAG1	-1.5	MyList
GO Biological Processes	19	GO:2000352	negative regulation of endothelial cell apoptotic process	19_GO:0048519 negative regulation of biological process	-2.6	6.9	4.5	30182	35	502	4	0.8	0.4	2624|4780|5170|7010	GATA2|NFE2L2|PDPK1|TEK	-1.5	MyList
GO Biological Processes	19	GO:1902369	negative regulation of RNA catabolic process	19_GO:0048519 negative regulation of biological process	-2.6	4.3	4	30182	83	502	6	1.2	0.49	1153|7186|11187|25819|55603|115572	CIRBP|TRAF2|PKP3|NOCT|TENT5A|TENT5B	-1.5	MyList
Reactome Gene Sets	6	R-HSA-5621481	C-type lectin receptors (CLRs)		-2.6	3.4	3.7	30182	142	502	8	1.6	0.56	3845|4772|5170|5710|5711|7311|10462|387522	KRAS|NFATC1|PDPK1|PSMD4|PSMD5|UBA52|CLEC10A|PEDS1-UBE2V1	-1.5	MyList
GO Biological Processes	19	GO:1901342	regulation of vasculature development	19_GO:0032502 developmental process	-2.6	2.4	3.4	30182	355	502	14	2.8	0.73	672|2296|2624|3202|4780|4879|5170|5176|7010|22846|64218|64855|116844|126393	BRCA1|FOXC1|GATA2|HOXA5|NFE2L2|NPPB|PDPK1|SERPINF1|TEK|VASH1|SEMA4A|NIBAN2|LRG1|HSPB6	-1.4	MyList
GO Biological Processes	19	GO:0051962	positive regulation of nervous system development	19_GO:0032502 developmental process	-2.6	2.6	3.4	30182	280	502	12	2.4	0.68	3845|3976|5176|6387|6469|6794|7976|27185|30812|57555|64218|441381	KRAS|LIF|SERPINF1|CXCL12|SHH|STK11|FZD3|DISC1|SOX8|NLGN2|SEMA4A|LRRC24	-1.4	MyList
GO Biological Processes	19	GO:0021953	central nervous system neuron differentiation	19_GO:0032502 developmental process	-2.6	3.1	3.6	30182	175	502	9	1.8	0.59	2624|6469|8828|26468|27185|57410|80208|84871|113246	GATA2|SHH|NRP2|LHX6|DISC1|SCYL1|SPG11|AGBL4|C12orf57	-1.4	MyList
GO Biological Processes	19	GO:0097435	supramolecular fiber organization	19_GO:0009987 cellular process	-2.6	2	3.2	30182	558	502	19	3.8	0.85	302|596|2296|3852|3872|3883|3925|5339|6469|9509|10049|30008|50853|54509|57553|79767|133522|133746|283234	ANXA2|BCL2|FOXC1|KRT5|KRT17|KRT33A|STMN1|PLEC|SHH|ADAMTS2|DNAJB6|EFEMP2|VILL|RHOF|MICAL3|ELMO3|PPARGC1B|JMY|CCDC88B	-1.4	MyList
GO Biological Processes	19	GO:0048871	multicellular organismal homeostasis	19_GO:0042592 homeostatic process	-2.5	2	3.2	30182	559	502	19	3.8	0.85	54|596|1149|1525|2034|2296|2624|3845|6513|6794|7001|9289|23456|51522|55366|66002|79738|124976|158046	ACP5|BCL2|CIDEA|CXADR|EPAS1|FOXC1|GATA2|KRAS|SLC2A1|STK11|PRDX2|ADGRG1|ABCB10|TMEM14C|LGR4|CYP4F12|BBS10|SPNS2|NXNL2	-1.4	MyList
GO Biological Processes	19	GO:1902105	regulation of leukocyte differentiation	19_GO:0002376 immune system process	-2.5	2.5	3.4	30182	319	502	13	2.6	0.71	1493|2242|2302|2624|3142|3662|3902|3976|4323|6469|7001|55626|133522	CTLA4|FES|FOXJ1|GATA2|HLX|IRF4|LAG3|LIF|MMP14|SHH|PRDX2|AMBRA1|PPARGC1B	-1.4	MyList
Canonical Pathways	11	M271	PID PI3K PLC TRK PATHWAY		-2.5	6.7	4.4	30182	36	502	4	0.8	0.4	3845|5170|7532|116986	KRAS|PDPK1|YWHAG|AGAP2	-1.4	MyList
GO Biological Processes	19	GO:0006739	NADP metabolic process	19_GO:0008152 metabolic process	-2.5	6.7	4.4	30182	36	502	4	0.8	0.4	2645|4199|25819|83594	GCK|ME1|NOCT|NUDT12	-1.4	MyList
GO Biological Processes	19	GO:0048255	mRNA stabilization	19_GO:0048519 negative regulation of biological process	-2.5	5.1	4.1	30182	59	502	5	1	0.44	1153|7186|25819|55603|115572	CIRBP|TRAF2|NOCT|TENT5A|TENT5B	-1.4	MyList
GO Biological Processes	19	GO:0040011	locomotion	19_GO:0040011 locomotion	-2.5	2.1	3.2	30182	520	502	18	3.6	0.83	566|682|1525|2242|3199|5337|5339|6387|6469|7976|8828|9023|51157|54538|54910|64218|64855|414062	AZU1|BSG|CXADR|FES|HOXA2|PLD1|PLEC|CXCL12|SHH|FZD3|NRP2|CH25H|ZNF580|ROBO4|SEMA4C|SEMA4A|NIBAN2|CCL3L3	-1.4	MyList
GO Biological Processes	19	GO:0016331	morphogenesis of embryonic epithelium	19_GO:0032502 developmental process	-2.5	3.3	3.6	30182	145	502	8	1.6	0.56	7976|8321|9620|23059|30812|54910|56963|79977	FZD3|FZD1|CELSR1|CLUAP1|SOX8|SEMA4C|RGMA|GRHL2	-1.4	MyList
GO Biological Processes	19	GO:0031175	neuron projection development	19_GO:0032502 developmental process	-2.5	2	3.2	30182	647	502	21	4.2	0.89	596|780|3199|3925|4902|6387|6469|6794|7465|7976|8828|10938|23237|54538|54910|56963|57468|64218|64855|80208|113246	BCL2|DDR1|HOXA2|STMN1|NRTN|CXCL12|SHH|STK11|WEE1|FZD3|NRP2|EHD1|ARC|ROBO4|SEMA4C|RGMA|SLC12A5|SEMA4A|NIBAN2|SPG11|C12orf57	-1.4	MyList
GO Biological Processes	19	GO:0010755	regulation of plasminogen activation	19_GO:0008152 metabolic process	-2.5	10	5	30182	18	502	3	0.6	0.34	302|1522|4241	ANXA2|CTSZ|MELTF	-1.4	MyList
GO Biological Processes	19	GO:0043369	CD4-positive or CD8-positive, alpha-beta T cell lineage commitment	19_GO:0002376 immune system process	-2.5	10	5	30182	18	502	3	0.6	0.34	596|3662|6469	BCL2|IRF4|SHH	-1.4	MyList
GO Biological Processes	19	GO:0006875	cellular metal ion homeostasis	19_GO:0042592 homeostatic process	-2.5	2.4	3.3	30182	322	502	13	2.6	0.71	489|596|664|858|1815|1991|3074|3932|5621|6387|8326|9256|27185	ATP2A3|BCL2|BNIP3|CAV2|DRD4|ELANE|HEXB|LCK|PRNP|CXCL12|FZD9|TSPOAP1|DISC1	-1.4	MyList
Reactome Gene Sets	6	R-HSA-1640170	Cell Cycle		-2.5	1.9	3.2	30182	692	502	22	4.4	0.91	672|1780|3018|5433|5710|5711|5753|5862|5901|7311|7465|7532|8353|9088|29945|55320|63922|64326|80119|84296|84617|728642	BRCA1|DYNC1I1|H2BC3|POLR2D|PSMD4|PSMD5|PTK6|RAB2A|RAN|UBA52|WEE1|YWHAG|H3C6|PKMYT1|ANAPC4|MIS18BP1|CHTF18|COP1|PIF1|GINS4|TUBB6|CDK11A	-1.4	MyList
GO Biological Processes	19	GO:0045069	regulation of viral genome replication	19_GO:0016032 viral process	-2.5	4.2	3.9	30182	86	502	6	1.2	0.49	596|5886|6780|9869|10410|57169	BCL2|RAD23A|STAU1|SETDB1|IFITM3|ZNFX1	-1.4	MyList
Reactome Gene Sets	6	R-HSA-3858494	Beta-catenin independent WNT signaling		-2.5	3.3	3.6	30182	146	502	8	1.6	0.56	3845|4772|5710|5711|7311|7855|7976|8321	KRAS|NFATC1|PSMD4|PSMD5|UBA52|FZD5|FZD3|FZD1	-1.4	MyList
GO Biological Processes	19	GO:1903707	negative regulation of hemopoiesis	19_GO:0002376 immune system process	-2.5	3.7	3.7	30182	115	502	7	1.4	0.52	1493|2302|2624|3142|3902|6469|7001	CTLA4|FOXJ1|GATA2|HLX|LAG3|SHH|PRDX2	-1.4	MyList
GO Biological Processes	19	GO:0002886	regulation of myeloid leukocyte mediated immunity	19_GO:0002376 immune system process	-2.5	5	4	30182	60	502	5	1	0.44	1773|2242|2268|2624|5170	DNASE1|FES|FGR|GATA2|PDPK1	-1.4	MyList
GO Biological Processes	19	GO:0046579	positive regulation of Ras protein signal transduction	19_GO:0023052 signaling	-2.5	5	4	30182	60	502	5	1	0.44	2841|3845|9289|137735|157285	GPR18|KRAS|ADGRG1|ABRA|PRAG1	-1.4	MyList
Reactome Gene Sets	6	R-HSA-168638	NOD1/2 Signaling Pathway		-2.5	6.5	4.4	30182	37	502	4	0.8	0.4	3656|6300|7311|387522	IRAK2|MAPK12|UBA52|PEDS1-UBE2V1	-1.4	MyList
GO Biological Processes	19	GO:1904951	positive regulation of establishment of protein localization	19_GO:0051179 localization	-2.5	2.4	3.3	30182	324	502	13	2.6	0.71	2645|4826|5621|5901|6469|7855|8447|8660|9531|51201|57555|79752|118424	GCK|NNAT|PRNP|RAN|SHH|FZD5|DOC2B|IRS2|BAG3|ZDHHC2|NLGN2|ZFAND1|UBE2J2	-1.4	MyList
GO Biological Processes	19	GO:0060538	skeletal muscle organ development	19_GO:0032502 developmental process	-2.5	3.3	3.6	30182	147	502	8	1.6	0.56	596|858|3142|3845|5339|6469|30812|80208	BCL2|CAV2|HLX|KRAS|PLEC|SHH|SOX8|SPG11	-1.4	MyList
GO Biological Processes	19	GO:0043087	regulation of GTPase activity	19_GO:0065007 biological regulation	-2.5	2.3	3.3	30182	364	502	14	2.8	0.73	858|2302|3925|3987|5909|9236|9649|11033|11211|23216|56963|116986|161514|414062	CAV2|FOXJ1|STMN1|LIMS1|RAP1GAP|CCPG1|RALGPS1|ADAP1|FZD10|TBC1D1|RGMA|AGAP2|TBC1D21|CCL3L3	-1.4	MyList
GO Biological Processes	19	GO:0031503	protein-containing complex localization	19_GO:0051179 localization	-2.5	3.2	3.6	30182	148	502	8	1.6	0.56	5901|6780|7127|23059|50632|59283|91828|138151	RAN|STAU1|TNFAIP2|CLUAP1|CALY|CACNG8|EXOC3L4|NACC2	-1.4	MyList
GO Biological Processes	19	GO:0050865	regulation of cell activation	19_GO:0032501 multicellular organismal process	-2.5	1.9	3.1	30182	655	502	21	4.2	0.89	596|1493|1725|2242|2268|2302|2624|3142|3662|3902|3932|4323|5170|5621|6469|7001|8660|26191|55626|115650|283234	BCL2|CTLA4|DHPS|FES|FGR|FOXJ1|GATA2|HLX|IRF4|LAG3|LCK|MMP14|PDPK1|PRNP|SHH|PRDX2|IRS2|PTPN22|AMBRA1|TNFRSF13C|CCDC88B	-1.4	MyList
KEGG Pathway	24	hsa04360	Axon guidance		-2.4	3	3.5	30182	182	502	9	1.8	0.59	2242|3845|5170|6387|6469|7976|54910|56963|64218	FES|KRAS|PDPK1|CXCL12|SHH|FZD3|SEMA4C|RGMA|SEMA4A	-1.4	MyList
GO Biological Processes	19	GO:0060716	labyrinthine layer blood vessel development	19_GO:0032502 developmental process	-2.4	9.5	4.8	30182	19	502	3	0.6	0.34	7855|22846|79893	FZD5|VASH1|GGNBP2	-1.4	MyList
GO Biological Processes	19	GO:0060216	definitive hemopoiesis	19_GO:0032502 developmental process	-2.4	9.5	4.8	30182	19	502	3	0.6	0.34	2624|3213|7010	GATA2|HOXB3|TEK	-1.4	MyList
GO Biological Processes	19	GO:2001135	regulation of endocytic recycling	19_GO:0051179 localization	-2.4	9.5	4.8	30182	19	502	3	0.6	0.34	10079|10938|51201	ATP9A|EHD1|ZDHHC2	-1.4	MyList
GO Biological Processes	19	GO:1904036	negative regulation of epithelial cell apoptotic process	19_GO:0048519 negative regulation of biological process	-2.4	4.8	3.9	30182	62	502	5	1	0.44	596|2624|4780|5170|7010	BCL2|GATA2|NFE2L2|PDPK1|TEK	-1.3	MyList
GO Biological Processes	19	GO:2000177	regulation of neural precursor cell proliferation	19_GO:0050789 regulation of biological process	-2.4	4.1	3.8	30182	89	502	6	1.2	0.49	2624|6469|7976|8326|9289|27185	GATA2|SHH|FZD3|FZD9|ADGRG1|DISC1	-1.3	MyList
GO Biological Processes	19	GO:0048562	embryonic organ morphogenesis	19_GO:0032502 developmental process	-2.4	2.5	3.3	30182	292	502	12	2.4	0.68	2299|2624|3142|3199|3202|3213|4323|6469|7855|7976|23059|79977	FOXI1|GATA2|HLX|HOXA2|HOXA5|HOXB3|MMP14|SHH|FZD5|FZD3|CLUAP1|GRHL2	-1.3	MyList
GO Biological Processes	19	GO:0045834	positive regulation of lipid metabolic process	19_GO:0048518 positive regulation of biological process	-2.4	3.2	3.5	30182	151	502	8	1.6	0.56	1917|2268|5447|7010|8660|55626|60481|116986	EEF1A2|FGR|POR|TEK|IRS2|AMBRA1|ELOVL5|AGAP2	-1.3	MyList
GO Biological Processes	19	GO:0016525	negative regulation of angiogenesis	19_GO:0032502 developmental process	-2.4	3.2	3.5	30182	151	502	8	1.6	0.56	2296|3202|4879|5176|7010|22846|64218|64855	FOXC1|HOXA5|NPPB|SERPINF1|TEK|VASH1|SEMA4A|NIBAN2	-1.3	MyList
GO Biological Processes	19	GO:0010821	regulation of mitochondrion organization	19_GO:0050789 regulation of biological process	-2.4	3.2	3.5	30182	151	502	8	1.6	0.56	664|7855|8326|10645|27141|55486|55626|201164	BNIP3|FZD5|FZD9|CAMKK2|CIDEB|PARL|AMBRA1|PLD6	-1.3	MyList
GO Biological Processes	19	GO:0001775	cell activation	19_GO:0032501 multicellular organismal process	-2.4	1.9	3.1	30182	705	502	22	4.4	0.91	566|596|925|1525|1773|2529|2841|3142|3662|3683|3902|3932|6469|6794|7001|7855|8326|10672|22904|23228|26191|64218	AZU1|BCL2|CD8A|CXADR|DNASE1|FUT7|GPR18|HLX|IRF4|ITGAL|LAG3|LCK|SHH|STK11|PRDX2|FZD5|FZD9|GNA13|SBNO2|PLCL2|PTPN22|SEMA4A	-1.3	MyList
GO Biological Processes	19	GO:0045445	myoblast differentiation	19_GO:0032502 developmental process	-2.4	6.2	4.2	30182	39	502	4	0.8	0.4	2034|5339|6300|6469	EPAS1|PLEC|MAPK12|SHH	-1.3	MyList
Reactome Gene Sets	6	R-HSA-73933	Resolution of Abasic Sites (AP sites)		-2.4	6.2	4.2	30182	39	502	4	0.8	0.4	328|4350|4968|79661	APEX1|MPG|OGG1|NEIL1	-1.3	MyList
GO Biological Processes	19	GO:0021879	forebrain neuron differentiation	19_GO:0032502 developmental process	-2.4	6.2	4.2	30182	39	502	4	0.8	0.4	2624|8828|26468|27185	GATA2|NRP2|LHX6|DISC1	-1.3	MyList
GO Biological Processes	19	GO:0001936	regulation of endothelial cell proliferation	19_GO:0050789 regulation of biological process	-2.4	2.9	3.4	30182	185	502	9	1.8	0.59	858|2624|5170|6387|7010|8828|22846|51157|116844	CAV2|GATA2|PDPK1|CXCL12|TEK|NRP2|VASH1|ZNF580|LRG1	-1.3	MyList
GO Biological Processes	19	GO:0032663	regulation of interleukin-2 production	19_GO:0032501 multicellular organismal process	-2.4	4.8	3.9	30182	63	502	5	1	0.44	3662|3902|5621|7186|9454	IRF4|LAG3|PRNP|TRAF2|HOMER3	-1.3	MyList
Reactome Gene Sets	6	R-HSA-202403	TCR signaling		-2.4	3.5	3.6	30182	120	502	7	1.4	0.52	3932|5170|5710|5711|7311|26191|387522	LCK|PDPK1|PSMD4|PSMD5|UBA52|PTPN22|PEDS1-UBE2V1	-1.3	MyList
GO Biological Processes	19	GO:0060537	muscle tissue development	19_GO:0032502 developmental process	-2.4	2.3	3.2	30182	333	502	13	2.6	0.71	596|858|1525|2242|2296|3142|3845|4879|5339|6469|30008|30812|80208	BCL2|CAV2|CXADR|FES|FOXC1|HLX|KRAS|NPPB|PLEC|SHH|EFEMP2|SOX8|SPG11	-1.3	MyList
Reactome Gene Sets	6	R-HSA-71387	Metabolism of carbohydrates		-2.4	2.4	3.2	30182	295	502	12	2.4	0.68	28|2526|2529|2588|2645|3074|4125|4958|5209|6513|7311|126792	ABO|FUT4|FUT7|GALNS|GCK|HEXB|MAN2B1|OMD|PFKFB3|SLC2A1|UBA52|B3GALT6	-1.3	MyList
GO Biological Processes	19	GO:0034614	cellular response to reactive oxygen species	19_GO:0050896 response to stimulus	-2.4	3.5	3.6	30182	121	502	7	1.4	0.52	328|664|4780|7001|10645|51157|133522	APEX1|BNIP3|NFE2L2|PRDX2|CAMKK2|ZNF580|PPARGC1B	-1.3	MyList
GO Biological Processes	19	GO:2000181	negative regulation of blood vessel morphogenesis	19_GO:0032502 developmental process	-2.4	3.1	3.5	30182	153	502	8	1.6	0.56	2296|3202|4879|5176|7010|22846|64218|64855	FOXC1|HOXA5|NPPB|SERPINF1|TEK|VASH1|SEMA4A|NIBAN2	-1.3	MyList
GO Biological Processes	19	GO:0003013	circulatory system process	19_GO:0032501 multicellular organismal process	-2.4	2.1	3.1	30182	495	502	17	3.4	0.81	489|566|1522|2296|2837|4879|5339|5606|6387|6509|6513|6533|7010|10257|10672|66002|347148	ATP2A3|AZU1|CTSZ|FOXC1|UTS2R|NPPB|PLEC|MAP2K3|CXCL12|SLC1A4|SLC2A1|SLC6A6|TEK|ABCC4|GNA13|CYP4F12|QRFP	-1.3	MyList
GO Biological Processes	19	GO:2000251	positive regulation of actin cytoskeleton reorganization	19_GO:0048518 positive regulation of biological process	-2.4	9	4.7	30182	20	502	3	0.6	0.34	1440|2242|7010	CSF3|FES|TEK	-1.3	MyList
GO Biological Processes	19	GO:0046794	transport of virus	19_GO:0016032 viral process	-2.4	9	4.7	30182	20	502	3	0.6	0.34	858|6993|90861	CAV2|DYNLT1|JPT2	-1.3	MyList
GO Biological Processes	19	GO:0048643	positive regulation of skeletal muscle tissue development	19_GO:0032502 developmental process	-2.4	9	4.7	30182	20	502	3	0.6	0.34	596|6469|64855	BCL2|SHH|NIBAN2	-1.3	MyList
Reactome Gene Sets	6	R-HSA-372790	Signaling by GPCR		-2.4	1.9	3	30182	710	502	22	4.4	0.91	389|1815|2834|2837|2841|2862|3845|5170|5733|6387|6469|7855|7976|8321|8326|10645|10672|11211|53831|84634|347148|414062	RHOC|DRD4|PRLHR|UTS2R|GPR18|MLNR|KRAS|PDPK1|PTGER3|CXCL12|SHH|FZD5|FZD3|FZD1|FZD9|CAMKK2|GNA13|FZD10|GPR84|KISS1R|QRFP|CCL3L3	-1.3	MyList
GO Biological Processes	19	GO:1901532	regulation of hematopoietic progenitor cell differentiation	19_GO:0032502 developmental process	-2.4	6	4.1	30182	40	502	4	0.8	0.4	2296|2624|4780|5008	FOXC1|GATA2|NFE2L2|OSM	-1.3	MyList
GO Biological Processes	19	GO:1904994	regulation of leukocyte adhesion to vascular endothelial cell	19_GO:0050789 regulation of biological process	-2.4	6	4.1	30182	40	502	4	0.8	0.4	1991|2526|2529|6387	ELANE|FUT4|FUT7|CXCL12	-1.3	MyList
Reactome Gene Sets	6	R-HSA-6783310	Fanconi Anemia Pathway		-2.4	6	4.1	30182	40	502	4	0.8	0.4	2178|7311|84464|199990	FANCE|UBA52|SLX4|FAAP20	-1.3	MyList
GO Biological Processes	19	GO:1901343	negative regulation of vasculature development	19_GO:0032502 developmental process	-2.4	3.1	3.4	30182	154	502	8	1.6	0.56	2296|3202|4879|5176|7010|22846|64218|64855	FOXC1|HOXA5|NPPB|SERPINF1|TEK|VASH1|SEMA4A|NIBAN2	-1.3	MyList
GO Biological Processes	19	GO:0046434	organophosphate catabolic process	19_GO:0008152 metabolic process	-2.4	3.1	3.4	30182	154	502	8	1.6	0.56	3613|4968|5337|10591|51573|79661|83594|254552	IMPA2|OGG1|PLD1|DNPH1|GDE1|NEIL1|NUDT12|NUDT8	-1.3	MyList
Reactome Gene Sets	6	R-HSA-8939211	ESR-mediated signaling		-2.4	2.7	3.3	30182	223	502	10	2	0.62	596|858|3018|3845|5170|5433|5536|6387|8353|10498	BCL2|CAV2|H2BC3|KRAS|PDPK1|POLR2D|PPP5C|CXCL12|H3C6|CARM1	-1.3	MyList
GO Biological Processes	19	GO:0002698	negative regulation of immune effector process	19_GO:0002376 immune system process	-2.4	3.4	3.5	30182	122	502	7	1.4	0.52	54|966|1379|2302|3142|10225|124626	ACP5|CD59|CR1L|FOXJ1|HLX|CD96|ZPBP2	-1.3	MyList
Reactome Gene Sets	6	R-HSA-4086400	PCP/CE pathway		-2.4	3.9	3.6	30182	92	502	6	1.2	0.49	5710|5711|7311|7855|7976|8321	PSMD4|PSMD5|UBA52|FZD5|FZD3|FZD1	-1.3	MyList
GO Biological Processes	19	GO:0010035	response to inorganic substance	19_GO:0050896 response to stimulus	-2.4	2	3.1	30182	540	502	18	3.6	0.83	328|368|596|664|682|3613|4780|4968|5176|5339|5536|5621|6469|7001|7186|51157|79752|90019	APEX1|ABCC6|BCL2|BNIP3|BSG|IMPA2|NFE2L2|OGG1|SERPINF1|PLEC|PPP5C|PRNP|SHH|PRDX2|TRAF2|ZNF580|ZFAND1|SYT8	-1.3	MyList
GO Biological Processes	19	GO:0033157	regulation of intracellular protein transport	19_GO:0051179 localization	-2.3	2.7	3.3	30182	224	502	10	2	0.62	5621|5901|6469|7855|9531|10023|51201|55486|79752|118424	PRNP|RAN|SHH|FZD5|BAG3|FRAT1|ZDHHC2|PARL|ZFAND1|UBE2J2	-1.3	MyList
GO Biological Processes	19	GO:0034599	cellular response to oxidative stress	19_GO:0050896 response to stimulus	-2.3	2.7	3.3	30182	224	502	10	2	0.62	328|596|664|2034|4780|6780|7001|10645|51157|133522	APEX1|BCL2|BNIP3|EPAS1|NFE2L2|STAU1|PRDX2|CAMKK2|ZNF580|PPARGC1B	-1.3	MyList
Reactome Gene Sets	6	R-HSA-8873719	RAB geranylgeranylation		-2.3	4.6	3.8	30182	65	502	5	1	0.44	5862|5867|5869|57799|83871	RAB2A|RAB4A|RAB5B|RAB40C|RAB34	-1.3	MyList
Reactome Gene Sets	6	R-HSA-5358346	Hedgehog ligand biogenesis		-2.3	4.6	3.8	30182	65	502	5	1	0.44	5710|5711|6469|7311|147111	PSMD4|PSMD5|SHH|UBA52|NOTUM	-1.3	MyList
GO Biological Processes	19	GO:0090316	positive regulation of intracellular protein transport	19_GO:0051179 localization	-2.3	3.1	3.4	30182	155	502	8	1.6	0.56	5621|5901|6469|7855|9531|51201|79752|118424	PRNP|RAN|SHH|FZD5|BAG3|ZDHHC2|ZFAND1|UBE2J2	-1.3	MyList
GO Biological Processes	19	GO:0050863	regulation of T cell activation	19_GO:0002376 immune system process	-2.3	2.2	3.1	30182	377	502	14	2.8	0.73	1493|1725|2302|3142|3662|3902|3932|5621|6469|7001|26191|55626|115650|283234	CTLA4|DHPS|FOXJ1|HLX|IRF4|LAG3|LCK|PRNP|SHH|PRDX2|PTPN22|AMBRA1|TNFRSF13C|CCDC88B	-1.3	MyList
KEGG Pathway	24	hsa05323	Rheumatoid arthritis		-2.3	3.9	3.6	30182	93	502	6	1.2	0.49	54|1493|3683|6387|7010|414062	ACP5|CTLA4|ITGAL|CXCL12|TEK|CCL3L3	-1.3	MyList
GO Biological Processes	19	GO:0060249	anatomical structure homeostasis	19_GO:0042592 homeostatic process	-2.3	2.7	3.3	30182	225	502	10	2	0.62	54|596|1525|2296|2624|3845|6513|6794|79738|158046	ACP5|BCL2|CXADR|FOXC1|GATA2|KRAS|SLC2A1|STK11|BBS10|NXNL2	-1.3	MyList
GO Biological Processes	19	GO:0001894	tissue homeostasis	19_GO:0042592 homeostatic process	-2.3	2.7	3.3	30182	225	502	10	2	0.62	54|596|1525|2296|2624|3845|6513|6794|79738|158046	ACP5|BCL2|CXADR|FOXC1|GATA2|KRAS|SLC2A1|STK11|BBS10|NXNL2	-1.3	MyList
GO Biological Processes	19	GO:0045596	negative regulation of cell differentiation	19_GO:0032502 developmental process	-2.3	1.8	3	30182	716	502	22	4.4	0.91	1493|2302|2624|3142|3199|3202|3845|3902|4772|4780|5909|6469|6993|7001|9274|25819|29956|30812|54910|64218|79755|79977	CTLA4|FOXJ1|GATA2|HLX|HOXA2|HOXA5|KRAS|LAG3|NFATC1|NFE2L2|RAP1GAP|SHH|DYNLT1|PRDX2|BCL7C|NOCT|CERS2|SOX8|SEMA4C|SEMA4A|ZNF750|GRHL2	-1.3	MyList
GO Biological Processes	19	GO:0048667	cell morphogenesis involved in neuron differentiation	19_GO:0032502 developmental process	-2.3	2.2	3.1	30182	418	502	15	3	0.76	596|3199|3925|6387|6469|6794|7976|8828|23237|54538|54910|64218|64855|80208|113246	BCL2|HOXA2|STMN1|CXCL12|SHH|STK11|FZD3|NRP2|ARC|ROBO4|SEMA4C|SEMA4A|NIBAN2|SPG11|C12orf57	-1.3	MyList
GO Biological Processes	19	GO:0071526	semaphorin-plexin signaling pathway	19_GO:0023052 signaling	-2.3	5.9	4.1	30182	41	502	4	0.8	0.4	8828|9855|54910|64218	NRP2|FARP2|SEMA4C|SEMA4A	-1.3	MyList
GO Biological Processes	19	GO:0002691	regulation of cellular extravasation	19_GO:0040011 locomotion	-2.3	5.9	4.1	30182	41	502	4	0.8	0.4	1991|2526|2529|6387	ELANE|FUT4|FUT7|CXCL12	-1.3	MyList
GO Biological Processes	19	GO:0006284	base-excision repair	19_GO:0050896 response to stimulus	-2.3	5.9	4.1	30182	41	502	4	0.8	0.4	328|4350|4968|79661	APEX1|MPG|OGG1|NEIL1	-1.3	MyList
GO Biological Processes	19	GO:0007566	embryo implantation	19_GO:0022414 reproductive process	-2.3	5.9	4.1	30182	41	502	4	0.8	0.4	682|780|2529|3976	BSG|DDR1|FUT7|LIF	-1.3	MyList
GO Biological Processes	19	GO:0035272	exocrine system development	19_GO:0032502 developmental process	-2.3	5.9	4.1	30182	41	502	4	0.8	0.4	2296|3321|6469|80004	FOXC1|IGSF3|SHH|ESRP2	-1.3	MyList
KEGG Pathway	24	hsa04613	Neutrophil extracellular trap formation		-2.3	2.8	3.3	30182	190	502	9	1.8	0.59	566|1379|1991|3018|3683|6300|8353|55506|79792	AZU1|CR1L|ELANE|H2BC3|ITGAL|MAPK12|H3C6|MACROH2A2|GSDMD	-1.3	MyList
KEGG Pathway	24	hsa00770	Pantothenate and CoA biosynthesis		-2.3	8.6	4.5	30182	21	502	3	0.6	0.34	224|587|339896	ALDH3A2|BCAT2|GADL1	-1.3	MyList
GO Biological Processes	19	GO:0034122	negative regulation of toll-like receptor signaling pathway	19_GO:0044419 biological process involved in interspecies interaction between organisms	-2.3	8.6	4.5	30182	21	502	3	0.6	0.34	3662|5170|55366	IRF4|PDPK1|LGR4	-1.3	MyList
GO Biological Processes	19	GO:0071498	cellular response to fluid shear stress	19_GO:0050896 response to stimulus	-2.3	8.6	4.5	30182	21	502	3	0.6	0.34	4780|5339|9788	NFE2L2|PLEC|MTSS1	-1.3	MyList
Reactome Gene Sets	6	R-HSA-4641263	Regulation of FZD by ubiquitination		-2.3	8.6	4.5	30182	21	502	3	0.6	0.34	7311|7855|55366	UBA52|FZD5|LGR4	-1.3	MyList
GO Biological Processes	19	GO:0034587	piRNA processing	19_GO:0048519 negative regulation of biological process	-2.3	8.6	4.5	30182	21	502	3	0.6	0.34	54456|113802|201164	MOV10L1|HENMT1|PLD6	-1.3	MyList
GO Biological Processes	19	GO:1903312	negative regulation of mRNA metabolic process	19_GO:0048519 negative regulation of biological process	-2.3	3.8	3.6	30182	94	502	6	1.2	0.49	1153|7186|11187|25819|55603|115572	CIRBP|TRAF2|PKP3|NOCT|TENT5A|TENT5B	-1.3	MyList
GO Biological Processes	19	GO:0010976	positive regulation of neuron projection development	19_GO:0032502 developmental process	-2.3	3.1	3.4	30182	157	502	8	1.6	0.56	780|2242|4780|5176|5753|8321|10938|27185	DDR1|FES|NFE2L2|SERPINF1|PTK6|FZD1|EHD1|DISC1	-1.3	MyList
GO Biological Processes	19	GO:0044089	positive regulation of cellular component biogenesis	19_GO:0048518 positive regulation of biological process	-2.3	2	3	30182	503	502	17	3.4	0.81	389|1440|2242|3987|7010|8115|9788|9869|26191|49856|50632|54443|55626|57555|64218|84464|441381	RHOC|CSF3|FES|LIMS1|TEK|TCL1A|MTSS1|SETDB1|PTPN22|WRAP73|CALY|ANLN|AMBRA1|NLGN2|SEMA4A|SLX4|LRRC24	-1.3	MyList
GO Biological Processes	19	GO:0001952	regulation of cell-matrix adhesion	19_GO:0050789 regulation of biological process	-2.3	3.4	3.4	30182	125	502	7	1.4	0.52	596|780|3987|4323|7010|27185|30008	BCL2|DDR1|LIMS1|MMP14|TEK|DISC1|EFEMP2	-1.3	MyList
GO Biological Processes	19	GO:0030029	actin filament-based process	19_GO:0009987 cellular process	-2.3	1.9	3	30182	589	502	19	3.8	0.85	596|1525|2302|3845|5170|5339|5901|9788|9855|10049|50853|54443|54509|57553|64236|79767|116986|133522|133746	BCL2|CXADR|FOXJ1|KRAS|PDPK1|PLEC|RAN|MTSS1|FARP2|DNAJB6|VILL|ANLN|RHOF|MICAL3|PDLIM2|ELMO3|AGAP2|PPARGC1B|JMY	-1.3	MyList
GO Biological Processes	19	GO:0000226	microtubule cytoskeleton organization	19_GO:0009987 cellular process	-2.3	2	3	30182	547	502	18	3.6	0.83	672|1731|2242|2302|3832|3925|5901|6993|7465|9611|23059|27185|49856|79582|84223|84617|161514|283234	BRCA1|SEPTIN1|FES|FOXJ1|KIF11|STMN1|RAN|DYNLT1|WEE1|NCOR1|CLUAP1|DISC1|WRAP73|SPAG16|IQCG|TUBB6|TBC1D21|CCDC88B	-1.3	MyList
GO Biological Processes	19	GO:0055086	nucleobase-containing small molecule metabolic process	19_GO:0008152 metabolic process	-2.3	1.9	3	30182	590	502	19	3.8	0.85	368|2645|4199|4728|4879|4968|5901|10591|25819|28992|51005|60481|79661|80221|83594|93100|221264|254552|790955	ABCC6|GCK|ME1|NDUFS8|NPPB|OGG1|RAN|DNPH1|NOCT|MACROD1|AMDHD2|ELOVL5|NEIL1|ACSF2|NUDT12|NAPRT|AK9|NUDT8|UQCC3	-1.3	MyList
GO Biological Processes	19	GO:0032989	cellular component morphogenesis	19_GO:0032502 developmental process	-2.3	1.9	3	30182	590	502	19	3.8	0.85	596|780|3199|3925|5339|6387|6469|6794|7465|7976|8828|23237|54538|54910|64218|64855|80208|113246|124626	BCL2|DDR1|HOXA2|STMN1|PLEC|CXCL12|SHH|STK11|WEE1|FZD3|NRP2|ARC|ROBO4|SEMA4C|SEMA4A|NIBAN2|SPG11|C12orf57|ZPBP2	-1.3	MyList
GO Biological Processes	19	GO:0003018	vascular process in circulatory system	19_GO:0032501 multicellular organismal process	-2.3	2.5	3.2	30182	265	502	11	2.2	0.65	489|566|2296|2837|4879|5339|6509|6513|6533|7010|10257	ATP2A3|AZU1|FOXC1|UTS2R|NPPB|PLEC|SLC1A4|SLC2A1|SLC6A6|TEK|ABCC4	-1.3	MyList
GO Biological Processes	19	GO:0002066	columnar/cuboidal epithelial cell development	19_GO:0032502 developmental process	-2.3	5.7	4	30182	42	502	4	0.8	0.4	2624|3202|5170|7855	GATA2|HOXA5|PDPK1|FZD5	-1.3	MyList
GO Biological Processes	19	GO:0035282	segmentation	19_GO:0032502 developmental process	-2.3	3.8	3.6	30182	95	502	6	1.2	0.49	2296|3199|6469|7855|8828|201164	FOXC1|HOXA2|SHH|FZD5|NRP2|PLD6	-1.3	MyList
Reactome Gene Sets	6	R-HSA-5625740	RHO GTPases activate PKNs		-2.3	3.8	3.6	30182	95	502	6	1.2	0.49	389|3018|5170|7532|8353|29941	RHOC|H2BC3|PDPK1|YWHAG|H3C6|PKN3	-1.3	MyList
GO Biological Processes	19	GO:0006304	DNA modification	19_GO:0008152 metabolic process	-2.3	3.8	3.6	30182	95	502	6	1.2	0.49	328|4350|4968|54456|79661|201164	APEX1|MPG|OGG1|MOV10L1|NEIL1|PLD6	-1.3	MyList
Reactome Gene Sets	6	R-HSA-373080	Class B/2 (Secretin family receptors)		-2.3	3.8	3.6	30182	95	502	6	1.2	0.49	6469|7855|7976|8321|8326|11211	SHH|FZD5|FZD3|FZD1|FZD9|FZD10	-1.3	MyList
GO Biological Processes	19	GO:0070613	regulation of protein processing	19_GO:0008152 metabolic process	-2.3	4.5	3.7	30182	67	502	5	1	0.44	302|1522|4241|4323|5621	ANXA2|CTSZ|MELTF|MMP14|PRNP	-1.3	MyList
GO Biological Processes	19	GO:0045664	regulation of neuron differentiation	19_GO:0032502 developmental process	-2.3	2.8	3.3	30182	193	502	9	1.8	0.59	596|2624|3199|5909|6387|6469|7532|30812|147040	BCL2|GATA2|HOXA2|RAP1GAP|CXCL12|SHH|YWHAG|SOX8|KCTD11	-1.3	MyList
GO Biological Processes	19	GO:0044772	mitotic cell cycle phase transition	19_GO:0009987 cellular process	-2.3	3	3.3	30182	159	502	8	1.6	0.56	596|1018|2672|2935|7465|9088|23137|245711	BCL2|CDK3|GFI1|GSPT1|WEE1|PKMYT1|SMC5|SPDYA	-1.2	MyList
GO Biological Processes	19	GO:0017157	regulation of exocytosis	19_GO:0051179 localization	-2.3	2.8	3.3	30182	194	502	9	1.8	0.59	302|1731|2242|2268|2624|5170|8447|10079|90019	ANXA2|SEPTIN1|FES|FGR|GATA2|PDPK1|DOC2B|ATP9A|SYT8	-1.2	MyList
GO Biological Processes	19	GO:0032091	negative regulation of protein binding	19_GO:0065007 biological regulation	-2.3	3.8	3.5	30182	96	502	6	1.2	0.49	489|1522|4043|6815|27185|56963	ATP2A3|CTSZ|LRPAP1|STYX|DISC1|RGMA	-1.2	MyList
GO Biological Processes	19	GO:0006259	DNA metabolic process	19_GO:0008152 metabolic process	-2.3	1.8	2.9	30182	770	502	23	4.6	0.93	328|672|1773|2178|3104|4350|4968|5536|5886|5901|7517|9401|10498|23137|54456|63922|79661|80119|84296|84464|133746|199990|201164	APEX1|BRCA1|DNASE1|FANCE|ZBTB48|MPG|OGG1|PPP5C|RAD23A|RAN|XRCC3|RECQL4|CARM1|SMC5|MOV10L1|CHTF18|NEIL1|PIF1|GINS4|SLX4|JMY|FAAP20|PLD6	-1.2	MyList
GO Biological Processes	19	GO:0043489	RNA stabilization	19_GO:0048519 negative regulation of biological process	-2.3	4.4	3.7	30182	68	502	5	1	0.44	1153|7186|25819|55603|115572	CIRBP|TRAF2|NOCT|TENT5A|TENT5B	-1.2	MyList
GO Biological Processes	19	GO:0051057	positive regulation of small GTPase mediated signal transduction	19_GO:0023052 signaling	-2.3	4.4	3.7	30182	68	502	5	1	0.44	2841|3845|9289|137735|157285	GPR18|KRAS|ADGRG1|ABRA|PRAG1	-1.2	MyList
GO Biological Processes	19	GO:1903829	positive regulation of protein localization	19_GO:0051179 localization	-2.3	2.1	3	30182	467	502	16	3.2	0.78	2645|3976|4826|5170|5621|5901|6469|6794|7855|8447|8660|9531|51201|57555|79752|118424	GCK|LIF|NNAT|PDPK1|PRNP|RAN|SHH|STK11|FZD5|DOC2B|IRS2|BAG3|ZDHHC2|NLGN2|ZFAND1|UBE2J2	-1.2	MyList
Reactome Gene Sets	6	R-HSA-9033658	Blood group systems biosynthesis		-2.3	8.2	4.4	30182	22	502	3	0.6	0.34	28|2526|2529	ABO|FUT4|FUT7	-1.2	MyList
GO Biological Processes	19	GO:0060713	labyrinthine layer morphogenesis	19_GO:0032502 developmental process	-2.3	8.2	4.4	30182	22	502	3	0.6	0.34	7855|10049|79977	FZD5|DNAJB6|GRHL2	-1.2	MyList
GO Biological Processes	19	GO:0031345	negative regulation of cell projection organization	19_GO:0048519 negative regulation of biological process	-2.3	2.8	3.2	30182	195	502	9	1.8	0.59	2672|5621|5909|10498|29956|54910|56963|64218|157285	GFI1|PRNP|RAP1GAP|CARM1|CERS2|SEMA4C|RGMA|SEMA4A|PRAG1	-1.2	MyList
GO Biological Processes	19	GO:0045058	T cell selection	19_GO:0002376 immune system process	-2.3	5.6	3.9	30182	43	502	4	0.8	0.4	596|3662|6469|6794	BCL2|IRF4|SHH|STK11	-1.2	MyList
Canonical Pathways	11	M222	PID CXCR3 PATHWAY		-2.3	5.6	3.9	30182	43	502	4	0.8	0.4	3683|3845|5170|5606	ITGAL|KRAS|PDPK1|MAP2K3	-1.2	MyList
Reactome Gene Sets	6	R-HSA-9646399	Aggrephagy		-2.3	5.6	3.9	30182	43	502	4	0.8	0.4	1780|7311|84617|387522	DYNC1I1|UBA52|TUBB6|PEDS1-UBE2V1	-1.2	MyList
GO Biological Processes	19	GO:0008593	regulation of Notch signaling pathway	19_GO:0023052 signaling	-2.2	3.7	3.5	30182	97	502	6	1.2	0.49	1018|2624|4323|8788|64855|157285	CDK3|GATA2|MMP14|DLK1|NIBAN2|PRAG1	-1.2	MyList
Reactome Gene Sets	6	R-HSA-500792	GPCR ligand binding		-2.2	2.1	3	30182	469	502	16	3.2	0.78	1815|2834|2837|2841|2862|5733|6387|6469|7855|7976|8321|8326|11211|84634|347148|414062	DRD4|PRLHR|UTS2R|GPR18|MLNR|PTGER3|CXCL12|SHH|FZD5|FZD3|FZD1|FZD9|FZD10|KISS1R|QRFP|CCL3L3	-1.2	MyList
GO Biological Processes	19	GO:0010594	regulation of endothelial cell migration	19_GO:0040011 locomotion	-2.2	2.6	3.2	30182	232	502	10	2	0.62	2624|4780|5170|5176|5606|7010|8828|22846|51157|64218	GATA2|NFE2L2|PDPK1|SERPINF1|MAP2K3|TEK|NRP2|VASH1|ZNF580|SEMA4A	-1.2	MyList
KEGG Pathway	24	hsa04920	Adipocytokine signaling pathway		-2.2	4.4	3.6	30182	69	502	5	1	0.44	6513|6794|7186|8660|10645	SLC2A1|STK11|TRAF2|IRS2|CAMKK2	-1.2	MyList
Canonical Pathways	11	M121	PID MTOR 4PATHWAY		-2.2	4.4	3.6	30182	69	502	5	1	0.44	664|3845|5170|5337|7532	BNIP3|KRAS|PDPK1|PLD1|YWHAG	-1.2	MyList
Reactome Gene Sets	6	R-HSA-202424	Downstream TCR signaling		-2.2	3.7	3.5	30182	98	502	6	1.2	0.49	3932|5170|5710|5711|7311|387522	LCK|PDPK1|PSMD4|PSMD5|UBA52|PEDS1-UBE2V1	-1.2	MyList
KEGG Pathway	24	hsa01522	Endocrine resistance		-2.2	3.7	3.5	30182	98	502	6	1.2	0.49	596|3845|6300|9611|10498|399694	BCL2|KRAS|MAPK12|NCOR1|CARM1|SHC4	-1.2	MyList
GO Biological Processes	19	GO:1903214	regulation of protein targeting to mitochondrion	19_GO:0051179 localization	-2.2	5.5	3.9	30182	44	502	4	0.8	0.4	7855|9531|55486|118424	FZD5|BAG3|PARL|UBE2J2	-1.2	MyList
GO Biological Processes	19	GO:0033003	regulation of mast cell activation	19_GO:0002376 immune system process	-2.2	5.5	3.9	30182	44	502	4	0.8	0.4	2242|2268|2624|5170	FES|FGR|GATA2|PDPK1	-1.2	MyList
GO Biological Processes	19	GO:0009117	nucleotide metabolic process	19_GO:0008152 metabolic process	-2.2	2	2.9	30182	515	502	17	3.4	0.81	368|2645|4199|4728|4879|4968|5901|10591|25819|60481|79661|80221|83594|93100|221264|254552|790955	ABCC6|GCK|ME1|NDUFS8|NPPB|OGG1|RAN|DNPH1|NOCT|ELOVL5|NEIL1|ACSF2|NUDT12|NAPRT|AK9|NUDT8|UQCC3	-1.2	MyList
Reactome Gene Sets	6	R-HSA-6809371	Formation of the cornified envelope		-2.2	3.2	3.3	30182	130	502	7	1.4	0.52	3852|3872|3883|5493|6701|11187|64065	KRT5|KRT17|KRT33A|PPL|SPRR2B|PKP3|PERP	-1.2	MyList
GO Biological Processes	19	GO:0061333	renal tubule morphogenesis	19_GO:0032502 developmental process	-2.2	4.3	3.6	30182	70	502	5	1	0.44	596|6469|9788|30812|55366	BCL2|SHH|MTSS1|SOX8|LGR4	-1.2	MyList
GO Biological Processes	19	GO:0061351	neural precursor cell proliferation	19_GO:0009987 cellular process	-2.2	3.6	3.4	30182	99	502	6	1.2	0.49	2624|6469|7976|8326|9289|27185	GATA2|SHH|FZD3|FZD9|ADGRG1|DISC1	-1.2	MyList
Reactome Gene Sets	6	R-HSA-450321	JNK (c-Jun kinases) phosphorylation and activation mediated by activated human TAK1		-2.2	7.8	4.3	30182	23	502	3	0.6	0.34	3656|7311|387522	IRAK2|UBA52|PEDS1-UBE2V1	-1.2	MyList
GO Biological Processes	19	GO:0006809	nitric oxide biosynthetic process	19_GO:0008152 metabolic process	-2.2	7.8	4.3	30182	23	502	3	0.6	0.34	54|2644|23564	ACP5|GCHFR|DDAH2	-1.2	MyList
GO Biological Processes	19	GO:1903039	positive regulation of leukocyte cell-cell adhesion	19_GO:0048518 positive regulation of biological process	-2.2	2.4	3.1	30182	273	502	11	2.2	0.65	1725|1991|2526|2529|3142|3932|6469|26191|55626|115650|283234	DHPS|ELANE|FUT4|FUT7|HLX|LCK|SHH|PTPN22|AMBRA1|TNFRSF13C|CCDC88B	-1.2	MyList
GO Biological Processes	19	GO:0030099	myeloid cell differentiation	19_GO:0032502 developmental process	-2.2	2.4	3.1	30182	273	502	11	2.2	0.65	302|1053|1440|2034|2624|3662|3976|9855|22904|23456|51522	ANXA2|CEBPE|CSF3|EPAS1|GATA2|IRF4|LIF|FARP2|SBNO2|ABCB10|TMEM14C	-1.2	MyList
GO Biological Processes	19	GO:0010595	positive regulation of endothelial cell migration	19_GO:0040011 locomotion	-2.2	3.2	3.3	30182	131	502	7	1.4	0.52	2624|4780|5170|5606|7010|8828|51157	GATA2|NFE2L2|PDPK1|MAP2K3|TEK|NRP2|ZNF580	-1.2	MyList
KEGG Pathway	24	hsa04114	Oocyte meiosis		-2.2	3.2	3.3	30182	131	502	7	1.4	0.52	810|6300|7532|9088|29945|51806|245711	CALML3|MAPK12|YWHAG|PKMYT1|ANAPC4|CALML5|SPDYA	-1.2	MyList
Reactome Gene Sets	6	R-HSA-445989	TAK1-dependent IKK and NF-kappa-B activation		-2.2	5.3	3.8	30182	45	502	4	0.8	0.4	3656|7186|7311|387522	IRAK2|TRAF2|UBA52|PEDS1-UBE2V1	-1.2	MyList
GO Biological Processes	19	GO:1902692	regulation of neuroblast proliferation	19_GO:0032502 developmental process	-2.2	5.3	3.8	30182	45	502	4	0.8	0.4	2624|6469|7976|27185	GATA2|SHH|FZD3|DISC1	-1.2	MyList
GO Biological Processes	19	GO:0048483	autonomic nervous system development	19_GO:0032502 developmental process	-2.2	5.3	3.8	30182	45	502	4	0.8	0.4	3142|7976|8828|30812	HLX|FZD3|NRP2|SOX8	-1.2	MyList
GO Biological Processes	19	GO:0010970	transport along microtubule	19_GO:0051179 localization	-2.2	2.9	3.2	30182	165	502	8	1.6	0.56	1780|6780|9531|23059|50632|80208|84871|146439	DYNC1I1|STAU1|BAG3|CLUAP1|CALY|SPG11|AGBL4|BICDL2	-1.2	MyList
Canonical Pathways	11	M124	PID CXCR4 PATHWAY		-2.2	3.6	3.4	30182	100	502	6	1.2	0.49	389|2268|3932|5170|6387|10672	RHOC|FGR|LCK|PDPK1|CXCL12|GNA13	-1.2	MyList
GO Biological Processes	19	GO:0019362	pyridine nucleotide metabolic process	19_GO:0008152 metabolic process	-2.2	4.2	3.5	30182	71	502	5	1	0.44	2645|4199|25819|83594|93100	GCK|ME1|NOCT|NUDT12|NAPRT	-1.2	MyList
GO Biological Processes	19	GO:0046496	nicotinamide nucleotide metabolic process	19_GO:0008152 metabolic process	-2.2	4.2	3.5	30182	71	502	5	1	0.44	2645|4199|25819|83594|93100	GCK|ME1|NOCT|NUDT12|NAPRT	-1.2	MyList
GO Biological Processes	19	GO:1903317	regulation of protein maturation	19_GO:0008152 metabolic process	-2.2	4.2	3.5	30182	71	502	5	1	0.44	302|1522|4241|4323|5621	ANXA2|CTSZ|MELTF|MMP14|PRNP	-1.2	MyList
GO Biological Processes	19	GO:0048565	digestive tract development	19_GO:0032502 developmental process	-2.2	3.2	3.3	30182	132	502	7	1.4	0.52	596|3142|3202|5753|6469|7855|55366	BCL2|HLX|HOXA5|PTK6|SHH|FZD5|LGR4	-1.2	MyList
KEGG Pathway	24	hsa04151	PI3K-Akt signaling pathway		-2.2	2.2	3	30182	354	502	13	2.6	0.71	596|672|1299|1440|3845|5008|5170|6794|7010|7532|8115|9180|29941	BCL2|BRCA1|COL9A3|CSF3|KRAS|OSM|PDPK1|STK11|TEK|YWHAG|TCL1A|OSMR|PKN3	-1.2	MyList
GO Biological Processes	19	GO:0007610	behavior	19_GO:0032501 multicellular organismal process	-2.2	1.9	2.9	30182	607	502	19	3.8	0.85	596|1815|2834|3074|3845|4125|5176|5621|6387|6414|8326|9611|23237|57468|57555|80208|84502|113246|347148	BCL2|DRD4|PRLHR|HEXB|KRAS|MAN2B1|SERPINF1|PRNP|CXCL12|SELENOP|FZD9|NCOR1|ARC|SLC12A5|NLGN2|SPG11|JPH4|C12orf57|QRFP	-1.2	MyList
Reactome Gene Sets	6	R-HSA-5607764	CLEC7A (Dectin-1) signaling		-2.2	3.6	3.4	30182	101	502	6	1.2	0.49	4772|5170|5710|5711|7311|387522	NFATC1|PDPK1|PSMD4|PSMD5|UBA52|PEDS1-UBE2V1	-1.2	MyList
GO Biological Processes	19	GO:0002695	negative regulation of leukocyte activation	19_GO:0002376 immune system process	-2.2	2.7	3.1	30182	202	502	9	1.8	0.59	1493|2268|2302|3142|3902|5621|6469|7001|26191	CTLA4|FGR|FOXJ1|HLX|LAG3|PRNP|SHH|PRDX2|PTPN22	-1.2	MyList
GO Biological Processes	19	GO:0014902	myotube differentiation	19_GO:0032502 developmental process	-2.2	4.2	3.5	30182	72	502	5	1	0.44	596|858|5339|6469|80208	BCL2|CAV2|PLEC|SHH|SPG11	-1.2	MyList
GO Biological Processes	19	GO:0050670	regulation of lymphocyte proliferation	19_GO:0002376 immune system process	-2.2	2.5	3.1	30182	239	502	10	2	0.62	596|1493|1725|2302|5621|6469|8660|26191|115650|283234	BCL2|CTLA4|DHPS|FOXJ1|PRNP|SHH|IRS2|PTPN22|TNFRSF13C|CCDC88B	-1.2	MyList
Reactome Gene Sets	6	R-HSA-69481	G2/M Checkpoints		-2.2	2.9	3.2	30182	167	502	8	1.6	0.56	672|3018|5710|5711|7311|7465|7532|9088	BRCA1|H2BC3|PSMD4|PSMD5|UBA52|WEE1|YWHAG|PKMYT1	-1.2	MyList
GO Biological Processes	19	GO:0040017	positive regulation of locomotion	19_GO:0040011 locomotion	-2.2	1.9	2.8	30182	609	502	19	3.8	0.85	389|566|596|2268|2526|2529|2624|4323|4780|5170|5606|6387|7010|8660|8828|51157|54910|64218|286077	RHOC|AZU1|BCL2|FGR|FUT4|FUT7|GATA2|MMP14|NFE2L2|PDPK1|MAP2K3|CXCL12|TEK|IRS2|NRP2|ZNF580|SEMA4C|SEMA4A|FAM83H	-1.2	MyList
GO Biological Processes	19	GO:1901861	regulation of muscle tissue development	19_GO:0032502 developmental process	-2.1	5.2	3.7	30182	46	502	4	0.8	0.4	596|6469|57496|64855	BCL2|SHH|MRTFB|NIBAN2	-1.2	MyList
GO Biological Processes	19	GO:0021884	forebrain neuron development	19_GO:0032502 developmental process	-2.1	7.5	4.2	30182	24	502	3	0.6	0.34	8828|26468|27185	NRP2|LHX6|DISC1	-1.2	MyList
GO Biological Processes	19	GO:0002360	T cell lineage commitment	19_GO:0002376 immune system process	-2.1	7.5	4.2	30182	24	502	3	0.6	0.34	596|3662|6469	BCL2|IRF4|SHH	-1.2	MyList
Reactome Gene Sets	6	R-HSA-6783589	Interleukin-6 family signaling		-2.1	7.5	4.2	30182	24	502	3	0.6	0.34	3976|5008|9180	LIF|OSM|OSMR	-1.2	MyList
GO Biological Processes	19	GO:0006753	nucleoside phosphate metabolic process	19_GO:0008152 metabolic process	-2.1	2	2.9	30182	523	502	17	3.4	0.81	368|2645|4199|4728|4879|4968|5901|10591|25819|60481|79661|80221|83594|93100|221264|254552|790955	ABCC6|GCK|ME1|NDUFS8|NPPB|OGG1|RAN|DNPH1|NOCT|ELOVL5|NEIL1|ACSF2|NUDT12|NAPRT|AK9|NUDT8|UQCC3	-1.2	MyList
GO Biological Processes	19	GO:0000278	mitotic cell cycle	19_GO:0009987 cellular process	-2.1	1.9	2.8	30182	610	502	19	3.8	0.85	389|596|672|1018|2672|2935|3832|3925|5536|5901|6993|7465|9088|23137|49856|54443|84617|245711|728642	RHOC|BCL2|BRCA1|CDK3|GFI1|GSPT1|KIF11|STMN1|PPP5C|RAN|DYNLT1|WEE1|PKMYT1|SMC5|WRAP73|ANLN|TUBB6|SPDYA|CDK11A	-1.2	MyList
GO Biological Processes	19	GO:0006643	membrane lipid metabolic process	19_GO:0008152 metabolic process	-2.1	2.7	3.1	30182	203	502	9	1.8	0.59	2529|3074|7357|8818|29956|60481|84002|124626|124976	FUT7|HEXB|UGCG|DPM2|CERS2|ELOVL5|B3GNT5|ZPBP2|SPNS2	-1.2	MyList
Reactome Gene Sets	6	R-HSA-5668541	TNFR2 non-canonical NF-kB pathway		-2.1	3.5	3.3	30182	102	502	6	1.2	0.49	5710|5711|7186|7311|8771|115650	PSMD4|PSMD5|TRAF2|UBA52|TNFRSF6B|TNFRSF13C	-1.1	MyList
GO Biological Processes	19	GO:0050890	cognition	19_GO:0032501 multicellular organismal process	-2.1	2.3	3	30182	317	502	12	2.4	0.68	874|3845|4125|5176|5621|6509|8326|23237|57468|80208|84502|113246	CBR3|KRAS|MAN2B1|SERPINF1|PRNP|SLC1A4|FZD9|ARC|SLC12A5|SPG11|JPH4|C12orf57	-1.1	MyList
Reactome Gene Sets	6	R-HSA-2454202	Fc epsilon receptor (FCERI) signaling		-2.1	3.1	3.2	30182	134	502	7	1.4	0.52	3845|4772|5170|5710|5711|7311|387522	KRAS|NFATC1|PDPK1|PSMD4|PSMD5|UBA52|PEDS1-UBE2V1	-1.1	MyList
GO Biological Processes	19	GO:0072073	kidney epithelium development	19_GO:0032502 developmental process	-2.1	3.1	3.2	30182	134	502	7	1.4	0.52	596|2296|2302|6469|9788|30812|55366	BCL2|FOXC1|FOXJ1|SHH|MTSS1|SOX8|LGR4	-1.1	MyList
GO Biological Processes	19	GO:0015698	inorganic anion transport	19_GO:0051179 localization	-2.1	2.9	3.1	30182	168	502	8	1.6	0.56	368|439|6509|9022|10257|10723|57468|266675	ABCC6|GET3|SLC1A4|CLIC3|ABCC4|SLC12A7|SLC12A5|BEST4	-1.1	MyList
GO Biological Processes	19	GO:0009952	anterior/posterior pattern specification	19_GO:0032502 developmental process	-2.1	2.7	3.1	30182	204	502	9	1.8	0.59	2296|3199|3202|3213|6469|7855|23237|54626|201164	FOXC1|HOXA2|HOXA5|HOXB3|SHH|FZD5|ARC|HES2|PLD6	-1.1	MyList
GO Biological Processes	19	GO:0030335	positive regulation of cell migration	19_GO:0040011 locomotion	-2.1	1.9	2.8	30182	569	502	18	3.6	0.83	389|596|2268|2526|2529|2624|4323|4780|5170|5606|6387|7010|8660|8828|51157|54910|64218|286077	RHOC|BCL2|FGR|FUT4|FUT7|GATA2|MMP14|NFE2L2|PDPK1|MAP2K3|CXCL12|TEK|IRS2|NRP2|ZNF580|SEMA4C|SEMA4A|FAM83H	-1.1	MyList
GO Biological Processes	19	GO:0044770	cell cycle phase transition	19_GO:0009987 cellular process	-2.1	2.8	3.1	30182	169	502	8	1.6	0.56	596|1018|2672|2935|7465|9088|23137|245711	BCL2|CDK3|GFI1|GSPT1|WEE1|PKMYT1|SMC5|SPDYA	-1.1	MyList
GO Biological Processes	19	GO:0090132	epithelium migration	19_GO:0032501 multicellular organismal process	-2.1	3.5	3.3	30182	103	502	6	1.2	0.49	6286|8660|29941|54443|79977|116844	S100P|IRS2|PKN3|ANLN|GRHL2|LRG1	-1.1	MyList
GO Biological Processes	19	GO:0048771	tissue remodeling	19_GO:0032501 multicellular organismal process	-2.1	3.5	3.3	30182	103	502	6	1.2	0.49	54|2034|2296|3976|4323|55366	ACP5|EPAS1|FOXC1|LIF|MMP14|LGR4	-1.1	MyList
Reactome Gene Sets	6	R-HSA-382556	ABC-family proteins mediated transport		-2.1	3.5	3.3	30182	103	502	6	1.2	0.49	368|5710|5711|7311|10257|23456	ABCC6|PSMD4|PSMD5|UBA52|ABCC4|ABCB10	-1.1	MyList
GO Biological Processes	19	GO:0099111	microtubule-based transport	19_GO:0051179 localization	-2.1	2.6	3.1	30182	205	502	9	1.8	0.59	1780|6780|9531|23059|50632|79582|80208|84871|146439	DYNC1I1|STAU1|BAG3|CLUAP1|CALY|SPAG16|SPG11|AGBL4|BICDL2	-1.1	MyList
GO Biological Processes	19	GO:0030705	cytoskeleton-dependent intracellular transport	19_GO:0051179 localization	-2.1	2.6	3.1	30182	205	502	9	1.8	0.59	1780|6780|9531|23059|50632|80208|84871|146439|283234	DYNC1I1|STAU1|BAG3|CLUAP1|CALY|SPG11|AGBL4|BICDL2|CCDC88B	-1.1	MyList
GO Biological Processes	19	GO:0022408	negative regulation of cell-cell adhesion	19_GO:0048519 negative regulation of biological process	-2.1	2.6	3.1	30182	205	502	9	1.8	0.59	1493|2302|3142|3902|5621|6387|6469|7001|26191	CTLA4|FOXJ1|HLX|LAG3|PRNP|CXCL12|SHH|PRDX2|PTPN22	-1.1	MyList
GO Biological Processes	19	GO:0002920	regulation of humoral immune response	19_GO:0002376 immune system process	-2.1	5.1	3.7	30182	47	502	4	0.8	0.4	966|1379|2302|124976	CD59|CR1L|FOXJ1|SPNS2	-1.1	MyList
GO Biological Processes	19	GO:0071715	icosanoid transport	19_GO:0051179 localization	-2.1	5.1	3.7	30182	47	502	4	0.8	0.4	368|1815|10257|147011	ABCC6|DRD4|ABCC4|PROCA1	-1.1	MyList
Reactome Gene Sets	6	R-HSA-6783783	Interleukin-10 signaling		-2.1	5.1	3.7	30182	47	502	4	0.8	0.4	1440|3587|3976|414062	CSF3|IL10RA|LIF|CCL3L3	-1.1	MyList
GO Biological Processes	19	GO:0120163	negative regulation of cold-induced thermogenesis	19_GO:0042592 homeostatic process	-2.1	5.1	3.7	30182	47	502	4	0.8	0.4	1149|6794|23228|55366	CIDEA|STK11|PLCL2|LGR4	-1.1	MyList
GO Biological Processes	19	GO:1900271	regulation of long-term synaptic potentiation	19_GO:0023052 signaling	-2.1	5.1	3.7	30182	47	502	4	0.8	0.4	5621|6780|23237|51201	PRNP|STAU1|ARC|ZDHHC2	-1.1	MyList
KEGG Pathway	24	hsa00620	Pyruvate metabolism		-2.1	5.1	3.7	30182	47	502	4	0.8	0.4	39|224|4199|160287	ACAT2|ALDH3A2|ME1|LDHAL6A	-1.1	MyList
GO Biological Processes	19	GO:0001764	neuron migration	19_GO:0032502 developmental process	-2.1	3.1	3.2	30182	136	502	7	1.4	0.52	2624|6387|7976|8828|9620|26468|27185	GATA2|CXCL12|FZD3|NRP2|CELSR1|LHX6|DISC1	-1.1	MyList
GO Biological Processes	19	GO:0032944	regulation of mononuclear cell proliferation	19_GO:0050789 regulation of biological process	-2.1	2.5	3	30182	243	502	10	2	0.62	596|1493|1725|2302|5621|6469|8660|26191|115650|283234	BCL2|CTLA4|DHPS|FOXJ1|PRNP|SHH|IRS2|PTPN22|TNFRSF13C|CCDC88B	-1.1	MyList
GO Biological Processes	19	GO:2000311	regulation of AMPA receptor activity	19_GO:0051179 localization	-2.1	7.2	4	30182	25	502	3	0.6	0.34	23237|57555|59283	ARC|NLGN2|CACNG8	-1.1	MyList
GO Biological Processes	19	GO:0030851	granulocyte differentiation	19_GO:0032502 developmental process	-2.1	7.2	4	30182	25	502	3	0.6	0.34	1053|1440|2624	CEBPE|CSF3|GATA2	-1.1	MyList
GO Biological Processes	19	GO:0060038	cardiac muscle cell proliferation	19_GO:0040007 growth	-2.1	7.2	4	30182	25	502	3	0.6	0.34	1525|2242|2296	CXADR|FES|FOXC1	-1.1	MyList
GO Biological Processes	19	GO:0060575	intestinal epithelial cell differentiation	19_GO:0032502 developmental process	-2.1	7.2	4	30182	25	502	3	0.6	0.34	3202|5753|7855	HOXA5|PTK6|FZD5	-1.1	MyList
GO Biological Processes	19	GO:1904996	positive regulation of leukocyte adhesion to vascular endothelial cell	19_GO:0048518 positive regulation of biological process	-2.1	7.2	4	30182	25	502	3	0.6	0.34	1991|2526|2529	ELANE|FUT4|FUT7	-1.1	MyList
GO Biological Processes	19	GO:0010226	response to lithium ion	19_GO:0050896 response to stimulus	-2.1	7.2	4	30182	25	502	3	0.6	0.34	3613|4780|6469	IMPA2|NFE2L2|SHH	-1.1	MyList
GO Biological Processes	19	GO:0016055	Wnt signaling pathway	19_GO:0023052 signaling	-2.1	2.3	3	30182	282	502	11	2.2	0.65	6469|7855|7976|8321|8326|9620|10023|11211|27185|55366|147111	SHH|FZD5|FZD3|FZD1|FZD9|CELSR1|FRAT1|FZD10|DISC1|LGR4|NOTUM	-1.1	MyList
GO Biological Processes	19	GO:0034655	nucleobase-containing compound catabolic process	19_GO:0008152 metabolic process	-2.1	2.3	3	30182	282	502	11	2.2	0.65	328|1773|2935|4968|5433|10591|25819|79661|83594|254552|339345	APEX1|DNASE1|GSPT1|OGG1|POLR2D|DNPH1|NOCT|NEIL1|NUDT12|NUDT8|NANOS2	-1.1	MyList
GO Biological Processes	19	GO:0198738	cell-cell signaling by wnt	19_GO:0023052 signaling	-2.1	2.3	3	30182	282	502	11	2.2	0.65	6469|7855|7976|8321|8326|9620|10023|11211|27185|55366|147111	SHH|FZD5|FZD3|FZD1|FZD9|CELSR1|FRAT1|FZD10|DISC1|LGR4|NOTUM	-1.1	MyList
GO Biological Processes	19	GO:0048762	mesenchymal cell differentiation	19_GO:0032502 developmental process	-2.1	2.8	3.1	30182	171	502	8	1.6	0.56	596|2296|4902|6469|8828|30812|54910|64218	BCL2|FOXC1|NRTN|SHH|NRP2|SOX8|SEMA4C|SEMA4A	-1.1	MyList
GO Biological Processes	19	GO:0000904	cell morphogenesis involved in differentiation	19_GO:0032502 developmental process	-2.1	2	2.8	30182	487	502	16	3.2	0.78	596|3199|3925|6387|6469|6794|7976|8828|23237|54538|54910|64218|64855|79977|80208|113246	BCL2|HOXA2|STMN1|CXCL12|SHH|STK11|FZD3|NRP2|ARC|ROBO4|SEMA4C|SEMA4A|NIBAN2|GRHL2|SPG11|C12orf57	-1.1	MyList
GO Biological Processes	19	GO:0072521	purine-containing compound metabolic process	19_GO:0008152 metabolic process	-2.1	2	2.8	30182	487	502	16	3.2	0.78	368|2645|4199|4728|4879|5901|10591|25819|28992|60481|80221|83594|93100|221264|254552|790955	ABCC6|GCK|ME1|NDUFS8|NPPB|RAN|DNPH1|NOCT|MACROD1|ELOVL5|ACSF2|NUDT12|NAPRT|AK9|NUDT8|UQCC3	-1.1	MyList
GO Biological Processes	19	GO:0030003	cellular monoatomic cation homeostasis	19_GO:0042592 homeostatic process	-2.1	2.1	2.9	30182	403	502	14	2.8	0.73	489|596|664|858|1815|1991|3074|3932|5621|6387|8326|9256|27185|57468	ATP2A3|BCL2|BNIP3|CAV2|DRD4|ELANE|HEXB|LCK|PRNP|CXCL12|FZD9|TSPOAP1|DISC1|SLC12A5	-1.1	MyList
GO Biological Processes	19	GO:0046700	heterocycle catabolic process	19_GO:0008152 metabolic process	-2.1	2.2	2.9	30182	322	502	12	2.4	0.68	328|1773|2935|4780|4968|5433|10591|25819|79661|83594|254552|339345	APEX1|DNASE1|GSPT1|NFE2L2|OGG1|POLR2D|DNPH1|NOCT|NEIL1|NUDT12|NUDT8|NANOS2	-1.1	MyList
Canonical Pathways	11	M145	PID P53 DOWNSTREAM PATHWAY		-2.1	3.1	3.2	30182	137	502	7	1.4	0.52	596|3976|10498|64065|64326|133746|255488	BCL2|LIF|CARM1|PERP|COP1|JMY|RNF144B	-1.1	MyList
KEGG Pathway	24	hsa04910	Insulin signaling pathway		-2.1	3.1	3.2	30182	137	502	7	1.4	0.52	810|2645|3845|5170|8660|51806|399694	CALML3|GCK|KRAS|PDPK1|IRS2|CALML5|SHC4	-1.1	MyList
Reactome Gene Sets	6	R-HSA-202733	Cell surface interactions at the vascular wall		-2.1	3.1	3.2	30182	137	502	7	1.4	0.52	682|1525|3683|3845|3932|5624|7010	BSG|CXADR|ITGAL|KRAS|LCK|PROC|TEK	-1.1	MyList
GO Biological Processes	19	GO:1903052	positive regulation of proteolysis involved in protein catabolic process	19_GO:0048518 positive regulation of biological process	-2.1	3.1	3.2	30182	137	502	7	1.4	0.52	4780|5886|27185|64326|79016|84871|255488	NFE2L2|RAD23A|DISC1|COP1|DDA1|AGBL4|RNF144B	-1.1	MyList
GO Biological Processes	19	GO:0031638	zymogen activation	19_GO:0008152 metabolic process	-2.1	5	3.6	30182	48	502	4	0.8	0.4	2678|4323|27141|64065	GGT1|MMP14|CIDEB|PERP	-1.1	MyList
GO Biological Processes	19	GO:0043300	regulation of leukocyte degranulation	19_GO:0002376 immune system process	-2.1	5	3.6	30182	48	502	4	0.8	0.4	2242|2268|2624|5170	FES|FGR|GATA2|PDPK1	-1.1	MyList
KEGG Pathway	24	hsa00280	Valine, leucine and isoleucine degradation		-2.1	5	3.6	30182	48	502	4	0.8	0.4	39|224|587|11112	ACAT2|ALDH3A2|BCAT2|HIBADH	-1.1	MyList
GO Biological Processes	19	GO:0019221	cytokine-mediated signaling pathway	19_GO:0023052 signaling	-2.1	2.2	2.9	30182	363	502	13	2.6	0.71	1440|2296|3656|3987|4486|5008|6387|7186|7357|9180|10410|115650|414062	CSF3|FOXC1|IRAK2|LIMS1|MST1R|OSM|CXCL12|TRAF2|UGCG|OSMR|IFITM3|TNFRSF13C|CCL3L3	-1.1	MyList
GO Biological Processes	19	GO:0010822	positive regulation of mitochondrion organization	19_GO:0048518 positive regulation of biological process	-2.1	4	3.4	30182	75	502	5	1	0.44	664|10645|27141|55626|201164	BNIP3|CAMKK2|CIDEB|AMBRA1|PLD6	-1.1	MyList
GO Biological Processes	19	GO:0048232	male gamete generation	19_GO:0022414 reproductive process	-2.1	1.8	2.8	30182	619	502	19	3.8	0.85	2302|2678|5901|6794|9509|10732|30812|54456|55366|79582|79893|84223|124626|147912|161514|161931|201164|245711|339345	FOXJ1|GGT1|RAN|STK11|ADAMTS2|TCFL5|SOX8|MOV10L1|LGR4|SPAG16|GGNBP2|IQCG|ZPBP2|SIX5|TBC1D21|ADAD2|PLD6|SPDYA|NANOS2	-1.1	MyList
GO Biological Processes	19	GO:0000302	response to reactive oxygen species	19_GO:0050896 response to stimulus	-2.1	2.8	3.1	30182	172	502	8	1.6	0.56	328|596|664|4780|7001|10645|51157|133522	APEX1|BCL2|BNIP3|NFE2L2|PRDX2|CAMKK2|ZNF580|PPARGC1B	-1.1	MyList
GO Biological Processes	19	GO:0010817	regulation of hormone levels	19_GO:0065007 biological regulation	-2.1	1.9	2.8	30182	532	502	17	3.4	0.81	587|1522|1717|2645|2672|2834|3976|4826|5008|5447|6469|8447|8660|30812|54905|57555|64855	BCAT2|CTSZ|DHCR7|GCK|GFI1|PRLHR|LIF|NNAT|OSM|POR|SHH|DOC2B|IRS2|SOX8|CYP2W1|NLGN2|NIBAN2	-1.1	MyList
KEGG Pathway	24	hsa05014	Amyotrophic lateral sclerosis		-2.1	2.1	2.9	30182	364	502	13	2.6	0.71	596|1339|4728|5606|5630|5710|6300|7186|7384|55567|55626|80208|84617	BCL2|COX6A2|NDUFS8|MAP2K3|PRPH|PSMD4|MAPK12|TRAF2|UQCRC1|DNAH3|AMBRA1|SPG11|TUBB6	-1.1	MyList
KEGG Pathway	24	hsa04915	Estrogen signaling pathway		-2.1	3	3.1	30182	138	502	7	1.4	0.52	596|810|3845|3872|3883|51806|399694	BCL2|CALML3|KRAS|KRT17|KRT33A|CALML5|SHC4	-1.1	MyList
Reactome Gene Sets	6	R-HSA-211000	Gene Silencing by RNA		-2.1	3	3.1	30182	138	502	7	1.4	0.52	3018|5433|5901|8353|54456|113802|201164	H2BC3|POLR2D|RAN|H3C6|MOV10L1|HENMT1|PLD6	-1.1	MyList
GO Biological Processes	19	GO:0044270	cellular nitrogen compound catabolic process	19_GO:0008152 metabolic process	-2.1	2.2	2.9	30182	324	502	12	2.4	0.68	328|1773|2935|4968|5433|5447|10591|25819|79661|83594|254552|339345	APEX1|DNASE1|GSPT1|OGG1|POLR2D|POR|DNPH1|NOCT|NEIL1|NUDT12|NUDT8|NANOS2	-1.1	MyList
GO Biological Processes	19	GO:0040008	regulation of growth	19_GO:0040007 growth	-2.1	1.8	2.7	30182	621	502	19	3.8	0.85	596|672|780|1525|2296|3142|3872|4323|4879|5753|6387|6414|6794|10591|27185|54910|56994|64218|728642	BCL2|BRCA1|DDR1|CXADR|FOXC1|HLX|KRT17|MMP14|NPPB|PTK6|CXCL12|SELENOP|STK11|DNPH1|DISC1|SEMA4C|CHPT1|SEMA4A|CDK11A	-1.1	MyList
GO Biological Processes	19	GO:0043086	negative regulation of catalytic activity	19_GO:0065007 biological regulation	-2.1	1.8	2.7	30182	666	502	20	4	0.87	1992|2644|2672|5170|5176|5271|5339|5447|5621|5753|7532|8660|9546|10049|11211|26191|53836|79661|79893|80119	SERPINB1|GCHFR|GFI1|PDPK1|SERPINF1|SERPINB8|PLEC|POR|PRNP|PTK6|YWHAG|IRS2|APBA3|DNAJB6|FZD10|PTPN22|GPR87|NEIL1|GGNBP2|PIF1	-1.1	MyList
GO Biological Processes	19	GO:0035265	organ growth	19_GO:0040007 growth	-2.1	3.4	3.2	30182	106	502	6	1.2	0.49	596|1525|2242|2296|3142|6469	BCL2|CXADR|FES|FOXC1|HLX|SHH	-1.1	MyList
GO Biological Processes	19	GO:1901568	fatty acid derivative metabolic process	19_GO:0008152 metabolic process	-2.1	4	3.4	30182	76	502	5	1	0.44	224|2678|60481|66002|254552	ALDH3A2|GGT1|ELOVL5|CYP4F12|NUDT8	-1.1	MyList
GO Biological Processes	19	GO:0009166	nucleotide catabolic process	19_GO:0008152 metabolic process	-2.1	4	3.4	30182	76	502	5	1	0.44	4968|10591|79661|83594|254552	OGG1|DNPH1|NEIL1|NUDT12|NUDT8	-1.1	MyList
GO Biological Processes	19	GO:0010721	negative regulation of cell development	19_GO:0032502 developmental process	-2.1	2.3	2.9	30182	286	502	11	2.2	0.65	1493|2302|2624|3142|3902|6469|6993|7001|29956|54910|64218	CTLA4|FOXJ1|GATA2|HLX|LAG3|SHH|DYNLT1|PRDX2|CERS2|SEMA4C|SEMA4A	-1.1	MyList
GO Biological Processes	19	GO:0043114	regulation of vascular permeability	19_GO:0032501 multicellular organismal process	-2.1	4.9	3.6	30182	49	502	4	0.8	0.4	566|4879|5339|7010	AZU1|NPPB|PLEC|TEK	-1.1	MyList
GO Biological Processes	19	GO:0010665	regulation of cardiac muscle cell apoptotic process	19_GO:0050789 regulation of biological process	-2.1	4.9	3.6	30182	49	502	4	0.8	0.4	664|4780|5170|55626	BNIP3|NFE2L2|PDPK1|AMBRA1	-1.1	MyList
GO Biological Processes	19	GO:0070588	calcium ion transmembrane transport	19_GO:0051179 localization	-2.1	2.6	3	30182	210	502	9	1.8	0.59	302|489|596|3932|10343|59283|84502|140738|140803	ANXA2|ATP2A3|BCL2|LCK|PKDREJ|CACNG8|JPH4|TMEM37|TRPM6	-1.1	MyList
KEGG Pathway	24	hsa04015	Rap1 signaling pathway		-2.1	2.6	3	30182	210	502	9	1.8	0.59	810|3683|3845|5606|5909|6300|7010|9855|51806	CALML3|ITGAL|KRAS|MAP2K3|RAP1GAP|MAPK12|TEK|FARP2|CALML5	-1.1	MyList
GO Biological Processes	19	GO:0010954	positive regulation of protein processing	19_GO:0048518 positive regulation of biological process	-2	6.9	3.9	30182	26	502	3	0.6	0.34	302|4241|4323	ANXA2|MELTF|MMP14	-1.1	MyList
GO Biological Processes	19	GO:0006281	DNA repair	19_GO:0050896 response to stimulus	-2	2	2.8	30182	493	502	16	3.2	0.78	328|672|2178|4350|4968|5536|5886|7517|9401|23137|79661|80119|84296|84464|133746|199990	APEX1|BRCA1|FANCE|MPG|OGG1|PPP5C|RAD23A|XRCC3|RECQL4|SMC5|NEIL1|PIF1|GINS4|SLX4|JMY|FAAP20	-1.1	MyList
Reactome Gene Sets	6	R-HSA-9755511	KEAP1-NFE2L2 pathway		-2	3.4	3.2	30182	107	502	6	1.2	0.49	672|4199|4780|5710|5711|7311	BRCA1|ME1|NFE2L2|PSMD4|PSMD5|UBA52	-1.1	MyList
KEGG Pathway	24	hsa05100	Bacterial invasion of epithelial cells		-2	3.9	3.3	30182	77	502	5	1	0.44	858|1731|55752|79767|399694	CAV2|SEPTIN1|SEPTIN11|ELMO3|SHC4	-1.1	MyList
GO Biological Processes	19	GO:0007264	small GTPase mediated signal transduction	19_GO:0023052 signaling	-2	2.4	2.9	30182	249	502	10	2	0.62	389|3845|5337|5867|9289|9620|9649|9855|10672|54509	RHOC|KRAS|PLD1|RAB4A|ADGRG1|CELSR1|RALGPS1|FARP2|GNA13|RHOF	-1.1	MyList
KEGG Pathway	24	hsa05132	Salmonella infection		-2	2.4	2.9	30182	249	502	10	2	0.62	302|596|1780|5606|5869|6300|6993|7186|79792|84617	ANXA2|BCL2|DYNC1I1|MAP2K3|RAB5B|MAPK12|DYNLT1|TRAF2|GSDMD|TUBB6	-1.1	MyList
GO Biological Processes	19	GO:0042063	gliogenesis	19_GO:0032502 developmental process	-2	2.4	2.9	30182	249	502	10	2	0.62	566|664|3074|3845|4323|5339|6469|9289|27185|30812	AZU1|BNIP3|HEXB|KRAS|MMP14|PLEC|SHH|ADGRG1|DISC1|SOX8	-1.1	MyList
GO Biological Processes	19	GO:0045619	regulation of lymphocyte differentiation	19_GO:0002376 immune system process	-2	2.6	2.9	30182	212	502	9	1.8	0.59	1493|2302|3142|3662|3902|4323|6469|7001|55626	CTLA4|FOXJ1|HLX|IRF4|LAG3|MMP14|SHH|PRDX2|AMBRA1	-1.1	MyList
GO Biological Processes	19	GO:0061013	regulation of mRNA catabolic process	19_GO:0048519 negative regulation of biological process	-2	2.6	2.9	30182	212	502	9	1.8	0.59	328|1153|5433|7186|11187|25819|55603|115572|339345	APEX1|CIRBP|POLR2D|TRAF2|PKP3|NOCT|TENT5A|TENT5B|NANOS2	-1.1	MyList
KEGG Pathway	24	hsa05170	Human immunodeficiency virus 1 infection		-2	2.6	2.9	30182	212	502	9	1.8	0.59	596|810|3845|4772|5606|6300|7186|7465|51806	BCL2|CALML3|KRAS|NFATC1|MAP2K3|MAPK12|TRAF2|WEE1|CALML5	-1.1	MyList
GO Biological Processes	19	GO:0061640	cytoskeleton-dependent cytokinesis	19_GO:0009987 cellular process	-2	3.3	3.2	30182	108	502	6	1.2	0.49	389|1731|3925|5339|54443|55752	RHOC|SEPTIN1|STMN1|PLEC|ANLN|SEPTIN11	-1.1	MyList
GO Biological Processes	19	GO:0032434	regulation of proteasomal ubiquitin-dependent protein catabolic process	19_GO:0008152 metabolic process	-2	3	3.1	30182	141	502	7	1.4	0.52	4780|5886|6469|6815|64326|79016|255488	NFE2L2|RAD23A|SHH|STYX|COP1|DDA1|RNF144B	-1.1	MyList
GO Biological Processes	19	GO:0021872	forebrain generation of neurons	19_GO:0032502 developmental process	-2	4.8	3.5	30182	50	502	4	0.8	0.4	2624|8828|26468|27185	GATA2|NRP2|LHX6|DISC1	-1.1	MyList
GO Biological Processes	19	GO:0019748	secondary metabolic process	19_GO:0008152 metabolic process	-2	4.8	3.5	30182	50	502	4	0.8	0.4	596|4780|54905|126321	BCL2|NFE2L2|CYP2W1|MFSD12	-1.1	MyList
GO Biological Processes	19	GO:1903747	regulation of establishment of protein localization to mitochondrion	19_GO:0051179 localization	-2	4.8	3.5	30182	50	502	4	0.8	0.4	7855|9531|55486|118424	FZD5|BAG3|PARL|UBE2J2	-1.1	MyList
GO Biological Processes	19	GO:2000378	negative regulation of reactive oxygen species metabolic process	19_GO:0048519 negative regulation of biological process	-2	4.8	3.5	30182	50	502	4	0.8	0.4	54|596|664|672	ACP5|BCL2|BNIP3|BRCA1	-1.1	MyList
GO Biological Processes	19	GO:0010634	positive regulation of epithelial cell migration	19_GO:0040011 locomotion	-2	2.7	3	30182	176	502	8	1.6	0.56	2624|4780|5170|5606|7010|8660|8828|51157	GATA2|NFE2L2|PDPK1|MAP2K3|TEK|IRS2|NRP2|ZNF580	-1.1	MyList
GO Biological Processes	19	GO:0051099	positive regulation of binding	19_GO:0065007 biological regulation	-2	2.7	3	30182	176	502	8	1.6	0.56	302|1440|2296|3662|3925|5901|23228|64855	ANXA2|CSF3|FOXC1|IRF4|STMN1|RAN|PLCL2|NIBAN2	-1.1	MyList
GO Biological Processes	19	GO:0009896	positive regulation of catabolic process	19_GO:0048518 positive regulation of biological process	-2	1.9	2.7	30182	540	502	17	3.4	0.81	664|4780|5433|5886|6794|8660|9531|10645|25819|27185|55626|56963|64326|79016|84871|255488|339345	BNIP3|NFE2L2|POLR2D|RAD23A|STK11|IRS2|BAG3|CAMKK2|NOCT|DISC1|AMBRA1|RGMA|COP1|DDA1|AGBL4|RNF144B|NANOS2	-1.1	MyList
Reactome Gene Sets	6	R-HSA-5357801	Programmed Cell Death		-2	2.5	2.9	30182	213	502	9	1.8	0.59	596|1991|5339|5710|5711|7186|7311|7532|79792	BCL2|ELANE|PLEC|PSMD4|PSMD5|TRAF2|UBA52|YWHAG|GSDMD	-1.1	MyList
GO Biological Processes	19	GO:0071695	anatomical structure maturation	19_GO:0032502 developmental process	-2	2.5	2.9	30182	213	502	9	1.8	0.59	596|2034|2624|3202|7855|9855|26468|30812|201164	BCL2|EPAS1|GATA2|HOXA5|FZD5|FARP2|LHX6|SOX8|PLD6	-1.1	MyList
GO Biological Processes	19	GO:0006873	cellular monoatomic ion homeostasis	19_GO:0042592 homeostatic process	-2	2	2.8	30182	412	502	14	2.8	0.73	489|596|664|858|1815|1991|3074|3932|5621|6387|8326|9256|27185|57468	ATP2A3|BCL2|BNIP3|CAV2|DRD4|ELANE|HEXB|LCK|PRNP|CXCL12|FZD9|TSPOAP1|DISC1|SLC12A5	-1.1	MyList
GO Biological Processes	19	GO:0072524	pyridine-containing compound metabolic process	19_GO:0008152 metabolic process	-2	3.9	3.3	30182	78	502	5	1	0.44	2645|4199|25819|83594|93100	GCK|ME1|NOCT|NUDT12|NAPRT	-1.1	MyList
GO Biological Processes	19	GO:1903533	regulation of protein targeting	19_GO:0051179 localization	-2	3.9	3.3	30182	78	502	5	1	0.44	5621|7855|9531|55486|118424	PRNP|FZD5|BAG3|PARL|UBE2J2	-1.1	MyList
GO Biological Processes	19	GO:0001818	negative regulation of cytokine production	19_GO:0048519 negative regulation of biological process	-2	2.1	2.8	30182	371	502	13	2.6	0.71	54|1149|1991|1992|2302|2841|3902|5621|9454|10225|26191|54476|55366	ACP5|CIDEA|ELANE|SERPINB1|FOXJ1|GPR18|LAG3|PRNP|HOMER3|CD96|PTPN22|RNF216|LGR4	-1.1	MyList
GO Biological Processes	19	GO:0090130	tissue migration	19_GO:0032501 multicellular organismal process	-2	3.3	3.1	30182	109	502	6	1.2	0.49	6286|8660|29941|54443|79977|116844	S100P|IRS2|PKN3|ANLN|GRHL2|LRG1	-1.1	MyList
GO Biological Processes	19	GO:0048641	regulation of skeletal muscle tissue development	19_GO:0032502 developmental process	-2	6.7	3.8	30182	27	502	3	0.6	0.34	596|6469|64855	BCL2|SHH|NIBAN2	-1.1	MyList
Canonical Pathways	11	M1718	SIG IL4RECEPTOR IN B LYPHOCYTES		-2	6.7	3.8	30182	27	502	3	0.6	0.34	596|5170|8660	BCL2|PDPK1|IRS2	-1.1	MyList
Canonical Pathways	11	M33	PID GLYPICAN 1PATHWAY		-2	6.7	3.8	30182	27	502	3	0.6	0.34	2268|3932|5621	FGR|LCK|PRNP	-1.1	MyList
GO Biological Processes	19	GO:0060669	embryonic placenta morphogenesis	19_GO:0032502 developmental process	-2	6.7	3.8	30182	27	502	3	0.6	0.34	7855|10049|79977	FZD5|DNAJB6|GRHL2	-1.1	MyList
GO Biological Processes	19	GO:0050778	positive regulation of immune response	19_GO:0002376 immune system process	-13	5.5	11	30182	613	269	30	11	1.9	716|868|911|925|1675|2268|2533|2867|3055|3107|3134|3502|4210|4938|4940|5027|5795|6556|7525|9473|10125|28639|30009|50852|64127|78989|83666|84166|115362|146722	C1S|CBLB|CD1C|CD8A|CFD|FGR|FYB1|FFAR2|HCK|HLA-C|HLA-F|IGHG3|MEFV|OAS1|OAS3|P2RX7|PTPRJ|SLC11A1|YES1|THEMIS2|RASGRP1|TRBC1|TBX21|TRAT1|NOD2|COLEC11|PARP9|NLRC5|GBP5|CD300LF	-10	RNA_Keller_B-cells-CD21pos_infection_Up
GO Biological Processes	19	GO:0002683	negative regulation of immune system process	19_GO:0002376 immune system process	-12	6	11	30182	487	269	26	9.7	1.8	54|347|868|2268|2633|3055|3134|3162|3958|4938|4940|5795|7525|7940|9231|10225|10288|10875|11240|23208|23495|23547|30009|64127|84166|146722	ACP5|APOD|CBLB|FGR|GBP1|HCK|HLA-F|HMOX1|LGALS3|OAS1|OAS3|PTPRJ|YES1|LST1|DLG5|CD96|LILRB2|FGL2|PADI2|SYT11|TNFRSF13B|LILRA4|TBX21|NOD2|NLRC5|CD300LF	-9.4	RNA_Keller_B-cells-CD21pos_infection_Up
GO Biological Processes	19	GO:0031347	regulation of defense response	19_GO:0050896 response to stimulus	-12	4.7	9.8	30182	767	269	32	12	2	54|1636|2268|2529|2867|3055|3134|4210|4938|4940|5176|5743|6772|7133|7525|8482|9021|10125|10225|10875|23208|23547|64127|78989|83666|84166|115362|146722|146850|283131|284207|440823	ACP5|ACE|FGR|FUT7|FFAR2|HCK|HLA-F|MEFV|OAS1|OAS3|SERPINF1|PTGS2|STAT1|TNFRSF1B|YES1|SEMA7A|SOCS3|RASGRP1|CD96|FGL2|SYT11|LILRA4|NOD2|COLEC11|PARP9|NLRC5|GBP5|CD300LF|PIK3R6|NEAT1|METRNL|MIAT	-9.3	RNA_Keller_B-cells-CD21pos_infection_Up
GO Biological Processes	19	GO:0002694	regulation of leukocyte activation	19_GO:0002376 immune system process	-12	5.3	10	30182	598	269	28	10	1.9	199|868|1026|2242|2268|2621|3134|3162|3280|3601|3958|6659|7133|7480|7525|7940|9231|9473|10125|10148|10288|10875|23208|23495|30009|64127|146722|146850	AIF1|CBLB|CDKN1A|FES|FGR|GAS6|HLA-F|HMOX1|HES1|IL15RA|LGALS3|SOX4|TNFRSF1B|WNT10B|YES1|LST1|DLG5|THEMIS2|RASGRP1|EBI3|LILRB2|FGL2|SYT11|TNFRSF13B|TBX21|NOD2|CD300LF|PIK3R6	-9.1	RNA_Keller_B-cells-CD21pos_infection_Up
GO Biological Processes	19	GO:0032102	negative regulation of response to external stimulus	19_GO:0048519 negative regulation of biological process	-12	6.1	10	30182	443	269	24	8.9	1.7	54|199|2247|2268|3055|3134|4210|4938|4940|5176|5345|7133|7525|8482|9021|10225|10875|11240|23208|23547|64127|65078|84166|284207	ACP5|AIF1|FGF2|FGR|HCK|HLA-F|MEFV|OAS1|OAS3|SERPINF1|SERPINF2|TNFRSF1B|YES1|SEMA7A|SOCS3|CD96|FGL2|PADI2|SYT11|LILRA4|NOD2|RTN4R|NLRC5|METRNL	-8.8	RNA_Keller_B-cells-CD21pos_infection_Up
GO Biological Processes	19	GO:0002697	regulation of immune effector process	19_GO:0002376 immune system process	-11	6.4	10	30182	384	269	22	8.2	1.7	54|911|2242|2268|2529|2867|3107|3134|3162|3958|5027|5795|7133|8482|10125|10225|10417|10875|30009|64127|78989|146850	ACP5|CD1C|FES|FGR|FUT7|FFAR2|HLA-C|HLA-F|HMOX1|LGALS3|P2RX7|PTPRJ|TNFRSF1B|SEMA7A|RASGRP1|CD96|SPON2|FGL2|TBX21|NOD2|COLEC11|PIK3R6	-8.3	RNA_Keller_B-cells-CD21pos_infection_Up
GO Biological Processes	19	GO:0050865	regulation of cell activation	19_GO:0032501 multicellular organismal process	-11	4.8	9.3	30182	655	269	28	10	1.9	199|868|1026|2242|2268|2621|3134|3162|3280|3601|3958|6659|7133|7480|7525|7940|9231|9473|10125|10148|10288|10875|23208|23495|30009|64127|146722|146850	AIF1|CBLB|CDKN1A|FES|FGR|GAS6|HLA-F|HMOX1|HES1|IL15RA|LGALS3|SOX4|TNFRSF1B|WNT10B|YES1|LST1|DLG5|THEMIS2|RASGRP1|EBI3|LILRB2|FGL2|SYT11|TNFRSF13B|TBX21|NOD2|CD300LF|PIK3R6	-8.2	RNA_Keller_B-cells-CD21pos_infection_Up
Reactome Gene Sets	6	R-HSA-6798695	Neutrophil degranulation		-11	5.6	9.6	30182	482	269	24	8.9	1.7	1508|1675|2212|2268|2519|3101|3107|3687|3958|5265|5795|5836|6282|6556|7133|9961|10288|10312|10875|11240|23406|79930|94103|116844	CTSB|CFD|FCGR2A|FGR|FUCA2|HK3|HLA-C|ITGAX|LGALS3|SERPINA1|PTPRJ|PYGL|S100A11|SLC11A1|TNFRSF1B|MVP|LILRB2|TCIRG1|FGL2|PADI2|COTL1|DOK3|ORMDL3|LRG1	-8	RNA_Keller_B-cells-CD21pos_infection_Up
Reactome Gene Sets	6	R-HSA-1280215	Cytokine Signaling in Immune system		-11	4.5	9	30182	730	269	29	11	1.9	1026|1848|2247|2633|2634|3055|3107|3134|3162|3587|3601|3687|4055|4938|4940|5698|5743|5795|6772|7133|7525|9021|9246|10148|23495|64127|84166|115361|115362	CDKN1A|DUSP6|FGF2|GBP1|GBP2|HCK|HLA-C|HLA-F|HMOX1|IL10RA|IL15RA|ITGAX|LTBR|OAS1|OAS3|PSMB9|PTGS2|PTPRJ|STAT1|TNFRSF1B|YES1|SOCS3|UBE2L6|EBI3|TNFRSF13B|NOD2|NLRC5|GBP4|GBP5	-7.8	RNA_Keller_B-cells-CD21pos_infection_Up
GO Biological Processes	19	GO:0051249	regulation of lymphocyte activation	19_GO:0002376 immune system process	-10	5.4	9.3	30182	503	269	24	8.9	1.7	199|868|1026|2268|2621|3134|3280|3601|3958|6659|7133|7480|7525|7940|9231|9473|10125|10148|10288|10875|23495|30009|64127|146850	AIF1|CBLB|CDKN1A|FGR|GAS6|HLA-F|HES1|IL15RA|LGALS3|SOX4|TNFRSF1B|WNT10B|YES1|LST1|DLG5|THEMIS2|RASGRP1|EBI3|LILRB2|FGL2|TNFRSF13B|TBX21|NOD2|PIK3R6	-7.7	RNA_Keller_B-cells-CD21pos_infection_Up
GO Biological Processes	19	GO:0031348	negative regulation of defense response	19_GO:0048519 negative regulation of biological process	-10	7.1	9.8	30182	284	269	18	6.7	1.5	54|2268|3055|3134|4210|4938|4940|5176|7133|7525|9021|10225|10875|23208|23547|64127|84166|284207	ACP5|FGR|HCK|HLA-F|MEFV|OAS1|OAS3|SERPINF1|TNFRSF1B|YES1|SOCS3|CD96|FGL2|SYT11|LILRA4|NOD2|NLRC5|METRNL	-7.2	RNA_Keller_B-cells-CD21pos_infection_Up
GO Biological Processes	19	GO:0001819	positive regulation of cytokine production	19_GO:0048518 positive regulation of biological process	-9.9	5.3	9	30182	489	269	23	8.6	1.7	199|2268|2867|3134|3162|4210|4938|4940|5027|5345|5743|5795|6556|6772|8482|10125|10148|10288|10417|30009|64127|115362|192683	AIF1|FGR|FFAR2|HLA-F|HMOX1|MEFV|OAS1|OAS3|P2RX7|SERPINF2|PTGS2|PTPRJ|SLC11A1|STAT1|SEMA7A|RASGRP1|EBI3|LILRB2|SPON2|TBX21|NOD2|GBP5|SCAMP5	-7.2	RNA_Keller_B-cells-CD21pos_infection_Up
GO Biological Processes	19	GO:0002764	immune response-regulating signaling pathway	19_GO:0002376 immune system process	-9.9	6.6	9.6	30182	322	269	19	7.1	1.6	868|925|2268|2533|2867|3055|3502|4210|4938|4940|5795|7525|9473|10288|23547|28639|64127|78989|146722	CBLB|CD8A|FGR|FYB1|FFAR2|HCK|IGHG3|MEFV|OAS1|OAS3|PTPRJ|YES1|THEMIS2|LILRB2|LILRA4|TRBC1|NOD2|COLEC11|CD300LF	-7.2	RNA_Keller_B-cells-CD21pos_infection_Up
Reactome Gene Sets	6	R-HSA-198933	Immunoregulatory interactions between a Lymphoid and a non-Lymphoid cell		-9.6	11	11	30182	134	269	13	4.8	1.3	911|925|946|3107|3134|10225|10288|11024|23547|54210|57823|120425|146722	CD1C|CD8A|SIGLEC6|HLA-C|HLA-F|CD96|LILRB2|LILRA1|LILRA4|TREM1|SLAMF7|JAML|CD300LF	-6.9	RNA_Keller_B-cells-CD21pos_infection_Up
GO Biological Processes	19	GO:0002252	immune effector process	19_GO:0002376 immune system process	-9.4	5.8	9	30182	389	269	20	7.4	1.6	716|911|925|1636|1675|2268|2529|3055|5027|6556|7525|8291|10125|10312|10417|10875|30009|54210|57823|78989	C1S|CD1C|CD8A|ACE|CFD|FGR|FUT7|HCK|P2RX7|SLC11A1|YES1|DYSF|RASGRP1|TCIRG1|SPON2|FGL2|TBX21|TREM1|SLAMF7|COLEC11	-6.7	RNA_Keller_B-cells-CD21pos_infection_Up
GO Biological Processes	19	GO:0002253	activation of immune response	19_GO:0002376 immune system process	-9.1	5.9	8.9	30182	360	269	19	7.1	1.6	716|868|925|1675|2268|2533|2867|3055|3502|4210|4938|4940|5795|7525|9473|28639|64127|78989|146722	C1S|CBLB|CD8A|CFD|FGR|FYB1|FFAR2|HCK|IGHG3|MEFV|OAS1|OAS3|PTPRJ|YES1|THEMIS2|TRBC1|NOD2|COLEC11|CD300LF	-6.5	RNA_Keller_B-cells-CD21pos_infection_Up
GO Biological Processes	19	GO:0045087	innate immune response	19_GO:0044419 biological process involved in interspecies interaction between organisms	-9.1	4.1	8	30182	745	269	27	10	1.8	199|716|1675|2268|2633|2634|3055|3107|3958|4210|4938|4940|6556|6772|7525|8751|10417|23547|23569|54210|57823|64127|78989|83666|84166|115361|115362	AIF1|C1S|CFD|FGR|GBP1|GBP2|HCK|HLA-C|LGALS3|MEFV|OAS1|OAS3|SLC11A1|STAT1|YES1|ADAM15|SPON2|LILRA4|PADI4|TREM1|SLAMF7|NOD2|COLEC11|PARP9|NLRC5|GBP4|GBP5	-6.4	RNA_Keller_B-cells-CD21pos_infection_Up
GO Biological Processes	19	GO:0002831	regulation of response to biotic stimulus	19_GO:0050896 response to stimulus	-8.8	5.1	8.4	30182	463	269	21	7.8	1.6	2268|2867|3055|3134|4210|4938|4940|6772|10125|10225|10875|23208|23547|64127|78989|83666|84166|115362|146722|146850|440823	FGR|FFAR2|HCK|HLA-F|MEFV|OAS1|OAS3|STAT1|RASGRP1|CD96|FGL2|SYT11|LILRA4|NOD2|COLEC11|PARP9|NLRC5|GBP5|CD300LF|PIK3R6|MIAT	-6.2	RNA_Keller_B-cells-CD21pos_infection_Up
GO Biological Processes	19	GO:0002757	immune response-activating signaling pathway	19_GO:0002376 immune system process	-8.8	6.5	9	30182	293	269	17	6.3	1.5	868|925|2268|2533|2867|3055|3502|4210|4938|4940|5795|7525|9473|28639|64127|78989|146722	CBLB|CD8A|FGR|FYB1|FFAR2|HCK|IGHG3|MEFV|OAS1|OAS3|PTPRJ|YES1|THEMIS2|TRBC1|NOD2|COLEC11|CD300LF	-6.2	RNA_Keller_B-cells-CD21pos_infection_Up
GO Biological Processes	19	GO:0002768	immune response-regulating cell surface receptor signaling pathway	19_GO:0002376 immune system process	-8.8	7	9.1	30182	258	269	16	5.9	1.4	868|925|2268|2533|2867|3055|3502|4938|5795|7525|9473|10288|23547|28639|64127|78989	CBLB|CD8A|FGR|FYB1|FFAR2|HCK|IGHG3|OAS1|PTPRJ|YES1|THEMIS2|LILRB2|LILRA4|TRBC1|NOD2|COLEC11	-6.2	RNA_Keller_B-cells-CD21pos_infection_Up
GO Biological Processes	19	GO:0050764	regulation of phagocytosis	19_GO:0051179 localization	-8.7	12	11	30182	101	269	11	4.1	1.2	2268|2621|3055|3601|5795|6556|8291|23208|64127|78989|146722	FGR|GAS6|HCK|IL15RA|PTPRJ|SLC11A1|DYSF|SYT11|NOD2|COLEC11|CD300LF	-6.1	RNA_Keller_B-cells-CD21pos_infection_Up
GO Biological Processes	19	GO:0071345	cellular response to cytokine stimulus	19_GO:0050896 response to stimulus	-8.7	4.1	7.9	30182	719	269	26	9.7	1.8	199|355|2621|2633|2634|2833|3055|3280|3601|4938|5795|6772|7133|9021|10148|10288|10312|10519|11024|11156|11240|23547|115361|115362|146722|285180	AIF1|FAS|GAS6|GBP1|GBP2|CXCR3|HCK|HES1|IL15RA|OAS1|PTPRJ|STAT1|TNFRSF1B|SOCS3|EBI3|LILRB2|TCIRG1|CIB1|LILRA1|PTP4A3|PADI2|LILRA4|GBP4|GBP5|CD300LF|RUFY4	-6.1	RNA_Keller_B-cells-CD21pos_infection_Up
GO Biological Processes	19	GO:0042110	T cell activation	19_GO:0002376 immune system process	-8.6	6.3	8.8	30182	304	269	17	6.3	1.5	868|911|925|2529|3280|5027|6556|6659|7480|10125|10148|10312|10875|28639|30009|57823|120425	CBLB|CD1C|CD8A|FUT7|HES1|P2RX7|SLC11A1|SOX4|WNT10B|RASGRP1|EBI3|TCIRG1|FGL2|TRBC1|TBX21|SLAMF7|JAML	-6	RNA_Keller_B-cells-CD21pos_infection_Up
GO Biological Processes	19	GO:0032103	positive regulation of response to external stimulus	19_GO:0048518 positive regulation of biological process	-8.5	4.6	8	30182	532	269	22	8.2	1.7	199|1636|2247|2621|2867|3055|3134|4210|4938|4940|5345|5743|10125|23604|64127|78989|83666|84166|115362|146722|283131|440823	AIF1|ACE|FGF2|GAS6|FFAR2|HCK|HLA-F|MEFV|OAS1|OAS3|SERPINF2|PTGS2|RASGRP1|DAPK2|NOD2|COLEC11|PARP9|NLRC5|GBP5|CD300LF|NEAT1|MIAT	-5.9	RNA_Keller_B-cells-CD21pos_infection_Up
GO Biological Processes	19	GO:0009617	response to bacterium	19_GO:0044419 biological process involved in interspecies interaction between organisms	-8.4	4	7.7	30182	696	269	25	9.3	1.8	54|1636|1675|2268|2519|2634|3055|3587|4938|4940|5027|5743|5836|6556|7133|10225|10288|10417|54210|55876|64127|84166|115361|115362|116844	ACP5|ACE|CFD|FGR|FUCA2|GBP2|HCK|IL10RA|OAS1|OAS3|P2RX7|PTGS2|PYGL|SLC11A1|TNFRSF1B|CD96|LILRB2|SPON2|TREM1|GSDMB|NOD2|NLRC5|GBP4|GBP5|LRG1	-5.8	RNA_Keller_B-cells-CD21pos_infection_Up
GO Biological Processes	19	GO:0001568	blood vessel development	19_GO:0032502 developmental process	-8.2	4.7	7.9	30182	506	269	21	7.8	1.6	347|1636|1890|2049|2247|2833|3162|3280|3340|4041|5345|5743|6659|7127|7453|8613|8751|9021|9289|10519|146850	APOD|ACE|TYMP|EPHB3|FGF2|CXCR3|HMOX1|HES1|NDST1|LRP5|SERPINF2|PTGS2|SOX4|TNFAIP2|WARS1|PLPP3|ADAM15|SOCS3|ADGRG1|CIB1|PIK3R6	-5.7	RNA_Keller_B-cells-CD21pos_infection_Up
Reactome Gene Sets	6	R-HSA-1280218	Adaptive Immune System		-8.1	3.8	7.4	30182	769	269	26	9.7	1.8	868|911|925|946|1174|1508|2533|3107|3134|5698|5795|7525|9021|9246|10125|10225|10288|11024|23547|26270|50852|54210|57823|84617|120425|146722	CBLB|CD1C|CD8A|SIGLEC6|AP1S1|CTSB|FYB1|HLA-C|HLA-F|PSMB9|PTPRJ|YES1|SOCS3|UBE2L6|RASGRP1|CD96|LILRB2|LILRA1|LILRA4|FBXO6|TRAT1|TREM1|SLAMF7|TUBB6|JAML|CD300LF	-5.6	RNA_Keller_B-cells-CD21pos_infection_Up
Reactome Gene Sets	6	R-HSA-877300	Interferon gamma signaling		-8	12	10	30182	92	269	10	3.7	1.2	2633|2634|3107|3134|4938|4940|6772|9021|115361|115362	GBP1|GBP2|HLA-C|HLA-F|OAS1|OAS3|STAT1|SOCS3|GBP4|GBP5	-5.5	RNA_Keller_B-cells-CD21pos_infection_Up
GO Biological Processes	19	GO:0002718	regulation of cytokine production involved in immune response	19_GO:0002376 immune system process	-8	10	9.7	30182	119	269	11	4.1	1.2	54|2867|3134|3162|5027|7133|8482|10225|10417|30009|64127	ACP5|FFAR2|HLA-F|HMOX1|P2RX7|TNFRSF1B|SEMA7A|CD96|SPON2|TBX21|NOD2	-5.5	RNA_Keller_B-cells-CD21pos_infection_Up
GO Biological Processes	19	GO:0001944	vasculature development	19_GO:0032502 developmental process	-7.9	4.5	7.6	30182	526	269	21	7.8	1.6	347|1636|1890|2049|2247|2833|3162|3280|3340|4041|5345|5743|6659|7127|7453|8613|8751|9021|9289|10519|146850	APOD|ACE|TYMP|EPHB3|FGF2|CXCR3|HMOX1|HES1|NDST1|LRP5|SERPINF2|PTGS2|SOX4|TNFAIP2|WARS1|PLPP3|ADAM15|SOCS3|ADGRG1|CIB1|PIK3R6	-5.4	RNA_Keller_B-cells-CD21pos_infection_Up
GO Biological Processes	19	GO:0051051	negative regulation of transport	19_GO:0051179 localization	-7.8	4.6	7.7	30182	483	269	20	7.4	1.6	20|347|1636|1742|2867|3134|3162|3280|3753|3767|3958|5743|5997|7133|8291|10288|23208|50852|146722|192683	ABCA2|APOD|ACE|DLG4|FFAR2|HLA-F|HMOX1|HES1|KCNE1|KCNJ11|LGALS3|PTGS2|RGS2|TNFRSF1B|DYSF|LILRB2|SYT11|TRAT1|CD300LF|SCAMP5	-5.3	RNA_Keller_B-cells-CD21pos_infection_Up
GO Biological Processes	19	GO:0045321	leukocyte activation	19_GO:0002376 immune system process	-7.8	4.2	7.5	30182	584	269	22	8.2	1.7	199|868|911|925|2529|3280|3601|4055|5027|5795|6556|6659|7480|8291|10125|10148|10312|10875|28639|30009|57823|120425	AIF1|CBLB|CD1C|CD8A|FUT7|HES1|IL15RA|LTBR|P2RX7|PTPRJ|SLC11A1|SOX4|WNT10B|DYSF|RASGRP1|EBI3|TCIRG1|FGL2|TRBC1|TBX21|SLAMF7|JAML	-5.3	RNA_Keller_B-cells-CD21pos_infection_Up
GO Biological Processes	19	GO:0050777	negative regulation of immune response	19_GO:0002376 immune system process	-7.7	7.6	8.7	30182	191	269	13	4.8	1.3	2268|3055|3134|3162|3958|4938|4940|7525|10225|10875|30009|64127|84166	FGR|HCK|HLA-F|HMOX1|LGALS3|OAS1|OAS3|YES1|CD96|FGL2|TBX21|NOD2|NLRC5	-5.3	RNA_Keller_B-cells-CD21pos_infection_Up
GO Biological Processes	19	GO:0002699	positive regulation of immune effector process	19_GO:0002376 immune system process	-7.7	6.3	8.3	30182	267	269	15	5.6	1.4	911|2242|2268|2867|3107|3134|3162|5027|5795|8482|10125|10417|30009|64127|78989	CD1C|FES|FGR|FFAR2|HLA-C|HLA-F|HMOX1|P2RX7|PTPRJ|SEMA7A|RASGRP1|SPON2|TBX21|NOD2|COLEC11	-5.3	RNA_Keller_B-cells-CD21pos_infection_Up
GO Biological Processes	19	GO:0002429	immune response-activating cell surface receptor signaling pathway	19_GO:0002376 immune system process	-7.6	6.8	8.4	30182	230	269	14	5.2	1.4	868|925|2268|2533|2867|3055|3502|4938|5795|7525|9473|28639|64127|78989	CBLB|CD8A|FGR|FYB1|FFAR2|HCK|IGHG3|OAS1|PTPRJ|YES1|THEMIS2|TRBC1|NOD2|COLEC11	-5.2	RNA_Keller_B-cells-CD21pos_infection_Up
GO Biological Processes	19	GO:0002695	negative regulation of leukocyte activation	19_GO:0002376 immune system process	-7.4	7.2	8.4	30182	202	269	13	4.8	1.3	868|2268|3134|3162|3958|7940|9231|10288|10875|23208|23495|30009|146722	CBLB|FGR|HLA-F|HMOX1|LGALS3|LST1|DLG5|LILRB2|FGL2|SYT11|TNFRSF13B|TBX21|CD300LF	-5.1	RNA_Keller_B-cells-CD21pos_infection_Up
GO Biological Processes	19	GO:0046649	lymphocyte activation	19_GO:0002376 immune system process	-7.3	4.6	7.4	30182	464	269	19	7.1	1.6	868|911|925|2529|3280|3601|5027|5795|6556|6659|7480|10125|10148|10312|10875|28639|30009|57823|120425	CBLB|CD1C|CD8A|FUT7|HES1|IL15RA|P2RX7|PTPRJ|SLC11A1|SOX4|WNT10B|RASGRP1|EBI3|TCIRG1|FGL2|TRBC1|TBX21|SLAMF7|JAML	-5	RNA_Keller_B-cells-CD21pos_infection_Up
GO Biological Processes	19	GO:0042327	positive regulation of phosphorylation	19_GO:0048518 positive regulation of biological process	-7.3	3.6	6.9	30182	786	269	25	9.3	1.8	199|355|1026|1636|1742|2247|2268|2621|3280|4058|5027|5743|5795|6556|7525|7786|8321|8412|8482|8613|10125|10519|64127|83666|146850	AIF1|FAS|CDKN1A|ACE|DLG4|FGF2|FGR|GAS6|HES1|LTK|P2RX7|PTGS2|PTPRJ|SLC11A1|YES1|MAP3K12|FZD1|BCAR3|SEMA7A|PLPP3|RASGRP1|CIB1|NOD2|PARP9|PIK3R6	-5	RNA_Keller_B-cells-CD21pos_infection_Up
GO Biological Processes	19	GO:0045088	regulation of innate immune response	19_GO:0044419 biological process involved in interspecies interaction between organisms	-7.3	5.1	7.6	30182	373	269	17	6.3	1.5	2268|2867|3055|3134|4210|4938|4940|10125|10225|23547|64127|78989|83666|84166|115362|146722|146850	FGR|FFAR2|HCK|HLA-F|MEFV|OAS1|OAS3|RASGRP1|CD96|LILRA4|NOD2|COLEC11|PARP9|NLRC5|GBP5|CD300LF|PIK3R6	-4.9	RNA_Keller_B-cells-CD21pos_infection_Up
GO Biological Processes	19	GO:0002703	regulation of leukocyte mediated immunity	19_GO:0002376 immune system process	-7.3	6.4	8	30182	246	269	14	5.2	1.4	911|2242|2268|2529|3107|3134|3162|5027|7133|10125|10225|30009|64127|146850	CD1C|FES|FGR|FUT7|HLA-C|HLA-F|HMOX1|P2RX7|TNFRSF1B|RASGRP1|CD96|TBX21|NOD2|PIK3R6	-4.9	RNA_Keller_B-cells-CD21pos_infection_Up
GO Biological Processes	19	GO:0048514	blood vessel morphogenesis	19_GO:0032502 developmental process	-7.3	4.8	7.4	30182	422	269	18	6.7	1.5	347|1636|1890|2049|2247|2833|3162|3280|4041|5345|5743|6659|7127|7453|8751|9289|10519|146850	APOD|ACE|TYMP|EPHB3|FGF2|CXCR3|HMOX1|HES1|LRP5|SERPINF2|PTGS2|SOX4|TNFAIP2|WARS1|ADAM15|ADGRG1|CIB1|PIK3R6	-4.9	RNA_Keller_B-cells-CD21pos_infection_Up
GO Biological Processes	19	GO:0010720	positive regulation of cell development	19_GO:0032502 developmental process	-7.1	4.7	7.3	30182	432	269	18	6.7	1.5	1636|1742|2242|2247|2621|3280|3601|4135|5176|6659|7133|7480|8482|10125|10154|10288|23654|146850	ACE|DLG4|FES|FGF2|GAS6|HES1|IL15RA|MAP6|SERPINF1|SOX4|TNFRSF1B|WNT10B|SEMA7A|RASGRP1|PLXNC1|LILRB2|PLXNB2|PIK3R6	-4.8	RNA_Keller_B-cells-CD21pos_infection_Up
GO Biological Processes	19	GO:0008283	cell population proliferation	19_GO:0009987 cellular process	-7	3.7	6.8	30182	699	269	23	8.6	1.7	868|1031|1636|2242|2247|2268|3162|3280|3340|4041|4058|5027|5176|5455|6556|6659|6772|7480|9289|10125|10148|10312|23654	CBLB|CDKN2C|ACE|FES|FGF2|FGR|HMOX1|HES1|NDST1|LRP5|LTK|P2RX7|SERPINF1|POU3F3|SLC11A1|SOX4|STAT1|WNT10B|ADGRG1|RASGRP1|EBI3|TCIRG1|PLXNB2	-4.7	RNA_Keller_B-cells-CD21pos_infection_Up
GO Biological Processes	19	GO:0031349	positive regulation of defense response	19_GO:0048518 positive regulation of biological process	-7	4.9	7.3	30182	391	269	17	6.3	1.5	1636|2867|3055|3134|4210|4938|4940|5743|10125|64127|78989|83666|84166|115362|146722|283131|440823	ACE|FFAR2|HCK|HLA-F|MEFV|OAS1|OAS3|PTGS2|RASGRP1|NOD2|COLEC11|PARP9|NLRC5|GBP5|CD300LF|NEAT1|MIAT	-4.7	RNA_Keller_B-cells-CD21pos_infection_Up
GO Biological Processes	19	GO:0006954	inflammatory response	19_GO:0050896 response to stimulus	-7	4.1	7	30182	541	269	20	7.4	1.6	199|2529|2833|2867|3055|3162|3340|4210|5027|5265|5345|5743|6556|7133|8482|9473|10125|10225|10312|115362	AIF1|FUT7|CXCR3|FFAR2|HCK|HMOX1|NDST1|MEFV|P2RX7|SERPINA1|SERPINF2|PTGS2|SLC11A1|TNFRSF1B|SEMA7A|THEMIS2|RASGRP1|CD96|TCIRG1|GBP5	-4.7	RNA_Keller_B-cells-CD21pos_infection_Up
GO Biological Processes	19	GO:0022407	regulation of cell-cell adhesion	19_GO:0050789 regulation of biological process	-7	4.3	7.1	30182	491	269	19	7.1	1.6	199|868|2049|2529|3280|3958|5345|6659|7480|7525|8613|9231|10125|10148|10288|10875|30009|64127|146850	AIF1|CBLB|EPHB3|FUT7|HES1|LGALS3|SERPINF2|SOX4|WNT10B|YES1|PLPP3|DLG5|RASGRP1|EBI3|LILRB2|FGL2|TBX21|NOD2|PIK3R6	-4.7	RNA_Keller_B-cells-CD21pos_infection_Up
GO Biological Processes	19	GO:0050866	negative regulation of cell activation	19_GO:0048519 negative regulation of biological process	-6.9	6.5	7.8	30182	225	269	13	4.8	1.3	868|2268|3134|3162|3958|7940|9231|10288|10875|23208|23495|30009|146722	CBLB|FGR|HLA-F|HMOX1|LGALS3|LST1|DLG5|LILRB2|FGL2|SYT11|TNFRSF13B|TBX21|CD300LF	-4.6	RNA_Keller_B-cells-CD21pos_infection_Up
GO Biological Processes	19	GO:0001934	positive regulation of protein phosphorylation	19_GO:0048518 positive regulation of biological process	-6.8	3.6	6.7	30182	718	269	23	8.6	1.7	199|355|1026|1636|1742|2247|2621|3280|5027|5743|5795|6556|7525|7786|8321|8412|8482|8613|10125|10519|64127|83666|146850	AIF1|FAS|CDKN1A|ACE|DLG4|FGF2|GAS6|HES1|P2RX7|PTGS2|PTPRJ|SLC11A1|YES1|MAP3K12|FZD1|BCAR3|SEMA7A|PLPP3|RASGRP1|CIB1|NOD2|PARP9|PIK3R6	-4.6	RNA_Keller_B-cells-CD21pos_infection_Up
GO Biological Processes	19	GO:0008015	blood circulation	19_GO:0032501 multicellular organismal process	-6.8	4.7	7.2	30182	403	269	17	6.3	1.5	1636|2621|2784|3162|3753|4041|5029|5125|5345|5743|5795|5973|5997|6772|7273|7525|11156	ACE|GAS6|GNB3|HMOX1|KCNE1|LRP5|P2RY2|PCSK5|SERPINF2|PTGS2|PTPRJ|RENBP|RGS2|STAT1|TTN|YES1|PTP4A3	-4.6	RNA_Keller_B-cells-CD21pos_infection_Up
GO Biological Processes	19	GO:0043549	regulation of kinase activity	19_GO:0008152 metabolic process	-6.8	3.6	6.7	30182	720	269	23	8.6	1.7	868|1026|1031|1636|1742|2247|2268|2621|4041|4058|5027|5795|5997|6556|7273|7453|7786|9961|10125|10519|64127|84166|146850	CBLB|CDKN1A|CDKN2C|ACE|DLG4|FGF2|FGR|GAS6|LRP5|LTK|P2RX7|PTPRJ|RGS2|SLC11A1|TTN|WARS1|MAP3K12|MVP|RASGRP1|CIB1|NOD2|NLRC5|PIK3R6	-4.6	RNA_Keller_B-cells-CD21pos_infection_Up
GO Biological Processes	19	GO:0002833	positive regulation of response to biotic stimulus	19_GO:0048518 positive regulation of biological process	-6.7	5.7	7.4	30182	275	269	14	5.2	1.4	2867|3055|3134|4210|4938|4940|10125|64127|78989|83666|84166|115362|146722|440823	FFAR2|HCK|HLA-F|MEFV|OAS1|OAS3|RASGRP1|NOD2|COLEC11|PARP9|NLRC5|GBP5|CD300LF|MIAT	-4.5	RNA_Keller_B-cells-CD21pos_infection_Up
GO Biological Processes	19	GO:0050727	regulation of inflammatory response	19_GO:0050896 response to stimulus	-6.6	4.6	7	30182	414	269	17	6.3	1.5	54|1636|2268|2529|2867|3055|4210|5176|5743|7133|7525|8482|9021|23208|64127|283131|284207	ACP5|ACE|FGR|FUT7|FFAR2|HCK|MEFV|SERPINF1|PTGS2|TNFRSF1B|YES1|SEMA7A|SOCS3|SYT11|NOD2|NEAT1|METRNL	-4.4	RNA_Keller_B-cells-CD21pos_infection_Up
GO Biological Processes	19	GO:0045859	regulation of protein kinase activity	19_GO:0008152 metabolic process	-6.6	3.8	6.6	30182	627	269	21	7.8	1.6	868|1026|1031|1636|1742|2247|2268|2621|4041|5027|5795|5997|6556|7273|7453|7786|9961|10125|10519|64127|146850	CBLB|CDKN1A|CDKN2C|ACE|DLG4|FGF2|FGR|GAS6|LRP5|P2RX7|PTPRJ|RGS2|SLC11A1|TTN|WARS1|MAP3K12|MVP|RASGRP1|CIB1|NOD2|PIK3R6	-4.4	RNA_Keller_B-cells-CD21pos_infection_Up
GO Biological Processes	19	GO:0001818	negative regulation of cytokine production	19_GO:0048519 negative regulation of biological process	-6.6	4.8	7.1	30182	371	269	16	5.9	1.4	54|307|347|2621|2633|3134|3162|4210|4938|4940|6556|10225|23208|23547|30009|64127	ACP5|ANXA4|APOD|GAS6|GBP1|HLA-F|HMOX1|MEFV|OAS1|OAS3|SLC11A1|CD96|SYT11|LILRA4|TBX21|NOD2	-4.4	RNA_Keller_B-cells-CD21pos_infection_Up
GO Biological Processes	19	GO:0051251	positive regulation of lymphocyte activation	19_GO:0002376 immune system process	-6.5	5.1	7.1	30182	327	269	15	5.6	1.4	199|1026|2621|3134|3280|3601|6659|7480|7525|10125|10148|10288|30009|64127|146850	AIF1|CDKN1A|GAS6|HLA-F|HES1|IL15RA|SOX4|WNT10B|YES1|RASGRP1|EBI3|LILRB2|TBX21|NOD2|PIK3R6	-4.4	RNA_Keller_B-cells-CD21pos_infection_Up
GO Biological Processes	19	GO:0002696	positive regulation of leukocyte activation	19_GO:0002376 immune system process	-6.5	4.8	7	30182	377	269	16	5.9	1.4	199|1026|2268|2621|3134|3280|3601|6659|7480|7525|10125|10148|10288|30009|64127|146850	AIF1|CDKN1A|FGR|GAS6|HLA-F|HES1|IL15RA|SOX4|WNT10B|YES1|RASGRP1|EBI3|LILRB2|TBX21|NOD2|PIK3R6	-4.3	RNA_Keller_B-cells-CD21pos_infection_Up
GO Biological Processes	19	GO:0050863	regulation of T cell activation	19_GO:0002376 immune system process	-6.5	4.8	7	30182	377	269	16	5.9	1.4	199|868|3280|3958|6659|7133|7480|7525|9231|10125|10148|10288|10875|30009|64127|146850	AIF1|CBLB|HES1|LGALS3|SOX4|TNFRSF1B|WNT10B|YES1|DLG5|RASGRP1|EBI3|LILRB2|FGL2|TBX21|NOD2|PIK3R6	-4.3	RNA_Keller_B-cells-CD21pos_infection_Up
GO Biological Processes	19	GO:1903037	regulation of leukocyte cell-cell adhesion	19_GO:0050789 regulation of biological process	-6.5	4.7	7	30182	378	269	16	5.9	1.4	199|868|2529|3280|3958|6659|7480|7525|9231|10125|10148|10288|10875|30009|64127|146850	AIF1|CBLB|FUT7|HES1|LGALS3|SOX4|WNT10B|YES1|DLG5|RASGRP1|EBI3|LILRB2|FGL2|TBX21|NOD2|PIK3R6	-4.3	RNA_Keller_B-cells-CD21pos_infection_Up
GO Biological Processes	19	GO:0045089	positive regulation of innate immune response	19_GO:0044419 biological process involved in interspecies interaction between organisms	-6.4	5.9	7.3	30182	247	269	13	4.8	1.3	2867|3055|3134|4210|4938|4940|10125|64127|78989|83666|84166|115362|146722	FFAR2|HCK|HLA-F|MEFV|OAS1|OAS3|RASGRP1|NOD2|COLEC11|PARP9|NLRC5|GBP5|CD300LF	-4.3	RNA_Keller_B-cells-CD21pos_infection_Up
GO Biological Processes	19	GO:0001775	cell activation	19_GO:0032501 multicellular organismal process	-6.4	3.5	6.4	30182	705	269	22	8.2	1.7	199|868|911|925|2529|3280|3601|4055|5027|5795|6556|6659|7480|8291|10125|10148|10312|10875|28639|30009|57823|120425	AIF1|CBLB|CD1C|CD8A|FUT7|HES1|IL15RA|LTBR|P2RX7|PTPRJ|SLC11A1|SOX4|WNT10B|DYSF|RASGRP1|EBI3|TCIRG1|FGL2|TRBC1|TBX21|SLAMF7|JAML	-4.2	RNA_Keller_B-cells-CD21pos_infection_Up
GO Biological Processes	19	GO:0003013	circulatory system process	19_GO:0032501 multicellular organismal process	-6.2	4.1	6.6	30182	495	269	18	6.7	1.5	20|1636|2621|2784|3162|3753|4041|5029|5125|5345|5743|5795|5973|5997|6772|7273|7525|11156	ABCA2|ACE|GAS6|GNB3|HMOX1|KCNE1|LRP5|P2RY2|PCSK5|SERPINF2|PTGS2|PTPRJ|RENBP|RGS2|STAT1|TTN|YES1|PTP4A3	-4.1	RNA_Keller_B-cells-CD21pos_infection_Up
GO Biological Processes	19	GO:0050867	positive regulation of cell activation	19_GO:0048518 positive regulation of biological process	-6.2	4.6	6.7	30182	394	269	16	5.9	1.4	199|1026|2268|2621|3134|3280|3601|6659|7480|7525|10125|10148|10288|30009|64127|146850	AIF1|CDKN1A|FGR|GAS6|HLA-F|HES1|IL15RA|SOX4|WNT10B|YES1|RASGRP1|EBI3|LILRB2|TBX21|NOD2|PIK3R6	-4.1	RNA_Keller_B-cells-CD21pos_infection_Up
GO Biological Processes	19	GO:0002719	negative regulation of cytokine production involved in immune response	19_GO:0002376 immune system process	-6.2	19	10	30182	35	269	6	2.2	0.9	54|3134|3162|10225|30009|64127	ACP5|HLA-F|HMOX1|CD96|TBX21|NOD2	-4.1	RNA_Keller_B-cells-CD21pos_infection_Up
GO Biological Processes	19	GO:0008285	negative regulation of cell population proliferation	19_GO:0048519 negative regulation of biological process	-6.1	3.3	6.1	30182	787	269	23	8.6	1.7	199|347|868|1026|1031|2247|3162|3280|5176|5743|5795|6282|6659|6772|7041|7453|7480|7940|9231|9289|10288|10519|23495	AIF1|APOD|CBLB|CDKN1A|CDKN2C|FGF2|HMOX1|HES1|SERPINF1|PTGS2|PTPRJ|S100A11|SOX4|STAT1|TGFB1I1|WARS1|WNT10B|LST1|DLG5|ADGRG1|LILRB2|CIB1|TNFRSF13B	-4	RNA_Keller_B-cells-CD21pos_infection_Up
GO Biological Processes	19	GO:0035239	tube morphogenesis	19_GO:0032502 developmental process	-6.1	3.5	6.2	30182	670	269	21	7.8	1.6	347|1636|1890|2049|2247|2833|3162|3280|4041|5345|5743|6659|7127|7453|8321|8751|9231|9289|10519|23654|146850	APOD|ACE|TYMP|EPHB3|FGF2|CXCR3|HMOX1|HES1|LRP5|SERPINF2|PTGS2|SOX4|TNFAIP2|WARS1|FZD1|ADAM15|DLG5|ADGRG1|CIB1|PLXNB2|PIK3R6	-4	RNA_Keller_B-cells-CD21pos_infection_Up
GO Biological Processes	19	GO:0002706	regulation of lymphocyte mediated immunity	19_GO:0002376 immune system process	-6	6.7	7.4	30182	184	269	11	4.1	1.2	911|2529|3107|3134|5027|7133|10125|10225|30009|64127|146850	CD1C|FUT7|HLA-C|HLA-F|P2RX7|TNFRSF1B|RASGRP1|CD96|TBX21|NOD2|PIK3R6	-4	RNA_Keller_B-cells-CD21pos_infection_Up
KEGG Pathway	24	hsa04621	NOD-like receptor signaling pathway		-6	6.6	7.3	30182	186	269	11	4.1	1.2	1508|2633|2634|4210|4938|4940|5027|6772|64127|115361|115362	CTSB|GBP1|GBP2|MEFV|OAS1|OAS3|P2RX7|STAT1|NOD2|GBP4|GBP5	-3.9	RNA_Keller_B-cells-CD21pos_infection_Up
GO Biological Processes	19	GO:0050728	negative regulation of inflammatory response	19_GO:0048519 negative regulation of biological process	-6	6.6	7.3	30182	187	269	11	4.1	1.2	54|2268|3055|4210|5176|7133|7525|9021|23208|64127|284207	ACP5|FGR|HCK|MEFV|SERPINF1|TNFRSF1B|YES1|SOCS3|SYT11|NOD2|METRNL	-3.9	RNA_Keller_B-cells-CD21pos_infection_Up
GO Biological Processes	19	GO:0002700	regulation of production of molecular mediator of immune response	19_GO:0002376 immune system process	-5.9	6.5	7.2	30182	189	269	11	4.1	1.2	54|2867|3134|3162|5027|7133|8482|10225|10417|30009|64127	ACP5|FFAR2|HLA-F|HMOX1|P2RX7|TNFRSF1B|SEMA7A|CD96|SPON2|TBX21|NOD2	-3.9	RNA_Keller_B-cells-CD21pos_infection_Up
GO Biological Processes	19	GO:0043408	regulation of MAPK cascade	19_GO:0023052 signaling	-5.9	3.4	6	30182	695	269	21	7.8	1.6	355|1848|2247|2621|2633|3340|4055|5027|5345|5795|5997|7786|8412|8482|10125|10519|64127|79930|146850|151306|285613	FAS|DUSP6|FGF2|GAS6|GBP1|NDST1|LTBR|P2RX7|SERPINF2|PTPRJ|RGS2|MAP3K12|BCAR3|SEMA7A|RASGRP1|CIB1|NOD2|DOK3|PIK3R6|GPBAR1|RELL2	-3.8	RNA_Keller_B-cells-CD21pos_infection_Up
Reactome Gene Sets	6	R-HSA-449147	Signaling by Interleukins		-5.8	4	6.3	30182	473	269	17	6.3	1.5	1026|1848|2247|3055|3162|3587|3601|3687|5698|5743|6772|7133|7525|9021|10148|64127|84166	CDKN1A|DUSP6|FGF2|HCK|HMOX1|IL10RA|IL15RA|ITGAX|PSMB9|PTGS2|STAT1|TNFRSF1B|YES1|SOCS3|EBI3|NOD2|NLRC5	-3.8	RNA_Keller_B-cells-CD21pos_infection_Up
GO Biological Processes	19	GO:0060627	regulation of vesicle-mediated transport	19_GO:0051179 localization	-5.8	3.8	6.2	30182	530	269	18	6.7	1.5	20|1742|2242|2268|2621|3055|3134|3162|3601|3958|5795|6556|8291|23208|64127|78989|146722|192683	ABCA2|DLG4|FES|FGR|GAS6|HCK|HLA-F|HMOX1|IL15RA|LGALS3|PTPRJ|SLC11A1|DYSF|SYT11|NOD2|COLEC11|CD300LF|SCAMP5	-3.8	RNA_Keller_B-cells-CD21pos_infection_Up
GO Biological Processes	19	GO:0001525	angiogenesis	19_GO:0032502 developmental process	-5.8	4.8	6.6	30182	326	269	14	5.2	1.4	347|1636|1890|2049|2247|2833|3162|5743|7127|7453|8751|9289|10519|146850	APOD|ACE|TYMP|EPHB3|FGF2|CXCR3|HMOX1|PTGS2|TNFAIP2|WARS1|ADAM15|ADGRG1|CIB1|PIK3R6	-3.8	RNA_Keller_B-cells-CD21pos_infection_Up
GO Biological Processes	19	GO:0045785	positive regulation of cell adhesion	19_GO:0048518 positive regulation of biological process	-5.7	4	6.2	30182	482	269	17	6.3	1.5	199|2529|3280|5345|5795|6659|7480|7525|8613|9289|10125|10148|10288|10519|64127|146850|285613	AIF1|FUT7|HES1|SERPINF2|PTPRJ|SOX4|WNT10B|YES1|PLPP3|ADGRG1|RASGRP1|EBI3|LILRB2|CIB1|NOD2|PIK3R6|RELL2	-3.7	RNA_Keller_B-cells-CD21pos_infection_Up
Reactome Gene Sets	6	R-HSA-913531	Interferon Signaling		-5.7	6.2	7	30182	200	269	11	4.1	1.2	2633|2634|3107|3134|4938|4940|6772|9021|9246|115361|115362	GBP1|GBP2|HLA-C|HLA-F|OAS1|OAS3|STAT1|SOCS3|UBE2L6|GBP4|GBP5	-3.7	RNA_Keller_B-cells-CD21pos_infection_Up
GO Biological Processes	19	GO:0007229	integrin-mediated signaling pathway	19_GO:0023052 signaling	-5.7	9.5	7.9	30182	94	269	8	3	1	667|2268|2533|3055|3687|8482|8613|8751	DST|FGR|FYB1|HCK|ITGAX|SEMA7A|PLPP3|ADAM15	-3.7	RNA_Keller_B-cells-CD21pos_infection_Up
GO Biological Processes	19	GO:0034341	response to type II interferon	19_GO:0044419 biological process involved in interspecies interaction between organisms	-5.7	8	7.5	30182	126	269	9	3.3	1.1	199|2633|2634|3055|4210|6556|6772|115361|115362	AIF1|GBP1|GBP2|HCK|MEFV|SLC11A1|STAT1|GBP4|GBP5	-3.7	RNA_Keller_B-cells-CD21pos_infection_Up
GO Biological Processes	19	GO:0031344	regulation of cell projection organization	19_GO:0050789 regulation of biological process	-5.6	3.4	5.9	30182	660	269	20	7.4	1.6	1742|2049|2242|3280|4058|4135|4343|5027|5064|5176|5997|8321|8482|10154|10519|23654|51225|64787|65078|348110	DLG4|EPHB3|FES|HES1|LTK|MAP6|MOV10|P2RX7|PALM|SERPINF1|RGS2|FZD1|SEMA7A|PLXNC1|CIB1|PLXNB2|ABI3|EPS8L2|RTN4R|ARPIN	-3.6	RNA_Keller_B-cells-CD21pos_infection_Up
KEGG Pathway	24	hsa04380	Osteoclast differentiation		-5.6	7.9	7.4	30182	128	269	9	3.3	1.1	54|2212|6772|9021|9103|10288|11024|23547|79168	ACP5|FCGR2A|STAT1|SOCS3|FCGR2C|LILRB2|LILRA1|LILRA4|LILRA6	-3.6	RNA_Keller_B-cells-CD21pos_infection_Up
GO Biological Processes	19	GO:0002709	regulation of T cell mediated immunity	19_GO:0002376 immune system process	-5.6	9.3	7.7	30182	97	269	8	3	1	911|2529|3107|3134|5027|7133|30009|64127	CD1C|FUT7|HLA-C|HLA-F|P2RX7|TNFRSF1B|TBX21|NOD2	-3.6	RNA_Keller_B-cells-CD21pos_infection_Up
GO Biological Processes	19	GO:0043410	positive regulation of MAPK cascade	19_GO:0023052 signaling	-5.6	3.9	6.1	30182	495	269	17	6.3	1.5	2247|2621|3340|4055|5027|5345|5795|7786|8412|8482|10125|10519|64127|79930|146850|151306|285613	FGF2|GAS6|NDST1|LTBR|P2RX7|SERPINF2|PTPRJ|MAP3K12|BCAR3|SEMA7A|RASGRP1|CIB1|NOD2|DOK3|PIK3R6|GPBAR1|RELL2	-3.6	RNA_Keller_B-cells-CD21pos_infection_Up
GO Biological Processes	19	GO:0043086	negative regulation of catalytic activity	19_GO:0065007 biological regulation	-5.6	3.4	5.9	30182	666	269	20	7.4	1.6	868|1026|1031|1508|2621|3958|4041|5064|5176|5265|5345|5743|5795|5973|5997|7453|9961|83666|94103|221476	CBLB|CDKN1A|CDKN2C|CTSB|GAS6|LGALS3|LRP5|PALM|SERPINF1|SERPINA1|SERPINF2|PTGS2|PTPRJ|RENBP|RGS2|WARS1|MVP|PARP9|ORMDL3|PI16	-3.6	RNA_Keller_B-cells-CD21pos_infection_Up
GO Biological Processes	19	GO:0032642	regulation of chemokine production	19_GO:0032501 multicellular organismal process	-5.5	9.2	7.7	30182	98	269	8	3	1	199|347|2867|3162|4210|4938|4940|64127	AIF1|APOD|FFAR2|HMOX1|MEFV|OAS1|OAS3|NOD2	-3.6	RNA_Keller_B-cells-CD21pos_infection_Up
Reactome Gene Sets	6	R-HSA-2029481	FCGR activation		-5.5	37	12	30182	12	269	4	1.5	0.74	2212|2268|3055|7525	FCGR2A|FGR|HCK|YES1	-3.6	RNA_Keller_B-cells-CD21pos_infection_Up
GO Biological Processes	19	GO:0051250	negative regulation of lymphocyte activation	19_GO:0002376 immune system process	-5.5	6.7	7	30182	168	269	10	3.7	1.2	868|2268|3134|3958|7940|9231|10288|10875|23495|30009	CBLB|FGR|HLA-F|LGALS3|LST1|DLG5|LILRB2|FGL2|TNFRSF13B|TBX21	-3.6	RNA_Keller_B-cells-CD21pos_infection_Up
GO Biological Processes	19	GO:0050730	regulation of peptidyl-tyrosine phosphorylation	19_GO:0008152 metabolic process	-5.5	5.3	6.5	30182	255	269	12	4.5	1.3	868|1636|1742|2621|3280|5795|7525|8613|9021|9961|64127|83666	CBLB|ACE|DLG4|GAS6|HES1|PTPRJ|YES1|PLPP3|SOCS3|MVP|NOD2|PARP9	-3.5	RNA_Keller_B-cells-CD21pos_infection_Up
Reactome Gene Sets	6	R-HSA-909733	Interferon alpha/beta signaling		-5.4	11	8	30182	72	269	7	2.6	0.97	2634|3107|3134|4938|4940|6772|9021	GBP2|HLA-C|HLA-F|OAS1|OAS3|STAT1|SOCS3	-3.5	RNA_Keller_B-cells-CD21pos_infection_Up
GO Biological Processes	19	GO:0002701	negative regulation of production of molecular mediator of immune response	19_GO:0002376 immune system process	-5.4	14	8.7	30182	47	269	6	2.2	0.9	54|3134|3162|10225|30009|64127	ACP5|HLA-F|HMOX1|CD96|TBX21|NOD2	-3.5	RNA_Keller_B-cells-CD21pos_infection_Up
GO Biological Processes	19	GO:0050766	positive regulation of phagocytosis	19_GO:0051179 localization	-5.4	11	7.9	30182	73	269	7	2.6	0.97	2621|3601|5795|6556|64127|78989|146722	GAS6|IL15RA|PTPRJ|SLC11A1|NOD2|COLEC11|CD300LF	-3.5	RNA_Keller_B-cells-CD21pos_infection_Up
GO Biological Processes	19	GO:0030148	sphingolipid biosynthetic process	19_GO:0008152 metabolic process	-5.4	8.6	7.4	30182	104	269	8	3	1	20|2055|5027|8613|8869|81537|94103|124976	ABCA2|CLN8|P2RX7|PLPP3|ST3GAL5|SGPP1|ORMDL3|SPNS2	-3.4	RNA_Keller_B-cells-CD21pos_infection_Up
GO Biological Processes	19	GO:1903829	positive regulation of protein localization	19_GO:0051179 localization	-5.3	3.8	5.9	30182	467	269	16	5.9	1.4	1742|2621|2696|2867|3958|5027|5743|6659|7273|10519|11156|23208|27113|83666|94103|246329	DLG4|GAS6|GIPR|FFAR2|LGALS3|P2RX7|PTGS2|SOX4|TTN|CIB1|PTP4A3|SYT11|BBC3|PARP9|ORMDL3|STAC3	-3.4	RNA_Keller_B-cells-CD21pos_infection_Up
GO Biological Processes	19	GO:0019221	cytokine-mediated signaling pathway	19_GO:0023052 signaling	-5.3	4.3	6	30182	363	269	14	5.2	1.4	355|2833|3055|3601|4938|5795|6772|7133|10148|10288|10519|11024|23547|146722	FAS|CXCR3|HCK|IL15RA|OAS1|PTPRJ|STAT1|TNFRSF1B|EBI3|LILRB2|CIB1|LILRA1|LILRA4|CD300LF	-3.4	RNA_Keller_B-cells-CD21pos_infection_Up
GO Biological Processes	19	GO:0002250	adaptive immune response	19_GO:0002376 immune system process	-5.3	3.5	5.7	30182	581	269	18	6.7	1.5	716|911|925|3107|3502|5027|10148|10288|10312|11024|23495|28639|30009|50852|54210|57823|79168|83417	C1S|CD1C|CD8A|HLA-C|IGHG3|P2RX7|EBI3|LILRB2|TCIRG1|LILRA1|TNFRSF13B|TRBC1|TBX21|TRAT1|TREM1|SLAMF7|LILRA6|FCRL4	-3.4	RNA_Keller_B-cells-CD21pos_infection_Up
GO Biological Processes	19	GO:0014074	response to purine-containing compound	19_GO:0050896 response to stimulus	-5.2	7.1	6.9	30182	143	269	9	3.3	1.1	366|3753|3767|5027|5029|5743|6261|6772|7480	AQP9|KCNE1|KCNJ11|P2RX7|P2RY2|PTGS2|RYR1|STAT1|WNT10B	-3.4	RNA_Keller_B-cells-CD21pos_infection_Up
Reactome Gene Sets	6	R-HSA-6785807	Interleukin-4 and Interleukin-13 signaling		-5.2	8.3	7.2	30182	108	269	8	3	1	1026|2247|3162|3687|5743|6772|7133|9021	CDKN1A|FGF2|HMOX1|ITGAX|PTGS2|STAT1|TNFRSF1B|SOCS3	-3.4	RNA_Keller_B-cells-CD21pos_infection_Up
GO Biological Processes	19	GO:0071396	cellular response to lipid	19_GO:0050896 response to stimulus	-5.2	3.6	5.8	30182	527	269	17	6.3	1.5	1636|2242|2867|3055|3280|4058|5176|7133|7480|7525|8751|10288|10417|11240|55809|64127|151306	ACE|FES|FFAR2|HCK|HES1|LTK|SERPINF1|TNFRSF1B|WNT10B|YES1|ADAM15|LILRB2|SPON2|PADI2|TRERF1|NOD2|GPBAR1	-3.3	RNA_Keller_B-cells-CD21pos_infection_Up
GO Biological Processes	19	GO:0120035	regulation of plasma membrane bounded cell projection organization	19_GO:0050789 regulation of biological process	-5.2	3.3	5.6	30182	645	269	19	7.1	1.6	1742|2049|2242|3280|4058|4135|5027|5064|5176|5997|8321|8482|10154|10519|23654|51225|64787|65078|348110	DLG4|EPHB3|FES|HES1|LTK|MAP6|P2RX7|PALM|SERPINF1|RGS2|FZD1|SEMA7A|PLXNC1|CIB1|PLXNB2|ABI3|EPS8L2|RTN4R|ARPIN	-3.3	RNA_Keller_B-cells-CD21pos_infection_Up
GO Biological Processes	19	GO:0002685	regulation of leukocyte migration	19_GO:0040011 locomotion	-5.2	5.4	6.4	30182	227	269	11	4.1	1.2	199|347|2529|2621|2833|3162|3958|11240|23604|64127|124976	AIF1|APOD|FUT7|GAS6|CXCR3|HMOX1|LGALS3|PADI2|DAPK2|NOD2|SPNS2	-3.3	RNA_Keller_B-cells-CD21pos_infection_Up
GO Biological Processes	19	GO:0032680	regulation of tumor necrosis factor production	19_GO:0032501 multicellular organismal process	-5.2	6.1	6.6	30182	185	269	10	3.7	1.2	54|2621|4938|4940|5795|10125|10417|23208|23547|64127	ACP5|GAS6|OAS1|OAS3|PTPRJ|RASGRP1|SPON2|SYT11|LILRA4|NOD2	-3.3	RNA_Keller_B-cells-CD21pos_infection_Up
GO Biological Processes	19	GO:0022409	positive regulation of cell-cell adhesion	19_GO:0048518 positive regulation of biological process	-5.1	4.5	6.1	30182	321	269	13	4.8	1.3	199|2529|3280|5345|6659|7480|7525|8613|10125|10148|10288|64127|146850	AIF1|FUT7|HES1|SERPINF2|SOX4|WNT10B|YES1|PLPP3|RASGRP1|EBI3|LILRB2|NOD2|PIK3R6	-3.3	RNA_Keller_B-cells-CD21pos_infection_Up
GO Biological Processes	19	GO:0002720	positive regulation of cytokine production involved in immune response	19_GO:0002376 immune system process	-5.1	9.8	7.5	30182	80	269	7	2.6	0.97	2867|3134|5027|8482|10417|30009|64127	FFAR2|HLA-F|P2RX7|SEMA7A|SPON2|TBX21|NOD2	-3.3	RNA_Keller_B-cells-CD21pos_infection_Up
GO Biological Processes	19	GO:1903555	regulation of tumor necrosis factor superfamily cytokine production	19_GO:0032501 multicellular organismal process	-5.1	5.9	6.4	30182	190	269	10	3.7	1.2	54|2621|4938|4940|5795|10125|10417|23208|23547|64127	ACP5|GAS6|OAS1|OAS3|PTPRJ|RASGRP1|SPON2|SYT11|LILRA4|NOD2	-3.2	RNA_Keller_B-cells-CD21pos_infection_Up
GO Biological Processes	19	GO:0051962	positive regulation of nervous system development	19_GO:0032502 developmental process	-5	4.8	6.1	30182	280	269	12	4.5	1.3	1636|1742|2049|2247|3280|4135|5176|7133|8482|9231|10154|23654	ACE|DLG4|EPHB3|FGF2|HES1|MAP6|SERPINF1|TNFRSF1B|SEMA7A|DLG5|PLXNC1|PLXNB2	-3.2	RNA_Keller_B-cells-CD21pos_infection_Up
KEGG Pathway	24	hsa05167	Kaposi sarcoma-associated herpesvirus infection		-5	5.8	6.3	30182	194	269	10	3.7	1.2	355|1026|2247|2784|3055|3107|3134|5743|6772|146850	FAS|CDKN1A|FGF2|GNB3|HCK|HLA-C|HLA-F|PTGS2|STAT1|PIK3R6	-3.2	RNA_Keller_B-cells-CD21pos_infection_Up
GO Biological Processes	19	GO:0050873	brown fat cell differentiation	19_GO:0032502 developmental process	-5	17	8.7	30182	33	269	5	1.9	0.82	5743|5997|63976|116844|284207	PTGS2|RGS2|PRDM16|LRG1|METRNL	-3.2	RNA_Keller_B-cells-CD21pos_infection_Up
GO Biological Processes	19	GO:0050670	regulation of lymphocyte proliferation	19_GO:0002376 immune system process	-5	5.2	6.1	30182	239	269	11	4.1	1.2	199|868|1026|3280|3958|7133|7940|9231|10148|10288|23495	AIF1|CBLB|CDKN1A|HES1|LGALS3|TNFRSF1B|LST1|DLG5|EBI3|LILRB2|TNFRSF13B	-3.1	RNA_Keller_B-cells-CD21pos_infection_Up
GO Biological Processes	19	GO:0006665	sphingolipid metabolic process	19_GO:0008152 metabolic process	-4.9	6.5	6.5	30182	155	269	9	3.3	1.1	20|2055|2529|5027|8613|8869|81537|94103|124976	ABCA2|CLN8|FUT7|P2RX7|PLPP3|ST3GAL5|SGPP1|ORMDL3|SPNS2	-3.1	RNA_Keller_B-cells-CD21pos_infection_Up
GO Biological Processes	19	GO:0045444	fat cell differentiation	19_GO:0032502 developmental process	-4.9	7.5	6.8	30182	119	269	8	3	1	2867|5743|5997|7041|7480|63976|116844|284207	FFAR2|PTGS2|RGS2|TGFB1I1|WNT10B|PRDM16|LRG1|METRNL	-3.1	RNA_Keller_B-cells-CD21pos_infection_Up
GO Biological Processes	19	GO:0030901	midbrain development	19_GO:0032502 developmental process	-4.9	9.1	7.2	30182	86	269	7	2.6	0.97	2247|3280|3340|8321|9143|9231|11240	FGF2|HES1|NDST1|FZD1|SYNGR3|DLG5|PADI2	-3.1	RNA_Keller_B-cells-CD21pos_infection_Up
GO Biological Processes	19	GO:0048871	multicellular organismal homeostasis	19_GO:0042592 homeostatic process	-4.9	3.4	5.5	30182	559	269	17	6.3	1.5	54|216|355|2055|3162|3502|4938|5027|5743|6556|6659|9289|10312|23495|64127|124976|284207	ACP5|ALDH1A1|FAS|CLN8|HMOX1|IGHG3|OAS1|P2RX7|PTGS2|SLC11A1|SOX4|ADGRG1|TCIRG1|TNFRSF13B|NOD2|SPNS2|METRNL	-3.1	RNA_Keller_B-cells-CD21pos_infection_Up
GO Biological Processes	19	GO:0032944	regulation of mononuclear cell proliferation	19_GO:0050789 regulation of biological process	-4.9	5.1	6.1	30182	243	269	11	4.1	1.2	199|868|1026|3280|3958|7133|7940|9231|10148|10288|23495	AIF1|CBLB|CDKN1A|HES1|LGALS3|TNFRSF1B|LST1|DLG5|EBI3|LILRB2|TNFRSF13B	-3.1	RNA_Keller_B-cells-CD21pos_infection_Up
GO Biological Processes	19	GO:0002758	innate immune response-activating signaling pathway	19_GO:0044419 biological process involved in interspecies interaction between organisms	-4.9	7.4	6.7	30182	121	269	8	3	1	2867|3055|4210|4938|4940|64127|78989|146722	FFAR2|HCK|MEFV|OAS1|OAS3|NOD2|COLEC11|CD300LF	-3.1	RNA_Keller_B-cells-CD21pos_infection_Up
GO Biological Processes	19	GO:0022604	regulation of cell morphogenesis	19_GO:0032502 developmental process	-4.9	5	6	30182	245	269	11	4.1	1.2	1742|2242|2268|3055|4343|5064|7940|10154|23654|57699|348110	DLG4|FES|FGR|HCK|MOV10|PALM|LST1|PLXNC1|PLXNB2|CPNE5|ARPIN	-3.1	RNA_Keller_B-cells-CD21pos_infection_Up
GO Biological Processes	19	GO:0002698	negative regulation of immune effector process	19_GO:0002376 immune system process	-4.8	7.4	6.7	30182	122	269	8	3	1	54|3134|3162|3958|10225|10875|30009|64127	ACP5|HLA-F|HMOX1|LGALS3|CD96|FGL2|TBX21|NOD2	-3.1	RNA_Keller_B-cells-CD21pos_infection_Up
GO Biological Processes	19	GO:0042742	defense response to bacterium	19_GO:0044419 biological process involved in interspecies interaction between organisms	-4.8	4.6	5.8	30182	294	269	12	4.5	1.3	54|2268|2634|4938|4940|5027|6556|10417|54210|55876|64127|115361	ACP5|FGR|GBP2|OAS1|OAS3|P2RX7|SLC11A1|SPON2|TREM1|GSDMB|NOD2|GBP4	-3	RNA_Keller_B-cells-CD21pos_infection_Up
GO Biological Processes	19	GO:0010975	regulation of neuron projection development	19_GO:0032502 developmental process	-4.8	3.7	5.5	30182	452	269	15	5.6	1.4	1742|2049|2242|3280|4058|4135|5176|5997|8321|8482|10154|10519|23654|51225|65078	DLG4|EPHB3|FES|HES1|LTK|MAP6|SERPINF1|RGS2|FZD1|SEMA7A|PLXNC1|CIB1|PLXNB2|ABI3|RTN4R	-3	RNA_Keller_B-cells-CD21pos_infection_Up
GO Biological Processes	19	GO:0071407	cellular response to organic cyclic compound	19_GO:0050896 response to stimulus	-4.8	3.5	5.4	30182	510	269	16	5.9	1.4	199|366|1636|2242|3753|5027|5029|5176|5743|6261|6772|7480|11240|55809|64127|151306	AIF1|AQP9|ACE|FES|KCNE1|P2RX7|P2RY2|SERPINF1|PTGS2|RYR1|STAT1|WNT10B|PADI2|TRERF1|NOD2|GPBAR1	-3	RNA_Keller_B-cells-CD21pos_infection_Up
GO Biological Processes	19	GO:0051046	regulation of secretion	19_GO:0051179 localization	-4.8	3.2	5.3	30182	631	269	18	6.7	1.5	1636|2242|2268|2696|2867|3134|3162|3767|4041|5027|5029|6659|7133|7273|8291|10312|23208|192683	ACE|FES|FGR|GIPR|FFAR2|HLA-F|HMOX1|KCNJ11|LRP5|P2RX7|P2RY2|SOX4|TNFRSF1B|TTN|DYSF|TCIRG1|SYT11|SCAMP5	-3	RNA_Keller_B-cells-CD21pos_infection_Up
GO Biological Processes	19	GO:0010935	regulation of macrophage cytokine production	19_GO:0002376 immune system process	-4.7	15	8.2	30182	37	269	5	1.9	0.82	54|5027|8482|10417|64127	ACP5|P2RX7|SEMA7A|SPON2|NOD2	-3	RNA_Keller_B-cells-CD21pos_infection_Up
GO Biological Processes	19	GO:0051960	regulation of nervous system development	19_GO:0032502 developmental process	-4.7	3.7	5.4	30182	461	269	15	5.6	1.4	1636|1742|1890|2049|2247|3280|3687|4135|5176|7133|8482|9231|10154|23654|65078	ACE|DLG4|TYMP|EPHB3|FGF2|HES1|ITGAX|MAP6|SERPINF1|TNFRSF1B|SEMA7A|DLG5|PLXNC1|PLXNB2|RTN4R	-3	RNA_Keller_B-cells-CD21pos_infection_Up
GO Biological Processes	19	GO:0031346	positive regulation of cell projection organization	19_GO:0048518 positive regulation of biological process	-4.7	4.1	5.6	30182	353	269	13	4.8	1.3	1742|2242|4058|4135|5027|5064|5176|5997|8321|8482|10154|23654|64787	DLG4|FES|LTK|MAP6|P2RX7|PALM|SERPINF1|RGS2|FZD1|SEMA7A|PLXNC1|PLXNB2|EPS8L2	-2.9	RNA_Keller_B-cells-CD21pos_infection_Up
GO Biological Processes	19	GO:0140352	export from cell	19_GO:0051179 localization	-4.7	3.6	5.4	30182	462	269	15	5.6	1.4	379|1174|3055|3753|5002|5027|5125|5743|7127|8676|9143|10125|23208|55244|192683	ARL4D|AP1S1|HCK|KCNE1|SLC22A18|P2RX7|PCSK5|PTGS2|TNFAIP2|STX11|SYNGR3|RASGRP1|SYT11|SLC47A1|SCAMP5	-2.9	RNA_Keller_B-cells-CD21pos_infection_Up
GO Biological Processes	19	GO:0040011	locomotion	19_GO:0040011 locomotion	-4.7	3.5	5.3	30182	520	269	16	5.9	1.4	1890|2049|2242|2247|2621|2833|2867|3958|5795|8482|10154|23654|54210|91653|120425|348110	TYMP|EPHB3|FES|FGF2|GAS6|CXCR3|FFAR2|LGALS3|PTPRJ|SEMA7A|PLXNC1|PLXNB2|TREM1|BOC|JAML|ARPIN	-2.9	RNA_Keller_B-cells-CD21pos_infection_Up
GO Biological Processes	19	GO:0046683	response to organophosphorus	19_GO:0050896 response to stimulus	-4.7	7	6.4	30182	129	269	8	3	1	366|3753|3767|5027|5029|5743|6772|7480	AQP9|KCNE1|KCNJ11|P2RX7|P2RY2|PTGS2|STAT1|WNT10B	-2.9	RNA_Keller_B-cells-CD21pos_infection_Up
GO Biological Processes	19	GO:0007420	brain development	19_GO:0032502 developmental process	-4.6	2.9	5.1	30182	777	269	20	7.4	1.6	199|347|1636|1742|2049|2247|3280|3340|3753|5455|5997|8321|8482|8704|9143|9231|9289|11240|23654|65078	AIF1|APOD|ACE|DLG4|EPHB3|FGF2|HES1|NDST1|KCNE1|POU3F3|RGS2|FZD1|SEMA7A|B4GALT2|SYNGR3|DLG5|ADGRG1|PADI2|PLXNB2|RTN4R	-2.9	RNA_Keller_B-cells-CD21pos_infection_Up
GO Biological Processes	19	GO:0002577	regulation of antigen processing and presentation	19_GO:0002376 immune system process	-4.6	22	9.1	30182	20	269	4	1.5	0.74	6556|10288|10875|64127	SLC11A1|LILRB2|FGL2|NOD2	-2.8	RNA_Keller_B-cells-CD21pos_infection_Up
GO Biological Processes	19	GO:0006672	ceramide metabolic process	19_GO:0008152 metabolic process	-4.6	8.1	6.6	30182	97	269	7	2.6	0.97	20|2055|2529|5027|8613|8869|94103	ABCA2|CLN8|FUT7|P2RX7|PLPP3|ST3GAL5|ORMDL3	-2.8	RNA_Keller_B-cells-CD21pos_infection_Up
GO Biological Processes	19	GO:0070663	regulation of leukocyte proliferation	19_GO:0050789 regulation of biological process	-4.5	4.6	5.6	30182	268	269	11	4.1	1.2	199|868|1026|3280|3958|7133|7940|9231|10148|10288|23495	AIF1|CBLB|CDKN1A|HES1|LGALS3|TNFRSF1B|LST1|DLG5|EBI3|LILRB2|TNFRSF13B	-2.8	RNA_Keller_B-cells-CD21pos_infection_Up
GO Biological Processes	19	GO:0002221	pattern recognition receptor signaling pathway	19_GO:0044419 biological process involved in interspecies interaction between organisms	-4.5	7.9	6.5	30182	100	269	7	2.6	0.97	2867|4210|4938|4940|64127|78989|146722	FFAR2|MEFV|OAS1|OAS3|NOD2|COLEC11|CD300LF	-2.8	RNA_Keller_B-cells-CD21pos_infection_Up
GO Biological Processes	19	GO:0071637	regulation of monocyte chemotactic protein-1 production	19_GO:0032501 multicellular organismal process	-4.5	21	8.9	30182	21	269	4	1.5	0.74	347|4938|4940|64127	APOD|OAS1|OAS3|NOD2	-2.8	RNA_Keller_B-cells-CD21pos_infection_Up
GO Biological Processes	19	GO:0033674	positive regulation of kinase activity	19_GO:0048518 positive regulation of biological process	-4.5	3.7	5.3	30182	428	269	14	5.2	1.4	1026|1636|1742|2247|2268|2621|4058|5027|6556|7786|10125|10519|64127|146850	CDKN1A|ACE|DLG4|FGF2|FGR|GAS6|LTK|P2RX7|SLC11A1|MAP3K12|RASGRP1|CIB1|NOD2|PIK3R6	-2.7	RNA_Keller_B-cells-CD21pos_infection_Up
GO Biological Processes	19	GO:0042098	T cell proliferation	19_GO:0002376 immune system process	-4.4	9.8	6.9	30182	69	269	6	2.2	0.9	868|3280|5027|6556|10125|10148	CBLB|HES1|P2RX7|SLC11A1|RASGRP1|EBI3	-2.7	RNA_Keller_B-cells-CD21pos_infection_Up
GO Biological Processes	19	GO:1903039	positive regulation of leukocyte cell-cell adhesion	19_GO:0048518 positive regulation of biological process	-4.4	4.5	5.5	30182	273	269	11	4.1	1.2	199|2529|3280|6659|7480|7525|10125|10148|10288|64127|146850	AIF1|FUT7|HES1|SOX4|WNT10B|YES1|RASGRP1|EBI3|LILRB2|NOD2|PIK3R6	-2.7	RNA_Keller_B-cells-CD21pos_infection_Up
GO Biological Processes	19	GO:0032825	positive regulation of natural killer cell differentiation	19_GO:0002376 immune system process	-4.4	42	11	30182	8	269	3	1.1	0.64	2621|3601|10125	GAS6|IL15RA|RASGRP1	-2.7	RNA_Keller_B-cells-CD21pos_infection_Up
GO Biological Processes	19	GO:0050731	positive regulation of peptidyl-tyrosine phosphorylation	19_GO:0048518 positive regulation of biological process	-4.4	5.6	5.9	30182	181	269	9	3.3	1.1	1636|1742|2621|3280|5795|7525|8613|64127|83666	ACE|DLG4|GAS6|HES1|PTPRJ|YES1|PLPP3|NOD2|PARP9	-2.7	RNA_Keller_B-cells-CD21pos_infection_Up
GO Biological Processes	19	GO:0032722	positive regulation of chemokine production	19_GO:0048518 positive regulation of biological process	-4.4	9.6	6.8	30182	70	269	6	2.2	0.9	199|2867|3162|4938|4940|64127	AIF1|FFAR2|HMOX1|OAS1|OAS3|NOD2	-2.7	RNA_Keller_B-cells-CD21pos_infection_Up
GO Biological Processes	19	GO:0071346	cellular response to type II interferon	19_GO:0044419 biological process involved in interspecies interaction between organisms	-4.4	7.6	6.4	30182	103	269	7	2.6	0.97	199|2633|2634|3055|6772|115361|115362	AIF1|GBP1|GBP2|HCK|STAT1|GBP4|GBP5	-2.7	RNA_Keller_B-cells-CD21pos_infection_Up
GO Biological Processes	19	GO:0032814	regulation of natural killer cell activation	19_GO:0002376 immune system process	-4.4	13	7.5	30182	43	269	5	1.9	0.82	2268|2621|3134|3601|10125	FGR|GAS6|HLA-F|IL15RA|RASGRP1	-2.7	RNA_Keller_B-cells-CD21pos_infection_Up
GO Biological Processes	19	GO:0043068	positive regulation of programmed cell death	19_GO:0048518 positive regulation of biological process	-4.4	3.2	5.1	30182	553	269	16	5.9	1.4	355|1026|1636|1848|3162|4055|4058|5027|5743|6659|7133|7480|23604|27113|150094|440823	FAS|CDKN1A|ACE|DUSP6|HMOX1|LTBR|LTK|P2RX7|PTGS2|SOX4|TNFRSF1B|WNT10B|DAPK2|BBC3|SIK1|MIAT	-2.7	RNA_Keller_B-cells-CD21pos_infection_Up
GO Biological Processes	19	GO:0050856	regulation of T cell receptor signaling pathway	19_GO:0002376 immune system process	-4.4	13	7.4	30182	44	269	5	1.9	0.82	868|2633|3958|5795|50852	CBLB|GBP1|LGALS3|PTPRJ|TRAT1	-2.7	RNA_Keller_B-cells-CD21pos_infection_Up
GO Biological Processes	19	GO:0045936	negative regulation of phosphate metabolic process	19_GO:0048519 negative regulation of biological process	-4.3	3.6	5.2	30182	439	269	14	5.2	1.4	20|868|1026|1031|1848|3958|4041|5795|5997|7453|8613|9021|9961|10519	ABCA2|CBLB|CDKN1A|CDKN2C|DUSP6|LGALS3|LRP5|PTPRJ|RGS2|WARS1|PLPP3|SOCS3|MVP|CIB1	-2.7	RNA_Keller_B-cells-CD21pos_infection_Up
GO Biological Processes	19	GO:0032496	response to lipopolysaccharide	19_GO:0044419 biological process involved in interspecies interaction between organisms	-4.3	4.1	5.3	30182	330	269	12	4.5	1.3	54|1636|3055|3587|5027|5743|6556|7133|10225|10288|10417|64127	ACP5|ACE|HCK|IL10RA|P2RX7|PTGS2|SLC11A1|TNFRSF1B|CD96|LILRB2|SPON2|NOD2	-2.7	RNA_Keller_B-cells-CD21pos_infection_Up
GO Biological Processes	19	GO:0010563	negative regulation of phosphorus metabolic process	19_GO:0048519 negative regulation of biological process	-4.3	3.6	5.1	30182	440	269	14	5.2	1.4	20|868|1026|1031|1848|3958|4041|5795|5997|7453|8613|9021|9961|10519	ABCA2|CBLB|CDKN1A|CDKN2C|DUSP6|LGALS3|LRP5|PTPRJ|RGS2|WARS1|PLPP3|SOCS3|MVP|CIB1	-2.6	RNA_Keller_B-cells-CD21pos_infection_Up
KEGG Pathway	24	hsa05165	Human papillomavirus infection		-4.3	4.1	5.3	30182	331	269	12	4.5	1.3	355|1026|1299|3107|3134|3280|5743|6772|7480|8321|9586|10312	FAS|CDKN1A|COL9A3|HLA-C|HLA-F|HES1|PTGS2|STAT1|WNT10B|FZD1|CREB5|TCIRG1	-2.6	RNA_Keller_B-cells-CD21pos_infection_Up
GO Biological Processes	19	GO:0070661	leukocyte proliferation	19_GO:0009987 cellular process	-4.3	6.2	6	30182	144	269	8	3	1	868|1636|3280|5027|6556|10125|10148|10312	CBLB|ACE|HES1|P2RX7|SLC11A1|RASGRP1|EBI3|TCIRG1	-2.6	RNA_Keller_B-cells-CD21pos_infection_Up
GO Biological Processes	19	GO:0046467	membrane lipid biosynthetic process	19_GO:0008152 metabolic process	-4.3	6.2	6	30182	144	269	8	3	1	20|2055|5027|8613|8869|81537|94103|124976	ABCA2|CLN8|P2RX7|PLPP3|ST3GAL5|SGPP1|ORMDL3|SPNS2	-2.6	RNA_Keller_B-cells-CD21pos_infection_Up
Reactome Gene Sets	6	R-HSA-109582	Hemostasis		-4.3	3.1	4.9	30182	621	269	17	6.3	1.5	1675|2268|2621|2784|3687|3959|5027|5265|5345|7273|7525|9672|10125|54210|84617|120425|146850	CFD|FGR|GAS6|GNB3|ITGAX|LGALS3BP|P2RX7|SERPINA1|SERPINF2|TTN|YES1|SDC3|RASGRP1|TREM1|TUBB6|JAML|PIK3R6	-2.6	RNA_Keller_B-cells-CD21pos_infection_Up
GO Biological Processes	19	GO:0050769	positive regulation of neurogenesis	19_GO:0032502 developmental process	-4.3	4.8	5.6	30182	232	269	10	3.7	1.2	1636|1742|2247|3280|4135|5176|7133|8482|10154|23654	ACE|DLG4|FGF2|HES1|MAP6|SERPINF1|TNFRSF1B|SEMA7A|PLXNC1|PLXNB2	-2.6	RNA_Keller_B-cells-CD21pos_infection_Up
GO Biological Processes	19	GO:0006935	chemotaxis	19_GO:0040011 locomotion	-4.3	3.4	5.1	30182	500	269	15	5.6	1.4	1890|2049|2242|2247|2621|2833|2867|3958|5795|8482|10154|23654|54210|91653|120425	TYMP|EPHB3|FES|FGF2|GAS6|CXCR3|FFAR2|LGALS3|PTPRJ|SEMA7A|PLXNC1|PLXNB2|TREM1|BOC|JAML	-2.6	RNA_Keller_B-cells-CD21pos_infection_Up
GO Biological Processes	19	GO:0008217	regulation of blood pressure	19_GO:0032501 multicellular organismal process	-4.3	5.4	5.7	30182	187	269	9	3.3	1.1	1636|2621|2784|3162|4041|5125|5345|5743|5973	ACE|GAS6|GNB3|HMOX1|LRP5|PCSK5|SERPINF2|PTGS2|RENBP	-2.6	RNA_Keller_B-cells-CD21pos_infection_Up
GO Biological Processes	19	GO:0009611	response to wounding	19_GO:0050896 response to stimulus	-4.3	3.5	5.1	30182	443	269	14	5.2	1.4	199|347|667|1026|2247|2621|2696|3162|5265|6556|8613|23208|116844|120425	AIF1|APOD|DST|CDKN1A|FGF2|GAS6|GIPR|HMOX1|SERPINA1|SLC11A1|PLPP3|SYT11|LRG1|JAML	-2.6	RNA_Keller_B-cells-CD21pos_infection_Up
GO Biological Processes	19	GO:0042330	taxis	19_GO:0040011 locomotion	-4.3	3.4	5	30182	502	269	15	5.6	1.4	1890|2049|2242|2247|2621|2833|2867|3958|5795|8482|10154|23654|54210|91653|120425	TYMP|EPHB3|FES|FGF2|GAS6|CXCR3|FFAR2|LGALS3|PTPRJ|SEMA7A|PLXNC1|PLXNB2|TREM1|BOC|JAML	-2.6	RNA_Keller_B-cells-CD21pos_infection_Up
GO Biological Processes	19	GO:0031400	negative regulation of protein modification process	19_GO:0048519 negative regulation of biological process	-4.3	3.3	5	30182	503	269	15	5.6	1.4	868|1026|1031|1848|3958|4041|5795|5997|6659|7453|8613|9021|9961|10129|10519	CBLB|CDKN1A|CDKN2C|DUSP6|LGALS3|LRP5|PTPRJ|RGS2|SOX4|WARS1|PLPP3|SOCS3|MVP|FRY|CIB1	-2.6	RNA_Keller_B-cells-CD21pos_infection_Up
GO Biological Processes	19	GO:0045598	regulation of fat cell differentiation	19_GO:0032502 developmental process	-4.3	6.1	5.9	30182	146	269	8	3	1	2784|3280|4041|5743|7041|7480|252995|284207	GNB3|HES1|LRP5|PTGS2|TGFB1I1|WNT10B|FNDC5|METRNL	-2.6	RNA_Keller_B-cells-CD21pos_infection_Up
GO Biological Processes	19	GO:0002218	activation of innate immune response	19_GO:0044419 biological process involved in interspecies interaction between organisms	-4.3	6.1	5.9	30182	147	269	8	3	1	2867|3055|4210|4938|4940|64127|78989|146722	FFAR2|HCK|MEFV|OAS1|OAS3|NOD2|COLEC11|CD300LF	-2.6	RNA_Keller_B-cells-CD21pos_infection_Up
GO Biological Processes	19	GO:0002822	regulation of adaptive immune response based on somatic recombination of immune receptors built from immunoglobulin superfamily domains	19_GO:0002376 immune system process	-4.3	5.3	5.7	30182	190	269	9	3.3	1.1	911|2529|3107|3134|5027|6556|7133|30009|64127	CD1C|FUT7|HLA-C|HLA-F|P2RX7|SLC11A1|TNFRSF1B|TBX21|NOD2	-2.6	RNA_Keller_B-cells-CD21pos_infection_Up
GO Biological Processes	19	GO:0060907	positive regulation of macrophage cytokine production	19_GO:0002376 immune system process	-4.2	19	8.2	30182	24	269	4	1.5	0.74	5027|8482|10417|64127	P2RX7|SEMA7A|SPON2|NOD2	-2.6	RNA_Keller_B-cells-CD21pos_infection_Up
GO Biological Processes	19	GO:0002861	regulation of inflammatory response to antigenic stimulus	19_GO:0002376 immune system process	-4.2	12	7.1	30182	47	269	5	1.9	0.82	2268|2529|3055|7525|64127	FGR|FUT7|HCK|YES1|NOD2	-2.6	RNA_Keller_B-cells-CD21pos_infection_Up
GO Biological Processes	19	GO:0001933	negative regulation of protein phosphorylation	19_GO:0048519 negative regulation of biological process	-4.2	3.9	5.2	30182	341	269	12	4.5	1.3	868|1026|1031|1848|4041|5795|5997|7453|8613|9021|9961|10519	CBLB|CDKN1A|CDKN2C|DUSP6|LRP5|PTPRJ|RGS2|WARS1|PLPP3|SOCS3|MVP|CIB1	-2.6	RNA_Keller_B-cells-CD21pos_infection_Up
GO Biological Processes	19	GO:1903530	regulation of secretion by cell	19_GO:0051179 localization	-4.2	3.1	4.9	30182	572	269	16	5.9	1.4	2242|2268|2696|2867|3134|3162|3767|4041|5027|6659|7133|7273|8291|10312|23208|192683	FES|FGR|GIPR|FFAR2|HLA-F|HMOX1|KCNJ11|LRP5|P2RX7|SOX4|TNFRSF1B|TTN|DYSF|TCIRG1|SYT11|SCAMP5	-2.6	RNA_Keller_B-cells-CD21pos_infection_Up
GO Biological Processes	19	GO:0050860	negative regulation of T cell receptor signaling pathway	19_GO:0002376 immune system process	-4.2	18	8	30182	25	269	4	1.5	0.74	868|2633|3958|5795	CBLB|GBP1|LGALS3|PTPRJ	-2.5	RNA_Keller_B-cells-CD21pos_infection_Up
KEGG Pathway	24	hsa04668	TNF signaling pathway		-4.2	7	6	30182	112	269	7	2.6	0.97	355|843|5743|7133|9021|9586|64127	FAS|CASP10|PTGS2|TNFRSF1B|SOCS3|CREB5|NOD2	-2.5	RNA_Keller_B-cells-CD21pos_infection_Up
Canonical Pathways	11	M141	PID PI3KCI PATHWAY		-4.2	12	7	30182	48	269	5	1.9	0.82	2268|3055|7525|11033|146850	FGR|HCK|YES1|ADAP1|PIK3R6	-2.5	RNA_Keller_B-cells-CD21pos_infection_Up
GO Biological Processes	19	GO:0050900	leukocyte migration	19_GO:0002376 immune system process	-4.1	4.6	5.4	30182	244	269	10	3.7	1.2	2529|2621|2867|3055|3958|7525|30009|54210|120425|124976	FUT7|GAS6|FFAR2|HCK|LGALS3|YES1|TBX21|TREM1|JAML|SPNS2	-2.5	RNA_Keller_B-cells-CD21pos_infection_Up
GO Biological Processes	19	GO:0032816	positive regulation of natural killer cell activation	19_GO:0002376 immune system process	-4.1	17	7.9	30182	26	269	4	1.5	0.74	2621|3134|3601|10125	GAS6|HLA-F|IL15RA|RASGRP1	-2.5	RNA_Keller_B-cells-CD21pos_infection_Up
GO Biological Processes	19	GO:0002237	response to molecule of bacterial origin	19_GO:0044419 biological process involved in interspecies interaction between organisms	-4.1	3.8	5.1	30182	351	269	12	4.5	1.3	54|1636|3055|3587|5027|5743|6556|7133|10225|10288|10417|64127	ACP5|ACE|HCK|IL10RA|P2RX7|PTGS2|SLC11A1|TNFRSF1B|CD96|LILRB2|SPON2|NOD2	-2.5	RNA_Keller_B-cells-CD21pos_infection_Up
GO Biological Processes	19	GO:0050870	positive regulation of T cell activation	19_GO:0002376 immune system process	-4.1	4.5	5.3	30182	249	269	10	3.7	1.2	199|3280|6659|7480|7525|10125|10148|10288|64127|146850	AIF1|HES1|SOX4|WNT10B|YES1|RASGRP1|EBI3|LILRB2|NOD2|PIK3R6	-2.4	RNA_Keller_B-cells-CD21pos_infection_Up
GO Biological Processes	19	GO:0006909	phagocytosis	19_GO:0051179 localization	-4	5.7	5.6	30182	158	269	8	3	1	199|2268|2621|3055|5027|6556|7525|64127	AIF1|FGR|GAS6|HCK|P2RX7|SLC11A1|YES1|NOD2	-2.4	RNA_Keller_B-cells-CD21pos_infection_Up
GO Biological Processes	19	GO:0032682	negative regulation of chemokine production	19_GO:0048519 negative regulation of biological process	-4	17	7.7	30182	27	269	4	1.5	0.74	347|4210|4938|4940	APOD|MEFV|OAS1|OAS3	-2.4	RNA_Keller_B-cells-CD21pos_infection_Up
Canonical Pathways	11	M33	PID GLYPICAN 1PATHWAY		-4	17	7.7	30182	27	269	4	1.5	0.74	2247|2268|3055|7525	FGF2|FGR|HCK|YES1	-2.4	RNA_Keller_B-cells-CD21pos_infection_Up
GO Biological Processes	19	GO:0006643	membrane lipid metabolic process	19_GO:0008152 metabolic process	-4	5	5.4	30182	203	269	9	3.3	1.1	20|2055|2529|5027|8613|8869|81537|94103|124976	ABCA2|CLN8|FUT7|P2RX7|PLPP3|ST3GAL5|SGPP1|ORMDL3|SPNS2	-2.4	RNA_Keller_B-cells-CD21pos_infection_Up
KEGG Pathway	24	hsa05200	Pathways in cancer		-4	3.2	4.8	30182	531	269	15	5.6	1.4	355|1026|2247|2784|3162|3280|3601|4041|5743|6772|7480|8321|10125|23604|27113	FAS|CDKN1A|FGF2|GNB3|HMOX1|HES1|IL15RA|LRP5|PTGS2|STAT1|WNT10B|FZD1|RASGRP1|DAPK2|BBC3	-2.4	RNA_Keller_B-cells-CD21pos_infection_Up
GO Biological Processes	19	GO:0018108	peptidyl-tyrosine phosphorylation	19_GO:0008152 metabolic process	-4	5.6	5.6	30182	159	269	8	3	1	2049|2242|2268|3055|4058|7273|7525|64127	EPHB3|FES|FGR|HCK|LTK|TTN|YES1|NOD2	-2.4	RNA_Keller_B-cells-CD21pos_infection_Up
Canonical Pathways	11	M50	PID PTP1B PATHWAY		-4	11	6.7	30182	52	269	5	1.9	0.82	2212|2268|3055|7525|9021	FCGR2A|FGR|HCK|YES1|SOCS3	-2.4	RNA_Keller_B-cells-CD21pos_infection_Up
GO Biological Processes	19	GO:0002819	regulation of adaptive immune response	19_GO:0002376 immune system process	-4	4.9	5.3	30182	205	269	9	3.3	1.1	911|2529|3107|3134|5027|6556|7133|30009|64127	CD1C|FUT7|HLA-C|HLA-F|P2RX7|SLC11A1|TNFRSF1B|TBX21|NOD2	-2.4	RNA_Keller_B-cells-CD21pos_infection_Up
GO Biological Processes	19	GO:0007169	transmembrane receptor protein tyrosine kinase signaling pathway	19_GO:0023052 signaling	-4	3.5	4.9	30182	416	269	13	4.8	1.3	925|2049|2247|2268|3055|3340|4058|5795|7525|8412|9961|50852|79930	CD8A|EPHB3|FGF2|FGR|HCK|NDST1|LTK|PTPRJ|YES1|BCAR3|MVP|TRAT1|DOK3	-2.4	RNA_Keller_B-cells-CD21pos_infection_Up
GO Biological Processes	19	GO:0018212	peptidyl-tyrosine modification	19_GO:0008152 metabolic process	-4	5.6	5.5	30182	161	269	8	3	1	2049|2242|2268|3055|4058|7273|7525|64127	EPHB3|FES|FGR|HCK|LTK|TTN|YES1|NOD2	-2.4	RNA_Keller_B-cells-CD21pos_infection_Up
GO Biological Processes	19	GO:0043065	positive regulation of apoptotic process	19_GO:0048518 positive regulation of biological process	-4	3.1	4.7	30182	536	269	15	5.6	1.4	355|1636|1848|3162|4055|4058|5027|5743|6659|7133|7480|23604|27113|150094|440823	FAS|ACE|DUSP6|HMOX1|LTBR|LTK|P2RX7|PTGS2|SOX4|TNFRSF1B|WNT10B|DAPK2|BBC3|SIK1|MIAT	-2.4	RNA_Keller_B-cells-CD21pos_infection_Up
GO Biological Processes	19	GO:0002604	regulation of dendritic cell antigen processing and presentation	19_GO:0002376 immune system process	-4	31	9.3	30182	11	269	3	1.1	0.64	6556|10875|64127	SLC11A1|FGL2|NOD2	-2.4	RNA_Keller_B-cells-CD21pos_infection_Up
GO Biological Processes	19	GO:0009615	response to virus	19_GO:0044419 biological process involved in interspecies interaction between organisms	-3.9	3.7	4.9	30182	363	269	12	4.5	1.3	1174|2268|2633|3687|4343|4938|4940|6772|10417|30009|83666|84166	AP1S1|FGR|GBP1|ITGAX|MOV10|OAS1|OAS3|STAT1|SPON2|TBX21|PARP9|NLRC5	-2.4	RNA_Keller_B-cells-CD21pos_infection_Up
GO Biological Processes	19	GO:0045860	positive regulation of protein kinase activity	19_GO:0048518 positive regulation of biological process	-3.9	3.7	4.9	30182	364	269	12	4.5	1.3	1026|1636|1742|2247|2621|5027|6556|7786|10125|10519|64127|146850	CDKN1A|ACE|DLG4|FGF2|GAS6|P2RX7|SLC11A1|MAP3K12|RASGRP1|CIB1|NOD2|PIK3R6	-2.4	RNA_Keller_B-cells-CD21pos_infection_Up
Reactome Gene Sets	6	R-HSA-9658195	Leishmania infection		-3.9	5.5	5.4	30182	164	269	8	3	1	2212|2268|2784|3055|3162|4210|5027|7525	FCGR2A|FGR|GNB3|HCK|HMOX1|MEFV|P2RX7|YES1	-2.4	RNA_Keller_B-cells-CD21pos_infection_Up
GO Biological Processes	19	GO:0070201	regulation of establishment of protein localization	19_GO:0051179 localization	-3.9	3.1	4.7	30182	542	269	15	5.6	1.4	347|2621|2696|2867|3753|3767|4041|5027|5743|6659|7273|10312|10519|11156|27113	APOD|GAS6|GIPR|FFAR2|KCNE1|KCNJ11|LRP5|P2RX7|PTGS2|SOX4|TTN|TCIRG1|CIB1|PTP4A3|BBC3	-2.3	RNA_Keller_B-cells-CD21pos_infection_Up
GO Biological Processes	19	GO:0002824	positive regulation of adaptive immune response based on somatic recombination of immune receptors built from immunoglobulin superfamily domains	19_GO:0002376 immune system process	-3.9	6.4	5.7	30182	123	269	7	2.6	0.97	911|3107|3134|5027|6556|30009|64127	CD1C|HLA-C|HLA-F|P2RX7|SLC11A1|TBX21|NOD2	-2.3	RNA_Keller_B-cells-CD21pos_infection_Up
GO Biological Processes	19	GO:0007162	negative regulation of cell adhesion	19_GO:0048519 negative regulation of biological process	-3.9	4	5	30182	312	269	11	4.1	1.2	347|868|2633|3958|8751|9231|10154|10288|10875|23654|30009	APOD|CBLB|GBP1|LGALS3|ADAM15|DLG5|PLXNC1|LILRB2|FGL2|PLXNB2|TBX21	-2.3	RNA_Keller_B-cells-CD21pos_infection_Up
GO Biological Processes	19	GO:0052547	regulation of peptidase activity	19_GO:0008152 metabolic process	-3.9	3.4	4.8	30182	424	269	13	4.8	1.3	355|843|1508|2621|4210|5176|5265|5345|5698|5743|5973|27113|221476	FAS|CASP10|CTSB|GAS6|MEFV|SERPINF1|SERPINA1|SERPINF2|PSMB9|PTGS2|RENBP|BBC3|PI16	-2.3	RNA_Keller_B-cells-CD21pos_infection_Up
GO Biological Processes	19	GO:0045619	regulation of lymphocyte differentiation	19_GO:0002376 immune system process	-3.9	4.8	5.2	30182	212	269	9	3.3	1.1	2621|3601|6659|7480|10125|10288|10875|30009|146850	GAS6|IL15RA|SOX4|WNT10B|RASGRP1|LILRB2|FGL2|TBX21|PIK3R6	-2.3	RNA_Keller_B-cells-CD21pos_infection_Up
GO Biological Processes	19	GO:0071900	regulation of protein serine/threonine kinase activity	19_GO:0008152 metabolic process	-3.9	3.6	4.9	30182	369	269	12	4.5	1.3	1026|1031|2247|4041|5027|5795|5997|7786|10125|10519|64127|146850	CDKN1A|CDKN2C|FGF2|LRP5|P2RX7|PTPRJ|RGS2|MAP3K12|RASGRP1|CIB1|NOD2|PIK3R6	-2.3	RNA_Keller_B-cells-CD21pos_infection_Up
GO Biological Processes	19	GO:0002832	negative regulation of response to biotic stimulus	19_GO:0048519 negative regulation of biological process	-3.9	6.3	5.6	30182	125	269	7	2.6	0.97	3134|4938|4940|10225|10875|23547|84166	HLA-F|OAS1|OAS3|CD96|FGL2|LILRA4|NLRC5	-2.3	RNA_Keller_B-cells-CD21pos_infection_Up
GO Biological Processes	19	GO:0070372	regulation of ERK1 and ERK2 cascade	19_GO:0023052 signaling	-3.9	3.9	4.9	30182	315	269	11	4.1	1.2	1848|2247|2621|2633|5345|7786|8482|10125|10519|64127|151306	DUSP6|FGF2|GAS6|GBP1|SERPINF2|MAP3K12|SEMA7A|RASGRP1|CIB1|NOD2|GPBAR1	-2.3	RNA_Keller_B-cells-CD21pos_infection_Up
GO Biological Processes	19	GO:0002752	cell surface pattern recognition receptor signaling pathway	19_GO:0044419 biological process involved in interspecies interaction between organisms	-3.9	15	7.3	30182	30	269	4	1.5	0.74	2867|4938|64127|78989	FFAR2|OAS1|NOD2|COLEC11	-2.3	RNA_Keller_B-cells-CD21pos_infection_Up
Canonical Pathways	11	M76	PID P38 ALPHA BETA PATHWAY		-3.9	15	7.3	30182	30	269	4	1.5	0.74	2268|3055|7525|7786	FGR|HCK|YES1|MAP3K12	-2.3	RNA_Keller_B-cells-CD21pos_infection_Up
GO Biological Processes	19	GO:0002708	positive regulation of lymphocyte mediated immunity	19_GO:0002376 immune system process	-3.8	6.2	5.6	30182	126	269	7	2.6	0.97	911|3107|3134|5027|10125|30009|64127	CD1C|HLA-C|HLA-F|P2RX7|RASGRP1|TBX21|NOD2	-2.3	RNA_Keller_B-cells-CD21pos_infection_Up
GO Biological Processes	19	GO:0032943	mononuclear cell proliferation	19_GO:0009987 cellular process	-3.8	6.2	5.6	30182	126	269	7	2.6	0.97	868|1636|3280|5027|6556|10125|10148	CBLB|ACE|HES1|P2RX7|SLC11A1|RASGRP1|EBI3	-2.3	RNA_Keller_B-cells-CD21pos_infection_Up
GO Biological Processes	19	GO:0045806	negative regulation of endocytosis	19_GO:0051179 localization	-3.8	10	6.4	30182	56	269	5	1.9	0.82	20|1742|3958|23208|192683	ABCA2|DLG4|LGALS3|SYT11|SCAMP5	-2.3	RNA_Keller_B-cells-CD21pos_infection_Up
Canonical Pathways	11	M5885	NABA MATRISOME ASSOCIATED		-3.8	2.7	4.4	30182	751	269	18	6.7	1.5	307|1508|2247|3958|5125|5176|5265|5345|6282|7480|8482|8751|9560|9672|10148|10154|23654|78989	ANXA4|CTSB|FGF2|LGALS3|PCSK5|SERPINF1|SERPINA1|SERPINF2|S100A11|WNT10B|SEMA7A|ADAM15|CCL4L2|SDC3|EBI3|PLXNC1|PLXNB2|COLEC11	-2.3	RNA_Keller_B-cells-CD21pos_infection_Up
GO Biological Processes	19	GO:2000106	regulation of leukocyte apoptotic process	19_GO:0050789 regulation of biological process	-3.8	7.5	5.8	30182	90	269	6	2.2	0.9	2621|3958|5027|64127|94103|440823	GAS6|LGALS3|P2RX7|NOD2|ORMDL3|MIAT	-2.3	RNA_Keller_B-cells-CD21pos_infection_Up
GO Biological Processes	19	GO:0060563	neuroepithelial cell differentiation	19_GO:0032502 developmental process	-3.8	14	7.1	30182	31	269	4	1.5	0.74	2247|3280|6659|9231	FGF2|HES1|SOX4|DLG5	-2.3	RNA_Keller_B-cells-CD21pos_infection_Up
GO Biological Processes	19	GO:0010942	positive regulation of cell death	19_GO:0048518 positive regulation of biological process	-3.8	2.9	4.5	30182	621	269	16	5.9	1.4	355|1026|1636|1848|3162|4055|4058|5027|5743|6659|7133|7480|23604|27113|150094|440823	FAS|CDKN1A|ACE|DUSP6|HMOX1|LTBR|LTK|P2RX7|PTGS2|SOX4|TNFRSF1B|WNT10B|DAPK2|BBC3|SIK1|MIAT	-2.3	RNA_Keller_B-cells-CD21pos_infection_Up
GO Biological Processes	19	GO:0002821	positive regulation of adaptive immune response	19_GO:0002376 immune system process	-3.8	6.1	5.5	30182	129	269	7	2.6	0.97	911|3107|3134|5027|6556|30009|64127	CD1C|HLA-C|HLA-F|P2RX7|SLC11A1|TBX21|NOD2	-2.3	RNA_Keller_B-cells-CD21pos_infection_Up
GO Biological Processes	19	GO:0045621	positive regulation of lymphocyte differentiation	19_GO:0002376 immune system process	-3.8	6	5.5	30182	130	269	7	2.6	0.97	2621|3601|6659|7480|10125|10288|146850	GAS6|IL15RA|SOX4|WNT10B|RASGRP1|LILRB2|PIK3R6	-2.2	RNA_Keller_B-cells-CD21pos_infection_Up
GO Biological Processes	19	GO:0007167	enzyme-linked receptor protein signaling pathway	19_GO:0023052 signaling	-3.8	2.9	4.5	30182	626	269	16	5.9	1.4	925|2049|2247|2268|2621|3055|3280|3340|4058|5795|7041|7525|8412|9961|50852|79930	CD8A|EPHB3|FGF2|FGR|GAS6|HCK|HES1|NDST1|LTK|PTPRJ|TGFB1I1|YES1|BCAR3|MVP|TRAT1|DOK3	-2.2	RNA_Keller_B-cells-CD21pos_infection_Up
GO Biological Processes	19	GO:0002862	negative regulation of inflammatory response to antigenic stimulus	19_GO:0002376 immune system process	-3.7	14	7	30182	32	269	4	1.5	0.74	2268|3055|7525|64127	FGR|HCK|YES1|NOD2	-2.2	RNA_Keller_B-cells-CD21pos_infection_Up
GO Biological Processes	19	GO:0033198	response to ATP	19_GO:0050896 response to stimulus	-3.7	14	7	30182	32	269	4	1.5	0.74	3767|5027|5029|5743	KCNJ11|P2RX7|P2RY2|PTGS2	-2.2	RNA_Keller_B-cells-CD21pos_infection_Up
GO Biological Processes	19	GO:0070374	positive regulation of ERK1 and ERK2 cascade	19_GO:0023052 signaling	-3.7	4.5	5	30182	222	269	9	3.3	1.1	2247|2621|5345|7786|8482|10125|10519|64127|151306	FGF2|GAS6|SERPINF2|MAP3K12|SEMA7A|RASGRP1|CIB1|NOD2|GPBAR1	-2.2	RNA_Keller_B-cells-CD21pos_infection_Up
GO Biological Processes	19	GO:1905475	regulation of protein localization to membrane	19_GO:0051179 localization	-3.7	5.1	5.2	30182	175	269	8	3	1	1742|2633|3753|3958|10519|27113|51225|246329	DLG4|GBP1|KCNE1|LGALS3|CIB1|BBC3|ABI3|STAC3	-2.2	RNA_Keller_B-cells-CD21pos_infection_Up
GO Biological Processes	19	GO:0042326	negative regulation of phosphorylation	19_GO:0048519 negative regulation of biological process	-3.7	3.5	4.7	30182	383	269	12	4.5	1.3	868|1026|1031|1848|4041|5795|5997|7453|8613|9021|9961|10519	CBLB|CDKN1A|CDKN2C|DUSP6|LRP5|PTPRJ|RGS2|WARS1|PLPP3|SOCS3|MVP|CIB1	-2.2	RNA_Keller_B-cells-CD21pos_infection_Up
GO Biological Processes	19	GO:0032823	regulation of natural killer cell differentiation	19_GO:0002376 immune system process	-3.7	26	8.5	30182	13	269	3	1.1	0.64	2621|3601|10125	GAS6|IL15RA|RASGRP1	-2.2	RNA_Keller_B-cells-CD21pos_infection_Up
KEGG Pathway	24	hsa04142	Lysosome		-3.7	6	5.4	30182	132	269	7	2.6	0.97	20|54|1174|1508|2519|6556|10312	ABCA2|ACP5|AP1S1|CTSB|FUCA2|SLC11A1|TCIRG1	-2.2	RNA_Keller_B-cells-CD21pos_infection_Up
GO Biological Processes	19	GO:0048660	regulation of smooth muscle cell proliferation	19_GO:0050789 regulation of biological process	-3.7	5.1	5.2	30182	176	269	8	3	1	199|347|1026|2247|3162|5345|5743|6772	AIF1|APOD|CDKN1A|FGF2|HMOX1|SERPINF2|PTGS2|STAT1	-2.2	RNA_Keller_B-cells-CD21pos_infection_Up
GO Biological Processes	19	GO:0002443	leukocyte mediated immunity	19_GO:0002376 immune system process	-3.7	4.5	5	30182	224	269	9	3.3	1.1	716|925|1636|5027|10125|10312|10417|54210|57823	C1S|CD8A|ACE|P2RX7|RASGRP1|TCIRG1|SPON2|TREM1|SLAMF7	-2.2	RNA_Keller_B-cells-CD21pos_infection_Up
KEGG Pathway	24	hsa05163	Human cytomegalovirus infection		-3.7	4.5	5	30182	225	269	9	3.3	1.1	355|1026|2784|3107|3134|3587|5743|9560|9586	FAS|CDKN1A|GNB3|HLA-C|HLA-F|IL10RA|PTGS2|CCL4L2|CREB5	-2.2	RNA_Keller_B-cells-CD21pos_infection_Up
GO Biological Processes	19	GO:0050858	negative regulation of antigen receptor-mediated signaling pathway	19_GO:0002376 immune system process	-3.7	14	6.9	30182	33	269	4	1.5	0.74	868|2633|3958|5795	CBLB|GBP1|LGALS3|PTPRJ	-2.2	RNA_Keller_B-cells-CD21pos_infection_Up
GO Biological Processes	19	GO:0002702	positive regulation of production of molecular mediator of immune response	19_GO:0002376 immune system process	-3.7	5.9	5.3	30182	134	269	7	2.6	0.97	2867|3134|5027|8482|10417|30009|64127	FFAR2|HLA-F|P2RX7|SEMA7A|SPON2|TBX21|NOD2	-2.2	RNA_Keller_B-cells-CD21pos_infection_Up
GO Biological Processes	19	GO:0042060	wound healing	19_GO:0050896 response to stimulus	-3.7	3.7	4.7	30182	331	269	11	4.1	1.2	667|1026|2247|2621|3162|5265|6556|8613|23208|116844|120425	DST|CDKN1A|FGF2|GAS6|HMOX1|SERPINA1|SLC11A1|PLPP3|SYT11|LRG1|JAML	-2.2	RNA_Keller_B-cells-CD21pos_infection_Up
GO Biological Processes	19	GO:0001910	regulation of leukocyte mediated cytotoxicity	19_GO:0002376 immune system process	-3.7	7.1	5.6	30182	95	269	6	2.2	0.9	911|3107|3134|5027|10125|146850	CD1C|HLA-C|HLA-F|P2RX7|RASGRP1|PIK3R6	-2.2	RNA_Keller_B-cells-CD21pos_infection_Up
KEGG Pathway	24	hsa05152	Tuberculosis		-3.6	5	5.1	30182	180	269	8	3	1	843|2212|3587|3687|6772|9103|10312|64127	CASP10|FCGR2A|IL10RA|ITGAX|STAT1|FCGR2C|TCIRG1|NOD2	-2.2	RNA_Keller_B-cells-CD21pos_infection_Up
Canonical Pathways	11	M177	PID EPHA FWDPATHWAY		-3.6	13	6.7	30182	34	269	4	1.5	0.74	2268|3055|7525|146850	FGR|HCK|YES1|PIK3R6	-2.1	RNA_Keller_B-cells-CD21pos_infection_Up
GO Biological Processes	19	GO:0052548	regulation of endopeptidase activity	19_GO:0008152 metabolic process	-3.6	3.7	4.7	30182	336	269	11	4.1	1.2	355|843|2621|4210|5176|5265|5345|5698|5743|5973|27113	FAS|CASP10|GAS6|MEFV|SERPINF1|SERPINA1|SERPINF2|PSMB9|PTGS2|RENBP|BBC3	-2.1	RNA_Keller_B-cells-CD21pos_infection_Up
GO Biological Processes	19	GO:0046903	secretion	19_GO:0051179 localization	-3.6	3	4.4	30182	516	269	14	5.2	1.4	366|379|1174|1636|3055|5027|5125|5743|7127|8676|9143|10125|23208|192683	AQP9|ARL4D|AP1S1|ACE|HCK|P2RX7|PCSK5|PTGS2|TNFAIP2|STX11|SYNGR3|RASGRP1|SYT11|SCAMP5	-2.1	RNA_Keller_B-cells-CD21pos_infection_Up
GO Biological Processes	19	GO:0008360	regulation of cell shape	19_GO:0032502 developmental process	-3.6	5.7	5.2	30182	138	269	7	2.6	0.97	2242|2268|3055|5064|7940|10154|23654	FES|FGR|HCK|PALM|LST1|PLXNC1|PLXNB2	-2.1	RNA_Keller_B-cells-CD21pos_infection_Up
GO Biological Processes	19	GO:0051223	regulation of protein transport	19_GO:0051179 localization	-3.6	3	4.4	30182	517	269	14	5.2	1.4	347|2621|2696|2867|3753|3767|4041|5027|5743|6659|7273|10312|10519|27113	APOD|GAS6|GIPR|FFAR2|KCNE1|KCNJ11|LRP5|P2RX7|PTGS2|SOX4|TTN|TCIRG1|CIB1|BBC3	-2.1	RNA_Keller_B-cells-CD21pos_infection_Up
GO Biological Processes	19	GO:0042129	regulation of T cell proliferation	19_GO:0002376 immune system process	-3.6	4.9	5	30182	183	269	8	3	1	199|868|3280|3958|7133|9231|10148|10288	AIF1|CBLB|HES1|LGALS3|TNFRSF1B|DLG5|EBI3|LILRB2	-2.1	RNA_Keller_B-cells-CD21pos_infection_Up
GO Biological Processes	19	GO:1902107	positive regulation of leukocyte differentiation	19_GO:0002376 immune system process	-3.6	4.9	5	30182	184	269	8	3	1	2242|2621|3601|6659|7480|10125|10288|146850	FES|GAS6|IL15RA|SOX4|WNT10B|RASGRP1|LILRB2|PIK3R6	-2.1	RNA_Keller_B-cells-CD21pos_infection_Up
GO Biological Processes	19	GO:1903708	positive regulation of hemopoiesis	19_GO:0002376 immune system process	-3.6	4.9	5	30182	184	269	8	3	1	2242|2621|3601|6659|7480|10125|10288|146850	FES|GAS6|IL15RA|SOX4|WNT10B|RASGRP1|LILRB2|PIK3R6	-2.1	RNA_Keller_B-cells-CD21pos_infection_Up
GO Biological Processes	19	GO:0061081	positive regulation of myeloid leukocyte cytokine production involved in immune response	19_GO:0002376 immune system process	-3.6	13	6.6	30182	35	269	4	1.5	0.74	5027|8482|10417|64127	P2RX7|SEMA7A|SPON2|NOD2	-2.1	RNA_Keller_B-cells-CD21pos_infection_Up
GO Biological Processes	19	GO:0090050	positive regulation of cell migration involved in sprouting angiogenesis	19_GO:0040011 locomotion	-3.6	13	6.6	30182	35	269	4	1.5	0.74	2247|3162|5743|10519	FGF2|HMOX1|PTGS2|CIB1	-2.1	RNA_Keller_B-cells-CD21pos_infection_Up
GO Biological Processes	19	GO:0048661	positive regulation of smooth muscle cell proliferation	19_GO:0048518 positive regulation of biological process	-3.6	6.8	5.5	30182	99	269	6	2.2	0.9	199|2247|3162|5345|5743|6772	AIF1|FGF2|HMOX1|SERPINF2|PTGS2|STAT1	-2.1	RNA_Keller_B-cells-CD21pos_infection_Up
GO Biological Processes	19	GO:0051347	positive regulation of transferase activity	19_GO:0065007 biological regulation	-3.6	3	4.4	30182	522	269	14	5.2	1.4	1026|1636|1742|2247|2268|2621|4058|5027|6556|7786|10125|10519|64127|146850	CDKN1A|ACE|DLG4|FGF2|FGR|GAS6|LTK|P2RX7|SLC11A1|MAP3K12|RASGRP1|CIB1|NOD2|PIK3R6	-2.1	RNA_Keller_B-cells-CD21pos_infection_Up
GO Biological Processes	19	GO:0043405	regulation of MAP kinase activity	19_GO:0008152 metabolic process	-3.6	4.8	5	30182	186	269	8	3	1	2247|5027|5795|5997|7786|10125|64127|146850	FGF2|P2RX7|PTPRJ|RGS2|MAP3K12|RASGRP1|NOD2|PIK3R6	-2.1	RNA_Keller_B-cells-CD21pos_infection_Up
GO Biological Processes	19	GO:0032940	secretion by cell	19_GO:0051179 localization	-3.5	3.3	4.5	30182	402	269	12	4.5	1.3	379|1174|3055|5027|5125|5743|7127|8676|9143|10125|23208|192683	ARL4D|AP1S1|HCK|P2RX7|PCSK5|PTGS2|TNFAIP2|STX11|SYNGR3|RASGRP1|SYT11|SCAMP5	-2.1	RNA_Keller_B-cells-CD21pos_infection_Up
GO Biological Processes	19	GO:0050854	regulation of antigen receptor-mediated signaling pathway	19_GO:0002376 immune system process	-3.5	8.6	5.8	30182	65	269	5	1.9	0.82	868|2633|3958|5795|50852	CBLB|GBP1|LGALS3|PTPRJ|TRAT1	-2.1	RNA_Keller_B-cells-CD21pos_infection_Up
GO Biological Processes	19	GO:0002260	lymphocyte homeostasis	19_GO:0042592 homeostatic process	-3.5	8.6	5.8	30182	65	269	5	1.9	0.82	355|5027|10312|23495|124976	FAS|P2RX7|TCIRG1|TNFRSF13B|SPNS2	-2.1	RNA_Keller_B-cells-CD21pos_infection_Up
GO Biological Processes	19	GO:0071639	positive regulation of monocyte chemotactic protein-1 production	19_GO:0048518 positive regulation of biological process	-3.5	22	7.9	30182	15	269	3	1.1	0.64	4938|4940|64127	OAS1|OAS3|NOD2	-2.1	RNA_Keller_B-cells-CD21pos_infection_Up
GO Biological Processes	19	GO:1903826	L-arginine transmembrane transport	19_GO:0051179 localization	-3.5	22	7.9	30182	15	269	3	1.1	0.64	6556|55244|123096	SLC11A1|SLC47A1|SLC25A29	-2.1	RNA_Keller_B-cells-CD21pos_infection_Up
GO Biological Processes	19	GO:0019882	antigen processing and presentation	19_GO:0002376 immune system process	-3.5	6.7	5.4	30182	101	269	6	2.2	0.9	911|925|1636|3107|3134|6556	CD1C|CD8A|ACE|HLA-C|HLA-F|SLC11A1	-2.1	RNA_Keller_B-cells-CD21pos_infection_Up
GO Biological Processes	19	GO:0046777	protein autophosphorylation	19_GO:0008152 metabolic process	-3.5	4.8	4.9	30182	188	269	8	3	1	2049|2242|2268|3055|4058|7786|23604|150094	EPHB3|FES|FGR|HCK|LTK|MAP3K12|DAPK2|SIK1	-2.1	RNA_Keller_B-cells-CD21pos_infection_Up
GO Biological Processes	19	GO:0051090	regulation of DNA-binding transcription factor activity	19_GO:0008152 metabolic process	-3.5	3.1	4.4	30182	465	269	13	4.8	1.3	307|2621|3055|3162|3280|4041|7480|8321|8613|10519|64127|84166|150094	ANXA4|GAS6|HCK|HMOX1|HES1|LRP5|WNT10B|FZD1|PLPP3|CIB1|NOD2|NLRC5|SIK1	-2.1	RNA_Keller_B-cells-CD21pos_infection_Up
GO Biological Processes	19	GO:0001912	positive regulation of leukocyte mediated cytotoxicity	19_GO:0002376 immune system process	-3.5	8.4	5.7	30182	67	269	5	1.9	0.82	911|3107|3134|5027|10125	CD1C|HLA-C|HLA-F|P2RX7|RASGRP1	-2	RNA_Keller_B-cells-CD21pos_infection_Up
GO Biological Processes	19	GO:0030308	negative regulation of cell growth	19_GO:0040007 growth	-3.5	4.7	4.9	30182	191	269	8	3	1	1026|1031|5795|5997|8482|8751|65078|221476	CDKN1A|CDKN2C|PTPRJ|RGS2|SEMA7A|ADAM15|RTN4R|PI16	-2	RNA_Keller_B-cells-CD21pos_infection_Up
GO Biological Processes	19	GO:0001822	kidney development	19_GO:0032502 developmental process	-3.5	3.8	4.6	30182	295	269	10	3.7	1.2	1636|2247|3280|4357|5125|5176|5455|6659|6772|9231	ACE|FGF2|HES1|MPST|PCSK5|SERPINF1|POU3F3|SOX4|STAT1|DLG5	-2	RNA_Keller_B-cells-CD21pos_infection_Up
GO Biological Processes	19	GO:0002704	negative regulation of leukocyte mediated immunity	19_GO:0002376 immune system process	-3.4	8.3	5.7	30182	68	269	5	1.9	0.82	3134|3162|10225|30009|64127	HLA-F|HMOX1|CD96|TBX21|NOD2	-2	RNA_Keller_B-cells-CD21pos_infection_Up
Reactome Gene Sets	6	R-HSA-844456	The NLRP3 inflammasome		-3.4	21	7.6	30182	16	269	3	1.1	0.64	3162|4210|5027	HMOX1|MEFV|P2RX7	-2	RNA_Keller_B-cells-CD21pos_infection_Up
GO Biological Processes	19	GO:0090336	positive regulation of brown fat cell differentiation	19_GO:0032502 developmental process	-3.4	21	7.6	30182	16	269	3	1.1	0.64	5743|252995|284207	PTGS2|FNDC5|METRNL	-2	RNA_Keller_B-cells-CD21pos_infection_Up
GO Biological Processes	19	GO:0032760	positive regulation of tumor necrosis factor production	19_GO:0048518 positive regulation of biological process	-3.4	6.4	5.3	30182	105	269	6	2.2	0.9	4938|4940|5795|10125|10417|64127	OAS1|OAS3|PTPRJ|RASGRP1|SPON2|NOD2	-2	RNA_Keller_B-cells-CD21pos_infection_Up
GO Biological Processes	19	GO:0007584	response to nutrient	19_GO:0050896 response to stimulus	-3.4	5.3	5	30182	148	269	7	2.6	0.97	2242|2621|2696|3162|5743|6772|64127	FES|GAS6|GIPR|HMOX1|PTGS2|STAT1|NOD2	-2	RNA_Keller_B-cells-CD21pos_infection_Up
GO Biological Processes	19	GO:0002705	positive regulation of leukocyte mediated immunity	19_GO:0002376 immune system process	-3.4	5.3	5	30182	148	269	7	2.6	0.97	911|3107|3134|5027|10125|30009|64127	CD1C|HLA-C|HLA-F|P2RX7|RASGRP1|TBX21|NOD2	-2	RNA_Keller_B-cells-CD21pos_infection_Up
GO Biological Processes	19	GO:0002711	positive regulation of T cell mediated immunity	19_GO:0002376 immune system process	-3.4	8.1	5.6	30182	69	269	5	1.9	0.82	911|3107|3134|5027|30009	CD1C|HLA-C|HLA-F|P2RX7|TBX21	-2	RNA_Keller_B-cells-CD21pos_infection_Up
GO Biological Processes	19	GO:1903706	regulation of hemopoiesis	19_GO:0002376 immune system process	-3.4	3.2	4.4	30182	415	269	12	4.5	1.3	2242|2621|3601|6659|6772|7480|10125|10288|10519|10875|30009|146850	FES|GAS6|IL15RA|SOX4|STAT1|WNT10B|RASGRP1|LILRB2|CIB1|FGL2|TBX21|PIK3R6	-2	RNA_Keller_B-cells-CD21pos_infection_Up
GO Biological Processes	19	GO:0007264	small GTPase mediated signal transduction	19_GO:0023052 signaling	-3.4	4.1	4.6	30182	249	269	9	3.3	1.1	199|1026|2247|3162|8412|9289|10125|64787|79930	AIF1|CDKN1A|FGF2|HMOX1|BCAR3|ADGRG1|RASGRP1|EPS8L2|DOK3	-2	RNA_Keller_B-cells-CD21pos_infection_Up
GO Biological Processes	19	GO:0043029	T cell homeostasis	19_GO:0042592 homeostatic process	-3.4	11	6.1	30182	40	269	4	1.5	0.74	355|5027|10312|124976	FAS|P2RX7|TCIRG1|SPNS2	-2	RNA_Keller_B-cells-CD21pos_infection_Up
Reactome Gene Sets	6	R-HSA-9664323	FCGR3A-mediated IL10 synthesis		-3.4	11	6.1	30182	40	269	4	1.5	0.74	2212|2268|3055|7525	FCGR2A|FGR|HCK|YES1	-2	RNA_Keller_B-cells-CD21pos_infection_Up
GO Biological Processes	19	GO:0001916	positive regulation of T cell mediated cytotoxicity	19_GO:0002376 immune system process	-3.4	11	6.1	30182	40	269	4	1.5	0.74	911|3107|3134|5027	CD1C|HLA-C|HLA-F|P2RX7	-2	RNA_Keller_B-cells-CD21pos_infection_Up
GO Biological Processes	19	GO:0072001	renal system development	19_GO:0032502 developmental process	-3.4	3.7	4.5	30182	305	269	10	3.7	1.2	1636|2247|3280|4357|5125|5176|5455|6659|6772|9231	ACE|FGF2|HES1|MPST|PCSK5|SERPINF1|POU3F3|SOX4|STAT1|DLG5	-2	RNA_Keller_B-cells-CD21pos_infection_Up
KEGG Pathway	24	hsa04145	Phagosome		-3.4	5.2	4.9	30182	152	269	7	2.6	0.97	2212|3107|3134|9103|10312|78989|84617	FCGR2A|HLA-C|HLA-F|FCGR2C|TCIRG1|COLEC11|TUBB6	-2	RNA_Keller_B-cells-CD21pos_infection_Up
GO Biological Processes	19	GO:0031099	regeneration	19_GO:0032502 developmental process	-3.4	5.2	4.9	30182	152	269	7	2.6	0.97	347|1026|1636|2621|3162|7480|8751	APOD|CDKN1A|ACE|GAS6|HMOX1|WNT10B|ADAM15	-2	RNA_Keller_B-cells-CD21pos_infection_Up
GO Biological Processes	19	GO:1903557	positive regulation of tumor necrosis factor superfamily cytokine production	19_GO:0048518 positive regulation of biological process	-3.4	6.2	5.1	30182	109	269	6	2.2	0.9	4938|4940|5795|10125|10417|64127	OAS1|OAS3|PTPRJ|RASGRP1|SPON2|NOD2	-2	RNA_Keller_B-cells-CD21pos_infection_Up
GO Biological Processes	19	GO:0050852	T cell receptor signaling pathway	19_GO:0002376 immune system process	-3.4	6.2	5.1	30182	109	269	6	2.2	0.9	868|925|2533|5795|9473|28639	CBLB|CD8A|FYB1|PTPRJ|THEMIS2|TRBC1	-2	RNA_Keller_B-cells-CD21pos_infection_Up
GO Biological Processes	19	GO:0031341	regulation of cell killing	19_GO:0050789 regulation of biological process	-3.3	6.1	5.1	30182	110	269	6	2.2	0.9	911|3107|3134|5027|10125|146850	CD1C|HLA-C|HLA-F|P2RX7|RASGRP1|PIK3R6	-1.9	RNA_Keller_B-cells-CD21pos_infection_Up
GO Biological Processes	19	GO:0051607	defense response to virus	19_GO:0044419 biological process involved in interspecies interaction between organisms	-3.3	4	4.5	30182	253	269	9	3.3	1.1	2633|3687|4343|4938|4940|6772|10417|83666|84166	GBP1|ITGAX|MOV10|OAS1|OAS3|STAT1|SPON2|PARP9|NLRC5	-1.9	RNA_Keller_B-cells-CD21pos_infection_Up
KEGG Pathway	24	hsa05169	Epstein-Barr virus infection		-3.3	4.4	4.7	30182	202	269	8	3	1	355|1026|3107|3134|3280|4938|4940|6772	FAS|CDKN1A|HLA-C|HLA-F|HES1|OAS1|OAS3|STAT1	-1.9	RNA_Keller_B-cells-CD21pos_infection_Up
GO Biological Processes	19	GO:0140546	defense response to symbiont	19_GO:0044419 biological process involved in interspecies interaction between organisms	-3.3	4	4.5	30182	254	269	9	3.3	1.1	2633|3687|4343|4938|4940|6772|10417|83666|84166	GBP1|ITGAX|MOV10|OAS1|OAS3|STAT1|SPON2|PARP9|NLRC5	-1.9	RNA_Keller_B-cells-CD21pos_infection_Up
GO Biological Processes	19	GO:0097191	extrinsic apoptotic signaling pathway	19_GO:0023052 signaling	-3.3	6.1	5.1	30182	111	269	6	2.2	0.9	355|843|5027|7133|10519|81537	FAS|CASP10|P2RX7|TNFRSF1B|CIB1|SGPP1	-1.9	RNA_Keller_B-cells-CD21pos_infection_Up
GO Biological Processes	19	GO:0071674	mononuclear cell migration	19_GO:0002376 immune system process	-3.3	6.1	5.1	30182	111	269	6	2.2	0.9	2529|2621|3958|30009|120425|124976	FUT7|GAS6|LGALS3|TBX21|JAML|SPNS2	-1.9	RNA_Keller_B-cells-CD21pos_infection_Up
GO Biological Processes	19	GO:0040013	negative regulation of locomotion	19_GO:0040011 locomotion	-3.3	3.2	4.2	30182	427	269	12	4.5	1.3	199|347|2247|3162|5176|5795|8482|8751|9231|9289|11240|348110	AIF1|APOD|FGF2|HMOX1|SERPINF1|PTPRJ|SEMA7A|ADAM15|DLG5|ADGRG1|PADI2|ARPIN	-1.9	RNA_Keller_B-cells-CD21pos_infection_Up
GO Biological Processes	19	GO:0010038	response to metal ion	19_GO:0050896 response to stimulus	-3.3	3.4	4.3	30182	367	269	11	4.1	1.2	1742|2696|3162|5027|5176|5743|6261|7273|10312|23208|57699	DLG4|GIPR|HMOX1|P2RX7|SERPINF1|PTGS2|RYR1|TTN|TCIRG1|SYT11|CPNE5	-1.9	RNA_Keller_B-cells-CD21pos_infection_Up
GO Biological Processes	19	GO:0050851	antigen receptor-mediated signaling pathway	19_GO:0002376 immune system process	-3.3	5.1	4.8	30182	155	269	7	2.6	0.97	868|925|2533|3502|5795|9473|28639	CBLB|CD8A|FYB1|IGHG3|PTPRJ|THEMIS2|TRBC1	-1.9	RNA_Keller_B-cells-CD21pos_infection_Up
GO Biological Processes	19	GO:0071318	cellular response to ATP	19_GO:0050896 response to stimulus	-3.3	19	7.1	30182	18	269	3	1.1	0.64	5027|5029|5743	P2RX7|P2RY2|PTGS2	-1.9	RNA_Keller_B-cells-CD21pos_infection_Up
GO Biological Processes	19	GO:0031343	positive regulation of cell killing	19_GO:0048518 positive regulation of biological process	-3.3	7.6	5.4	30182	74	269	5	1.9	0.82	911|3107|3134|5027|10125	CD1C|HLA-C|HLA-F|P2RX7|RASGRP1	-1.9	RNA_Keller_B-cells-CD21pos_infection_Up
GO Biological Processes	19	GO:0097190	apoptotic signaling pathway	19_GO:0023052 signaling	-3.3	3.6	4.4	30182	312	269	10	3.7	1.2	355|843|1026|3090|3162|5027|7133|10519|27113|81537	FAS|CASP10|CDKN1A|HIC1|HMOX1|P2RX7|TNFRSF1B|CIB1|BBC3|SGPP1	-1.9	RNA_Keller_B-cells-CD21pos_infection_Up
GO Biological Processes	19	GO:0019318	hexose metabolic process	19_GO:0008152 metabolic process	-3.3	5	4.8	30182	157	269	7	2.6	0.97	347|2519|2529|3101|3767|4041|4938	APOD|FUCA2|FUT7|HK3|KCNJ11|LRP5|OAS1	-1.9	RNA_Keller_B-cells-CD21pos_infection_Up
GO Biological Processes	19	GO:0007507	heart development	19_GO:0032502 developmental process	-3.2	2.8	4.1	30182	562	269	14	5.2	1.4	1026|1636|2242|2247|3280|3340|5125|6261|6659|7133|7273|8321|8751|150094	CDKN1A|ACE|FES|FGF2|HES1|NDST1|PCSK5|RYR1|SOX4|TNFRSF1B|TTN|FZD1|ADAM15|SIK1	-1.9	RNA_Keller_B-cells-CD21pos_infection_Up
GO Biological Processes	19	GO:0042593	glucose homeostasis	19_GO:0042592 homeostatic process	-3.2	4.3	4.5	30182	208	269	8	3	1	1636|2621|2867|3101|4938|5176|5836|6659	ACE|GAS6|FFAR2|HK3|OAS1|SERPINF1|PYGL|SOX4	-1.9	RNA_Keller_B-cells-CD21pos_infection_Up
GO Biological Processes	19	GO:0030336	negative regulation of cell migration	19_GO:0040011 locomotion	-3.2	3.3	4.2	30182	375	269	11	4.1	1.2	199|347|2247|3162|5176|5795|8751|9231|9289|11240|348110	AIF1|APOD|FGF2|HMOX1|SERPINF1|PTPRJ|ADAM15|DLG5|ADGRG1|PADI2|ARPIN	-1.9	RNA_Keller_B-cells-CD21pos_infection_Up
GO Biological Processes	19	GO:0033500	carbohydrate homeostasis	19_GO:0042592 homeostatic process	-3.2	4.3	4.5	30182	209	269	8	3	1	1636|2621|2867|3101|4938|5176|5836|6659	ACE|GAS6|FFAR2|HK3|OAS1|SERPINF1|PYGL|SOX4	-1.9	RNA_Keller_B-cells-CD21pos_infection_Up
GO Biological Processes	19	GO:1990822	basic amino acid transmembrane transport	19_GO:0051179 localization	-3.2	18	6.9	30182	19	269	3	1.1	0.64	6556|55244|123096	SLC11A1|SLC47A1|SLC25A29	-1.9	RNA_Keller_B-cells-CD21pos_infection_Up
GO Biological Processes	19	GO:0032695	negative regulation of interleukin-12 production	19_GO:0048519 negative regulation of biological process	-3.2	18	6.9	30182	19	269	3	1.1	0.64	54|4210|64127	ACP5|MEFV|NOD2	-1.9	RNA_Keller_B-cells-CD21pos_infection_Up
GO Biological Processes	19	GO:0071496	cellular response to external stimulus	19_GO:0050896 response to stimulus	-3.2	3.5	4.3	30182	318	269	10	3.7	1.2	199|355|1026|2242|2247|2621|3162|4055|5027|5743	AIF1|FAS|CDKN1A|FES|FGF2|GAS6|HMOX1|LTBR|P2RX7|PTGS2	-1.9	RNA_Keller_B-cells-CD21pos_infection_Up
GO Biological Processes	19	GO:0051129	negative regulation of cellular component organization	19_GO:0048519 negative regulation of biological process	-3.2	2.6	4	30182	703	269	16	5.9	1.4	20|347|1636|1742|3280|3958|4210|7133|8482|10288|10519|23208|51225|65078|192683|348110	ABCA2|APOD|ACE|DLG4|HES1|LGALS3|MEFV|TNFRSF1B|SEMA7A|LILRB2|CIB1|SYT11|ABI3|RTN4R|SCAMP5|ARPIN	-1.9	RNA_Keller_B-cells-CD21pos_infection_Up
Reactome Gene Sets	6	R-HSA-76002	Platelet activation, signaling and aggregation		-3.2	3.8	4.4	30182	263	269	9	3.3	1.1	1675|2621|2784|3959|5265|5345|7273|10125|146850	CFD|GAS6|GNB3|LGALS3BP|SERPINA1|SERPINF2|TTN|RASGRP1|PIK3R6	-1.9	RNA_Keller_B-cells-CD21pos_infection_Up
GO Biological Processes	19	GO:1902105	regulation of leukocyte differentiation	19_GO:0002376 immune system process	-3.2	3.5	4.3	30182	319	269	10	3.7	1.2	2242|2621|3601|6659|7480|10125|10288|10875|30009|146850	FES|GAS6|IL15RA|SOX4|WNT10B|RASGRP1|LILRB2|FGL2|TBX21|PIK3R6	-1.9	RNA_Keller_B-cells-CD21pos_infection_Up
Reactome Gene Sets	6	R-HSA-1660661	Sphingolipid de novo biosynthesis		-3.2	10	5.8	30182	44	269	4	1.5	0.74	8613|81537|94103|124976	PLPP3|SGPP1|ORMDL3|SPNS2	-1.9	RNA_Keller_B-cells-CD21pos_infection_Up
GO Biological Processes	19	GO:2000249	regulation of actin cytoskeleton reorganization	19_GO:0050789 regulation of biological process	-3.2	10	5.8	30182	44	269	4	1.5	0.74	2242|3055|51225|90668	FES|HCK|ABI3|CARMIL3	-1.9	RNA_Keller_B-cells-CD21pos_infection_Up
GO Biological Processes	19	GO:0033003	regulation of mast cell activation	19_GO:0002376 immune system process	-3.2	10	5.8	30182	44	269	4	1.5	0.74	2242|2268|3162|146722	FES|FGR|HMOX1|CD300LF	-1.9	RNA_Keller_B-cells-CD21pos_infection_Up
GO Biological Processes	19	GO:0010876	lipid localization	19_GO:0051179 localization	-3.2	3.3	4.2	30182	378	269	11	4.1	1.2	20|347|366|1636|2055|2867|5027|5743|80830|81537|124976	ABCA2|APOD|AQP9|ACE|CLN8|FFAR2|P2RX7|PTGS2|APOL6|SGPP1|SPNS2	-1.9	RNA_Keller_B-cells-CD21pos_infection_Up
GO Biological Processes	19	GO:0044089	positive regulation of cellular component biogenesis	19_GO:0048518 positive regulation of biological process	-3.2	2.9	4.1	30182	503	269	13	4.8	1.3	2049|2242|3055|3958|5027|5064|5345|5795|7453|7480|9231|64787|115362	EPHB3|FES|HCK|LGALS3|P2RX7|PALM|SERPINF2|PTPRJ|WARS1|WNT10B|DLG5|EPS8L2|GBP5	-1.8	RNA_Keller_B-cells-CD21pos_infection_Up
GO Biological Processes	19	GO:0034612	response to tumor necrosis factor	19_GO:0050896 response to stimulus	-3.2	4.3	4.5	30182	211	269	8	3	1	355|2633|2634|3280|5743|6772|7133|10519	FAS|GBP1|GBP2|HES1|PTGS2|STAT1|TNFRSF1B|CIB1	-1.8	RNA_Keller_B-cells-CD21pos_infection_Up
GO Biological Processes	19	GO:0030335	positive regulation of cell migration	19_GO:0040011 locomotion	-3.2	2.8	4	30182	569	269	14	5.2	1.4	199|2247|2268|2529|2621|3162|3687|3958|5743|6282|8482|8613|10519|23604	AIF1|FGF2|FGR|FUT7|GAS6|HMOX1|ITGAX|LGALS3|PTGS2|S100A11|SEMA7A|PLPP3|CIB1|DAPK2	-1.8	RNA_Keller_B-cells-CD21pos_infection_Up
GO Biological Processes	19	GO:0043406	positive regulation of MAP kinase activity	19_GO:0023052 signaling	-3.2	5.8	4.9	30182	117	269	6	2.2	0.9	2247|5027|7786|10125|64127|146850	FGF2|P2RX7|MAP3K12|RASGRP1|NOD2|PIK3R6	-1.8	RNA_Keller_B-cells-CD21pos_infection_Up
GO Biological Processes	19	GO:0003018	vascular process in circulatory system	19_GO:0032501 multicellular organismal process	-3.2	3.8	4.4	30182	265	269	9	3.3	1.1	20|1636|5029|5345|5743|5795|5997|7525|11156	ABCA2|ACE|P2RY2|SERPINF2|PTGS2|PTPRJ|RGS2|YES1|PTP4A3	-1.8	RNA_Keller_B-cells-CD21pos_infection_Up
GO Biological Processes	19	GO:0045824	negative regulation of innate immune response	19_GO:0044419 biological process involved in interspecies interaction between organisms	-3.2	7.2	5.2	30182	78	269	5	1.9	0.82	3134|4938|4940|10225|84166	HLA-F|OAS1|OAS3|CD96|NLRC5	-1.8	RNA_Keller_B-cells-CD21pos_infection_Up
GO Biological Processes	19	GO:0032720	negative regulation of tumor necrosis factor production	19_GO:0048519 negative regulation of biological process	-3.2	7.2	5.2	30182	78	269	5	1.9	0.82	54|2621|23208|23547|64127	ACP5|GAS6|SYT11|LILRA4|NOD2	-1.8	RNA_Keller_B-cells-CD21pos_infection_Up
GO Biological Processes	19	GO:0050767	regulation of neurogenesis	19_GO:0032502 developmental process	-3.2	3.2	4.2	30182	381	269	11	4.1	1.2	1636|1742|2247|3280|4135|5176|7133|8482|10154|23654|65078	ACE|DLG4|FGF2|HES1|MAP6|SERPINF1|TNFRSF1B|SEMA7A|PLXNC1|PLXNB2|RTN4R	-1.8	RNA_Keller_B-cells-CD21pos_infection_Up
GO Biological Processes	19	GO:0050830	defense response to Gram-positive bacterium	19_GO:0044419 biological process involved in interspecies interaction between organisms	-3.2	5.7	4.9	30182	118	269	6	2.2	0.9	54|2268|2634|5027|64127|115361	ACP5|FGR|GBP2|P2RX7|NOD2|GBP4	-1.8	RNA_Keller_B-cells-CD21pos_infection_Up
GO Biological Processes	19	GO:0032649	regulation of type II interferon production	19_GO:0032501 multicellular organismal process	-3.2	5.7	4.9	30182	118	269	6	2.2	0.9	2621|6556|10125|10148|10225|64127	GAS6|SLC11A1|RASGRP1|EBI3|CD96|NOD2	-1.8	RNA_Keller_B-cells-CD21pos_infection_Up
GO Biological Processes	19	GO:0051924	regulation of calcium ion transport	19_GO:0051179 localization	-3.2	3.8	4.3	30182	266	269	9	3.3	1.1	1636|3280|3753|3958|5027|5743|5957|10288|246329	ACE|HES1|KCNE1|LGALS3|P2RX7|PTGS2|RCVRN|LILRB2|STAC3	-1.8	RNA_Keller_B-cells-CD21pos_infection_Up
GO Biological Processes	19	GO:1901888	regulation of cell junction assembly	19_GO:0050789 regulation of biological process	-3.1	4.2	4.4	30182	214	269	8	3	1	347|1636|2049|5795|8321|9231|51225|151306	APOD|ACE|EPHB3|PTPRJ|FZD1|DLG5|ABI3|GPBAR1	-1.8	RNA_Keller_B-cells-CD21pos_infection_Up
GO Biological Processes	19	GO:1903131	mononuclear cell differentiation	19_GO:0032502 developmental process	-3.1	3.5	4.2	30182	324	269	10	3.7	1.2	925|2529|2621|3601|4055|5795|6659|7480|10312|30009	CD8A|FUT7|GAS6|IL15RA|LTBR|PTPRJ|SOX4|WNT10B|TCIRG1|TBX21	-1.8	RNA_Keller_B-cells-CD21pos_infection_Up
GO Biological Processes	19	GO:1904951	positive regulation of establishment of protein localization	19_GO:0051179 localization	-3.1	3.5	4.2	30182	324	269	10	3.7	1.2	2621|2696|2867|5027|5743|6659|7273|10519|11156|27113	GAS6|GIPR|FFAR2|P2RX7|PTGS2|SOX4|TTN|CIB1|PTP4A3|BBC3	-1.8	RNA_Keller_B-cells-CD21pos_infection_Up
GO Biological Processes	19	GO:0060339	negative regulation of type I interferon-mediated signaling pathway	19_GO:0044419 biological process involved in interspecies interaction between organisms	-3.1	17	6.7	30182	20	269	3	1.1	0.64	4938|4940|84166	OAS1|OAS3|NLRC5	-1.8	RNA_Keller_B-cells-CD21pos_infection_Up
GO Biological Processes	19	GO:0006670	sphingosine metabolic process	19_GO:0008152 metabolic process	-3.1	17	6.7	30182	20	269	3	1.1	0.64	20|8613|81537	ABCA2|PLPP3|SGPP1	-1.8	RNA_Keller_B-cells-CD21pos_infection_Up
Reactome Gene Sets	6	R-HSA-9662851	Anti-inflammatory response favouring Leishmania parasite infection		-3.1	7.1	5.1	30182	79	269	5	1.9	0.82	2212|2268|2784|3055|7525	FCGR2A|FGR|GNB3|HCK|YES1	-1.8	RNA_Keller_B-cells-CD21pos_infection_Up
Reactome Gene Sets	6	R-HSA-9664433	Leishmania parasite growth and survival		-3.1	7.1	5.1	30182	79	269	5	1.9	0.82	2212|2268|2784|3055|7525	FCGR2A|FGR|GNB3|HCK|YES1	-1.8	RNA_Keller_B-cells-CD21pos_infection_Up
GO Biological Processes	19	GO:0001959	regulation of cytokine-mediated signaling pathway	19_GO:0023052 signaling	-3.1	4.8	4.6	30182	165	269	7	2.6	0.97	2621|4938|4940|11240|83666|84166|146722	GAS6|OAS1|OAS3|PADI2|PARP9|NLRC5|CD300LF	-1.8	RNA_Keller_B-cells-CD21pos_infection_Up
GO Biological Processes	19	GO:1903556	negative regulation of tumor necrosis factor superfamily cytokine production	19_GO:0048519 negative regulation of biological process	-3.1	7	5.1	30182	80	269	5	1.9	0.82	54|2621|23208|23547|64127	ACP5|GAS6|SYT11|LILRA4|NOD2	-1.8	RNA_Keller_B-cells-CD21pos_infection_Up
Reactome Gene Sets	6	R-HSA-8878166	Transcriptional regulation by RUNX2		-3.1	5.6	4.8	30182	121	269	6	2.2	0.9	1026|3280|3958|5698|6772|7525	CDKN1A|HES1|LGALS3|PSMB9|STAT1|YES1	-1.8	RNA_Keller_B-cells-CD21pos_infection_Up
GO Biological Processes	19	GO:0006469	negative regulation of protein kinase activity	19_GO:0048519 negative regulation of biological process	-3.1	4.1	4.4	30182	217	269	8	3	1	868|1026|1031|4041|5795|5997|7453|9961	CBLB|CDKN1A|CDKN2C|LRP5|PTPRJ|RGS2|WARS1|MVP	-1.8	RNA_Keller_B-cells-CD21pos_infection_Up
GO Biological Processes	19	GO:0071675	regulation of mononuclear cell migration	19_GO:0040011 locomotion	-3.1	5.5	4.7	30182	122	269	6	2.2	0.9	199|347|2621|3958|11240|124976	AIF1|APOD|GAS6|LGALS3|PADI2|SPNS2	-1.8	RNA_Keller_B-cells-CD21pos_infection_Up
GO Biological Processes	19	GO:0046651	lymphocyte proliferation	19_GO:0002376 immune system process	-3.1	5.5	4.7	30182	122	269	6	2.2	0.9	868|3280|5027|6556|10125|10148	CBLB|HES1|P2RX7|SLC11A1|RASGRP1|EBI3	-1.8	RNA_Keller_B-cells-CD21pos_infection_Up
GO Biological Processes	19	GO:2000146	negative regulation of cell motility	19_GO:0040011 locomotion	-3.1	3.2	4.1	30182	390	269	11	4.1	1.2	199|347|2247|3162|5176|5795|8751|9231|9289|11240|348110	AIF1|APOD|FGF2|HMOX1|SERPINF1|PTPRJ|ADAM15|DLG5|ADGRG1|PADI2|ARPIN	-1.8	RNA_Keller_B-cells-CD21pos_infection_Up
GO Biological Processes	19	GO:1901215	negative regulation of neuron death	19_GO:0048519 negative regulation of biological process	-3.1	4.1	4.4	30182	219	269	8	3	1	2055|3134|3162|5176|6620|7133|7786|8321	CLN8|HLA-F|HMOX1|SERPINF1|SNCB|TNFRSF1B|MAP3K12|FZD1	-1.8	RNA_Keller_B-cells-CD21pos_infection_Up
GO Biological Processes	19	GO:0002433	immune response-regulating cell surface receptor signaling pathway involved in phagocytosis	19_GO:0002376 immune system process	-3.1	16	6.5	30182	21	269	3	1.1	0.64	2268|3055|7525	FGR|HCK|YES1	-1.8	RNA_Keller_B-cells-CD21pos_infection_Up
GO Biological Processes	19	GO:0038096	Fc-gamma receptor signaling pathway involved in phagocytosis	19_GO:0002376 immune system process	-3.1	16	6.5	30182	21	269	3	1.1	0.64	2268|3055|7525	FGR|HCK|YES1	-1.8	RNA_Keller_B-cells-CD21pos_infection_Up
Reactome Gene Sets	6	R-HSA-622312	Inflammasomes		-3.1	16	6.5	30182	21	269	3	1.1	0.64	3162|4210|5027	HMOX1|MEFV|P2RX7	-1.8	RNA_Keller_B-cells-CD21pos_infection_Up
GO Biological Processes	19	GO:0050765	negative regulation of phagocytosis	19_GO:0051179 localization	-3.1	16	6.5	30182	21	269	3	1.1	0.64	8291|23208|146722	DYSF|SYT11|CD300LF	-1.8	RNA_Keller_B-cells-CD21pos_infection_Up
GO Biological Processes	19	GO:0019725	cellular homeostasis	19_GO:0042592 homeostatic process	-3.1	2.6	3.9	30182	652	269	15	5.6	1.4	20|1636|2621|2784|3101|3162|5027|5029|5176|6261|6556|6659|10312|83697|94103	ABCA2|ACE|GAS6|GNB3|HK3|HMOX1|P2RX7|P2RY2|SERPINF1|RYR1|SLC11A1|SOX4|TCIRG1|SLC4A9|ORMDL3	-1.8	RNA_Keller_B-cells-CD21pos_infection_Up
GO Biological Processes	19	GO:0061097	regulation of protein tyrosine kinase activity	19_GO:0008152 metabolic process	-3.1	6.8	5	30182	82	269	5	1.9	0.82	868|1636|1742|2621|9961	CBLB|ACE|DLG4|GAS6|MVP	-1.8	RNA_Keller_B-cells-CD21pos_infection_Up
Canonical Pathways	11	M5880	NABA ECM AFFILIATED		-3.1	4.6	4.5	30182	170	269	7	2.6	0.97	307|3958|8482|9672|10154|23654|78989	ANXA4|LGALS3|SEMA7A|SDC3|PLXNC1|PLXNB2|COLEC11	-1.8	RNA_Keller_B-cells-CD21pos_infection_Up
GO Biological Processes	19	GO:0043300	regulation of leukocyte degranulation	19_GO:0002376 immune system process	-3.1	9.4	5.5	30182	48	269	4	1.5	0.74	2242|2268|3134|3162	FES|FGR|HLA-F|HMOX1	-1.8	RNA_Keller_B-cells-CD21pos_infection_Up
GO Biological Processes	19	GO:0030162	regulation of proteolysis	19_GO:0008152 metabolic process	-3.1	2.5	3.8	30182	726	269	16	5.9	1.4	355|843|1508|2055|2621|4210|5176|5265|5345|5698|5743|5973|7133|7480|27113|221476	FAS|CASP10|CTSB|CLN8|GAS6|MEFV|SERPINF1|SERPINA1|SERPINF2|PSMB9|PTGS2|RENBP|TNFRSF1B|WNT10B|BBC3|PI16	-1.8	RNA_Keller_B-cells-CD21pos_infection_Up
GO Biological Processes	19	GO:0006959	humoral immune response	19_GO:0002376 immune system process	-3	4	4.3	30182	222	269	8	3	1	716|1675|6556|10148|10417|54210|64127|78989	C1S|CFD|SLC11A1|EBI3|SPON2|TREM1|NOD2|COLEC11	-1.8	RNA_Keller_B-cells-CD21pos_infection_Up
GO Biological Processes	19	GO:0030097	hemopoiesis	19_GO:0032502 developmental process	-3	2.6	3.8	30182	659	269	15	5.6	1.4	843|925|1636|2529|2621|3217|3601|4055|5795|6659|7480|10312|10519|23495|30009	CASP10|CD8A|ACE|FUT7|GAS6|HOXB7|IL15RA|LTBR|PTPRJ|SOX4|WNT10B|TCIRG1|CIB1|TNFRSF13B|TBX21	-1.8	RNA_Keller_B-cells-CD21pos_infection_Up
GO Biological Processes	19	GO:0001503	ossification	19_GO:0032501 multicellular organismal process	-3	3.6	4.2	30182	278	269	9	3.3	1.1	2247|2268|4041|5743|6261|7480|8321|8482|10312	FGF2|FGR|LRP5|PTGS2|RYR1|WNT10B|FZD1|SEMA7A|TCIRG1	-1.8	RNA_Keller_B-cells-CD21pos_infection_Up
GO Biological Processes	19	GO:0015802	basic amino acid transport	19_GO:0051179 localization	-3	15	6.4	30182	22	269	3	1.1	0.64	6556|55244|123096	SLC11A1|SLC47A1|SLC25A29	-1.8	RNA_Keller_B-cells-CD21pos_infection_Up
GO Biological Processes	19	GO:1900424	regulation of defense response to bacterium	19_GO:0044419 biological process involved in interspecies interaction between organisms	-3	15	6.4	30182	22	269	3	1.1	0.64	23208|64127|440823	SYT11|NOD2|MIAT	-1.8	RNA_Keller_B-cells-CD21pos_infection_Up
GO Biological Processes	19	GO:0003081	regulation of systemic arterial blood pressure by renin-angiotensin	19_GO:0032501 multicellular organismal process	-3	15	6.4	30182	22	269	3	1.1	0.64	1636|5125|5345	ACE|PCSK5|SERPINF2	-1.8	RNA_Keller_B-cells-CD21pos_infection_Up
GO Biological Processes	19	GO:0046519	sphingoid metabolic process	19_GO:0008152 metabolic process	-3	15	6.4	30182	22	269	3	1.1	0.64	20|8613|81537	ABCA2|PLPP3|SGPP1	-1.8	RNA_Keller_B-cells-CD21pos_infection_Up
GO Biological Processes	19	GO:0038093	Fc receptor signaling pathway	19_GO:0002376 immune system process	-3	9.2	5.4	30182	49	269	4	1.5	0.74	2268|3055|7525|23547	FGR|HCK|YES1|LILRA4	-1.8	RNA_Keller_B-cells-CD21pos_infection_Up
GO Biological Processes	19	GO:0051348	negative regulation of transferase activity	19_GO:0065007 biological regulation	-3	3.6	4.2	30182	279	269	9	3.3	1.1	868|1026|1031|4041|5795|5997|7453|9961|94103	CBLB|CDKN1A|CDKN2C|LRP5|PTPRJ|RGS2|WARS1|MVP|ORMDL3	-1.8	RNA_Keller_B-cells-CD21pos_infection_Up
GO Biological Processes	19	GO:2000147	positive regulation of cell motility	19_GO:0040011 locomotion	-3	2.6	3.8	30182	594	269	14	5.2	1.4	199|2247|2268|2529|2621|3162|3687|3958|5743|6282|8482|8613|10519|23604	AIF1|FGF2|FGR|FUT7|GAS6|HMOX1|ITGAX|LGALS3|PTGS2|S100A11|SEMA7A|PLPP3|CIB1|DAPK2	-1.7	RNA_Keller_B-cells-CD21pos_infection_Up
GO Biological Processes	19	GO:0060249	anatomical structure homeostasis	19_GO:0042592 homeostatic process	-3	4	4.3	30182	225	269	8	3	1	54|216|2055|3502|5027|5743|10312|64127	ACP5|ALDH1A1|CLN8|IGHG3|P2RX7|PTGS2|TCIRG1|NOD2	-1.7	RNA_Keller_B-cells-CD21pos_infection_Up
GO Biological Processes	19	GO:0001894	tissue homeostasis	19_GO:0042592 homeostatic process	-3	4	4.3	30182	225	269	8	3	1	54|216|2055|3502|5027|5743|10312|64127	ACP5|ALDH1A1|CLN8|IGHG3|P2RX7|PTGS2|TCIRG1|NOD2	-1.7	RNA_Keller_B-cells-CD21pos_infection_Up
GO Biological Processes	19	GO:0001914	regulation of T cell mediated cytotoxicity	19_GO:0002376 immune system process	-3	9	5.4	30182	50	269	4	1.5	0.74	911|3107|3134|5027	CD1C|HLA-C|HLA-F|P2RX7	-1.7	RNA_Keller_B-cells-CD21pos_infection_Up
GO Biological Processes	19	GO:1904375	regulation of protein localization to cell periphery	19_GO:0051179 localization	-3	5.3	4.6	30182	128	269	6	2.2	0.9	20|2633|3958|10519|51225|246329	ABCA2|GBP1|LGALS3|CIB1|ABI3|STAC3	-1.7	RNA_Keller_B-cells-CD21pos_infection_Up
GO Biological Processes	19	GO:0006869	lipid transport	19_GO:0051179 localization	-3	3.3	4	30182	341	269	10	3.7	1.2	20|347|366|1636|2055|5027|5743|80830|81537|124976	ABCA2|APOD|AQP9|ACE|CLN8|P2RX7|PTGS2|APOL6|SGPP1|SPNS2	-1.7	RNA_Keller_B-cells-CD21pos_infection_Up
KEGG Pathway	24	hsa04610	Complement and coagulation cascades		-3	6.5	4.9	30182	86	269	5	1.9	0.82	716|1675|3687|5265|5345	C1S|CFD|ITGAX|SERPINA1|SERPINF2	-1.7	RNA_Keller_B-cells-CD21pos_infection_Up
GO Biological Processes	19	GO:0005975	carbohydrate metabolic process	19_GO:0008152 metabolic process	-3	2.9	3.9	30182	467	269	12	4.5	1.3	347|2519|2529|3101|3340|3767|4041|4938|5836|5973|8704|8869	APOD|FUCA2|FUT7|HK3|NDST1|KCNJ11|LRP5|OAS1|PYGL|RENBP|B4GALT2|ST3GAL5	-1.7	RNA_Keller_B-cells-CD21pos_infection_Up
Reactome Gene Sets	6	R-HSA-114608	Platelet degranulation		-3	5.2	4.6	30182	129	269	6	2.2	0.9	1675|2621|3959|5265|5345|7273	CFD|GAS6|LGALS3BP|SERPINA1|SERPINF2|TTN	-1.7	RNA_Keller_B-cells-CD21pos_infection_Up
Canonical Pathways	11	M186	PID PDGFRB PATHWAY		-3	5.2	4.6	30182	129	269	6	2.2	0.9	2268|3055|5795|6772|7525|146850	FGR|HCK|PTPRJ|STAT1|YES1|PIK3R6	-1.7	RNA_Keller_B-cells-CD21pos_infection_Up
Reactome Gene Sets	6	R-HSA-166663	Initial triggering of complement		-3	15	6.2	30182	23	269	3	1.1	0.64	716|1675|78989	C1S|CFD|COLEC11	-1.7	RNA_Keller_B-cells-CD21pos_infection_Up
GO Biological Processes	19	GO:0002431	Fc receptor mediated stimulatory signaling pathway	19_GO:0002376 immune system process	-3	15	6.2	30182	23	269	3	1.1	0.64	2268|3055|7525	FGR|HCK|YES1	-1.7	RNA_Keller_B-cells-CD21pos_infection_Up
GO Biological Processes	19	GO:0005996	monosaccharide metabolic process	19_GO:0008152 metabolic process	-3	4.4	4.3	30182	177	269	7	2.6	0.97	347|2519|2529|3101|3767|4041|4938	APOD|FUCA2|FUT7|HK3|KCNJ11|LRP5|OAS1	-1.7	RNA_Keller_B-cells-CD21pos_infection_Up
GO Biological Processes	19	GO:0060759	regulation of response to cytokine stimulus	19_GO:0050896 response to stimulus	-3	4.4	4.3	30182	177	269	7	2.6	0.97	2621|4938|4940|11240|83666|84166|146722	GAS6|OAS1|OAS3|PADI2|PARP9|NLRC5|CD300LF	-1.7	RNA_Keller_B-cells-CD21pos_infection_Up
GO Biological Processes	19	GO:0001960	negative regulation of cytokine-mediated signaling pathway	19_GO:0023052 signaling	-3	6.4	4.8	30182	87	269	5	1.9	0.82	2621|4938|4940|11240|84166	GAS6|OAS1|OAS3|PADI2|NLRC5	-1.7	RNA_Keller_B-cells-CD21pos_infection_Up
GO Biological Processes	19	GO:0006968	cellular defense response	19_GO:0050896 response to stimulus	-3	8.8	5.3	30182	51	269	4	1.5	0.74	3959|10288|10312|50852	LGALS3BP|LILRB2|TCIRG1|TRAT1	-1.7	RNA_Keller_B-cells-CD21pos_infection_Up
GO Biological Processes	19	GO:0051346	negative regulation of hydrolase activity	19_GO:0065007 biological regulation	-3	3.3	4	30182	344	269	10	3.7	1.2	1508|2621|3958|5176|5265|5345|5743|5973|5997|221476	CTSB|GAS6|LGALS3|SERPINF1|SERPINA1|SERPINF2|PTGS2|RENBP|RGS2|PI16	-1.7	RNA_Keller_B-cells-CD21pos_infection_Up
GO Biological Processes	19	GO:1903305	regulation of regulated secretory pathway	19_GO:0051179 localization	-2.9	5.2	4.5	30182	130	269	6	2.2	0.9	2242|2268|3134|3162|23208|192683	FES|FGR|HLA-F|HMOX1|SYT11|SCAMP5	-1.7	RNA_Keller_B-cells-CD21pos_infection_Up
GO Biological Processes	19	GO:0002521	leukocyte differentiation	19_GO:0032502 developmental process	-2.9	3	3.9	30182	406	269	11	4.1	1.2	843|925|2529|2621|3601|4055|5795|6659|7480|10312|30009	CASP10|CD8A|FUT7|GAS6|IL15RA|LTBR|PTPRJ|SOX4|WNT10B|TCIRG1|TBX21	-1.7	RNA_Keller_B-cells-CD21pos_infection_Up
GO Biological Processes	19	GO:0032675	regulation of interleukin-6 production	19_GO:0032501 multicellular organismal process	-2.9	4.4	4.3	30182	178	269	7	2.6	0.97	199|2621|5027|10288|10417|23208|64127	AIF1|GAS6|P2RX7|LILRB2|SPON2|SYT11|NOD2	-1.7	RNA_Keller_B-cells-CD21pos_infection_Up
GO Biological Processes	19	GO:0050672	negative regulation of lymphocyte proliferation	19_GO:0002376 immune system process	-2.9	6.4	4.8	30182	88	269	5	1.9	0.82	868|7940|9231|10288|23495	CBLB|LST1|DLG5|LILRB2|TNFRSF13B	-1.7	RNA_Keller_B-cells-CD21pos_infection_Up
GO Biological Processes	19	GO:0050868	negative regulation of T cell activation	19_GO:0002376 immune system process	-2.9	5.1	4.5	30182	131	269	6	2.2	0.9	868|3958|9231|10288|10875|30009	CBLB|LGALS3|DLG5|LILRB2|FGL2|TBX21	-1.7	RNA_Keller_B-cells-CD21pos_infection_Up
GO Biological Processes	19	GO:0032652	regulation of interleukin-1 production	19_GO:0032501 multicellular organismal process	-2.9	5.1	4.5	30182	131	269	6	2.2	0.9	54|2621|4210|5027|64127|115362	ACP5|GAS6|MEFV|P2RX7|NOD2|GBP5	-1.7	RNA_Keller_B-cells-CD21pos_infection_Up
GO Biological Processes	19	GO:0006887	exocytosis	19_GO:0051179 localization	-2.9	3.9	4.2	30182	232	269	8	3	1	3055|5027|7127|8676|9143|10125|23208|192683	HCK|P2RX7|TNFAIP2|STX11|SYNGR3|RASGRP1|SYT11|SCAMP5	-1.7	RNA_Keller_B-cells-CD21pos_infection_Up
GO Biological Processes	19	GO:0002715	regulation of natural killer cell mediated immunity	19_GO:0044419 biological process involved in interspecies interaction between organisms	-2.9	8.6	5.2	30182	52	269	4	1.5	0.74	3134|10125|10225|146850	HLA-F|RASGRP1|CD96|PIK3R6	-1.7	RNA_Keller_B-cells-CD21pos_infection_Up
GO Biological Processes	19	GO:0051048	negative regulation of secretion	19_GO:0051179 localization	-2.9	4.4	4.3	30182	180	269	7	2.6	0.97	1636|2867|3134|3162|3767|7133|23208	ACE|FFAR2|HLA-F|HMOX1|KCNJ11|TNFRSF1B|SYT11	-1.7	RNA_Keller_B-cells-CD21pos_infection_Up
GO Biological Processes	19	GO:0007265	Ras protein signal transduction	19_GO:0023052 signaling	-2.9	4.4	4.3	30182	180	269	7	2.6	0.97	199|1026|2247|9289|10125|64787|79930	AIF1|CDKN1A|FGF2|ADGRG1|RASGRP1|EPS8L2|DOK3	-1.7	RNA_Keller_B-cells-CD21pos_infection_Up
GO Biological Processes	19	GO:0045580	regulation of T cell differentiation	19_GO:0002376 immune system process	-2.9	4.4	4.3	30182	180	269	7	2.6	0.97	6659|7480|10125|10288|10875|30009|146850	SOX4|WNT10B|RASGRP1|LILRB2|FGL2|TBX21|PIK3R6	-1.7	RNA_Keller_B-cells-CD21pos_infection_Up
GO Biological Processes	19	GO:0032945	negative regulation of mononuclear cell proliferation	19_GO:0048519 negative regulation of biological process	-2.9	6.3	4.8	30182	89	269	5	1.9	0.82	868|7940|9231|10288|23495	CBLB|LST1|DLG5|LILRB2|TNFRSF13B	-1.7	RNA_Keller_B-cells-CD21pos_infection_Up
GO Biological Processes	19	GO:0003071	renal system process involved in regulation of systemic arterial blood pressure	19_GO:0032501 multicellular organismal process	-2.9	14	6.1	30182	24	269	3	1.1	0.64	2621|5125|5345	GAS6|PCSK5|SERPINF2	-1.7	RNA_Keller_B-cells-CD21pos_infection_Up
GO Biological Processes	19	GO:0061484	hematopoietic stem cell homeostasis	19_GO:0042592 homeostatic process	-2.9	14	6.1	30182	24	269	3	1.1	0.64	6659|9289|10312	SOX4|ADGRG1|TCIRG1	-1.7	RNA_Keller_B-cells-CD21pos_infection_Up
GO Biological Processes	19	GO:0090335	regulation of brown fat cell differentiation	19_GO:0032502 developmental process	-2.9	14	6.1	30182	24	269	3	1.1	0.64	5743|252995|284207	PTGS2|FNDC5|METRNL	-1.7	RNA_Keller_B-cells-CD21pos_infection_Up
GO Biological Processes	19	GO:0010640	regulation of platelet-derived growth factor receptor signaling pathway	19_GO:0023052 signaling	-2.9	14	6.1	30182	24	269	3	1.1	0.64	347|868|5795	APOD|CBLB|PTPRJ	-1.7	RNA_Keller_B-cells-CD21pos_infection_Up
GO Biological Processes	19	GO:0040017	positive regulation of locomotion	19_GO:0040011 locomotion	-2.9	2.6	3.7	30182	609	269	14	5.2	1.4	199|2247|2268|2529|2621|3162|3687|3958|5743|6282|8482|8613|10519|23604	AIF1|FGF2|FGR|FUT7|GAS6|HMOX1|ITGAX|LGALS3|PTGS2|S100A11|SEMA7A|PLPP3|CIB1|DAPK2	-1.7	RNA_Keller_B-cells-CD21pos_infection_Up
GO Biological Processes	19	GO:0002220	innate immune response activating cell surface receptor signaling pathway	19_GO:0044419 biological process involved in interspecies interaction between organisms	-2.9	8.5	5.2	30182	53	269	4	1.5	0.74	2867|4938|64127|78989	FFAR2|OAS1|NOD2|COLEC11	-1.7	RNA_Keller_B-cells-CD21pos_infection_Up
GO Biological Processes	19	GO:0001776	leukocyte homeostasis	19_GO:0042592 homeostatic process	-2.9	6.2	4.7	30182	90	269	5	1.9	0.82	355|5027|10312|23495|124976	FAS|P2RX7|TCIRG1|TNFRSF13B|SPNS2	-1.7	RNA_Keller_B-cells-CD21pos_infection_Up
KEGG Pathway	24	hsa04360	Axon guidance		-2.9	4.3	4.3	30182	182	269	7	2.6	0.97	1808|2049|2242|8482|10154|23654|91653	DPYSL2|EPHB3|FES|SEMA7A|PLXNC1|PLXNB2|BOC	-1.7	RNA_Keller_B-cells-CD21pos_infection_Up
GO Biological Processes	19	GO:0010466	negative regulation of peptidase activity	19_GO:0048519 negative regulation of biological process	-2.9	3.8	4.1	30182	235	269	8	3	1	1508|2621|5176|5265|5345|5743|5973|221476	CTSB|GAS6|SERPINF1|SERPINA1|SERPINF2|PTGS2|RENBP|PI16	-1.7	RNA_Keller_B-cells-CD21pos_infection_Up
Reactome Gene Sets	6	R-HSA-76005	Response to elevated platelet cytosolic Ca2+		-2.9	5	4.4	30182	134	269	6	2.2	0.9	1675|2621|3959|5265|5345|7273	CFD|GAS6|LGALS3BP|SERPINA1|SERPINF2|TTN	-1.7	RNA_Keller_B-cells-CD21pos_infection_Up
GO Biological Processes	19	GO:0055082	cellular chemical homeostasis	19_GO:0042592 homeostatic process	-2.9	2.7	3.7	30182	546	269	13	4.8	1.3	20|1636|2621|3101|3162|5029|5176|6261|6556|6659|10312|83697|94103	ABCA2|ACE|GAS6|HK3|HMOX1|P2RY2|SERPINF1|RYR1|SLC11A1|SOX4|TCIRG1|SLC4A9|ORMDL3	-1.6	RNA_Keller_B-cells-CD21pos_infection_Up
GO Biological Processes	19	GO:0030855	epithelial cell differentiation	19_GO:0032502 developmental process	-2.9	2.6	3.7	30182	615	269	14	5.2	1.4	307|1508|2247|3280|3753|3958|6659|7041|7480|8321|8419|9231|10170|124093	ANXA4|CTSB|FGF2|HES1|KCNE1|LGALS3|SOX4|TGFB1I1|WNT10B|FZD1|BFSP2|DLG5|DHRS9|CCDC78	-1.6	RNA_Keller_B-cells-CD21pos_infection_Up
Canonical Pathways	11	M256	PID TAP63 PATHWAY		-2.9	8.3	5.1	30182	54	269	4	1.5	0.74	355|667|1026|27113	FAS|DST|CDKN1A|BBC3	-1.6	RNA_Keller_B-cells-CD21pos_infection_Up
GO Biological Processes	19	GO:0002475	antigen processing and presentation via MHC class Ib	19_GO:0002376 immune system process	-2.9	13	5.9	30182	25	269	3	1.1	0.64	911|3107|3134	CD1C|HLA-C|HLA-F	-1.6	RNA_Keller_B-cells-CD21pos_infection_Up
Reactome Gene Sets	6	R-HSA-9705462	Inactivation of CSF3 (G-CSF) signaling		-2.9	13	5.9	30182	25	269	3	1.1	0.64	3055|6772|9021	HCK|STAT1|SOCS3	-1.6	RNA_Keller_B-cells-CD21pos_infection_Up
KEGG Pathway	24	hsa04060	Cytokine-cytokine receptor interaction		-2.9	3.4	4	30182	295	269	9	3.3	1.1	355|2833|3587|3601|4055|7133|9560|10148|23495	FAS|CXCR3|IL10RA|IL15RA|LTBR|TNFRSF1B|CCL4L2|EBI3|TNFRSF13B	-1.6	RNA_Keller_B-cells-CD21pos_infection_Up
GO Biological Processes	19	GO:0071356	cellular response to tumor necrosis factor	19_GO:0050896 response to stimulus	-2.9	4.2	4.2	30182	185	269	7	2.6	0.97	355|2633|2634|3280|6772|7133|10519	FAS|GBP1|GBP2|HES1|STAT1|TNFRSF1B|CIB1	-1.6	RNA_Keller_B-cells-CD21pos_infection_Up
GO Biological Processes	19	GO:0060761	negative regulation of response to cytokine stimulus	19_GO:0048519 negative regulation of biological process	-2.8	6.1	4.6	30182	92	269	5	1.9	0.82	2621|4938|4940|11240|84166	GAS6|OAS1|OAS3|PADI2|NLRC5	-1.6	RNA_Keller_B-cells-CD21pos_infection_Up
GO Biological Processes	19	GO:0033673	negative regulation of kinase activity	19_GO:0048519 negative regulation of biological process	-2.8	3.8	4.1	30182	239	269	8	3	1	868|1026|1031|4041|5795|5997|7453|9961	CBLB|CDKN1A|CDKN2C|LRP5|PTPRJ|RGS2|WARS1|MVP	-1.6	RNA_Keller_B-cells-CD21pos_infection_Up
GO Biological Processes	19	GO:0050678	regulation of epithelial cell proliferation	19_GO:0050789 regulation of biological process	-2.8	2.9	3.8	30182	419	269	11	4.1	1.2	2247|3162|3280|5176|6772|7480|64127|116844|120425|151306|283131	FGF2|HMOX1|HES1|SERPINF1|STAT1|WNT10B|NOD2|LRG1|JAML|GPBAR1|NEAT1	-1.6	RNA_Keller_B-cells-CD21pos_infection_Up
Reactome Gene Sets	6	R-HSA-202733	Cell surface interactions at the vascular wall		-2.8	4.9	4.4	30182	137	269	6	2.2	0.9	2621|3687|7525|9672|54210|120425	GAS6|ITGAX|YES1|SDC3|TREM1|JAML	-1.6	RNA_Keller_B-cells-CD21pos_infection_Up
Canonical Pathways	11	M145	PID P53 DOWNSTREAM PATHWAY		-2.8	4.9	4.4	30182	137	269	6	2.2	0.9	355|843|1026|1820|3090|27113	FAS|CASP10|CDKN1A|ARID3A|HIC1|BBC3	-1.6	RNA_Keller_B-cells-CD21pos_infection_Up
Reactome Gene Sets	6	R-HSA-9660826	Purinergic signaling in leishmaniasis infection		-2.8	13	5.8	30182	26	269	3	1.1	0.64	3162|4210|5027	HMOX1|MEFV|P2RX7	-1.6	RNA_Keller_B-cells-CD21pos_infection_Up
Reactome Gene Sets	6	R-HSA-9664424	Cell recruitment (pro-inflammatory response)		-2.8	13	5.8	30182	26	269	3	1.1	0.64	3162|4210|5027	HMOX1|MEFV|P2RX7	-1.6	RNA_Keller_B-cells-CD21pos_infection_Up
Canonical Pathways	11	M36	PID IL27 PATHWAY		-2.8	13	5.8	30182	26	269	3	1.1	0.64	6772|10148|30009	STAT1|EBI3|TBX21	-1.6	RNA_Keller_B-cells-CD21pos_infection_Up
GO Biological Processes	19	GO:0002707	negative regulation of lymphocyte mediated immunity	19_GO:0002376 immune system process	-2.8	8	5	30182	56	269	4	1.5	0.74	3134|10225|30009|64127	HLA-F|CD96|TBX21|NOD2	-1.6	RNA_Keller_B-cells-CD21pos_infection_Up
Canonical Pathways	11	M99	PID TXA2PATHWAY		-2.8	8	5	30182	56	269	4	1.5	0.74	2268|3055|7525|146850	FGR|HCK|YES1|PIK3R6	-1.6	RNA_Keller_B-cells-CD21pos_infection_Up
KEGG Pathway	24	hsa05162	Measles		-2.8	4.8	4.3	30182	139	269	6	2.2	0.9	355|868|4938|4940|6772|27113	FAS|CBLB|OAS1|OAS3|STAT1|BBC3	-1.6	RNA_Keller_B-cells-CD21pos_infection_Up
GO Biological Processes	19	GO:0009410	response to xenobiotic stimulus	19_GO:0050896 response to stimulus	-2.8	2.9	3.7	30182	425	269	11	4.1	1.2	20|1636|1848|2621|3162|3767|5027|5743|6772|8321|8412	ABCA2|ACE|DUSP6|GAS6|HMOX1|KCNJ11|P2RX7|PTGS2|STAT1|FZD1|BCAR3	-1.6	RNA_Keller_B-cells-CD21pos_infection_Up
GO Biological Processes	19	GO:0046942	carboxylic acid transport	19_GO:0051179 localization	-2.8	3.7	4	30182	244	269	8	3	1	366|1636|2055|5027|5743|6556|55244|123096	AQP9|ACE|CLN8|P2RX7|PTGS2|SLC11A1|SLC47A1|SLC25A29	-1.6	RNA_Keller_B-cells-CD21pos_infection_Up
GO Biological Processes	19	GO:0090066	regulation of anatomical structure size	19_GO:0065007 biological regulation	-2.8	2.7	3.7	30182	492	269	12	4.5	1.3	1636|2055|2784|3055|5027|5029|5345|5743|5997|8482|23406|65078	ACE|CLN8|GNB3|HCK|P2RX7|P2RY2|SERPINF2|PTGS2|RGS2|SEMA7A|COTL1|RTN4R	-1.6	RNA_Keller_B-cells-CD21pos_infection_Up
Reactome Gene Sets	6	R-HSA-168643	Nucleotide-binding domain, leucine rich repeat containing receptor (NLR) signaling pathways		-2.8	7.9	4.9	30182	57	269	4	1.5	0.74	3162|4210|5027|64127	HMOX1|MEFV|P2RX7|NOD2	-1.6	RNA_Keller_B-cells-CD21pos_infection_Up
GO Biological Processes	19	GO:0048534	hematopoietic or lymphoid organ development	19_GO:0002376 immune system process	-2.8	5.8	4.5	30182	96	269	5	1.9	0.82	2049|3280|4041|4055|124976	EPHB3|HES1|LRP5|LTBR|SPNS2	-1.6	RNA_Keller_B-cells-CD21pos_infection_Up
GO Biological Processes	19	GO:0070664	negative regulation of leukocyte proliferation	19_GO:0048519 negative regulation of biological process	-2.8	5.8	4.5	30182	96	269	5	1.9	0.82	868|7940|9231|10288|23495	CBLB|LST1|DLG5|LILRB2|TNFRSF13B	-1.6	RNA_Keller_B-cells-CD21pos_infection_Up
KEGG Pathway	24	hsa04062	Chemokine signaling pathway		-2.8	4.1	4.1	30182	192	269	7	2.6	0.97	2268|2784|2833|3055|6772|9560|146850	FGR|GNB3|CXCR3|HCK|STAT1|CCL4L2|PIK3R6	-1.6	RNA_Keller_B-cells-CD21pos_infection_Up
GO Biological Processes	19	GO:0002710	negative regulation of T cell mediated immunity	19_GO:0002376 immune system process	-2.8	12	5.7	30182	27	269	3	1.1	0.64	3134|30009|64127	HLA-F|TBX21|NOD2	-1.6	RNA_Keller_B-cells-CD21pos_infection_Up
GO Biological Processes	19	GO:0042832	defense response to protozoan	19_GO:0044419 biological process involved in interspecies interaction between organisms	-2.8	12	5.7	30182	27	269	3	1.1	0.64	2634|6556|115361	GBP2|SLC11A1|GBP4	-1.6	RNA_Keller_B-cells-CD21pos_infection_Up
GO Biological Processes	19	GO:0045055	regulated exocytosis	19_GO:0051179 localization	-2.8	4.7	4.2	30182	142	269	6	2.2	0.9	3055|5027|8676|9143|10125|23208	HCK|P2RX7|STX11|SYNGR3|RASGRP1|SYT11	-1.6	RNA_Keller_B-cells-CD21pos_infection_Up
GO Biological Processes	19	GO:0009991	response to extracellular stimulus	19_GO:0050896 response to stimulus	-2.7	2.7	3.7	30182	496	269	12	4.5	1.3	199|355|1026|1636|2242|2621|2696|3162|5027|5743|6772|64127	AIF1|FAS|CDKN1A|ACE|FES|GAS6|GIPR|HMOX1|P2RX7|PTGS2|STAT1|NOD2	-1.6	RNA_Keller_B-cells-CD21pos_infection_Up
GO Biological Processes	19	GO:0043433	negative regulation of DNA-binding transcription factor activity	19_GO:0008152 metabolic process	-2.7	4	4	30182	194	269	7	2.6	0.97	307|2621|3162|3280|64127|84166|150094	ANXA4|GAS6|HMOX1|HES1|NOD2|NLRC5|SIK1	-1.6	RNA_Keller_B-cells-CD21pos_infection_Up
GO Biological Processes	19	GO:0051222	positive regulation of protein transport	19_GO:0051179 localization	-2.7	3.3	3.8	30182	308	269	9	3.3	1.1	2621|2696|2867|5027|5743|6659|7273|10519|27113	GAS6|GIPR|FFAR2|P2RX7|PTGS2|SOX4|TTN|CIB1|BBC3	-1.5	RNA_Keller_B-cells-CD21pos_infection_Up
GO Biological Processes	19	GO:0071902	positive regulation of protein serine/threonine kinase activity	19_GO:0048518 positive regulation of biological process	-2.7	4	4	30182	195	269	7	2.6	0.97	2247|5027|7786|10125|10519|64127|146850	FGF2|P2RX7|MAP3K12|RASGRP1|CIB1|NOD2|PIK3R6	-1.5	RNA_Keller_B-cells-CD21pos_infection_Up
GO Biological Processes	19	GO:0001961	positive regulation of cytokine-mediated signaling pathway	19_GO:0023052 signaling	-2.7	7.6	4.8	30182	59	269	4	1.5	0.74	2621|83666|84166|146722	GAS6|PARP9|NLRC5|CD300LF	-1.5	RNA_Keller_B-cells-CD21pos_infection_Up
GO Biological Processes	19	GO:0001816	cytokine production	19_GO:0032501 multicellular organismal process	-2.7	12	5.5	30182	28	269	3	1.1	0.64	5125|9289|54210	PCSK5|ADGRG1|TREM1	-1.5	RNA_Keller_B-cells-CD21pos_infection_Up
GO Biological Processes	19	GO:0032703	negative regulation of interleukin-2 production	19_GO:0048519 negative regulation of biological process	-2.7	12	5.5	30182	28	269	3	1.1	0.64	2633|30009|64127	GBP1|TBX21|NOD2	-1.5	RNA_Keller_B-cells-CD21pos_infection_Up
Canonical Pathways	11	M252	PID IL8 CXCR1 PATHWAY		-2.7	12	5.5	30182	28	269	3	1.1	0.64	2268|3055|146850	FGR|HCK|PIK3R6	-1.5	RNA_Keller_B-cells-CD21pos_infection_Up
GO Biological Processes	19	GO:0042059	negative regulation of epidermal growth factor receptor signaling pathway	19_GO:0023052 signaling	-2.7	12	5.5	30182	28	269	3	1.1	0.64	868|5795|9961	CBLB|PTPRJ|MVP	-1.5	RNA_Keller_B-cells-CD21pos_infection_Up
GO Biological Processes	19	GO:0038094	Fc-gamma receptor signaling pathway	19_GO:0002376 immune system process	-2.7	12	5.5	30182	28	269	3	1.1	0.64	2268|3055|7525	FGR|HCK|YES1	-1.5	RNA_Keller_B-cells-CD21pos_infection_Up
GO Biological Processes	19	GO:0045926	negative regulation of growth	19_GO:0040007 growth	-2.7	3.6	3.9	30182	252	269	8	3	1	1026|1031|5795|5997|8482|8751|65078|221476	CDKN1A|CDKN2C|PTPRJ|RGS2|SEMA7A|ADAM15|RTN4R|PI16	-1.5	RNA_Keller_B-cells-CD21pos_infection_Up
GO Biological Processes	19	GO:0045604	regulation of epidermal cell differentiation	19_GO:0032502 developmental process	-2.7	7.5	4.8	30182	60	269	4	1.5	0.74	2247|3280|79413|81537	FGF2|HES1|ZBED2|SGPP1	-1.5	RNA_Keller_B-cells-CD21pos_infection_Up
GO Biological Processes	19	GO:0042246	tissue regeneration	19_GO:0040007 growth	-2.7	7.5	4.8	30182	60	269	4	1.5	0.74	347|1026|7480|8751	APOD|CDKN1A|WNT10B|ADAM15	-1.5	RNA_Keller_B-cells-CD21pos_infection_Up
GO Biological Processes	19	GO:0002444	myeloid leukocyte mediated immunity	19_GO:0002376 immune system process	-2.7	7.5	4.8	30182	60	269	4	1.5	0.74	1636|10125|10417|54210	ACE|RASGRP1|SPON2|TREM1	-1.5	RNA_Keller_B-cells-CD21pos_infection_Up
GO Biological Processes	19	GO:0000902	cell morphogenesis	19_GO:0032502 developmental process	-2.7	2.4	3.5	30182	643	269	14	5.2	1.4	1742|2049|3280|4135|5027|7940|8482|8522|10129|10154|10519|23654|65078|91653	DLG4|EPHB3|HES1|MAP6|P2RX7|LST1|SEMA7A|GAS7|FRY|PLXNC1|CIB1|PLXNB2|RTN4R|BOC	-1.5	RNA_Keller_B-cells-CD21pos_infection_Up
Canonical Pathways	11	M124	PID CXCR4 PATHWAY		-2.7	5.6	4.4	30182	100	269	5	1.9	0.82	2268|3055|6772|7525|146850	FGR|HCK|STAT1|YES1|PIK3R6	-1.5	RNA_Keller_B-cells-CD21pos_infection_Up
GO Biological Processes	19	GO:0032755	positive regulation of interleukin-6 production	19_GO:0048518 positive regulation of biological process	-2.7	5.6	4.4	30182	100	269	5	1.9	0.82	199|5027|10288|10417|64127	AIF1|P2RX7|LILRB2|SPON2|NOD2	-1.5	RNA_Keller_B-cells-CD21pos_infection_Up
GO Biological Processes	19	GO:0046631	alpha-beta T cell activation	19_GO:0002376 immune system process	-2.7	5.6	4.4	30182	100	269	5	1.9	0.82	868|2529|10312|28639|30009	CBLB|FUT7|TCIRG1|TRBC1|TBX21	-1.5	RNA_Keller_B-cells-CD21pos_infection_Up
KEGG Pathway	24	hsa04061	Viral protein interaction with cytokine and cytokine receptor		-2.7	5.6	4.4	30182	100	269	5	1.9	0.82	2833|3587|4055|7133|9560	CXCR3|IL10RA|LTBR|TNFRSF1B|CCL4L2	-1.5	RNA_Keller_B-cells-CD21pos_infection_Up
KEGG Pathway	24	hsa05224	Breast cancer		-2.7	4.6	4.1	30182	147	269	6	2.2	0.9	1026|2247|3280|4041|7480|8321	CDKN1A|FGF2|HES1|LRP5|WNT10B|FZD1	-1.5	RNA_Keller_B-cells-CD21pos_infection_Up
GO Biological Processes	19	GO:0071248	cellular response to metal ion	19_GO:0050896 response to stimulus	-2.7	3.9	4	30182	199	269	7	2.6	0.97	1742|3162|5176|5743|6261|23208|57699	DLG4|HMOX1|SERPINF1|PTGS2|RYR1|SYT11|CPNE5	-1.5	RNA_Keller_B-cells-CD21pos_infection_Up
GO Biological Processes	19	GO:0001501	skeletal system development	19_GO:0032502 developmental process	-2.7	2.7	3.6	30182	507	269	12	4.5	1.3	54|2247|2268|3217|3340|4041|5027|5125|6261|6659|7480|124976	ACP5|FGF2|FGR|HOXB7|NDST1|LRP5|P2RX7|PCSK5|RYR1|SOX4|WNT10B|SPNS2	-1.5	RNA_Keller_B-cells-CD21pos_infection_Up
GO Biological Processes	19	GO:0060070	canonical Wnt signaling pathway	19_GO:0023052 signaling	-2.7	5.6	4.3	30182	101	269	5	1.9	0.82	2247|4041|7480|8321|8613	FGF2|LRP5|WNT10B|FZD1|PLPP3	-1.5	RNA_Keller_B-cells-CD21pos_infection_Up
Canonical Pathways	11	M169	PID INTEGRIN2 PATHWAY		-2.7	12	5.4	30182	29	269	3	1.1	0.64	2212|3687|10417	FCGR2A|ITGAX|SPON2	-1.5	RNA_Keller_B-cells-CD21pos_infection_Up
GO Biological Processes	19	GO:0001562	response to protozoan	19_GO:0044419 biological process involved in interspecies interaction between organisms	-2.7	12	5.4	30182	29	269	3	1.1	0.64	2634|6556|115361	GBP2|SLC11A1|GBP4	-1.5	RNA_Keller_B-cells-CD21pos_infection_Up
GO Biological Processes	19	GO:0048678	response to axon injury	19_GO:0050896 response to stimulus	-2.7	7.4	4.7	30182	61	269	4	1.5	0.74	199|347|2247|2696	AIF1|APOD|FGF2|GIPR	-1.5	RNA_Keller_B-cells-CD21pos_infection_Up
GO Biological Processes	19	GO:1905477	positive regulation of protein localization to membrane	19_GO:0051179 localization	-2.7	5.5	4.3	30182	102	269	5	1.9	0.82	1742|3958|10519|27113|246329	DLG4|LGALS3|CIB1|BBC3|STAC3	-1.5	RNA_Keller_B-cells-CD21pos_infection_Up
GO Biological Processes	19	GO:0051047	positive regulation of secretion	19_GO:0051179 localization	-2.6	3.2	3.7	30182	316	269	9	3.3	1.1	2268|2696|2867|3134|5027|5029|6659|7273|192683	FGR|GIPR|FFAR2|HLA-F|P2RX7|P2RY2|SOX4|TTN|SCAMP5	-1.5	RNA_Keller_B-cells-CD21pos_infection_Up
GO Biological Processes	19	GO:0051592	response to calcium ion	19_GO:0050896 response to stimulus	-2.6	4.5	4.1	30182	149	269	6	2.2	0.9	2696|5027|6261|7273|23208|57699	GIPR|P2RX7|RYR1|TTN|SYT11|CPNE5	-1.5	RNA_Keller_B-cells-CD21pos_infection_Up
GO Biological Processes	19	GO:1903038	negative regulation of leukocyte cell-cell adhesion	19_GO:0048519 negative regulation of biological process	-2.6	4.5	4.1	30182	150	269	6	2.2	0.9	868|3958|9231|10288|10875|30009	CBLB|LGALS3|DLG5|LILRB2|FGL2|TBX21	-1.5	RNA_Keller_B-cells-CD21pos_infection_Up
GO Biological Processes	19	GO:1903076	regulation of protein localization to plasma membrane	19_GO:0051179 localization	-2.6	5.4	4.3	30182	103	269	5	1.9	0.82	2633|3958|10519|51225|246329	GBP1|LGALS3|CIB1|ABI3|STAC3	-1.5	RNA_Keller_B-cells-CD21pos_infection_Up
GO Biological Processes	19	GO:0032309	icosanoid secretion	19_GO:0051179 localization	-2.6	11	5.3	30182	30	269	3	1.1	0.64	1636|5027|5743	ACE|P2RX7|PTGS2	-1.5	RNA_Keller_B-cells-CD21pos_infection_Up
Reactome Gene Sets	6	R-HSA-9674555	Signaling by CSF3 (G-CSF)		-2.6	11	5.3	30182	30	269	3	1.1	0.64	3055|6772|9021	HCK|STAT1|SOCS3	-1.5	RNA_Keller_B-cells-CD21pos_infection_Up
GO Biological Processes	19	GO:0097066	response to thyroid hormone	19_GO:0050896 response to stimulus	-2.6	11	5.3	30182	30	269	3	1.1	0.64	1508|1636|3280	CTSB|ACE|HES1	-1.5	RNA_Keller_B-cells-CD21pos_infection_Up
Canonical Pathways	11	M257	PID EPHRINB REV PATHWAY		-2.6	11	5.3	30182	30	269	3	1.1	0.64	2268|3055|7525	FGR|HCK|YES1	-1.5	RNA_Keller_B-cells-CD21pos_infection_Up
GO Biological Processes	19	GO:0048741	skeletal muscle fiber development	19_GO:0032502 developmental process	-2.6	11	5.3	30182	30	269	3	1.1	0.64	6261|7480|246329	RYR1|WNT10B|STAC3	-1.5	RNA_Keller_B-cells-CD21pos_infection_Up
Reactome Gene Sets	6	R-HSA-382551	Transport of small molecules		-2.6	2.3	3.4	30182	728	269	15	5.6	1.4	20|347|366|2784|3162|3767|5002|5125|5698|6261|6556|10312|55244|83697|123096	ABCA2|APOD|AQP9|GNB3|HMOX1|KCNJ11|SLC22A18|PCSK5|PSMB9|RYR1|SLC11A1|TCIRG1|SLC47A1|SLC4A9|SLC25A29	-1.5	RNA_Keller_B-cells-CD21pos_infection_Up
GO Biological Processes	19	GO:0048872	homeostasis of number of cells	19_GO:0042592 homeostatic process	-2.6	3.5	3.8	30182	260	269	8	3	1	355|3162|5027|6659|9289|10312|23495|124976	FAS|HMOX1|P2RX7|SOX4|ADGRG1|TCIRG1|TNFRSF13B|SPNS2	-1.5	RNA_Keller_B-cells-CD21pos_infection_Up
GO Biological Processes	19	GO:0070542	response to fatty acid	19_GO:0050896 response to stimulus	-2.6	7.1	4.6	30182	63	269	4	1.5	0.74	2696|2867|3280|5743	GIPR|FFAR2|HES1|PTGS2	-1.5	RNA_Keller_B-cells-CD21pos_infection_Up
GO Biological Processes	19	GO:0032731	positive regulation of interleukin-1 beta production	19_GO:0048518 positive regulation of biological process	-2.6	7.1	4.6	30182	63	269	4	1.5	0.74	4210|5027|64127|115362	MEFV|P2RX7|NOD2|GBP5	-1.5	RNA_Keller_B-cells-CD21pos_infection_Up
GO Biological Processes	19	GO:1901655	cellular response to ketone	19_GO:0050896 response to stimulus	-2.6	5.3	4.2	30182	105	269	5	1.9	0.82	1636|2621|5176|8751|55809	ACE|GAS6|SERPINF1|ADAM15|TRERF1	-1.5	RNA_Keller_B-cells-CD21pos_infection_Up
GO Biological Processes	19	GO:0071300	cellular response to retinoic acid	19_GO:0050896 response to stimulus	-2.6	7	4.6	30182	64	269	4	1.5	0.74	4058|5176|7480|7525	LTK|SERPINF1|WNT10B|YES1	-1.5	RNA_Keller_B-cells-CD21pos_infection_Up
GO Biological Processes	19	GO:0035710	CD4-positive, alpha-beta T cell activation	19_GO:0002376 immune system process	-2.6	7	4.6	30182	64	269	4	1.5	0.74	868|2529|10312|30009	CBLB|FUT7|TCIRG1|TBX21	-1.5	RNA_Keller_B-cells-CD21pos_infection_Up
GO Biological Processes	19	GO:0043304	regulation of mast cell degranulation	19_GO:0002376 immune system process	-2.6	11	5.2	30182	31	269	3	1.1	0.64	2242|2268|3162	FES|FGR|HMOX1	-1.5	RNA_Keller_B-cells-CD21pos_infection_Up
Reactome Gene Sets	6	R-HSA-9680350	Signaling by CSF1 (M-CSF) in myeloid cells		-2.6	11	5.2	30182	31	269	3	1.1	0.64	3055|6772|7525	HCK|STAT1|YES1	-1.5	RNA_Keller_B-cells-CD21pos_infection_Up
GO Biological Processes	19	GO:0034311	diol metabolic process	19_GO:0008152 metabolic process	-2.6	11	5.2	30182	31	269	3	1.1	0.64	20|8613|81537	ABCA2|PLPP3|SGPP1	-1.5	RNA_Keller_B-cells-CD21pos_infection_Up
GO Biological Processes	19	GO:0009746	response to hexose	19_GO:0050896 response to stimulus	-2.6	4.4	4	30182	154	269	6	2.2	0.9	1636|2621|2696|5176|5743|6659	ACE|GAS6|GIPR|SERPINF1|PTGS2|SOX4	-1.5	RNA_Keller_B-cells-CD21pos_infection_Up
GO Biological Processes	19	GO:0044057	regulation of system process	19_GO:0032501 multicellular organismal process	-2.6	2.5	3.4	30182	591	269	13	4.8	1.3	199|1636|1742|1890|2621|3687|3753|5743|5997|7133|9229|94103|221476	AIF1|ACE|DLG4|TYMP|GAS6|ITGAX|KCNE1|PTGS2|RGS2|TNFRSF1B|DLGAP1|ORMDL3|PI16	-1.5	RNA_Keller_B-cells-CD21pos_infection_Up
GO Biological Processes	19	GO:0008610	lipid biosynthetic process	19_GO:0008152 metabolic process	-2.6	2.5	3.4	30182	591	269	13	4.8	1.3	20|2055|2247|5027|5743|8613|8869|9021|10170|81537|94103|124976|146850	ABCA2|CLN8|FGF2|P2RX7|PTGS2|PLPP3|ST3GAL5|SOCS3|DHRS9|SGPP1|ORMDL3|SPNS2|PIK3R6	-1.5	RNA_Keller_B-cells-CD21pos_infection_Up
Reactome Gene Sets	6	R-HSA-373755	Semaphorin interactions		-2.6	6.9	4.5	30182	65	269	4	1.5	0.74	1808|2242|8482|10154	DPYSL2|FES|SEMA7A|PLXNC1	-1.4	RNA_Keller_B-cells-CD21pos_infection_Up
GO Biological Processes	19	GO:0048857	neural nucleus development	19_GO:0032502 developmental process	-2.6	6.9	4.5	30182	65	269	4	1.5	0.74	2247|3753|9143|11240	FGF2|KCNE1|SYNGR3|PADI2	-1.4	RNA_Keller_B-cells-CD21pos_infection_Up
GO Biological Processes	19	GO:0050770	regulation of axonogenesis	19_GO:0032502 developmental process	-2.6	4.3	4	30182	155	269	6	2.2	0.9	2049|4135|8482|10154|23654|65078	EPHB3|MAP6|SEMA7A|PLXNC1|PLXNB2|RTN4R	-1.4	RNA_Keller_B-cells-CD21pos_infection_Up
GO Biological Processes	19	GO:1903531	negative regulation of secretion by cell	19_GO:0051179 localization	-2.5	4.3	3.9	30182	156	269	6	2.2	0.9	2867|3134|3162|3767|7133|23208	FFAR2|HLA-F|HMOX1|KCNJ11|TNFRSF1B|SYT11	-1.4	RNA_Keller_B-cells-CD21pos_infection_Up
GO Biological Processes	19	GO:0043552	positive regulation of phosphatidylinositol 3-kinase activity	19_GO:0048518 positive regulation of biological process	-2.5	11	5.1	30182	32	269	3	1.1	0.64	2247|2268|64127	FGF2|FGR|NOD2	-1.4	RNA_Keller_B-cells-CD21pos_infection_Up
Reactome Gene Sets	6	R-HSA-451326	Activation of kainate receptors upon glutamate binding		-2.5	11	5.1	30182	32	269	3	1.1	0.64	1742|2784|2899	DLG4|GNB3|GRIK3	-1.4	RNA_Keller_B-cells-CD21pos_infection_Up
GO Biological Processes	19	GO:0019883	antigen processing and presentation of endogenous antigen	19_GO:0002376 immune system process	-2.5	11	5.1	30182	32	269	3	1.1	0.64	911|3107|3134	CD1C|HLA-C|HLA-F	-1.4	RNA_Keller_B-cells-CD21pos_infection_Up
GO Biological Processes	19	GO:0033032	regulation of myeloid cell apoptotic process	19_GO:0050789 regulation of biological process	-2.5	11	5.1	30182	32	269	3	1.1	0.64	2621|64127|440823	GAS6|NOD2|MIAT	-1.4	RNA_Keller_B-cells-CD21pos_infection_Up
Canonical Pathways	11	M275	PID ALPHA SYNUCLEIN PATHWAY		-2.5	11	5.1	30182	32	269	3	1.1	0.64	2268|3055|7525	FGR|HCK|YES1	-1.4	RNA_Keller_B-cells-CD21pos_infection_Up
GO Biological Processes	19	GO:0060760	positive regulation of response to cytokine stimulus	19_GO:0048518 positive regulation of biological process	-2.5	6.8	4.5	30182	66	269	4	1.5	0.74	2621|83666|84166|146722	GAS6|PARP9|NLRC5|CD300LF	-1.4	RNA_Keller_B-cells-CD21pos_infection_Up
KEGG Pathway	24	hsa05160	Hepatitis C		-2.5	4.3	3.9	30182	157	269	6	2.2	0.9	355|1026|4938|4940|6772|9021	FAS|CDKN1A|OAS1|OAS3|STAT1|SOCS3	-1.4	RNA_Keller_B-cells-CD21pos_infection_Up
GO Biological Processes	19	GO:0010976	positive regulation of neuron projection development	19_GO:0032502 developmental process	-2.5	4.3	3.9	30182	157	269	6	2.2	0.9	2242|4058|5176|5997|8321|23654	FES|LTK|SERPINF1|RGS2|FZD1|PLXNB2	-1.4	RNA_Keller_B-cells-CD21pos_infection_Up
GO Biological Processes	19	GO:0045861	negative regulation of proteolysis	19_GO:0048519 negative regulation of biological process	-2.5	3.1	3.6	30182	329	269	9	3.3	1.1	1508|2055|2621|5176|5265|5345|5743|5973|221476	CTSB|CLN8|GAS6|SERPINF1|SERPINA1|SERPINF2|PTGS2|RENBP|PI16	-1.4	RNA_Keller_B-cells-CD21pos_infection_Up
GO Biological Processes	19	GO:0015711	organic anion transport	19_GO:0051179 localization	-2.5	3.1	3.6	30182	330	269	9	3.3	1.1	366|1636|2055|5027|5743|6556|55244|83697|123096	AQP9|ACE|CLN8|P2RX7|PTGS2|SLC11A1|SLC47A1|SLC4A9|SLC25A29	-1.4	RNA_Keller_B-cells-CD21pos_infection_Up
GO Biological Processes	19	GO:0045682	regulation of epidermis development	19_GO:0032502 developmental process	-2.5	6.7	4.4	30182	67	269	4	1.5	0.74	2247|3280|79413|81537	FGF2|HES1|ZBED2|SGPP1	-1.4	RNA_Keller_B-cells-CD21pos_infection_Up
GO Biological Processes	19	GO:0001678	cellular glucose homeostasis	19_GO:0042592 homeostatic process	-2.5	5.1	4.1	30182	110	269	5	1.9	0.82	1636|2621|3101|5176|6659	ACE|GAS6|HK3|SERPINF1|SOX4	-1.4	RNA_Keller_B-cells-CD21pos_infection_Up
GO Biological Processes	19	GO:0097193	intrinsic apoptotic signaling pathway	19_GO:0023052 signaling	-2.5	4.2	3.9	30182	159	269	6	2.2	0.9	1026|3090|3162|7133|27113|81537	CDKN1A|HIC1|HMOX1|TNFRSF1B|BBC3|SGPP1	-1.4	RNA_Keller_B-cells-CD21pos_infection_Up
GO Biological Processes	19	GO:0033006	regulation of mast cell activation involved in immune response	19_GO:0002376 immune system process	-2.5	10	5	30182	33	269	3	1.1	0.64	2242|2268|3162	FES|FGR|HMOX1	-1.4	RNA_Keller_B-cells-CD21pos_infection_Up
GO Biological Processes	19	GO:1905476	negative regulation of protein localization to membrane	19_GO:0051179 localization	-2.5	10	5	30182	33	269	3	1.1	0.64	2633|3753|51225	GBP1|KCNE1|ABI3	-1.4	RNA_Keller_B-cells-CD21pos_infection_Up
GO Biological Processes	19	GO:1901185	negative regulation of ERBB signaling pathway	19_GO:0023052 signaling	-2.5	10	5	30182	33	269	3	1.1	0.64	868|5795|9961	CBLB|PTPRJ|MVP	-1.4	RNA_Keller_B-cells-CD21pos_infection_Up
GO Biological Processes	19	GO:0090279	regulation of calcium ion import	19_GO:0051179 localization	-2.5	10	5	30182	33	269	3	1.1	0.64	1636|3280|3958	ACE|HES1|LGALS3	-1.4	RNA_Keller_B-cells-CD21pos_infection_Up
GO Biological Processes	19	GO:0010817	regulation of hormone levels	19_GO:0065007 biological regulation	-2.5	2.5	3.4	30182	532	269	12	4.5	1.3	216|1508|1636|2696|2784|2867|3767|4041|5125|6659|10170|10312	ALDH1A1|CTSB|ACE|GIPR|GNB3|FFAR2|KCNJ11|LRP5|PCSK5|SOX4|DHRS9|TCIRG1	-1.4	RNA_Keller_B-cells-CD21pos_infection_Up
GO Biological Processes	19	GO:0010951	negative regulation of endopeptidase activity	19_GO:0048519 negative regulation of biological process	-2.5	4.2	3.9	30182	160	269	6	2.2	0.9	2621|5176|5265|5345|5743|5973	GAS6|SERPINF1|SERPINA1|SERPINF2|PTGS2|RENBP	-1.4	RNA_Keller_B-cells-CD21pos_infection_Up
GO Biological Processes	19	GO:1902475	L-alpha-amino acid transmembrane transport	19_GO:0051179 localization	-2.5	6.6	4.4	30182	68	269	4	1.5	0.74	2055|6556|55244|123096	CLN8|SLC11A1|SLC47A1|SLC25A29	-1.4	RNA_Keller_B-cells-CD21pos_infection_Up
GO Biological Processes	19	GO:2000401	regulation of lymphocyte migration	19_GO:0040011 locomotion	-2.5	6.6	4.4	30182	68	269	4	1.5	0.74	199|347|11240|124976	AIF1|APOD|PADI2|SPNS2	-1.4	RNA_Keller_B-cells-CD21pos_infection_Up
GO Biological Processes	19	GO:0009612	response to mechanical stimulus	19_GO:0050896 response to stimulus	-2.5	3.7	3.7	30182	215	269	7	2.6	0.97	355|2247|4055|5027|5743|6772|7273	FAS|FGF2|LTBR|P2RX7|PTGS2|STAT1|TTN	-1.4	RNA_Keller_B-cells-CD21pos_infection_Up
GO Biological Processes	19	GO:0050708	regulation of protein secretion	19_GO:0051179 localization	-2.5	3.3	3.6	30182	274	269	8	3	1	2696|2867|3767|4041|5027|6659|7273|10312	GIPR|FFAR2|KCNJ11|LRP5|P2RX7|SOX4|TTN|TCIRG1	-1.4	RNA_Keller_B-cells-CD21pos_infection_Up
GO Biological Processes	19	GO:0032651	regulation of interleukin-1 beta production	19_GO:0032501 multicellular organismal process	-2.5	5	4	30182	112	269	5	1.9	0.82	54|4210|5027|64127|115362	ACP5|MEFV|P2RX7|NOD2|GBP5	-1.4	RNA_Keller_B-cells-CD21pos_infection_Up
GO Biological Processes	19	GO:0048002	antigen processing and presentation of peptide antigen	19_GO:0002376 immune system process	-2.5	6.5	4.3	30182	69	269	4	1.5	0.74	1636|3107|3134|6556	ACE|HLA-C|HLA-F|SLC11A1	-1.4	RNA_Keller_B-cells-CD21pos_infection_Up
GO Biological Processes	19	GO:0015807	L-amino acid transport	19_GO:0051179 localization	-2.5	6.5	4.3	30182	69	269	4	1.5	0.74	2055|6556|55244|123096	CLN8|SLC11A1|SLC47A1|SLC25A29	-1.4	RNA_Keller_B-cells-CD21pos_infection_Up
GO Biological Processes	19	GO:0034284	response to monosaccharide	19_GO:0050896 response to stimulus	-2.5	4.2	3.8	30182	162	269	6	2.2	0.9	1636|2621|2696|5176|5743|6659	ACE|GAS6|GIPR|SERPINF1|PTGS2|SOX4	-1.4	RNA_Keller_B-cells-CD21pos_infection_Up
GO Biological Processes	19	GO:0050796	regulation of insulin secretion	19_GO:0051179 localization	-2.5	4.2	3.8	30182	162	269	6	2.2	0.9	2696|2867|3767|4041|6659|10312	GIPR|FFAR2|KCNJ11|LRP5|SOX4|TCIRG1	-1.4	RNA_Keller_B-cells-CD21pos_infection_Up
GO Biological Processes	19	GO:0002520	immune system development	19_GO:0002376 immune system process	-2.5	4.2	3.8	30182	162	269	6	2.2	0.9	868|2049|3280|4041|4055|124976	CBLB|EPHB3|HES1|LRP5|LTBR|SPNS2	-1.4	RNA_Keller_B-cells-CD21pos_infection_Up
Canonical Pathways	11	M210	PID IL8 CXCR2 PATHWAY		-2.5	9.9	4.9	30182	34	269	3	1.1	0.64	2268|3055|146850	FGR|HCK|PIK3R6	-1.4	RNA_Keller_B-cells-CD21pos_infection_Up
GO Biological Processes	19	GO:0014904	myotube cell development	19_GO:0032502 developmental process	-2.5	9.9	4.9	30182	34	269	3	1.1	0.64	6261|7480|246329	RYR1|WNT10B|STAC3	-1.4	RNA_Keller_B-cells-CD21pos_infection_Up
GO Biological Processes	19	GO:0031670	cellular response to nutrient	19_GO:0050896 response to stimulus	-2.5	9.9	4.9	30182	34	269	3	1.1	0.64	2242|2621|3162	FES|GAS6|HMOX1	-1.4	RNA_Keller_B-cells-CD21pos_infection_Up
GO Biological Processes	19	GO:0034405	response to fluid shear stress	19_GO:0050896 response to stimulus	-2.5	9.9	4.9	30182	34	269	3	1.1	0.64	1636|5027|5743	ACE|P2RX7|PTGS2	-1.4	RNA_Keller_B-cells-CD21pos_infection_Up
GO Biological Processes	19	GO:0010035	response to inorganic substance	19_GO:0050896 response to stimulus	-2.4	2.5	3.3	30182	540	269	12	4.5	1.3	1742|2696|3162|5027|5176|5743|6261|6772|7273|10312|23208|57699	DLG4|GIPR|HMOX1|P2RX7|SERPINF1|PTGS2|RYR1|STAT1|TTN|TCIRG1|SYT11|CPNE5	-1.4	RNA_Keller_B-cells-CD21pos_infection_Up
GO Biological Processes	19	GO:0006468	protein phosphorylation	19_GO:0008152 metabolic process	-2.4	2.3	3.2	30182	686	269	14	5.2	1.4	2049|2242|2268|2621|3055|4058|5027|7273|7525|7786|8482|23604|64127|150094	EPHB3|FES|FGR|GAS6|HCK|LTK|P2RX7|TTN|YES1|MAP3K12|SEMA7A|DAPK2|NOD2|SIK1	-1.4	RNA_Keller_B-cells-CD21pos_infection_Up
GO Biological Processes	19	GO:0045600	positive regulation of fat cell differentiation	19_GO:0032502 developmental process	-2.4	6.3	4.3	30182	71	269	4	1.5	0.74	4041|5743|252995|284207	LRP5|PTGS2|FNDC5|METRNL	-1.3	RNA_Keller_B-cells-CD21pos_infection_Up
GO Biological Processes	19	GO:0030098	lymphocyte differentiation	19_GO:0002376 immune system process	-2.4	3.2	3.5	30182	280	269	8	3	1	925|2529|3601|5795|6659|7480|10312|30009	CD8A|FUT7|IL15RA|PTPRJ|SOX4|WNT10B|TCIRG1|TBX21	-1.3	RNA_Keller_B-cells-CD21pos_infection_Up
GO Biological Processes	19	GO:0030856	regulation of epithelial cell differentiation	19_GO:0032502 developmental process	-2.4	4.1	3.7	30182	166	269	6	2.2	0.9	2247|3280|6772|7480|79413|81537	FGF2|HES1|STAT1|WNT10B|ZBED2|SGPP1	-1.3	RNA_Keller_B-cells-CD21pos_infection_Up
GO Biological Processes	19	GO:0048640	negative regulation of developmental growth	19_GO:0040007 growth	-2.4	4.8	3.9	30182	116	269	5	1.9	0.82	1026|5997|8482|65078|221476	CDKN1A|RGS2|SEMA7A|RTN4R|PI16	-1.3	RNA_Keller_B-cells-CD21pos_infection_Up
GO Biological Processes	19	GO:0006006	glucose metabolic process	19_GO:0008152 metabolic process	-2.4	4.8	3.9	30182	116	269	5	1.9	0.82	347|3101|3767|4041|4938	APOD|HK3|KCNJ11|LRP5|OAS1	-1.3	RNA_Keller_B-cells-CD21pos_infection_Up
GO Biological Processes	19	GO:0045582	positive regulation of T cell differentiation	19_GO:0002376 immune system process	-2.4	4.8	3.9	30182	116	269	5	1.9	0.82	6659|7480|10125|10288|146850	SOX4|WNT10B|RASGRP1|LILRB2|PIK3R6	-1.3	RNA_Keller_B-cells-CD21pos_infection_Up
KEGG Pathway	24	hsa05166	Human T-cell leukemia virus 1 infection		-2.4	3.5	3.6	30182	222	269	7	2.6	0.97	1026|1031|3107|3134|3601|4055|9586	CDKN1A|CDKN2C|HLA-C|HLA-F|IL15RA|LTBR|CREB5	-1.3	RNA_Keller_B-cells-CD21pos_infection_Up
GO Biological Processes	19	GO:0019216	regulation of lipid metabolic process	19_GO:0008152 metabolic process	-2.4	2.9	3.4	30182	344	269	9	3.3	1.1	20|347|2247|2268|2784|5743|64127|94103|150094	ABCA2|APOD|FGF2|FGR|GNB3|PTGS2|NOD2|ORMDL3|SIK1	-1.3	RNA_Keller_B-cells-CD21pos_infection_Up
GO Biological Processes	19	GO:0051926	negative regulation of calcium ion transport	19_GO:0051179 localization	-2.4	6.2	4.2	30182	72	269	4	1.5	0.74	1636|3280|5743|10288	ACE|HES1|PTGS2|LILRB2	-1.3	RNA_Keller_B-cells-CD21pos_infection_Up
GO Biological Processes	19	GO:0001990	regulation of systemic arterial blood pressure by hormone	19_GO:0032501 multicellular organismal process	-2.4	9.4	4.8	30182	36	269	3	1.1	0.64	1636|5125|5345	ACE|PCSK5|SERPINF2	-1.3	RNA_Keller_B-cells-CD21pos_infection_Up
GO Biological Processes	19	GO:1905332	positive regulation of morphogenesis of an epithelium	19_GO:0032502 developmental process	-2.4	9.4	4.8	30182	36	269	3	1.1	0.64	2247|3217|3687	FGF2|HOXB7|ITGAX	-1.3	RNA_Keller_B-cells-CD21pos_infection_Up
GO Biological Processes	19	GO:0002474	antigen processing and presentation of peptide antigen via MHC class I	19_GO:0002376 immune system process	-2.4	9.4	4.8	30182	36	269	3	1.1	0.64	1636|3107|3134	ACE|HLA-C|HLA-F	-1.3	RNA_Keller_B-cells-CD21pos_infection_Up
GO Biological Processes	19	GO:0010614	negative regulation of cardiac muscle hypertrophy	19_GO:0048519 negative regulation of biological process	-2.4	9.4	4.8	30182	36	269	3	1.1	0.64	5997|7133|221476	RGS2|TNFRSF1B|PI16	-1.3	RNA_Keller_B-cells-CD21pos_infection_Up
GO Biological Processes	19	GO:0090218	positive regulation of lipid kinase activity	19_GO:0048518 positive regulation of biological process	-2.4	9.4	4.8	30182	36	269	3	1.1	0.64	2247|2268|64127	FGF2|FGR|NOD2	-1.3	RNA_Keller_B-cells-CD21pos_infection_Up
GO Biological Processes	19	GO:0006865	amino acid transport	19_GO:0051179 localization	-2.4	4.8	3.9	30182	117	269	5	1.9	0.82	2055|5027|6556|55244|123096	CLN8|P2RX7|SLC11A1|SLC47A1|SLC25A29	-1.3	RNA_Keller_B-cells-CD21pos_infection_Up
GO Biological Processes	19	GO:0071260	cellular response to mechanical stimulus	19_GO:0050896 response to stimulus	-2.4	6.1	4.2	30182	73	269	4	1.5	0.74	355|2247|4055|5743	FAS|FGF2|LTBR|PTGS2	-1.3	RNA_Keller_B-cells-CD21pos_infection_Up
GO Biological Processes	19	GO:0008630	intrinsic apoptotic signaling pathway in response to DNA damage	19_GO:0023052 signaling	-2.4	6.1	4.2	30182	73	269	4	1.5	0.74	1026|3090|3162|7133	CDKN1A|HIC1|HMOX1|TNFRSF1B	-1.3	RNA_Keller_B-cells-CD21pos_infection_Up
GO Biological Processes	19	GO:0007568	aging	19_GO:0032502 developmental process	-2.4	4	3.7	30182	169	269	6	2.2	0.9	347|1636|2247|5176|5743|7133	APOD|ACE|FGF2|SERPINF1|PTGS2|TNFRSF1B	-1.3	RNA_Keller_B-cells-CD21pos_infection_Up
GO Biological Processes	19	GO:0050679	positive regulation of epithelial cell proliferation	19_GO:0048518 positive regulation of biological process	-2.4	3.5	3.6	30182	225	269	7	2.6	0.97	2247|3162|64127|116844|120425|151306|283131	FGF2|HMOX1|NOD2|LRG1|JAML|GPBAR1|NEAT1	-1.3	RNA_Keller_B-cells-CD21pos_infection_Up
GO Biological Processes	19	GO:0003012	muscle system process	19_GO:0032501 multicellular organismal process	-2.4	3.1	3.5	30182	285	269	8	3	1	3162|3753|5997|6261|6641|7273|124093|246329	HMOX1|KCNE1|RGS2|RYR1|SNTB1|TTN|CCDC78|STAC3	-1.3	RNA_Keller_B-cells-CD21pos_infection_Up
GO Biological Processes	19	GO:0048705	skeletal system morphogenesis	19_GO:0032502 developmental process	-2.4	3.5	3.5	30182	226	269	7	2.6	0.97	54|2268|3217|3340|4041|5027|7480	ACP5|FGR|HOXB7|NDST1|LRP5|P2RX7|WNT10B	-1.3	RNA_Keller_B-cells-CD21pos_infection_Up
GO Biological Processes	19	GO:0032732	positive regulation of interleukin-1 production	19_GO:0048518 positive regulation of biological process	-2.4	6.1	4.1	30182	74	269	4	1.5	0.74	4210|5027|64127|115362	MEFV|P2RX7|NOD2|GBP5	-1.3	RNA_Keller_B-cells-CD21pos_infection_Up
GO Biological Processes	19	GO:0060420	regulation of heart growth	19_GO:0040007 growth	-2.4	6.1	4.1	30182	74	269	4	1.5	0.74	1848|2247|5997|221476	DUSP6|FGF2|RGS2|PI16	-1.3	RNA_Keller_B-cells-CD21pos_infection_Up
GO Biological Processes	19	GO:0016311	dephosphorylation	19_GO:0008152 metabolic process	-2.4	3.5	3.5	30182	227	269	7	2.6	0.97	54|1848|5795|8613|11156|81537|128853	ACP5|DUSP6|PTPRJ|PLPP3|PTP4A3|SGPP1|DUSP15	-1.3	RNA_Keller_B-cells-CD21pos_infection_Up
GO Biological Processes	19	GO:1901136	carbohydrate derivative catabolic process	19_GO:0008152 metabolic process	-2.4	3.9	3.7	30182	171	269	6	2.2	0.9	216|1890|2247|2519|5973|26270	ALDH1A1|TYMP|FGF2|FUCA2|RENBP|FBXO6	-1.3	RNA_Keller_B-cells-CD21pos_infection_Up
GO Biological Processes	19	GO:1903532	positive regulation of secretion by cell	19_GO:0051179 localization	-2.3	3.1	3.4	30182	288	269	8	3	1	2268|2696|2867|3134|5027|6659|7273|192683	FGR|GIPR|FFAR2|HLA-F|P2RX7|SOX4|TTN|SCAMP5	-1.3	RNA_Keller_B-cells-CD21pos_infection_Up
GO Biological Processes	19	GO:0007565	female pregnancy	19_GO:0022414 reproductive process	-2.3	3.9	3.6	30182	172	269	6	2.2	0.9	1508|1636|2529|5125|5743|5997	CTSB|ACE|FUT7|PCSK5|PTGS2|RGS2	-1.3	RNA_Keller_B-cells-CD21pos_infection_Up
GO Biological Processes	19	GO:0042058	regulation of epidermal growth factor receptor signaling pathway	19_GO:0023052 signaling	-2.3	6	4.1	30182	75	269	4	1.5	0.74	868|5795|8412|9961	CBLB|PTPRJ|BCAR3|MVP	-1.3	RNA_Keller_B-cells-CD21pos_infection_Up
GO Biological Processes	19	GO:0048662	negative regulation of smooth muscle cell proliferation	19_GO:0048519 negative regulation of biological process	-2.3	6	4.1	30182	75	269	4	1.5	0.74	199|347|1026|3162	AIF1|APOD|CDKN1A|HMOX1	-1.3	RNA_Keller_B-cells-CD21pos_infection_Up
GO Biological Processes	19	GO:0043536	positive regulation of blood vessel endothelial cell migration	19_GO:0040011 locomotion	-2.3	6	4.1	30182	75	269	4	1.5	0.74	2247|3162|5743|10519	FGF2|HMOX1|PTGS2|CIB1	-1.3	RNA_Keller_B-cells-CD21pos_infection_Up
GO Biological Processes	19	GO:0002724	regulation of T cell cytokine production	19_GO:0002376 immune system process	-2.3	8.9	4.6	30182	38	269	3	1.1	0.64	3134|7133|30009	HLA-F|TNFRSF1B|TBX21	-1.3	RNA_Keller_B-cells-CD21pos_infection_Up
KEGG Pathway	24	hsa05330	Allograft rejection		-2.3	8.9	4.6	30182	38	269	3	1.1	0.64	355|3107|3134	FAS|HLA-C|HLA-F	-1.3	RNA_Keller_B-cells-CD21pos_infection_Up
GO Biological Processes	19	GO:0014741	negative regulation of muscle hypertrophy	19_GO:0048519 negative regulation of biological process	-2.3	8.9	4.6	30182	38	269	3	1.1	0.64	5997|7133|221476	RGS2|TNFRSF1B|PI16	-1.3	RNA_Keller_B-cells-CD21pos_infection_Up
GO Biological Processes	19	GO:0030217	T cell differentiation	19_GO:0002376 immune system process	-2.3	3.9	3.6	30182	173	269	6	2.2	0.9	925|2529|6659|7480|10312|30009	CD8A|FUT7|SOX4|WNT10B|TCIRG1|TBX21	-1.3	RNA_Keller_B-cells-CD21pos_infection_Up
GO Biological Processes	19	GO:0001558	regulation of cell growth	19_GO:0040007 growth	-2.3	2.7	3.3	30182	420	269	10	3.7	1.2	1026|1031|5795|5997|8482|8751|10519|57699|65078|221476	CDKN1A|CDKN2C|PTPRJ|RGS2|SEMA7A|ADAM15|CIB1|CPNE5|RTN4R|PI16	-1.3	RNA_Keller_B-cells-CD21pos_infection_Up
GO Biological Processes	19	GO:0050920	regulation of chemotaxis	19_GO:0040011 locomotion	-2.3	3.4	3.5	30182	230	269	7	2.6	0.97	199|2247|2621|8482|11240|23604|64127	AIF1|FGF2|GAS6|SEMA7A|PADI2|DAPK2|NOD2	-1.3	RNA_Keller_B-cells-CD21pos_infection_Up
GO Biological Processes	19	GO:0071241	cellular response to inorganic substance	19_GO:0050896 response to stimulus	-2.3	3.4	3.5	30182	230	269	7	2.6	0.97	1742|3162|5176|5743|6261|23208|57699	DLG4|HMOX1|SERPINF1|PTGS2|RYR1|SYT11|CPNE5	-1.3	RNA_Keller_B-cells-CD21pos_infection_Up
GO Biological Processes	19	GO:0050772	positive regulation of axonogenesis	19_GO:0032502 developmental process	-2.3	5.9	4.1	30182	76	269	4	1.5	0.74	4135|8482|10154|23654	MAP6|SEMA7A|PLXNC1|PLXNB2	-1.3	RNA_Keller_B-cells-CD21pos_infection_Up
GO Biological Processes	19	GO:0010959	regulation of metal ion transport	19_GO:0051179 localization	-2.3	2.7	3.2	30182	423	269	10	3.7	1.2	1636|3280|3753|3958|5027|5743|5957|10288|150094|246329	ACE|HES1|KCNE1|LGALS3|P2RX7|PTGS2|RCVRN|LILRB2|SIK1|STAC3	-1.3	RNA_Keller_B-cells-CD21pos_infection_Up
KEGG Pathway	24	hsa05171	Coronavirus disease - COVID-19		-2.3	3.4	3.5	30182	232	269	7	2.6	0.97	716|1636|1675|2212|4938|4940|6772	C1S|ACE|CFD|FCGR2A|OAS1|OAS3|STAT1	-1.3	RNA_Keller_B-cells-CD21pos_infection_Up
GO Biological Processes	19	GO:0071901	negative regulation of protein serine/threonine kinase activity	19_GO:0048519 negative regulation of biological process	-2.3	4.6	3.8	30182	123	269	5	1.9	0.82	1026|1031|4041|5795|5997	CDKN1A|CDKN2C|LRP5|PTPRJ|RGS2	-1.3	RNA_Keller_B-cells-CD21pos_infection_Up
KEGG Pathway	24	hsa05140	Leishmaniasis		-2.3	5.8	4	30182	77	269	4	1.5	0.74	2212|5743|6772|9103	FCGR2A|PTGS2|STAT1|FCGR2C	-1.3	RNA_Keller_B-cells-CD21pos_infection_Up
GO Biological Processes	19	GO:0019320	hexose catabolic process	19_GO:0008152 metabolic process	-2.3	8.6	4.5	30182	39	269	3	1.1	0.64	2529|3101|4041	FUT7|HK3|LRP5	-1.3	RNA_Keller_B-cells-CD21pos_infection_Up
Reactome Gene Sets	6	R-HSA-71387	Metabolism of carbohydrates		-2.3	3	3.3	30182	295	269	8	3	1	216|2529|3101|3340|5836|8704|9672|219855	ALDH1A1|FUT7|HK3|NDST1|PYGL|B4GALT2|SDC3|SLC37A2	-1.3	RNA_Keller_B-cells-CD21pos_infection_Up
GO Biological Processes	19	GO:0050807	regulation of synapse organization	19_GO:0050789 regulation of biological process	-2.3	3.4	3.4	30182	234	269	7	2.6	0.97	2049|3587|8321|9231|10154|10288|51225	EPHB3|IL10RA|FZD1|DLG5|PLXNC1|LILRB2|ABI3	-1.3	RNA_Keller_B-cells-CD21pos_infection_Up
GO Biological Processes	19	GO:2000116	regulation of cysteine-type endopeptidase activity	19_GO:0008152 metabolic process	-2.3	3.4	3.4	30182	234	269	7	2.6	0.97	355|843|2621|4210|5698|5743|27113	FAS|CASP10|GAS6|MEFV|PSMB9|PTGS2|BBC3	-1.3	RNA_Keller_B-cells-CD21pos_infection_Up
GO Biological Processes	19	GO:0002460	adaptive immune response based on somatic recombination of immune receptors built from immunoglobulin superfamily domains	19_GO:0002376 immune system process	-2.3	3.8	3.5	30182	177	269	6	2.2	0.9	716|925|5027|10148|10312|30009	C1S|CD8A|P2RX7|EBI3|TCIRG1|TBX21	-1.3	RNA_Keller_B-cells-CD21pos_infection_Up
GO Biological Processes	19	GO:0072676	lymphocyte migration	19_GO:0002376 immune system process	-2.3	5.8	4	30182	78	269	4	1.5	0.74	2529|2621|30009|124976	FUT7|GAS6|TBX21|SPNS2	-1.3	RNA_Keller_B-cells-CD21pos_infection_Up
KEGG Pathway	24	hsa04612	Antigen processing and presentation		-2.3	5.8	4	30182	78	269	4	1.5	0.74	925|1508|3107|3134	CD8A|CTSB|HLA-C|HLA-F	-1.3	RNA_Keller_B-cells-CD21pos_infection_Up
GO Biological Processes	19	GO:1900015	regulation of cytokine production involved in inflammatory response	19_GO:0032501 multicellular organismal process	-2.3	5.8	4	30182	78	269	4	1.5	0.74	347|4210|64127|115362	APOD|MEFV|NOD2|GBP5	-1.3	RNA_Keller_B-cells-CD21pos_infection_Up
GO Biological Processes	19	GO:0002286	T cell activation involved in immune response	19_GO:0002376 immune system process	-2.3	5.8	4	30182	78	269	4	1.5	0.74	911|6556|10875|30009	CD1C|SLC11A1|FGL2|TBX21	-1.3	RNA_Keller_B-cells-CD21pos_infection_Up
GO Biological Processes	19	GO:0031018	endocrine pancreas development	19_GO:0032502 developmental process	-2.3	8.4	4.5	30182	40	269	3	1.1	0.64	2696|3280|6659	GIPR|HES1|SOX4	-1.2	RNA_Keller_B-cells-CD21pos_infection_Up
Canonical Pathways	11	M19	PID P73PATHWAY		-2.3	5.7	4	30182	79	269	4	1.5	0.74	355|1026|5265|27113	FAS|CDKN1A|SERPINA1|BBC3	-1.2	RNA_Keller_B-cells-CD21pos_infection_Up
GO Biological Processes	19	GO:0050688	regulation of defense response to virus	19_GO:0044419 biological process involved in interspecies interaction between organisms	-2.3	5.7	4	30182	79	269	4	1.5	0.74	6772|10875|23547|83666	STAT1|FGL2|LILRA4|PARP9	-1.2	RNA_Keller_B-cells-CD21pos_infection_Up
GO Biological Processes	19	GO:0002688	regulation of leukocyte chemotaxis	19_GO:0040011 locomotion	-2.3	4.5	3.7	30182	126	269	5	1.9	0.82	199|2621|11240|23604|64127	AIF1|GAS6|PADI2|DAPK2|NOD2	-1.2	RNA_Keller_B-cells-CD21pos_infection_Up
GO Biological Processes	19	GO:0043087	regulation of GTPase activity	19_GO:0065007 biological regulation	-2.2	2.8	3.2	30182	364	269	9	3.3	1.1	868|2049|8412|10125|10154|11033|23654|65078|116988	CBLB|EPHB3|BCAR3|RASGRP1|PLXNC1|ADAP1|PLXNB2|RTN4R|AGAP3	-1.2	RNA_Keller_B-cells-CD21pos_infection_Up
GO Biological Processes	19	GO:0031175	neuron projection development	19_GO:0032502 developmental process	-2.2	2.3	3.1	30182	647	269	13	4.8	1.3	347|1742|2049|3280|4135|7940|8482|8522|10129|10154|23654|65078|91653	APOD|DLG4|EPHB3|HES1|MAP6|LST1|SEMA7A|GAS7|FRY|PLXNC1|PLXNB2|RTN4R|BOC	-1.2	RNA_Keller_B-cells-CD21pos_infection_Up
GO Biological Processes	19	GO:0090049	regulation of cell migration involved in sprouting angiogenesis	19_GO:0040011 locomotion	-2.2	5.6	3.9	30182	80	269	4	1.5	0.74	2247|3162|5743|10519	FGF2|HMOX1|PTGS2|CIB1	-1.2	RNA_Keller_B-cells-CD21pos_infection_Up
Reactome Gene Sets	6	R-HSA-1169410	Antiviral mechanism by IFN-stimulated genes		-2.2	5.6	3.9	30182	80	269	4	1.5	0.74	4938|4940|6772|9246	OAS1|OAS3|STAT1|UBE2L6	-1.2	RNA_Keller_B-cells-CD21pos_infection_Up
GO Biological Processes	19	GO:0150077	regulation of neuroinflammatory response	19_GO:0050896 response to stimulus	-2.2	8.2	4.4	30182	41	269	3	1.1	0.64	5743|7133|23208	PTGS2|TNFRSF1B|SYT11	-1.2	RNA_Keller_B-cells-CD21pos_infection_Up
GO Biological Processes	19	GO:0007566	embryo implantation	19_GO:0022414 reproductive process	-2.2	8.2	4.4	30182	41	269	3	1.1	0.64	2529|5125|5743	FUT7|PCSK5|PTGS2	-1.2	RNA_Keller_B-cells-CD21pos_infection_Up
KEGG Pathway	24	hsa05219	Bladder cancer		-2.2	8.2	4.4	30182	41	269	3	1.1	0.64	1026|1890|23604	CDKN1A|TYMP|DAPK2	-1.2	RNA_Keller_B-cells-CD21pos_infection_Up
GO Biological Processes	19	GO:0071526	semaphorin-plexin signaling pathway	19_GO:0023052 signaling	-2.2	8.2	4.4	30182	41	269	3	1.1	0.64	8482|10154|23654	SEMA7A|PLXNC1|PLXNB2	-1.2	RNA_Keller_B-cells-CD21pos_infection_Up
Canonical Pathways	11	M159	PID AMB2 NEUTROPHILS PATHWAY		-2.2	8.2	4.4	30182	41	269	3	1.1	0.64	2268|3055|7525	FGR|HCK|YES1	-1.2	RNA_Keller_B-cells-CD21pos_infection_Up
GO Biological Processes	19	GO:0050803	regulation of synapse structure or activity	19_GO:0065007 biological regulation	-2.2	3.3	3.4	30182	240	269	7	2.6	0.97	2049|3587|8321|9231|10154|10288|51225	EPHB3|IL10RA|FZD1|DLG5|PLXNC1|LILRB2|ABI3	-1.2	RNA_Keller_B-cells-CD21pos_infection_Up
GO Biological Processes	19	GO:0032874	positive regulation of stress-activated MAPK cascade	19_GO:0023052 signaling	-2.2	4.3	3.6	30182	129	269	5	1.9	0.82	4055|5345|10125|64127|285613	LTBR|SERPINF2|RASGRP1|NOD2|RELL2	-1.2	RNA_Keller_B-cells-CD21pos_infection_Up
KEGG Pathway	24	hsa05332	Graft-versus-host disease		-2.2	8	4.3	30182	42	269	3	1.1	0.64	355|3107|3134	FAS|HLA-C|HLA-F	-1.2	RNA_Keller_B-cells-CD21pos_infection_Up
GO Biological Processes	19	GO:0010453	regulation of cell fate commitment	19_GO:0032502 developmental process	-2.2	8	4.3	30182	42	269	3	1.1	0.64	2247|3280|30009	FGF2|HES1|TBX21	-1.2	RNA_Keller_B-cells-CD21pos_infection_Up
GO Biological Processes	19	GO:0060338	regulation of type I interferon-mediated signaling pathway	19_GO:0044419 biological process involved in interspecies interaction between organisms	-2.2	8	4.3	30182	42	269	3	1.1	0.64	4938|4940|84166	OAS1|OAS3|NLRC5	-1.2	RNA_Keller_B-cells-CD21pos_infection_Up
GO Biological Processes	19	GO:0043551	regulation of phosphatidylinositol 3-kinase activity	19_GO:0008152 metabolic process	-2.2	8	4.3	30182	42	269	3	1.1	0.64	2247|2268|64127	FGF2|FGR|NOD2	-1.2	RNA_Keller_B-cells-CD21pos_infection_Up
KEGG Pathway	24	hsa04662	B cell receptor signaling pathway		-2.2	5.5	3.8	30182	82	269	4	1.5	0.74	10288|11024|23547|79168	LILRB2|LILRA1|LILRA4|LILRA6	-1.2	RNA_Keller_B-cells-CD21pos_infection_Up
GO Biological Processes	19	GO:1901184	regulation of ERBB signaling pathway	19_GO:0023052 signaling	-2.2	5.5	3.8	30182	82	269	4	1.5	0.74	868|5795|8412|9961	CBLB|PTPRJ|BCAR3|MVP	-1.2	RNA_Keller_B-cells-CD21pos_infection_Up
GO Biological Processes	19	GO:0050864	regulation of B cell activation	19_GO:0002376 immune system process	-2.2	4.3	3.6	30182	130	269	5	1.9	0.82	1026|9473|23495|30009|64127	CDKN1A|THEMIS2|TNFRSF13B|TBX21|NOD2	-1.2	RNA_Keller_B-cells-CD21pos_infection_Up
GO Biological Processes	19	GO:0070304	positive regulation of stress-activated protein kinase signaling cascade	19_GO:0023052 signaling	-2.2	4.3	3.6	30182	131	269	5	1.9	0.82	4055|5345|10125|64127|285613	LTBR|SERPINF2|RASGRP1|NOD2|RELL2	-1.2	RNA_Keller_B-cells-CD21pos_infection_Up
GO Biological Processes	19	GO:0010595	positive regulation of endothelial cell migration	19_GO:0040011 locomotion	-2.2	4.3	3.6	30182	131	269	5	1.9	0.82	2247|3162|5743|8613|10519	FGF2|HMOX1|PTGS2|PLPP3|CIB1	-1.2	RNA_Keller_B-cells-CD21pos_infection_Up
GO Biological Processes	19	GO:0031331	positive regulation of cellular catabolic process	19_GO:0048518 positive regulation of biological process	-2.2	2.5	3.1	30182	441	269	10	3.7	1.2	20|3162|4210|4343|5027|7133|64127|94103|285180|440823	ABCA2|HMOX1|MEFV|MOV10|P2RX7|TNFRSF1B|NOD2|ORMDL3|RUFY4|MIAT	-1.2	RNA_Keller_B-cells-CD21pos_infection_Up
GO Biological Processes	19	GO:0048713	regulation of oligodendrocyte differentiation	19_GO:0032502 developmental process	-2.2	7.8	4.2	30182	43	269	3	1.1	0.64	3280|7133|128853	HES1|TNFRSF1B|DUSP15	-1.2	RNA_Keller_B-cells-CD21pos_infection_Up
Reactome Gene Sets	6	R-HSA-1433557	Signaling by SCF-KIT		-2.2	7.8	4.2	30182	43	269	3	1.1	0.64	2242|6772|7525	FES|STAT1|YES1	-1.2	RNA_Keller_B-cells-CD21pos_infection_Up
KEGG Pathway	24	hsa04940	Type I diabetes mellitus		-2.2	7.8	4.2	30182	43	269	3	1.1	0.64	355|3107|3134	FAS|HLA-C|HLA-F	-1.2	RNA_Keller_B-cells-CD21pos_infection_Up
GO Biological Processes	19	GO:0060412	ventricular septum morphogenesis	19_GO:0032502 developmental process	-2.2	7.8	4.2	30182	43	269	3	1.1	0.64	3280|6659|8321	HES1|SOX4|FZD1	-1.2	RNA_Keller_B-cells-CD21pos_infection_Up
GO Biological Processes	19	GO:0050881	musculoskeletal movement	19_GO:0032501 multicellular organismal process	-2.2	7.8	4.2	30182	43	269	3	1.1	0.64	2055|124093|246329	CLN8|CCDC78|STAC3	-1.2	RNA_Keller_B-cells-CD21pos_infection_Up
GO Biological Processes	19	GO:0046849	bone remodeling	19_GO:0032501 multicellular organismal process	-2.2	7.8	4.2	30182	43	269	3	1.1	0.64	54|4041|10312	ACP5|LRP5|TCIRG1	-1.2	RNA_Keller_B-cells-CD21pos_infection_Up
GO Biological Processes	19	GO:0032689	negative regulation of type II interferon production	19_GO:0048519 negative regulation of biological process	-2.2	7.8	4.2	30182	43	269	3	1.1	0.64	2621|10225|64127	GAS6|CD96|NOD2	-1.2	RNA_Keller_B-cells-CD21pos_infection_Up
GO Biological Processes	19	GO:0046365	monosaccharide catabolic process	19_GO:0008152 metabolic process	-2.2	7.8	4.2	30182	43	269	3	1.1	0.64	2529|3101|4041	FUT7|HK3|LRP5	-1.2	RNA_Keller_B-cells-CD21pos_infection_Up
Canonical Pathways	11	M195	PID CMYB PATHWAY		-2.2	5.3	3.8	30182	84	269	4	1.5	0.74	1026|3280|5743|22797	CDKN1A|HES1|PTGS2|TFEC	-1.2	RNA_Keller_B-cells-CD21pos_infection_Up
GO Biological Processes	19	GO:0032989	cellular component morphogenesis	19_GO:0032502 developmental process	-2.2	2.3	3	30182	590	269	12	4.5	1.3	20|1742|2049|4135|7273|8482|8522|10154|23654|57082|65078|91653	ABCA2|DLG4|EPHB3|MAP6|TTN|SEMA7A|GAS7|PLXNC1|PLXNB2|KNL1|RTN4R|BOC	-1.2	RNA_Keller_B-cells-CD21pos_infection_Up
GO Biological Processes	19	GO:0051602	response to electrical stimulus	19_GO:0050896 response to stimulus	-2.1	7.7	4.2	30182	44	269	3	1.1	0.64	199|5027|5064	AIF1|P2RX7|PALM	-1.2	RNA_Keller_B-cells-CD21pos_infection_Up
GO Biological Processes	19	GO:0002753	cytosolic pattern recognition receptor signaling pathway	19_GO:0044419 biological process involved in interspecies interaction between organisms	-2.1	7.7	4.2	30182	44	269	3	1.1	0.64	4938|4940|64127	OAS1|OAS3|NOD2	-1.2	RNA_Keller_B-cells-CD21pos_infection_Up
GO Biological Processes	19	GO:0021762	substantia nigra development	19_GO:0032502 developmental process	-2.1	7.7	4.2	30182	44	269	3	1.1	0.64	2247|9143|11240	FGF2|SYNGR3|PADI2	-1.2	RNA_Keller_B-cells-CD21pos_infection_Up
GO Biological Processes	19	GO:0050879	multicellular organismal movement	19_GO:0032501 multicellular organismal process	-2.1	7.7	4.2	30182	44	269	3	1.1	0.64	2055|124093|246329	CLN8|CCDC78|STAC3	-1.2	RNA_Keller_B-cells-CD21pos_infection_Up
Reactome Gene Sets	6	R-HSA-5633008	TP53 Regulates Transcription of Cell Death Genes		-2.1	7.7	4.2	30182	44	269	3	1.1	0.64	355|843|27113	FAS|CASP10|BBC3	-1.2	RNA_Keller_B-cells-CD21pos_infection_Up
GO Biological Processes	19	GO:0001656	metanephros development	19_GO:0032502 developmental process	-2.1	5.3	3.7	30182	85	269	4	1.5	0.74	3280|5455|6772|9231	HES1|POU3F3|STAT1|DLG5	-1.2	RNA_Keller_B-cells-CD21pos_infection_Up
GO Biological Processes	19	GO:0009743	response to carbohydrate	19_GO:0050896 response to stimulus	-2.1	3.6	3.4	30182	189	269	6	2.2	0.9	1636|2621|2696|5176|5743|6659	ACE|GAS6|GIPR|SERPINF1|PTGS2|SOX4	-1.2	RNA_Keller_B-cells-CD21pos_infection_Up
GO Biological Processes	19	GO:0042063	gliogenesis	19_GO:0032502 developmental process	-2.1	3.2	3.2	30182	249	269	7	2.6	0.97	20|1031|2247|3280|6659|8613|9289	ABCA2|CDKN2C|FGF2|HES1|SOX4|PLPP3|ADGRG1	-1.1	RNA_Keller_B-cells-CD21pos_infection_Up
Reactome Gene Sets	6	R-HSA-2029480	Fcgamma receptor (FCGR) dependent phagocytosis		-2.1	5.2	3.7	30182	86	269	4	1.5	0.74	2212|2268|3055|7525	FCGR2A|FGR|HCK|YES1	-1.1	RNA_Keller_B-cells-CD21pos_infection_Up
GO Biological Processes	19	GO:0061326	renal tubule development	19_GO:0032502 developmental process	-2.1	5.2	3.7	30182	86	269	4	1.5	0.74	2247|3280|5455|6772	FGF2|HES1|POU3F3|STAT1	-1.1	RNA_Keller_B-cells-CD21pos_infection_Up
GO Biological Processes	19	GO:0071333	cellular response to glucose stimulus	19_GO:0042592 homeostatic process	-2.1	5.2	3.7	30182	86	269	4	1.5	0.74	1636|2621|5176|6659	ACE|GAS6|SERPINF1|SOX4	-1.1	RNA_Keller_B-cells-CD21pos_infection_Up
GO Biological Processes	19	GO:0090276	regulation of peptide hormone secretion	19_GO:0051179 localization	-2.1	3.5	3.3	30182	191	269	6	2.2	0.9	2696|2867|3767|4041|6659|10312	GIPR|FFAR2|KCNJ11|LRP5|SOX4|TCIRG1	-1.1	RNA_Keller_B-cells-CD21pos_infection_Up
GO Biological Processes	19	GO:0061098	positive regulation of protein tyrosine kinase activity	19_GO:0048518 positive regulation of biological process	-2.1	7.5	4.1	30182	45	269	3	1.1	0.64	1636|1742|2621	ACE|DLG4|GAS6	-1.1	RNA_Keller_B-cells-CD21pos_infection_Up
Canonical Pathways	11	M60	PID NFAT TFPATHWAY		-2.1	7.5	4.1	30182	45	269	3	1.1	0.64	868|5743|30009	CBLB|PTGS2|TBX21	-1.1	RNA_Keller_B-cells-CD21pos_infection_Up
GO Biological Processes	19	GO:1903307	positive regulation of regulated secretory pathway	19_GO:0051179 localization	-2.1	7.5	4.1	30182	45	269	3	1.1	0.64	2268|3134|192683	FGR|HLA-F|SCAMP5	-1.1	RNA_Keller_B-cells-CD21pos_infection_Up
GO Biological Processes	19	GO:0003044	regulation of systemic arterial blood pressure mediated by a chemical signal	19_GO:0032501 multicellular organismal process	-2.1	7.5	4.1	30182	45	269	3	1.1	0.64	1636|5125|5345	ACE|PCSK5|SERPINF2	-1.1	RNA_Keller_B-cells-CD21pos_infection_Up
GO Biological Processes	19	GO:1902622	regulation of neutrophil migration	19_GO:0040011 locomotion	-2.1	7.5	4.1	30182	45	269	3	1.1	0.64	2529|23604|64127	FUT7|DAPK2|NOD2	-1.1	RNA_Keller_B-cells-CD21pos_infection_Up
GO Biological Processes	19	GO:0002009	morphogenesis of an epithelium	19_GO:0032502 developmental process	-2.1	2.5	3	30182	451	269	10	3.7	1.2	2247|3280|4041|6659|7041|8321|9021|9231|23654|116844	FGF2|HES1|LRP5|SOX4|TGFB1I1|FZD1|SOCS3|DLG5|PLXNB2|LRG1	-1.1	RNA_Keller_B-cells-CD21pos_infection_Up
GO Biological Processes	19	GO:0031668	cellular response to extracellular stimulus	19_GO:0050896 response to stimulus	-2.1	3.1	3.2	30182	252	269	7	2.6	0.97	199|355|1026|2242|2621|3162|5027	AIF1|FAS|CDKN1A|FES|GAS6|HMOX1|P2RX7	-1.1	RNA_Keller_B-cells-CD21pos_infection_Up
GO Biological Processes	19	GO:0010001	glial cell differentiation	19_GO:0032502 developmental process	-2.1	3.5	3.3	30182	192	269	6	2.2	0.9	20|1031|2247|3280|6659|8613	ABCA2|CDKN2C|FGF2|HES1|SOX4|PLPP3	-1.1	RNA_Keller_B-cells-CD21pos_infection_Up
GO Biological Processes	19	GO:0044703	multi-organism reproductive process	19_GO:0022414 reproductive process	-2.1	3.5	3.3	30182	192	269	6	2.2	0.9	1508|1636|2529|5125|5743|5997	CTSB|ACE|FUT7|PCSK5|PTGS2|RGS2	-1.1	RNA_Keller_B-cells-CD21pos_infection_Up
Reactome Gene Sets	6	R-HSA-9006934	Signaling by Receptor Tyrosine Kinases		-2.1	2.4	3	30182	524	269	11	4.1	1.2	1299|1742|1848|2242|2247|5125|5795|6772|7525|10312|11033	COL9A3|DLG4|DUSP6|FES|FGF2|PCSK5|PTPRJ|STAT1|YES1|TCIRG1|ADAP1	-1.1	RNA_Keller_B-cells-CD21pos_infection_Up
GO Biological Processes	19	GO:0001649	osteoblast differentiation	19_GO:0032502 developmental process	-2.1	4.1	3.4	30182	137	269	5	1.9	0.82	2247|4041|7480|8321|8482	FGF2|LRP5|WNT10B|FZD1|SEMA7A	-1.1	RNA_Keller_B-cells-CD21pos_infection_Up
GO Biological Processes	19	GO:0032872	regulation of stress-activated MAPK cascade	19_GO:0023052 signaling	-2.1	3.5	3.3	30182	193	269	6	2.2	0.9	355|4055|5345|10125|64127|285613	FAS|LTBR|SERPINF2|RASGRP1|NOD2|RELL2	-1.1	RNA_Keller_B-cells-CD21pos_infection_Up
GO Biological Processes	19	GO:0043269	regulation of monoatomic ion transport	19_GO:0051179 localization	-2.1	2.2	2.9	30182	599	269	12	4.5	1.3	1636|3280|3753|3767|3958|5027|5743|5957|10288|10312|150094|246329	ACE|HES1|KCNE1|KCNJ11|LGALS3|P2RX7|PTGS2|RCVRN|LILRB2|TCIRG1|SIK1|STAC3	-1.1	RNA_Keller_B-cells-CD21pos_infection_Up
KEGG Pathway	24	hsa04930	Type II diabetes mellitus		-2.1	7.3	4.1	30182	46	269	3	1.1	0.64	3101|3767|9021	HK3|KCNJ11|SOCS3	-1.1	RNA_Keller_B-cells-CD21pos_infection_Up
GO Biological Processes	19	GO:0060976	coronary vasculature development	19_GO:0032502 developmental process	-2.1	7.3	4.1	30182	46	269	3	1.1	0.64	1636|2247|3340	ACE|FGF2|NDST1	-1.1	RNA_Keller_B-cells-CD21pos_infection_Up
GO Biological Processes	19	GO:0050918	positive chemotaxis	19_GO:0040011 locomotion	-2.1	7.3	4.1	30182	46	269	3	1.1	0.64	2247|3958|5795	FGF2|LGALS3|PTPRJ	-1.1	RNA_Keller_B-cells-CD21pos_infection_Up
GO Biological Processes	19	GO:0071331	cellular response to hexose stimulus	19_GO:0050896 response to stimulus	-2.1	5.1	3.7	30182	88	269	4	1.5	0.74	1636|2621|5176|6659	ACE|GAS6|SERPINF1|SOX4	-1.1	RNA_Keller_B-cells-CD21pos_infection_Up
GO Biological Processes	19	GO:0002791	regulation of peptide secretion	19_GO:0051179 localization	-2.1	3.5	3.3	30182	194	269	6	2.2	0.9	2696|2867|3767|4041|6659|10312	GIPR|FFAR2|KCNJ11|LRP5|SOX4|TCIRG1	-1.1	RNA_Keller_B-cells-CD21pos_infection_Up
GO Biological Processes	19	GO:0017157	regulation of exocytosis	19_GO:0051179 localization	-2.1	3.5	3.3	30182	194	269	6	2.2	0.9	2242|2268|3134|3162|23208|192683	FES|FGR|HLA-F|HMOX1|SYT11|SCAMP5	-1.1	RNA_Keller_B-cells-CD21pos_infection_Up
GO Biological Processes	19	GO:0006066	alcohol metabolic process	19_GO:0008152 metabolic process	-2.1	2.8	3.1	30182	319	269	8	3	1	20|216|2055|2247|4041|8613|10170|81537	ABCA2|ALDH1A1|CLN8|FGF2|LRP5|PLPP3|DHRS9|SGPP1	-1.1	RNA_Keller_B-cells-CD21pos_infection_Up
GO Biological Processes	19	GO:0031345	negative regulation of cell projection organization	19_GO:0048519 negative regulation of biological process	-2.1	3.5	3.3	30182	195	269	6	2.2	0.9	3280|8482|10519|51225|65078|348110	HES1|SEMA7A|CIB1|ABI3|RTN4R|ARPIN	-1.1	RNA_Keller_B-cells-CD21pos_infection_Up
GO Biological Processes	19	GO:0031334	positive regulation of protein-containing complex assembly	19_GO:0048518 positive regulation of biological process	-2.1	3.5	3.3	30182	195	269	6	2.2	0.9	2242|3055|3958|7453|7480|115362	FES|HCK|LGALS3|WARS1|WNT10B|GBP5	-1.1	RNA_Keller_B-cells-CD21pos_infection_Up
GO Biological Processes	19	GO:0051591	response to cAMP	19_GO:0050896 response to stimulus	-2.1	5	3.6	30182	89	269	4	1.5	0.74	366|3753|6772|7480	AQP9|KCNE1|STAT1|WNT10B	-1.1	RNA_Keller_B-cells-CD21pos_infection_Up
GO Biological Processes	19	GO:0002366	leukocyte activation involved in immune response	19_GO:0002376 immune system process	-2.1	3.4	3.2	30182	196	269	6	2.2	0.9	911|6556|8291|10125|10875|30009	CD1C|SLC11A1|DYSF|RASGRP1|FGL2|TBX21	-1.1	RNA_Keller_B-cells-CD21pos_infection_Up
GO Biological Processes	19	GO:0070302	regulation of stress-activated protein kinase signaling cascade	19_GO:0023052 signaling	-2.1	3.4	3.2	30182	196	269	6	2.2	0.9	355|4055|5345|10125|64127|285613	FAS|LTBR|SERPINF2|RASGRP1|NOD2|RELL2	-1.1	RNA_Keller_B-cells-CD21pos_infection_Up
GO Biological Processes	19	GO:0090087	regulation of peptide transport	19_GO:0051179 localization	-2.1	3.4	3.2	30182	196	269	6	2.2	0.9	2696|2867|3767|4041|6659|10312	GIPR|FFAR2|KCNJ11|LRP5|SOX4|TCIRG1	-1.1	RNA_Keller_B-cells-CD21pos_infection_Up
Reactome Gene Sets	6	R-HSA-6783783	Interleukin-10 signaling		-2.1	7.2	4	30182	47	269	3	1.1	0.64	3587|5743|7133	IL10RA|PTGS2|TNFRSF1B	-1.1	RNA_Keller_B-cells-CD21pos_infection_Up
Canonical Pathways	11	M183	PID IL6 7 PATHWAY		-2.1	7.2	4	30182	47	269	3	1.1	0.64	3055|6772|9021	HCK|STAT1|SOCS3	-1.1	RNA_Keller_B-cells-CD21pos_infection_Up
GO Biological Processes	19	GO:0061005	cell differentiation involved in kidney development	19_GO:0032502 developmental process	-2.1	7.2	4	30182	47	269	3	1.1	0.64	3280|5455|6772	HES1|POU3F3|STAT1	-1.1	RNA_Keller_B-cells-CD21pos_infection_Up
GO Biological Processes	19	GO:0071715	icosanoid transport	19_GO:0051179 localization	-2.1	7.2	4	30182	47	269	3	1.1	0.64	1636|5027|5743	ACE|P2RX7|PTGS2	-1.1	RNA_Keller_B-cells-CD21pos_infection_Up
GO Biological Processes	19	GO:0008584	male gonad development	19_GO:0022414 reproductive process	-2.1	4	3.4	30182	140	269	5	1.9	0.82	1636|3753|8751|9289|9985	ACE|KCNE1|ADAM15|ADGRG1|REC8	-1.1	RNA_Keller_B-cells-CD21pos_infection_Up
GO Biological Processes	19	GO:0043271	negative regulation of monoatomic ion transport	19_GO:0051179 localization	-2.1	4	3.4	30182	140	269	5	1.9	0.82	1636|3280|3753|5743|10288	ACE|HES1|KCNE1|PTGS2|LILRB2	-1.1	RNA_Keller_B-cells-CD21pos_infection_Up
GO Biological Processes	19	GO:0071326	cellular response to monosaccharide stimulus	19_GO:0050896 response to stimulus	-2.1	5	3.6	30182	90	269	4	1.5	0.74	1636|2621|5176|6659	ACE|GAS6|SERPINF1|SOX4	-1.1	RNA_Keller_B-cells-CD21pos_infection_Up
Reactome Gene Sets	6	R-HSA-428157	Sphingolipid metabolism		-2.1	5	3.6	30182	90	269	4	1.5	0.74	8613|81537|94103|124976	PLPP3|SGPP1|ORMDL3|SPNS2	-1.1	RNA_Keller_B-cells-CD21pos_infection_Up
GO Biological Processes	19	GO:0046546	development of primary male sexual characteristics	19_GO:0022414 reproductive process	-2.1	4	3.4	30182	141	269	5	1.9	0.82	1636|3753|8751|9289|9985	ACE|KCNE1|ADAM15|ADGRG1|REC8	-1.1	RNA_Keller_B-cells-CD21pos_infection_Up
GO Biological Processes	19	GO:0072091	regulation of stem cell proliferation	19_GO:0050789 regulation of biological process	-2	4.9	3.6	30182	91	269	4	1.5	0.74	1031|1636|2247|7480	CDKN2C|ACE|FGF2|WNT10B	-1.1	RNA_Keller_B-cells-CD21pos_infection_Up
GO Biological Processes	19	GO:0031641	regulation of myelination	19_GO:0032502 developmental process	-2	7	4	30182	48	269	3	1.1	0.64	1890|3687|7133	TYMP|ITGAX|TNFRSF1B	-1.1	RNA_Keller_B-cells-CD21pos_infection_Up
GO Biological Processes	19	GO:0002673	regulation of acute inflammatory response	19_GO:0050896 response to stimulus	-2	7	4	30182	48	269	3	1.1	0.64	2529|2867|5743	FUT7|FFAR2|PTGS2	-1.1	RNA_Keller_B-cells-CD21pos_infection_Up
GO Biological Processes	19	GO:0042269	regulation of natural killer cell mediated cytotoxicity	19_GO:0044419 biological process involved in interspecies interaction between organisms	-2	7	4	30182	48	269	3	1.1	0.64	3134|10125|146850	HLA-F|RASGRP1|PIK3R6	-1.1	RNA_Keller_B-cells-CD21pos_infection_Up
GO Biological Processes	19	GO:0006956	complement activation	19_GO:0002376 immune system process	-2	7	4	30182	48	269	3	1.1	0.64	716|1675|78989	C1S|CFD|COLEC11	-1.1	RNA_Keller_B-cells-CD21pos_infection_Up
GO Biological Processes	19	GO:2000404	regulation of T cell migration	19_GO:0040011 locomotion	-2	7	4	30182	48	269	3	1.1	0.64	199|347|124976	AIF1|APOD|SPNS2	-1.1	RNA_Keller_B-cells-CD21pos_infection_Up
GO Biological Processes	19	GO:0042886	amide transport	19_GO:0051179 localization	-2	4	3.3	30182	142	269	5	1.9	0.82	20|366|5455|55244|81537	ABCA2|AQP9|POU3F3|SLC47A1|SGPP1	-1.1	RNA_Keller_B-cells-CD21pos_infection_Up
GO Biological Processes	19	GO:0035296	regulation of tube diameter	19_GO:0065007 biological regulation	-2	4	3.3	30182	142	269	5	1.9	0.82	1636|5029|5345|5743|5997	ACE|P2RY2|SERPINF2|PTGS2|RGS2	-1.1	RNA_Keller_B-cells-CD21pos_infection_Up
GO Biological Processes	19	GO:0097746	blood vessel diameter maintenance	19_GO:0032501 multicellular organismal process	-2	4	3.3	30182	142	269	5	1.9	0.82	1636|5029|5345|5743|5997	ACE|P2RY2|SERPINF2|PTGS2|RGS2	-1.1	RNA_Keller_B-cells-CD21pos_infection_Up
GO Biological Processes	19	GO:0035150	regulation of tube size	19_GO:0065007 biological regulation	-2	3.9	3.3	30182	143	269	5	1.9	0.82	1636|5029|5345|5743|5997	ACE|P2RY2|SERPINF2|PTGS2|RGS2	-1.1	RNA_Keller_B-cells-CD21pos_infection_Up
GO Biological Processes	19	GO:0002263	cell activation involved in immune response	19_GO:0002376 immune system process	-2	3.4	3.2	30182	200	269	6	2.2	0.9	911|6556|8291|10125|10875|30009	CD1C|SLC11A1|DYSF|RASGRP1|FGL2|TBX21	-1.1	RNA_Keller_B-cells-CD21pos_infection_Up
GO Biological Processes	19	GO:0003333	amino acid transmembrane transport	19_GO:0051179 localization	-2	4.9	3.5	30182	92	269	4	1.5	0.74	2055|6556|55244|123096	CLN8|SLC11A1|SLC47A1|SLC25A29	-1.1	RNA_Keller_B-cells-CD21pos_infection_Up
GO Biological Processes	19	GO:1901214	regulation of neuron death	19_GO:0050789 regulation of biological process	-2	2.7	3	30182	327	269	8	3	1	2055|3134|3162|5176|6620|7133|7786|8321	CLN8|HLA-F|HMOX1|SERPINF1|SNCB|TNFRSF1B|MAP3K12|FZD1	-1.1	RNA_Keller_B-cells-CD21pos_infection_Up
GO Biological Processes	19	GO:0031667	response to nutrient levels	19_GO:0050896 response to stimulus	-2	2.4	2.9	30182	466	269	10	3.7	1.2	355|1026|1636|2242|2621|2696|3162|5743|6772|64127	FAS|CDKN1A|ACE|FES|GAS6|GIPR|HMOX1|PTGS2|STAT1|NOD2	-1.1	RNA_Keller_B-cells-CD21pos_infection_Up
GO Biological Processes	19	GO:0044706	multi-multicellular organism process	19_GO:0032501 multicellular organismal process	-2	3.3	3.2	30182	201	269	6	2.2	0.9	1508|1636|2529|5125|5743|5997	CTSB|ACE|FUT7|PCSK5|PTGS2|RGS2	-1.1	RNA_Keller_B-cells-CD21pos_infection_Up
GO Biological Processes	19	GO:0030900	forebrain development	19_GO:0032502 developmental process	-2	2.6	2.9	30182	396	269	9	3.3	1.1	1742|2049|2247|3280|3340|5455|8482|9289|65078	DLG4|EPHB3|FGF2|HES1|NDST1|POU3F3|SEMA7A|ADGRG1|RTN4R	-1.1	RNA_Keller_B-cells-CD21pos_infection_Up
GO Biological Processes	19	GO:0043114	regulation of vascular permeability	19_GO:0032501 multicellular organismal process	-2	6.9	3.9	30182	49	269	3	1.1	0.64	5795|7525|11156	PTPRJ|YES1|PTP4A3	-1.1	RNA_Keller_B-cells-CD21pos_infection_Up
Canonical Pathways	11	M92	PID ANGIOPOIETIN RECEPTOR PATHWAY		-2	6.9	3.9	30182	49	269	3	1.1	0.64	1026|2242|2247	CDKN1A|FES|FGF2	-1.1	RNA_Keller_B-cells-CD21pos_infection_Up
KEGG Pathway	24	hsa04672	Intestinal immune network for IgA production		-2	6.9	3.9	30182	49	269	3	1.1	0.64	3601|4055|23495	IL15RA|LTBR|TNFRSF13B	-1.1	RNA_Keller_B-cells-CD21pos_infection_Up
GO Biological Processes	19	GO:0048638	regulation of developmental growth	19_GO:0040007 growth	-2	2.7	3	30182	328	269	8	3	1	1026|1848|2247|5997|8482|57699|65078|221476	CDKN1A|DUSP6|FGF2|RGS2|SEMA7A|CPNE5|RTN4R|PI16	-1.1	RNA_Keller_B-cells-CD21pos_infection_Up
GO Biological Processes	19	GO:0009896	positive regulation of catabolic process	19_GO:0048518 positive regulation of biological process	-2	2.3	2.9	30182	540	269	11	4.1	1.2	20|868|3162|4210|4343|5027|7133|64127|94103|285180|440823	ABCA2|CBLB|HMOX1|MEFV|MOV10|P2RX7|TNFRSF1B|NOD2|ORMDL3|RUFY4|MIAT	-1.1	RNA_Keller_B-cells-CD21pos_infection_Up
GO Biological Processes	19	GO:1901615	organic hydroxy compound metabolic process	19_GO:0008152 metabolic process	-2	2.4	2.9	30182	468	269	10	3.7	1.2	20|216|1508|2055|2247|4041|6620|8613|10170|81537	ABCA2|ALDH1A1|CTSB|CLN8|FGF2|LRP5|SNCB|PLPP3|DHRS9|SGPP1	-1.1	RNA_Keller_B-cells-CD21pos_infection_Up
GO Biological Processes	19	GO:0050671	positive regulation of lymphocyte proliferation	19_GO:0002376 immune system process	-2	3.9	3.3	30182	145	269	5	1.9	0.82	199|1026|3280|10148|10288	AIF1|CDKN1A|HES1|EBI3|LILRB2	-1.1	RNA_Keller_B-cells-CD21pos_infection_Up
GO Biological Processes	19	GO:0050714	positive regulation of protein secretion	19_GO:0051179 localization	-2	3.9	3.3	30182	145	269	5	1.9	0.82	2696|2867|5027|6659|7273	GIPR|FFAR2|P2RX7|SOX4|TTN	-1.1	RNA_Keller_B-cells-CD21pos_infection_Up
Reactome Gene Sets	6	R-HSA-6798695	Neutrophil degranulation		-60	28	37	30182	482	110	50	45	4.7	317|383|634|671|820|932|966|967|1088|1116|1432|1509|1511|1667|1669|1991|1992|2040|2821|2896|2934|3043|3240|3934|4057|4069|4317|4332|4353|4680|5273|5836|5873|6036|6037|6279|6280|6286|6590|6947|8895|8993|10321|10562|11031|25801|56729|154664|199675|728358	APAF1|ARG1|CEACAM1|BPI|CAMP|MS4A3|CD59|CD63|CEACAM8|CHI3L1|MAPK14|CTSD|CTSG|DEFA1|DEFA4|ELANE|SERPINB1|STOM|GPI|GRN|GSN|HBB|HP|LCN2|LTF|LYZ|MMP8|MNDA|MPO|CEACAM6|SERPINB10|PYGL|RAB27A|RNASE2|RNASE3|S100A8|S100A9|S100P|SLPI|TCN1|CPNE3|PGLYRP1|CRISP3|OLFM4|RAB31|GCA|RETN|ABCA13|MCEMP1|DEFA1B	-55	RNA_Wilk_B-cells_patient-C6_Up
GO Biological Processes	19	GO:0009617	response to bacterium	19_GO:0044419 biological process involved in interspecies interaction between organisms	-22	11	17	30182	696	110	29	26	4.2	306|383|671|706|820|1053|1432|1511|1667|1668|1669|1991|3240|3934|4057|4069|4353|5836|6037|6279|6280|6590|7494|8993|9636|55603|58484|92140|728358	ANXA3|ARG1|BPI|TSPO|CAMP|CEBPE|MAPK14|CTSG|DEFA1|DEFA3|DEFA4|ELANE|HP|LCN2|LTF|LYZ|MPO|PYGL|RNASE3|S100A8|S100A9|SLPI|XBP1|PGLYRP1|ISG15|TENT5A|NLRC4|MTDH|DEFA1B	-18	RNA_Wilk_B-cells_patient-C6_Up
GO Biological Processes	19	GO:0042742	defense response to bacterium	19_GO:0044419 biological process involved in interspecies interaction between organisms	-21	20	19	30182	294	110	21	19	3.7	306|671|820|1511|1667|1668|1669|1991|3240|3934|4057|4069|4353|6037|6279|6280|6590|8993|9636|58484|728358	ANXA3|BPI|CAMP|CTSG|DEFA1|DEFA3|DEFA4|ELANE|HP|LCN2|LTF|LYZ|MPO|RNASE3|S100A8|S100A9|SLPI|PGLYRP1|ISG15|NLRC4|DEFA1B	-17	RNA_Wilk_B-cells_patient-C6_Up
Reactome Gene Sets	6	R-HSA-6803157	Antimicrobial peptides		-20	43	25	30182	95	110	15	14	3.3	671|820|1511|1667|1668|1669|1991|3934|4057|4069|6037|6279|6280|8993|728358	BPI|CAMP|CTSG|DEFA1|DEFA3|DEFA4|ELANE|LCN2|LTF|LYZ|RNASE3|S100A8|S100A9|PGLYRP1|DEFA1B	-16	RNA_Wilk_B-cells_patient-C6_Up
GO Biological Processes	19	GO:0045087	innate immune response	19_GO:0044419 biological process involved in interspecies interaction between organisms	-19	9.9	15	30182	745	110	27	25	4.1	301|383|671|820|1667|1668|1669|2537|2597|2934|3934|4057|4599|5873|6036|6037|6279|6280|6590|8993|9636|10321|23765|26268|51734|58484|728358	ANXA1|ARG1|BPI|CAMP|DEFA1|DEFA3|DEFA4|IFI6|GAPDH|GSN|LCN2|LTF|MX1|RAB27A|RNASE2|RNASE3|S100A8|S100A9|SLPI|PGLYRP1|ISG15|CRISP3|IL17RA|FBXO9|MSRB1|NLRC4|DEFA1B	-15	RNA_Wilk_B-cells_patient-C6_Up
GO Biological Processes	19	GO:0019730	antimicrobial humoral response	19_GO:0044419 biological process involved in interspecies interaction between organisms	-19	36	23	30182	115	110	15	14	3.3	820|1511|1667|1668|1669|1991|2597|3151|4057|4069|6037|6280|6590|8993|728358	CAMP|CTSG|DEFA1|DEFA3|DEFA4|ELANE|GAPDH|HMGN2|LTF|LYZ|RNASE3|S100A9|SLPI|PGLYRP1|DEFA1B	-15	RNA_Wilk_B-cells_patient-C6_Up
GO Biological Processes	19	GO:0050832	defense response to fungus	19_GO:0044419 biological process involved in interspecies interaction between organisms	-18	65	27	30182	51	110	12	11	3	1511|1667|1668|1669|1991|2597|4057|4353|6279|6280|23765|728358	CTSG|DEFA1|DEFA3|DEFA4|ELANE|GAPDH|LTF|MPO|S100A8|S100A9|IL17RA|DEFA1B	-15	RNA_Wilk_B-cells_patient-C6_Up
GO Biological Processes	19	GO:0009620	response to fungus	19_GO:0044419 biological process involved in interspecies interaction between organisms	-17	53	25	30182	62	110	12	11	3	1511|1667|1668|1669|1991|2597|4057|4353|6279|6280|23765|728358	CTSG|DEFA1|DEFA3|DEFA4|ELANE|GAPDH|LTF|MPO|S100A8|S100A9|IL17RA|DEFA1B	-14	RNA_Wilk_B-cells_patient-C6_Up
GO Biological Processes	19	GO:0061844	antimicrobial humoral immune response mediated by antimicrobial peptide	19_GO:0044419 biological process involved in interspecies interaction between organisms	-16	44	23	30182	74	110	12	11	3	820|1667|1668|1669|1991|2597|3151|4057|6037|6280|8993|728358	CAMP|DEFA1|DEFA3|DEFA4|ELANE|GAPDH|HMGN2|LTF|RNASE3|S100A9|PGLYRP1|DEFA1B	-13	RNA_Wilk_B-cells_patient-C6_Up
GO Biological Processes	19	GO:0006959	humoral immune response	19_GO:0002376 immune system process	-16	20	17	30182	222	110	16	15	3.4	820|1511|1667|1668|1669|1991|2597|2821|3151|4057|4069|6037|6280|6590|8993|728358	CAMP|CTSG|DEFA1|DEFA3|DEFA4|ELANE|GAPDH|GPI|HMGN2|LTF|LYZ|RNASE3|S100A9|SLPI|PGLYRP1|DEFA1B	-13	RNA_Wilk_B-cells_patient-C6_Up
GO Biological Processes	19	GO:0032496	response to lipopolysaccharide	19_GO:0044419 biological process involved in interspecies interaction between organisms	-16	15	15	30182	330	110	18	16	3.5	383|671|706|820|1053|1432|1511|1667|1668|1669|1991|4353|6279|6280|6590|7494|92140|728358	ARG1|BPI|TSPO|CAMP|CEBPE|MAPK14|CTSG|DEFA1|DEFA3|DEFA4|ELANE|MPO|S100A8|S100A9|SLPI|XBP1|MTDH|DEFA1B	-12	RNA_Wilk_B-cells_patient-C6_Up
GO Biological Processes	19	GO:0002237	response to molecule of bacterial origin	19_GO:0044419 biological process involved in interspecies interaction between organisms	-15	14	15	30182	351	110	18	16	3.5	383|671|706|820|1053|1432|1511|1667|1668|1669|1991|4353|6279|6280|6590|7494|92140|728358	ARG1|BPI|TSPO|CAMP|CEBPE|MAPK14|CTSG|DEFA1|DEFA3|DEFA4|ELANE|MPO|S100A8|S100A9|SLPI|XBP1|MTDH|DEFA1B	-12	RNA_Wilk_B-cells_patient-C6_Up
GO Biological Processes	19	GO:0001906	cell killing	19_GO:0009987 cellular process	-14	32	19	30182	104	110	12	11	3	1511|1667|1668|1669|1991|2597|3151|4057|4069|5873|8993|728358	CTSG|DEFA1|DEFA3|DEFA4|ELANE|GAPDH|HMGN2|LTF|LYZ|RAB27A|PGLYRP1|DEFA1B	-11	RNA_Wilk_B-cells_patient-C6_Up
GO Biological Processes	19	GO:0019731	antibacterial humoral response	19_GO:0044419 biological process involved in interspecies interaction between organisms	-14	47	21	30182	58	110	10	9.1	2.7	820|1511|1667|1668|1669|1991|4057|6037|6590|728358	CAMP|CTSG|DEFA1|DEFA3|DEFA4|ELANE|LTF|RNASE3|SLPI|DEFA1B	-11	RNA_Wilk_B-cells_patient-C6_Up
GO Biological Processes	19	GO:0050829	defense response to Gram-negative bacterium	19_GO:0044419 biological process involved in interspecies interaction between organisms	-14	34	19	30182	88	110	11	10	2.9	671|820|1511|1667|1668|1669|1991|4057|4069|6037|728358	BPI|CAMP|CTSG|DEFA1|DEFA3|DEFA4|ELANE|LTF|LYZ|RNASE3|DEFA1B	-11	RNA_Wilk_B-cells_patient-C6_Up
GO Biological Processes	19	GO:0031640	killing of cells of another organism	19_GO:0044419 biological process involved in interspecies interaction between organisms	-14	60	23	30182	41	110	9	8.2	2.6	1667|1668|1669|2597|3151|4057|4069|8993|728358	DEFA1|DEFA3|DEFA4|GAPDH|HMGN2|LTF|LYZ|PGLYRP1|DEFA1B	-10	RNA_Wilk_B-cells_patient-C6_Up
GO Biological Processes	19	GO:0002227	innate immune response in mucosa	19_GO:0044419 biological process involved in interspecies interaction between organisms	-13	78	25	30182	28	110	8	7.3	2.5	820|1667|1668|1669|4057|6036|6037|728358	CAMP|DEFA1|DEFA3|DEFA4|LTF|RNASE2|RNASE3|DEFA1B	-10	RNA_Wilk_B-cells_patient-C6_Up
GO Biological Processes	19	GO:0052547	regulation of peptidase activity	19_GO:0008152 metabolic process	-13	11	13	30182	424	110	17	15	3.4	317|351|1509|1992|2537|2597|2821|2896|2934|4057|5273|6279|6280|6590|8530|25824|58484	APAF1|APP|CTSD|SERPINB1|IFI6|GAPDH|GPI|GRN|GSN|LTF|SERPINB10|S100A8|S100A9|SLPI|CST7|PRDX5|NLRC4	-9.5	RNA_Wilk_B-cells_patient-C6_Up
GO Biological Processes	19	GO:0071216	cellular response to biotic stimulus	19_GO:0050896 response to stimulus	-12	16	14	30182	247	110	14	13	3.2	317|383|671|706|820|1053|1432|1511|1667|1668|1669|7494|92140|728358	APAF1|ARG1|BPI|TSPO|CAMP|CEBPE|MAPK14|CTSG|DEFA1|DEFA3|DEFA4|XBP1|MTDH|DEFA1B	-9.4	RNA_Wilk_B-cells_patient-C6_Up
GO Biological Processes	19	GO:0071222	cellular response to lipopolysaccharide	19_GO:0044419 biological process involved in interspecies interaction between organisms	-12	17	14	30182	207	110	13	12	3.1	383|671|706|820|1053|1432|1511|1667|1668|1669|7494|92140|728358	ARG1|BPI|TSPO|CAMP|CEBPE|MAPK14|CTSG|DEFA1|DEFA3|DEFA4|XBP1|MTDH|DEFA1B	-9.2	RNA_Wilk_B-cells_patient-C6_Up
GO Biological Processes	19	GO:0002385	mucosal immune response	19_GO:0002376 immune system process	-12	59	21	30182	37	110	8	7.3	2.5	820|1667|1668|1669|4057|6036|6037|728358	CAMP|DEFA1|DEFA3|DEFA4|LTF|RNASE2|RNASE3|DEFA1B	-9.1	RNA_Wilk_B-cells_patient-C6_Up
GO Biological Processes	19	GO:0071219	cellular response to molecule of bacterial origin	19_GO:0044419 biological process involved in interspecies interaction between organisms	-12	16	14	30182	220	110	13	12	3.1	383|671|706|820|1053|1432|1511|1667|1668|1669|7494|92140|728358	ARG1|BPI|TSPO|CAMP|CEBPE|MAPK14|CTSG|DEFA1|DEFA3|DEFA4|XBP1|MTDH|DEFA1B	-8.9	RNA_Wilk_B-cells_patient-C6_Up
GO Biological Processes	19	GO:0002251	organ or tissue specific immune response	19_GO:0002376 immune system process	-12	54	20	30182	41	110	8	7.3	2.5	820|1667|1668|1669|4057|6036|6037|728358	CAMP|DEFA1|DEFA3|DEFA4|LTF|RNASE2|RNASE3|DEFA1B	-8.8	RNA_Wilk_B-cells_patient-C6_Up
GO Biological Processes	19	GO:0052548	regulation of endopeptidase activity	19_GO:0008152 metabolic process	-11	11	12	30182	336	110	14	13	3.2	317|1509|1992|2537|2597|2821|2934|4057|5273|6279|6280|8530|25824|58484	APAF1|CTSD|SERPINB1|IFI6|GAPDH|GPI|GSN|LTF|SERPINB10|S100A8|S100A9|CST7|PRDX5|NLRC4	-7.8	RNA_Wilk_B-cells_patient-C6_Up
GO Biological Processes	19	GO:0051873	killing by host of symbiont cells	19_GO:0044419 biological process involved in interspecies interaction between organisms	-9.5	66	20	30182	25	110	6	5.5	2.2	820|1511|1667|1991|2597|728358	CAMP|CTSG|DEFA1|ELANE|GAPDH|DEFA1B	-6.8	RNA_Wilk_B-cells_patient-C6_Up
GO Biological Processes	19	GO:0031347	regulation of defense response	19_GO:0050896 response to stimulus	-9.4	6.4	9.2	30182	767	110	18	16	3.5	241|301|351|383|634|1432|1991|2896|4057|4317|4332|6279|6280|8530|8993|9636|23765|58484	ALOX5AP|ANXA1|APP|ARG1|CEACAM1|MAPK14|ELANE|GRN|LTF|MMP8|MNDA|S100A8|S100A9|CST7|PGLYRP1|ISG15|IL17RA|NLRC4	-6.7	RNA_Wilk_B-cells_patient-C6_Up
GO Biological Processes	19	GO:0050830	defense response to Gram-positive bacterium	19_GO:0044419 biological process involved in interspecies interaction between organisms	-9.3	21	13	30182	118	110	9	8.2	2.6	820|1511|1667|1668|1669|4069|6037|8993|728358	CAMP|CTSG|DEFA1|DEFA3|DEFA4|LYZ|RNASE3|PGLYRP1|DEFA1B	-6.6	RNA_Wilk_B-cells_patient-C6_Up
GO Biological Processes	19	GO:2000116	regulation of cysteine-type endopeptidase activity	19_GO:0008152 metabolic process	-9	13	11	30182	234	110	11	10	2.9	317|1509|2537|2821|2934|4057|6279|6280|8530|25824|58484	APAF1|CTSD|IFI6|GPI|GSN|LTF|S100A8|S100A9|CST7|PRDX5|NLRC4	-6.3	RNA_Wilk_B-cells_patient-C6_Up
GO Biological Processes	19	GO:0030162	regulation of proteolysis	19_GO:0008152 metabolic process	-8.9	6.4	8.9	30182	726	110	17	15	3.4	317|351|1509|1992|2537|2597|2821|2896|2934|4057|5273|6279|6280|6590|8530|25824|58484	APAF1|APP|CTSD|SERPINB1|IFI6|GAPDH|GPI|GRN|GSN|LTF|SERPINB10|S100A8|S100A9|SLPI|CST7|PRDX5|NLRC4	-6.3	RNA_Wilk_B-cells_patient-C6_Up
Reactome Gene Sets	6	R-HSA-6799990	Metal sequestration by antimicrobial proteins		-8.6	180	27	30182	6	110	4	3.6	1.8	3934|4057|6279|6280	LCN2|LTF|S100A8|S100A9	-6	RNA_Wilk_B-cells_patient-C6_Up
GO Biological Processes	19	GO:0009725	response to hormone	19_GO:0050896 response to stimulus	-8.4	5.9	8.5	30182	784	110	17	15	3.4	301|306|383|634|706|952|1432|1667|1668|2821|6272|7357|7494|8660|11031|56729|728358	ANXA1|ANXA3|ARG1|CEACAM1|TSPO|CD38|MAPK14|DEFA1|DEFA3|GPI|SORT1|UGCG|XBP1|IRS2|RAB31|RETN|DEFA1B	-5.9	RNA_Wilk_B-cells_patient-C6_Up
GO Biological Processes	19	GO:0050727	regulation of inflammatory response	19_GO:0050896 response to stimulus	-8.4	8.6	9.4	30182	414	110	13	12	3.1	241|301|351|1432|1991|2896|4317|6279|6280|8530|8993|23765|58484	ALOX5AP|ANXA1|APP|MAPK14|ELANE|GRN|MMP8|S100A8|S100A9|CST7|PGLYRP1|IL17RA|NLRC4	-5.9	RNA_Wilk_B-cells_patient-C6_Up
GO Biological Processes	19	GO:0051346	negative regulation of hydrolase activity	19_GO:0065007 biological regulation	-8.3	9.6	9.7	30182	344	110	12	11	3	301|351|1992|2537|2597|2821|4057|5273|6272|6590|8530|25824	ANXA1|APP|SERPINB1|IFI6|GAPDH|GPI|LTF|SERPINB10|SORT1|SLPI|CST7|PRDX5	-5.8	RNA_Wilk_B-cells_patient-C6_Up
GO Biological Processes	19	GO:0071396	cellular response to lipid	19_GO:0050896 response to stimulus	-8.1	7.3	8.8	30182	527	110	14	13	3.2	301|383|671|706|820|1053|1432|1511|1667|1668|1669|7494|92140|728358	ANXA1|ARG1|BPI|TSPO|CAMP|CEBPE|MAPK14|CTSG|DEFA1|DEFA3|DEFA4|XBP1|MTDH|DEFA1B	-5.6	RNA_Wilk_B-cells_patient-C6_Up
GO Biological Processes	19	GO:0010942	positive regulation of cell death	19_GO:0048518 positive regulation of biological process	-8.1	6.6	8.6	30182	621	110	15	14	3.3	301|317|706|1509|1848|2896|2934|3040|3043|3240|4332|6279|6280|7153|58484	ANXA1|APAF1|TSPO|CTSD|DUSP6|GRN|GSN|HBA2|HBB|HP|MNDA|S100A8|S100A9|TOP2A|NLRC4	-5.6	RNA_Wilk_B-cells_patient-C6_Up
GO Biological Processes	19	GO:0051702	biological process involved in interaction with symbiont	19_GO:0044419 biological process involved in interspecies interaction between organisms	-8	19	12	30182	115	110	8	7.3	2.5	820|1511|1667|1991|2040|2597|4057|728358	CAMP|CTSG|DEFA1|ELANE|STOM|GAPDH|LTF|DEFA1B	-5.5	RNA_Wilk_B-cells_patient-C6_Up
GO Biological Processes	19	GO:0006954	inflammatory response	19_GO:0050896 response to stimulus	-7.9	7.1	8.7	30182	541	110	14	13	3.2	241|301|351|1116|1991|2896|3240|4069|6279|6280|10100|23765|25824|58484	ALOX5AP|ANXA1|APP|CHI3L1|ELANE|GRN|HP|LYZ|S100A8|S100A9|TSPAN2|IL17RA|PRDX5|NLRC4	-5.5	RNA_Wilk_B-cells_patient-C6_Up
Reactome Gene Sets	6	R-HSA-1474244	Extracellular matrix organization		-7.9	10	9.5	30182	300	110	11	10	2.9	87|351|634|1088|1308|1509|1511|1991|4317|4680|5034	ACTN1|APP|CEACAM1|CEACAM8|COL17A1|CTSD|CTSG|ELANE|MMP8|CEACAM6|P4HB	-5.4	RNA_Wilk_B-cells_patient-C6_Up
GO Biological Processes	19	GO:0010466	negative regulation of peptidase activity	19_GO:0048519 negative regulation of biological process	-7.8	12	9.9	30182	235	110	10	9.1	2.7	351|1992|2537|2597|2821|4057|5273|6590|8530|25824	APP|SERPINB1|IFI6|GAPDH|GPI|LTF|SERPINB10|SLPI|CST7|PRDX5	-5.3	RNA_Wilk_B-cells_patient-C6_Up
GO Biological Processes	19	GO:0043086	negative regulation of catalytic activity	19_GO:0065007 biological regulation	-7.7	6.2	8.2	30182	666	110	15	14	3.3	301|351|634|1992|2537|2597|2821|3240|4057|5273|6272|6590|8530|8660|25824	ANXA1|APP|CEACAM1|SERPINB1|IFI6|GAPDH|GPI|HP|LTF|SERPINB10|SORT1|SLPI|CST7|IRS2|PRDX5	-5.3	RNA_Wilk_B-cells_patient-C6_Up
GO Biological Processes	19	GO:0002683	negative regulation of immune system process	19_GO:0002376 immune system process	-7.6	7.3	8.5	30182	487	110	13	12	3.1	301|383|634|671|966|1432|1511|2896|4057|4332|8530|8993|9636	ANXA1|ARG1|CEACAM1|BPI|CD59|MAPK14|CTSG|GRN|LTF|MNDA|CST7|PGLYRP1|ISG15	-5.2	RNA_Wilk_B-cells_patient-C6_Up
Reactome Gene Sets	6	R-HSA-1462054	Alpha-defensins		-7.5	110	21	30182	10	110	4	3.6	1.8	1667|1668|1669|728358	DEFA1|DEFA3|DEFA4|DEFA1B	-5.1	RNA_Wilk_B-cells_patient-C6_Up
GO Biological Processes	19	GO:0098869	cellular oxidant detoxification	19_GO:0098754 detoxification	-7.4	22	12	30182	89	110	7	6.4	2.3	241|3040|3043|3240|4353|6280|25824	ALOX5AP|HBA2|HBB|HP|MPO|S100A9|PRDX5	-5.1	RNA_Wilk_B-cells_patient-C6_Up
GO Biological Processes	19	GO:0071345	cellular response to cytokine stimulus	19_GO:0050896 response to stimulus	-7.2	5.7	7.8	30182	719	110	15	14	3.3	383|634|820|1116|1432|1511|2597|2934|3068|4332|4599|5034|7357|7494|23765	ARG1|CEACAM1|CAMP|CHI3L1|MAPK14|CTSG|GAPDH|GSN|HDGF|MNDA|MX1|P4HB|UGCG|XBP1|IL17RA	-4.9	RNA_Wilk_B-cells_patient-C6_Up
GO Biological Processes	19	GO:0002695	negative regulation of leukocyte activation	19_GO:0002376 immune system process	-7.2	12	9.7	30182	202	110	9	8.2	2.6	301|383|634|671|1511|2896|4332|8530|8993	ANXA1|ARG1|CEACAM1|BPI|CTSG|GRN|MNDA|CST7|PGLYRP1	-4.9	RNA_Wilk_B-cells_patient-C6_Up
GO Biological Processes	19	GO:0043281	regulation of cysteine-type endopeptidase activity involved in apoptotic process	19_GO:0008152 metabolic process	-7.2	12	9.6	30182	204	110	9	8.2	2.6	317|1509|2537|2821|2934|6279|6280|25824|58484	APAF1|CTSD|IFI6|GPI|GSN|S100A8|S100A9|PRDX5|NLRC4	-4.9	RNA_Wilk_B-cells_patient-C6_Up
GO Biological Processes	19	GO:0051651	maintenance of location in cell	19_GO:0051179 localization	-7.1	20	11	30182	98	110	7	6.4	2.3	706|2934|3934|5552|6279|6280|55704	TSPO|GSN|LCN2|SRGN|S100A8|S100A9|CCDC88A	-4.8	RNA_Wilk_B-cells_patient-C6_Up
GO Biological Processes	19	GO:0050729	positive regulation of inflammatory response	19_GO:0048518 positive regulation of biological process	-7	14	10	30182	154	110	8	7.3	2.5	241|351|2896|4317|6279|6280|23765|58484	ALOX5AP|APP|GRN|MMP8|S100A8|S100A9|IL17RA|NLRC4	-4.7	RNA_Wilk_B-cells_patient-C6_Up
GO Biological Processes	19	GO:1990748	cellular detoxification	19_GO:0098754 detoxification	-6.9	18	11	30182	105	110	7	6.4	2.3	241|3040|3043|3240|4353|6280|25824	ALOX5AP|HBA2|HBB|HP|MPO|S100A9|PRDX5	-4.7	RNA_Wilk_B-cells_patient-C6_Up
GO Biological Processes	19	GO:0001818	negative regulation of cytokine production	19_GO:0048519 negative regulation of biological process	-6.9	8.1	8.4	30182	371	110	11	10	2.9	301|383|634|671|706|1991|1992|4057|4317|5552|8993	ANXA1|ARG1|CEACAM1|BPI|TSPO|ELANE|SERPINB1|LTF|MMP8|SRGN|PGLYRP1	-4.7	RNA_Wilk_B-cells_patient-C6_Up
GO Biological Processes	19	GO:0010951	negative regulation of endopeptidase activity	19_GO:0048519 negative regulation of biological process	-6.9	14	9.8	30182	160	110	8	7.3	2.5	1992|2537|2597|2821|4057|5273|8530|25824	SERPINB1|IFI6|GAPDH|GPI|LTF|SERPINB10|CST7|PRDX5	-4.6	RNA_Wilk_B-cells_patient-C6_Up
GO Biological Processes	19	GO:0050866	negative regulation of cell activation	19_GO:0048519 negative regulation of biological process	-6.8	11	9.1	30182	225	110	9	8.2	2.6	301|383|634|671|1511|2896|4332|8530|8993	ANXA1|ARG1|CEACAM1|BPI|CTSG|GRN|MNDA|CST7|PGLYRP1	-4.6	RNA_Wilk_B-cells_patient-C6_Up
GO Biological Processes	19	GO:0050792	regulation of viral process	19_GO:0016032 viral process	-6.8	13	9.6	30182	165	110	8	7.3	2.5	2040|2934|4057|4599|5034|6590|7153|9636	STOM|GSN|LTF|MX1|P4HB|SLPI|TOP2A|ISG15	-4.5	RNA_Wilk_B-cells_patient-C6_Up
GO Biological Processes	19	GO:0014002	astrocyte development	19_GO:0032502 developmental process	-6.7	38	13	30182	36	110	5	4.5	2	351|2896|6279|6280|10100	APP|GRN|S100A8|S100A9|TSPAN2	-4.5	RNA_Wilk_B-cells_patient-C6_Up
GO Biological Processes	19	GO:0031349	positive regulation of defense response	19_GO:0048518 positive regulation of biological process	-6.7	7.7	8.1	30182	391	110	11	10	2.9	241|351|383|2896|4057|4317|4332|6279|6280|23765|58484	ALOX5AP|APP|ARG1|GRN|LTF|MMP8|MNDA|S100A8|S100A9|IL17RA|NLRC4	-4.5	RNA_Wilk_B-cells_patient-C6_Up
GO Biological Processes	19	GO:0097237	cellular response to toxic substance	19_GO:0050896 response to stimulus	-6.7	17	10	30182	114	110	7	6.4	2.3	241|3040|3043|3240|4353|6280|25824	ALOX5AP|HBA2|HBB|HP|MPO|S100A9|PRDX5	-4.5	RNA_Wilk_B-cells_patient-C6_Up
GO Biological Processes	19	GO:0051235	maintenance of location	19_GO:0051179 localization	-6.6	13	9.4	30182	172	110	8	7.3	2.5	301|706|2934|3934|5552|6279|6280|55704	ANXA1|TSPO|GSN|LCN2|SRGN|S100A8|S100A9|CCDC88A	-4.4	RNA_Wilk_B-cells_patient-C6_Up
GO Biological Processes	19	GO:0001819	positive regulation of cytokine production	19_GO:0048518 positive regulation of biological process	-6.6	6.7	7.7	30182	489	110	12	11	3	301|351|1116|1432|1991|2597|4317|4332|7494|9636|23765|58484	ANXA1|APP|CHI3L1|MAPK14|ELANE|GAPDH|MMP8|MNDA|XBP1|ISG15|IL17RA|NLRC4	-4.4	RNA_Wilk_B-cells_patient-C6_Up
GO Biological Processes	19	GO:0002694	regulation of leukocyte activation	19_GO:0002376 immune system process	-6.5	6	7.4	30182	598	110	13	12	3.1	301|383|634|671|952|1511|2896|4317|4332|7494|8530|8660|8993	ANXA1|ARG1|CEACAM1|BPI|CD38|CTSG|GRN|MMP8|MNDA|XBP1|CST7|IRS2|PGLYRP1	-4.4	RNA_Wilk_B-cells_patient-C6_Up
GO Biological Processes	19	GO:0098754	detoxification	19_GO:0098754 detoxification	-6.5	16	9.9	30182	122	110	7	6.4	2.3	241|3040|3043|3240|4353|6280|25824	ALOX5AP|HBA2|HBB|HP|MPO|S100A9|PRDX5	-4.3	RNA_Wilk_B-cells_patient-C6_Up
GO Biological Processes	19	GO:0045861	negative regulation of proteolysis	19_GO:0048519 negative regulation of biological process	-6.4	8.3	8.1	30182	329	110	10	9.1	2.7	351|1992|2537|2597|2821|4057|5273|6590|8530|25824	APP|SERPINB1|IFI6|GAPDH|GPI|LTF|SERPINB10|SLPI|CST7|PRDX5	-4.3	RNA_Wilk_B-cells_patient-C6_Up
GO Biological Processes	19	GO:0050777	negative regulation of immune response	19_GO:0002376 immune system process	-6.3	11	8.8	30182	191	110	8	7.3	2.5	301|383|634|966|1432|2896|8993|9636	ANXA1|ARG1|CEACAM1|CD59|MAPK14|GRN|PGLYRP1|ISG15	-4.1	RNA_Wilk_B-cells_patient-C6_Up
GO Biological Processes	19	GO:0044403	biological process involved in symbiotic interaction	19_GO:0044419 biological process involved in interspecies interaction between organisms	-6.2	9.4	8.2	30182	264	110	9	8.2	2.6	820|1511|1667|1991|2040|2597|4057|8993|728358	CAMP|CTSG|DEFA1|ELANE|STOM|GAPDH|LTF|PGLYRP1|DEFA1B	-4.1	RNA_Wilk_B-cells_patient-C6_Up
KEGG Pathway	24	hsa05202	Transcriptional misregulation in cancer		-6.2	11	8.7	30182	193	110	8	7.3	2.5	1053|1667|1668|1669|1848|1991|4353|728358	CEBPE|DEFA1|DEFA3|DEFA4|DUSP6|ELANE|MPO|DEFA1B	-4.1	RNA_Wilk_B-cells_patient-C6_Up
GO Biological Processes	19	GO:0043065	positive regulation of apoptotic process	19_GO:0048518 positive regulation of biological process	-6.2	6.1	7.3	30182	536	110	12	11	3	301|317|706|1509|1848|2896|2934|4332|6279|6280|7153|58484	ANXA1|APAF1|TSPO|CTSD|DUSP6|GRN|GSN|MNDA|S100A8|S100A9|TOP2A|NLRC4	-4.1	RNA_Wilk_B-cells_patient-C6_Up
GO Biological Processes	19	GO:0010035	response to inorganic substance	19_GO:0050896 response to stimulus	-6.2	6.1	7.2	30182	540	110	12	11	3	241|301|351|383|706|2821|3040|3043|3240|4353|6279|8895	ALOX5AP|ANXA1|APP|ARG1|TSPO|GPI|HBA2|HBB|HP|MPO|S100A8|CPNE3	-4.1	RNA_Wilk_B-cells_patient-C6_Up
GO Biological Processes	19	GO:0050865	regulation of cell activation	19_GO:0032501 multicellular organismal process	-6.1	5.4	7	30182	655	110	13	12	3.1	301|383|634|671|952|1511|2896|4317|4332|7494|8530|8660|8993	ANXA1|ARG1|CEACAM1|BPI|CD38|CTSG|GRN|MMP8|MNDA|XBP1|CST7|IRS2|PGLYRP1	-4	RNA_Wilk_B-cells_patient-C6_Up
GO Biological Processes	19	GO:0043068	positive regulation of programmed cell death	19_GO:0048518 positive regulation of biological process	-6.1	6	7.1	30182	553	110	12	11	3	301|317|706|1509|1848|2896|2934|4332|6279|6280|7153|58484	ANXA1|APAF1|TSPO|CTSD|DUSP6|GRN|GSN|MNDA|S100A8|S100A9|TOP2A|NLRC4	-4	RNA_Wilk_B-cells_patient-C6_Up
GO Biological Processes	19	GO:0009615	response to virus	19_GO:0044419 biological process involved in interspecies interaction between organisms	-6	7.6	7.6	30182	363	110	10	9.1	2.7	1432|1667|1668|2537|4599|6036|9636|10964|23765|728358	MAPK14|DEFA1|DEFA3|IFI6|MX1|RNASE2|ISG15|IFI44L|IL17RA|DEFA1B	-4	RNA_Wilk_B-cells_patient-C6_Up
Reactome Gene Sets	6	R-HSA-1566977	Fibronectin matrix formation		-6	140	20	30182	6	110	3	2.7	1.6	634|1088|4680	CEACAM1|CEACAM8|CEACAM6	-4	RNA_Wilk_B-cells_patient-C6_Up
GO Biological Processes	19	GO:0018119	peptidyl-cysteine S-nitrosylation	19_GO:0008152 metabolic process	-6	140	20	30182	6	110	3	2.7	1.6	2597|6279|6280	GAPDH|S100A8|S100A9	-4	RNA_Wilk_B-cells_patient-C6_Up
GO Biological Processes	19	GO:0017014	protein nitrosylation	19_GO:0008152 metabolic process	-6	140	20	30182	6	110	3	2.7	1.6	2597|6279|6280	GAPDH|S100A8|S100A9	-4	RNA_Wilk_B-cells_patient-C6_Up
GO Biological Processes	19	GO:1903900	regulation of viral life cycle	19_GO:0016032 viral process	-6	13	9	30182	143	110	7	6.4	2.3	2934|4057|4599|5034|6590|7153|9636	GSN|LTF|MX1|P4HB|SLPI|TOP2A|ISG15	-3.9	RNA_Wilk_B-cells_patient-C6_Up
GO Biological Processes	19	GO:0048545	response to steroid hormone	19_GO:0050896 response to stimulus	-6	8.7	7.9	30182	284	110	9	8.2	2.6	301|306|383|706|952|1667|1668|2821|728358	ANXA1|ANXA3|ARG1|TSPO|CD38|DEFA1|DEFA3|GPI|DEFA1B	-3.9	RNA_Wilk_B-cells_patient-C6_Up
GO Biological Processes	19	GO:0051238	sequestering of metal ion	19_GO:0051179 localization	-5.9	50	14	30182	22	110	4	3.6	1.8	301|3934|6279|6280	ANXA1|LCN2|S100A8|S100A9	-3.9	RNA_Wilk_B-cells_patient-C6_Up
GO Biological Processes	19	GO:0051156	glucose 6-phosphate metabolic process	19_GO:0008152 metabolic process	-5.9	50	14	30182	22	110	4	3.6	1.8	2821|5226|6888|7086	GPI|PGD|TALDO1|TKT	-3.9	RNA_Wilk_B-cells_patient-C6_Up
GO Biological Processes	19	GO:0030595	leukocyte chemotaxis	19_GO:0040011 locomotion	-5.9	13	8.8	30182	149	110	7	6.4	2.3	301|1511|1667|6279|6280|23765|728358	ANXA1|CTSG|DEFA1|S100A8|S100A9|IL17RA|DEFA1B	-3.9	RNA_Wilk_B-cells_patient-C6_Up
GO Biological Processes	19	GO:0009636	response to toxic substance	19_GO:0050896 response to stimulus	-5.8	10	8.1	30182	220	110	8	7.3	2.5	241|383|3040|3043|3240|4353|6280|25824	ALOX5AP|ARG1|HBA2|HBB|HP|MPO|S100A9|PRDX5	-3.8	RNA_Wilk_B-cells_patient-C6_Up
GO Biological Processes	19	GO:0006935	chemotaxis	19_GO:0040011 locomotion	-5.6	6	6.9	30182	500	110	11	10	2.9	301|351|1432|1511|1667|6036|6037|6279|6280|23765|728358	ANXA1|APP|MAPK14|CTSG|DEFA1|RNASE2|RNASE3|S100A8|S100A9|IL17RA|DEFA1B	-3.7	RNA_Wilk_B-cells_patient-C6_Up
GO Biological Processes	19	GO:0042330	taxis	19_GO:0040011 locomotion	-5.6	6	6.8	30182	502	110	11	10	2.9	301|351|1432|1511|1667|6036|6037|6279|6280|23765|728358	ANXA1|APP|MAPK14|CTSG|DEFA1|RNASE2|RNASE3|S100A8|S100A9|IL17RA|DEFA1B	-3.6	RNA_Wilk_B-cells_patient-C6_Up
Reactome Gene Sets	6	R-HSA-9818028	NFE2L2 regulates pentose phosphate pathway genes		-5.6	100	17	30182	8	110	3	2.7	1.6	5226|6888|7086	PGD|TALDO1|TKT	-3.6	RNA_Wilk_B-cells_patient-C6_Up
Reactome Gene Sets	6	R-HSA-1280215	Cytokine Signaling in Immune system		-5.6	4.9	6.4	30182	730	110	13	12	3.1	301|351|1432|1511|1848|2537|3934|4599|5034|6888|8660|9636|23765	ANXA1|APP|MAPK14|CTSG|DUSP6|IFI6|LCN2|MX1|P4HB|TALDO1|IRS2|ISG15|IL17RA	-3.6	RNA_Wilk_B-cells_patient-C6_Up
Canonical Pathways	11	M3468	NABA ECM REGULATORS		-5.6	9.2	7.7	30182	238	110	8	7.3	2.5	1509|1511|1991|1992|4317|5273|6590|8530	CTSD|CTSG|ELANE|SERPINB1|MMP8|SERPINB10|SLPI|CST7	-3.6	RNA_Wilk_B-cells_patient-C6_Up
GO Biological Processes	19	GO:0042744	hydrogen peroxide catabolic process	19_GO:0008152 metabolic process	-5.6	41	12	30182	27	110	4	3.6	1.8	3040|3043|4353|25824	HBA2|HBB|MPO|PRDX5	-3.6	RNA_Wilk_B-cells_patient-C6_Up
GO Biological Processes	19	GO:0050900	leukocyte migration	19_GO:0002376 immune system process	-5.5	9	7.6	30182	244	110	8	7.3	2.5	301|1511|1667|1991|6279|6280|23765|728358	ANXA1|CTSG|DEFA1|ELANE|S100A8|S100A9|IL17RA|DEFA1B	-3.5	RNA_Wilk_B-cells_patient-C6_Up
GO Biological Processes	19	GO:0040011	locomotion	19_GO:0040011 locomotion	-5.5	5.8	6.7	30182	520	110	11	10	2.9	301|351|1432|1511|1667|6036|6037|6279|6280|23765|728358	ANXA1|APP|MAPK14|CTSG|DEFA1|RNASE2|RNASE3|S100A8|S100A9|IL17RA|DEFA1B	-3.5	RNA_Wilk_B-cells_patient-C6_Up
GO Biological Processes	19	GO:0000302	response to reactive oxygen species	19_GO:0050896 response to stimulus	-5.5	11	8.1	30182	172	110	7	6.4	2.3	301|383|3040|3043|3240|4353|25824	ANXA1|ARG1|HBA2|HBB|HP|MPO|PRDX5	-3.5	RNA_Wilk_B-cells_patient-C6_Up
GO Biological Processes	19	GO:0021782	glial cell development	19_GO:0032502 developmental process	-5.4	15	8.8	30182	112	110	6	5.5	2.2	351|2896|6279|6280|9334|10100	APP|GRN|S100A8|S100A9|B4GALT5|TSPAN2	-3.5	RNA_Wilk_B-cells_patient-C6_Up
Canonical Pathways	11	M5885	NABA MATRISOME ASSOCIATED		-5.4	4.7	6.3	30182	751	110	13	12	3.1	301|306|1509|1511|1991|1992|4317|5273|6279|6280|6286|6590|8530	ANXA1|ANXA3|CTSD|CTSG|ELANE|SERPINB1|MMP8|SERPINB10|S100A8|S100A9|S100P|SLPI|CST7	-3.5	RNA_Wilk_B-cells_patient-C6_Up
GO Biological Processes	19	GO:0042119	neutrophil activation	19_GO:0002376 immune system process	-5.4	38	12	30182	29	110	4	3.6	1.8	301|306|820|1511	ANXA1|ANXA3|CAMP|CTSG	-3.5	RNA_Wilk_B-cells_patient-C6_Up
GO Biological Processes	19	GO:0042063	gliogenesis	19_GO:0032502 developmental process	-5.4	8.8	7.5	30182	249	110	8	7.3	2.5	301|351|706|2896|6279|6280|9334|10100	ANXA1|APP|TSPO|GRN|S100A8|S100A9|B4GALT5|TSPAN2	-3.5	RNA_Wilk_B-cells_patient-C6_Up
GO Biological Processes	19	GO:0007599	hemostasis	19_GO:0065007 biological regulation	-5.4	11	7.9	30182	177	110	7	6.4	2.3	966|1432|1511|2821|3043|5873|80856	CD59|MAPK14|CTSG|GPI|HBB|RAB27A|LNPK	-3.5	RNA_Wilk_B-cells_patient-C6_Up
GO Biological Processes	19	GO:0048708	astrocyte differentiation	19_GO:0032502 developmental process	-5.4	21	9.8	30182	65	110	5	4.5	2	351|2896|6279|6280|10100	APP|GRN|S100A8|S100A9|TSPAN2	-3.5	RNA_Wilk_B-cells_patient-C6_Up
GO Biological Processes	19	GO:0032103	positive regulation of response to external stimulus	19_GO:0048518 positive regulation of biological process	-5.4	5.7	6.6	30182	532	110	11	10	2.9	241|351|383|2896|4057|4317|4332|6279|6280|23765|58484	ALOX5AP|APP|ARG1|GRN|LTF|MMP8|MNDA|S100A8|S100A9|IL17RA|NLRC4	-3.5	RNA_Wilk_B-cells_patient-C6_Up
KEGG Pathway	24	hsa00030	Pentose phosphate pathway		-5.4	37	12	30182	30	110	4	3.6	1.8	2821|5226|6888|7086	GPI|PGD|TALDO1|TKT	-3.5	RNA_Wilk_B-cells_patient-C6_Up
GO Biological Processes	19	GO:0051607	defense response to virus	19_GO:0044419 biological process involved in interspecies interaction between organisms	-5.4	8.7	7.4	30182	253	110	8	7.3	2.5	1667|1668|2537|4599|6036|9636|10964|728358	DEFA1|DEFA3|IFI6|MX1|RNASE2|ISG15|IFI44L|DEFA1B	-3.5	RNA_Wilk_B-cells_patient-C6_Up
GO Biological Processes	19	GO:0140546	defense response to symbiont	19_GO:0044419 biological process involved in interspecies interaction between organisms	-5.4	8.6	7.4	30182	254	110	8	7.3	2.5	1667|1668|2537|4599|6036|9636|10964|728358	DEFA1|DEFA3|IFI6|MX1|RNASE2|ISG15|IFI44L|DEFA1B	-3.4	RNA_Wilk_B-cells_patient-C6_Up
GO Biological Processes	19	GO:0050878	regulation of body fluid levels	19_GO:0065007 biological regulation	-5.3	7.2	7	30182	345	110	9	8.2	2.6	634|966|1432|1511|2821|3043|5873|7494|80856	CEACAM1|CD59|MAPK14|CTSG|GPI|HBB|RAB27A|XBP1|LNPK	-3.4	RNA_Wilk_B-cells_patient-C6_Up
GO Biological Processes	19	GO:0030278	regulation of ossification	19_GO:0032501 multicellular organismal process	-5.3	14	8.5	30182	119	110	6	5.5	2.2	1432|4057|5552|9636|55603|359845	MAPK14|LTF|SRGN|ISG15|TENT5A|RFLNB	-3.4	RNA_Wilk_B-cells_patient-C6_Up
GO Biological Processes	19	GO:0009611	response to wounding	19_GO:0050896 response to stimulus	-5.3	6.2	6.7	30182	443	110	10	9.1	2.7	383|634|706|966|1432|1511|3043|5873|6279|80856	ARG1|CEACAM1|TSPO|CD59|MAPK14|CTSG|HBB|RAB27A|S100A8|LNPK	-3.4	RNA_Wilk_B-cells_patient-C6_Up
GO Biological Processes	19	GO:0010952	positive regulation of peptidase activity	19_GO:0048518 positive regulation of biological process	-5.3	10	7.7	30182	185	110	7	6.4	2.3	317|1509|2896|2934|6279|6280|58484	APAF1|CTSD|GRN|GSN|S100A8|S100A9|NLRC4	-3.4	RNA_Wilk_B-cells_patient-C6_Up
KEGG Pathway	24	hsa04621	NOD-like receptor signaling pathway		-5.3	10	7.7	30182	186	110	7	6.4	2.3	820|1432|1667|1668|1669|58484|728358	CAMP|MAPK14|DEFA1|DEFA3|DEFA4|NLRC4|DEFA1B	-3.4	RNA_Wilk_B-cells_patient-C6_Up
GO Biological Processes	19	GO:0002698	negative regulation of immune effector process	19_GO:0002376 immune system process	-5.2	13	8.4	30182	122	110	6	5.5	2.2	301|383|634|966|2896|8993	ANXA1|ARG1|CEACAM1|CD59|GRN|PGLYRP1	-3.4	RNA_Wilk_B-cells_patient-C6_Up
GO Biological Processes	19	GO:0036230	granulocyte activation	19_GO:0002376 immune system process	-5.2	33	11	30182	33	110	4	3.6	1.8	301|306|820|1511	ANXA1|ANXA3|CAMP|CTSG	-3.3	RNA_Wilk_B-cells_patient-C6_Up
GO Biological Processes	19	GO:0043280	positive regulation of cysteine-type endopeptidase activity involved in apoptotic process	19_GO:0048518 positive regulation of biological process	-5.2	13	8.3	30182	124	110	6	5.5	2.2	317|1509|2934|6279|6280|58484	APAF1|CTSD|GSN|S100A8|S100A9|NLRC4	-3.3	RNA_Wilk_B-cells_patient-C6_Up
GO Biological Processes	19	GO:1901652	response to peptide	19_GO:0050896 response to stimulus	-5.2	6	6.5	30182	456	110	10	9.1	2.7	301|351|383|634|1432|6272|7494|8660|11031|56729	ANXA1|APP|ARG1|CEACAM1|MAPK14|SORT1|XBP1|IRS2|RAB31|RETN	-3.3	RNA_Wilk_B-cells_patient-C6_Up
GO Biological Processes	19	GO:0006979	response to oxidative stress	19_GO:0050896 response to stimulus	-5.1	6.7	6.7	30182	366	110	9	8.2	2.6	301|351|383|952|3040|3043|3240|4353|25824	ANXA1|APP|ARG1|CD38|HBA2|HBB|HP|MPO|PRDX5	-3.2	RNA_Wilk_B-cells_patient-C6_Up
GO Biological Processes	19	GO:0005975	carbohydrate metabolic process	19_GO:0008152 metabolic process	-5.1	5.9	6.4	30182	467	110	10	9.1	2.7	1116|1432|2597|2821|3939|5226|5836|6888|8660|9334	CHI3L1|MAPK14|GAPDH|GPI|LDHA|PGD|PYGL|TALDO1|IRS2|B4GALT5	-3.2	RNA_Wilk_B-cells_patient-C6_Up
GO Biological Processes	19	GO:0043434	response to peptide hormone	19_GO:0050896 response to stimulus	-5.1	6.7	6.7	30182	369	110	9	8.2	2.6	301|383|634|1432|6272|7494|8660|11031|56729	ANXA1|ARG1|CEACAM1|MAPK14|SORT1|XBP1|IRS2|RAB31|RETN	-3.2	RNA_Wilk_B-cells_patient-C6_Up
Reactome Gene Sets	6	R-HSA-9711123	Cellular response to chemical stress		-5.1	9.7	7.4	30182	199	110	7	6.4	2.3	3040|3043|5034|5226|6888|7086|25824	HBA2|HBB|P4HB|PGD|TALDO1|TKT|PRDX5	-3.2	RNA_Wilk_B-cells_patient-C6_Up
GO Biological Processes	19	GO:0032652	regulation of interleukin-1 production	19_GO:0032501 multicellular organismal process	-5.1	13	8	30182	131	110	6	5.5	2.2	301|351|634|1992|4332|58484	ANXA1|APP|CEACAM1|SERPINB1|MNDA|NLRC4	-3.2	RNA_Wilk_B-cells_patient-C6_Up
Reactome Gene Sets	6	R-HSA-449147	Signaling by Interleukins		-5	5.8	6.4	30182	473	110	10	9.1	2.7	301|351|1432|1511|1848|3934|5034|6888|8660|23765	ANXA1|APP|MAPK14|CTSG|DUSP6|LCN2|P4HB|TALDO1|IRS2|IL17RA	-3.2	RNA_Wilk_B-cells_patient-C6_Up
GO Biological Processes	19	GO:0060326	cell chemotaxis	19_GO:0040011 locomotion	-5	9.5	7.3	30182	202	110	7	6.4	2.3	301|1511|1667|6279|6280|23765|728358	ANXA1|CTSG|DEFA1|S100A8|S100A9|IL17RA|DEFA1B	-3.2	RNA_Wilk_B-cells_patient-C6_Up
GO Biological Processes	19	GO:0031348	negative regulation of defense response	19_GO:0048519 negative regulation of biological process	-5	7.7	6.9	30182	284	110	8	7.3	2.5	383|634|1432|1991|2896|8530|8993|9636	ARG1|CEACAM1|MAPK14|ELANE|GRN|CST7|PGLYRP1|ISG15	-3.2	RNA_Wilk_B-cells_patient-C6_Up
GO Biological Processes	19	GO:0030500	regulation of bone mineralization	19_GO:0032502 developmental process	-4.9	17	8.7	30182	80	110	5	4.5	2	4057|5552|9636|55603|359845	LTF|SRGN|ISG15|TENT5A|RFLNB	-3.1	RNA_Wilk_B-cells_patient-C6_Up
GO Biological Processes	19	GO:0042743	hydrogen peroxide metabolic process	19_GO:0008152 metabolic process	-4.9	28	10	30182	39	110	4	3.6	1.8	3040|3043|4353|25824	HBA2|HBB|MPO|PRDX5	-3.1	RNA_Wilk_B-cells_patient-C6_Up
Reactome Gene Sets	6	R-HSA-2168880	Scavenging of heme from plasma		-4.9	63	14	30182	13	110	3	2.7	1.6	3040|3043|3240	HBA2|HBB|HP	-3.1	RNA_Wilk_B-cells_patient-C6_Up
GO Biological Processes	19	GO:0006098	pentose-phosphate shunt	19_GO:0008152 metabolic process	-4.9	63	14	30182	13	110	3	2.7	1.6	5226|6888|7086	PGD|TALDO1|TKT	-3.1	RNA_Wilk_B-cells_patient-C6_Up
GO Biological Processes	19	GO:2001056	positive regulation of cysteine-type endopeptidase activity	19_GO:0048518 positive regulation of biological process	-4.9	12	7.7	30182	142	110	6	5.5	2.2	317|1509|2934|6279|6280|58484	APAF1|CTSD|GSN|S100A8|S100A9|NLRC4	-3.1	RNA_Wilk_B-cells_patient-C6_Up
GO Biological Processes	19	GO:0032868	response to insulin	19_GO:0050896 response to stimulus	-4.8	8.9	7	30182	217	110	7	6.4	2.3	634|1432|6272|7494|8660|11031|56729	CEACAM1|MAPK14|SORT1|XBP1|IRS2|RAB31|RETN	-3	RNA_Wilk_B-cells_patient-C6_Up
GO Biological Processes	19	GO:0032870	cellular response to hormone stimulus	19_GO:0050896 response to stimulus	-4.8	5.5	6.1	30182	501	110	10	9.1	2.7	301|383|634|1667|1668|7357|7494|8660|11031|728358	ANXA1|ARG1|CEACAM1|DEFA1|DEFA3|UGCG|XBP1|IRS2|RAB31|DEFA1B	-3	RNA_Wilk_B-cells_patient-C6_Up
GO Biological Processes	19	GO:0045069	regulation of viral genome replication	19_GO:0016032 viral process	-4.8	16	8.4	30182	86	110	5	4.5	2	4057|4599|6590|7153|9636	LTF|MX1|SLPI|TOP2A|ISG15	-3	RNA_Wilk_B-cells_patient-C6_Up
Reactome Gene Sets	6	R-HSA-166016	Toll Like Receptor 4 (TLR4) Cascade		-4.8	11	7.5	30182	146	110	6	5.5	2.2	351|671|1432|1848|6279|6280	APP|BPI|MAPK14|DUSP6|S100A8|S100A9	-3	RNA_Wilk_B-cells_patient-C6_Up
GO Biological Processes	19	GO:0002274	myeloid leukocyte activation	19_GO:0002376 immune system process	-4.7	11	7.4	30182	150	110	6	5.5	2.2	301|306|351|820|1511|2896	ANXA1|ANXA3|APP|CAMP|CTSG|GRN	-3	RNA_Wilk_B-cells_patient-C6_Up
GO Biological Processes	19	GO:0048525	negative regulation of viral process	19_GO:0016032 viral process	-4.7	15	8.2	30182	90	110	5	4.5	2	2934|4057|4599|6590|9636	GSN|LTF|MX1|SLPI|ISG15	-2.9	RNA_Wilk_B-cells_patient-C6_Up
Reactome Gene Sets	6	R-HSA-71336	Pentose phosphate pathway		-4.7	55	13	30182	15	110	3	2.7	1.6	5226|6888|7086	PGD|TALDO1|TKT	-2.9	RNA_Wilk_B-cells_patient-C6_Up
GO Biological Processes	19	GO:1901142	insulin metabolic process	19_GO:0008152 metabolic process	-4.7	55	13	30182	15	110	3	2.7	1.6	634|1509|5034	CEACAM1|CTSD|P4HB	-2.9	RNA_Wilk_B-cells_patient-C6_Up
GO Biological Processes	19	GO:2000117	negative regulation of cysteine-type endopeptidase activity	19_GO:0048519 negative regulation of biological process	-4.7	15	8.1	30182	91	110	5	4.5	2	2537|2821|4057|8530|25824	IFI6|GPI|LTF|CST7|PRDX5	-2.9	RNA_Wilk_B-cells_patient-C6_Up
KEGG Pathway	24	hsa04657	IL-17 signaling pathway		-4.6	15	8	30182	94	110	5	4.5	2	1432|3934|6279|6280|23765	MAPK14|LCN2|S100A8|S100A9|IL17RA	-2.9	RNA_Wilk_B-cells_patient-C6_Up
GO Biological Processes	19	GO:0006740	NADPH regeneration	19_GO:0008152 metabolic process	-4.6	51	12	30182	16	110	3	2.7	1.6	5226|6888|7086	PGD|TALDO1|TKT	-2.9	RNA_Wilk_B-cells_patient-C6_Up
GO Biological Processes	19	GO:0051092	positive regulation of NF-kappaB transcription factor activity	19_GO:0008152 metabolic process	-4.6	10	7.2	30182	159	110	6	5.5	2.2	351|4057|6279|6280|58484|92140	APP|LTF|S100A8|S100A9|NLRC4|MTDH	-2.8	RNA_Wilk_B-cells_patient-C6_Up
KEGG Pathway	24	hsa05150	Staphylococcus aureus infection		-4.6	14	7.9	30182	96	110	5	4.5	2	820|1667|1668|1669|728358	CAMP|DEFA1|DEFA3|DEFA4|DEFA1B	-2.8	RNA_Wilk_B-cells_patient-C6_Up
GO Biological Processes	19	GO:0042060	wound healing	19_GO:0050896 response to stimulus	-4.5	6.6	6.2	30182	331	110	8	7.3	2.5	634|966|1432|1511|3043|5873|6279|80856	CEACAM1|CD59|MAPK14|CTSG|HBB|RAB27A|S100A8|LNPK	-2.8	RNA_Wilk_B-cells_patient-C6_Up
Reactome Gene Sets	6	R-HSA-1461973	Defensins		-4.5	22	9	30182	50	110	4	3.6	1.8	1667|1668|1669|728358	DEFA1|DEFA3|DEFA4|DEFA1B	-2.7	RNA_Wilk_B-cells_patient-C6_Up
GO Biological Processes	19	GO:0070167	regulation of biomineral tissue development	19_GO:0032502 developmental process	-4.5	14	7.7	30182	101	110	5	4.5	2	4057|5552|9636|55603|359845	LTF|SRGN|ISG15|TENT5A|RFLNB	-2.7	RNA_Wilk_B-cells_patient-C6_Up
Reactome Gene Sets	6	R-HSA-168898	Toll-like Receptor Cascades		-4.4	9.8	6.9	30182	168	110	6	5.5	2.2	351|671|1432|1848|6279|6280	APP|BPI|MAPK14|DUSP6|S100A8|S100A9	-2.7	RNA_Wilk_B-cells_patient-C6_Up
GO Biological Processes	19	GO:0051250	negative regulation of lymphocyte activation	19_GO:0002376 immune system process	-4.4	9.8	6.9	30182	168	110	6	5.5	2.2	301|383|634|1511|4332|8993	ANXA1|ARG1|CEACAM1|CTSG|MNDA|PGLYRP1	-2.7	RNA_Wilk_B-cells_patient-C6_Up
GO Biological Processes	19	GO:0032102	negative regulation of response to external stimulus	19_GO:0048519 negative regulation of biological process	-4.4	5.6	5.9	30182	443	110	9	8.2	2.6	383|634|1432|1991|2896|4057|8530|8993|9636	ARG1|CEACAM1|MAPK14|ELANE|GRN|LTF|CST7|PGLYRP1|ISG15	-2.7	RNA_Wilk_B-cells_patient-C6_Up
GO Biological Processes	19	GO:0010950	positive regulation of endopeptidase activity	19_GO:0048518 positive regulation of biological process	-4.4	9.6	6.8	30182	171	110	6	5.5	2.2	317|1509|2934|6279|6280|58484	APAF1|CTSD|GSN|S100A8|S100A9|NLRC4	-2.7	RNA_Wilk_B-cells_patient-C6_Up
GO Biological Processes	19	GO:0007596	blood coagulation	19_GO:0032501 multicellular organismal process	-4.4	9.6	6.8	30182	172	110	6	5.5	2.2	966|1432|1511|3043|5873|80856	CD59|MAPK14|CTSG|HBB|RAB27A|LNPK	-2.7	RNA_Wilk_B-cells_patient-C6_Up
GO Biological Processes	19	GO:0072593	reactive oxygen species metabolic process	19_GO:0008152 metabolic process	-4.4	13	7.5	30182	105	110	5	4.5	2	2537|3040|3043|4353|25824	IFI6|HBA2|HBB|MPO|PRDX5	-2.7	RNA_Wilk_B-cells_patient-C6_Up
GO Biological Processes	19	GO:0002523	leukocyte migration involved in inflammatory response	19_GO:0002376 immune system process	-4.4	43	11	30182	19	110	3	2.7	1.6	1991|6279|6280	ELANE|S100A8|S100A9	-2.7	RNA_Wilk_B-cells_patient-C6_Up
GO Biological Processes	19	GO:0043031	negative regulation of macrophage activation	19_GO:0002376 immune system process	-4.4	43	11	30182	19	110	3	2.7	1.6	671|2896|8530	BPI|GRN|CST7	-2.7	RNA_Wilk_B-cells_patient-C6_Up
GO Biological Processes	19	GO:0050817	coagulation	19_GO:0032501 multicellular organismal process	-4.4	9.5	6.8	30182	174	110	6	5.5	2.2	966|1432|1511|3043|5873|80856	CD59|MAPK14|CTSG|HBB|RAB27A|LNPK	-2.7	RNA_Wilk_B-cells_patient-C6_Up
GO Biological Processes	19	GO:0042542	response to hydrogen peroxide	19_GO:0050896 response to stimulus	-4.4	13	7.4	30182	106	110	5	4.5	2	301|383|3040|3043|3240	ANXA1|ARG1|HBA2|HBB|HP	-2.7	RNA_Wilk_B-cells_patient-C6_Up
GO Biological Processes	19	GO:1903978	regulation of microglial cell activation	19_GO:0002376 immune system process	-4.3	41	11	30182	20	110	3	2.7	1.6	2896|4317|8530	GRN|MMP8|CST7	-2.6	RNA_Wilk_B-cells_patient-C6_Up
GO Biological Processes	19	GO:0016052	carbohydrate catabolic process	19_GO:0008152 metabolic process	-4.3	12	7.3	30182	110	110	5	4.5	2	2597|2821|3939|5226|5836	GAPDH|GPI|LDHA|PGD|PYGL	-2.6	RNA_Wilk_B-cells_patient-C6_Up
GO Biological Processes	19	GO:0045071	negative regulation of viral genome replication	19_GO:0016032 viral process	-4.3	20	8.4	30182	56	110	4	3.6	1.8	4057|4599|6590|9636	LTF|MX1|SLPI|ISG15	-2.6	RNA_Wilk_B-cells_patient-C6_Up
GO Biological Processes	19	GO:0001775	cell activation	19_GO:0032501 multicellular organismal process	-4.3	4.3	5.3	30182	705	110	11	10	2.9	301|306|351|820|952|1432|1511|2896|3043|5873|23765	ANXA1|ANXA3|APP|CAMP|CD38|MAPK14|CTSG|GRN|HBB|RAB27A|IL17RA	-2.6	RNA_Wilk_B-cells_patient-C6_Up
GO Biological Processes	19	GO:0010042	response to manganese ion	19_GO:0050896 response to stimulus	-4.2	39	11	30182	21	110	3	2.7	1.6	351|383|706	APP|ARG1|TSPO	-2.6	RNA_Wilk_B-cells_patient-C6_Up
Reactome Gene Sets	6	R-HSA-166058	MyD88:MAL(TIRAP) cascade initiated on plasma membrane		-4.2	12	7.2	30182	113	110	5	4.5	2	351|1432|1848|6279|6280	APP|MAPK14|DUSP6|S100A8|S100A9	-2.6	RNA_Wilk_B-cells_patient-C6_Up
Reactome Gene Sets	6	R-HSA-168188	Toll Like Receptor TLR6:TLR2 Cascade		-4.2	12	7.2	30182	113	110	5	4.5	2	351|1432|1848|6279|6280	APP|MAPK14|DUSP6|S100A8|S100A9	-2.6	RNA_Wilk_B-cells_patient-C6_Up
GO Biological Processes	19	GO:1904018	positive regulation of vasculature development	19_GO:0032502 developmental process	-4.2	8.9	6.5	30182	185	110	6	5.5	2.2	306|820|1116|2896|7494|92140	ANXA3|CAMP|CHI3L1|GRN|XBP1|MTDH	-2.6	RNA_Wilk_B-cells_patient-C6_Up
GO Biological Processes	19	GO:0045766	positive regulation of angiogenesis	19_GO:0032502 developmental process	-4.2	8.9	6.5	30182	185	110	6	5.5	2.2	306|820|1116|2896|7494|92140	ANXA3|CAMP|CHI3L1|GRN|XBP1|MTDH	-2.6	RNA_Wilk_B-cells_patient-C6_Up
GO Biological Processes	19	GO:0051091	positive regulation of DNA-binding transcription factor activity	19_GO:0008152 metabolic process	-4.2	7.1	6.1	30182	271	110	7	6.4	2.3	306|351|4057|6279|6280|58484|92140	ANXA3|APP|LTF|S100A8|S100A9|NLRC4|MTDH	-2.6	RNA_Wilk_B-cells_patient-C6_Up
KEGG Pathway	24	hsa01200	Carbon metabolism		-4.2	12	7.1	30182	115	110	5	4.5	2	2597|2821|5226|6888|7086	GAPDH|GPI|PGD|TALDO1|TKT	-2.5	RNA_Wilk_B-cells_patient-C6_Up
Reactome Gene Sets	6	R-HSA-168179	Toll Like Receptor TLR1:TLR2 Cascade		-4.2	12	7.1	30182	116	110	5	4.5	2	351|1432|1848|6279|6280	APP|MAPK14|DUSP6|S100A8|S100A9	-2.5	RNA_Wilk_B-cells_patient-C6_Up
Reactome Gene Sets	6	R-HSA-181438	Toll Like Receptor 2 (TLR2) Cascade		-4.2	12	7.1	30182	116	110	5	4.5	2	351|1432|1848|6279|6280	APP|MAPK14|DUSP6|S100A8|S100A9	-2.5	RNA_Wilk_B-cells_patient-C6_Up
GO Biological Processes	19	GO:0030520	intracellular estrogen receptor signaling pathway	19_GO:0023052 signaling	-4.2	37	10	30182	22	110	3	2.7	1.6	1667|1668|728358	DEFA1|DEFA3|DEFA1B	-2.5	RNA_Wilk_B-cells_patient-C6_Up
GO Biological Processes	19	GO:0043903	regulation of biological process involved in symbiotic interaction	19_GO:0044419 biological process involved in interspecies interaction between organisms	-4.1	18	8	30182	61	110	4	3.6	1.8	383|2934|4057|5034	ARG1|GSN|LTF|P4HB	-2.5	RNA_Wilk_B-cells_patient-C6_Up
GO Biological Processes	19	GO:0010001	glial cell differentiation	19_GO:0032502 developmental process	-4.1	8.6	6.4	30182	192	110	6	5.5	2.2	351|2896|6279|6280|9334|10100	APP|GRN|S100A8|S100A9|B4GALT5|TSPAN2	-2.5	RNA_Wilk_B-cells_patient-C6_Up
GO Biological Processes	19	GO:0002446	neutrophil mediated immunity	19_GO:0002376 immune system process	-4.1	36	10	30182	23	110	3	2.7	1.6	306|1511|1991	ANXA3|CTSG|ELANE	-2.5	RNA_Wilk_B-cells_patient-C6_Up
GO Biological Processes	19	GO:0043030	regulation of macrophage activation	19_GO:0002376 immune system process	-4.1	18	8	30182	62	110	4	3.6	1.8	671|2896|4317|8530	BPI|GRN|MMP8|CST7	-2.5	RNA_Wilk_B-cells_patient-C6_Up
GO Biological Processes	19	GO:0002697	regulation of immune effector process	19_GO:0002376 immune system process	-4.1	5.7	5.6	30182	384	110	8	7.3	2.5	301|383|634|966|2821|2896|7494|8993	ANXA1|ARG1|CEACAM1|CD59|GPI|GRN|XBP1|PGLYRP1	-2.5	RNA_Wilk_B-cells_patient-C6_Up
Reactome Gene Sets	6	R-HSA-1442490	Collagen degradation		-4	17	7.8	30182	64	110	4	3.6	1.8	1308|1509|1991|4317	COL17A1|CTSD|ELANE|MMP8	-2.4	RNA_Wilk_B-cells_patient-C6_Up
Reactome Gene Sets	6	R-HSA-5668599	RHO GTPases Activate NADPH Oxidases		-4	34	9.9	30182	24	110	3	2.7	1.6	1432|6279|6280	MAPK14|S100A8|S100A9	-2.4	RNA_Wilk_B-cells_patient-C6_Up
Reactome Gene Sets	6	R-HSA-109582	Hemostasis		-4	4.4	5.2	30182	621	110	10	9.1	2.7	87|351|634|967|1062|1088|1432|3043|4680|5552	ACTN1|APP|CEACAM1|CD63|CENPE|CEACAM8|MAPK14|HBB|CEACAM6|SRGN	-2.4	RNA_Wilk_B-cells_patient-C6_Up
GO Biological Processes	19	GO:0032507	maintenance of protein location in cell	19_GO:0051179 localization	-4	17	7.8	30182	65	110	4	3.6	1.8	706|2934|5552|55704	TSPO|GSN|SRGN|CCDC88A	-2.4	RNA_Wilk_B-cells_patient-C6_Up
GO Biological Processes	19	GO:0051249	regulation of lymphocyte activation	19_GO:0002376 immune system process	-4	4.9	5.3	30182	503	110	9	8.2	2.6	301|383|634|952|1511|4332|7494|8660|8993	ANXA1|ARG1|CEACAM1|CD38|CTSG|MNDA|XBP1|IRS2|PGLYRP1	-2.4	RNA_Wilk_B-cells_patient-C6_Up
GO Biological Processes	19	GO:0002832	negative regulation of response to biotic stimulus	19_GO:0048519 negative regulation of biological process	-4	11	6.8	30182	125	110	5	4.5	2	383|634|2896|4057|9636	ARG1|CEACAM1|GRN|LTF|ISG15	-2.4	RNA_Wilk_B-cells_patient-C6_Up
Reactome Gene Sets	6	R-HSA-71387	Metabolism of carbohydrates		-4	6.5	5.8	30182	295	110	7	6.4	2.3	2597|2821|5226|5836|6888|7086|9334	GAPDH|GPI|PGD|PYGL|TALDO1|TKT|B4GALT5	-2.4	RNA_Wilk_B-cells_patient-C6_Up
GO Biological Processes	19	GO:0010632	regulation of epithelial cell migration	19_GO:0040011 locomotion	-4	6.5	5.8	30182	295	110	7	6.4	2.3	301|306|634|2821|2896|4070|8660	ANXA1|ANXA3|CEACAM1|GPI|GRN|TACSTD2|IRS2	-2.4	RNA_Wilk_B-cells_patient-C6_Up
GO Biological Processes	19	GO:0055076	transition metal ion homeostasis	19_GO:0042592 homeostatic process	-4	11	6.7	30182	128	110	5	4.5	2	351|3934|4057|6279|6280	APP|LCN2|LTF|S100A8|S100A9	-2.4	RNA_Wilk_B-cells_patient-C6_Up
GO Biological Processes	19	GO:0035994	response to muscle stretch	19_GO:0050896 response to stimulus	-3.9	32	9.5	30182	26	110	3	2.7	1.6	1432|2821|2934	MAPK14|GPI|GSN	-2.4	RNA_Wilk_B-cells_patient-C6_Up
GO Biological Processes	19	GO:0070848	response to growth factor	19_GO:0050896 response to stimulus	-3.9	4.7	5.2	30182	520	110	9	8.2	2.6	301|306|317|351|383|1432|1848|6272|8895	ANXA1|ANXA3|APAF1|APP|ARG1|MAPK14|DUSP6|SORT1|CPNE3	-2.3	RNA_Wilk_B-cells_patient-C6_Up
GO Biological Processes	19	GO:0070555	response to interleukin-1	19_GO:0050896 response to stimulus	-3.9	10	6.5	30182	132	110	5	4.5	2	301|351|820|952|1116	ANXA1|APP|CAMP|CD38|CHI3L1	-2.3	RNA_Wilk_B-cells_patient-C6_Up
GO Biological Processes	19	GO:2000379	positive regulation of reactive oxygen species metabolic process	19_GO:0048518 positive regulation of biological process	-3.9	16	7.4	30182	70	110	4	3.6	1.8	706|1432|4317|5873	TSPO|MAPK14|MMP8|RAB27A	-2.3	RNA_Wilk_B-cells_patient-C6_Up
GO Biological Processes	19	GO:0042832	defense response to protozoan	19_GO:0044419 biological process involved in interspecies interaction between organisms	-3.9	30	9.3	30182	27	110	3	2.7	1.6	383|1667|728358	ARG1|DEFA1|DEFA1B	-2.3	RNA_Wilk_B-cells_patient-C6_Up
GO Biological Processes	19	GO:0019362	pyridine nucleotide metabolic process	19_GO:0008152 metabolic process	-3.9	15	7.4	30182	71	110	4	3.6	1.8	952|5226|6888|7086	CD38|PGD|TALDO1|TKT	-2.3	RNA_Wilk_B-cells_patient-C6_Up
GO Biological Processes	19	GO:0046496	nicotinamide nucleotide metabolic process	19_GO:0008152 metabolic process	-3.9	15	7.4	30182	71	110	4	3.6	1.8	952|5226|6888|7086	CD38|PGD|TALDO1|TKT	-2.3	RNA_Wilk_B-cells_patient-C6_Up
GO Biological Processes	19	GO:0019725	cellular homeostasis	19_GO:0042592 homeostatic process	-3.9	4.2	5	30182	652	110	10	9.1	2.7	351|1991|2896|3934|6279|6280|7494|8660|25824|118987	APP|ELANE|GRN|LCN2|S100A8|S100A9|XBP1|IRS2|PRDX5|PDZD8	-2.3	RNA_Wilk_B-cells_patient-C6_Up
GO Biological Processes	19	GO:0009612	response to mechanical stimulus	19_GO:0050896 response to stimulus	-3.9	7.7	5.9	30182	215	110	6	5.5	2.2	1116|1432|2821|2934|4353|56729	CHI3L1|MAPK14|GPI|GSN|MPO|RETN	-2.3	RNA_Wilk_B-cells_patient-C6_Up
Reactome Gene Sets	6	R-HSA-2262752	Cellular responses to stress		-3.8	3.8	4.9	30182	789	110	11	10	2.9	1432|3005|3040|3043|3068|5034|5226|6888|7086|7494|25824	MAPK14|H1-0|HBA2|HBB|HDGF|P4HB|PGD|TALDO1|TKT|XBP1|PRDX5	-2.3	RNA_Wilk_B-cells_patient-C6_Up
GO Biological Processes	19	GO:0001562	response to protozoan	19_GO:0044419 biological process involved in interspecies interaction between organisms	-3.8	28	8.9	30182	29	110	3	2.7	1.6	383|1667|728358	ARG1|DEFA1|DEFA1B	-2.3	RNA_Wilk_B-cells_patient-C6_Up
Reactome Gene Sets	6	R-HSA-1474228	Degradation of the extracellular matrix		-3.8	9.8	6.3	30182	140	110	5	4.5	2	1308|1509|1511|1991|4317	COL17A1|CTSD|CTSG|ELANE|MMP8	-2.3	RNA_Wilk_B-cells_patient-C6_Up
GO Biological Processes	19	GO:0097529	myeloid leukocyte migration	19_GO:0002376 immune system process	-3.8	9.8	6.3	30182	140	110	5	4.5	2	301|1511|6279|6280|23765	ANXA1|CTSG|S100A8|S100A9|IL17RA	-2.3	RNA_Wilk_B-cells_patient-C6_Up
KEGG Pathway	24	hsa01230	Biosynthesis of amino acids		-3.8	15	7.1	30182	75	110	4	3.6	1.8	383|2597|6888|7086	ARG1|GAPDH|TALDO1|TKT	-2.2	RNA_Wilk_B-cells_patient-C6_Up
GO Biological Processes	19	GO:0006919	activation of cysteine-type endopeptidase activity involved in apoptotic process	19_GO:0048518 positive regulation of biological process	-3.8	14	7.1	30182	76	110	4	3.6	1.8	317|6279|6280|58484	APAF1|S100A8|S100A9|NLRC4	-2.2	RNA_Wilk_B-cells_patient-C6_Up
GO Biological Processes	19	GO:0055082	cellular chemical homeostasis	19_GO:0042592 homeostatic process	-3.7	4.5	5	30182	546	110	9	8.2	2.6	351|1991|2896|3934|6279|6280|7494|8660|118987	APP|ELANE|GRN|LCN2|S100A8|S100A9|XBP1|IRS2|PDZD8	-2.2	RNA_Wilk_B-cells_patient-C6_Up
GO Biological Processes	19	GO:0045824	negative regulation of innate immune response	19_GO:0044419 biological process involved in interspecies interaction between organisms	-3.7	14	7	30182	78	110	4	3.6	1.8	383|634|2896|9636	ARG1|CEACAM1|GRN|ISG15	-2.2	RNA_Wilk_B-cells_patient-C6_Up
GO Biological Processes	19	GO:0072524	pyridine-containing compound metabolic process	19_GO:0008152 metabolic process	-3.7	14	7	30182	78	110	4	3.6	1.8	952|5226|6888|7086	CD38|PGD|TALDO1|TKT	-2.2	RNA_Wilk_B-cells_patient-C6_Up
GO Biological Processes	19	GO:0071383	cellular response to steroid hormone stimulus	19_GO:0050896 response to stimulus	-3.6	9.1	6	30182	150	110	5	4.5	2	301|383|1667|1668|728358	ANXA1|ARG1|DEFA1|DEFA3|DEFA1B	-2.1	RNA_Wilk_B-cells_patient-C6_Up
GO Biological Processes	19	GO:2000377	regulation of reactive oxygen species metabolic process	19_GO:0008152 metabolic process	-3.6	9.1	6	30182	150	110	5	4.5	2	706|1432|3240|4317|5873	TSPO|MAPK14|HP|MMP8|RAB27A	-2.1	RNA_Wilk_B-cells_patient-C6_Up
Reactome Gene Sets	6	R-HSA-1592389	Activation of Matrix Metalloproteinases		-3.6	25	8.3	30182	33	110	3	2.7	1.6	1511|1991|4317	CTSG|ELANE|MMP8	-2.1	RNA_Wilk_B-cells_patient-C6_Up
GO Biological Processes	19	GO:0030335	positive regulation of cell migration	19_GO:0040011 locomotion	-3.6	4.3	4.9	30182	569	110	9	8.2	2.6	301|306|351|2821|2896|4680|7494|8660|8895	ANXA1|ANXA3|APP|GPI|GRN|CEACAM6|XBP1|IRS2|CPNE3	-2.1	RNA_Wilk_B-cells_patient-C6_Up
Reactome Gene Sets	6	R-HSA-194315	Signaling by Rho GTPases		-3.6	3.9	4.7	30182	707	110	10	9.1	2.7	87|1062|1063|1432|2040|4637|6279|6280|54443|55704	ACTN1|CENPE|CENPF|MAPK14|STOM|MYL6|S100A8|S100A9|ANLN|CCDC88A	-2.1	RNA_Wilk_B-cells_patient-C6_Up
GO Biological Processes	19	GO:0006163	purine nucleotide metabolic process	19_GO:0008152 metabolic process	-3.6	4.8	5	30182	457	110	8	7.3	2.5	952|2597|2821|3939|5226|6888|7086|55711	CD38|GAPDH|GPI|LDHA|PGD|TALDO1|TKT|FAR2	-2.1	RNA_Wilk_B-cells_patient-C6_Up
GO Biological Processes	19	GO:0006909	phagocytosis	19_GO:0051179 localization	-3.5	8.7	5.9	30182	158	110	5	4.5	2	301|306|1053|1991|2934	ANXA1|ANXA3|CEBPE|ELANE|GSN	-2.1	RNA_Wilk_B-cells_patient-C6_Up
GO Biological Processes	19	GO:0071621	granulocyte chemotaxis	19_GO:0040011 locomotion	-3.5	13	6.6	30182	87	110	4	3.6	1.8	301|6279|6280|23765	ANXA1|S100A8|S100A9|IL17RA	-2.1	RNA_Wilk_B-cells_patient-C6_Up
GO Biological Processes	19	GO:0045765	regulation of angiogenesis	19_GO:0032502 developmental process	-3.5	5.5	5.1	30182	349	110	7	6.4	2.3	306|634|820|1116|2896|7494|92140	ANXA3|CEACAM1|CAMP|CHI3L1|GRN|XBP1|MTDH	-2.1	RNA_Wilk_B-cells_patient-C6_Up
GO Biological Processes	19	GO:0006739	NADP metabolic process	19_GO:0008152 metabolic process	-3.5	23	7.9	30182	36	110	3	2.7	1.6	5226|6888|7086	PGD|TALDO1|TKT	-2.1	RNA_Wilk_B-cells_patient-C6_Up
Reactome Gene Sets	6	R-HSA-9716542	Signaling by Rho GTPases, Miro GTPases and RHOBTB3		-3.5	3.8	4.6	30182	723	110	10	9.1	2.7	87|1062|1063|1432|2040|4637|6279|6280|54443|55704	ACTN1|CENPE|CENPF|MAPK14|STOM|MYL6|S100A8|S100A9|ANLN|CCDC88A	-2	RNA_Wilk_B-cells_patient-C6_Up
Reactome Gene Sets	6	R-HSA-2980736	Peptide hormone metabolism		-3.5	12	6.5	30182	89	110	4	3.6	1.8	1509|1511|5034|5873	CTSD|CTSG|P4HB|RAB27A	-2	RNA_Wilk_B-cells_patient-C6_Up
GO Biological Processes	19	GO:1901342	regulation of vasculature development	19_GO:0032502 developmental process	-3.5	5.4	5.1	30182	355	110	7	6.4	2.3	306|634|820|1116|2896|7494|92140	ANXA3|CEACAM1|CAMP|CHI3L1|GRN|XBP1|MTDH	-2	RNA_Wilk_B-cells_patient-C6_Up
GO Biological Processes	19	GO:2000147	positive regulation of cell motility	19_GO:0040011 locomotion	-3.5	4.2	4.7	30182	594	110	9	8.2	2.6	301|306|351|2821|2896|4680|7494|8660|8895	ANXA1|ANXA3|APP|GPI|GRN|CEACAM6|XBP1|IRS2|CPNE3	-2	RNA_Wilk_B-cells_patient-C6_Up
GO Biological Processes	19	GO:0030225	macrophage differentiation	19_GO:0032502 developmental process	-3.5	22	7.8	30182	37	110	3	2.7	1.6	351|1053|10100	APP|CEBPE|TSPAN2	-2	RNA_Wilk_B-cells_patient-C6_Up
GO Biological Processes	19	GO:0009595	detection of biotic stimulus	19_GO:0050896 response to stimulus	-3.4	22	7.7	30182	38	110	3	2.7	1.6	706|8993|58484	TSPO|PGLYRP1|NLRC4	-2	RNA_Wilk_B-cells_patient-C6_Up
GO Biological Processes	19	GO:0032717	negative regulation of interleukin-8 production	19_GO:0048519 negative regulation of biological process	-3.4	22	7.7	30182	38	110	3	2.7	1.6	301|671|1991	ANXA1|BPI|ELANE	-2	RNA_Wilk_B-cells_patient-C6_Up
GO Biological Processes	19	GO:0045185	maintenance of protein location	19_GO:0051179 localization	-3.4	12	6.3	30182	92	110	4	3.6	1.8	706|2934|5552|55704	TSPO|GSN|SRGN|CCDC88A	-2	RNA_Wilk_B-cells_patient-C6_Up
GO Biological Processes	19	GO:0018198	peptidyl-cysteine modification	19_GO:0008152 metabolic process	-3.4	21	7.6	30182	39	110	3	2.7	1.6	2597|6279|6280	GAPDH|S100A8|S100A9	-2	RNA_Wilk_B-cells_patient-C6_Up
GO Biological Processes	19	GO:0045862	positive regulation of proteolysis	19_GO:0048518 positive regulation of biological process	-3.4	5.3	5	30182	365	110	7	6.4	2.3	317|1509|2896|2934|6279|6280|58484	APAF1|CTSD|GRN|GSN|S100A8|S100A9|NLRC4	-2	RNA_Wilk_B-cells_patient-C6_Up
GO Biological Processes	19	GO:0007568	aging	19_GO:0032502 developmental process	-3.4	8.1	5.6	30182	169	110	5	4.5	2	317|383|706|4353|56729	APAF1|ARG1|TSPO|MPO|RETN	-2	RNA_Wilk_B-cells_patient-C6_Up
GO Biological Processes	19	GO:0040017	positive regulation of locomotion	19_GO:0040011 locomotion	-3.4	4.1	4.6	30182	609	110	9	8.2	2.6	301|306|351|2821|2896|4680|7494|8660|8895	ANXA1|ANXA3|APP|GPI|GRN|CEACAM6|XBP1|IRS2|CPNE3	-2	RNA_Wilk_B-cells_patient-C6_Up
GO Biological Processes	19	GO:0010038	response to metal ion	19_GO:0050896 response to stimulus	-3.4	5.2	4.9	30182	367	110	7	6.4	2.3	241|351|383|706|2821|6279|8895	ALOX5AP|APP|ARG1|TSPO|GPI|S100A8|CPNE3	-2	RNA_Wilk_B-cells_patient-C6_Up
GO Biological Processes	19	GO:0019217	regulation of fatty acid metabolic process	19_GO:0008152 metabolic process	-3.4	12	6.2	30182	95	110	4	3.6	1.8	301|634|8660|10613	ANXA1|CEACAM1|IRS2|ERLIN1	-2	RNA_Wilk_B-cells_patient-C6_Up
GO Biological Processes	19	GO:0032570	response to progesterone	19_GO:0050896 response to stimulus	-3.4	21	7.5	30182	40	110	3	2.7	1.6	706|952|2821	TSPO|CD38|GPI	-2	RNA_Wilk_B-cells_patient-C6_Up
GO Biological Processes	19	GO:0072521	purine-containing compound metabolic process	19_GO:0008152 metabolic process	-3.4	4.5	4.7	30182	487	110	8	7.3	2.5	952|2597|2821|3939|5226|6888|7086|55711	CD38|GAPDH|GPI|LDHA|PGD|TALDO1|TKT|FAR2	-2	RNA_Wilk_B-cells_patient-C6_Up
GO Biological Processes	19	GO:0045088	regulation of innate immune response	19_GO:0044419 biological process involved in interspecies interaction between organisms	-3.4	5.1	4.9	30182	373	110	7	6.4	2.3	383|634|2896|4057|4332|9636|58484	ARG1|CEACAM1|GRN|LTF|MNDA|ISG15|NLRC4	-2	RNA_Wilk_B-cells_patient-C6_Up
GO Biological Processes	19	GO:0022407	regulation of cell-cell adhesion	19_GO:0050789 regulation of biological process	-3.4	4.5	4.7	30182	491	110	8	7.3	2.5	301|383|634|1432|1511|1991|4680|7494	ANXA1|ARG1|CEACAM1|MAPK14|CTSG|ELANE|CEACAM6|XBP1	-2	RNA_Wilk_B-cells_patient-C6_Up
GO Biological Processes	19	GO:0150077	regulation of neuroinflammatory response	19_GO:0050896 response to stimulus	-3.3	20	7.4	30182	41	110	3	2.7	1.6	2896|4317|8530	GRN|MMP8|CST7	-1.9	RNA_Wilk_B-cells_patient-C6_Up
GO Biological Processes	19	GO:0055080	monoatomic cation homeostasis	19_GO:0042592 homeostatic process	-3.3	4.4	4.7	30182	495	110	8	7.3	2.5	351|1991|2896|3934|4057|6279|6280|118987	APP|ELANE|GRN|LCN2|LTF|S100A8|S100A9|PDZD8	-1.9	RNA_Wilk_B-cells_patient-C6_Up
GO Biological Processes	19	GO:0010634	positive regulation of epithelial cell migration	19_GO:0040011 locomotion	-3.3	7.8	5.5	30182	176	110	5	4.5	2	301|306|2821|2896|8660	ANXA1|ANXA3|GPI|GRN|IRS2	-1.9	RNA_Wilk_B-cells_patient-C6_Up
GO Biological Processes	19	GO:0046916	cellular transition metal ion homeostasis	19_GO:0042592 homeostatic process	-3.3	11	6.1	30182	99	110	4	3.6	1.8	351|3934|6279|6280	APP|LCN2|S100A8|S100A9	-1.9	RNA_Wilk_B-cells_patient-C6_Up
Reactome Gene Sets	6	R-HSA-2173782	Binding and Uptake of Ligands by Scavenger Receptors		-3.3	20	7.3	30182	42	110	3	2.7	1.6	3040|3043|3240	HBA2|HBB|HP	-1.9	RNA_Wilk_B-cells_patient-C6_Up
GO Biological Processes	19	GO:0031663	lipopolysaccharide-mediated signaling pathway	19_GO:0044419 biological process involved in interspecies interaction between organisms	-3.3	20	7.3	30182	42	110	3	2.7	1.6	671|1432|92140	BPI|MAPK14|MTDH	-1.9	RNA_Wilk_B-cells_patient-C6_Up
GO Biological Processes	19	GO:0005996	monosaccharide metabolic process	19_GO:0008152 metabolic process	-3.3	7.8	5.4	30182	177	110	5	4.5	2	1432|2597|2821|5226|8660	MAPK14|GAPDH|GPI|PGD|IRS2	-1.9	RNA_Wilk_B-cells_patient-C6_Up
GO Biological Processes	19	GO:0032787	monocarboxylic acid metabolic process	19_GO:0008152 metabolic process	-3.3	4.4	4.6	30182	498	110	8	7.3	2.5	241|1432|2597|2821|3939|5226|6319|7494	ALOX5AP|MAPK14|GAPDH|GPI|LDHA|PGD|SCD|XBP1	-1.9	RNA_Wilk_B-cells_patient-C6_Up
GO Biological Processes	19	GO:0032755	positive regulation of interleukin-6 production	19_GO:0048518 positive regulation of biological process	-3.3	11	6	30182	100	110	4	3.6	1.8	351|4317|7494|23765	APP|MMP8|XBP1|IL17RA	-1.9	RNA_Wilk_B-cells_patient-C6_Up
GO Biological Processes	19	GO:0010631	epithelial cell migration	19_GO:0032501 multicellular organismal process	-3.3	11	6	30182	100	110	4	3.6	1.8	6280|6286|8660|54443	S100A9|S100P|IRS2|ANLN	-1.9	RNA_Wilk_B-cells_patient-C6_Up
GO Biological Processes	19	GO:0032675	regulation of interleukin-6 production	19_GO:0032501 multicellular organismal process	-3.3	7.7	5.4	30182	178	110	5	4.5	2	351|671|4317|7494|23765	APP|BPI|MMP8|XBP1|IL17RA	-1.9	RNA_Wilk_B-cells_patient-C6_Up
GO Biological Processes	19	GO:0051046	regulation of secretion	19_GO:0051179 localization	-3.3	3.9	4.5	30182	631	110	9	8.2	2.6	301|634|706|952|5873|6279|7494|8660|56729	ANXA1|CEACAM1|TSPO|CD38|RAB27A|S100A8|XBP1|IRS2|RETN	-1.9	RNA_Wilk_B-cells_patient-C6_Up
GO Biological Processes	19	GO:0097530	granulocyte migration	19_GO:0002376 immune system process	-3.3	11	6	30182	101	110	4	3.6	1.8	301|6279|6280|23765	ANXA1|S100A8|S100A9|IL17RA	-1.9	RNA_Wilk_B-cells_patient-C6_Up
GO Biological Processes	19	GO:0006096	glycolytic process	19_GO:0008152 metabolic process	-3.3	19	7.2	30182	43	110	3	2.7	1.6	2597|2821|3939	GAPDH|GPI|LDHA	-1.9	RNA_Wilk_B-cells_patient-C6_Up
GO Biological Processes	19	GO:0030501	positive regulation of bone mineralization	19_GO:0032502 developmental process	-3.3	19	7.2	30182	43	110	3	2.7	1.6	4057|9636|55603	LTF|ISG15|TENT5A	-1.9	RNA_Wilk_B-cells_patient-C6_Up
KEGG Pathway	24	hsa05146	Amoebiasis		-3.3	11	6	30182	102	110	4	3.6	1.8	87|383|1511|5273	ACTN1|ARG1|CTSG|SERPINB10	-1.9	RNA_Wilk_B-cells_patient-C6_Up
GO Biological Processes	19	GO:0050801	monoatomic ion homeostasis	19_GO:0042592 homeostatic process	-3.3	4.3	4.6	30182	507	110	8	7.3	2.5	351|1991|2896|3934|4057|6279|6280|118987	APP|ELANE|GRN|LCN2|LTF|S100A8|S100A9|PDZD8	-1.9	RNA_Wilk_B-cells_patient-C6_Up
GO Biological Processes	19	GO:0006757	ATP generation from ADP	19_GO:0008152 metabolic process	-3.3	19	7.1	30182	44	110	3	2.7	1.6	2597|2821|3939	GAPDH|GPI|LDHA	-1.9	RNA_Wilk_B-cells_patient-C6_Up
GO Biological Processes	19	GO:0032677	regulation of interleukin-8 production	19_GO:0032501 multicellular organismal process	-3.3	11	5.9	30182	103	110	4	3.6	1.8	301|671|1116|1991	ANXA1|BPI|CHI3L1|ELANE	-1.9	RNA_Wilk_B-cells_patient-C6_Up
GO Biological Processes	19	GO:0090132	epithelium migration	19_GO:0032501 multicellular organismal process	-3.3	11	5.9	30182	103	110	4	3.6	1.8	6280|6286|8660|54443	S100A9|S100P|IRS2|ANLN	-1.9	RNA_Wilk_B-cells_patient-C6_Up
GO Biological Processes	19	GO:0002252	immune effector process	19_GO:0002376 immune system process	-3.2	4.9	4.7	30182	389	110	7	6.4	2.3	306|351|1511|1991|2896|4353|5873	ANXA3|APP|CTSG|ELANE|GRN|MPO|RAB27A	-1.9	RNA_Wilk_B-cells_patient-C6_Up
GO Biological Processes	19	GO:0032680	regulation of tumor necrosis factor production	19_GO:0032501 multicellular organismal process	-3.2	7.4	5.3	30182	185	110	5	4.5	2	351|671|706|4057|4317	APP|BPI|TSPO|LTF|MMP8	-1.9	RNA_Wilk_B-cells_patient-C6_Up
GO Biological Processes	19	GO:0009117	nucleotide metabolic process	19_GO:0008152 metabolic process	-3.2	4.3	4.5	30182	515	110	8	7.3	2.5	952|2597|2821|3939|5226|6888|7086|55711	CD38|GAPDH|GPI|LDHA|PGD|TALDO1|TKT|FAR2	-1.9	RNA_Wilk_B-cells_patient-C6_Up
GO Biological Processes	19	GO:0050728	negative regulation of inflammatory response	19_GO:0048519 negative regulation of biological process	-3.2	7.3	5.3	30182	187	110	5	4.5	2	1432|1991|2896|8530|8993	MAPK14|ELANE|GRN|CST7|PGLYRP1	-1.9	RNA_Wilk_B-cells_patient-C6_Up
GO Biological Processes	19	GO:0022617	extracellular matrix disassembly	19_GO:0009987 cellular process	-3.2	18	6.9	30182	46	110	3	2.7	1.6	1511|1991|4317	CTSG|ELANE|MMP8	-1.8	RNA_Wilk_B-cells_patient-C6_Up
GO Biological Processes	19	GO:0010721	negative regulation of cell development	19_GO:0032502 developmental process	-3.2	5.8	4.9	30182	286	110	6	5.5	2.2	301|634|706|4057|8993|359845	ANXA1|CEACAM1|TSPO|LTF|PGLYRP1|RFLNB	-1.8	RNA_Wilk_B-cells_patient-C6_Up
GO Biological Processes	19	GO:1903555	regulation of tumor necrosis factor superfamily cytokine production	19_GO:0032501 multicellular organismal process	-3.2	7.2	5.2	30182	190	110	5	4.5	2	351|671|706|4057|4317	APP|BPI|TSPO|LTF|MMP8	-1.8	RNA_Wilk_B-cells_patient-C6_Up
KEGG Pathway	24	hsa04613	Neutrophil extracellular trap formation		-3.2	7.2	5.2	30182	190	110	5	4.5	2	820|1432|1511|1991|4353	CAMP|MAPK14|CTSG|ELANE|MPO	-1.8	RNA_Wilk_B-cells_patient-C6_Up
GO Biological Processes	19	GO:0006753	nucleoside phosphate metabolic process	19_GO:0008152 metabolic process	-3.2	4.2	4.5	30182	523	110	8	7.3	2.5	952|2597|2821|3939|5226|6888|7086|55711	CD38|GAPDH|GPI|LDHA|PGD|TALDO1|TKT|FAR2	-1.8	RNA_Wilk_B-cells_patient-C6_Up
GO Biological Processes	19	GO:0090130	tissue migration	19_GO:0032501 multicellular organismal process	-3.2	10	5.7	30182	109	110	4	3.6	1.8	6280|6286|8660|54443	S100A9|S100P|IRS2|ANLN	-1.8	RNA_Wilk_B-cells_patient-C6_Up
GO Biological Processes	19	GO:1902106	negative regulation of leukocyte differentiation	19_GO:0002376 immune system process	-3.2	10	5.7	30182	109	110	4	3.6	1.8	301|634|4057|8993	ANXA1|CEACAM1|LTF|PGLYRP1	-1.8	RNA_Wilk_B-cells_patient-C6_Up
GO Biological Processes	19	GO:0030003	cellular monoatomic cation homeostasis	19_GO:0042592 homeostatic process	-3.2	4.8	4.6	30182	403	110	7	6.4	2.3	351|1991|2896|3934|6279|6280|118987	APP|ELANE|GRN|LCN2|S100A8|S100A9|PDZD8	-1.8	RNA_Wilk_B-cells_patient-C6_Up
Reactome Gene Sets	6	R-HSA-977225	Amyloid fiber formation		-3.1	9.9	5.7	30182	111	110	4	3.6	1.8	351|2934|4057|4069	APP|GSN|LTF|LYZ	-1.8	RNA_Wilk_B-cells_patient-C6_Up
GO Biological Processes	19	GO:0071674	mononuclear cell migration	19_GO:0002376 immune system process	-3.1	9.9	5.7	30182	111	110	4	3.6	1.8	301|1511|1667|728358	ANXA1|CTSG|DEFA1|DEFA1B	-1.8	RNA_Wilk_B-cells_patient-C6_Up
GO Biological Processes	19	GO:0032651	regulation of interleukin-1 beta production	19_GO:0032501 multicellular organismal process	-3.1	9.8	5.6	30182	112	110	4	3.6	1.8	351|1992|4332|58484	APP|SERPINB1|MNDA|NLRC4	-1.8	RNA_Wilk_B-cells_patient-C6_Up
GO Biological Processes	19	GO:0010043	response to zinc ion	19_GO:0050896 response to stimulus	-3.1	17	6.7	30182	49	110	3	2.7	1.6	383|706|6279	ARG1|TSPO|S100A8	-1.8	RNA_Wilk_B-cells_patient-C6_Up
GO Biological Processes	19	GO:0016485	protein processing	19_GO:0008152 metabolic process	-3.1	7	5.1	30182	196	110	5	4.5	2	317|1511|5034|5552|58484	APAF1|CTSG|P4HB|SRGN|NLRC4	-1.8	RNA_Wilk_B-cells_patient-C6_Up
GO Biological Processes	19	GO:0055065	metal ion homeostasis	19_GO:0042592 homeostatic process	-3.1	4.7	4.5	30182	410	110	7	6.4	2.3	351|1991|3934|4057|6279|6280|118987	APP|ELANE|LCN2|LTF|S100A8|S100A9|PDZD8	-1.8	RNA_Wilk_B-cells_patient-C6_Up
GO Biological Processes	19	GO:0006091	generation of precursor metabolites and energy	19_GO:0008152 metabolic process	-3.1	4.7	4.5	30182	410	110	7	6.4	2.3	2597|2821|3939|5226|5836|6888|7086	GAPDH|GPI|LDHA|PGD|PYGL|TALDO1|TKT	-1.8	RNA_Wilk_B-cells_patient-C6_Up
GO Biological Processes	19	GO:0006873	cellular monoatomic ion homeostasis	19_GO:0042592 homeostatic process	-3.1	4.7	4.5	30182	412	110	7	6.4	2.3	351|1991|2896|3934|6279|6280|118987	APP|ELANE|GRN|LCN2|S100A8|S100A9|PDZD8	-1.8	RNA_Wilk_B-cells_patient-C6_Up
Reactome Gene Sets	6	R-HSA-5653656	Vesicle-mediated transport		-3.1	3.7	4.2	30182	673	110	9	8.2	2.6	351|966|1062|3040|3043|3240|5873|6272|11031	APP|CD59|CENPE|HBA2|HBB|HP|RAB27A|SORT1|RAB31	-1.8	RNA_Wilk_B-cells_patient-C6_Up
GO Biological Processes	19	GO:0042304	regulation of fatty acid biosynthetic process	19_GO:0008152 metabolic process	-3.1	16	6.6	30182	50	110	3	2.7	1.6	301|634|10613	ANXA1|CEACAM1|ERLIN1	-1.8	RNA_Wilk_B-cells_patient-C6_Up
GO Biological Processes	19	GO:1903706	regulation of hemopoiesis	19_GO:0002376 immune system process	-3.1	4.6	4.5	30182	415	110	7	6.4	2.3	301|634|1432|4057|7494|8993|9636	ANXA1|CEACAM1|MAPK14|LTF|XBP1|PGLYRP1|ISG15	-1.8	RNA_Wilk_B-cells_patient-C6_Up
GO Biological Processes	19	GO:1903707	negative regulation of hemopoiesis	19_GO:0002376 immune system process	-3.1	9.5	5.6	30182	115	110	4	3.6	1.8	301|634|4057|8993	ANXA1|CEACAM1|LTF|PGLYRP1	-1.8	RNA_Wilk_B-cells_patient-C6_Up
GO Biological Processes	19	GO:0045778	positive regulation of ossification	19_GO:0048518 positive regulation of biological process	-3.1	16	6.5	30182	51	110	3	2.7	1.6	4057|9636|55603	LTF|ISG15|TENT5A	-1.8	RNA_Wilk_B-cells_patient-C6_Up
Canonical Pathways	11	M220	PID CASPASE PATHWAY		-3.1	16	6.5	30182	51	110	3	2.7	1.6	317|351|2934	APAF1|APP|GSN	-1.8	RNA_Wilk_B-cells_patient-C6_Up
GO Biological Processes	19	GO:0006006	glucose metabolic process	19_GO:0008152 metabolic process	-3.1	9.5	5.5	30182	116	110	4	3.6	1.8	1432|2597|2821|8660	MAPK14|GAPDH|GPI|IRS2	-1.8	RNA_Wilk_B-cells_patient-C6_Up
GO Biological Processes	19	GO:0046031	ADP metabolic process	19_GO:0008152 metabolic process	-3	16	6.5	30182	52	110	3	2.7	1.6	2597|2821|3939	GAPDH|GPI|LDHA	-1.8	RNA_Wilk_B-cells_patient-C6_Up
GO Biological Processes	19	GO:0070169	positive regulation of biomineral tissue development	19_GO:0032502 developmental process	-3	16	6.4	30182	53	110	3	2.7	1.6	4057|9636|55603	LTF|ISG15|TENT5A	-1.7	RNA_Wilk_B-cells_patient-C6_Up
GO Biological Processes	19	GO:1901653	cellular response to peptide	19_GO:0050896 response to stimulus	-3	5.3	4.6	30182	310	110	6	5.5	2.2	351|383|634|7494|8660|11031	APP|ARG1|CEACAM1|XBP1|IRS2|RAB31	-1.7	RNA_Wilk_B-cells_patient-C6_Up
GO Biological Processes	19	GO:0034614	cellular response to reactive oxygen species	19_GO:0050896 response to stimulus	-3	9.1	5.4	30182	121	110	4	3.6	1.8	301|383|4353|25824	ANXA1|ARG1|MPO|PRDX5	-1.7	RNA_Wilk_B-cells_patient-C6_Up
GO Biological Processes	19	GO:0098771	inorganic ion homeostasis	19_GO:0042592 homeostatic process	-3	4.4	4.4	30182	433	110	7	6.4	2.3	351|1991|3934|4057|6279|6280|118987	APP|ELANE|LCN2|LTF|S100A8|S100A9|PDZD8	-1.7	RNA_Wilk_B-cells_patient-C6_Up
GO Biological Processes	19	GO:0030518	intracellular steroid hormone receptor signaling pathway	19_GO:0023052 signaling	-3	15	6.3	30182	55	110	3	2.7	1.6	1667|1668|728358	DEFA1|DEFA3|DEFA1B	-1.7	RNA_Wilk_B-cells_patient-C6_Up
GO Biological Processes	19	GO:0051047	positive regulation of secretion	19_GO:0051179 localization	-3	5.2	4.5	30182	316	110	6	5.5	2.2	952|5873|6279|7494|8660|56729	CD38|RAB27A|S100A8|XBP1|IRS2|RETN	-1.7	RNA_Wilk_B-cells_patient-C6_Up
GO Biological Processes	19	GO:0051345	positive regulation of hydrolase activity	19_GO:0065007 biological regulation	-2.9	3.9	4.2	30182	569	110	8	7.3	2.5	317|1509|2896|2934|6279|6280|58484|266747	APAF1|CTSD|GRN|GSN|S100A8|S100A9|NLRC4|RGL4	-1.7	RNA_Wilk_B-cells_patient-C6_Up
GO Biological Processes	19	GO:0006875	cellular metal ion homeostasis	19_GO:0042592 homeostatic process	-2.9	5.1	4.5	30182	322	110	6	5.5	2.2	351|1991|3934|6279|6280|118987	APP|ELANE|LCN2|S100A8|S100A9|PDZD8	-1.7	RNA_Wilk_B-cells_patient-C6_Up
Reactome Gene Sets	6	R-HSA-168643	Nucleotide-binding domain, leucine rich repeat containing receptor (NLR) signaling pathways		-2.9	14	6.1	30182	57	110	3	2.7	1.6	351|1432|58484	APP|MAPK14|NLRC4	-1.7	RNA_Wilk_B-cells_patient-C6_Up
GO Biological Processes	19	GO:0044283	small molecule biosynthetic process	19_GO:0008152 metabolic process	-2.9	4.3	4.3	30182	443	110	7	6.4	2.3	241|2821|4353|5226|6319|7494|58484	ALOX5AP|GPI|MPO|PGD|SCD|XBP1|NLRC4	-1.7	RNA_Wilk_B-cells_patient-C6_Up
GO Biological Processes	19	GO:0045596	negative regulation of cell differentiation	19_GO:0032502 developmental process	-2.9	3.4	4	30182	716	110	9	8.2	2.6	301|351|634|706|4057|6272|7494|8993|359845	ANXA1|APP|CEACAM1|TSPO|LTF|SORT1|XBP1|PGLYRP1|RFLNB	-1.7	RNA_Wilk_B-cells_patient-C6_Up
Reactome Gene Sets	6	R-HSA-195258	RHO GTPase Effectors		-2.9	5	4.4	30182	327	110	6	5.5	2.2	1062|1063|1432|4637|6279|6280	CENPE|CENPF|MAPK14|MYL6|S100A8|S100A9	-1.7	RNA_Wilk_B-cells_patient-C6_Up
Reactome Gene Sets	6	R-HSA-114608	Platelet degranulation		-2.9	8.5	5.2	30182	129	110	4	3.6	1.8	87|351|967|5552	ACTN1|APP|CD63|SRGN	-1.7	RNA_Wilk_B-cells_patient-C6_Up
GO Biological Processes	19	GO:0050864	regulation of B cell activation	19_GO:0002376 immune system process	-2.9	8.4	5.1	30182	130	110	4	3.6	1.8	952|4332|7494|8660	CD38|MNDA|XBP1|IRS2	-1.6	RNA_Wilk_B-cells_patient-C6_Up
GO Biological Processes	19	GO:0045321	leukocyte activation	19_GO:0002376 immune system process	-2.9	3.8	4.1	30182	584	110	8	7.3	2.5	301|306|351|820|952|1511|2896|5873	ANXA1|ANXA3|APP|CAMP|CD38|CTSG|GRN|RAB27A	-1.6	RNA_Wilk_B-cells_patient-C6_Up
GO Biological Processes	19	GO:0062012	regulation of small molecule metabolic process	19_GO:0008152 metabolic process	-2.9	5	4.4	30182	331	110	6	5.5	2.2	301|351|634|706|8660|10613	ANXA1|APP|CEACAM1|TSPO|IRS2|ERLIN1	-1.6	RNA_Wilk_B-cells_patient-C6_Up
GO Biological Processes	19	GO:0010595	positive regulation of endothelial cell migration	19_GO:0040011 locomotion	-2.9	8.4	5.1	30182	131	110	4	3.6	1.8	301|306|2821|2896	ANXA1|ANXA3|GPI|GRN	-1.6	RNA_Wilk_B-cells_patient-C6_Up
GO Biological Processes	19	GO:0050868	negative regulation of T cell activation	19_GO:0002376 immune system process	-2.9	8.4	5.1	30182	131	110	4	3.6	1.8	301|383|634|1511	ANXA1|ARG1|CEACAM1|CTSG	-1.6	RNA_Wilk_B-cells_patient-C6_Up
GO Biological Processes	19	GO:0002444	myeloid leukocyte mediated immunity	19_GO:0002376 immune system process	-2.9	14	6	30182	60	110	3	2.7	1.6	306|1511|1991	ANXA3|CTSG|ELANE	-1.6	RNA_Wilk_B-cells_patient-C6_Up
GO Biological Processes	19	GO:0001909	leukocyte mediated cytotoxicity	19_GO:0002376 immune system process	-2.9	14	6	30182	60	110	3	2.7	1.6	1511|1991|5873	CTSG|ELANE|RAB27A	-1.6	RNA_Wilk_B-cells_patient-C6_Up
GO Biological Processes	19	GO:0006165	nucleoside diphosphate phosphorylation	19_GO:0008152 metabolic process	-2.9	14	6	30182	60	110	3	2.7	1.6	2597|2821|3939	GAPDH|GPI|LDHA	-1.6	RNA_Wilk_B-cells_patient-C6_Up
KEGG Pathway	24	hsa04142	Lysosome		-2.9	8.3	5.1	30182	132	110	4	3.6	1.8	967|1509|1511|6272	CD63|CTSD|CTSG|SORT1	-1.6	RNA_Wilk_B-cells_patient-C6_Up
GO Biological Processes	19	GO:1900024	regulation of substrate adhesion-dependent cell spreading	19_GO:0050789 regulation of biological process	-2.8	13	5.9	30182	61	110	3	2.7	1.6	4070|5034|10562	TACSTD2|P4HB|OLFM4	-1.6	RNA_Wilk_B-cells_patient-C6_Up
GO Biological Processes	19	GO:0055086	nucleobase-containing small molecule metabolic process	19_GO:0008152 metabolic process	-2.8	3.7	4	30182	590	110	8	7.3	2.5	952|2597|2821|3939|5226|6888|7086|55711	CD38|GAPDH|GPI|LDHA|PGD|TALDO1|TKT|FAR2	-1.6	RNA_Wilk_B-cells_patient-C6_Up
Reactome Gene Sets	6	R-HSA-76005	Response to elevated platelet cytosolic Ca2+		-2.8	8.2	5	30182	134	110	4	3.6	1.8	87|351|967|5552	ACTN1|APP|CD63|SRGN	-1.6	RNA_Wilk_B-cells_patient-C6_Up
GO Biological Processes	19	GO:0045428	regulation of nitric oxide biosynthetic process	19_GO:0008152 metabolic process	-2.8	13	5.9	30182	62	110	3	2.7	1.6	706|3043|4317	TSPO|HBB|MMP8	-1.6	RNA_Wilk_B-cells_patient-C6_Up
GO Biological Processes	19	GO:0046939	nucleotide phosphorylation	19_GO:0008152 metabolic process	-2.8	13	5.9	30182	62	110	3	2.7	1.6	2597|2821|3939	GAPDH|GPI|LDHA	-1.6	RNA_Wilk_B-cells_patient-C6_Up
GO Biological Processes	19	GO:0010565	regulation of cellular ketone metabolic process	19_GO:0008152 metabolic process	-2.8	8.1	5	30182	135	110	4	3.6	1.8	301|634|8660|10613	ANXA1|CEACAM1|IRS2|ERLIN1	-1.6	RNA_Wilk_B-cells_patient-C6_Up
[truncated: 997 more rows]
