# Supplementary material for: Methylation patterns of the nasal epigenome of hospitalized SARS-CoV-2 positive patients reveal insights into molecular mechanisms of COVID-19
Source: Research Square preprint supplement (doi:10.21203/rs.3.rs-5026887/v1), 2024-10-22
Supplement: Supplementary file 3 [file c91fdcca42dfce4c4555d837.xlsx]

## Sheet: SupplementalTable3A_Coronascape
Category	CategoryID	GO	Description	PARENT_GO	LogP	Enrichment	Z-score	#TotalGeneInLibrary	#GeneInGO	#GeneInHitList	#GeneInGOAndHitList	%InGO	STDV %InGO	GeneID	Hits	Log(q-value)	GeneList
GO Biological Processes	19	GO:0048598	embryonic morphogenesis	19_GO:0032502 developmental process	-7	3.1	6.5	30182	581	486	29	6	1.1	1750|2116|2304|2535|2768|3142|3213|3638|3689|3690|4851|6469|6615|6909|7020|7479|10522|23272|27443|29985|51098|51676|55578|64220|79191|79192|83595|151449|642658	DLX6|ETV2|FOXE1|FZD2|GNA12|HLX|HOXB3|INSIG1|ITGB2|ITGB3|NOTCH1|SHH|SNAI1|TBX2|TFAP2A|WNT8B|DEAF1|TASOR|CECR2|SLC39A3|IFT52|ASB2|SUPT20H|STRA6|IRX3|IRX1|SOX7|GDF7|SCX	-4.9	MyList
KEGG Pathway	24	hsa05168	Herpes simplex virus 1 infection		-5.9	3	5.9	30182	512	486	25	5.1	1	207|598|637|3111|3113|3665|3690|4792|7748|7770|8893|10189|55552|90987|115004|126068|148203|163050|199692|256051|285267|344787|346171|440515|100289635	AKT1|BCL2L1|BID|HLA-DOA|HLA-DPA1|IRF7|ITGB3|NFKBIA|ZNF195|ZNF227|EIF2B5|ALYREF|ZNF823|ZNF251|CGAS|ZNF441|ZNF738|ZNF564|ZNF627|ZNF549|ZNF619|ZNF860|ZFP57|ZNF506|ZNF605	-3.9	MyList
GO Biological Processes	19	GO:0035239	tube morphogenesis	19_GO:0032502 developmental process	-5.7	2.7	5.7	30182	670	486	29	6	1.1	207|290|2116|2324|2535|3142|3213|3690|4846|4851|6469|6909|7075|7453|10522|10672|27329|27443|51098|51162|51378|51676|64220|79191|79192|79924|84700|151449|170690	AKT1|ANPEP|ETV2|FLT4|FZD2|HLX|HOXB3|ITGB3|NOS3|NOTCH1|SHH|TBX2|TIE1|WARS1|DEAF1|GNA13|ANGPTL3|CECR2|IFT52|EGFL7|ANGPT4|ASB2|STRA6|IRX3|IRX1|ADM2|MYO18B|GDF7|ADAMTS16	-3.8	MyList
GO Biological Processes	19	GO:0043009	chordate embryonic development	19_GO:0032502 developmental process	-5.6	2.7	5.5	30182	648	486	28	5.8	1.1	207|598|1050|2116|2535|2768|3213|4242|4846|4851|6469|6615|7020|7075|10522|10672|26173|27443|29985|51098|53615|64359|84172|84700|151449|343263|387733|642658	AKT1|BCL2L1|CEBPA|ETV2|FZD2|GNA12|HOXB3|MFNG|NOS3|NOTCH1|SHH|SNAI1|TFAP2A|TIE1|DEAF1|GNA13|INTS1|CECR2|SLC39A3|IFT52|MBD3|NXN|POLR1B|MYO18B|GDF7|MYBPHL|IFITM5|SCX	-3.6	MyList
GO Biological Processes	19	GO:0034504	protein localization to nucleus	19_GO:0051179 localization	-5.5	4.6	6.3	30182	191	486	14	2.9	0.76	207|1861|2516|3087|4792|4851|5903|6469|6794|7507|23353|23511|23534|23633	AKT1|TOR1A|NR5A1|HHEX|NFKBIA|NOTCH1|RANBP2|SHH|STK11|XPA|SUN1|NUP188|TNPO3|KPNA6	-3.6	MyList
GO Biological Processes	19	GO:0009792	embryo development ending in birth or egg hatching	19_GO:0032502 developmental process	-5.3	2.6	5.3	30182	670	486	28	5.8	1.1	207|598|1050|2116|2535|2768|3213|4242|4846|4851|6469|6615|7020|7075|10522|10672|26173|27443|29985|51098|53615|64359|84172|84700|151449|343263|387733|642658	AKT1|BCL2L1|CEBPA|ETV2|FZD2|GNA12|HOXB3|MFNG|NOS3|NOTCH1|SHH|SNAI1|TFAP2A|TIE1|DEAF1|GNA13|INTS1|CECR2|SLC39A3|IFT52|MBD3|NXN|POLR1B|MYO18B|GDF7|MYBPHL|IFITM5|SCX	-3.4	MyList
GO Biological Processes	19	GO:0061061	muscle structure development	19_GO:0032502 developmental process	-5	2.8	5.3	30182	504	486	23	4.7	0.96	207|577|1310|1793|2274|2535|3142|4851|6469|6546|6909|8038|9242|10529|22801|51676|53834|63950|64220|79191|81029|84700|642658	AKT1|ADGRB3|COL19A1|DOCK1|FHL2|FZD2|HLX|NOTCH1|SHH|SLC8A1|TBX2|ADAM12|MSC|NEBL|ITGA11|ASB2|FGFRL1|DMRTA2|STRA6|IRX3|WNT5B|MYO18B|SCX	-3.2	MyList
GO Biological Processes	19	GO:0060021	roof of mouth development	19_GO:0032502 developmental process	-4.8	6.1	6.3	30182	91	486	9	1.9	0.61	1750|2304|2535|3638|6469|6615|6909|7020|9242	DLX6|FOXE1|FZD2|INSIG1|SHH|SNAI1|TBX2|TFAP2A|MSC	-3	MyList
GO Biological Processes	19	GO:0098609	cell-cell adhesion	19_GO:0009987 cellular process	-4.7	2.7	5	30182	531	486	23	4.7	0.96	923|999|1310|3556|3689|3690|3875|7430|8404|9378|10627|22801|22918|27032|27134|29119|29851|53834|56097|56121|79633|84063|653499	CD6|CDH1|COL19A1|IL1RAP|ITGB2|ITGB3|KRT18|EZR|SPARCL1|NRXN1|MYL12A|ITGA11|CD93|ATP2C1|TJP3|CTNNA3|ICOS|FGFRL1|PCDHGC5|PCDHB15|FAT4|KIRREL2|LGALS7B	-2.9	MyList
GO Biological Processes	19	GO:0030111	regulation of Wnt signaling pathway	19_GO:0023052 signaling	-4.4	3.1	5	30182	338	486	17	3.5	0.83	3087|4851|6469|6794|8994|9839|10297|23500|55716|56033|64359|81029|83595|83786|85409|130574|151195	HHEX|NOTCH1|SHH|STK11|LIMD1|ZEB2|APC2|DAAM2|LMBR1L|BARX1|NXN|WNT5B|SOX7|FRMD8|NKD2|LYPD6|CCNYL1	-2.7	MyList
GO Biological Processes	19	GO:0007389	pattern specification process	19_GO:0032502 developmental process	-4.3	2.8	4.8	30182	448	486	20	4.1	0.9	3087|3213|4242|4851|6469|6615|6909|7479|10297|22856|23272|23500|25914|51098|51676|55079|56033|63950|79191|79192	HHEX|HOXB3|MFNG|NOTCH1|SHH|SNAI1|TBX2|WNT8B|APC2|CHSY1|TASOR|DAAM2|RTTN|IFT52|ASB2|FEZF2|BARX1|DMRTA2|IRX3|IRX1	-2.6	MyList
GO Biological Processes	19	GO:0003179	heart valve morphogenesis	19_GO:0032502 developmental process	-4.3	7.2	6.2	30182	60	486	7	1.4	0.54	4846|4851|6615|7075|53834|64220|642658	NOS3|NOTCH1|SNAI1|TIE1|FGFRL1|STRA6|SCX	-2.6	MyList
GO Biological Processes	19	GO:0001503	ossification	19_GO:0032501 multicellular organismal process	-4.3	3.4	5	30182	278	486	15	3.1	0.78	207|249|632|2274|4330|6469|6615|8482|8994|9770|10189|22801|56172|387733|642658	AKT1|ALPL|BGLAP|FHL2|MN1|SHH|SNAI1|SEMA7A|LIMD1|RASSF2|ALYREF|ITGA11|ANKH|IFITM5|SCX	-2.6	MyList
GO Biological Processes	19	GO:0001819	positive regulation of cytokine production	19_GO:0048518 positive regulation of biological process	-4.3	2.7	4.8	30182	489	486	21	4.3	0.92	916|923|2324|3098|3113|3394|3556|3572|3665|4063|4860|7100|7349|8482|9466|9636|23633|30009|79132|83786|115004	CD3E|CD6|FLT4|HK1|HLA-DPA1|IRF8|IL1RAP|IL6ST|IRF7|LY9|PNP|TLR5|UCN|SEMA7A|IL27RA|ISG15|KPNA6|TBX21|DHX58|FRMD8|CGAS	-2.6	MyList
GO Biological Processes	19	GO:0048729	tissue morphogenesis	19_GO:0032502 developmental process	-4.3	2.5	4.7	30182	566	486	23	4.7	0.96	1861|2116|2304|2535|3690|4846|4851|6469|6615|6909|7020|7075|10522|10672|23616|27443|51098|51676|79191|79192|151449|170690|642658	TOR1A|ETV2|FOXE1|FZD2|ITGB3|NOS3|NOTCH1|SHH|SNAI1|TBX2|TFAP2A|TIE1|DEAF1|GNA13|SH3BP1|CECR2|IFT52|ASB2|IRX3|IRX1|GDF7|ADAMTS16|SCX	-2.6	MyList
GO Biological Processes	19	GO:0016125	sterol metabolic process	19_GO:0008152 metabolic process	-4.2	4.7	5.5	30182	132	486	10	2.1	0.64	1050|1071|1592|2224|3638|8578|10449|27329|91734|114876	CEBPA|CETP|CYP26A1|FDPS|INSIG1|SCARF1|ACAA2|ANGPTL3|IDI2|OSBPL1A	-2.6	MyList
KEGG Pathway	24	hsa05200	Pathways in cancer		-4.2	2.6	4.7	30182	531	486	22	4.5	0.94	207|598|637|999|1050|2324|2535|2768|3572|4792|4851|5582|6469|6923|7185|7428|7479|10297|10672|27006|29119|81029	AKT1|BCL2L1|BID|CDH1|CEBPA|FLT4|FZD2|GNA12|IL6ST|NFKBIA|NOTCH1|PRKCG|SHH|ELOB|TRAF1|VHL|WNT8B|APC2|GNA13|FGF22|CTNNA3|WNT5B	-2.5	MyList
GO Biological Processes	19	GO:0048514	blood vessel morphogenesis	19_GO:0032502 developmental process	-4.2	2.8	4.8	30182	422	486	19	3.9	0.88	207|290|2116|2324|3213|3690|4846|4851|6469|6909|7075|7453|10672|27329|51162|51378|64220|79924|84700	AKT1|ANPEP|ETV2|FLT4|HOXB3|ITGB3|NOS3|NOTCH1|SHH|TBX2|TIE1|WARS1|GNA13|ANGPTL3|EGFL7|ANGPT4|STRA6|ADM2|MYO18B	-2.5	MyList
KEGG Pathway	24	hsa04659	Th17 cell differentiation		-4.2	5.2	5.6	30182	108	486	9	1.9	0.61	916|3111|3113|3556|3572|4792|9466|27040|30009	CD3E|HLA-DOA|HLA-DPA1|IL1RAP|IL6ST|NFKBIA|IL27RA|LAT|TBX21	-2.5	MyList
GO Biological Processes	19	GO:0032774	RNA biosynthetic process	19_GO:0008152 metabolic process	-4.2	2.4	4.6	30182	612	486	24	4.9	0.98	1050|2274|2354|3172|4851|5442|5558|6923|7428|8204|8458|9014|9839|9967|10302|10522|23633|51106|55578|55818|58160|84172|112495|642658	CEBPA|FHL2|FOSB|HNF4A|NOTCH1|POLRMT|PRIM2|ELOB|VHL|NRIP1|TTF2|TAF1B|ZEB2|THRAP3|SNAPC5|DEAF1|KPNA6|TFB1M|SUPT20H|KDM3A|NFE4|POLR1B|GTF3C6|SCX	-2.5	MyList
GO Biological Processes	19	GO:0050865	regulation of cell activation	19_GO:0032501 multicellular organismal process	-4.1	2.4	4.5	30182	655	486	25	5.1	1	207|239|637|916|923|1050|2242|2812|3111|3113|3142|3572|3689|4846|4860|6469|9466|9473|27040|29851|30009|51206|56833|114897|115004	AKT1|ALOX12|BID|CD3E|CD6|CEBPA|FES|GP1BB|HLA-DOA|HLA-DPA1|HLX|IL6ST|ITGB2|NOS3|PNP|SHH|IL27RA|THEMIS2|LAT|ICOS|TBX21|GP6|SLAMF8|C1QTNF1|CGAS	-2.5	MyList
GO Biological Processes	19	GO:0001701	in utero embryonic development	19_GO:0032502 developmental process	-4.1	2.9	4.7	30182	392	486	18	3.7	0.86	207|598|1050|2116|2768|4242|4846|4851|6615|7075|10672|26173|29985|53615|64359|84700|343263|387733	AKT1|BCL2L1|CEBPA|ETV2|GNA12|MFNG|NOS3|NOTCH1|SNAI1|TIE1|GNA13|INTS1|SLC39A3|MBD3|NXN|MYO18B|MYBPHL|IFITM5	-2.5	MyList
GO Biological Processes	19	GO:0001649	osteoblast differentiation	19_GO:0032502 developmental process	-4.1	4.5	5.3	30182	137	486	10	2.1	0.64	207|249|632|2274|6469|6615|8482|8994|10189|22801	AKT1|ALPL|BGLAP|FHL2|SHH|SNAI1|SEMA7A|LIMD1|ALYREF|ITGA11	-2.5	MyList
Reactome Gene Sets	6	R-HSA-556833	Metabolism of lipids		-4.1	2.3	4.4	30182	743	486	27	5.6	1	239|622|2169|2224|2274|2581|2820|3638|3972|6613|8760|9256|9524|9536|9967|10449|11283|23097|27349|55301|79642|80230|91734|114876|114884|127281|253558	ALOX12|BDH1|FABP2|FDPS|FHL2|GALC|GPD2|INSIG1|LHB|SUMO2|CDS2|TSPOAP1|TECR|PTGES|THRAP3|ACAA2|CYP4F8|CDK19|MCAT|OLAH|ARSJ|RUFY1|IDI2|OSBPL1A|OSBPL10|PRXL2B|LCLAT1	-2.4	MyList
GO Biological Processes	19	GO:0001501	skeletal system development	19_GO:0032502 developmental process	-4.1	2.6	4.6	30182	507	486	21	4.3	0.92	249|632|1310|1750|2812|3213|3638|5636|6469|6615|7020|9770|10522|22856|29985|53834|56172|80169|81029|387733|642658	ALPL|BGLAP|COL19A1|DLX6|GP1BB|HOXB3|INSIG1|PRPSAP2|SHH|SNAI1|TFAP2A|RASSF2|DEAF1|CHSY1|SLC39A3|FGFRL1|ANKH|CTC1|WNT5B|IFITM5|SCX	-2.4	MyList
GO Biological Processes	19	GO:0033280	response to vitamin D	19_GO:0050896 response to stimulus	-4	11	6.7	30182	29	486	5	1	0.46	249|632|2242|8614|54332	ALPL|BGLAP|FES|STC2|GDAP1	-2.4	MyList
GO Biological Processes	19	GO:0001667	ameboidal-type cell migration	19_GO:0009987 cellular process	-4	3.8	5	30182	197	486	12	2.5	0.7	207|3964|4846|6469|6615|8482|9839|10500|23500|55698|56920|57175	AKT1|LGALS8|NOS3|SHH|SNAI1|SEMA7A|ZEB2|SEMA6C|DAAM2|RADIL|SEMA3G|CORO1B	-2.4	MyList
GO Biological Processes	19	GO:0060828	regulation of canonical Wnt signaling pathway	19_GO:0023052 signaling	-4	3.3	4.9	30182	260	486	14	2.9	0.76	3087|4851|6469|6794|8994|9839|10297|23500|55716|83595|83786|85409|130574|151195	HHEX|NOTCH1|SHH|STK11|LIMD1|ZEB2|APC2|DAAM2|LMBR1L|SOX7|FRMD8|NKD2|LYPD6|CCNYL1	-2.4	MyList
GO Biological Processes	19	GO:0003002	regionalization	19_GO:0032502 developmental process	-4	2.8	4.6	30182	401	486	18	3.7	0.86	3087|3213|4851|6469|6615|6909|7479|22856|23272|23500|25914|51098|51676|55079|56033|63950|79191|79192	HHEX|HOXB3|NOTCH1|SHH|SNAI1|TBX2|WNT8B|CHSY1|TASOR|DAAM2|RTTN|IFT52|ASB2|FEZF2|BARX1|DMRTA2|IRX3|IRX1	-2.4	MyList
GO Biological Processes	19	GO:0043368	positive T cell selection	19_GO:0002376 immune system process	-4	10	6.6	30182	30	486	5	1	0.46	916|4063|6469|6794|30009	CD3E|LY9|SHH|STK11|TBX21	-2.4	MyList
GO Biological Processes	19	GO:0060537	muscle tissue development	19_GO:0032502 developmental process	-3.9	3	4.7	30182	333	486	16	3.3	0.81	1310|2242|2274|3142|4851|6469|6546|6909|9242|10529|51676|63950|64220|79191|84700|642658	COL19A1|FES|FHL2|HLX|NOTCH1|SHH|SLC8A1|TBX2|MSC|NEBL|ASB2|DMRTA2|STRA6|IRX3|MYO18B|SCX	-2.3	MyList
GO Biological Processes	19	GO:0008203	cholesterol metabolic process	19_GO:0008152 metabolic process	-3.9	4.8	5.2	30182	117	486	9	1.9	0.61	1050|1071|2224|3638|8578|10449|27329|91734|114876	CEBPA|CETP|FDPS|INSIG1|SCARF1|ACAA2|ANGPTL3|IDI2|OSBPL1A	-2.3	MyList
GO Biological Processes	19	GO:0006351	DNA-templated transcription	19_GO:0008152 metabolic process	-3.9	2.4	4.4	30182	599	486	23	4.7	0.96	1050|2274|2354|3172|4851|5442|6923|7428|8204|8458|9014|9839|9967|10302|10522|23633|51106|55578|55818|58160|84172|112495|642658	CEBPA|FHL2|FOSB|HNF4A|NOTCH1|POLRMT|ELOB|VHL|NRIP1|TTF2|TAF1B|ZEB2|THRAP3|SNAPC5|DEAF1|KPNA6|TFB1M|SUPT20H|KDM3A|NFE4|POLR1B|GTF3C6|SCX	-2.3	MyList
GO Biological Processes	19	GO:0097659	nucleic acid-templated transcription	19_GO:0008152 metabolic process	-3.9	2.4	4.4	30182	601	486	23	4.7	0.96	1050|2274|2354|3172|4851|5442|6923|7428|8204|8458|9014|9839|9967|10302|10522|23633|51106|55578|55818|58160|84172|112495|642658	CEBPA|FHL2|FOSB|HNF4A|NOTCH1|POLRMT|ELOB|VHL|NRIP1|TTF2|TAF1B|ZEB2|THRAP3|SNAPC5|DEAF1|KPNA6|TFB1M|SUPT20H|KDM3A|NFE4|POLR1B|GTF3C6|SCX	-2.3	MyList
GO Biological Processes	19	GO:0007229	integrin-mediated signaling pathway	19_GO:0023052 signaling	-3.8	5.3	5.3	30182	94	486	8	1.6	0.58	1793|3689|3690|8482|9636|22801|27040|27329	DOCK1|ITGB2|ITGB3|SEMA7A|ISG15|ITGA11|LAT|ANGPTL3	-2.3	MyList
GO Biological Processes	19	GO:0060538	skeletal muscle organ development	19_GO:0032502 developmental process	-3.8	4.2	5	30182	147	486	10	2.1	0.64	1310|3142|4851|6469|9242|51676|53834|63950|64220|642658	COL19A1|HLX|NOTCH1|SHH|MSC|ASB2|FGFRL1|DMRTA2|STRA6|SCX	-2.3	MyList
GO Biological Processes	19	GO:0001944	vasculature development	19_GO:0032502 developmental process	-3.8	2.5	4.4	30182	526	486	21	4.3	0.92	207|290|2116|2324|3213|3690|3964|4846|4851|6469|6794|6909|7075|7453|10672|27329|51162|51378|64220|79924|84700	AKT1|ANPEP|ETV2|FLT4|HOXB3|ITGB3|LGALS8|NOS3|NOTCH1|SHH|STK11|TBX2|TIE1|WARS1|GNA13|ANGPTL3|EGFL7|ANGPT4|STRA6|ADM2|MYO18B	-2.2	MyList
GO Biological Processes	19	GO:0071396	cellular response to lipid	19_GO:0050896 response to stimulus	-3.8	2.5	4.4	30182	527	486	21	4.3	0.92	207|632|923|2242|3312|3394|3638|4792|4846|6340|6528|6755|7479|8204|9450|9516|23097|54332|55818|81029|84458	AKT1|BGLAP|CD6|FES|HSPA8|IRF8|INSIG1|NFKBIA|NOS3|SCNN1G|SLC5A5|SSTR5|WNT8B|NRIP1|LY86|LITAF|CDK19|GDAP1|KDM3A|WNT5B|LCOR	-2.2	MyList
GO Biological Processes	19	GO:1905114	cell surface receptor signaling pathway involved in cell-cell signaling	19_GO:0023052 signaling	-3.8	2.8	4.5	30182	377	486	17	3.5	0.83	207|1139|2116|2535|3087|6469|6512|7479|9863|10297|23500|55716|56033|64359|81029|85409|128272	AKT1|CHRNA7|ETV2|FZD2|HHEX|SHH|SLC1A7|WNT8B|MAGI2|APC2|DAAM2|LMBR1L|BARX1|NXN|WNT5B|NKD2|ARHGEF19	-2.2	MyList
GO Biological Processes	19	GO:0002009	morphogenesis of an epithelium	19_GO:0032502 developmental process	-3.8	2.6	4.4	30182	451	486	19	3.9	0.88	1861|2304|2535|4851|6469|6615|6909|7020|7075|10522|10672|23616|27443|51098|51676|79191|79192|151449|170690	TOR1A|FOXE1|FZD2|NOTCH1|SHH|SNAI1|TBX2|TFAP2A|TIE1|DEAF1|GNA13|SH3BP1|CECR2|IFT52|ASB2|IRX3|IRX1|GDF7|ADAMTS16	-2.2	MyList
GO Biological Processes	19	GO:0042692	muscle cell differentiation	19_GO:0032502 developmental process	-3.8	3.2	4.6	30182	273	486	14	2.9	0.76	207|577|1793|2274|4851|6469|6546|6909|8038|10529|51676|79191|81029|84700	AKT1|ADGRB3|DOCK1|FHL2|NOTCH1|SHH|SLC8A1|TBX2|ADAM12|NEBL|ASB2|IRX3|WNT5B|MYO18B	-2.2	MyList
GO Biological Processes	19	GO:0060485	mesenchyme development	19_GO:0032502 developmental process	-3.8	3.3	4.7	30182	241	486	13	2.7	0.73	4846|4851|6469|6615|6909|8482|10500|23272|55698|56920|80320|84172|642658	NOS3|NOTCH1|SHH|SNAI1|TBX2|SEMA7A|SEMA6C|TASOR|RADIL|SEMA3G|SP6|POLR1B|SCX	-2.2	MyList
GO Biological Processes	19	GO:0003170	heart valve development	19_GO:0032502 developmental process	-3.8	6	5.4	30182	73	486	7	1.4	0.54	4846|4851|6615|7075|53834|64220|642658	NOS3|NOTCH1|SNAI1|TIE1|FGFRL1|STRA6|SCX	-2.2	MyList
GO Biological Processes	19	GO:0010543	regulation of platelet activation	19_GO:0032501 multicellular organismal process	-3.7	7.2	5.7	30182	52	486	6	1.2	0.5	239|2812|3572|4846|51206|114897	ALOX12|GP1BB|IL6ST|NOS3|GP6|C1QTNF1	-2.2	MyList
GO Biological Processes	19	GO:0016055	Wnt signaling pathway	19_GO:0023052 signaling	-3.7	3.1	4.5	30182	282	486	14	2.9	0.76	2116|2535|3087|6469|7479|9863|10297|23500|55716|56033|64359|81029|85409|128272	ETV2|FZD2|HHEX|SHH|WNT8B|MAGI2|APC2|DAAM2|LMBR1L|BARX1|NXN|WNT5B|NKD2|ARHGEF19	-2.1	MyList
GO Biological Processes	19	GO:0198738	cell-cell signaling by wnt	19_GO:0023052 signaling	-3.7	3.1	4.5	30182	282	486	14	2.9	0.76	2116|2535|3087|6469|7479|9863|10297|23500|55716|56033|64359|81029|85409|128272	ETV2|FZD2|HHEX|SHH|WNT8B|MAGI2|APC2|DAAM2|LMBR1L|BARX1|NXN|WNT5B|NKD2|ARHGEF19	-2.1	MyList
GO Biological Processes	19	GO:0060539	diaphragm development	19_GO:0032502 developmental process	-3.7	23	8.1	30182	8	486	3	0.62	0.36	9242|53834|64220	MSC|FGFRL1|STRA6	-2.1	MyList
GO Biological Processes	19	GO:1902652	secondary alcohol metabolic process	19_GO:0008152 metabolic process	-3.7	4.4	4.9	30182	127	486	9	1.9	0.61	1050|1071|2224|3638|8578|10449|27329|91734|114876	CEBPA|CETP|FDPS|INSIG1|SCARF1|ACAA2|ANGPTL3|IDI2|OSBPL1A	-2.1	MyList
GO Biological Processes	19	GO:0045165	cell fate commitment	19_GO:0032502 developmental process	-3.6	3.2	4.5	30182	250	486	13	2.7	0.73	2116|4063|4851|6469|6909|7479|10297|30009|55079|56833|63950|81029|151449	ETV2|LY9|NOTCH1|SHH|TBX2|WNT8B|APC2|TBX21|FEZF2|SLAMF8|DMRTA2|WNT5B|GDF7	-2.1	MyList
GO Biological Processes	19	GO:0070167	regulation of biomineral tissue development	19_GO:0032502 developmental process	-3.6	4.9	5	30182	101	486	8	1.6	0.58	632|4846|4851|6546|7020|9636|56172|387733	BGLAP|NOS3|NOTCH1|SLC8A1|TFAP2A|ISG15|ANKH|IFITM5	-2.1	MyList
GO Biological Processes	19	GO:0008217	regulation of blood pressure	19_GO:0032501 multicellular organismal process	-3.6	3.7	4.7	30182	187	486	11	2.3	0.67	147|2768|4846|4881|6196|6340|7349|10672|10911|79924|170690	ADRA1B|GNA12|NOS3|NPR1|RPS6KA2|SCNN1G|UCN|GNA13|UTS2|ADM2|ADAMTS16	-2.1	MyList
KEGG Pathway	24	hsa04390	Hippo signaling pathway		-3.6	4	4.7	30182	157	486	10	2.1	0.64	999|2535|3689|7479|8994|10297|29119|81029|85409|151449	CDH1|FZD2|ITGB2|WNT8B|LIMD1|APC2|CTNNA3|WNT5B|NKD2|GDF7	-2.1	MyList
GO Biological Processes	19	GO:0007498	mesoderm development	19_GO:0032502 developmental process	-3.6	4.3	4.9	30182	129	486	9	1.9	0.61	2116|3690|5017|6469|6615|7075|10320|79191|642658	ETV2|ITGB3|OVOL1|SHH|SNAI1|TIE1|IKZF1|IRX3|SCX	-2.1	MyList
GO Biological Processes	19	GO:0008202	steroid metabolic process	19_GO:0008152 metabolic process	-3.5	3.2	4.4	30182	256	486	13	2.7	0.73	622|1050|1071|1592|2224|3638|3972|6469|8578|10449|27329|91734|114876	BDH1|CEBPA|CETP|CYP26A1|FDPS|INSIG1|LHB|SHH|SCARF1|ACAA2|ANGPTL3|IDI2|OSBPL1A	-2	MyList
GO Biological Processes	19	GO:0001525	angiogenesis	19_GO:0032502 developmental process	-3.5	2.9	4.3	30182	326	486	15	3.1	0.78	207|290|2324|3213|3690|4846|4851|6469|7075|7453|10672|27329|51162|51378|79924	AKT1|ANPEP|FLT4|HOXB3|ITGB3|NOS3|NOTCH1|SHH|TIE1|WARS1|GNA13|ANGPTL3|EGFL7|ANGPT4|ADM2	-2	MyList
GO Biological Processes	19	GO:0014706	striated muscle tissue development	19_GO:0032502 developmental process	-3.5	3.6	4.5	30182	192	486	11	2.3	0.67	2242|2274|4851|6469|6546|6909|9242|10529|51676|79191|84700	FES|FHL2|NOTCH1|SHH|SLC8A1|TBX2|MSC|NEBL|ASB2|IRX3|MYO18B	-2	MyList
Reactome Gene Sets	6	R-HSA-72766	Translation		-3.5	3	4.3	30182	292	486	14	2.9	0.76	1938|1974|4528|6224|6235|7453|8893|23107|23521|51373|51386|56945|60488|64960	EEF2|EIF4A2|MTIF2|RPS20|RPS29|WARS1|EIF2B5|MRPS27|RPL13A|MRPS17|EIF3L|MRPS22|MRPS35|MRPS15	-2	MyList
GO Biological Processes	19	GO:0048562	embryonic organ morphogenesis	19_GO:0032502 developmental process	-3.5	3	4.3	30182	292	486	14	2.9	0.76	1750|2304|2535|3142|3213|3638|4851|6469|6909|7020|29985|51098|51676|64220	DLX6|FOXE1|FZD2|HLX|HOXB3|INSIG1|NOTCH1|SHH|TBX2|TFAP2A|SLC39A3|IFT52|ASB2|STRA6	-2	MyList
GO Biological Processes	19	GO:0033273	response to vitamin	19_GO:0050896 response to stimulus	-3.5	5.4	5.1	30182	80	486	7	1.4	0.54	249|632|1592|2242|4255|8614|54332	ALPL|BGLAP|CYP26A1|FES|MGMT|STC2|GDAP1	-2	MyList
GO Biological Processes	19	GO:0032526	response to retinoic acid	19_GO:0050896 response to stimulus	-3.5	4.6	4.8	30182	107	486	8	1.6	0.58	1592|6909|7075|7479|54332|64220|81029|205860	CYP26A1|TBX2|TIE1|WNT8B|GDAP1|STRA6|WNT5B|TRIML2	-2	MyList
GO Biological Processes	19	GO:0044283	small molecule biosynthetic process	19_GO:0008152 metabolic process	-3.5	2.5	4.1	30182	443	486	18	3.7	0.86	239|2224|3638|3972|4860|9524|9536|10449|10955|23743|27165|27349|55258|55301|55818|91734|114876|127281	ALOX12|FDPS|INSIG1|LHB|PNP|TECR|PTGES|ACAA2|SERINC3|BHMT2|GLS2|MCAT|THNSL2|OLAH|KDM3A|IDI2|OSBPL1A|PRXL2B	-2	MyList
GO Biological Processes	19	GO:0033365	protein localization to organelle	19_GO:0051179 localization	-3.5	2.1	4	30182	726	486	25	5.1	1	207|637|1861|2516|3087|3098|3312|3638|4792|4851|5903|6469|6794|7251|7507|9636|9903|23272|23353|23511|23534|23633|23645|54332|134266	AKT1|BID|TOR1A|NR5A1|HHEX|HK1|HSPA8|INSIG1|NFKBIA|NOTCH1|RANBP2|SHH|STK11|TSG101|XPA|ISG15|KLHL21|TASOR|SUN1|NUP188|TNPO3|KPNA6|PPP1R15A|GDAP1|GRPEL2	-2	MyList
GO Biological Processes	19	GO:0080135	regulation of cellular response to stress	19_GO:0050896 response to stimulus	-3.5	2.1	4	30182	726	486	25	5.1	1	207|598|637|2324|3638|3954|4255|5429|5582|6317|6615|7185|7428|7430|8578|9675|9770|9958|10955|23450|23645|55578|115004|138065|282679	AKT1|BCL2L1|BID|FLT4|INSIG1|LETM1|MGMT|POLH|PRKCG|SERPINB3|SNAI1|TRAF1|VHL|EZR|SCARF1|TTI1|RASSF2|USP15|SERINC3|SF3B3|PPP1R15A|SUPT20H|CGAS|RNF183|AQP11	-2	MyList
GO Biological Processes	19	GO:0007507	heart development	19_GO:0032502 developmental process	-3.4	2.3	4	30182	562	486	21	4.3	0.92	2242|2274|2535|4846|4851|6196|6469|6546|6615|6909|7075|9242|10529|51098|51676|53615|53834|64220|79191|84700|642658	FES|FHL2|FZD2|NOS3|NOTCH1|RPS6KA2|SHH|SLC8A1|SNAI1|TBX2|TIE1|MSC|NEBL|IFT52|ASB2|MBD3|FGFRL1|STRA6|IRX3|MYO18B|SCX	-2	MyList
GO Biological Processes	19	GO:0048568	embryonic organ development	19_GO:0032502 developmental process	-3.4	2.5	4.1	30182	450	486	18	3.7	0.86	207|1050|1750|2304|2535|3142|3213|3638|4851|6469|6615|6909|7020|29985|51098|51676|53615|64220	AKT1|CEBPA|DLX6|FOXE1|FZD2|HLX|HOXB3|INSIG1|NOTCH1|SHH|SNAI1|TBX2|TFAP2A|SLC39A3|IFT52|ASB2|MBD3|STRA6	-1.9	MyList
GO Biological Processes	19	GO:0007568	aging	19_GO:0032502 developmental process	-3.4	3.7	4.5	30182	169	486	10	2.1	0.64	249|632|2516|2768|5309|8893|10672|23268|53615|80169	ALPL|BGLAP|NR5A1|GNA12|PITX3|EIF2B5|GNA13|DNMBP|MBD3|CTC1	-1.9	MyList
GO Biological Processes	19	GO:0010762	regulation of fibroblast migration	19_GO:0040011 locomotion	-3.4	7.8	5.5	30182	40	486	5	1	0.46	207|2768|3690|6546|10672	AKT1|GNA12|ITGB3|SLC8A1|GNA13	-1.9	MyList
GO Biological Processes	19	GO:0008637	apoptotic mitochondrial changes	19_GO:0009987 cellular process	-3.4	6.1	5.1	30182	61	486	6	1.2	0.5	207|291|598|637|10449|55288	AKT1|SLC25A4|BCL2L1|BID|ACAA2|RHOT1	-1.9	MyList
GO Biological Processes	19	GO:0060768	regulation of epithelial cell proliferation involved in prostate gland development	19_GO:0022414 reproductive process	-3.3	19	7.1	30182	10	486	3	0.62	0.36	4851|6469|6794	NOTCH1|SHH|STK11	-1.9	MyList
GO Biological Processes	19	GO:0030855	epithelial cell differentiation	19_GO:0032502 developmental process	-3.3	2.2	3.9	30182	615	486	22	4.5	0.94	207|1050|1750|2516|2535|3572|4255|4851|5017|5309|7075|7251|7430|9863|23616|27134|56033|81029|151449|390792|448835|642658	AKT1|CEBPA|DLX6|NR5A1|FZD2|IL6ST|MGMT|NOTCH1|OVOL1|PITX3|TIE1|TSG101|EZR|MAGI2|SH3BP1|TJP3|BARX1|WNT5B|GDF7|KRT39|LCE6A|SCX	-1.9	MyList
GO Biological Processes	19	GO:0048762	mesenchymal cell differentiation	19_GO:0032502 developmental process	-3.3	3.6	4.4	30182	171	486	10	2.1	0.64	4851|6469|6615|8482|10500|23272|55698|56920|80320|84172	NOTCH1|SHH|SNAI1|SEMA7A|SEMA6C|TASOR|RADIL|SEMA3G|SP6|POLR1B	-1.9	MyList
GO Biological Processes	19	GO:0072595	maintenance of protein localization in organelle	19_GO:0051179 localization	-3.3	7.6	5.4	30182	41	486	5	1	0.46	207|2516|3098|3638|23353	AKT1|NR5A1|HK1|INSIG1|SUN1	-1.9	MyList
GO Biological Processes	19	GO:0007219	Notch signaling pathway	19_GO:0023052 signaling	-3.3	4.4	4.6	30182	113	486	8	1.6	0.58	1050|2116|3741|4792|4851|6615|6909|51378	CEBPA|ETV2|KCNA5|NFKBIA|NOTCH1|SNAI1|TBX2|ANGPT4	-1.9	MyList
GO Biological Processes	19	GO:0001708	cell fate specification	19_GO:0032502 developmental process	-3.3	5	4.8	30182	87	486	7	1.4	0.54	2116|4851|6469|6909|10297|30009|63950	ETV2|NOTCH1|SHH|TBX2|APC2|TBX21|DMRTA2	-1.9	MyList
GO Biological Processes	19	GO:0032787	monocarboxylic acid metabolic process	19_GO:0008152 metabolic process	-3.3	2.4	3.9	30182	498	486	19	3.9	0.88	239|1553|1592|2169|3098|8824|9524|9536|10449|11283|27329|27349|54579|55258|55301|81889|114876|127281|254552	ALOX12|CYP2A13|CYP26A1|FABP2|HK1|CES2|TECR|PTGES|ACAA2|CYP4F8|ANGPTL3|MCAT|UGT1A5|THNSL2|OLAH|FAHD1|OSBPL1A|PRXL2B|NUDT8	-1.8	MyList
GO Biological Processes	19	GO:0006606	protein import into nucleus	19_GO:0051179 localization	-3.3	4.4	4.6	30182	114	486	8	1.6	0.58	207|4792|4851|5903|6469|23511|23534|23633	AKT1|NFKBIA|NOTCH1|RANBP2|SHH|NUP188|TNPO3|KPNA6	-1.8	MyList
GO Biological Processes	19	GO:0050878	regulation of body fluid levels	19_GO:0065007 biological regulation	-3.3	2.7	4.1	30182	345	486	15	3.1	0.78	239|2768|2812|3172|3690|4846|4881|5627|6340|6469|7349|10627|10672|51206|114897	ALOX12|GNA12|GP1BB|HNF4A|ITGB3|NOS3|NPR1|PROS1|SCNN1G|SHH|UCN|MYL12A|GNA13|GP6|C1QTNF1	-1.8	MyList
GO Biological Processes	19	GO:0030178	negative regulation of Wnt signaling pathway	19_GO:0023052 signaling	-3.3	3.6	4.3	30182	174	486	10	2.1	0.64	4851|6469|6794|8994|10297|55716|56033|64359|83786|85409	NOTCH1|SHH|STK11|LIMD1|APC2|LMBR1L|BARX1|NXN|FRMD8|NKD2	-1.8	MyList
GO Biological Processes	19	GO:0031663	lipopolysaccharide-mediated signaling pathway	19_GO:0044419 biological process involved in interspecies interaction between organisms	-3.3	7.4	5.3	30182	42	486	5	1	0.46	207|923|4792|4846|9450	AKT1|CD6|NFKBIA|NOS3|LY86	-1.8	MyList
GO Biological Processes	19	GO:0051960	regulation of nervous system development	19_GO:0032502 developmental process	-3.3	2.4	3.9	30182	461	486	18	3.7	0.86	207|577|999|3213|3556|3572|4851|5309|6469|6794|8482|9378|10500|23500|55079|56920|63950|441381	AKT1|ADGRB3|CDH1|HOXB3|IL1RAP|IL6ST|NOTCH1|PITX3|SHH|STK11|SEMA7A|NRXN1|SEMA6C|DAAM2|FEZF2|SEMA3G|DMRTA2|LRRC24	-1.8	MyList
Canonical Pathways	11	M5885	NABA MATRISOME ASSOCIATED		-3.2	2.1	3.8	30182	751	486	25	5.1	1	1476|1992|3698|3960|3964|6317|6362|6469|6677|7479|8038|8482|10500|11085|27006|27329|51162|51378|51379|56920|81029|114897|151449|170690|727897	CSTB|SERPINB1|ITIH2|LGALS4|LGALS8|SERPINB3|CCL18|SHH|SPAM1|WNT8B|ADAM12|SEMA7A|SEMA6C|ADAM30|FGF22|ANGPTL3|EGFL7|ANGPT4|CRLF3|SEMA3G|WNT5B|C1QTNF1|GDF7|ADAMTS16|MUC5B	-1.8	MyList
GO Biological Processes	19	GO:0060562	epithelial tube morphogenesis	19_GO:0032502 developmental process	-3.2	2.8	4	30182	313	486	14	2.9	0.76	2535|4851|6469|6909|7075|10522|10672|27443|51098|51676|79191|79192|151449|170690	FZD2|NOTCH1|SHH|TBX2|TIE1|DEAF1|GNA13|CECR2|IFT52|ASB2|IRX3|IRX1|GDF7|ADAMTS16	-1.8	MyList
GO Biological Processes	19	GO:0045058	T cell selection	19_GO:0002376 immune system process	-3.2	7.2	5.2	30182	43	486	5	1	0.46	916|4063|6469|6794|30009	CD3E|LY9|SHH|STK11|TBX21	-1.8	MyList
GO Biological Processes	19	GO:0051146	striated muscle cell differentiation	19_GO:0032502 developmental process	-3.2	3.3	4.2	30182	209	486	11	2.3	0.67	207|577|1793|2274|6469|6546|8038|10529|51676|79191|84700	AKT1|ADGRB3|DOCK1|FHL2|SHH|SLC8A1|ADAM12|NEBL|ASB2|IRX3|MYO18B	-1.8	MyList
GO Biological Processes	19	GO:0045059	positive thymic T cell selection	19_GO:0002376 immune system process	-3.2	17	6.8	30182	11	486	3	0.62	0.36	916|6469|6794	CD3E|SHH|STK11	-1.8	MyList
GO Biological Processes	19	GO:0001568	blood vessel development	19_GO:0032502 developmental process	-3.2	2.3	3.9	30182	506	486	19	3.9	0.88	207|290|2116|2324|3213|3690|4846|4851|6469|6909|7075|7453|10672|27329|51162|51378|64220|79924|84700	AKT1|ANPEP|ETV2|FLT4|HOXB3|ITGB3|NOS3|NOTCH1|SHH|TBX2|TIE1|WARS1|GNA13|ANGPTL3|EGFL7|ANGPT4|STRA6|ADM2|MYO18B	-1.8	MyList
GO Biological Processes	19	GO:0010226	response to lithium ion	19_GO:0050896 response to stimulus	-3.2	9.9	5.7	30182	25	486	4	0.82	0.41	999|1050|6469|8893	CDH1|CEBPA|SHH|EIF2B5	-1.8	MyList
GO Biological Processes	19	GO:0006397	mRNA processing	19_GO:0008152 metabolic process	-3.2	2.4	3.9	30182	467	486	18	3.7	0.86	3312|8458|9967|10189|10465|11017|11129|11193|23398|23450|54845|55234|55339|55544|56903|58155|64062|64506	HSPA8|TTF2|THRAP3|ALYREF|PPIH|SNRNP27|CLASRP|WBP4|PPWD1|SF3B3|ESRP1|SMU1|WDR33|RBM38|PAPOLB|PTBP2|RBM26|CPEB1	-1.8	MyList
GO Biological Processes	19	GO:0051348	negative regulation of transferase activity	19_GO:0065007 biological regulation	-3.2	2.9	4.1	30182	279	486	13	2.7	0.73	207|1050|1974|3087|4085|6224|6317|6546|7251|7453|9052|9711|140775	AKT1|CEBPA|EIF4A2|HHEX|MAD2L1|RPS20|SERPINB3|SLC8A1|TSG101|WARS1|GPRC5A|RUBCN|SMCR8	-1.8	MyList
GO Biological Processes	19	GO:0030098	lymphocyte differentiation	19_GO:0002376 immune system process	-3.2	2.9	4.1	30182	280	486	13	2.7	0.73	916|3087|3142|3394|4063|4242|6469|6794|10014|10320|30009|55716|56833	CD3E|HHEX|HLX|IRF8|LY9|MFNG|SHH|STK11|HDAC5|IKZF1|TBX21|LMBR1L|SLAMF8	-1.8	MyList
GO Biological Processes	19	GO:0035148	tube formation	19_GO:0032502 developmental process	-3.2	3.8	4.3	30182	148	486	9	1.9	0.61	2535|4851|6469|10522|27443|51098|79191|79192|151449	FZD2|NOTCH1|SHH|DEAF1|CECR2|IFT52|IRX3|IRX1|GDF7	-1.8	MyList
GO Biological Processes	19	GO:0030278	regulation of ossification	19_GO:0032501 multicellular organismal process	-3.2	4.2	4.4	30182	119	486	8	1.6	0.58	632|4851|6546|7020|9636|22856|56172|387733	BGLAP|NOTCH1|SLC8A1|TFAP2A|ISG15|CHSY1|ANKH|IFITM5	-1.8	MyList
GO Biological Processes	19	GO:0051170	import into nucleus	19_GO:0051179 localization	-3.2	4.2	4.4	30182	119	486	8	1.6	0.58	207|4792|4851|5903|6469|23511|23534|23633	AKT1|NFKBIA|NOTCH1|RANBP2|SHH|NUP188|TNPO3|KPNA6	-1.8	MyList
KEGG Pathway	24	hsa05226	Gastric cancer		-3.1	3.8	4.3	30182	149	486	9	1.9	0.61	207|999|2535|6469|7479|10297|27006|29119|81029	AKT1|CDH1|FZD2|SHH|WNT8B|APC2|FGF22|CTNNA3|WNT5B	-1.7	MyList
KEGG Pathway	24	hsa04658	Th1 and Th2 cell differentiation		-3.1	4.7	4.6	30182	92	486	7	1.4	0.54	916|3111|3113|4792|4851|27040|30009	CD3E|HLA-DOA|HLA-DPA1|NFKBIA|NOTCH1|LAT|TBX21	-1.7	MyList
GO Biological Processes	19	GO:0006631	fatty acid metabolic process	19_GO:0008152 metabolic process	-3.1	2.7	4	30182	319	486	14	2.9	0.76	239|1553|2169|8824|9524|9536|10449|11283|27329|27349|55258|55301|127281|254552	ALOX12|CYP2A13|FABP2|CES2|TECR|PTGES|ACAA2|CYP4F8|ANGPTL3|MCAT|THNSL2|OLAH|PRXL2B|NUDT8	-1.7	MyList
GO Biological Processes	19	GO:0035051	cardiocyte differentiation	19_GO:0032502 developmental process	-3.1	4.1	4.4	30182	120	486	8	1.6	0.58	2274|4851|6546|6909|10529|51676|79191|84700	FHL2|NOTCH1|SLC8A1|TBX2|NEBL|ASB2|IRX3|MYO18B	-1.7	MyList
GO Biological Processes	19	GO:0010259	multicellular organism aging	19_GO:0032502 developmental process	-3.1	9.6	5.6	30182	26	486	4	0.82	0.41	249|2516|2768|10672	ALPL|NR5A1|GNA12|GNA13	-1.7	MyList
Canonical Pathways	11	M106	PID HNF3B PATHWAY		-3.1	6.9	5.1	30182	45	486	5	1	0.46	207|622|1050|3172|7276	AKT1|BDH1|CEBPA|HNF4A|TTR	-1.7	MyList
GO Biological Processes	19	GO:0048736	appendage development	19_GO:0032502 developmental process	-3.1	3.4	4.2	30182	182	486	10	2.1	0.64	1750|2768|4851|6469|6909|7020|23288|29985|51098|642658	DLX6|GNA12|NOTCH1|SHH|TBX2|TFAP2A|IQCE|SLC39A3|IFT52|SCX	-1.7	MyList
GO Biological Processes	19	GO:0060173	limb development	19_GO:0032502 developmental process	-3.1	3.4	4.2	30182	182	486	10	2.1	0.64	1750|2768|4851|6469|6909|7020|23288|29985|51098|642658	DLX6|GNA12|NOTCH1|SHH|TBX2|TFAP2A|IQCE|SLC39A3|IFT52|SCX	-1.7	MyList
GO Biological Processes	19	GO:0009612	response to mechanical stimulus	19_GO:0050896 response to stimulus	-3.1	3.2	4.1	30182	215	486	11	2.3	0.67	632|2354|3690|3741|4792|6546|7100|7349|9378|64220|642658	BGLAP|FOSB|ITGB3|KCNA5|NFKBIA|SLC8A1|TLR5|UCN|NRXN1|STRA6|SCX	-1.7	MyList
GO Biological Processes	19	GO:0048863	stem cell differentiation	19_GO:0032502 developmental process	-3.1	3.4	4.1	30182	184	486	10	2.1	0.64	632|4851|6469|6909|8482|10500|55698|55716|56920|63950	BGLAP|NOTCH1|SHH|TBX2|SEMA7A|SEMA6C|RADIL|LMBR1L|SEMA3G|DMRTA2	-1.7	MyList
GO Biological Processes	19	GO:0043583	ear development	19_GO:0032502 developmental process	-3.1	3.1	4	30182	218	486	11	2.3	0.67	1050|1750|2535|3638|4851|6469|6909|7020|11020|27443|64220	CEBPA|DLX6|FZD2|INSIG1|NOTCH1|SHH|TBX2|TFAP2A|IFT27|CECR2|STRA6	-1.7	MyList
GO Biological Processes	19	GO:0031175	neuron projection development	19_GO:0032502 developmental process	-3	2.1	3.7	30182	647	486	22	4.5	0.94	916|999|1139|1861|4851|6469|6794|7349|8482|8578|9378|10500|11020|27443|28988|51299|55079|56920|79778|123904|151449|266977	CD3E|CDH1|CHRNA7|TOR1A|NOTCH1|SHH|STK11|UCN|SEMA7A|SCARF1|NRXN1|SEMA6C|IFT27|CECR2|DBNL|NRN1|FEZF2|SEMA3G|MICALL2|NRN1L|GDF7|ADGRF1	-1.7	MyList
GO Biological Processes	19	GO:0048738	cardiac muscle tissue development	19_GO:0032502 developmental process	-3	3.3	4.1	30182	186	486	10	2.1	0.64	2242|2274|4851|6546|6909|9242|10529|51676|79191|84700	FES|FHL2|NOTCH1|SLC8A1|TBX2|MSC|NEBL|ASB2|IRX3|MYO18B	-1.7	MyList
GO Biological Processes	19	GO:0050922	negative regulation of chemotaxis	19_GO:0040011 locomotion	-3	5.3	4.6	30182	70	486	6	1.2	0.5	4851|8482|10500|56833|56920|57175	NOTCH1|SEMA7A|SEMA6C|SLAMF8|SEMA3G|CORO1B	-1.7	MyList
GO Biological Processes	19	GO:1905314	semi-lunar valve development	19_GO:0032502 developmental process	-3	6.6	4.9	30182	47	486	5	1	0.46	4846|4851|6615|7075|64220	NOS3|NOTCH1|SNAI1|TIE1|STRA6	-1.7	MyList
GO Biological Processes	19	GO:0043043	peptide biosynthetic process	19_GO:0008152 metabolic process	-3	2.5	3.8	30182	403	486	16	3.3	0.81	1938|1974|3960|4528|6224|6235|7453|8893|23107|23521|51373|51386|56945|60488|64506|64960	EEF2|EIF4A2|LGALS4|MTIF2|RPS20|RPS29|WARS1|EIF2B5|MRPS27|RPL13A|MRPS17|EIF3L|MRPS22|MRPS35|CPEB1|MRPS15	-1.7	MyList
GO Biological Processes	19	GO:0048608	reproductive structure development	19_GO:0022414 reproductive process	-3	2.8	3.9	30182	291	486	13	2.7	0.73	598|2516|3972|4846|4851|6469|6794|8204|8893|11085|64220|151449|642658	BCL2L1|NR5A1|LHB|NOS3|NOTCH1|SHH|STK11|NRIP1|EIF2B5|ADAM30|STRA6|GDF7|SCX	-1.6	MyList
GO Biological Processes	19	GO:0008593	regulation of Notch signaling pathway	19_GO:0023052 signaling	-3	4.5	4.4	30182	97	486	7	1.4	0.54	207|3572|4242|4792|4846|4851|51162	AKT1|IL6ST|MFNG|NFKBIA|NOS3|NOTCH1|EGFL7	-1.6	MyList
Reactome Gene Sets	6	R-HSA-2990846	SUMOylation		-3	3.3	4.1	30182	188	486	10	2.1	0.64	1912|2516|4792|5903|6613|7020|7428|8204|23511|25950	PHC2|NR5A1|NFKBIA|RANBP2|SUMO2|TFAP2A|VHL|NRIP1|NUP188|RWDD3	-1.6	MyList
GO Biological Processes	19	GO:0055006	cardiac cell development	19_GO:0032502 developmental process	-3	5.2	4.6	30182	71	486	6	1.2	0.5	2274|4851|6546|10529|51676|84700	FHL2|NOTCH1|SLC8A1|NEBL|ASB2|MYO18B	-1.6	MyList
GO Biological Processes	19	GO:0051701	biological process involved in interaction with host	19_GO:0044419 biological process involved in interspecies interaction between organisms	-3	3.6	4.1	30182	156	486	9	1.9	0.61	290|598|3690|6317|7251|10189|55207|90861|131578	ANPEP|BCL2L1|ITGB3|SERPINB3|TSG101|ALYREF|ARL8B|JPT2|LRRC15	-1.6	MyList
KEGG Pathway	24	hsa05166	Human T-cell leukemia virus 1 infection		-3	3.1	4	30182	222	486	11	2.3	0.67	207|291|598|916|2224|3111|3113|3689|4085|4792|7850	AKT1|SLC25A4|BCL2L1|CD3E|FDPS|HLA-DOA|HLA-DPA1|ITGB2|MAD2L1|NFKBIA|IL1R2	-1.6	MyList
GO Biological Processes	19	GO:0010745	negative regulation of macrophage derived foam cell differentiation	19_GO:0032502 developmental process	-3	14	6.2	30182	13	486	3	0.62	0.36	1071|3690|4792	CETP|ITGB3|NFKBIA	-1.6	MyList
GO Biological Processes	19	GO:0042060	wound healing	19_GO:0050896 response to stimulus	-3	2.6	3.8	30182	331	486	14	2.9	0.76	1861|2768|2812|3172|3690|5627|6469|10627|10672|51206|55207|57175|81029|128272	TOR1A|GNA12|GP1BB|HNF4A|ITGB3|PROS1|SHH|MYL12A|GNA13|GP6|ARL8B|CORO1B|WNT5B|ARHGEF19	-1.6	MyList
GO Biological Processes	19	GO:0048839	inner ear development	19_GO:0032502 developmental process	-3	3.3	4	30182	190	486	10	2.1	0.64	1050|1750|2535|3638|4851|6469|6909|7020|11020|27443	CEBPA|DLX6|FZD2|INSIG1|NOTCH1|SHH|TBX2|TFAP2A|IFT27|CECR2	-1.6	MyList
GO Biological Processes	19	GO:0001822	kidney development	19_GO:0032502 developmental process	-3	2.7	3.8	30182	295	486	13	2.7	0.73	1592|4851|5017|6469|7020|9863|11020|50484|64220|79191|79192|170690|282679	CYP26A1|NOTCH1|OVOL1|SHH|TFAP2A|MAGI2|IFT27|RRM2B|STRA6|IRX3|IRX1|ADAMTS16|AQP11	-1.6	MyList
GO Biological Processes	19	GO:0061458	reproductive system development	19_GO:0032502 developmental process	-3	2.7	3.8	30182	295	486	13	2.7	0.73	598|2516|3972|4846|4851|6469|6794|8204|8893|11085|64220|151449|642658	BCL2L1|NR5A1|LHB|NOS3|NOTCH1|SHH|STK11|NRIP1|EIF2B5|ADAM30|STRA6|GDF7|SCX	-1.6	MyList
GO Biological Processes	19	GO:0006909	phagocytosis	19_GO:0051179 localization	-3	3.5	4.1	30182	158	486	9	1.9	0.61	1793|3394|3689|3690|9711|22918|23616|55207|63916	DOCK1|IRF8|ITGB2|ITGB3|RUBCN|CD93|SH3BP1|ARL8B|ELMO2	-1.6	MyList
GO Biological Processes	19	GO:0055065	metal ion homeostasis	19_GO:0042592 homeostatic process	-3	2.4	3.7	30182	410	486	16	3.3	0.81	249|496|1139|3741|3954|6340|6546|7782|8614|9256|27032|54499|56172|113235|151176|201140	ALPL|ATP4B|CHRNA7|KCNA5|LETM1|SCNN1G|SLC8A1|SLC30A4|STC2|TSPOAP1|ATP2C1|TMCO1|ANKH|SLC46A1|ERFE|DHRS7C	-1.6	MyList
KEGG Pathway	24	hsa04640	Hematopoietic cell lineage		-3	4.4	4.3	30182	99	486	7	1.4	0.54	290|916|2812|3111|3113|3690|7850	ANPEP|CD3E|GP1BB|HLA-DOA|HLA-DPA1|ITGB3|IL1R2	-1.6	MyList
CORUM	33	CORUM:315	28S ribosomal subunit, mitochondrial		-2.9	8.6	5.2	30182	29	486	4	0.82	0.41	23107|51373|56945|64960	MRPS27|MRPS17|MRPS22|MRPS15	-1.6	MyList
Canonical Pathways	11	M55	PID S1P S1P3 PATHWAY		-2.9	8.6	5.2	30182	29	486	4	0.82	0.41	207|2768|3690|10672	AKT1|GNA12|ITGB3|GNA13	-1.6	MyList
GO Biological Processes	19	GO:0010631	epithelial cell migration	19_GO:0032501 multicellular organismal process	-2.9	4.3	4.3	30182	100	486	7	1.4	0.54	207|3964|4846|6615|9839|23500|57175	AKT1|LGALS8|NOS3|SNAI1|ZEB2|DAAM2|CORO1B	-1.6	MyList
GO Biological Processes	19	GO:0001775	cell activation	19_GO:0032501 multicellular organismal process	-2.9	2	3.5	30182	705	486	23	4.7	0.96	916|923|2812|3087|3142|3394|3689|3690|4063|4242|6469|6794|7374|10014|10320|10627|10672|22918|27040|30009|51206|55716|56833	CD3E|CD6|GP1BB|HHEX|HLX|IRF8|ITGB2|ITGB3|LY9|MFNG|SHH|STK11|UNG|HDAC5|IKZF1|MYL12A|GNA13|CD93|LAT|TBX21|GP6|LMBR1L|SLAMF8	-1.6	MyList
GO Biological Processes	19	GO:0006412	translation	19_GO:0008152 metabolic process	-2.9	2.5	3.7	30182	375	486	15	3.1	0.78	1938|1974|4528|6224|6235|7453|8893|23107|23521|51373|51386|56945|60488|64506|64960	EEF2|EIF4A2|MTIF2|RPS20|RPS29|WARS1|EIF2B5|MRPS27|RPL13A|MRPS17|EIF3L|MRPS22|MRPS35|CPEB1|MRPS15	-1.6	MyList
GO Biological Processes	19	GO:0006518	peptide metabolic process	19_GO:0008152 metabolic process	-2.9	2.2	3.6	30182	536	486	19	3.9	0.88	290|1938|1974|3960|4528|6224|6235|7453|8893|23107|23457|23521|51373|51386|56945|60488|64506|64960|619373	ANPEP|EEF2|EIF4A2|LGALS4|MTIF2|RPS20|RPS29|WARS1|EIF2B5|MRPS27|ABCB9|RPL13A|MRPS17|EIF3L|MRPS22|MRPS35|CPEB1|MRPS15|MBOAT4	-1.6	MyList
GO Biological Processes	19	GO:0055080	monoatomic cation homeostasis	19_GO:0042592 homeostatic process	-2.9	2.3	3.6	30182	495	486	18	3.7	0.86	249|496|1139|3741|3954|6340|6546|7782|8614|9256|27032|54499|56172|56833|113235|151176|201140|282679	ALPL|ATP4B|CHRNA7|KCNA5|LETM1|SCNN1G|SLC8A1|SLC30A4|STC2|TSPOAP1|ATP2C1|TMCO1|ANKH|SLAMF8|SLC46A1|ERFE|DHRS7C|AQP11	-1.6	MyList
KEGG Pathway	24	hsa04810	Regulation of actin cytoskeleton		-2.9	3	3.9	30182	229	486	11	2.3	0.67	207|1793|2768|3689|3690|7430|10297|10627|10672|22801|27006	AKT1|DOCK1|GNA12|ITGB2|ITGB3|EZR|APC2|MYL12A|GNA13|ITGA11|FGF22	-1.5	MyList
GO Biological Processes	19	GO:0090330	regulation of platelet aggregation	19_GO:0032501 multicellular organismal process	-2.9	8.3	5.1	30182	30	486	4	0.82	0.41	239|3572|51206|114897	ALOX12|IL6ST|GP6|C1QTNF1	-1.5	MyList
GO Biological Processes	19	GO:0060560	developmental growth involved in morphogenesis	19_GO:0040007 growth	-2.9	3.8	4.1	30182	131	486	8	1.6	0.58	4851|6469|6794|6909|8482|9863|51299|123904	NOTCH1|SHH|STK11|TBX2|SEMA7A|MAGI2|NRN1|NRN1L	-1.5	MyList
GO Biological Processes	19	GO:0098655	monoatomic cation transmembrane transport	19_GO:0051179 localization	-2.9	2.1	3.5	30182	623	486	21	4.3	0.92	291|496|1139|2812|3741|3743|3954|6340|6512|6528|6546|6564|7782|22821|27032|29985|54499|55515|56479|89822|113235	SLC25A4|ATP4B|CHRNA7|GP1BB|KCNA5|KCNA7|LETM1|SCNN1G|SLC1A7|SLC5A5|SLC8A1|SLC15A1|SLC30A4|RASA3|ATP2C1|SLC39A3|TMCO1|ASIC4|KCNQ5|KCNK17|SLC46A1	-1.5	MyList
GO Biological Processes	19	GO:0048711	positive regulation of astrocyte differentiation	19_GO:0032502 developmental process	-2.9	13	5.9	30182	14	486	3	0.62	0.36	3572|4851|6469	IL6ST|NOTCH1|SHH	-1.5	MyList
GO Biological Processes	19	GO:0002829	negative regulation of type 2 immune response	19_GO:0002376 immune system process	-2.9	13	5.9	30182	14	486	3	0.62	0.36	3142|9466|30009	HLX|IL27RA|TBX21	-1.5	MyList
GO Biological Processes	19	GO:0097284	hepatocyte apoptotic process	19_GO:0009987 cellular process	-2.9	13	5.9	30182	14	486	3	0.62	0.36	598|637|3875	BCL2L1|BID|KRT18	-1.5	MyList
GO Biological Processes	19	GO:0071305	cellular response to vitamin D	19_GO:0050896 response to stimulus	-2.9	13	5.9	30182	14	486	3	0.62	0.36	632|2242|54332	BGLAP|FES|GDAP1	-1.5	MyList
GO Biological Processes	19	GO:0071285	cellular response to lithium ion	19_GO:0050896 response to stimulus	-2.9	13	5.9	30182	14	486	3	0.62	0.36	999|1050|6469	CDH1|CEBPA|SHH	-1.5	MyList
GO Biological Processes	19	GO:0043086	negative regulation of catalytic activity	19_GO:0065007 biological regulation	-2.9	2.1	3.5	30182	666	486	22	4.5	0.94	207|1050|1476|1974|1992|3087|3698|4085|4846|4851|6224|6317|6546|7251|7453|9052|9711|23645|26173|27329|140686|140775	AKT1|CEBPA|CSTB|EIF4A2|SERPINB1|HHEX|ITIH2|MAD2L1|NOS3|NOTCH1|RPS20|SERPINB3|SLC8A1|TSG101|WARS1|GPRC5A|RUBCN|PPP1R15A|INTS1|ANGPTL3|WFDC3|SMCR8	-1.5	MyList
GO Biological Processes	19	GO:2000242	negative regulation of reproductive process	19_GO:0022414 reproductive process	-2.9	5	4.4	30182	75	486	6	1.2	0.5	598|2516|5017|6196|6615|6794	BCL2L1|NR5A1|OVOL1|RPS6KA2|SNAI1|STK11	-1.5	MyList
GO Biological Processes	19	GO:0035914	skeletal muscle cell differentiation	19_GO:0032502 developmental process	-2.9	6.1	4.7	30182	51	486	5	1	0.46	4851|6469|51676|63950|642658	NOTCH1|SHH|ASB2|DMRTA2|SCX	-1.5	MyList
GO Biological Processes	19	GO:0060972	left/right pattern formation	19_GO:0032502 developmental process	-2.9	3.8	4.1	30182	132	486	8	1.6	0.58	4851|6469|6615|6909|23500|25914|51098|51676	NOTCH1|SHH|SNAI1|TBX2|DAAM2|RTTN|IFT52|ASB2	-1.5	MyList
GO Biological Processes	19	GO:0090132	epithelium migration	19_GO:0032501 multicellular organismal process	-2.9	4.2	4.2	30182	103	486	7	1.4	0.54	207|3964|4846|6615|9839|23500|57175	AKT1|LGALS8|NOS3|SNAI1|ZEB2|DAAM2|CORO1B	-1.5	MyList
GO Biological Processes	19	GO:0072001	renal system development	19_GO:0032502 developmental process	-2.8	2.6	3.7	30182	305	486	13	2.7	0.73	1592|4851|5017|6469|7020|9863|11020|50484|64220|79191|79192|170690|282679	CYP26A1|NOTCH1|OVOL1|SHH|TFAP2A|MAGI2|IFT27|RRM2B|STRA6|IRX3|IRX1|ADAMTS16|AQP11	-1.5	MyList
Canonical Pathways	11	M45	PID CD40 PATHWAY		-2.8	8	5	30182	31	486	4	0.82	0.41	207|598|4792|7185	AKT1|BCL2L1|NFKBIA|TRAF1	-1.5	MyList
GO Biological Processes	19	GO:0072009	nephron epithelium development	19_GO:0032502 developmental process	-2.8	4.2	4.2	30182	104	486	7	1.4	0.54	4851|6469|9863|79191|79192|170690|282679	NOTCH1|SHH|MAGI2|IRX3|IRX1|ADAMTS16|AQP11	-1.5	MyList
GO Biological Processes	19	GO:0030001	metal ion transport	19_GO:0051179 localization	-2.8	2.1	3.5	30182	630	486	21	4.3	0.92	496|1139|2812|3741|3743|3954|4846|6340|6528|6546|7782|22821|27032|29985|54499|55515|55640|56479|89822|91749|113235	ATP4B|CHRNA7|GP1BB|KCNA5|KCNA7|LETM1|NOS3|SCNN1G|SLC5A5|SLC8A1|SLC30A4|RASA3|ATP2C1|SLC39A3|TMCO1|ASIC4|FLVCR2|KCNQ5|KCNK17|MFSD4B|SLC46A1	-1.5	MyList
GO Biological Processes	19	GO:0007519	skeletal muscle tissue development	19_GO:0032502 developmental process	-2.8	3.7	4	30182	134	486	8	1.6	0.58	1310|3142|4851|6469|9242|51676|63950|642658	COL19A1|HLX|NOTCH1|SHH|MSC|ASB2|DMRTA2|SCX	-1.5	MyList
GO Biological Processes	19	GO:0009855	determination of bilateral symmetry	19_GO:0032502 developmental process	-2.8	3.7	4	30182	134	486	8	1.6	0.58	4851|6469|6909|7479|23500|25914|51098|51676	NOTCH1|SHH|TBX2|WNT8B|DAAM2|RTTN|IFT52|ASB2	-1.5	MyList
GO Biological Processes	19	GO:0009799	specification of symmetry	19_GO:0032502 developmental process	-2.8	3.7	4	30182	135	486	8	1.6	0.58	4851|6469|6909|7479|23500|25914|51098|51676	NOTCH1|SHH|TBX2|WNT8B|DAAM2|RTTN|IFT52|ASB2	-1.5	MyList
GO Biological Processes	19	GO:0072594	establishment of protein localization to organelle	19_GO:0051179 localization	-2.8	2.5	3.6	30182	346	486	14	2.9	0.76	207|637|3098|3312|4792|4851|5903|6469|7251|23511|23534|23633|54332|134266	AKT1|BID|HK1|HSPA8|NFKBIA|NOTCH1|RANBP2|SHH|TSG101|NUP188|TNPO3|KPNA6|GDAP1|GRPEL2	-1.5	MyList
GO Biological Processes	19	GO:0050673	epithelial cell proliferation	19_GO:0009987 cellular process	-2.8	3.3	3.9	30182	167	486	9	1.9	0.61	598|1992|3142|4851|5017|6469|6794|6909|51098	BCL2L1|SERPINB1|HLX|NOTCH1|OVOL1|SHH|STK11|TBX2|IFT52	-1.5	MyList
GO Biological Processes	19	GO:0050801	monoatomic ion homeostasis	19_GO:0042592 homeostatic process	-2.8	2.2	3.5	30182	507	486	18	3.7	0.86	249|496|1139|3741|3954|6340|6546|7782|8614|9256|27032|54499|56172|56833|113235|151176|201140|282679	ALPL|ATP4B|CHRNA7|KCNA5|LETM1|SCNN1G|SLC8A1|SLC30A4|STC2|TSPOAP1|ATP2C1|TMCO1|ANKH|SLAMF8|SLC46A1|ERFE|DHRS7C|AQP11	-1.5	MyList
GO Biological Processes	19	GO:1901796	regulation of signal transduction by p53 class mediator	19_GO:0023052 signaling	-2.8	4.1	4.1	30182	106	486	7	1.4	0.54	207|6224|6615|6794|9958|50484|147746	AKT1|RPS20|SNAI1|STK11|USP15|RRM2B|HIPK4	-1.5	MyList
GO Biological Processes	19	GO:0061842	microtubule organizing center localization	19_GO:0051179 localization	-2.8	7.8	4.9	30182	32	486	4	0.82	0.41	4085|5903|7430|23353	MAD2L1|RANBP2|EZR|SUN1	-1.5	MyList
GO Biological Processes	19	GO:0051642	centrosome localization	19_GO:0051179 localization	-2.8	7.8	4.9	30182	32	486	4	0.82	0.41	4085|5903|7430|23353	MAD2L1|RANBP2|EZR|SUN1	-1.5	MyList
GO Biological Processes	19	GO:0031069	hair follicle morphogenesis	19_GO:0032502 developmental process	-2.8	7.8	4.9	30182	32	486	4	0.82	0.41	2304|4851|6469|6615	FOXE1|NOTCH1|SHH|SNAI1	-1.5	MyList
GO Biological Processes	19	GO:0007369	gastrulation	19_GO:0032502 developmental process	-2.8	3.3	3.9	30182	168	486	9	1.9	0.61	2116|3689|3690|6615|7479|23272|55578|83595|642658	ETV2|ITGB2|ITGB3|SNAI1|WNT8B|TASOR|SUPT20H|SOX7|SCX	-1.5	MyList
GO Biological Processes	19	GO:0040013	negative regulation of locomotion	19_GO:0040011 locomotion	-2.8	2.3	3.5	30182	427	486	16	3.3	0.81	207|999|2768|4851|6469|7075|8482|9466|9863|10014|10500|10672|51378|56833|56920|57175	AKT1|CDH1|GNA12|NOTCH1|SHH|TIE1|SEMA7A|IL27RA|MAGI2|HDAC5|SEMA6C|GNA13|ANGPT4|SLAMF8|SEMA3G|CORO1B	-1.5	MyList
GO Biological Processes	19	GO:0071407	cellular response to organic cyclic compound	19_GO:0050896 response to stimulus	-2.8	2.2	3.5	30182	510	486	18	3.7	0.86	249|632|999|1050|2242|3312|3638|4255|6340|6528|6546|6755|7430|8204|54332|55818|84458|115004	ALPL|BGLAP|CDH1|CEBPA|FES|HSPA8|INSIG1|MGMT|SCNN1G|SLC5A5|SLC8A1|SSTR5|EZR|NRIP1|GDAP1|KDM3A|LCOR|CGAS	-1.5	MyList
GO Biological Processes	19	GO:0006812	monoatomic cation transport	19_GO:0051179 localization	-2.8	1.9	3.4	30182	769	486	24	4.9	0.98	291|496|1139|2812|3741|3743|3954|4846|6340|6512|6528|6546|6564|7782|22821|27032|29985|54499|55515|55640|56479|89822|91749|113235	SLC25A4|ATP4B|CHRNA7|GP1BB|KCNA5|KCNA7|LETM1|NOS3|SCNN1G|SLC1A7|SLC5A5|SLC8A1|SLC15A1|SLC30A4|RASA3|ATP2C1|SLC39A3|TMCO1|ASIC4|FLVCR2|KCNQ5|KCNK17|MFSD4B|SLC46A1	-1.5	MyList
GO Biological Processes	19	GO:0045446	endothelial cell differentiation	19_GO:0032502 developmental process	-2.8	4.7	4.2	30182	79	486	6	1.2	0.5	2535|4851|7075|7430|27134|56033	FZD2|NOTCH1|TIE1|EZR|TJP3|BARX1	-1.5	MyList
GO Biological Processes	19	GO:0034645	cellular macromolecule biosynthetic process	19_GO:0008152 metabolic process	-2.8	1.9	3.4	30182	770	486	24	4.9	0.98	207|1938|1974|4528|6224|6235|7453|8893|9945|10402|10724|22856|23107|23521|27315|51373|51386|56945|60488|64506|64960|282679|619373|653082	AKT1|EEF2|EIF4A2|MTIF2|RPS20|RPS29|WARS1|EIF2B5|GFPT2|ST3GAL6|OGA|CHSY1|MRPS27|RPL13A|PGAP2|MRPS17|EIF3L|MRPS22|MRPS35|CPEB1|MRPS15|AQP11|MBOAT4|ZDHHC11B	-1.5	MyList
GO Biological Processes	19	GO:0008360	regulation of cell shape	19_GO:0032502 developmental process	-2.7	3.6	3.9	30182	138	486	8	1.6	0.58	755|2242|2768|3689|7430|8994|10672|23268	CFAP410|FES|GNA12|ITGB2|EZR|LIMD1|GNA13|DNMBP	-1.4	MyList
GO Biological Processes	19	GO:0030500	regulation of bone mineralization	19_GO:0032502 developmental process	-2.7	4.7	4.2	30182	80	486	6	1.2	0.5	632|6546|7020|9636|56172|387733	BGLAP|SLC8A1|TFAP2A|ISG15|ANKH|IFITM5	-1.4	MyList
GO Biological Processes	19	GO:0007548	sex differentiation	19_GO:0022414 reproductive process	-2.7	2.7	3.6	30182	276	486	12	2.5	0.7	598|2516|3172|3972|4846|6469|8204|8893|11085|63950|64220|642658	BCL2L1|NR5A1|HNF4A|LHB|NOS3|SHH|NRIP1|EIF2B5|ADAM30|DMRTA2|STRA6|SCX	-1.4	MyList
GO Biological Processes	19	GO:0002694	regulation of leukocyte activation	19_GO:0002376 immune system process	-2.7	2.1	3.4	30182	598	486	20	4.1	0.9	207|637|916|923|1050|2242|3111|3113|3142|3572|3689|4860|6469|9466|9473|27040|29851|30009|56833|115004	AKT1|BID|CD3E|CD6|CEBPA|FES|HLA-DOA|HLA-DPA1|HLX|IL6ST|ITGB2|PNP|SHH|IL27RA|THEMIS2|LAT|ICOS|TBX21|SLAMF8|CGAS	-1.4	MyList
KEGG Pathway	24	hsa05164	Influenza A		-2.7	3.3	3.8	30182	171	486	9	1.9	0.61	207|291|637|2224|3111|3113|3665|4792|23633	AKT1|SLC25A4|BID|FDPS|HLA-DOA|HLA-DPA1|IRF7|NFKBIA|KPNA6	-1.4	MyList
GO Biological Processes	19	GO:0060541	respiratory system development	19_GO:0032502 developmental process	-2.7	3	3.7	30182	205	486	10	2.1	0.64	1050|2324|4846|4851|6469|6909|9242|23521|53834|64220	CEBPA|FLT4|NOS3|NOTCH1|SHH|TBX2|MSC|RPL13A|FGFRL1|STRA6	-1.4	MyList
GO Biological Processes	19	GO:0090090	negative regulation of canonical Wnt signaling pathway	19_GO:0023052 signaling	-2.7	3.6	3.9	30182	139	486	8	1.6	0.58	4851|6469|6794|8994|10297|55716|83786|85409	NOTCH1|SHH|STK11|LIMD1|APC2|LMBR1L|FRMD8|NKD2	-1.4	MyList
GO Biological Processes	19	GO:0098771	inorganic ion homeostasis	19_GO:0042592 homeostatic process	-2.7	2.3	3.5	30182	433	486	16	3.3	0.81	249|496|1139|3741|3954|6340|6546|7782|8614|9256|27032|54499|56172|113235|151176|201140	ALPL|ATP4B|CHRNA7|KCNA5|LETM1|SCNN1G|SLC8A1|SLC30A4|STC2|TSPOAP1|ATP2C1|TMCO1|ANKH|SLC46A1|ERFE|DHRS7C	-1.4	MyList
KEGG Pathway	24	hsa04066	HIF-1 signaling pathway		-2.7	4	4	30182	109	486	7	1.4	0.54	207|3098|4846|5582|6923|7428|51378	AKT1|HK1|NOS3|PRKCG|ELOB|VHL|ANGPT4	-1.4	MyList
GO Biological Processes	19	GO:0090130	tissue migration	19_GO:0032501 multicellular organismal process	-2.7	4	4	30182	109	486	7	1.4	0.54	207|3964|4846|6615|9839|23500|57175	AKT1|LGALS8|NOS3|SNAI1|ZEB2|DAAM2|CORO1B	-1.4	MyList
GO Biological Processes	19	GO:0007586	digestion	19_GO:0032501 multicellular organismal process	-2.7	4	4	30182	109	486	7	1.4	0.54	2169|5225|7349|7430|79924|113235|643834	FABP2|PGC|UCN|EZR|ADM2|SLC46A1|PGA3	-1.4	MyList
GO Biological Processes	19	GO:0051235	maintenance of location	19_GO:0051179 localization	-2.7	3.2	3.8	30182	172	486	9	1.9	0.61	207|2516|3098|3638|4792|8204|8760|23353|27329	AKT1|NR5A1|HK1|INSIG1|NFKBIA|NRIP1|CDS2|SUN1|ANGPTL3	-1.4	MyList
GO Biological Processes	19	GO:0007596	blood coagulation	19_GO:0032501 multicellular organismal process	-2.7	3.2	3.8	30182	172	486	9	1.9	0.61	2768|2812|3172|3690|5627|6469|10627|10672|51206	GNA12|GP1BB|HNF4A|ITGB3|PROS1|SHH|MYL12A|GNA13|GP6	-1.4	MyList
GO Biological Processes	19	GO:2000241	regulation of reproductive process	19_GO:0022414 reproductive process	-2.7	3	3.7	30182	206	486	10	2.1	0.64	598|2516|3690|4851|5017|6196|6469|6615|6794|6954	BCL2L1|NR5A1|ITGB3|NOTCH1|OVOL1|RPS6KA2|SHH|SNAI1|STK11|TCP11	-1.4	MyList
GO Biological Processes	19	GO:0072080	nephron tubule development	19_GO:0032502 developmental process	-2.7	4.6	4.2	30182	81	486	6	1.2	0.5	4851|6469|79191|79192|170690|282679	NOTCH1|SHH|IRX3|IRX1|ADAMTS16|AQP11	-1.4	MyList
GO Biological Processes	19	GO:0055091	phospholipid homeostasis	19_GO:0042592 homeostatic process	-2.7	12	5.4	30182	16	486	3	0.62	0.36	1071|3172|27329	CETP|HNF4A|ANGPTL3	-1.4	MyList
GO Biological Processes	19	GO:2001242	regulation of intrinsic apoptotic signaling pathway	19_GO:0023052 signaling	-2.7	3.2	3.8	30182	173	486	9	1.9	0.61	207|598|637|6615|9958|10955|50484|138065|219790	AKT1|BCL2L1|BID|SNAI1|USP15|SERINC3|RRM2B|RNF183|RTKN2	-1.4	MyList
GO Biological Processes	19	GO:0098662	inorganic cation transmembrane transport	19_GO:0051179 localization	-2.7	2.1	3.4	30182	603	486	20	4.1	0.9	291|496|1139|2812|3741|3743|3954|6340|6528|6546|6564|7782|22821|27032|29985|54499|55515|56479|89822|113235	SLC25A4|ATP4B|CHRNA7|GP1BB|KCNA5|KCNA7|LETM1|SCNN1G|SLC5A5|SLC8A1|SLC15A1|SLC30A4|RASA3|ATP2C1|SLC39A3|TMCO1|ASIC4|KCNQ5|KCNK17|SLC46A1	-1.4	MyList
GO Biological Processes	19	GO:0001755	neural crest cell migration	19_GO:0032502 developmental process	-2.7	5.5	4.4	30182	56	486	5	1	0.46	6469|8482|10500|55698|56920	SHH|SEMA7A|SEMA6C|RADIL|SEMA3G	-1.4	MyList
Canonical Pathways	11	M99	PID TXA2PATHWAY		-2.7	5.5	4.4	30182	56	486	5	1	0.46	207|2768|4846|5582|10672	AKT1|GNA12|NOS3|PRKCG|GNA13	-1.4	MyList
GO Biological Processes	19	GO:0016032	viral process	19_GO:0016032 viral process	-2.7	2.8	3.6	30182	243	486	11	2.3	0.67	290|598|3665|3690|6317|7251|23633|51386|55207|90861|131578	ANPEP|BCL2L1|IRF7|ITGB3|SERPINB3|TSG101|KPNA6|EIF3L|ARL8B|JPT2|LRRC15	-1.4	MyList
GO Biological Processes	19	GO:0050817	coagulation	19_GO:0032501 multicellular organismal process	-2.7	3.2	3.7	30182	174	486	9	1.9	0.61	2768|2812|3172|3690|5627|6469|10627|10672|51206	GNA12|GP1BB|HNF4A|ITGB3|PROS1|SHH|MYL12A|GNA13|GP6	-1.4	MyList
GO Biological Processes	19	GO:0043604	amide biosynthetic process	19_GO:0008152 metabolic process	-2.7	2.1	3.4	30182	521	486	18	3.7	0.86	1050|1938|1974|3960|4528|6224|6235|7453|8893|9524|23107|23521|51373|51386|56945|60488|64506|64960	CEBPA|EEF2|EIF4A2|LGALS4|MTIF2|RPS20|RPS29|WARS1|EIF2B5|TECR|MRPS27|RPL13A|MRPS17|EIF3L|MRPS22|MRPS35|CPEB1|MRPS15	-1.4	MyList
GO Biological Processes	19	GO:0140053	mitochondrial gene expression	19_GO:0008152 metabolic process	-2.7	3.5	3.8	30182	142	486	8	1.6	0.58	4528|5442|23107|51106|51373|56945|60488|64960	MTIF2|POLRMT|MRPS27|TFB1M|MRPS17|MRPS22|MRPS35|MRPS15	-1.4	MyList
GO Biological Processes	19	GO:0098660	inorganic ion transmembrane transport	19_GO:0051179 localization	-2.6	2	3.3	30182	695	486	22	4.5	0.94	291|496|1139|2812|3741|3743|3954|6340|6512|6528|6546|6564|7782|22821|27032|29985|54499|55515|56172|56479|89822|113235	SLC25A4|ATP4B|CHRNA7|GP1BB|KCNA5|KCNA7|LETM1|SCNN1G|SLC1A7|SLC5A5|SLC8A1|SLC15A1|SLC30A4|RASA3|ATP2C1|SLC39A3|TMCO1|ASIC4|ANKH|KCNQ5|KCNK17|SLC46A1	-1.4	MyList
KEGG Pathway	24	hsa04015	Rap1 signaling pathway		-2.6	3	3.6	30182	210	486	10	2.1	0.64	207|999|2324|3689|3690|5582|9863|27006|27040|51378	AKT1|CDH1|FLT4|ITGB2|ITGB3|PRKCG|MAGI2|FGF22|LAT|ANGPT4	-1.4	MyList
GO Biological Processes	19	GO:0009617	response to bacterium	19_GO:0044419 biological process involved in interspecies interaction between organisms	-2.6	2	3.3	30182	696	486	22	4.5	0.94	207|249|496|923|999|3394|3960|4792|4846|4851|9450|9466|9516|9636|23097|23521|56833|79132|84419|89857|140686|646627	AKT1|ALPL|ATP4B|CD6|CDH1|IRF8|LGALS4|NFKBIA|NOS3|NOTCH1|LY86|IL27RA|LITAF|ISG15|CDK19|RPL13A|SLAMF8|DHX58|C15orf48|KLHL6|WFDC3|LYPD8	-1.4	MyList
GO Biological Processes	19	GO:1903900	regulation of viral life cycle	19_GO:0016032 viral process	-2.6	3.5	3.8	30182	143	486	8	1.6	0.58	4851|7251|9636|10465|10739|23272|23633|53840	NOTCH1|TSG101|ISG15|PPIH|RFPL2|TASOR|KPNA6|TRIM34	-1.4	MyList
GO Biological Processes	19	GO:0036294	cellular response to decreased oxygen levels	19_GO:0050896 response to stimulus	-2.6	3.5	3.8	30182	143	486	8	1.6	0.58	207|4851|6546|7428|8614|10449|51378|64506	AKT1|NOTCH1|SLC8A1|VHL|STC2|ACAA2|ANGPT4|CPEB1	-1.4	MyList
GO Biological Processes	19	GO:1902653	secondary alcohol biosynthetic process	19_GO:0008152 metabolic process	-2.6	7.1	4.6	30182	35	486	4	0.82	0.41	2224|3638|10449|91734	FDPS|INSIG1|ACAA2|IDI2	-1.4	MyList
GO Biological Processes	19	GO:0006695	cholesterol biosynthetic process	19_GO:0008152 metabolic process	-2.6	7.1	4.6	30182	35	486	4	0.82	0.41	2224|3638|10449|91734	FDPS|INSIG1|ACAA2|IDI2	-1.4	MyList
GO Biological Processes	19	GO:0008285	negative regulation of cell population proliferation	19_GO:0048519 negative regulation of biological process	-2.6	1.9	3.3	30182	787	486	24	4.9	0.98	1050|2768|3172|4330|4846|4851|4881|5017|6196|6469|6755|6794|7020|7251|7428|7453|9536|9863|10672|51098|53834|55079|83595|282679	CEBPA|GNA12|HNF4A|MN1|NOS3|NOTCH1|NPR1|OVOL1|RPS6KA2|SHH|SSTR5|STK11|TFAP2A|TSG101|VHL|WARS1|PTGES|MAGI2|GNA13|IFT52|FGFRL1|FEZF2|SOX7|AQP11	-1.4	MyList
GO Biological Processes	19	GO:0042176	regulation of protein catabolic process	19_GO:0008152 metabolic process	-2.6	2.4	3.4	30182	361	486	14	2.9	0.76	207|999|1050|2768|4085|5582|6469|6613|6923|7430|10297|23450|85409|282679	AKT1|CDH1|CEBPA|GNA12|MAD2L1|PRKCG|SHH|SUMO2|ELOB|EZR|APC2|SF3B3|NKD2|AQP11	-1.4	MyList
GO Biological Processes	19	GO:0008643	carbohydrate transport	19_GO:0051179 localization	-2.6	4.4	4	30182	84	486	6	1.2	0.5	207|7430|50651|91749|201140|282679	AKT1|EZR|SLC45A1|MFSD4B|DHRS7C|AQP11	-1.4	MyList
GO Biological Processes	19	GO:0070585	protein localization to mitochondrion	19_GO:0051179 localization	-2.6	4.4	4	30182	84	486	6	1.2	0.5	207|637|3098|9636|54332|134266	AKT1|BID|HK1|ISG15|GDAP1|GRPEL2	-1.4	MyList
GO Biological Processes	19	GO:0010763	positive regulation of fibroblast migration	19_GO:0040011 locomotion	-2.6	11	5.3	30182	17	486	3	0.62	0.36	207|3690|6546	AKT1|ITGB3|SLC8A1	-1.4	MyList
GO Biological Processes	19	GO:0002076	osteoblast development	19_GO:0032502 developmental process	-2.6	11	5.3	30182	17	486	3	0.62	0.36	632|6469|8994	BGLAP|SHH|LIMD1	-1.4	MyList
GO Biological Processes	19	GO:0055123	digestive system development	19_GO:0032502 developmental process	-2.6	3.5	3.8	30182	144	486	8	1.6	0.58	2304|3142|3572|4851|6469|6909|56033|64220	FOXE1|HLX|IL6ST|NOTCH1|SHH|TBX2|BARX1|STRA6	-1.4	MyList
GO Biological Processes	19	GO:0007599	hemostasis	19_GO:0065007 biological regulation	-2.6	3.2	3.7	30182	177	486	9	1.9	0.61	2768|2812|3172|3690|5627|6469|10627|10672|51206	GNA12|GP1BB|HNF4A|ITGB3|PROS1|SHH|MYL12A|GNA13|GP6	-1.4	MyList
GO Biological Processes	19	GO:0002460	adaptive immune response based on somatic recombination of immune receptors built from immunoglobulin superfamily domains	19_GO:0002376 immune system process	-2.6	3.2	3.7	30182	177	486	9	1.9	0.61	3111|3113|3142|3665|4063|4851|7374|30009|89857	HLA-DOA|HLA-DPA1|HLX|IRF7|LY9|NOTCH1|UNG|TBX21|KLHL6	-1.4	MyList
GO Biological Processes	19	GO:0008283	cell population proliferation	19_GO:0009987 cellular process	-2.6	2	3.3	30182	699	486	22	4.5	0.94	207|598|916|1050|1992|2242|3142|4851|5017|6469|6794|6909|9536|23107|26173|51098|55716|57096|63950|80169|84985|752014	AKT1|BCL2L1|CD3E|CEBPA|SERPINB1|FES|HLX|NOTCH1|OVOL1|SHH|STK11|TBX2|PTGES|MRPS27|INTS1|IFT52|LMBR1L|RPGRIP1|DMRTA2|CTC1|FAM83A|CEMP1	-1.4	MyList
GO Biological Processes	19	GO:0042733	embryonic digit morphogenesis	19_GO:0032502 developmental process	-2.6	5.4	4.2	30182	58	486	5	1	0.46	2768|4851|6469|6909|51098	GNA12|NOTCH1|SHH|TBX2|IFT52	-1.4	MyList
GO Biological Processes	19	GO:0090497	mesenchymal cell migration	19_GO:0009987 cellular process	-2.6	5.4	4.2	30182	58	486	5	1	0.46	6469|8482|10500|55698|56920	SHH|SEMA7A|SEMA6C|RADIL|SEMA3G	-1.4	MyList
GO Biological Processes	19	GO:1903131	mononuclear cell differentiation	19_GO:0032502 developmental process	-2.6	2.5	3.5	30182	324	486	13	2.7	0.73	916|3087|3142|3394|4063|4242|6469|6794|10014|10320|30009|55716|56833	CD3E|HHEX|HLX|IRF8|LY9|MFNG|SHH|STK11|HDAC5|IKZF1|TBX21|LMBR1L|SLAMF8	-1.3	MyList
GO Biological Processes	19	GO:0016331	morphogenesis of embryonic epithelium	19_GO:0032502 developmental process	-2.6	3.4	3.7	30182	145	486	8	1.6	0.58	2535|7020|10522|27443|51098|79191|79192|151449	FZD2|TFAP2A|DEAF1|CECR2|IFT52|IRX3|IRX1|GDF7	-1.3	MyList
GO Biological Processes	19	GO:0031397	negative regulation of protein ubiquitination	19_GO:0048519 negative regulation of biological process	-2.6	4.4	4	30182	85	486	6	1.2	0.5	207|4085|5582|6224|9636|64359	AKT1|MAD2L1|PRKCG|RPS20|ISG15|NXN	-1.3	MyList
GO Biological Processes	19	GO:0030097	hemopoiesis	19_GO:0032502 developmental process	-2.6	2	3.3	30182	659	486	21	4.3	0.92	916|1050|1938|2116|2812|3087|3142|3213|3394|4063|4242|6469|6794|10014|10320|23218|30009|55716|56833|80169|219790	CD3E|CEBPA|EEF2|ETV2|GP1BB|HHEX|HLX|HOXB3|IRF8|LY9|MFNG|SHH|STK11|HDAC5|IKZF1|NBEAL2|TBX21|LMBR1L|SLAMF8|CTC1|RTKN2	-1.3	MyList
GO Biological Processes	19	GO:0035107	appendage morphogenesis	19_GO:0032502 developmental process	-2.6	3.4	3.7	30182	146	486	8	1.6	0.58	1750|2768|4851|6469|6909|7020|23288|51098	DLX6|GNA12|NOTCH1|SHH|TBX2|TFAP2A|IQCE|IFT52	-1.3	MyList
GO Biological Processes	19	GO:0035108	limb morphogenesis	19_GO:0032502 developmental process	-2.6	3.4	3.7	30182	146	486	8	1.6	0.58	1750|2768|4851|6469|6909|7020|23288|51098	DLX6|GNA12|NOTCH1|SHH|TBX2|TFAP2A|IQCE|IFT52	-1.3	MyList
GO Biological Processes	19	GO:0048730	epidermis morphogenesis	19_GO:0032502 developmental process	-2.6	6.9	4.5	30182	36	486	4	0.82	0.41	2304|4851|6469|6615	FOXE1|NOTCH1|SHH|SNAI1	-1.3	MyList
GO Biological Processes	19	GO:0060348	bone development	19_GO:0032502 developmental process	-2.6	2.9	3.6	30182	214	486	10	2.1	0.64	249|632|2812|3638|5636|7020|22856|80169|387733|642658	ALPL|BGLAP|GP1BB|INSIG1|PRPSAP2|TFAP2A|CHSY1|CTC1|IFITM5|SCX	-1.3	MyList
GO Biological Processes	19	GO:0061326	renal tubule development	19_GO:0032502 developmental process	-2.6	4.3	4	30182	86	486	6	1.2	0.5	4851|6469|79191|79192|170690|282679	NOTCH1|SHH|IRX3|IRX1|ADAMTS16|AQP11	-1.3	MyList
KEGG Pathway	24	hsa05224	Breast cancer		-2.6	3.4	3.7	30182	147	486	8	1.6	0.58	207|2324|2535|4851|7479|10297|27006|81029	AKT1|FLT4|FZD2|NOTCH1|WNT8B|APC2|FGF22|WNT5B	-1.3	MyList
GO Biological Processes	19	GO:0006633	fatty acid biosynthetic process	19_GO:0008152 metabolic process	-2.6	3.7	3.8	30182	116	486	7	1.4	0.54	239|9524|9536|27349|55258|55301|127281	ALOX12|TECR|PTGES|MCAT|THNSL2|OLAH|PRXL2B	-1.3	MyList
GO Biological Processes	19	GO:0022407	regulation of cell-cell adhesion	19_GO:0050789 regulation of biological process	-2.6	2.2	3.3	30182	491	486	17	3.5	0.83	207|239|916|923|999|3111|3113|3142|3572|3689|4851|4860|6469|29851|30009|51206|114897	AKT1|ALOX12|CD3E|CD6|CDH1|HLA-DOA|HLA-DPA1|HLX|IL6ST|ITGB2|NOTCH1|PNP|SHH|ICOS|TBX21|GP6|C1QTNF1	-1.3	MyList
GO Biological Processes	19	GO:0007584	response to nutrient	19_GO:0050896 response to stimulus	-2.5	3.4	3.7	30182	148	486	8	1.6	0.58	249|632|1592|2242|4255|6546|8614|54332	ALPL|BGLAP|CYP26A1|FES|MGMT|SLC8A1|STC2|GDAP1	-1.3	MyList
GO Biological Processes	19	GO:0036303	lymph vessel morphogenesis	19_GO:0032502 developmental process	-2.5	10	5.1	30182	18	486	3	0.62	0.36	2324|3964|7075	FLT4|LGALS8|TIE1	-1.3	MyList
GO Biological Processes	19	GO:0043369	CD4-positive or CD8-positive, alpha-beta T cell lineage commitment	19_GO:0002376 immune system process	-2.5	10	5.1	30182	18	486	3	0.62	0.36	4063|6469|30009	LY9|SHH|TBX21	-1.3	MyList
Reactome Gene Sets	6	R-HSA-1912420	Pre-NOTCH Processing in Golgi		-2.5	10	5.1	30182	18	486	3	0.62	0.36	4242|4851|10402	MFNG|NOTCH1|ST3GAL6	-1.3	MyList
Reactome Gene Sets	6	R-HSA-5368286	Mitochondrial translation initiation		-2.5	4.3	3.9	30182	87	486	6	1.2	0.5	4528|23107|51373|56945|60488|64960	MTIF2|MRPS27|MRPS17|MRPS22|MRPS35|MRPS15	-1.3	MyList
GO Biological Processes	19	GO:0061024	membrane organization	19_GO:0009987 cellular process	-2.5	1.9	3.2	30182	754	486	23	4.7	0.96	207|291|598|637|1071|1793|1861|3312|3689|3954|6677|7075|7251|9378|10449|11336|23353|23616|27032|28988|55207|55288|85409	AKT1|SLC25A4|BCL2L1|BID|CETP|DOCK1|TOR1A|HSPA8|ITGB2|LETM1|SPAM1|TIE1|TSG101|NRXN1|ACAA2|EXOC3|SUN1|SH3BP1|ATP2C1|DBNL|ARL8B|RHOT1|NKD2	-1.3	MyList
GO Biological Processes	19	GO:0034110	regulation of homotypic cell-cell adhesion	19_GO:0050789 regulation of biological process	-2.5	6.7	4.4	30182	37	486	4	0.82	0.41	239|3572|51206|114897	ALOX12|IL6ST|GP6|C1QTNF1	-1.3	MyList
Reactome Gene Sets	6	R-HSA-3108232	SUMO E3 ligases SUMOylate target proteins		-2.5	3.1	3.6	30182	182	486	9	1.9	0.61	1912|2516|4792|5903|6613|7020|7428|8204|23511	PHC2|NR5A1|NFKBIA|RANBP2|SUMO2|TFAP2A|VHL|NRIP1|NUP188	-1.3	MyList
Reactome Gene Sets	6	R-HSA-112316	Neuronal System		-2.5	2.3	3.3	30182	410	486	15	3.1	0.78	1139|3312|3556|3741|3743|5582|6196|6512|9256|9378|27165|28988|56479|89822|143425	CHRNA7|HSPA8|IL1RAP|KCNA5|KCNA7|PRKCG|RPS6KA2|SLC1A7|TSPOAP1|NRXN1|GLS2|DBNL|KCNQ5|KCNK17|SYT9	-1.3	MyList
GO Biological Processes	19	GO:0030323	respiratory tube development	19_GO:0032502 developmental process	-2.5	3	3.5	30182	184	486	9	1.9	0.61	1050|2324|4846|4851|6469|6909|23521|51696|64220	CEBPA|FLT4|NOS3|NOTCH1|SHH|TBX2|RPL13A|HECA|STRA6	-1.3	MyList
GO Biological Processes	19	GO:0007167	enzyme-linked receptor protein signaling pathway	19_GO:0023052 signaling	-2.5	2	3.2	30182	626	486	20	4.1	0.9	207|916|2116|2324|3172|3572|3690|4881|6909|7075|9770|9863|9958|27006|51206|53834|64762|84985|151449|642658	AKT1|CD3E|ETV2|FLT4|HNF4A|IL6ST|ITGB3|NPR1|TBX2|TIE1|RASSF2|MAGI2|USP15|FGF22|GP6|FGFRL1|GAREM1|FAM83A|GDF7|SCX	-1.3	MyList
GO Biological Processes	19	GO:0003180	aortic valve morphogenesis	19_GO:0032502 developmental process	-2.5	6.5	4.4	30182	38	486	4	0.82	0.41	4846|4851|6615|7075	NOS3|NOTCH1|SNAI1|TIE1	-1.3	MyList
KEGG Pathway	24	hsa05340	Primary immunodeficiency		-2.5	6.5	4.4	30182	38	486	4	0.82	0.41	916|3543|7374|29851	CD3E|IGLL1|UNG|ICOS	-1.3	MyList
GO Biological Processes	19	GO:0010821	regulation of mitochondrion organization	19_GO:0050789 regulation of biological process	-2.5	3.3	3.6	30182	151	486	8	1.6	0.58	207|291|598|637|8739|10449|55288|64423	AKT1|SLC25A4|BCL2L1|BID|HRK|ACAA2|RHOT1|INF2	-1.3	MyList
GO Biological Processes	19	GO:0045596	negative regulation of cell differentiation	19_GO:0032502 developmental process	-2.5	1.9	3.1	30182	716	486	22	4.5	0.94	999|1050|1071|3142|3638|3690|4792|4851|5309|6469|6615|8482|8994|10014|10500|23500|30009|55079|56920|79191|122953|645425	CDH1|CEBPA|CETP|HLX|INSIG1|ITGB3|NFKBIA|NOTCH1|PITX3|SHH|SNAI1|SEMA7A|LIMD1|HDAC5|SEMA6C|DAAM2|TBX21|FEZF2|SEMA3G|IRX3|JDP2|PRAMEF20	-1.3	MyList
GO Biological Processes	19	GO:0046902	regulation of mitochondrial membrane permeability	19_GO:0051179 localization	-2.5	5	4	30182	62	486	5	1	0.46	291|598|637|10449|55288	SLC25A4|BCL2L1|BID|ACAA2|RHOT1	-1.3	MyList
GO Biological Processes	19	GO:0009895	negative regulation of catabolic process	19_GO:0048519 negative regulation of biological process	-2.5	2.4	3.3	30182	335	486	13	2.7	0.73	207|3834|4085|5582|6469|7428|9711|9967|10644|23450|55544|140775|282679	AKT1|KIF25|MAD2L1|PRKCG|SHH|VHL|RUBCN|THRAP3|IGF2BP2|SF3B3|RBM38|SMCR8|AQP11	-1.3	MyList
GO Biological Processes	19	GO:0003184	pulmonary valve morphogenesis	19_GO:0032502 developmental process	-2.5	9.8	4.9	30182	19	486	3	0.62	0.36	4846|4851|64220	NOS3|NOTCH1|STRA6	-1.3	MyList
GO Biological Processes	19	GO:0034244	negative regulation of transcription elongation by RNA polymerase II	19_GO:0048519 negative regulation of biological process	-2.5	9.8	4.9	30182	19	486	3	0.62	0.36	6469|7428|51497	SHH|VHL|NELFCD	-1.3	MyList
GO Biological Processes	19	GO:0045061	thymic T cell selection	19_GO:0002376 immune system process	-2.5	9.8	4.9	30182	19	486	3	0.62	0.36	916|6469|6794	CD3E|SHH|STK11	-1.3	MyList
GO Biological Processes	19	GO:0010544	negative regulation of platelet activation	19_GO:0048519 negative regulation of biological process	-2.5	9.8	4.9	30182	19	486	3	0.62	0.36	239|4846|114897	ALOX12|NOS3|C1QTNF1	-1.3	MyList
GO Biological Processes	19	GO:0030326	embryonic limb morphogenesis	19_GO:0032502 developmental process	-2.5	3.6	3.7	30182	120	486	7	1.4	0.54	1750|2768|4851|6469|6909|7020|51098	DLX6|GNA12|NOTCH1|SHH|TBX2|TFAP2A|IFT52	-1.3	MyList
GO Biological Processes	19	GO:0035113	embryonic appendage morphogenesis	19_GO:0032502 developmental process	-2.5	3.6	3.7	30182	120	486	7	1.4	0.54	1750|2768|4851|6469|6909|7020|51098	DLX6|GNA12|NOTCH1|SHH|TBX2|TFAP2A|IFT52	-1.3	MyList
GO Biological Processes	19	GO:0055007	cardiac muscle cell differentiation	19_GO:0032502 developmental process	-2.5	4.1	3.8	30182	90	486	6	1.2	0.5	2274|6546|10529|51676|79191|84700	FHL2|SLC8A1|NEBL|ASB2|IRX3|MYO18B	-1.3	MyList
KEGG Pathway	24	hsa05217	Basal cell carcinoma		-2.5	4.9	4	30182	63	486	5	1	0.46	2535|6469|7479|10297|81029	FZD2|SHH|WNT8B|APC2|WNT5B	-1.2	MyList
KEGG Pathway	24	hsa03250	Viral life cycle - HIV-1		-2.5	4.9	4	30182	63	486	5	1	0.46	5903|7251|10955|23534|51497	RANBP2|TSG101|SERINC3|TNPO3|NELFCD	-1.2	MyList
GO Biological Processes	19	GO:0032368	regulation of lipid transport	19_GO:0051179 localization	-2.5	3.2	3.6	30182	153	486	8	1.6	0.58	207|1071|3690|4792|6469|9536|114897|151176	AKT1|CETP|ITGB3|NFKBIA|SHH|PTGES|C1QTNF1|ERFE	-1.2	MyList
GO Biological Processes	19	GO:0050863	regulation of T cell activation	19_GO:0002376 immune system process	-2.5	2.3	3.3	30182	377	486	14	2.9	0.76	207|637|916|923|3111|3113|3142|3572|4860|6469|27040|29851|30009|115004	AKT1|BID|CD3E|CD6|HLA-DOA|HLA-DPA1|HLX|IL6ST|PNP|SHH|LAT|ICOS|TBX21|CGAS	-1.2	MyList
GO Biological Processes	19	GO:0048732	gland development	19_GO:0032502 developmental process	-2.5	2.2	3.2	30182	418	486	15	3.1	0.78	207|999|1050|2304|2516|3142|3213|4255|4851|6469|6794|6909|64220|80169|151449	AKT1|CDH1|CEBPA|FOXE1|NR5A1|HLX|HOXB3|MGMT|NOTCH1|SHH|STK11|TBX2|STRA6|CTC1|GDF7	-1.2	MyList
GO Biological Processes	19	GO:0098742	cell-cell adhesion via plasma-membrane adhesion molecules	19_GO:0009987 cellular process	-2.5	2.6	3.4	30182	260	486	11	2.3	0.67	923|999|3556|3689|8404|27032|53834|56097|56121|79633|653499	CD6|CDH1|IL1RAP|ITGB2|SPARCL1|ATP2C1|FGFRL1|PCDHGC5|PCDHB15|FAT4|LGALS7B	-1.2	MyList
GO Biological Processes	19	GO:0006692	prostanoid metabolic process	19_GO:0008152 metabolic process	-2.5	6.4	4.3	30182	39	486	4	0.82	0.41	8824|9536|11283|127281	CES2|PTGES|CYP4F8|PRXL2B	-1.2	MyList
GO Biological Processes	19	GO:0006693	prostaglandin metabolic process	19_GO:0008152 metabolic process	-2.5	6.4	4.3	30182	39	486	4	0.82	0.41	8824|9536|11283|127281	CES2|PTGES|CYP4F8|PRXL2B	-1.2	MyList
GO Biological Processes	19	GO:0050678	regulation of epithelial cell proliferation	19_GO:0050789 regulation of biological process	-2.4	2.2	3.2	30182	419	486	15	3.1	0.78	207|637|1750|2324|3142|3690|4851|5017|6469|6794|7075|10522|51098|51162|282679	AKT1|BID|DLX6|FLT4|HLX|ITGB3|NOTCH1|OVOL1|SHH|STK11|TIE1|DEAF1|IFT52|EGFL7|AQP11	-1.2	MyList
GO Biological Processes	19	GO:0031400	negative regulation of protein modification process	19_GO:0048519 negative regulation of biological process	-2.4	2.1	3.2	30182	503	486	17	3.5	0.83	207|1050|3087|4085|5582|6224|6317|6546|7251|7453|9052|9636|9770|23645|64359|84063|140775	AKT1|CEBPA|HHEX|MAD2L1|PRKCG|RPS20|SERPINB3|SLC8A1|TSG101|WARS1|GPRC5A|ISG15|RASSF2|PPP1R15A|NXN|KIRREL2|SMCR8	-1.2	MyList
GO Biological Processes	19	GO:0051249	regulation of lymphocyte activation	19_GO:0002376 immune system process	-2.4	2.1	3.2	30182	503	486	17	3.5	0.83	207|637|916|923|3111|3113|3142|3572|4860|6469|9466|9473|27040|29851|30009|56833|115004	AKT1|BID|CD3E|CD6|HLA-DOA|HLA-DPA1|HLX|IL6ST|PNP|SHH|IL27RA|THEMIS2|LAT|ICOS|TBX21|SLAMF8|CGAS	-1.2	MyList
GO Biological Processes	19	GO:0001947	heart looping	19_GO:0032502 developmental process	-2.4	4.9	3.9	30182	64	486	5	1	0.46	4851|6469|6909|51098|51676	NOTCH1|SHH|TBX2|IFT52|ASB2	-1.2	MyList
GO Biological Processes	19	GO:0055013	cardiac muscle cell development	19_GO:0032502 developmental process	-2.4	4.9	3.9	30182	64	486	5	1	0.46	2274|6546|10529|51676|84700	FHL2|SLC8A1|NEBL|ASB2|MYO18B	-1.2	MyList
GO Biological Processes	19	GO:0055074	calcium ion homeostasis	19_GO:0042592 homeostatic process	-2.4	2.8	3.4	30182	225	486	10	2.1	0.64	249|1139|3954|6546|8614|9256|27032|54499|56172|201140	ALPL|CHRNA7|LETM1|SLC8A1|STC2|TSPOAP1|ATP2C1|TMCO1|ANKH|DHRS7C	-1.2	MyList
GO Biological Processes	19	GO:0045185	maintenance of protein location	19_GO:0051179 localization	-2.4	4.1	3.7	30182	92	486	6	1.2	0.5	207|2516|3098|3638|4792|23353	AKT1|NR5A1|HK1|INSIG1|NFKBIA|SUN1	-1.2	MyList
GO Biological Processes	19	GO:0030162	regulation of proteolysis	19_GO:0008152 metabolic process	-2.4	1.9	3.1	30182	726	486	22	4.5	0.94	207|637|1050|1476|1992|2768|3698|4255|5582|6196|6317|6469|6613|6923|7428|7850|26173|51098|83595|85409|140686|282679	AKT1|BID|CEBPA|CSTB|SERPINB1|GNA12|ITIH2|MGMT|PRKCG|RPS6KA2|SERPINB3|SHH|SUMO2|ELOB|VHL|IL1R2|INTS1|IFT52|SOX7|NKD2|WFDC3|AQP11	-1.2	MyList
GO Biological Processes	19	GO:0046649	lymphocyte activation	19_GO:0002376 immune system process	-2.4	2.1	3.2	30182	464	486	16	3.3	0.81	916|923|3087|3142|3394|4063|4242|6469|6794|7374|10014|10320|27040|30009|55716|56833	CD3E|CD6|HHEX|HLX|IRF8|LY9|MFNG|SHH|STK11|UNG|HDAC5|IKZF1|LAT|TBX21|LMBR1L|SLAMF8	-1.2	MyList
GO Biological Processes	19	GO:0003203	endocardial cushion morphogenesis	19_GO:0032502 developmental process	-2.4	6.2	4.2	30182	40	486	4	0.82	0.41	4846|4851|6615|6909	NOS3|NOTCH1|SNAI1|TBX2	-1.2	MyList
KEGG Pathway	24	hsa04150	mTOR signaling pathway		-2.4	3.2	3.5	30182	156	486	8	1.6	0.58	207|2535|5582|6196|6794|7479|9675|81029	AKT1|FZD2|PRKCG|RPS6KA2|STK11|WNT8B|TTI1|WNT5B	-1.2	MyList
GO Biological Processes	19	GO:0044403	biological process involved in symbiotic interaction	19_GO:0044419 biological process involved in interspecies interaction between organisms	-2.4	2.6	3.3	30182	264	486	11	2.3	0.67	290|598|3312|3429|3690|6317|7251|10189|55207|90861|131578	ANPEP|BCL2L1|HSPA8|IFI27|ITGB3|SERPINB3|TSG101|ALYREF|ARL8B|JPT2|LRRC15	-1.2	MyList
Reactome Gene Sets	6	R-HSA-5368287	Mitochondrial translation		-2.4	4	3.7	30182	93	486	6	1.2	0.5	4528|23107|51373|56945|60488|64960	MTIF2|MRPS27|MRPS17|MRPS22|MRPS35|MRPS15	-1.2	MyList
GO Biological Processes	19	GO:0032507	maintenance of protein location in cell	19_GO:0051179 localization	-2.4	4.8	3.9	30182	65	486	5	1	0.46	207|2516|3098|3638|23353	AKT1|NR5A1|HK1|INSIG1|SUN1	-1.2	MyList
Canonical Pathways	11	M15	PID LYSOPHOSPHOLIPID PATHWAY		-2.4	4.8	3.9	30182	65	486	5	1	0.46	147|207|2768|4792|10672	ADRA1B|AKT1|GNA12|NFKBIA|GNA13	-1.2	MyList
GO Biological Processes	19	GO:0001838	embryonic epithelial tube formation	19_GO:0032502 developmental process	-2.4	3.5	3.6	30182	124	486	7	1.4	0.54	2535|10522|27443|51098|79191|79192|151449	FZD2|DEAF1|CECR2|IFT52|IRX3|IRX1|GDF7	-1.2	MyList
KEGG Pathway	24	hsa04611	Platelet activation		-2.4	3.5	3.6	30182	124	486	7	1.4	0.54	207|2812|3690|4846|10627|10672|51206	AKT1|GP1BB|ITGB3|NOS3|MYL12A|GNA13|GP6	-1.2	MyList
GO Biological Processes	19	GO:0006897	endocytosis	19_GO:0051179 localization	-2.4	2.2	3.2	30182	425	486	15	3.1	0.78	433|598|923|1793|3689|6469|7430|8578|9711|9863|23616|28988|55716|80230|90861	ASGR2|BCL2L1|CD6|DOCK1|ITGB2|SHH|EZR|SCARF1|RUBCN|MAGI2|SH3BP1|DBNL|LMBR1L|RUFY1|JPT2	-1.2	MyList
GO Biological Processes	19	GO:0046394	carboxylic acid biosynthetic process	19_GO:0008152 metabolic process	-2.4	2.6	3.3	30182	266	486	11	2.3	0.67	239|9524|9536|10955|23743|27165|27349|55258|55301|114876|127281	ALOX12|TECR|PTGES|SERINC3|BHMT2|GLS2|MCAT|THNSL2|OLAH|OSBPL1A|PRXL2B	-1.2	MyList
GO Biological Processes	19	GO:1901615	organic hydroxy compound metabolic process	19_GO:0008152 metabolic process	-2.4	2.1	3.1	30182	468	486	16	3.3	0.81	239|249|1050|1071|1592|2224|2304|2820|3638|4881|6528|8578|10449|27329|91734|114876	ALOX12|ALPL|CEBPA|CETP|CYP26A1|FDPS|FOXE1|GPD2|INSIG1|NPR1|SLC5A5|SCARF1|ACAA2|ANGPTL3|IDI2|OSBPL1A	-1.2	MyList
Reactome Gene Sets	6	R-HSA-159231	Transport of Mature mRNA Derived from an Intronless Transcript		-2.4	6.1	4.1	30182	41	486	4	0.82	0.41	5903|10189|23511|55339	RANBP2|ALYREF|NUP188|WDR33	-1.2	MyList
GO Biological Processes	19	GO:0071526	semaphorin-plexin signaling pathway	19_GO:0023052 signaling	-2.4	6.1	4.1	30182	41	486	4	0.82	0.41	8482|10500|23616|56920	SEMA7A|SEMA6C|SH3BP1|SEMA3G	-1.2	MyList
GO Biological Processes	19	GO:0071453	cellular response to oxygen levels	19_GO:0050896 response to stimulus	-2.4	3.1	3.5	30182	158	486	8	1.6	0.58	207|4851|6546|7428|8614|10449|51378|64506	AKT1|NOTCH1|SLC8A1|VHL|STC2|ACAA2|ANGPT4|CPEB1	-1.2	MyList
GO Biological Processes	19	GO:1903050	regulation of proteolysis involved in protein catabolic process	19_GO:0008152 metabolic process	-2.4	2.7	3.3	30182	230	486	10	2.1	0.64	207|1050|2768|5582|6469|6613|6923|7428|85409|282679	AKT1|CEBPA|GNA12|PRKCG|SHH|SUMO2|ELOB|VHL|NKD2|AQP11	-1.2	MyList
GO Biological Processes	19	GO:0061136	regulation of proteasomal protein catabolic process	19_GO:0008152 metabolic process	-2.4	2.9	3.4	30182	194	486	9	1.9	0.61	207|1050|2768|5582|6469|6613|6923|85409|282679	AKT1|CEBPA|GNA12|PRKCG|SHH|SUMO2|ELOB|NKD2|AQP11	-1.2	MyList
GO Biological Processes	19	GO:0007189	adenylate cyclase-activating G protein-coupled receptor signaling pathway	19_GO:0023052 signaling	-2.4	3.5	3.5	30182	126	486	7	1.4	0.54	147|577|6954|10672|79924|122876|266977	ADRA1B|ADGRB3|TCP11|GNA13|ADM2|GPHB5|ADGRF1	-1.2	MyList
GO Biological Processes	19	GO:0003158	endothelium development	19_GO:0032502 developmental process	-2.4	3.9	3.6	30182	95	486	6	1.2	0.5	2535|4851|7075|7430|27134|56033	FZD2|NOTCH1|TIE1|EZR|TJP3|BARX1	-1.2	MyList
GO Biological Processes	19	GO:0007517	muscle organ development	19_GO:0032502 developmental process	-2.4	2.4	3.2	30182	307	486	12	2.5	0.7	1310|2535|3142|4851|6469|9242|22801|51676|53834|63950|64220|642658	COL19A1|FZD2|HLX|NOTCH1|SHH|MSC|ITGA11|ASB2|FGFRL1|DMRTA2|STRA6|SCX	-1.2	MyList
GO Biological Processes	19	GO:0072330	monocarboxylic acid biosynthetic process	19_GO:0008152 metabolic process	-2.3	3.1	3.4	30182	160	486	8	1.6	0.58	239|9524|9536|27349|55258|55301|114876|127281	ALOX12|TECR|PTGES|MCAT|THNSL2|OLAH|OSBPL1A|PRXL2B	-1.2	MyList
GO Biological Processes	19	GO:0009725	response to hormone	19_GO:0050896 response to stimulus	-2.3	1.8	3	30182	784	486	23	4.7	0.96	207|249|632|2274|2354|2516|3312|3638|3690|3972|4846|4851|6340|6528|6755|6794|7349|8614|8893|10014|27329|55818|64506	AKT1|ALPL|BGLAP|FHL2|FOSB|NR5A1|HSPA8|INSIG1|ITGB3|LHB|NOS3|NOTCH1|SCNN1G|SLC5A5|SSTR5|STK11|UCN|STC2|EIF2B5|HDAC5|ANGPTL3|KDM3A|CPEB1	-1.2	MyList
Reactome Gene Sets	6	R-HSA-163841	Gamma carboxylation, hypusine formation and arylsulfatase activation		-2.3	5.9	4.1	30182	42	486	4	0.82	0.41	632|1938|5627|79642	BGLAP|EEF2|PROS1|ARSJ	-1.2	MyList
GO Biological Processes	19	GO:0016126	sterol biosynthetic process	19_GO:0008152 metabolic process	-2.3	5.9	4.1	30182	42	486	4	0.82	0.41	2224|3638|10449|91734	FDPS|INSIG1|ACAA2|IDI2	-1.2	MyList
Reactome Gene Sets	6	R-HSA-159234	Transport of Mature mRNAs Derived from Intronless Transcripts		-2.3	5.9	4.1	30182	42	486	4	0.82	0.41	5903|10189|23511|55339	RANBP2|ALYREF|NUP188|WDR33	-1.2	MyList
GO Biological Processes	19	GO:0007368	determination of left/right symmetry	19_GO:0032502 developmental process	-2.3	3.4	3.5	30182	127	486	7	1.4	0.54	4851|6469|6909|23500|25914|51098|51676	NOTCH1|SHH|TBX2|DAAM2|RTTN|IFT52|ASB2	-1.2	MyList
GO Biological Processes	19	GO:0048593	camera-type eye morphogenesis	19_GO:0032502 developmental process	-2.3	3.4	3.5	30182	127	486	7	1.4	0.54	4851|5309|6909|7020|50939|57096|64220	NOTCH1|PITX3|TBX2|TFAP2A|IMPG2|RPGRIP1|STRA6	-1.2	MyList
GO Biological Processes	19	GO:0016053	organic acid biosynthetic process	19_GO:0008152 metabolic process	-2.3	2.5	3.2	30182	270	486	11	2.3	0.67	239|9524|9536|10955|23743|27165|27349|55258|55301|114876|127281	ALOX12|TECR|PTGES|SERINC3|BHMT2|GLS2|MCAT|THNSL2|OLAH|OSBPL1A|PRXL2B	-1.2	MyList
GO Biological Processes	19	GO:1903321	negative regulation of protein modification by small protein conjugation or removal	19_GO:0048519 negative regulation of biological process	-2.3	3.8	3.6	30182	97	486	6	1.2	0.5	207|4085|5582|6224|9636|64359	AKT1|MAD2L1|PRKCG|RPS20|ISG15|NXN	-1.1	MyList
GO Biological Processes	19	GO:0003176	aortic valve development	19_GO:0032502 developmental process	-2.3	5.8	4	30182	43	486	4	0.82	0.41	4846|4851|6615|7075	NOS3|NOTCH1|SNAI1|TIE1	-1.1	MyList
Canonical Pathways	11	M238	PID THROMBIN PAR1 PATHWAY		-2.3	5.8	4	30182	43	486	4	0.82	0.41	2768|4846|5582|10672	GNA12|NOS3|PRKCG|GNA13	-1.1	MyList
GO Biological Processes	19	GO:0098781	ncRNA transcription	19_GO:0008152 metabolic process	-2.3	5.8	4	30182	43	486	4	0.82	0.41	9014|10302|84172|112495	TAF1B|SNAPC5|POLR1B|GTF3C6	-1.1	MyList
GO Biological Processes	19	GO:0060412	ventricular septum morphogenesis	19_GO:0032502 developmental process	-2.3	5.8	4	30182	43	486	4	0.82	0.41	2535|4846|4851|53834	FZD2|NOS3|NOTCH1|FGFRL1	-1.1	MyList
GO Biological Processes	19	GO:1903039	positive regulation of leukocyte cell-cell adhesion	19_GO:0048518 positive regulation of biological process	-2.3	2.5	3.2	30182	273	486	11	2.3	0.67	207|916|923|3111|3113|3142|3572|3689|4860|6469|29851	AKT1|CD3E|CD6|HLA-DOA|HLA-DPA1|HLX|IL6ST|ITGB2|PNP|SHH|ICOS	-1.1	MyList
GO Biological Processes	19	GO:0045087	innate immune response	19_GO:0044419 biological process involved in interspecies interaction between organisms	-2.3	1.8	2.9	30182	745	486	22	4.5	0.94	923|3098|3113|3394|3429|3556|3665|3811|4063|6362|7100|9450|9636|10739|10955|23521|53840|55207|79132|115004|140686|205860	CD6|HK1|HLA-DPA1|IRF8|IFI27|IL1RAP|IRF7|KIR3DL1|LY9|CCL18|TLR5|LY86|ISG15|RFPL2|SERINC3|RPL13A|TRIM34|ARL8B|DHX58|CGAS|WFDC3|TRIML2	-1.1	MyList
GO Biological Processes	19	GO:0032516	positive regulation of phosphoprotein phosphatase activity	19_GO:0048518 positive regulation of biological process	-2.3	8.5	4.5	30182	22	486	3	0.62	0.36	2768|9863|23645	GNA12|MAGI2|PPP1R15A	-1.1	MyList
GO Biological Processes	19	GO:0032785	negative regulation of DNA-templated transcription, elongation	19_GO:0048519 negative regulation of biological process	-2.3	8.5	4.5	30182	22	486	3	0.62	0.36	6469|7428|51497	SHH|VHL|NELFCD	-1.1	MyList
GO Biological Processes	19	GO:0008380	RNA splicing	19_GO:0008152 metabolic process	-2.3	2.2	3.1	30182	394	486	14	2.9	0.76	3312|8458|9967|10189|10465|11017|11129|11193|23398|23450|54845|55234|55544|58155	HSPA8|TTF2|THRAP3|ALYREF|PPIH|SNRNP27|CLASRP|WBP4|PPWD1|SF3B3|ESRP1|SMU1|RBM38|PTBP2	-1.1	MyList
GO Biological Processes	19	GO:0050867	positive regulation of cell activation	19_GO:0048518 positive regulation of biological process	-2.3	2.2	3.1	30182	394	486	14	2.9	0.76	207|916|923|1050|2812|3111|3113|3142|3572|3689|4860|6469|29851|30009	AKT1|CD3E|CD6|CEBPA|GP1BB|HLA-DOA|HLA-DPA1|HLX|IL6ST|ITGB2|PNP|SHH|ICOS|TBX21	-1.1	MyList
GO Biological Processes	19	GO:0060349	bone morphogenesis	19_GO:0032502 developmental process	-2.3	3.8	3.6	30182	98	486	6	1.2	0.5	249|3638|7020|22856|387733|642658	ALPL|INSIG1|TFAP2A|CHSY1|IFITM5|SCX	-1.1	MyList
GO Biological Processes	19	GO:0061371	determination of heart left/right asymmetry	19_GO:0032502 developmental process	-2.3	4.5	3.7	30182	69	486	5	1	0.46	4851|6469|6909|51098|51676	NOTCH1|SHH|TBX2|IFT52|ASB2	-1.1	MyList
Reactome Gene Sets	6	R-HSA-913531	Interferon Signaling		-2.3	2.8	3.3	30182	200	486	9	1.9	0.61	1974|3113|3394|3429|3665|5903|9636|23511|53840	EIF4A2|HLA-DPA1|IRF8|IFI27|IRF7|RANBP2|ISG15|NUP188|TRIM34	-1.1	MyList
GO Biological Processes	19	GO:2001243	negative regulation of intrinsic apoptotic signaling pathway	19_GO:0023052 signaling	-2.3	3.8	3.5	30182	99	486	6	1.2	0.5	207|598|637|6615|50484|219790	AKT1|BCL2L1|BID|SNAI1|RRM2B|RTKN2	-1.1	MyList
GO Biological Processes	19	GO:0030010	establishment of cell polarity	19_GO:0009987 cellular process	-2.3	3.3	3.4	30182	131	486	7	1.4	0.54	3834|4085|6469|6794|23616|143098|387755	KIF25|MAD2L1|SHH|STK11|SH3BP1|MPP7|INSC	-1.1	MyList
GO Biological Processes	19	GO:0003143	embryonic heart tube morphogenesis	19_GO:0032502 developmental process	-2.3	4.4	3.7	30182	70	486	5	1	0.46	4851|6469|6909|51098|51676	NOTCH1|SHH|TBX2|IFT52|ASB2	-1.1	MyList
GO Biological Processes	19	GO:0050792	regulation of viral process	19_GO:0016032 viral process	-2.3	3	3.3	30182	165	486	8	1.6	0.58	4851|7251|9636|10465|10739|23272|23633|53840	NOTCH1|TSG101|ISG15|PPIH|RFPL2|TASOR|KPNA6|TRIM34	-1.1	MyList
GO Biological Processes	19	GO:0072175	epithelial tube formation	19_GO:0032502 developmental process	-2.2	3.3	3.4	30182	132	486	7	1.4	0.54	2535|10522|27443|51098|79191|79192|151449	FZD2|DEAF1|CECR2|IFT52|IRX3|IRX1|GDF7	-1.1	MyList
GO Biological Processes	19	GO:0048565	digestive tract development	19_GO:0032502 developmental process	-2.2	3.3	3.4	30182	132	486	7	1.4	0.54	2304|3142|3572|4851|6469|6909|64220	FOXE1|HLX|IL6ST|NOTCH1|SHH|TBX2|STRA6	-1.1	MyList
GO Biological Processes	19	GO:0033673	negative regulation of kinase activity	19_GO:0048519 negative regulation of biological process	-2.2	2.6	3.2	30182	239	486	10	2.1	0.64	207|1050|3087|6317|6546|7251|7453|9052|9711|140775	AKT1|CEBPA|HHEX|SERPINB3|SLC8A1|TSG101|WARS1|GPRC5A|RUBCN|SMCR8	-1.1	MyList
GO Biological Processes	19	GO:0006883	cellular sodium ion homeostasis	19_GO:0042592 homeostatic process	-2.2	8.1	4.4	30182	23	486	3	0.62	0.36	496|6340|6546	ATP4B|SCNN1G|SLC8A1	-1.1	MyList
GO Biological Processes	19	GO:0071295	cellular response to vitamin	19_GO:0050896 response to stimulus	-2.2	8.1	4.4	30182	23	486	3	0.62	0.36	632|2242|54332	BGLAP|FES|GDAP1	-1.1	MyList
GO Biological Processes	19	GO:0003272	endocardial cushion formation	19_GO:0032502 developmental process	-2.2	8.1	4.4	30182	23	486	3	0.62	0.36	4851|6615|6909	NOTCH1|SNAI1|TBX2	-1.1	MyList
GO Biological Processes	19	GO:0003177	pulmonary valve development	19_GO:0032502 developmental process	-2.2	8.1	4.4	30182	23	486	3	0.62	0.36	4846|4851|64220	NOS3|NOTCH1|STRA6	-1.1	MyList
KEGG Pathway	24	hsa04022	cGMP-PKG signaling pathway		-2.2	3	3.3	30182	167	486	8	1.6	0.58	147|207|291|2768|4846|4881|6546|10672	ADRA1B|AKT1|SLC25A4|GNA12|NOS3|NPR1|SLC8A1|GNA13	-1.1	MyList
GO Biological Processes	19	GO:0072006	nephron development	19_GO:0032502 developmental process	-2.2	3.3	3.4	30182	133	486	7	1.4	0.54	4851|6469|9863|79191|79192|170690|282679	NOTCH1|SHH|MAGI2|IRX3|IRX1|ADAMTS16|AQP11	-1.1	MyList
GO Biological Processes	19	GO:0032446	protein modification by small protein conjugation	19_GO:0008152 metabolic process	-2.2	1.8	2.9	30182	756	486	22	4.5	0.94	207|3429|5903|6613|6923|7185|7251|7428|9636|9903|10739|26001|51676|53840|54551|64207|79654|84901|92305|138065|148203|205860	AKT1|IFI27|RANBP2|SUMO2|ELOB|TRAF1|TSG101|VHL|ISG15|KLHL21|RFPL2|RNF167|ASB2|TRIM34|MAGEL2|IRF2BPL|HECTD3|NFATC2IP|TMEM129|RNF183|ZNF738|TRIML2	-1.1	MyList
GO Biological Processes	19	GO:0072073	kidney epithelium development	19_GO:0032502 developmental process	-2.2	3.2	3.3	30182	134	486	7	1.4	0.54	4851|6469|9863|79191|79192|170690|282679	NOTCH1|SHH|MAGI2|IRX3|IRX1|ADAMTS16|AQP11	-1.1	MyList
GO Biological Processes	19	GO:0060411	cardiac septum morphogenesis	19_GO:0032502 developmental process	-2.2	4.3	3.6	30182	72	486	5	1	0.46	2535|4846|4851|6909|53834	FZD2|NOS3|NOTCH1|TBX2|FGFRL1	-1.1	MyList
GO Biological Processes	19	GO:0001570	vasculogenesis	19_GO:0032502 developmental process	-2.2	4.3	3.6	30182	72	486	5	1	0.46	4851|6469|7075|51162|84700	NOTCH1|SHH|TIE1|EGFL7|MYO18B	-1.1	MyList
GO Biological Processes	19	GO:0071363	cellular response to growth factor stimulus	19_GO:0050896 response to stimulus	-2.2	2	3	30182	488	486	16	3.3	0.81	207|632|2116|2324|3690|4851|5309|6909|9863|9958|27006|53834|57175|64762|151449|642658	AKT1|BGLAP|ETV2|FLT4|ITGB3|NOTCH1|PITX3|TBX2|MAGI2|USP15|FGF22|FGFRL1|CORO1B|GAREM1|GDF7|SCX	-1.1	MyList
GO Biological Processes	19	GO:0030003	cellular monoatomic cation homeostasis	19_GO:0042592 homeostatic process	-2.2	2.2	3	30182	403	486	14	2.9	0.76	496|1139|3954|6340|6546|8614|9256|27032|54499|56833|113235|151176|201140|282679	ATP4B|CHRNA7|LETM1|SCNN1G|SLC8A1|STC2|TSPOAP1|ATP2C1|TMCO1|SLAMF8|SLC46A1|ERFE|DHRS7C|AQP11	-1.1	MyList
GO Biological Processes	19	GO:0008015	blood circulation	19_GO:0032501 multicellular organismal process	-2.2	2.2	3	30182	403	486	14	2.9	0.76	147|2768|3741|4846|4881|6196|6340|6546|7349|10672|10911|27134|79924|170690	ADRA1B|GNA12|KCNA5|NOS3|NPR1|RPS6KA2|SCNN1G|SLC8A1|UCN|GNA13|UTS2|TJP3|ADM2|ADAMTS16	-1.1	MyList
GO Biological Processes	19	GO:0033559	unsaturated fatty acid metabolic process	19_GO:0008152 metabolic process	-2.2	3.7	3.4	30182	102	486	6	1.2	0.5	239|1553|8824|9536|11283|127281	ALOX12|CYP2A13|CES2|PTGES|CYP4F8|PRXL2B	-1.1	MyList
GO Biological Processes	19	GO:0022409	positive regulation of cell-cell adhesion	19_GO:0048518 positive regulation of biological process	-2.2	2.3	3	30182	321	486	12	2.5	0.7	207|916|923|3111|3113|3142|3572|3689|4860|6469|29851|51206	AKT1|CD3E|CD6|HLA-DOA|HLA-DPA1|HLX|IL6ST|ITGB2|PNP|SHH|ICOS|GP6	-1.1	MyList
GO Biological Processes	19	GO:0030517	negative regulation of axon extension	19_GO:0040007 growth	-2.2	5.4	3.8	30182	46	486	4	0.82	0.41	999|8482|10500|56920	CDH1|SEMA7A|SEMA6C|SEMA3G	-1	MyList
GO Biological Processes	19	GO:0050919	negative chemotaxis	19_GO:0040011 locomotion	-2.2	5.4	3.8	30182	46	486	4	0.82	0.41	3690|8482|10500|56920	ITGB3|SEMA7A|SEMA6C|SEMA3G	-1	MyList
GO Biological Processes	19	GO:0030195	negative regulation of blood coagulation	19_GO:0048519 negative regulation of biological process	-2.2	5.4	3.8	30182	46	486	4	0.82	0.41	239|4846|5627|114897	ALOX12|NOS3|PROS1|C1QTNF1	-1	MyList
GO Biological Processes	19	GO:0007276	gamete generation	19_GO:0022414 reproductive process	-2.2	1.8	2.8	30182	760	486	22	4.5	0.94	207|598|1912|4846|4851|5017|6196|6794|6954|8204|10522|11020|23353|55339|55818|63950|85413|89887|151195|151254|170690|221400	AKT1|BCL2L1|PHC2|NOS3|NOTCH1|OVOL1|RPS6KA2|STK11|TCP11|NRIP1|DEAF1|IFT27|SUN1|WDR33|KDM3A|DMRTA2|SLC22A16|ZNF628|CCNYL1|C2CD6|ADAMTS16|TDRD6	-1	MyList
GO Biological Processes	19	GO:0071456	cellular response to hypoxia	19_GO:0050896 response to stimulus	-2.2	3.2	3.3	30182	135	486	7	1.4	0.54	4851|6546|7428|8614|10449|51378|64506	NOTCH1|SLC8A1|VHL|STC2|ACAA2|ANGPT4|CPEB1	-1	MyList
GO Biological Processes	19	GO:0006875	cellular metal ion homeostasis	19_GO:0042592 homeostatic process	-2.2	2.3	3	30182	322	486	12	2.5	0.7	496|1139|3954|6340|6546|8614|9256|27032|54499|113235|151176|201140	ATP4B|CHRNA7|LETM1|SCNN1G|SLC8A1|STC2|TSPOAP1|ATP2C1|TMCO1|SLC46A1|ERFE|DHRS7C	-1	MyList
GO Biological Processes	19	GO:0019221	cytokine-mediated signaling pathway	19_GO:0023052 signaling	-2.2	2.2	3	30182	363	486	13	2.7	0.73	207|1050|3429|3556|3572|3665|3875|4792|4851|6362|7185|7850|9466	AKT1|CEBPA|IFI27|IL1RAP|IL6ST|IRF7|KRT18|NFKBIA|NOTCH1|CCL18|TRAF1|IL1R2|IL27RA	-1	MyList
KEGG Pathway	24	hsa01524	Platinum drug resistance		-2.2	4.3	3.6	30182	73	486	5	1	0.46	207|598|637|5429|7507	AKT1|BCL2L1|BID|POLH|XPA	-1	MyList
GO Biological Processes	19	GO:1903076	regulation of protein localization to plasma membrane	19_GO:0051179 localization	-2.2	3.6	3.4	30182	103	486	6	1.2	0.5	207|598|7430|27032|85409|131578	AKT1|BCL2L1|EZR|ATP2C1|NKD2|LRRC15	-1	MyList
GO Biological Processes	19	GO:0002360	T cell lineage commitment	19_GO:0002376 immune system process	-2.2	7.8	4.2	30182	24	486	3	0.62	0.36	4063|6469|30009	LY9|SHH|TBX21	-1	MyList
GO Biological Processes	19	GO:0021871	forebrain regionalization	19_GO:0032502 developmental process	-2.2	7.8	4.2	30182	24	486	3	0.62	0.36	6469|55079|63950	SHH|FEZF2|DMRTA2	-1	MyList
Reactome Gene Sets	6	R-HSA-210500	Glutamate Neurotransmitter Release Cycle		-2.2	7.8	4.2	30182	24	486	3	0.62	0.36	6512|9256|27165	SLC1A7|TSPOAP1|GLS2	-1	MyList
GO Biological Processes	19	GO:0009303	rRNA transcription	19_GO:0008152 metabolic process	-2.2	7.8	4.2	30182	24	486	3	0.62	0.36	9014|84172|112495	TAF1B|POLR1B|GTF3C6	-1	MyList
GO Biological Processes	19	GO:0071676	negative regulation of mononuclear cell migration	19_GO:0040011 locomotion	-2.2	7.8	4.2	30182	24	486	3	0.62	0.36	207|9466|56833	AKT1|IL27RA|SLAMF8	-1	MyList
GO Biological Processes	19	GO:1902108	regulation of mitochondrial membrane permeability involved in apoptotic process	19_GO:0051179 localization	-2.2	7.8	4.2	30182	24	486	3	0.62	0.36	637|10449|55288	BID|ACAA2|RHOT1	-1	MyList
GO Biological Processes	19	GO:0002521	leukocyte differentiation	19_GO:0032502 developmental process	-2.2	2.1	3	30182	406	486	14	2.9	0.76	916|1050|3087|3142|3394|4063|4242|6469|6794|10014|10320|30009|55716|56833	CD3E|CEBPA|HHEX|HLX|IRF8|LY9|MFNG|SHH|STK11|HDAC5|IKZF1|TBX21|LMBR1L|SLAMF8	-1	MyList
GO Biological Processes	19	GO:0090199	regulation of release of cytochrome c from mitochondria	19_GO:0023052 signaling	-2.2	5.3	3.8	30182	47	486	4	0.82	0.41	207|598|637|8739	AKT1|BCL2L1|BID|HRK	-1	MyList
Reactome Gene Sets	6	R-HSA-4570464	SUMOylation of RNA binding proteins		-2.2	5.3	3.8	30182	47	486	4	0.82	0.41	1912|5903|6613|23511	PHC2|RANBP2|SUMO2|NUP188	-1	MyList
GO Biological Processes	19	GO:1900047	negative regulation of hemostasis	19_GO:0048519 negative regulation of biological process	-2.2	5.3	3.8	30182	47	486	4	0.82	0.41	239|4846|5627|114897	ALOX12|NOS3|PROS1|C1QTNF1	-1	MyList
Reactome Gene Sets	6	R-HSA-9024446	NR1H2 and NR1H3-mediated signaling		-2.2	5.3	3.8	30182	47	486	4	0.82	0.41	1071|8204|27329|55818	CETP|NRIP1|ANGPTL3|KDM3A	-1	MyList
Reactome Gene Sets	6	R-HSA-72203	Processing of Capped Intron-Containing Pre-mRNA		-2.2	2.4	3	30182	285	486	11	2.3	0.67	3312|5903|10189|10465|11017|11193|23398|23450|23511|55234|55339	HSPA8|RANBP2|ALYREF|PPIH|SNRNP27|WBP4|PPWD1|SF3B3|NUP188|SMU1|WDR33	-1	MyList
GO Biological Processes	19	GO:0072655	establishment of protein localization to mitochondrion	19_GO:0051179 localization	-2.2	4.2	3.5	30182	74	486	5	1	0.46	207|637|3098|54332|134266	AKT1|BID|HK1|GDAP1|GRPEL2	-1	MyList
GO Biological Processes	19	GO:0003281	ventricular septum development	19_GO:0032502 developmental process	-2.2	4.2	3.5	30182	74	486	5	1	0.46	2535|4846|4851|53834|64220	FZD2|NOS3|NOTCH1|FGFRL1|STRA6	-1	MyList
GO Biological Processes	19	GO:0006913	nucleocytoplasmic transport	19_GO:0051179 localization	-2.2	2.5	3.1	30182	246	486	10	2.1	0.64	207|3087|4792|4851|5903|6469|10189|23511|23534|23633	AKT1|HHEX|NFKBIA|NOTCH1|RANBP2|SHH|ALYREF|NUP188|TNPO3|KPNA6	-1	MyList
GO Biological Processes	19	GO:0051169	nuclear transport	19_GO:0051179 localization	-2.2	2.5	3.1	30182	246	486	10	2.1	0.64	207|3087|4792|4851|5903|6469|10189|23511|23534|23633	AKT1|HHEX|NFKBIA|NOTCH1|RANBP2|SHH|ALYREF|NUP188|TNPO3|KPNA6	-1	MyList
GO Biological Processes	19	GO:0071345	cellular response to cytokine stimulus	19_GO:0050896 response to stimulus	-2.2	1.8	2.8	30182	719	486	21	4.3	0.92	207|1050|1974|3113|3394|3429|3556|3572|3665|3875|4792|4851|6362|7185|7850|9242|9466|9945|10402|23521|55818	AKT1|CEBPA|EIF4A2|HLA-DPA1|IRF8|IFI27|IL1RAP|IL6ST|IRF7|KRT18|NFKBIA|NOTCH1|CCL18|TRAF1|IL1R2|MSC|IL27RA|GFPT2|ST3GAL6|RPL13A|KDM3A	-1	MyList
GO Biological Processes	19	GO:0048754	branching morphogenesis of an epithelial tube	19_GO:0032502 developmental process	-2.2	3.2	3.3	30182	137	486	7	1.4	0.54	4851|6469|6909|7075|10672|151449|170690	NOTCH1|SHH|TBX2|TIE1|GNA13|GDF7|ADAMTS16	-1	MyList
GO Biological Processes	19	GO:0043549	regulation of kinase activity	19_GO:0008152 metabolic process	-2.2	1.8	2.8	30182	720	486	21	4.3	0.92	207|1050|2324|3087|3690|5903|6317|6546|6794|7075|7251|7349|7453|9052|9711|9770|27040|56833|140775|151195|102723555	AKT1|CEBPA|FLT4|HHEX|ITGB3|RANBP2|SERPINB3|SLC8A1|STK11|TIE1|TSG101|UCN|WARS1|GPRC5A|RUBCN|RASSF2|LAT|SLAMF8|SMCR8|CCNYL1|SPDYE16	-1	MyList
GO Biological Processes	19	GO:0010721	negative regulation of cell development	19_GO:0032502 developmental process	-2.2	2.4	3	30182	286	486	11	2.3	0.67	999|1050|3142|4851|5309|6469|8482|10500|23500|30009|56920	CDH1|CEBPA|HLX|NOTCH1|PITX3|SHH|SEMA7A|SEMA6C|DAAM2|TBX21|SEMA3G	-1	MyList
GO Biological Processes	19	GO:0045321	leukocyte activation	19_GO:0002376 immune system process	-2.2	1.9	2.9	30182	584	486	18	3.7	0.86	916|923|3087|3142|3394|3689|4063|4242|6469|6794|7374|10014|10320|22918|27040|30009|55716|56833	CD3E|CD6|HHEX|HLX|IRF8|ITGB2|LY9|MFNG|SHH|STK11|UNG|HDAC5|IKZF1|CD93|LAT|TBX21|LMBR1L|SLAMF8	-1	MyList
KEGG Pathway	24	hsa05131	Shigellosis		-2.2	2.5	3.1	30182	247	486	10	2.1	0.64	207|598|1793|3098|4792|7100|10627|27128|63916|115004	AKT1|BCL2L1|DOCK1|HK1|NFKBIA|TLR5|MYL12A|CYTH4|ELMO2|CGAS	-1	MyList
GO Biological Processes	19	GO:0071216	cellular response to biotic stimulus	19_GO:0050896 response to stimulus	-2.2	2.5	3.1	30182	247	486	10	2.1	0.64	207|923|3394|4792|4846|4851|9450|9516|23097|54499	AKT1|CD6|IRF8|NFKBIA|NOS3|NOTCH1|LY86|LITAF|CDK19|TMCO1	-1	MyList
GO Biological Processes	19	GO:0042102	positive regulation of T cell proliferation	19_GO:0002376 immune system process	-2.1	3.5	3.3	30182	105	486	6	1.2	0.5	916|923|3113|3572|4860|6469	CD3E|CD6|HLA-DPA1|IL6ST|PNP|SHH	-1	MyList
GO Biological Processes	19	GO:2000058	regulation of ubiquitin-dependent protein catabolic process	19_GO:0008152 metabolic process	-2.1	2.9	3.2	30182	173	486	8	1.6	0.58	207|1050|2768|6469|6613|6923|7428|85409	AKT1|CEBPA|GNA12|SHH|SUMO2|ELOB|VHL|NKD2	-1	MyList
KEGG Pathway	24	hsa04918	Thyroid hormone synthesis		-2.1	4.1	3.5	30182	75	486	5	1	0.46	433|5582|6528|7276|8458	ASGR2|PRKCG|SLC5A5|TTR|TTF2	-1	MyList
GO Biological Processes	19	GO:1902074	response to salt	19_GO:0050896 response to stimulus	-2.1	7.5	4.1	30182	25	486	3	0.62	0.36	249|5309|56172	ALPL|PITX3|ANKH	-1	MyList
GO Biological Processes	19	GO:0045747	positive regulation of Notch signaling pathway	19_GO:0023052 signaling	-2.1	5.2	3.7	30182	48	486	4	0.82	0.41	3572|4242|4846|4851	IL6ST|MFNG|NOS3|NOTCH1	-1	MyList
KEGG Pathway	24	hsa05162	Measles		-2.1	3.1	3.2	30182	139	486	7	1.4	0.54	207|598|637|916|3312|3665|4792	AKT1|BCL2L1|BID|CD3E|HSPA8|IRF7|NFKBIA	-1	MyList
GO Biological Processes	19	GO:0006873	cellular monoatomic ion homeostasis	19_GO:0042592 homeostatic process	-2.1	2.1	2.9	30182	412	486	14	2.9	0.76	496|1139|3954|6340|6546|8614|9256|27032|54499|56833|113235|151176|201140|282679	ATP4B|CHRNA7|LETM1|SCNN1G|SLC8A1|STC2|TSPOAP1|ATP2C1|TMCO1|SLAMF8|SLC46A1|ERFE|DHRS7C|AQP11	-1	MyList
GO Biological Processes	19	GO:0050870	positive regulation of T cell activation	19_GO:0002376 immune system process	-2.1	2.5	3	30182	249	486	10	2.1	0.64	207|916|923|3111|3113|3142|3572|4860|6469|29851	AKT1|CD3E|CD6|HLA-DOA|HLA-DPA1|HLX|IL6ST|PNP|SHH|ICOS	-1	MyList
GO Biological Processes	19	GO:0032496	response to lipopolysaccharide	19_GO:0044419 biological process involved in interspecies interaction between organisms	-2.1	2.3	2.9	30182	330	486	12	2.5	0.7	207|249|496|923|3394|4792|4846|4851|9450|9516|23097|23521	AKT1|ALPL|ATP4B|CD6|IRF8|NFKBIA|NOS3|NOTCH1|LY86|LITAF|CDK19|RPL13A	-0.99	MyList
KEGG Pathway	24	hsa05170	Human immunodeficiency virus 1 infection		-2.1	2.6	3.1	30182	212	486	9	1.9	0.61	207|598|637|916|4792|5582|6923|115004|130340	AKT1|BCL2L1|BID|CD3E|NFKBIA|PRKCG|ELOB|CGAS|AP1S3	-0.98	MyList
GO Biological Processes	19	GO:0003279	cardiac septum development	19_GO:0032502 developmental process	-2.1	3.5	3.3	30182	107	486	6	1.2	0.5	2535|4846|4851|6909|53834|64220	FZD2|NOS3|NOTCH1|TBX2|FGFRL1|STRA6	-0.98	MyList
GO Biological Processes	19	GO:0008610	lipid biosynthetic process	19_GO:0008152 metabolic process	-2.1	1.9	2.8	30182	591	486	18	3.7	0.86	239|2224|3638|3972|8760|9524|9536|10402|10449|27315|27349|55258|55301|91734|114876|127281|145567|253558	ALOX12|FDPS|INSIG1|LHB|CDS2|TECR|PTGES|ST3GAL6|ACAA2|PGAP2|MCAT|THNSL2|OLAH|IDI2|OSBPL1A|PRXL2B|TTC7B|LCLAT1	-0.98	MyList
GO Biological Processes	19	GO:0048546	digestive tract morphogenesis	19_GO:0032502 developmental process	-2.1	5.1	3.6	30182	49	486	4	0.82	0.41	3142|4851|6469|64220	HLX|NOTCH1|SHH|STRA6	-0.98	MyList
Canonical Pathways	11	M92	PID ANGIOPOIETIN RECEPTOR PATHWAY		-2.1	5.1	3.6	30182	49	486	4	0.82	0.41	207|2242|4846|51378	AKT1|FES|NOS3|ANGPT4	-0.98	MyList
GO Biological Processes	19	GO:0032434	regulation of proteasomal ubiquitin-dependent protein catabolic process	19_GO:0008152 metabolic process	-2.1	3.1	3.2	30182	141	486	7	1.4	0.54	207|1050|2768|6469|6613|6923|85409	AKT1|CEBPA|GNA12|SHH|SUMO2|ELOB|NKD2	-0.97	MyList
GO Biological Processes	19	GO:0044089	positive regulation of cellular component biogenesis	19_GO:0048518 positive regulation of biological process	-2.1	2	2.8	30182	503	486	16	3.3	0.81	577|637|2242|3556|7251|7453|8739|9378|9636|9639|23272|57787|64787|79191|143098|441381	ADGRB3|BID|FES|IL1RAP|TSG101|WARS1|HRK|NRXN1|ISG15|ARHGEF10|TASOR|MARK4|EPS8L2|IRX3|MPP7|LRRC24	-0.97	MyList
Reactome Gene Sets	6	R-HSA-1280215	Cytokine Signaling in Immune system		-2.1	1.8	2.8	30182	730	486	21	4.3	0.92	207|598|1974|3113|3312|3394|3429|3556|3572|3665|3689|4792|5903|6196|6923|7850|9466|9636|23511|53840|386653	AKT1|BCL2L1|EIF4A2|HLA-DPA1|HSPA8|IRF8|IFI27|IL1RAP|IL6ST|IRF7|ITGB2|NFKBIA|RANBP2|RPS6KA2|ELOB|IL1R2|IL27RA|ISG15|NUP188|TRIM34|IL31	-0.97	MyList
GO Biological Processes	19	GO:0032729	positive regulation of type II interferon production	19_GO:0048518 positive regulation of biological process	-2.1	4	3.4	30182	77	486	5	1	0.46	916|3113|3394|9466|9636	CD3E|HLA-DPA1|IRF8|IL27RA|ISG15	-0.97	MyList
GO Biological Processes	19	GO:0090559	regulation of membrane permeability	19_GO:0065007 biological regulation	-2.1	4	3.4	30182	77	486	5	1	0.46	291|598|637|10449|55288	SLC25A4|BCL2L1|BID|ACAA2|RHOT1	-0.97	MyList
CORUM	33	CORUM:320	55S ribosome, mitochondrial		-2.1	4	3.4	30182	77	486	5	1	0.46	23107|51373|56945|64960|114294	MRPS27|MRPS17|MRPS22|MRPS15|LACTB	-0.97	MyList
Reactome Gene Sets	6	R-HSA-194138	Signaling by VEGF		-2.1	3.5	3.3	30182	108	486	6	1.2	0.5	207|1793|2324|3690|4846|63916	AKT1|DOCK1|FLT4|ITGB3|NOS3|ELMO2	-0.97	MyList
KEGG Pathway	24	hsa04931	Insulin resistance		-2.1	3.5	3.3	30182	108	486	6	1.2	0.5	207|4792|4846|6196|9945|10724	AKT1|NFKBIA|NOS3|RPS6KA2|GFPT2|OGA	-0.97	MyList
KEGG Pathway	24	hsa03013	Nucleocytoplasmic transport		-2.1	3.5	3.3	30182	108	486	6	1.2	0.5	5903|6613|10189|23511|23534|23633	RANBP2|SUMO2|ALYREF|NUP188|TNPO3|KPNA6	-0.97	MyList
Canonical Pathways	11	M36	PID IL27 PATHWAY		-2.1	7.2	4	30182	26	486	3	0.62	0.36	3572|9466|30009	IL6ST|IL27RA|TBX21	-0.97	MyList
Canonical Pathways	11	M47	PID INTEGRIN CS PATHWAY		-2.1	7.2	4	30182	26	486	3	0.62	0.36	3689|3690|22801	ITGB2|ITGB3|ITGA11	-0.97	MyList
GO Biological Processes	19	GO:0048596	embryonic camera-type eye morphogenesis	19_GO:0032502 developmental process	-2.1	7.2	4	30182	26	486	3	0.62	0.36	6909|7020|64220	TBX2|TFAP2A|STRA6	-0.97	MyList
GO Biological Processes	19	GO:0019058	viral life cycle	19_GO:0016032 viral process	-2.1	2.8	3.1	30182	177	486	8	1.6	0.58	290|3690|6317|7251|23633|55207|90861|131578	ANPEP|ITGB3|SERPINB3|TSG101|KPNA6|ARL8B|JPT2|LRRC15	-0.97	MyList
Reactome Gene Sets	6	R-HSA-8978868	Fatty acid metabolism		-2.1	2.8	3.1	30182	177	486	8	1.6	0.58	239|9524|9536|10449|11283|27349|55301|127281	ALOX12|TECR|PTGES|ACAA2|CYP4F8|MCAT|OLAH|PRXL2B	-0.97	MyList
GO Biological Processes	19	GO:0034220	monoatomic ion transmembrane transport	19_GO:0051179 localization	-2.1	1.8	2.7	30182	778	486	22	4.5	0.94	291|496|1139|2812|3741|3743|3954|6340|6512|6528|6546|6564|7782|22821|27032|29985|54499|55515|56479|79838|89822|113235	SLC25A4|ATP4B|CHRNA7|GP1BB|KCNA5|KCNA7|LETM1|SCNN1G|SLC1A7|SLC5A5|SLC8A1|SLC15A1|SLC30A4|RASA3|ATP2C1|SLC39A3|TMCO1|ASIC4|KCNQ5|TMC5|KCNK17|SLC46A1	-0.97	MyList
GO Biological Processes	19	GO:0030336	negative regulation of cell migration	19_GO:0040011 locomotion	-2.1	2.2	2.9	30182	375	486	13	2.7	0.73	207|999|2768|4851|6469|7075|9466|9863|10014|10672|51378|56833|57175	AKT1|CDH1|GNA12|NOTCH1|SHH|TIE1|IL27RA|MAGI2|HDAC5|GNA13|ANGPT4|SLAMF8|CORO1B	-0.96	MyList
GO Biological Processes	19	GO:0036293	response to decreased oxygen levels	19_GO:0050896 response to stimulus	-2.1	2.3	2.9	30182	293	486	11	2.3	0.67	207|1139|3741|4851|6546|7428|8614|8994|10449|51378|64506	AKT1|CHRNA7|KCNA5|NOTCH1|SLC8A1|VHL|STC2|LIMD1|ACAA2|ANGPT4|CPEB1	-0.96	MyList
GO Biological Processes	19	GO:0050819	negative regulation of coagulation	19_GO:0048519 negative regulation of biological process	-2.1	5	3.6	30182	50	486	4	0.82	0.41	239|4846|5627|114897	ALOX12|NOS3|PROS1|C1QTNF1	-0.95	MyList
GO Biological Processes	19	GO:0090102	cochlea development	19_GO:0032502 developmental process	-2.1	5	3.6	30182	50	486	4	0.82	0.41	2535|6909|11020|27443	FZD2|TBX2|IFT27|CECR2	-0.95	MyList
GO Biological Processes	19	GO:0002696	positive regulation of leukocyte activation	19_GO:0002376 immune system process	-2.1	2.1	2.9	30182	377	486	13	2.7	0.73	207|916|923|1050|3111|3113|3142|3572|3689|4860|6469|29851|30009	AKT1|CD3E|CD6|CEBPA|HLA-DOA|HLA-DPA1|HLX|IL6ST|ITGB2|PNP|SHH|ICOS|TBX21	-0.95	MyList
GO Biological Processes	19	GO:0006469	negative regulation of protein kinase activity	19_GO:0048519 negative regulation of biological process	-2	2.6	3	30182	217	486	9	1.9	0.61	207|1050|3087|6317|6546|7251|7453|9052|140775	AKT1|CEBPA|HHEX|SERPINB3|SLC8A1|TSG101|WARS1|GPRC5A|SMCR8	-0.94	MyList
GO Biological Processes	19	GO:0030324	lung development	19_GO:0032502 developmental process	-2	2.8	3	30182	180	486	8	1.6	0.58	1050|2324|4846|4851|6469|6909|23521|64220	CEBPA|FLT4|NOS3|NOTCH1|SHH|TBX2|RPL13A|STRA6	-0.94	MyList
GO Biological Processes	19	GO:0001945	lymph vessel development	19_GO:0032502 developmental process	-2	6.9	3.9	30182	27	486	3	0.62	0.36	2324|3964|7075	FLT4|LGALS8|TIE1	-0.93	MyList
GO Biological Processes	19	GO:0046639	negative regulation of alpha-beta T cell differentiation	19_GO:0002376 immune system process	-2	6.9	3.9	30182	27	486	3	0.62	0.36	3142|6469|30009	HLX|SHH|TBX21	-0.93	MyList
GO Biological Processes	19	GO:0003197	endocardial cushion development	19_GO:0032502 developmental process	-2	4.9	3.5	30182	51	486	4	0.82	0.41	4846|4851|6615|6909	NOS3|NOTCH1|SNAI1|TBX2	-0.93	MyList
Reactome Gene Sets	6	R-HSA-112310	Neurotransmitter release cycle		-2	4.9	3.5	30182	51	486	4	0.82	0.41	3312|6512|9256|27165	HSPA8|SLC1A7|TSPOAP1|GLS2	-0.93	MyList
GO Biological Processes	19	GO:2000060	positive regulation of ubiquitin-dependent protein catabolic process	19_GO:0048518 positive regulation of biological process	-2	3.4	3.2	30182	111	486	6	1.2	0.5	207|1050|6613|6923|7428|85409	AKT1|CEBPA|SUMO2|ELOB|VHL|NKD2	-0.93	MyList
GO Biological Processes	19	GO:0006694	steroid biosynthetic process	19_GO:0008152 metabolic process	-2	3.4	3.2	30182	111	486	6	1.2	0.5	2224|3638|3972|10449|91734|114876	FDPS|INSIG1|LHB|ACAA2|IDI2|OSBPL1A	-0.93	MyList
GO Biological Processes	19	GO:0032543	mitochondrial translation	19_GO:0008152 metabolic process	-2	3.4	3.2	30182	111	486	6	1.2	0.5	4528|23107|51373|56945|60488|64960	MTIF2|MRPS27|MRPS17|MRPS22|MRPS35|MRPS15	-0.93	MyList
GO Biological Processes	19	GO:2001233	regulation of apoptotic signaling pathway	19_GO:0023052 signaling	-2	2.1	2.8	30182	381	486	13	2.7	0.73	207|291|598|637|4846|6615|7185|9958|10449|10955|50484|138065|219790	AKT1|SLC25A4|BCL2L1|BID|NOS3|SNAI1|TRAF1|USP15|ACAA2|SERINC3|RRM2B|RNF183|RTKN2	-0.92	MyList
GO Biological Processes	19	GO:0050767	regulation of neurogenesis	19_GO:0032502 developmental process	-2	2.1	2.8	30182	381	486	13	2.7	0.73	999|3213|3572|4851|5309|6469|6794|8482|10500|23500|55079|56920|63950	CDH1|HOXB3|IL6ST|NOTCH1|PITX3|SHH|STK11|SEMA7A|SEMA6C|DAAM2|FEZF2|SEMA3G|DMRTA2	-0.92	MyList
GO Biological Processes	19	GO:0003007	heart morphogenesis	19_GO:0032502 developmental process	-2	2.4	2.9	30182	258	486	10	2.1	0.64	2274|2535|4846|4851|6469|6615|6909|51098|51676|53834	FHL2|FZD2|NOS3|NOTCH1|SHH|SNAI1|TBX2|IFT52|ASB2|FGFRL1	-0.92	MyList
GO Biological Processes	19	GO:0014032	neural crest cell development	19_GO:0032502 developmental process	-2	3.9	3.3	30182	80	486	5	1	0.46	6469|8482|10500|55698|56920	SHH|SEMA7A|SEMA6C|RADIL|SEMA3G	-0.92	MyList
Reactome Gene Sets	6	R-HSA-416482	G alpha (12/13) signalling events		-2	3.9	3.3	30182	80	486	5	1	0.46	147|2768|9639|10672|128272	ADRA1B|GNA12|ARHGEF10|GNA13|ARHGEF19	-0.92	MyList
GO Biological Processes	19	GO:0043484	regulation of RNA splicing	19_GO:0008152 metabolic process	-2	2.7	3	30182	182	486	8	1.6	0.58	3312|9967|23450|54845|55234|55544|55578|58155	HSPA8|THRAP3|SF3B3|ESRP1|SMU1|RBM38|SUPT20H|PTBP2	-0.92	MyList
GO Biological Processes	19	GO:1905952	regulation of lipid localization	19_GO:0051179 localization	-2	2.7	3	30182	182	486	8	1.6	0.58	207|1071|3690|4792|6469|9536|114897|151176	AKT1|CETP|ITGB3|NFKBIA|SHH|PTGES|C1QTNF1|ERFE	-0.92	MyList
KEGG Pathway	24	hsa04360	Axon guidance		-2	2.7	3	30182	182	486	8	1.6	0.58	2242|6469|8482|10500|10627|56920|81029|151449	FES|SHH|SEMA7A|SEMA6C|MYL12A|SEMA3G|WNT5B|GDF7	-0.92	MyList
KEGG Pathway	24	hsa05145	Toxoplasmosis		-2	3.3	3.2	30182	112	486	6	1.2	0.5	207|598|3111|3113|3312|4792	AKT1|BCL2L1|HLA-DOA|HLA-DPA1|HSPA8|NFKBIA	-0.91	MyList
GO Biological Processes	19	GO:0009636	response to toxic substance	19_GO:0050896 response to stimulus	-2	2.5	2.9	30182	220	486	9	1.9	0.61	999|4255|4846|5582|7782|9536|64359|127281|146802	CDH1|MGMT|NOS3|PRKCG|SLC30A4|PTGES|NXN|PRXL2B|SLC47A2	-0.91	MyList
GO Biological Processes	19	GO:0006886	intracellular protein transport	19_GO:0051179 localization	-2	1.8	2.7	30182	696	486	20	4.1	0.9	207|637|3312|4792|4851|5903|6469|7251|11020|23511|23534|23633|54332|63971|64374|92305|130340|134266|282679|653082	AKT1|BID|HSPA8|NFKBIA|NOTCH1|RANBP2|SHH|TSG101|IFT27|NUP188|TNPO3|KPNA6|GDAP1|KIF13A|SIL1|TMEM129|AP1S3|GRPEL2|AQP11|ZDHHC11B	-0.91	MyList
GO Biological Processes	19	GO:0046622	positive regulation of organ growth	19_GO:0040007 growth	-2	4.8	3.5	30182	52	486	4	0.82	0.41	207|3142|4851|6909	AKT1|HLX|NOTCH1|TBX2	-0.91	MyList
GO Biological Processes	19	GO:0007173	epidermal growth factor receptor signaling pathway	19_GO:0023052 signaling	-2	4.8	3.5	30182	52	486	4	0.82	0.41	207|9770|64762|84985	AKT1|RASSF2|GAREM1|FAM83A	-0.91	MyList
GO Biological Processes	19	GO:0048871	multicellular organismal homeostasis	19_GO:0042592 homeostatic process	-2	1.9	2.7	30182	559	486	17	3.5	0.83	207|2116|4846|4851|6340|6794|9476|9770|10320|10644|27040|27134|29985|79191|90987|387715|642658	AKT1|ETV2|NOS3|NOTCH1|SCNN1G|STK11|NAPSA|RASSF2|IKZF1|IGF2BP2|LAT|TJP3|SLC39A3|IRX3|ZNF251|ARMS2|SCX	-0.91	MyList
GO Biological Processes	19	GO:0001837	epithelial to mesenchymal transition	19_GO:0032502 developmental process	-2	3.8	3.3	30182	81	486	5	1	0.46	4851|6615|23272|80320|84172	NOTCH1|SNAI1|TASOR|SP6|POLR1B	-0.9	MyList
GO Biological Processes	19	GO:0002697	regulation of immune effector process	19_GO:0002376 immune system process	-2	2.1	2.8	30182	384	486	13	2.7	0.73	2242|3098|3142|3689|5225|8482|9466|9516|30009|56833|79004|79132|115004	FES|HK1|HLX|ITGB2|PGC|SEMA7A|IL27RA|LITAF|TBX21|SLAMF8|CUEDC2|DHX58|CGAS	-0.9	MyList
Reactome Gene Sets	6	R-HSA-194315	Signaling by Rho GTPases		-17	5.5	12	30182	707	300	39	13	1.9	60|70|71|392|1627|2017|2245|3831|3895|4659|4928|5058|5594|5747|6654|6711|8476|9181|9217|9414|9590|9748|10250|10398|10627|10928|23332|23513|23580|26092|28964|51143|54443|55852|64837|80005|85440|103910|445582	ACTB|ACTC1|ACTG1|ARHGAP1|DBN1|CTTN|FGD1|KLC1|KTN1|PPP1R12A|NUP98|PAK1|MAPK1|PTK2|SOS1|SPTBN1|CDC42BPA|ARHGEF2|VAPB|TJP2|AKAP12|SLK|SRRM1|MYL9|MYL12A|RALBP1|CLASP1|SCRIB|CDC42EP4|TOR1AIP1|GIT1|DYNC1LI1|ANLN|TEX2|KLC2|DOCK5|DOCK7|MYL12B|POTEE	-14	Phosphoproteome_Stukalov_A549-ACE2_24h_Up
GO Biological Processes	19	GO:0030036	actin cytoskeleton organization	19_GO:0009987 cellular process	-17	6.5	13	30182	528	300	34	11	1.8	58|60|70|71|119|226|1627|2017|2036|2245|2317|4082|4763|5058|6711|7082|7791|8476|9181|9368|10398|10486|23022|23384|50848|54443|55604|55742|64423|65108|84687|253260|345651|440915	ACTA1|ACTB|ACTC1|ACTG1|ADD2|ALDOA|DBN1|CTTN|EPB41L1|FGD1|FLNB|MARCKS|NF1|PAK1|SPTBN1|TJP1|ZYX|CDC42BPA|ARHGEF2|NHERF1|MYL9|CAP2|PALLD|SPECC1L|F11R|ANLN|CARMIL1|PARVA|INF2|MARCKSL1|PPP1R9B|RICTOR|ACTBL2|POTEKP	-14	Phosphoproteome_Stukalov_A549-ACE2_24h_Up
Reactome Gene Sets	6	R-HSA-9716542	Signaling by Rho GTPases, Miro GTPases and RHOBTB3		-17	5.4	12	30182	723	300	39	13	1.9	60|70|71|392|1627|2017|2245|3831|3895|4659|4928|5058|5594|5747|6654|6711|8476|9181|9217|9414|9590|9748|10250|10398|10627|10928|23332|23513|23580|26092|28964|51143|54443|55852|64837|80005|85440|103910|445582	ACTB|ACTC1|ACTG1|ARHGAP1|DBN1|CTTN|FGD1|KLC1|KTN1|PPP1R12A|NUP98|PAK1|MAPK1|PTK2|SOS1|SPTBN1|CDC42BPA|ARHGEF2|VAPB|TJP2|AKAP12|SLK|SRRM1|MYL9|MYL12A|RALBP1|CLASP1|SCRIB|CDC42EP4|TOR1AIP1|GIT1|DYNC1LI1|ANLN|TEX2|KLC2|DOCK5|DOCK7|MYL12B|POTEE	-14	Phosphoproteome_Stukalov_A549-ACE2_24h_Up
GO Biological Processes	19	GO:0030029	actin filament-based process	19_GO:0009987 cellular process	-16	5.8	12	30182	589	300	34	11	1.8	58|60|70|71|119|226|1627|2017|2036|2245|2317|4082|4763|5058|6711|7082|7791|8476|9181|9368|10398|10486|23022|23384|50848|54443|55604|55742|64423|65108|84687|253260|345651|440915	ACTA1|ACTB|ACTC1|ACTG1|ADD2|ALDOA|DBN1|CTTN|EPB41L1|FGD1|FLNB|MARCKS|NF1|PAK1|SPTBN1|TJP1|ZYX|CDC42BPA|ARHGEF2|NHERF1|MYL9|CAP2|PALLD|SPECC1L|F11R|ANLN|CARMIL1|PARVA|INF2|MARCKSL1|PPP1R9B|RICTOR|ACTBL2|POTEKP	-13	Phosphoproteome_Stukalov_A549-ACE2_24h_Up
Reactome Gene Sets	6	R-HSA-9012999	RHO GTPase cycle		-13	6	11	30182	449	300	27	9	1.7	60|70|71|392|1627|2245|3895|5058|6654|6711|8476|9181|9217|9414|9590|9748|10250|10928|23513|23580|26092|28964|54443|55852|80005|85440|445582	ACTB|ACTC1|ACTG1|ARHGAP1|DBN1|FGD1|KTN1|PAK1|SOS1|SPTBN1|CDC42BPA|ARHGEF2|VAPB|TJP2|AKAP12|SLK|SRRM1|RALBP1|SCRIB|CDC42EP4|TOR1AIP1|GIT1|ANLN|TEX2|DOCK5|DOCK7|POTEE	-10	Phosphoproteome_Stukalov_A549-ACE2_24h_Up
Reactome Gene Sets	6	R-HSA-5663202	Diseases of signal transduction by growth factor receptors and second messengers		-12	6	11	30182	433	300	26	8.7	1.6	60|71|1956|3726|3831|4000|4008|4763|5594|5605|5707|5782|6194|6654|6711|7175|7249|7750|8878|9491|22872|23164|27436|51530|84335|253260	ACTB|ACTG1|EGFR|JUNB|KLC1|LMNA|LMO7|NF1|MAPK1|MAP2K2|PSMD1|PTPN12|RPS6|SOS1|SPTBN1|TPR|TSC2|ZMYM2|SQSTM1|PSMF1|SEC31A|MPRIP|EML4|ZC3HC1|AKT1S1|RICTOR	-9.8	Phosphoproteome_Stukalov_A549-ACE2_24h_Up
Reactome Gene Sets	6	R-HSA-8953854	Metabolism of RNA		-11	4.4	9.1	30182	716	300	31	10	1.8	103|3178|3187|3188|3315|4839|4848|4904|4927|4928|5707|6164|6194|6224|7175|8021|9491|9584|9972|10250|10465|11218|22985|23511|23524|51202|51729|51747|79074|79833|196513	ADAR|HNRNPA1|HNRNPH1|HNRNPH2|HSPB1|NOP2|CNOT2|YBX1|NUP88|NUP98|PSMD1|RPL34|RPS6|RPS20|TPR|NUP214|PSMF1|RBM39|NUP153|SRRM1|PPIH|DDX20|ACIN1|NUP188|SRRM2|DDX47|WBP11|LUC7L3|C2orf49|GEMIN6|DCP1B	-8.5	Phosphoproteome_Stukalov_A549-ACE2_24h_Up
KEGG Pathway	24	hsa04530	Tight junction		-11	9.5	11	30182	169	300	16	5.3	1.3	60|71|2017|3308|5599|7082|8531|9181|9368|9414|10398|10627|23513|50848|56288|103910	ACTB|ACTG1|CTTN|HSPA4|MAPK8|TJP1|YBX3|ARHGEF2|NHERF1|TJP2|MYL9|MYL12A|SCRIB|F11R|PARD3|MYL12B	-8.3	Phosphoproteome_Stukalov_A549-ACE2_24h_Up
GO Biological Processes	19	GO:0006886	intracellular protein transport	19_GO:0051179 localization	-11	4.3	8.9	30182	696	300	30	10	1.7	1314|2017|3308|3315|4000|4763|4927|4928|5195|6449|6747|7175|7249|8021|8878|8924|9181|9454|9972|22872|23511|23513|25782|54557|55737|56288|56993|63971|79083|200576	COPA|CTTN|HSPA4|HSPB1|LMNA|NF1|NUP88|NUP98|PEX14|SGTA|SSR3|TPR|TSC2|NUP214|SQSTM1|HERC2|ARHGEF2|HOMER3|NUP153|SEC31A|NUP188|SCRIB|RAB3GAP2|SGTB|VPS35|PARD3|TOMM22|KIF13A|MLPH|PIKFYVE	-8.2	Phosphoproteome_Stukalov_A549-ACE2_24h_Up
GO Biological Processes	19	GO:0033365	protein localization to organelle	19_GO:0051179 localization	-10	4.2	8.6	30182	726	300	30	10	1.7	546|1654|3308|4000|4763|4904|4927|4928|5195|6449|6747|7175|7249|8021|8729|8878|9972|23511|23513|25782|26092|54557|55690|55726|55737|56993|84687|200576|253725|283489	ATRX|DDX3X|HSPA4|LMNA|NF1|YBX1|NUP88|NUP98|PEX14|SGTA|SSR3|TPR|TSC2|NUP214|GBF1|SQSTM1|NUP153|NUP188|SCRIB|RAB3GAP2|TOR1AIP1|SGTB|PACS1|INTS13|VPS35|TOMM22|PPP1R9B|PIKFYVE|WASHC2C|CHAMP1	-7.8	Phosphoproteome_Stukalov_A549-ACE2_24h_Up
GO Biological Processes	19	GO:0010638	positive regulation of organelle organization	19_GO:0048518 positive regulation of biological process	-10	5	9	30182	506	300	25	8.3	1.6	546|1786|2017|3064|3178|4131|4216|4848|4926|5058|5594|5599|7175|10155|10928|11284|22880|23332|25782|28964|51203|55604|55737|253260|253725	ATRX|DNMT1|CTTN|HTT|HNRNPA1|MAP1B|MAP3K4|CNOT2|NUMA1|PAK1|MAPK1|MAPK8|TPR|TRIM28|RALBP1|PNKP|MORC2|CLASP1|RAB3GAP2|GIT1|NUSAP1|CARMIL1|VPS35|RICTOR|WASHC2C	-7.7	Phosphoproteome_Stukalov_A549-ACE2_24h_Up
GO Biological Processes	19	GO:0008380	RNA splicing	19_GO:0008152 metabolic process	-10	5.6	9.2	30182	394	300	22	7.3	1.5	3178|3187|4904|9169|9584|9967|10250|10465|11218|22913|22985|23091|23524|23543|51202|51574|51747|51755|55677|79074|79833|84687	HNRNPA1|HNRNPH1|YBX1|SCAF11|RBM39|THRAP3|SRRM1|PPIH|DDX20|RALY|ACIN1|ZC3H13|SRRM2|RBFOX2|DDX47|LARP7|LUC7L3|CDK12|IWS1|C2orf49|GEMIN6|PPP1R9B	-7.6	Phosphoproteome_Stukalov_A549-ACE2_24h_Up
GO Biological Processes	19	GO:0051640	organelle localization	19_GO:0051179 localization	-10	4.8	8.9	30182	519	300	25	8.3	1.6	3064|4000|4131|4134|4926|4927|4928|5195|8729|9043|9217|9368|23195|23332|23513|26115|27436|51203|56288|63971|64837|79083|85440|126353|283489	HTT|LMNA|MAP1B|MAP4|NUMA1|NUP88|NUP98|PEX14|GBF1|SPAG9|VAPB|NHERF1|MDN1|CLASP1|SCRIB|TANC2|EML4|NUSAP1|PARD3|KIF13A|KLC2|MLPH|DOCK7|MISP|CHAMP1	-7.5	Phosphoproteome_Stukalov_A549-ACE2_24h_Up
Reactome Gene Sets	6	R-HSA-9700206	Signaling by ALK in cancer		-9.8	18	13	30182	55	300	10	3.3	1	3726|3831|4008|5594|6194|7175|8878|22872|27436|51530	JUNB|KLC1|LMO7|MAPK1|RPS6|TPR|SQSTM1|SEC31A|EML4|ZC3HC1	-7.4	Phosphoproteome_Stukalov_A549-ACE2_24h_Up
Reactome Gene Sets	6	R-HSA-9725370	Signaling by ALK fusions and activated point mutants		-9.8	18	13	30182	55	300	10	3.3	1	3726|3831|4008|5594|6194|7175|8878|22872|27436|51530	JUNB|KLC1|LMO7|MAPK1|RPS6|TPR|SQSTM1|SEC31A|EML4|ZC3HC1	-7.4	Phosphoproteome_Stukalov_A549-ACE2_24h_Up
GO Biological Processes	19	GO:0007163	establishment or maintenance of cell polarity	19_GO:0009987 cellular process	-9.7	8	10	30182	201	300	16	5.3	1.3	60|3064|4000|4131|4134|4926|5747|8729|9368|10486|23332|23513|55742|56288|85440|126353	ACTB|HTT|LMNA|MAP1B|MAP4|NUMA1|PTK2|GBF1|NHERF1|CAP2|CLASP1|SCRIB|PARVA|PARD3|DOCK7|MISP	-7.3	Phosphoproteome_Stukalov_A549-ACE2_24h_Up
GO Biological Processes	19	GO:0150105	protein localization to cell-cell junction	19_GO:0051179 localization	-9.6	39	16	30182	18	300	7	2.3	0.87	60|71|7082|9414|23513|50848|51599	ACTB|ACTG1|TJP1|TJP2|SCRIB|F11R|LSR	-7.2	Phosphoproteome_Stukalov_A549-ACE2_24h_Up
Reactome Gene Sets	6	R-HSA-3108214	SUMOylation of DNA damage response and repair proteins		-9.5	14	12	30182	77	300	11	3.7	1.1	4927|4928|6612|6613|7175|8021|8924|9126|9656|9972|23511	NUP88|NUP98|SUMO3|SUMO2|TPR|NUP214|HERC2|SMC3|MDC1|NUP153|NUP188	-7.1	Phosphoproteome_Stukalov_A549-ACE2_24h_Up
GO Biological Processes	19	GO:0051656	establishment of organelle localization	19_GO:0051179 localization	-9.4	5.4	8.8	30182	388	300	21	7	1.5	3064|4000|4131|4134|4926|4927|5195|8729|9368|23195|23332|23513|26115|27436|51203|56288|63971|79083|85440|126353|283489	HTT|LMNA|MAP1B|MAP4|NUMA1|NUP88|PEX14|GBF1|NHERF1|MDN1|CLASP1|SCRIB|TANC2|EML4|NUSAP1|PARD3|KIF13A|MLPH|DOCK7|MISP|CHAMP1	-7	Phosphoproteome_Stukalov_A549-ACE2_24h_Up
GO Biological Processes	19	GO:0016071	mRNA metabolic process	19_GO:0008152 metabolic process	-9	4.2	8.1	30182	623	300	26	8.7	1.6	103|3178|3187|4848|4904|9169|9584|9967|10250|10465|11218|11273|22913|22985|23091|23248|23524|23543|51202|51574|51747|51755|55677|79066|79833|196513	ADAR|HNRNPA1|HNRNPH1|CNOT2|YBX1|SCAF11|RBM39|THRAP3|SRRM1|PPIH|DDX20|ATXN2L|RALY|ACIN1|ZC3H13|RPRD2|SRRM2|RBFOX2|DDX47|LARP7|LUC7L3|CDK12|IWS1|METTL16|GEMIN6|DCP1B	-6.6	Phosphoproteome_Stukalov_A549-ACE2_24h_Up
KEGG Pathway	24	hsa04510	Focal adhesion		-8.7	7.5	9.3	30182	201	300	15	5	1.3	60|71|1956|2317|4659|5058|5594|5599|5747|6654|7791|10398|10627|55742|103910	ACTB|ACTG1|EGFR|FLNB|PPP1R12A|PAK1|MAPK1|MAPK8|PTK2|SOS1|ZYX|MYL9|MYL12A|PARVA|MYL12B	-6.4	Phosphoproteome_Stukalov_A549-ACE2_24h_Up
Reactome Gene Sets	6	R-HSA-422475	Axon guidance		-8.7	4.4	8	30182	553	300	24	8	1.6	60|71|1956|4684|5058|5594|5599|5605|5707|5747|6164|6194|6195|6197|6224|6654|6711|9491|10398|10486|10627|23332|28964|103910	ACTB|ACTG1|EGFR|NCAM1|PAK1|MAPK1|MAPK8|MAP2K2|PSMD1|PTK2|RPL34|RPS6|RPS6KA1|RPS6KA3|RPS20|SOS1|SPTBN1|PSMF1|MYL9|CAP2|MYL12A|CLASP1|GIT1|MYL12B	-6.3	Phosphoproteome_Stukalov_A549-ACE2_24h_Up
GO Biological Processes	19	GO:0006397	mRNA processing	19_GO:0008152 metabolic process	-8.7	4.7	8.2	30182	467	300	22	7.3	1.5	103|3178|3187|4904|9169|9584|9967|10250|10465|11218|22913|22985|23091|23248|23524|23543|51202|51574|51747|51755|55677|79833	ADAR|HNRNPA1|HNRNPH1|YBX1|SCAF11|RBM39|THRAP3|SRRM1|PPIH|DDX20|RALY|ACIN1|ZC3H13|RPRD2|SRRM2|RBFOX2|DDX47|LARP7|LUC7L3|CDK12|IWS1|GEMIN6	-6.3	Phosphoproteome_Stukalov_A549-ACE2_24h_Up
Reactome Gene Sets	6	R-HSA-3108232	SUMO E3 ligases SUMOylate target proteins		-8.3	7.7	9.1	30182	182	300	14	4.7	1.2	1786|4927|4928|6294|6612|6613|7175|8021|8924|9126|9656|9972|10155|23511	DNMT1|NUP88|NUP98|SAFB|SUMO3|SUMO2|TPR|NUP214|HERC2|SMC3|MDC1|NUP153|TRIM28|NUP188	-6	Phosphoproteome_Stukalov_A549-ACE2_24h_Up
Reactome Gene Sets	6	R-HSA-9675108	Nervous system development		-8.3	4.2	7.7	30182	578	300	24	8	1.6	60|71|1956|4684|5058|5594|5599|5605|5707|5747|6164|6194|6195|6197|6224|6654|6711|9491|10398|10486|10627|23332|28964|103910	ACTB|ACTG1|EGFR|NCAM1|PAK1|MAPK1|MAPK8|MAP2K2|PSMD1|PTK2|RPL34|RPS6|RPS6KA1|RPS6KA3|RPS20|SOS1|SPTBN1|PSMF1|MYL9|CAP2|MYL12A|CLASP1|GIT1|MYL12B	-6	Phosphoproteome_Stukalov_A549-ACE2_24h_Up
Reactome Gene Sets	6	R-HSA-72203	Processing of Capped Intron-Containing Pre-mRNA		-8.3	6	8.5	30182	285	300	17	5.7	1.3	3178|3187|3188|4904|4927|4928|7175|8021|9584|9972|10250|10465|22985|23511|23524|51729|51747	HNRNPA1|HNRNPH1|HNRNPH2|YBX1|NUP88|NUP98|TPR|NUP214|RBM39|NUP153|SRRM1|PPIH|ACIN1|NUP188|SRRM2|WBP11|LUC7L3	-6	Phosphoproteome_Stukalov_A549-ACE2_24h_Up
GO Biological Processes	19	GO:1903311	regulation of mRNA metabolic process	19_GO:0008152 metabolic process	-8.2	5.5	8.2	30182	329	300	18	6	1.4	3178|4848|4904|4928|6294|8531|9584|9667|9967|10250|23367|23543|23589|26135|51574|55677|79066|196513	HNRNPA1|CNOT2|YBX1|NUP98|SAFB|YBX3|RBM39|SAFB2|THRAP3|SRRM1|LARP1|RBFOX2|CARHSP1|SERBP1|LARP7|IWS1|METTL16|DCP1B	-5.9	Phosphoproteome_Stukalov_A549-ACE2_24h_Up
Reactome Gene Sets	6	R-HSA-2990846	SUMOylation		-8.2	7.5	8.9	30182	188	300	14	4.7	1.2	1786|4927|4928|6294|6612|6613|7175|8021|8924|9126|9656|9972|10155|23511	DNMT1|NUP88|NUP98|SAFB|SUMO3|SUMO2|TPR|NUP214|HERC2|SMC3|MDC1|NUP153|TRIM28|NUP188	-5.8	Phosphoproteome_Stukalov_A549-ACE2_24h_Up
GO Biological Processes	19	GO:0090150	establishment of protein localization to membrane	19_GO:0051179 localization	-8.1	6.8	8.7	30182	223	300	15	5	1.3	1956|3308|3875|6449|6711|6747|23513|25782|26003|54557|55737|56288|56993|63971|200576	EGFR|HSPA4|KRT18|SGTA|SPTBN1|SSR3|SCRIB|RAB3GAP2|GORASP2|SGTB|VPS35|PARD3|TOMM22|KIF13A|PIKFYVE	-5.8	Phosphoproteome_Stukalov_A549-ACE2_24h_Up
GO Biological Processes	19	GO:0030010	establishment of cell polarity	19_GO:0009987 cellular process	-8.1	9.2	9.4	30182	131	300	12	4	1.1	3064|4131|4134|4926|5747|8729|9368|23332|23513|56288|85440|126353	HTT|MAP1B|MAP4|NUMA1|PTK2|GBF1|NHERF1|CLASP1|SCRIB|PARD3|DOCK7|MISP	-5.8	Phosphoproteome_Stukalov_A549-ACE2_24h_Up
Reactome Gene Sets	6	R-HSA-1640170	Cell Cycle		-8.1	3.8	7.4	30182	692	300	26	8.7	1.6	546|2029|4000|4659|4926|4927|4928|5594|5707|5883|5981|7175|8021|8924|9126|9491|9656|9972|11083|23047|23332|23511|26003|27436|51143|51720	ATRX|ENSA|LMNA|PPP1R12A|NUMA1|NUP88|NUP98|MAPK1|PSMD1|RAD9A|RFC1|TPR|NUP214|HERC2|SMC3|PSMF1|MDC1|NUP153|DIDO1|PDS5B|CLASP1|NUP188|GORASP2|EML4|DYNC1LI1|UIMC1	-5.8	Phosphoproteome_Stukalov_A549-ACE2_24h_Up
GO Biological Processes	19	GO:0044089	positive regulation of cellular component biogenesis	19_GO:0048518 positive regulation of biological process	-8.1	4.4	7.7	30182	503	300	22	7.3	1.5	1654|1786|2017|3064|4131|4848|4926|5058|5587|5599|7175|10155|22880|23332|23580|25782|28964|54443|55604|64787|253260|253725	DDX3X|DNMT1|CTTN|HTT|MAP1B|CNOT2|NUMA1|PAK1|PRKD1|MAPK8|TPR|TRIM28|MORC2|CLASP1|CDC42EP4|RAB3GAP2|GIT1|ANLN|CARMIL1|EPS8L2|RICTOR|WASHC2C	-5.8	Phosphoproteome_Stukalov_A549-ACE2_24h_Up
KEGG Pathway	24	hsa03013	Nucleocytoplasmic transport		-7.9	10	9.6	30182	108	300	11	3.7	1.1	4927|4928|6612|6613|7175|8021|9972|10250|22985|23511|387082	NUP88|NUP98|SUMO3|SUMO2|TPR|NUP214|NUP153|SRRM1|ACIN1|NUP188|SUMO4	-5.7	Phosphoproteome_Stukalov_A549-ACE2_24h_Up
KEGG Pathway	24	hsa04810	Regulation of actin cytoskeleton		-7.9	6.6	8.5	30182	229	300	15	5	1.3	60|71|1956|2245|4659|5058|5594|5605|5747|6654|10398|10627|28964|103910|200576	ACTB|ACTG1|EGFR|FGD1|PPP1R12A|PAK1|MAPK1|MAP2K2|PTK2|SOS1|MYL9|MYL12A|GIT1|MYL12B|PIKFYVE	-5.7	Phosphoproteome_Stukalov_A549-ACE2_24h_Up
GO Biological Processes	19	GO:0000278	mitotic cell cycle	19_GO:0009987 cellular process	-7.9	4	7.4	30182	610	300	24	8	1.6	2029|3064|4134|4659|4926|4927|5883|6194|6711|7175|8021|9126|9656|10270|10910|23047|23332|27436|51203|51720|54443|55726|126353|283489	ENSA|HTT|MAP4|PPP1R12A|NUMA1|NUP88|RAD9A|RPS6|SPTBN1|TPR|NUP214|SMC3|MDC1|AKAP8|SUGT1|PDS5B|CLASP1|EML4|NUSAP1|UIMC1|ANLN|INTS13|MISP|CHAMP1	-5.6	Phosphoproteome_Stukalov_A549-ACE2_24h_Up
Reactome Gene Sets	6	R-HSA-4615885	SUMOylation of DNA replication proteins		-7.9	18	11	30182	45	300	8	2.7	0.93	4927|4928|6612|6613|7175|8021|9972|23511	NUP88|NUP98|SUMO3|SUMO2|TPR|NUP214|NUP153|NUP188	-5.6	Phosphoproteome_Stukalov_A549-ACE2_24h_Up
GO Biological Processes	19	GO:0072594	establishment of protein localization to organelle	19_GO:0051179 localization	-7.8	5.2	7.9	30182	346	300	18	6	1.4	3308|4000|4763|4927|4928|5195|6449|6747|7175|7249|8021|8878|9972|23511|23513|25782|54557|56993	HSPA4|LMNA|NF1|NUP88|NUP98|PEX14|SGTA|SSR3|TPR|TSC2|NUP214|SQSTM1|NUP153|NUP188|SCRIB|RAB3GAP2|SGTB|TOMM22	-5.6	Phosphoproteome_Stukalov_A549-ACE2_24h_Up
Reactome Gene Sets	6	R-HSA-3371556	Cellular response to heat stress		-7.7	11	9.8	30182	89	300	10	3.3	1	3308|3337|4927|4928|5594|7175|8021|9972|23511|84335	HSPA4|DNAJB1|NUP88|NUP98|MAPK1|TPR|NUP214|NUP153|NUP188|AKT1S1	-5.4	Phosphoproteome_Stukalov_A549-ACE2_24h_Up
Reactome Gene Sets	6	R-HSA-3371453	Regulation of HSF1-mediated heat shock response		-7.5	13	10	30182	69	300	9	3	0.98	3308|3337|4927|4928|5594|7175|8021|9972|23511	HSPA4|DNAJB1|NUP88|NUP98|MAPK1|TPR|NUP214|NUP153|NUP188	-5.3	Phosphoproteome_Stukalov_A549-ACE2_24h_Up
Reactome Gene Sets	6	R-HSA-180910	Vpr-mediated nuclear import of PICs		-7.5	21	12	30182	33	300	7	2.3	0.87	3159|4927|4928|7175|8021|9972|23511	HMGA1|NUP88|NUP98|TPR|NUP214|NUP153|NUP188	-5.3	Phosphoproteome_Stukalov_A549-ACE2_24h_Up
KEGG Pathway	24	hsa05131	Shigellosis		-7.5	6.1	8.1	30182	247	300	15	5	1.3	60|71|1956|2017|5331|5594|5599|5747|8878|8915|9181|10398|10627|84335|103910	ACTB|ACTG1|EGFR|CTTN|PLCB3|MAPK1|MAPK8|PTK2|SQSTM1|BCL10|ARHGEF2|MYL9|MYL12A|AKT1S1|MYL12B	-5.3	Phosphoproteome_Stukalov_A549-ACE2_24h_Up
KEGG Pathway	24	hsa05014	Amyotrophic lateral sclerosis		-7.5	5	7.6	30182	364	300	18	6	1.4	60|71|3178|3831|4741|4927|4928|5707|7175|8021|8878|9217|9782|9972|11273|23511|64837|144983	ACTB|ACTG1|HNRNPA1|KLC1|NEFM|NUP88|NUP98|PSMD1|TPR|NUP214|SQSTM1|VAPB|MATR3|NUP153|ATXN2L|NUP188|KLC2|HNRNPA1L2	-5.3	Phosphoproteome_Stukalov_A549-ACE2_24h_Up
GO Biological Processes	19	GO:0051170	import into nucleus	19_GO:0051179 localization	-7.5	9.3	9.1	30182	119	300	11	3.7	1.1	3178|4000|4763|4927|4928|7175|7249|8021|8878|9972|23511	HNRNPA1|LMNA|NF1|NUP88|NUP98|TPR|TSC2|NUP214|SQSTM1|NUP153|NUP188	-5.3	Phosphoproteome_Stukalov_A549-ACE2_24h_Up
GO Biological Processes	19	GO:0051668	localization within membrane	19_GO:0051179 localization	-7.5	4.1	7.2	30182	543	300	22	7.3	1.5	1956|3308|3875|4000|6449|6711|6747|9368|23513|25782|26003|50848|54557|55667|55690|55737|56288|56993|63971|79651|200576|253725	EGFR|HSPA4|KRT18|LMNA|SGTA|SPTBN1|SSR3|NHERF1|SCRIB|RAB3GAP2|GORASP2|F11R|SGTB|DENND4C|PACS1|VPS35|PARD3|TOMM22|KIF13A|RHBDF2|PIKFYVE|WASHC2C	-5.3	Phosphoproteome_Stukalov_A549-ACE2_24h_Up
KEGG Pathway	24	hsa05132	Salmonella infection		-7.5	6.1	8	30182	249	300	15	5	1.3	60|71|2317|3831|5058|5594|5599|5605|10398|10627|51143|64837|79026|103910|113146	ACTB|ACTG1|FLNB|KLC1|PAK1|MAPK1|MAPK8|MAP2K2|MYL9|MYL12A|DYNC1LI1|KLC2|AHNAK|MYL12B|AHNAK2	-5.2	Phosphoproteome_Stukalov_A549-ACE2_24h_Up
Reactome Gene Sets	6	R-HSA-4085377	SUMOylation of SUMOylation proteins		-7.4	21	12	30182	34	300	7	2.3	0.87	4927|4928|6613|7175|8021|9972|23511	NUP88|NUP98|SUMO2|TPR|NUP214|NUP153|NUP188	-5.2	Phosphoproteome_Stukalov_A549-ACE2_24h_Up
GO Biological Processes	19	GO:0043484	regulation of RNA splicing	19_GO:0008152 metabolic process	-7.4	7.2	8.4	30182	182	300	13	4.3	1.2	3178|3187|3188|4928|9584|9967|10250|23543|51574|51755|79026|79066|113146	HNRNPA1|HNRNPH1|HNRNPH2|NUP98|RBM39|THRAP3|SRRM1|RBFOX2|LARP7|CDK12|AHNAK|METTL16|AHNAK2	-5.2	Phosphoproteome_Stukalov_A549-ACE2_24h_Up
GO Biological Processes	19	GO:0072657	protein localization to membrane	19_GO:0051179 localization	-7.4	4.4	7.3	30182	457	300	20	6.7	1.4	1956|3308|3875|6449|6711|6747|9368|23513|25782|26003|50848|54557|55667|55690|55737|56288|56993|63971|79651|200576	EGFR|HSPA4|KRT18|SGTA|SPTBN1|SSR3|NHERF1|SCRIB|RAB3GAP2|GORASP2|F11R|SGTB|DENND4C|PACS1|VPS35|PARD3|TOMM22|KIF13A|RHBDF2|PIKFYVE	-5.2	Phosphoproteome_Stukalov_A549-ACE2_24h_Up
GO Biological Processes	19	GO:0032386	regulation of intracellular transport	19_GO:0051179 localization	-7.3	5.2	7.6	30182	332	300	17	5.7	1.3	392|4131|4659|4763|4926|5587|5594|5599|5605|7175|8021|9972|10075|10155|55677|55737|57602	ARHGAP1|MAP1B|PPP1R12A|NF1|NUMA1|PRKD1|MAPK1|MAPK8|MAP2K2|TPR|NUP214|NUP153|HUWE1|TRIM28|IWS1|VPS35|USP36	-5.1	Phosphoproteome_Stukalov_A549-ACE2_24h_Up
GO Biological Processes	19	GO:0090131	mesenchyme migration	19_GO:0032502 developmental process	-7.3	80	18	30182	5	300	4	1.3	0.66	58|59|70|72	ACTA1|ACTA2|ACTC1|ACTG2	-5.1	Phosphoproteome_Stukalov_A549-ACE2_24h_Up
GO Biological Processes	19	GO:0050657	nucleic acid transport	19_GO:0051179 localization	-7.3	7.8	8.5	30182	154	300	12	4	1.1	3178|4904|4927|4928|7175|8021|8888|9961|9972|23511|55677|144983	HNRNPA1|YBX1|NUP88|NUP98|TPR|NUP214|MCM3AP|MVP|NUP153|NUP188|IWS1|HNRNPA1L2	-5.1	Phosphoproteome_Stukalov_A549-ACE2_24h_Up
GO Biological Processes	19	GO:0050658	RNA transport	19_GO:0051179 localization	-7.3	7.8	8.5	30182	154	300	12	4	1.1	3178|4904|4927|4928|7175|8021|8888|9961|9972|23511|55677|144983	HNRNPA1|YBX1|NUP88|NUP98|TPR|NUP214|MCM3AP|MVP|NUP153|NUP188|IWS1|HNRNPA1L2	-5.1	Phosphoproteome_Stukalov_A549-ACE2_24h_Up
Reactome Gene Sets	6	R-HSA-194441	Metabolism of non-coding RNA		-7.3	15	10	30182	53	300	8	2.7	0.93	4927|4928|7175|8021|9972|11218|23511|79833	NUP88|NUP98|TPR|NUP214|NUP153|DDX20|NUP188|GEMIN6	-5.1	Phosphoproteome_Stukalov_A549-ACE2_24h_Up
Reactome Gene Sets	6	R-HSA-191859	snRNP Assembly		-7.3	15	10	30182	53	300	8	2.7	0.93	4927|4928|7175|8021|9972|11218|23511|79833	NUP88|NUP98|TPR|NUP214|NUP153|DDX20|NUP188|GEMIN6	-5.1	Phosphoproteome_Stukalov_A549-ACE2_24h_Up
Reactome Gene Sets	6	R-HSA-176033	Interactions of Vpr with host cellular proteins		-7.2	20	11	30182	36	300	7	2.3	0.87	3159|4927|4928|7175|8021|9972|23511	HMGA1|NUP88|NUP98|TPR|NUP214|NUP153|NUP188	-5.1	Phosphoproteome_Stukalov_A549-ACE2_24h_Up
GO Biological Processes	19	GO:0051236	establishment of RNA localization	19_GO:0051179 localization	-7.2	7.7	8.5	30182	156	300	12	4	1.1	3178|4904|4927|4928|7175|8021|8888|9961|9972|23511|55677|144983	HNRNPA1|YBX1|NUP88|NUP98|TPR|NUP214|MCM3AP|MVP|NUP153|NUP188|IWS1|HNRNPA1L2	-5.1	Phosphoproteome_Stukalov_A549-ACE2_24h_Up
GO Biological Processes	19	GO:0051028	mRNA transport	19_GO:0051179 localization	-7.2	8.7	8.7	30182	127	300	11	3.7	1.1	3178|4927|4928|7175|8021|8888|9961|9972|23511|55677|144983	HNRNPA1|NUP88|NUP98|TPR|NUP214|MCM3AP|MVP|NUP153|NUP188|IWS1|HNRNPA1L2	-5	Phosphoproteome_Stukalov_A549-ACE2_24h_Up
GO Biological Processes	19	GO:0051493	regulation of cytoskeleton organization	19_GO:0050789 regulation of biological process	-7.2	4.1	7.1	30182	518	300	21	7	1.5	71|119|2017|4131|4926|5058|5594|5747|6522|6711|7082|7175|9181|23077|23271|23332|28964|50848|55604|253260|253725	ACTG1|ADD2|CTTN|MAP1B|NUMA1|PAK1|MAPK1|PTK2|SLC4A2|SPTBN1|TJP1|TPR|ARHGEF2|MYCBP2|CAMSAP2|CLASP1|GIT1|F11R|CARMIL1|RICTOR|WASHC2C	-5	Phosphoproteome_Stukalov_A549-ACE2_24h_Up
GO Biological Processes	19	GO:0034504	protein localization to nucleus	19_GO:0051179 localization	-7.2	6.8	8.1	30182	191	300	13	4.3	1.2	4000|4763|4927|4928|7175|7249|8021|8878|9972|23511|26092|55726|200576	LMNA|NF1|NUP88|NUP98|TPR|TSC2|NUP214|SQSTM1|NUP153|NUP188|TOR1AIP1|INTS13|PIKFYVE	-5	Phosphoproteome_Stukalov_A549-ACE2_24h_Up
Reactome Gene Sets	6	R-HSA-5627123	RHO GTPases activate PAKs		-7	25	12	30182	24	300	6	2	0.81	2017|4659|5058|10398|10627|103910	CTTN|PPP1R12A|PAK1|MYL9|MYL12A|MYL12B	-4.8	Phosphoproteome_Stukalov_A549-ACE2_24h_Up
GO Biological Processes	19	GO:0006405	RNA export from nucleus	19_GO:0051179 localization	-6.9	11	9.1	30182	82	300	9	3	0.98	3178|4927|4928|7175|8021|8888|9972|23511|55677	HNRNPA1|NUP88|NUP98|TPR|NUP214|MCM3AP|NUP153|NUP188|IWS1	-4.7	Phosphoproteome_Stukalov_A549-ACE2_24h_Up
GO Biological Processes	19	GO:0050684	regulation of mRNA processing	19_GO:0008152 metabolic process	-6.8	8	8.2	30182	139	300	11	3.7	1.1	3178|4928|6294|9584|9667|9967|10250|23543|51574|55677|79066	HNRNPA1|NUP98|SAFB|RBM39|SAFB2|THRAP3|SRRM1|RBFOX2|LARP7|IWS1|METTL16	-4.7	Phosphoproteome_Stukalov_A549-ACE2_24h_Up
KEGG Pathway	24	hsa05205	Proteoglycans in cancer		-6.8	6.4	7.7	30182	205	300	13	4.3	1.2	60|71|1956|2017|2317|4659|5058|5594|5605|5747|6194|6654|29102	ACTB|ACTG1|EGFR|CTTN|FLNB|PPP1R12A|PAK1|MAPK1|MAP2K2|PTK2|RPS6|SOS1|DROSHA	-4.7	Phosphoproteome_Stukalov_A549-ACE2_24h_Up
GO Biological Processes	19	GO:0000226	microtubule cytoskeleton organization	19_GO:0009987 cellular process	-6.8	3.9	6.8	30182	547	300	21	7	1.5	546|3064|4000|4131|4134|4659|4926|5195|6566|9126|9748|23271|23332|27436|51143|51203|55700|55726|56288|85440|126353	ATRX|HTT|LMNA|MAP1B|MAP4|PPP1R12A|NUMA1|PEX14|SLC16A1|SMC3|SLK|CAMSAP2|CLASP1|EML4|DYNC1LI1|NUSAP1|MAP7D1|INTS13|PARD3|DOCK7|MISP	-4.6	Phosphoproteome_Stukalov_A549-ACE2_24h_Up
GO Biological Processes	19	GO:2001252	positive regulation of chromosome organization	19_GO:0048518 positive regulation of biological process	-6.8	9.1	8.5	30182	111	300	10	3.3	1	546|1786|3178|4216|4926|5594|7175|10155|11284|22880	ATRX|DNMT1|HNRNPA1|MAP3K4|NUMA1|MAPK1|TPR|TRIM28|PNKP|MORC2	-4.6	Phosphoproteome_Stukalov_A549-ACE2_24h_Up
GO Biological Processes	19	GO:0031032	actomyosin structure organization	19_GO:0009987 cellular process	-6.7	9	8.5	30182	112	300	10	3.3	1	58|70|71|2036|7082|7791|8476|10398|50848|54443	ACTA1|ACTC1|ACTG1|EPB41L1|TJP1|ZYX|CDC42BPA|MYL9|F11R|ANLN	-4.6	Phosphoproteome_Stukalov_A549-ACE2_24h_Up
GO Biological Processes	19	GO:0006403	RNA localization	19_GO:0051179 localization	-6.7	6.9	7.9	30182	174	300	12	4	1.1	3178|4904|4927|4928|7175|8021|8888|9961|9972|23511|55677|144983	HNRNPA1|YBX1|NUP88|NUP98|TPR|NUP214|MCM3AP|MVP|NUP153|NUP188|IWS1|HNRNPA1L2	-4.6	Phosphoproteome_Stukalov_A549-ACE2_24h_Up
Reactome Gene Sets	6	R-HSA-68875	Mitotic Prophase		-6.7	7.8	8.1	30182	142	300	11	3.7	1.1	2029|4000|4926|4927|4928|5594|7175|8021|9972|23511|26003	ENSA|LMNA|NUMA1|NUP88|NUP98|MAPK1|TPR|NUP214|NUP153|NUP188|GORASP2	-4.6	Phosphoproteome_Stukalov_A549-ACE2_24h_Up
Reactome Gene Sets	6	R-HSA-5683057	MAPK family signaling cascades		-6.7	5	7.2	30182	325	300	16	5.3	1.3	60|71|1956|3315|3337|4684|4763|5058|5594|5605|5707|5747|6654|6711|8682|9491	ACTB|ACTG1|EGFR|HSPB1|DNAJB1|NCAM1|NF1|PAK1|MAPK1|MAP2K2|PSMD1|PTK2|SOS1|SPTBN1|PEA15|PSMF1	-4.6	Phosphoproteome_Stukalov_A549-ACE2_24h_Up
GO Biological Processes	19	GO:1902414	protein localization to cell junction	19_GO:0051179 localization	-6.7	11	8.9	30182	86	300	9	3	0.98	60|71|3315|7082|9414|23513|50848|51599|55737	ACTB|ACTG1|HSPB1|TJP1|TJP2|SCRIB|F11R|LSR|VPS35	-4.6	Phosphoproteome_Stukalov_A549-ACE2_24h_Up
GO Biological Processes	19	GO:0006913	nucleocytoplasmic transport	19_GO:0051179 localization	-6.7	5.7	7.5	30182	246	300	14	4.7	1.2	3178|4000|4763|4927|4928|7175|7249|8021|8878|8888|9972|23195|23511|55677	HNRNPA1|LMNA|NF1|NUP88|NUP98|TPR|TSC2|NUP214|SQSTM1|MCM3AP|NUP153|MDN1|NUP188|IWS1	-4.6	Phosphoproteome_Stukalov_A549-ACE2_24h_Up
GO Biological Processes	19	GO:0051169	nuclear transport	19_GO:0051179 localization	-6.7	5.7	7.5	30182	246	300	14	4.7	1.2	3178|4000|4763|4927|4928|7175|7249|8021|8878|8888|9972|23195|23511|55677	HNRNPA1|LMNA|NF1|NUP88|NUP98|TPR|TSC2|NUP214|SQSTM1|MCM3AP|NUP153|MDN1|NUP188|IWS1	-4.6	Phosphoproteome_Stukalov_A549-ACE2_24h_Up
Reactome Gene Sets	6	R-HSA-195258	RHO GTPase Effectors		-6.7	4.9	7.1	30182	327	300	16	5.3	1.3	60|71|2017|3831|3895|4659|4928|5058|5594|5747|10398|10627|23332|51143|64837|103910	ACTB|ACTG1|CTTN|KLC1|KTN1|PPP1R12A|NUP98|PAK1|MAPK1|PTK2|MYL9|MYL12A|CLASP1|DYNC1LI1|KLC2|MYL12B	-4.6	Phosphoproteome_Stukalov_A549-ACE2_24h_Up
GO Biological Processes	19	GO:0006606	protein import into nucleus	19_GO:0051179 localization	-6.7	8.8	8.4	30182	114	300	10	3.3	1	4000|4763|4927|4928|7175|7249|8021|8878|9972|23511	LMNA|NF1|NUP88|NUP98|TPR|TSC2|NUP214|SQSTM1|NUP153|NUP188	-4.6	Phosphoproteome_Stukalov_A549-ACE2_24h_Up
GO Biological Processes	19	GO:0051301	cell division	19_GO:0009987 cellular process	-6.6	4	6.7	30182	509	300	20	6.7	1.4	2029|4134|4926|6711|7175|9126|9181|23047|23332|23384|27436|51143|51203|51530|54443|55726|56288|63971|85440|126353	ENSA|MAP4|NUMA1|SPTBN1|TPR|SMC3|ARHGEF2|PDS5B|CLASP1|SPECC1L|EML4|DYNC1LI1|NUSAP1|ZC3HC1|ANLN|INTS13|PARD3|KIF13A|DOCK7|MISP	-4.5	Phosphoproteome_Stukalov_A549-ACE2_24h_Up
GO Biological Processes	19	GO:0097435	supramolecular fiber organization	19_GO:0009987 cellular process	-6.6	3.8	6.7	30182	558	300	21	7	1.5	58|70|71|119|226|1627|3178|4082|4741|4763|4926|7791|9181|9748|10398|23271|23332|55604|64423|65108|84687	ACTA1|ACTC1|ACTG1|ADD2|ALDOA|DBN1|HNRNPA1|MARCKS|NEFM|NF1|NUMA1|ZYX|ARHGEF2|SLK|MYL9|CAMSAP2|CLASP1|CARMIL1|INF2|MARCKSL1|PPP1R9B	-4.5	Phosphoproteome_Stukalov_A549-ACE2_24h_Up
GO Biological Processes	19	GO:0015931	nucleobase-containing compound transport	19_GO:0051179 localization	-6.6	6.2	7.6	30182	212	300	13	4.3	1.2	3178|4904|4927|4928|7175|8021|8888|9961|9972|23511|55677|144983|347734	HNRNPA1|YBX1|NUP88|NUP98|TPR|NUP214|MCM3AP|MVP|NUP153|NUP188|IWS1|HNRNPA1L2|SLC35B2	-4.5	Phosphoproteome_Stukalov_A549-ACE2_24h_Up
GO Biological Processes	19	GO:0032273	positive regulation of protein polymerization	19_GO:0048518 positive regulation of biological process	-6.6	10	8.7	30182	88	300	9	3	0.98	2017|4131|4926|5058|23332|28964|55604|253260|253725	CTTN|MAP1B|NUMA1|PAK1|CLASP1|GIT1|CARMIL1|RICTOR|WASHC2C	-4.5	Phosphoproteome_Stukalov_A549-ACE2_24h_Up
GO Biological Processes	19	GO:0033044	regulation of chromosome organization	19_GO:0050789 regulation of biological process	-6.6	5.6	7.4	30182	250	300	14	4.7	1.2	60|546|1786|3178|4216|4926|5594|6601|7175|10155|11284|22880|51143|196528	ACTB|ATRX|DNMT1|HNRNPA1|MAP3K4|NUMA1|MAPK1|SMARCC2|TPR|TRIM28|PNKP|MORC2|DYNC1LI1|ARID2	-4.5	Phosphoproteome_Stukalov_A549-ACE2_24h_Up
Reactome Gene Sets	6	R-HSA-68886	M Phase		-6.6	4.3	6.9	30182	418	300	18	6	1.4	2029|4000|4926|4927|4928|5594|5707|7175|8021|9126|9491|9972|23047|23332|23511|26003|27436|51143	ENSA|LMNA|NUMA1|NUP88|NUP98|MAPK1|PSMD1|TPR|NUP214|SMC3|PSMF1|NUP153|PDS5B|CLASP1|NUP188|GORASP2|EML4|DYNC1LI1	-4.5	Phosphoproteome_Stukalov_A549-ACE2_24h_Up
GO Biological Processes	19	GO:1903047	mitotic cell cycle process	19_GO:0009987 cellular process	-6.5	3.9	6.6	30182	517	300	20	6.7	1.4	2029|3064|4134|4926|5883|6194|6711|7175|9126|9656|10270|23047|23332|27436|51203|51720|54443|55726|126353|283489	ENSA|HTT|MAP4|NUMA1|RAD9A|RPS6|SPTBN1|TPR|SMC3|MDC1|AKAP8|PDS5B|CLASP1|EML4|NUSAP1|UIMC1|ANLN|INTS13|MISP|CHAMP1	-4.4	Phosphoproteome_Stukalov_A549-ACE2_24h_Up
Reactome Gene Sets	6	R-HSA-373760	L1CAM interactions		-6.5	8.5	8.2	30182	119	300	10	3.3	1	60|71|1956|4684|5058|5594|5605|6195|6197|6711	ACTB|ACTG1|EGFR|NCAM1|PAK1|MAPK1|MAP2K2|RPS6KA1|RPS6KA3|SPTBN1	-4.4	Phosphoproteome_Stukalov_A549-ACE2_24h_Up
GO Biological Processes	19	GO:0010821	regulation of mitochondrion organization	19_GO:0050789 regulation of biological process	-6.4	7.3	7.8	30182	151	300	11	3.7	1.1	2017|3064|4000|5599|7249|8878|10075|10928|55737|57602|64423	CTTN|HTT|LMNA|MAPK8|TSC2|SQSTM1|HUWE1|RALBP1|VPS35|USP36|INF2	-4.4	Phosphoproteome_Stukalov_A549-ACE2_24h_Up
Reactome Gene Sets	6	R-HSA-4570464	SUMOylation of RNA binding proteins		-6.4	15	9.6	30182	47	300	7	2.3	0.87	4927|4928|6613|7175|8021|9972|23511	NUP88|NUP98|SUMO2|TPR|NUP214|NUP153|NUP188	-4.3	Phosphoproteome_Stukalov_A549-ACE2_24h_Up
GO Biological Processes	19	GO:0051054	positive regulation of DNA metabolic process	19_GO:0048518 positive regulation of biological process	-6.4	5	7	30182	303	300	15	5	1.3	60|546|1956|3178|4216|5594|6601|10155|11284|25865|51720|54726|55183|58525|196528	ACTB|ATRX|EGFR|HNRNPA1|MAP3K4|MAPK1|SMARCC2|TRIM28|PNKP|PRKD2|UIMC1|OTUD4|RIF1|WIZ|ARID2	-4.3	Phosphoproteome_Stukalov_A549-ACE2_24h_Up
GO Biological Processes	19	GO:0032271	regulation of protein polymerization	19_GO:0050789 regulation of biological process	-6.3	6.3	7.4	30182	191	300	12	4	1.1	119|2017|4131|4926|5058|6711|23271|23332|28964|55604|253260|253725	ADD2|CTTN|MAP1B|NUMA1|PAK1|SPTBN1|CAMSAP2|CLASP1|GIT1|CARMIL1|RICTOR|WASHC2C	-4.2	Phosphoproteome_Stukalov_A549-ACE2_24h_Up
Reactome Gene Sets	6	R-HSA-4551638	SUMOylation of chromatin organization proteins		-6.3	11	8.7	30182	71	300	8	2.7	0.93	4927|4928|6612|6613|7175|8021|9972|23511	NUP88|NUP98|SUMO3|SUMO2|TPR|NUP214|NUP153|NUP188	-4.2	Phosphoproteome_Stukalov_A549-ACE2_24h_Up
Reactome Gene Sets	6	R-HSA-168271	Transport of Ribonucleoproteins into the Host Nucleus		-6.3	19	10	30182	31	300	6	2	0.81	4927|4928|7175|8021|9972|23511	NUP88|NUP98|TPR|NUP214|NUP153|NUP188	-4.2	Phosphoproteome_Stukalov_A549-ACE2_24h_Up
Reactome Gene Sets	6	R-HSA-5619107	Defective TPR may confer susceptibility towards thyroid papillary carcinoma (TPC)		-6.3	19	10	30182	31	300	6	2	0.81	4927|4928|7175|8021|9972|23511	NUP88|NUP98|TPR|NUP214|NUP153|NUP188	-4.2	Phosphoproteome_Stukalov_A549-ACE2_24h_Up
Reactome Gene Sets	6	R-HSA-168333	NEP/NS2 Interacts with the Cellular Export Machinery		-6.3	19	10	30182	31	300	6	2	0.81	4927|4928|7175|8021|9972|23511	NUP88|NUP98|TPR|NUP214|NUP153|NUP188	-4.2	Phosphoproteome_Stukalov_A549-ACE2_24h_Up
Reactome Gene Sets	6	R-HSA-170822	Regulation of Glucokinase by Glucokinase Regulatory Protein		-6.3	19	10	30182	31	300	6	2	0.81	4927|4928|7175|8021|9972|23511	NUP88|NUP98|TPR|NUP214|NUP153|NUP188	-4.2	Phosphoproteome_Stukalov_A549-ACE2_24h_Up
Reactome Gene Sets	6	R-HSA-162906	HIV Infection		-6.2	5.7	7.1	30182	231	300	13	4.3	1.2	2547|3159|4927|4928|5707|7175|7936|8021|9491|9972|23511|51616|55690	XRCC6|HMGA1|NUP88|NUP98|PSMD1|TPR|NELFE|NUP214|PSMF1|NUP153|NUP188|TAF9B|PACS1	-4.2	Phosphoproteome_Stukalov_A549-ACE2_24h_Up
GO Biological Processes	19	GO:0031334	positive regulation of protein-containing complex assembly	19_GO:0048518 positive regulation of biological process	-6.2	6.2	7.3	30182	195	300	12	4	1.1	1654|2017|4131|4926|5058|5587|5599|23332|28964|55604|253260|253725	DDX3X|CTTN|MAP1B|NUMA1|PAK1|PRKD1|MAPK8|CLASP1|GIT1|CARMIL1|RICTOR|WASHC2C	-4.1	Phosphoproteome_Stukalov_A549-ACE2_24h_Up
Reactome Gene Sets	6	R-HSA-881907	Gastrin-CREB signalling pathway via PKC and MAPK		-6.1	28	11	30182	18	300	5	1.7	0.74	1956|5594|6195|6197|6654	EGFR|MAPK1|RPS6KA1|RPS6KA3|SOS1	-4.1	Phosphoproteome_Stukalov_A549-ACE2_24h_Up
Reactome Gene Sets	6	R-HSA-162909	Host Interactions of HIV factors		-6.1	7.7	7.7	30182	130	300	10	3.3	1	3159|4927|4928|5707|7175|8021|9491|9972|23511|55690	HMGA1|NUP88|NUP98|PSMD1|TPR|NUP214|PSMF1|NUP153|NUP188|PACS1	-4.1	Phosphoproteome_Stukalov_A549-ACE2_24h_Up
Reactome Gene Sets	6	R-HSA-180746	Nuclear import of Rev protein		-6.1	18	10	30182	33	300	6	2	0.81	4927|4928|7175|8021|9972|23511	NUP88|NUP98|TPR|NUP214|NUP153|NUP188	-4.1	Phosphoproteome_Stukalov_A549-ACE2_24h_Up
Reactome Gene Sets	6	R-HSA-168274	Export of Viral Ribonucleoproteins from Nucleus		-6.1	18	10	30182	33	300	6	2	0.81	4927|4928|7175|8021|9972|23511	NUP88|NUP98|TPR|NUP214|NUP153|NUP188	-4.1	Phosphoproteome_Stukalov_A549-ACE2_24h_Up
Reactome Gene Sets	6	R-HSA-2980766	Nuclear Envelope Breakdown		-6.1	14	9.1	30182	52	300	7	2.3	0.87	4000|4927|4928|7175|8021|9972|23511	LMNA|NUP88|NUP98|TPR|NUP214|NUP153|NUP188	-4.1	Phosphoproteome_Stukalov_A549-ACE2_24h_Up
GO Biological Processes	19	GO:0140694	non-membrane-bounded organelle assembly	19_GO:0009987 cellular process	-6.1	4.7	6.7	30182	319	300	15	5	1.3	58|70|71|1654|4839|4926|9126|10398|11273|23195|23332|28988|54443|80005|126353	ACTA1|ACTC1|ACTG1|DDX3X|NOP2|NUMA1|SMC3|MYL9|ATXN2L|MDN1|CLASP1|DBNL|ANLN|DOCK5|MISP	-4	Phosphoproteome_Stukalov_A549-ACE2_24h_Up
GO Biological Processes	19	GO:0051168	nuclear export	19_GO:0051179 localization	-6.1	7.6	7.6	30182	132	300	10	3.3	1	3178|4927|4928|7175|8021|8888|9972|23195|23511|55677	HNRNPA1|NUP88|NUP98|TPR|NUP214|MCM3AP|NUP153|MDN1|NUP188|IWS1	-4	Phosphoproteome_Stukalov_A549-ACE2_24h_Up
Reactome Gene Sets	6	R-HSA-9725371	Nuclear events stimulated by ALK signaling in cancer		-6	26	11	30182	19	300	5	1.7	0.74	3726|5594|6194|27436|51530	JUNB|MAPK1|RPS6|EML4|ZC3HC1	-4	Phosphoproteome_Stukalov_A549-ACE2_24h_Up
Reactome Gene Sets	6	R-HSA-165054	Rev-mediated nuclear export of HIV RNA		-6	18	9.8	30182	34	300	6	2	0.81	4927|4928|7175|8021|9972|23511	NUP88|NUP98|TPR|NUP214|NUP153|NUP188	-4	Phosphoproteome_Stukalov_A549-ACE2_24h_Up
Reactome Gene Sets	6	R-HSA-159227	Transport of the SLBP independent Mature mRNA		-6	18	9.8	30182	34	300	6	2	0.81	4927|4928|7175|8021|9972|23511	NUP88|NUP98|TPR|NUP214|NUP153|NUP188	-4	Phosphoproteome_Stukalov_A549-ACE2_24h_Up
Reactome Gene Sets	6	R-HSA-9705683	SARS-CoV-2-host interactions		-6	5.9	7.1	30182	203	300	12	4	1.1	4927|4928|6194|6224|7082|7175|8021|9972|11218|23367|23511|79833	NUP88|NUP98|RPS6|RPS20|TJP1|TPR|NUP214|NUP153|DDX20|LARP1|NUP188|GEMIN6	-4	Phosphoproteome_Stukalov_A549-ACE2_24h_Up
Reactome Gene Sets	6	R-HSA-9679506	SARS-CoV Infections		-6	4.1	6.4	30182	414	300	17	5.7	1.3	3178|4927|4928|5926|6194|6224|6654|7082|7175|8021|9972|10465|11218|23367|23511|79685|79833	HNRNPA1|NUP88|NUP98|ARID4A|RPS6|RPS20|SOS1|TJP1|TPR|NUP214|NUP153|PPIH|DDX20|LARP1|NUP188|SAP30L|GEMIN6	-4	Phosphoproteome_Stukalov_A549-ACE2_24h_Up
Reactome Gene Sets	6	R-HSA-69278	Cell Cycle, Mitotic		-6	3.6	6.2	30182	561	300	20	6.7	1.4	2029|4000|4659|4926|4927|4928|5594|5707|5981|7175|8021|9126|9491|9972|23047|23332|23511|26003|27436|51143	ENSA|LMNA|PPP1R12A|NUMA1|NUP88|NUP98|MAPK1|PSMD1|RFC1|TPR|NUP214|SMC3|PSMF1|NUP153|PDS5B|CLASP1|NUP188|GORASP2|EML4|DYNC1LI1	-4	Phosphoproteome_Stukalov_A549-ACE2_24h_Up
Canonical Pathways	11	M164	PID ERBB1 DOWNSTREAM PATHWAY		-6	8.6	7.8	30182	105	300	9	3	0.98	1956|4086|5594|5599|5605|6194|6197|6654|253260	EGFR|SMAD1|MAPK1|MAPK8|MAP2K2|RPS6|RPS6KA3|SOS1|RICTOR	-4	Phosphoproteome_Stukalov_A549-ACE2_24h_Up
Reactome Gene Sets	6	R-HSA-3301854	Nuclear Pore Complex (NPC) Disassembly		-5.9	17	9.6	30182	35	300	6	2	0.81	4927|4928|7175|8021|9972|23511	NUP88|NUP98|TPR|NUP214|NUP153|NUP188	-3.9	Phosphoproteome_Stukalov_A549-ACE2_24h_Up
GO Biological Processes	19	GO:0035633	maintenance of blood-brain barrier	19_GO:0042592 homeostatic process	-5.9	17	9.6	30182	35	300	6	2	0.81	60|71|7082|9414|50848|51599	ACTB|ACTG1|TJP1|TJP2|F11R|LSR	-3.9	Phosphoproteome_Stukalov_A549-ACE2_24h_Up
Reactome Gene Sets	6	R-HSA-159230	Transport of the SLBP Dependant Mature mRNA		-5.9	17	9.6	30182	35	300	6	2	0.81	4927|4928|7175|8021|9972|23511	NUP88|NUP98|TPR|NUP214|NUP153|NUP188	-3.9	Phosphoproteome_Stukalov_A549-ACE2_24h_Up
Reactome Gene Sets	6	R-HSA-5627117	RHO GTPases Activate ROCKs		-5.9	25	11	30182	20	300	5	1.7	0.74	4659|5058|10398|10627|103910	PPP1R12A|PAK1|MYL9|MYL12A|MYL12B	-3.9	Phosphoproteome_Stukalov_A549-ACE2_24h_Up
CORUM	33	CORUM:1332	Large Drosha complex		-5.9	25	11	30182	20	300	5	1.7	0.74	1654|3187|9987|22913|29102	DDX3X|HNRNPH1|HNRNPDL|RALY|DROSHA	-3.9	Phosphoproteome_Stukalov_A549-ACE2_24h_Up
GO Biological Processes	19	GO:1902903	regulation of supramolecular fiber organization	19_GO:0050789 regulation of biological process	-5.9	4.3	6.4	30182	376	300	16	5.3	1.3	71|119|2017|4131|4926|5058|6711|7082|9181|23271|23332|28964|50848|55604|253260|253725	ACTG1|ADD2|CTTN|MAP1B|NUMA1|PAK1|SPTBN1|TJP1|ARHGEF2|CAMSAP2|CLASP1|GIT1|F11R|CARMIL1|RICTOR|WASHC2C	-3.9	Phosphoproteome_Stukalov_A549-ACE2_24h_Up
Reactome Gene Sets	6	R-HSA-177243	Interactions of Rev with host cellular proteins		-5.9	17	9.5	30182	36	300	6	2	0.81	4927|4928|7175|8021|9972|23511	NUP88|NUP98|TPR|NUP214|NUP153|NUP188	-3.9	Phosphoproteome_Stukalov_A549-ACE2_24h_Up
Reactome Gene Sets	6	R-HSA-2262752	Cellular responses to stress		-5.8	3.1	5.9	30182	789	300	24	8	1.6	2289|3159|3308|3337|4000|4927|4928|5594|5599|5707|6164|6194|6195|6197|6224|7175|8021|8878|9491|9972|22872|23511|51143|84335	FKBP5|HMGA1|HSPA4|DNAJB1|LMNA|NUP88|NUP98|MAPK1|MAPK8|PSMD1|RPL34|RPS6|RPS6KA1|RPS6KA3|RPS20|TPR|NUP214|SQSTM1|PSMF1|NUP153|SEC31A|NUP188|DYNC1LI1|AKT1S1	-3.8	Phosphoproteome_Stukalov_A549-ACE2_24h_Up
GO Biological Processes	19	GO:0045859	regulation of protein kinase activity	19_GO:0008152 metabolic process	-5.8	3.4	6	30182	627	300	21	7	1.5	60|103|1654|1956|2547|3064|3315|4216|4763|5058|5605|5747|6654|7249|9052|9368|9961|51755|84335|124790|151195	ACTB|ADAR|DDX3X|EGFR|XRCC6|HTT|HSPB1|MAP3K4|NF1|PAK1|MAP2K2|PTK2|SOS1|TSC2|GPRC5A|NHERF1|MVP|CDK12|AKT1S1|HEXIM2|CCNYL1	-3.8	Phosphoproteome_Stukalov_A549-ACE2_24h_Up
Reactome Gene Sets	6	R-HSA-9006934	Signaling by Receptor Tyrosine Kinases		-5.8	3.6	6.1	30182	524	300	19	6.3	1.4	60|71|1956|3178|3187|3315|3726|5058|5594|5605|5747|5782|6195|6197|6654|23543|64759|85440|253260	ACTB|ACTG1|EGFR|HNRNPA1|HNRNPH1|HSPB1|JUNB|PAK1|MAPK1|MAP2K2|PTK2|PTPN12|RPS6KA1|RPS6KA3|SOS1|RBFOX2|TNS3|DOCK7|RICTOR	-3.8	Phosphoproteome_Stukalov_A549-ACE2_24h_Up
Reactome Gene Sets	6	R-HSA-6784531	tRNA processing in the nucleus		-5.8	12	8.6	30182	57	300	7	2.3	0.87	4927|4928|7175|8021|9972|23511|79074	NUP88|NUP98|TPR|NUP214|NUP153|NUP188|C2orf49	-3.8	Phosphoproteome_Stukalov_A549-ACE2_24h_Up
CORUM	33	CORUM:351	Spliceosome		-5.8	7.1	7.3	30182	141	300	10	3.3	1	1654|5496|9584|10250|10465|22985|23524|51729|51747|51755	DDX3X|PPM1G|RBM39|SRRM1|PPIH|ACIN1|SRRM2|WBP11|LUC7L3|CDK12	-3.8	Phosphoproteome_Stukalov_A549-ACE2_24h_Up
GO Biological Processes	19	GO:0051276	chromosome organization	19_GO:0009987 cellular process	-5.8	3.8	6.2	30182	477	300	18	6	1.4	546|1654|2547|3159|4678|4928|5981|7994|9126|10270|22985|23047|23332|27436|51203|55183|126353|283489	ATRX|DDX3X|XRCC6|HMGA1|NASP|NUP98|RFC1|KAT6A|SMC3|AKAP8|ACIN1|PDS5B|CLASP1|EML4|NUSAP1|RIF1|MISP|CHAMP1	-3.8	Phosphoproteome_Stukalov_A549-ACE2_24h_Up
Reactome Gene Sets	6	R-HSA-445144	Signal transduction by L1		-5.8	24	11	30182	21	300	5	1.7	0.74	1956|4684|5058|5594|5605	EGFR|NCAM1|PAK1|MAPK1|MAP2K2	-3.8	Phosphoproteome_Stukalov_A549-ACE2_24h_Up
GO Biological Processes	19	GO:0006325	chromatin organization	19_GO:0009987 cellular process	-5.8	3.3	6	30182	633	300	21	7	1.5	60|546|1786|3159|4000|4678|5058|5926|6294|6601|7994|8888|9324|9757|10155|10514|22880|51720|55183|64710|196528	ACTB|ATRX|DNMT1|HMGA1|LMNA|NASP|PAK1|ARID4A|SAFB|SMARCC2|KAT6A|MCM3AP|HMGN3|KMT2B|TRIM28|MYBBP1A|MORC2|UIMC1|RIF1|NUCKS1|ARID2	-3.8	Phosphoproteome_Stukalov_A549-ACE2_24h_Up
Reactome Gene Sets	6	R-HSA-199991	Membrane Trafficking		-5.7	3.3	5.9	30182	634	300	21	7	1.5	60|71|1314|1956|2017|3831|5049|6711|7082|7110|7249|8729|9382|22872|22905|25782|26000|51143|55667|64837|85021	ACTB|ACTG1|COPA|EGFR|CTTN|KLC1|PAFAH1B2|SPTBN1|TJP1|TMF1|TSC2|GBF1|COG1|SEC31A|EPN2|RAB3GAP2|TBC1D10B|DYNC1LI1|DENND4C|KLC2|REPS1	-3.8	Phosphoproteome_Stukalov_A549-ACE2_24h_Up
Reactome Gene Sets	6	R-HSA-3232142	SUMOylation of ubiquitinylation proteins		-5.7	16	9.2	30182	38	300	6	2	0.81	4927|4928|7175|8021|9972|23511	NUP88|NUP98|TPR|NUP214|NUP153|NUP188	-3.8	Phosphoproteome_Stukalov_A549-ACE2_24h_Up
Reactome Gene Sets	6	R-HSA-111465	Apoptotic cleavage of cellular proteins		-5.7	16	9.2	30182	38	300	6	2	0.81	4000|5747|7082|9414|22985|28988	LMNA|PTK2|TJP1|TJP2|ACIN1|DBNL	-3.8	Phosphoproteome_Stukalov_A549-ACE2_24h_Up
GO Biological Processes	19	GO:0010639	negative regulation of organelle organization	19_GO:0048519 negative regulation of biological process	-5.7	4.4	6.4	30182	341	300	15	5	1.3	119|546|3178|4000|4131|4134|6711|7082|7175|7249|9181|10075|23271|23332|50848	ADD2|ATRX|HNRNPA1|LMNA|MAP1B|MAP4|SPTBN1|TJP1|TPR|TSC2|ARHGEF2|HUWE1|CAMSAP2|CLASP1|F11R	-3.8	Phosphoproteome_Stukalov_A549-ACE2_24h_Up
GO Biological Processes	19	GO:1901879	regulation of protein depolymerization	19_GO:0050789 regulation of biological process	-5.6	9.4	7.8	30182	86	300	8	2.7	0.93	119|4131|6711|9181|23271|23332|55604|253725	ADD2|MAP1B|SPTBN1|ARHGEF2|CAMSAP2|CLASP1|CARMIL1|WASHC2C	-3.7	Phosphoproteome_Stukalov_A549-ACE2_24h_Up
Reactome Gene Sets	6	R-HSA-162587	HIV Life Cycle		-5.6	6.8	7.1	30182	149	300	10	3.3	1	2547|3159|4927|4928|7175|7936|8021|9972|23511|51616	XRCC6|HMGA1|NUP88|NUP98|TPR|NELFE|NUP214|NUP153|NUP188|TAF9B	-3.6	Phosphoproteome_Stukalov_A549-ACE2_24h_Up
Reactome Gene Sets	6	R-HSA-168276	NS1 Mediated Effects on Host Pathways		-5.6	15	8.9	30182	40	300	6	2	0.81	4927|4928|7175|8021|9972|23511	NUP88|NUP98|TPR|NUP214|NUP153|NUP188	-3.6	Phosphoproteome_Stukalov_A549-ACE2_24h_Up
GO Biological Processes	19	GO:0006351	DNA-templated transcription	19_GO:0008152 metabolic process	-5.5	3.4	5.8	30182	599	300	20	6.7	1.4	546|1786|3159|4086|4848|5926|7994|8878|9774|9967|10623|11083|11137|22913|51087|51616|51755|79685|221830|283149	ATRX|DNMT1|HMGA1|SMAD1|CNOT2|ARID4A|KAT6A|SQSTM1|BCLAF1|THRAP3|POLR3C|DIDO1|PWP1|RALY|YBX2|TAF9B|CDK12|SAP30L|POLR1F|BCL9L	-3.6	Phosphoproteome_Stukalov_A549-ACE2_24h_Up
GO Biological Processes	19	GO:0098974	postsynaptic actin cytoskeleton organization	19_GO:0009987 cellular process	-5.5	37	12	30182	11	300	4	1.3	0.66	60|71|345651|440915	ACTB|ACTG1|ACTBL2|POTEKP	-3.6	Phosphoproteome_Stukalov_A549-ACE2_24h_Up
GO Biological Processes	19	GO:0090557	establishment of endothelial intestinal barrier	19_GO:0032502 developmental process	-5.5	37	12	30182	11	300	4	1.3	0.66	2194|7082|9414|50848	FASN|TJP1|TJP2|F11R	-3.6	Phosphoproteome_Stukalov_A549-ACE2_24h_Up
GO Biological Processes	19	GO:0097659	nucleic acid-templated transcription	19_GO:0008152 metabolic process	-5.5	3.3	5.8	30182	601	300	20	6.7	1.4	546|1786|3159|4086|4848|5926|7994|8878|9774|9967|10623|11083|11137|22913|51087|51616|51755|79685|221830|283149	ATRX|DNMT1|HMGA1|SMAD1|CNOT2|ARID4A|KAT6A|SQSTM1|BCLAF1|THRAP3|POLR3C|DIDO1|PWP1|RALY|YBX2|TAF9B|CDK12|SAP30L|POLR1F|BCL9L	-3.6	Phosphoproteome_Stukalov_A549-ACE2_24h_Up
Reactome Gene Sets	6	R-HSA-159231	Transport of Mature mRNA Derived from an Intronless Transcript		-5.5	15	8.8	30182	41	300	6	2	0.81	4927|4928|7175|8021|9972|23511	NUP88|NUP98|TPR|NUP214|NUP153|NUP188	-3.6	Phosphoproteome_Stukalov_A549-ACE2_24h_Up
Reactome Gene Sets	6	R-HSA-159234	Transport of Mature mRNAs Derived from Intronless Transcripts		-5.4	14	8.7	30182	42	300	6	2	0.81	4927|4928|7175|8021|9972|23511	NUP88|NUP98|TPR|NUP214|NUP153|NUP188	-3.5	Phosphoproteome_Stukalov_A549-ACE2_24h_Up
GO Biological Processes	19	GO:0040017	positive regulation of locomotion	19_GO:0040011 locomotion	-5.4	3.3	5.8	30182	609	300	20	6.7	1.4	59|71|1956|3315|5058|5587|5594|5605|5747|7082|9043|9181|9590|23332|25865|55604|55737|65125|80005|85440	ACTA2|ACTG1|EGFR|HSPB1|PAK1|PRKD1|MAPK1|MAP2K2|PTK2|TJP1|SPAG9|ARHGEF2|AKAP12|CLASP1|PRKD2|CARMIL1|VPS35|WNK1|DOCK5|DOCK7	-3.5	Phosphoproteome_Stukalov_A549-ACE2_24h_Up
Reactome Gene Sets	6	R-HSA-9013148	CDC42 GTPase cycle		-5.4	6.5	6.9	30182	155	300	10	3.3	1	392|2245|3895|5058|8476|10928|23513|23580|28964|85440	ARHGAP1|FGD1|KTN1|PAK1|CDC42BPA|RALBP1|SCRIB|CDC42EP4|GIT1|DOCK7	-3.5	Phosphoproteome_Stukalov_A549-ACE2_24h_Up
GO Biological Processes	19	GO:0043549	regulation of kinase activity	19_GO:0008152 metabolic process	-5.4	3.1	5.6	30182	720	300	22	7.3	1.5	60|103|1654|1956|2547|3064|3315|4216|4763|5058|5587|5605|5747|6654|7249|9052|9368|9961|51755|84335|124790|151195	ACTB|ADAR|DDX3X|EGFR|XRCC6|HTT|HSPB1|MAP3K4|NF1|PAK1|PRKD1|MAP2K2|PTK2|SOS1|TSC2|GPRC5A|NHERF1|MVP|CDK12|AKT1S1|HEXIM2|CCNYL1	-3.5	Phosphoproteome_Stukalov_A549-ACE2_24h_Up
CORUM	33	CORUM:6778	SCRIB-GIT1-ARHGEF7-PAK1 complex		-5.4	75	15	30182	4	300	3	1	0.57	5058|23513|28964	PAK1|SCRIB|GIT1	-3.5	Phosphoproteome_Stukalov_A549-ACE2_24h_Up
GO Biological Processes	19	GO:1902396	protein localization to bicellular tight junction	19_GO:0051179 localization	-5.4	75	15	30182	4	300	3	1	0.57	71|7082|50848	ACTG1|TJP1|F11R	-3.5	Phosphoproteome_Stukalov_A549-ACE2_24h_Up
CORUM	33	CORUM:6779	SCRIB-GIT1-ARHGEF7-PAK1 complex		-5.4	75	15	30182	4	300	3	1	0.57	5058|23513|28964	PAK1|SCRIB|GIT1	-3.5	Phosphoproteome_Stukalov_A549-ACE2_24h_Up
Reactome Gene Sets	6	R-HSA-2682334	EPH-Ephrin signaling		-5.4	8.7	7.5	30182	92	300	8	2.7	0.93	60|71|5058|5747|10398|10627|28964|103910	ACTB|ACTG1|PAK1|PTK2|MYL9|MYL12A|GIT1|MYL12B	-3.5	Phosphoproteome_Stukalov_A549-ACE2_24h_Up
GO Biological Processes	19	GO:0032774	RNA biosynthetic process	19_GO:0008152 metabolic process	-5.4	3.3	5.7	30182	612	300	20	6.7	1.4	546|1786|3159|4086|4848|5926|7994|8878|9774|9967|10623|11083|11137|22913|51087|51616|51755|79685|221830|283149	ATRX|DNMT1|HMGA1|SMAD1|CNOT2|ARID4A|KAT6A|SQSTM1|BCLAF1|THRAP3|POLR3C|DIDO1|PWP1|RALY|YBX2|TAF9B|CDK12|SAP30L|POLR1F|BCL9L	-3.5	Phosphoproteome_Stukalov_A549-ACE2_24h_Up
GO Biological Processes	19	GO:0043254	regulation of protein-containing complex assembly	19_GO:0050789 regulation of biological process	-5.4	3.9	6	30182	409	300	16	5.3	1.3	119|1654|2017|4131|4926|5058|5587|5599|6711|23271|23332|28964|55604|55737|253260|253725	ADD2|DDX3X|CTTN|MAP1B|NUMA1|PAK1|PRKD1|MAPK8|SPTBN1|CAMSAP2|CLASP1|GIT1|CARMIL1|VPS35|RICTOR|WASHC2C	-3.5	Phosphoproteome_Stukalov_A549-ACE2_24h_Up
Reactome Gene Sets	6	R-HSA-168325	Viral Messenger RNA Synthesis		-5.4	14	8.6	30182	43	300	6	2	0.81	4927|4928|7175|8021|9972|23511	NUP88|NUP98|TPR|NUP214|NUP153|NUP188	-3.5	Phosphoproteome_Stukalov_A549-ACE2_24h_Up
GO Biological Processes	19	GO:0043087	regulation of GTPase activity	19_GO:0065007 biological regulation	-5.4	4.1	6.1	30182	364	300	15	5	1.3	2245|4763|5747|6654|7249|9779|10928|23102|23513|25782|26000|50848|65125|85440|253260	FGD1|NF1|PTK2|SOS1|TSC2|TBC1D5|RALBP1|TBC1D2B|SCRIB|RAB3GAP2|TBC1D10B|F11R|WNK1|DOCK7|RICTOR	-3.5	Phosphoproteome_Stukalov_A549-ACE2_24h_Up
Reactome Gene Sets	6	R-HSA-5653656	Vesicle-mediated transport		-5.3	3.1	5.6	30182	673	300	21	7	1.5	60|71|1314|1956|2017|3831|5049|6711|7082|7110|7249|8729|9382|22872|22905|25782|26000|51143|55667|64837|85021	ACTB|ACTG1|COPA|EGFR|CTTN|KLC1|PAFAH1B2|SPTBN1|TJP1|TMF1|TSC2|GBF1|COG1|SEC31A|EPN2|RAB3GAP2|TBC1D10B|DYNC1LI1|DENND4C|KLC2|REPS1	-3.4	Phosphoproteome_Stukalov_A549-ACE2_24h_Up
Canonical Pathways	11	M295	SIG PIP3 SIGNALING IN CARDIAC MYOCTES		-5.3	11	7.8	30182	67	300	7	2.3	0.87	5058|5747|6195|6197|6654|7249|56288	PAK1|PTK2|RPS6KA1|RPS6KA3|SOS1|TSC2|PARD3	-3.4	Phosphoproteome_Stukalov_A549-ACE2_24h_Up
GO Biological Processes	19	GO:0034470	ncRNA processing	19_GO:0008152 metabolic process	-5.3	3.9	5.9	30182	416	300	16	5.3	1.3	16|103|1654|4086|4839|6194|11137|26512|29102|51202|51574|51729|55726|79066|79074|114034	AARS1|ADAR|DDX3X|SMAD1|NOP2|RPS6|PWP1|INTS6|DROSHA|DDX47|LARP7|WBP11|INTS13|METTL16|C2orf49|TOE1	-3.4	Phosphoproteome_Stukalov_A549-ACE2_24h_Up
Reactome Gene Sets	6	R-HSA-5673001	RAF/MAP kinase cascade		-5.3	4.7	6.2	30182	280	300	13	4.3	1.2	60|71|1956|4684|4763|5594|5605|5707|5747|6654|6711|8682|9491	ACTB|ACTG1|EGFR|NCAM1|NF1|MAPK1|MAP2K2|PSMD1|PTK2|SOS1|SPTBN1|PEA15|PSMF1	-3.4	Phosphoproteome_Stukalov_A549-ACE2_24h_Up
Reactome Gene Sets	6	R-HSA-445355	Smooth Muscle Contraction		-5.3	13	8.4	30182	45	300	6	2	0.81	59|72|5058|10398|10627|103910	ACTA2|ACTG2|PAK1|MYL9|MYL12A|MYL12B	-3.4	Phosphoproteome_Stukalov_A549-ACE2_24h_Up
GO Biological Processes	19	GO:0072659	protein localization to plasma membrane	19_GO:0051179 localization	-5.3	5.6	6.5	30182	199	300	11	3.7	1.1	3875|6711|9368|23513|26003|50848|55667|55690|55737|63971|79651	KRT18|SPTBN1|NHERF1|SCRIB|GORASP2|F11R|DENND4C|PACS1|VPS35|KIF13A|RHBDF2	-3.4	Phosphoproteome_Stukalov_A549-ACE2_24h_Up
GO Biological Processes	19	GO:1990778	protein localization to cell periphery	19_GO:0051179 localization	-5.2	5	6.3	30182	240	300	12	4	1.1	3875|6711|9368|23513|26003|50848|55667|55690|55737|63971|79651|84687	KRT18|SPTBN1|NHERF1|SCRIB|GORASP2|F11R|DENND4C|PACS1|VPS35|KIF13A|RHBDF2|PPP1R9B	-3.4	Phosphoproteome_Stukalov_A549-ACE2_24h_Up
Canonical Pathways	11	M186	PID PDGFRB PATHWAY		-5.2	7	6.9	30182	129	300	9	3	0.98	59|2017|5058|5594|5599|5605|6197|6654|9368	ACTA2|CTTN|PAK1|MAPK1|MAPK8|MAP2K2|RPS6KA3|SOS1|NHERF1	-3.3	Phosphoproteome_Stukalov_A549-ACE2_24h_Up
Reactome Gene Sets	6	R-HSA-5684996	MAPK1/MAPK3 signaling		-5.2	4.6	6.1	30182	286	300	13	4.3	1.2	60|71|1956|4684|4763|5594|5605|5707|5747|6654|6711|8682|9491	ACTB|ACTG1|EGFR|NCAM1|NF1|MAPK1|MAP2K2|PSMD1|PTK2|SOS1|SPTBN1|PEA15|PSMF1	-3.3	Phosphoproteome_Stukalov_A549-ACE2_24h_Up
Reactome Gene Sets	6	R-HSA-70171	Glycolysis		-5.2	9.9	7.5	30182	71	300	7	2.3	0.87	226|4927|4928|7175|8021|9972|23511	ALDOA|NUP88|NUP98|TPR|NUP214|NUP153|NUP188	-3.3	Phosphoproteome_Stukalov_A549-ACE2_24h_Up
KEGG Pathway	24	hsa04520	Adherens junction		-5.2	9.9	7.5	30182	71	300	7	2.3	0.87	60|71|1956|4008|5594|7082|56288	ACTB|ACTG1|EGFR|LMO7|MAPK1|TJP1|PARD3	-3.3	Phosphoproteome_Stukalov_A549-ACE2_24h_Up
GO Biological Processes	19	GO:2001022	positive regulation of response to DNA damage stimulus	19_GO:0048518 positive regulation of biological process	-5.1	6	6.5	30182	167	300	10	3.3	1	60|1956|5883|6601|9774|10155|11284|51720|55183|196528	ACTB|EGFR|RAD9A|SMARCC2|BCLAF1|TRIM28|PNKP|UIMC1|RIF1|ARID2	-3.3	Phosphoproteome_Stukalov_A549-ACE2_24h_Up
GO Biological Processes	19	GO:2001233	regulation of apoptotic signaling pathway	19_GO:0023052 signaling	-5.1	4	5.8	30182	381	300	15	5	1.3	1654|2017|3064|3315|4000|4763|5883|8531|8682|8915|9181|9368|9774|51530|51616	DDX3X|CTTN|HTT|HSPB1|LMNA|NF1|RAD9A|YBX3|PEA15|BCL10|ARHGEF2|NHERF1|BCLAF1|ZC3HC1|TAF9B	-3.3	Phosphoproteome_Stukalov_A549-ACE2_24h_Up
Reactome Gene Sets	6	R-HSA-1169408	ISG15 antiviral mechanism		-5.1	9.8	7.5	30182	72	300	7	2.3	0.87	2317|4927|4928|7175|8021|9972|23511	FLNB|NUP88|NUP98|TPR|NUP214|NUP153|NUP188	-3.3	Phosphoproteome_Stukalov_A549-ACE2_24h_Up
Reactome Gene Sets	6	R-HSA-72163	mRNA Splicing - Major Pathway		-5.1	5.3	6.3	30182	207	300	11	3.7	1.1	3178|3187|3188|4904|9584|10250|10465|22985|23524|51729|51747	HNRNPA1|HNRNPH1|HNRNPH2|YBX1|RBM39|SRRM1|PPIH|ACIN1|SRRM2|WBP11|LUC7L3	-3.2	Phosphoproteome_Stukalov_A549-ACE2_24h_Up
Reactome Gene Sets	6	R-HSA-9609690	HCMV Early Events		-5.1	6.7	6.7	30182	135	300	9	3	0.98	1956|4927|4928|7175|8021|9972|10155|23511|51143	EGFR|NUP88|NUP98|TPR|NUP214|NUP153|TRIM28|NUP188|DYNC1LI1	-3.2	Phosphoproteome_Stukalov_A549-ACE2_24h_Up
GO Biological Processes	19	GO:0099188	postsynaptic cytoskeleton organization	19_GO:0009987 cellular process	-5.1	29	10	30182	14	300	4	1.3	0.66	60|71|345651|440915	ACTB|ACTG1|ACTBL2|POTEKP	-3.2	Phosphoproteome_Stukalov_A549-ACE2_24h_Up
GO Biological Processes	19	GO:0051129	negative regulation of cellular component organization	19_GO:0048519 negative regulation of biological process	-5.1	3	5.4	30182	703	300	21	7	1.5	119|546|1654|3178|3337|4000|4131|4134|5587|6711|7082|7175|7249|9181|10075|23271|23332|50848|55604|55737|253725	ADD2|ATRX|DDX3X|HNRNPA1|DNAJB1|LMNA|MAP1B|MAP4|PRKD1|SPTBN1|TJP1|TPR|TSC2|ARHGEF2|HUWE1|CAMSAP2|CLASP1|F11R|CARMIL1|VPS35|WASHC2C	-3.2	Phosphoproteome_Stukalov_A549-ACE2_24h_Up
GO Biological Processes	19	GO:2000147	positive regulation of cell motility	19_GO:0040011 locomotion	-5	3.2	5.5	30182	594	300	19	6.3	1.4	59|71|1956|3315|5058|5587|5594|5605|5747|7082|9043|9181|9590|23332|25865|55604|65125|80005|85440	ACTA2|ACTG1|EGFR|HSPB1|PAK1|PRKD1|MAPK1|MAP2K2|PTK2|TJP1|SPAG9|ARHGEF2|AKAP12|CLASP1|PRKD2|CARMIL1|WNK1|DOCK5|DOCK7	-3.2	Phosphoproteome_Stukalov_A549-ACE2_24h_Up
Reactome Gene Sets	6	R-HSA-168273	Influenza Viral RNA Transcription and Replication		-5	6.7	6.6	30182	136	300	9	3	0.98	4927|4928|6164|6194|6224|7175|8021|9972|23511	NUP88|NUP98|RPL34|RPS6|RPS20|TPR|NUP214|NUP153|NUP188	-3.2	Phosphoproteome_Stukalov_A549-ACE2_24h_Up
GO Biological Processes	19	GO:0007015	actin filament organization	19_GO:0009987 cellular process	-5	4.8	6.1	30182	252	300	12	4	1.1	58|70|119|226|1627|4082|7791|9181|55604|64423|65108|84687	ACTA1|ACTC1|ADD2|ALDOA|DBN1|MARCKS|ZYX|ARHGEF2|CARMIL1|INF2|MARCKSL1|PPP1R9B	-3.2	Phosphoproteome_Stukalov_A549-ACE2_24h_Up
GO Biological Processes	19	GO:0051052	regulation of DNA metabolic process	19_GO:0008152 metabolic process	-5	3.3	5.5	30182	541	300	18	6	1.4	60|546|1602|1956|3178|4216|5594|6601|9126|10155|11284|25865|51720|54726|55183|58525|64710|196528	ACTB|ATRX|DACH1|EGFR|HNRNPA1|MAP3K4|MAPK1|SMARCC2|SMC3|TRIM28|PNKP|PRKD2|UIMC1|OTUD4|RIF1|WIZ|NUCKS1|ARID2	-3.2	Phosphoproteome_Stukalov_A549-ACE2_24h_Up
GO Biological Processes	19	GO:0038033	positive regulation of endothelial cell chemotaxis by VEGF-activated vascular endothelial growth factor receptor signaling pathway	19_GO:0040011 locomotion	-5	60	13	30182	5	300	3	1	0.57	3315|5587|25865	HSPB1|PRKD1|PRKD2	-3.2	Phosphoproteome_Stukalov_A549-ACE2_24h_Up
GO Biological Processes	19	GO:0071896	protein localization to adherens junction	19_GO:0051179 localization	-5	60	13	30182	5	300	3	1	0.57	60|7082|23513	ACTB|TJP1|SCRIB	-3.2	Phosphoproteome_Stukalov_A549-ACE2_24h_Up
Reactome Gene Sets	6	R-HSA-159236	Transport of Mature mRNA derived from an Intron-Containing Transcript		-5	9.4	7.3	30182	75	300	7	2.3	0.87	4927|4928|7175|8021|9972|10250|23511	NUP88|NUP98|TPR|NUP214|NUP153|SRRM1|NUP188	-3.2	Phosphoproteome_Stukalov_A549-ACE2_24h_Up
GO Biological Processes	19	GO:0061951	establishment of protein localization to plasma membrane	19_GO:0051179 localization	-5	12	7.9	30182	50	300	6	2	0.81	3875|6711|23513|26003|55737|63971	KRT18|SPTBN1|SCRIB|GORASP2|VPS35|KIF13A	-3.2	Phosphoproteome_Stukalov_A549-ACE2_24h_Up
GO Biological Processes	19	GO:0051056	regulation of small GTPase mediated signal transduction	19_GO:0023052 signaling	-5	4.4	5.9	30182	298	300	13	4.3	1.2	392|2245|4763|6654|7249|8729|8878|9181|10928|28964|50848|55667|64787	ARHGAP1|FGD1|NF1|SOS1|TSC2|GBF1|SQSTM1|ARHGEF2|RALBP1|GIT1|F11R|DENND4C|EPS8L2	-3.2	Phosphoproteome_Stukalov_A549-ACE2_24h_Up
KEGG Pathway	24	hsa05418	Fluid shear stress and atherosclerosis		-5	6.5	6.5	30182	139	300	9	3	0.98	60|71|5599|5747|6612|6613|8878|9181|387082	ACTB|ACTG1|MAPK8|PTK2|SUMO3|SUMO2|SQSTM1|ARHGEF2|SUMO4	-3.1	Phosphoproteome_Stukalov_A549-ACE2_24h_Up
Reactome Gene Sets	6	R-HSA-72172	mRNA Splicing		-4.9	5.1	6.1	30182	215	300	11	3.7	1.1	3178|3187|3188|4904|9584|10250|10465|22985|23524|51729|51747	HNRNPA1|HNRNPH1|HNRNPH2|YBX1|RBM39|SRRM1|PPIH|ACIN1|SRRM2|WBP11|LUC7L3	-3.1	Phosphoproteome_Stukalov_A549-ACE2_24h_Up
GO Biological Processes	19	GO:0010256	endomembrane system organization	19_GO:0009987 cellular process	-4.9	3.3	5.4	30182	549	300	18	6	1.4	3064|4000|5587|6449|6711|7110|8729|8878|9217|9368|9382|22872|23332|26003|26092|55361|79065|162427	HTT|LMNA|PRKD1|SGTA|SPTBN1|TMF1|GBF1|SQSTM1|VAPB|NHERF1|COG1|SEC31A|CLASP1|GORASP2|TOR1AIP1|PI4K2A|ATG9A|RETREG3	-3.1	Phosphoproteome_Stukalov_A549-ACE2_24h_Up
GO Biological Processes	19	GO:0120263	positive regulation of heterochromatin organization	19_GO:0048518 positive regulation of biological process	-4.9	27	10	30182	15	300	4	1.3	0.66	1786|7175|10155|22880	DNMT1|TPR|TRIM28|MORC2	-3.1	Phosphoproteome_Stukalov_A549-ACE2_24h_Up
GO Biological Processes	19	GO:0031453	positive regulation of heterochromatin formation	19_GO:0048519 negative regulation of biological process	-4.9	27	10	30182	15	300	4	1.3	0.66	1786|7175|10155|22880	DNMT1|TPR|TRIM28|MORC2	-3.1	Phosphoproteome_Stukalov_A549-ACE2_24h_Up
GO Biological Processes	19	GO:0046822	regulation of nucleocytoplasmic transport	19_GO:0051179 localization	-4.9	7.5	6.8	30182	107	300	8	2.7	0.93	4659|4763|5587|7175|8021|9972|10155|55677	PPP1R12A|NF1|PRKD1|TPR|NUP214|NUP153|TRIM28|IWS1	-3.1	Phosphoproteome_Stukalov_A549-ACE2_24h_Up
GO Biological Processes	19	GO:0006997	nucleus organization	19_GO:0009987 cellular process	-4.9	6.4	6.5	30182	141	300	9	3	0.98	4000|4926|4928|7110|7175|9972|26092|26135|57602	LMNA|NUMA1|NUP98|TMF1|TPR|NUP153|TOR1AIP1|SERBP1|USP36	-3.1	Phosphoproteome_Stukalov_A549-ACE2_24h_Up
Reactome Gene Sets	6	R-HSA-75153	Apoptotic execution phase		-4.9	12	7.7	30182	52	300	6	2	0.81	4000|5747|7082|9414|22985|28988	LMNA|PTK2|TJP1|TJP2|ACIN1|DBNL	-3.1	Phosphoproteome_Stukalov_A549-ACE2_24h_Up
GO Biological Processes	19	GO:0048024	regulation of mRNA splicing, via spliceosome	19_GO:0008152 metabolic process	-4.9	7.5	6.7	30182	108	300	8	2.7	0.93	3178|4928|9584|9967|10250|23543|51574|79066	HNRNPA1|NUP98|RBM39|THRAP3|SRRM1|RBFOX2|LARP7|METTL16	-3.1	Phosphoproteome_Stukalov_A549-ACE2_24h_Up
Reactome Gene Sets	6	R-HSA-109581	Apoptosis		-4.9	5.6	6.2	30182	180	300	10	3.3	1	4000|5594|5599|5707|5747|7082|9414|9491|22985|28988	LMNA|MAPK1|MAPK8|PSMD1|PTK2|TJP1|TJP2|PSMF1|ACIN1|DBNL	-3	Phosphoproteome_Stukalov_A549-ACE2_24h_Up
Canonical Pathways	11	M48	PID MET PATHWAY		-4.9	8.9	7.1	30182	79	300	7	2.3	0.87	5058|5594|5599|5605|5747|6654|84335	PAK1|MAPK1|MAPK8|MAP2K2|PTK2|SOS1|AKT1S1	-3	Phosphoproteome_Stukalov_A549-ACE2_24h_Up
Canonical Pathways	11	M108	PID NETRIN PATHWAY		-4.8	16	8.3	30182	32	300	5	1.7	0.74	4131|5058|5594|5605|5747	MAP1B|PAK1|MAPK1|MAP2K2|PTK2	-3	Phosphoproteome_Stukalov_A549-ACE2_24h_Up
GO Biological Processes	19	GO:0045070	positive regulation of viral genome replication	19_GO:0016032 viral process	-4.8	16	8.3	30182	32	300	5	1.7	0.74	103|1654|9217|10465|23367	ADAR|DDX3X|VAPB|PPIH|LARP1	-3	Phosphoproteome_Stukalov_A549-ACE2_24h_Up
GO Biological Processes	19	GO:0031116	positive regulation of microtubule polymerization	19_GO:0048518 positive regulation of biological process	-4.8	16	8.3	30182	32	300	5	1.7	0.74	4131|4926|5058|23332|28964	MAP1B|NUMA1|PAK1|CLASP1|GIT1	-3	Phosphoproteome_Stukalov_A549-ACE2_24h_Up
Reactome Gene Sets	6	R-HSA-1169410	Antiviral mechanism by IFN-stimulated genes		-4.8	8.8	7	30182	80	300	7	2.3	0.87	2317|4927|4928|7175|8021|9972|23511	FLNB|NUP88|NUP98|TPR|NUP214|NUP153|NUP188	-3	Phosphoproteome_Stukalov_A549-ACE2_24h_Up
GO Biological Processes	19	GO:1905269	positive regulation of chromatin organization	19_GO:0048518 positive regulation of biological process	-4.8	25	9.7	30182	16	300	4	1.3	0.66	1786|7175|10155|22880	DNMT1|TPR|TRIM28|MORC2	-3	Phosphoproteome_Stukalov_A549-ACE2_24h_Up
GO Biological Processes	19	GO:0031113	regulation of microtubule polymerization	19_GO:0050789 regulation of biological process	-4.8	11	7.5	30182	54	300	6	2	0.81	4131|4926|5058|23271|23332|28964	MAP1B|NUMA1|PAK1|CAMSAP2|CLASP1|GIT1	-3	Phosphoproteome_Stukalov_A549-ACE2_24h_Up
Reactome Gene Sets	6	R-HSA-8980692	RHOA GTPase cycle		-4.8	6.2	6.3	30182	147	300	9	3	0.98	70|392|3895|9181|9217|9414|9748|54443|55852	ACTC1|ARHGAP1|KTN1|ARHGEF2|VAPB|TJP2|SLK|ANLN|TEX2	-3	Phosphoproteome_Stukalov_A549-ACE2_24h_Up
Reactome Gene Sets	6	R-HSA-9013149	RAC1 GTPase cycle		-4.8	5.4	6.1	30182	185	300	10	3.3	1	392|3895|5058|6654|8476|10928|23580|28964|80005|85440	ARHGAP1|KTN1|PAK1|SOS1|CDC42BPA|RALBP1|CDC42EP4|GIT1|DOCK5|DOCK7	-3	Phosphoproteome_Stukalov_A549-ACE2_24h_Up
GO Biological Processes	19	GO:0051345	positive regulation of hydrolase activity	19_GO:0065007 biological regulation	-4.7	3.2	5.3	30182	569	300	18	6	1.4	1654|1956|4659|4763|5587|5599|6654|7249|8915|9779|10928|23102|23513|23786|25865|26000|50848|85440	DDX3X|EGFR|PPP1R12A|NF1|PRKD1|MAPK8|SOS1|TSC2|BCL10|TBC1D5|RALBP1|TBC1D2B|SCRIB|BCL2L13|PRKD2|TBC1D10B|F11R|DOCK7	-2.9	Phosphoproteome_Stukalov_A549-ACE2_24h_Up
GO Biological Processes	19	GO:0030335	positive regulation of cell migration	19_GO:0040011 locomotion	-4.7	3.2	5.3	30182	569	300	18	6	1.4	59|71|1956|3315|5058|5587|5594|5747|7082|9043|9181|9590|23332|25865|55604|65125|80005|85440	ACTA2|ACTG1|EGFR|HSPB1|PAK1|PRKD1|MAPK1|PTK2|TJP1|SPAG9|ARHGEF2|AKAP12|CLASP1|PRKD2|CARMIL1|WNK1|DOCK5|DOCK7	-2.9	Phosphoproteome_Stukalov_A549-ACE2_24h_Up
GO Biological Processes	19	GO:0007346	regulation of mitotic cell cycle	19_GO:0050789 regulation of biological process	-4.7	3.3	5.3	30182	517	300	17	5.7	1.3	60|1654|1956|5883|6601|7175|8729|9368|9656|23513|51143|51203|51720|54443|55726|84687|196528	ACTB|DDX3X|EGFR|RAD9A|SMARCC2|TPR|GBF1|NHERF1|MDC1|SCRIB|DYNC1LI1|NUSAP1|UIMC1|ANLN|INTS13|PPP1R9B|ARID2	-2.9	Phosphoproteome_Stukalov_A549-ACE2_24h_Up
GO Biological Processes	19	GO:0051293	establishment of spindle localization	19_GO:0051179 localization	-4.7	11	7.3	30182	56	300	6	2	0.81	3064|4134|4926|23332|51203|126353	HTT|MAP4|NUMA1|CLASP1|NUSAP1|MISP	-2.9	Phosphoproteome_Stukalov_A549-ACE2_24h_Up
GO Biological Processes	19	GO:0022613	ribonucleoprotein complex biogenesis	19_GO:0009987 cellular process	-4.7	3.5	5.3	30182	466	300	16	5.3	1.3	103|1654|4839|4927|6194|9169|10514|11137|11218|23195|29102|51202|51729|51747|79066|79833	ADAR|DDX3X|NOP2|NUP88|RPS6|SCAF11|MYBBP1A|PWP1|DDX20|MDN1|DROSHA|DDX47|WBP11|LUC7L3|METTL16|GEMIN6	-2.9	Phosphoproteome_Stukalov_A549-ACE2_24h_Up
GO Biological Processes	19	GO:0046777	protein autophosphorylation	19_GO:0008152 metabolic process	-4.7	5.4	6	30182	188	300	10	3.3	1	1956|5058|5587|5605|5747|9748|10155|25865|51755|200576	EGFR|PAK1|PRKD1|MAP2K2|PTK2|SLK|TRIM28|PRKD2|CDK12|PIKFYVE	-2.9	Phosphoproteome_Stukalov_A549-ACE2_24h_Up
GO Biological Processes	19	GO:0006468	protein phosphorylation	19_GO:0008152 metabolic process	-4.7	2.9	5.1	30182	686	300	20	6.7	1.4	1956|4086|5058|5587|5594|5599|5605|5747|6195|6197|6711|8476|8878|9748|10155|25865|51755|65125|200576|253260	EGFR|SMAD1|PAK1|PRKD1|MAPK1|MAPK8|MAP2K2|PTK2|RPS6KA1|RPS6KA3|SPTBN1|CDC42BPA|SQSTM1|SLK|TRIM28|PRKD2|CDK12|WNK1|PIKFYVE|RICTOR	-2.9	Phosphoproteome_Stukalov_A549-ACE2_24h_Up
Canonical Pathways	11	M84	PID ATM PATHWAY		-4.7	15	8.1	30182	34	300	5	1.7	0.74	5883|9126|9656|10155|51720	RAD9A|SMC3|MDC1|TRIM28|UIMC1	-2.9	Phosphoproteome_Stukalov_A549-ACE2_24h_Up
Reactome Gene Sets	6	R-HSA-6802957	Oncogenic MAPK signaling		-4.7	8.4	6.8	30182	84	300	7	2.3	0.87	60|71|4000|4763|5594|5605|23164	ACTB|ACTG1|LMNA|NF1|MAPK1|MAP2K2|MPRIP	-2.9	Phosphoproteome_Stukalov_A549-ACE2_24h_Up
Reactome Gene Sets	6	R-HSA-72202	Transport of Mature Transcript to Cytoplasm		-4.7	8.4	6.8	30182	84	300	7	2.3	0.87	4927|4928|7175|8021|9972|10250|23511	NUP88|NUP98|TPR|NUP214|NUP153|SRRM1|NUP188	-2.9	Phosphoproteome_Stukalov_A549-ACE2_24h_Up
KEGG Pathway	24	hsa04012	ErbB signaling pathway		-4.6	8.3	6.7	30182	85	300	7	2.3	0.87	1956|5058|5594|5599|5605|5747|6654	EGFR|PAK1|MAPK1|MAPK8|MAP2K2|PTK2|SOS1	-2.9	Phosphoproteome_Stukalov_A549-ACE2_24h_Up
Canonical Pathways	11	M127	PID ERBB1 RECEPTOR PROXIMAL PATHWAY		-4.6	14	7.9	30182	35	300	5	1.7	0.74	1956|5058|5594|5747|6654	EGFR|PAK1|MAPK1|PTK2|SOS1	-2.9	Phosphoproteome_Stukalov_A549-ACE2_24h_Up
GO Biological Processes	19	GO:0016197	endosomal transport	19_GO:0051179 localization	-4.6	4.7	5.8	30182	233	300	11	3.7	1.1	392|8729|8878|9043|9779|23513|26000|55737|85021|200576|253725	ARHGAP1|GBF1|SQSTM1|SPAG9|TBC1D5|SCRIB|TBC1D10B|VPS35|REPS1|PIKFYVE|WASHC2C	-2.9	Phosphoproteome_Stukalov_A549-ACE2_24h_Up
GO Biological Processes	19	GO:0045069	regulation of viral genome replication	19_GO:0016032 viral process	-4.6	8.2	6.7	30182	86	300	7	2.3	0.87	103|1654|9217|10155|10465|22880|23367	ADAR|DDX3X|VAPB|TRIM28|PPIH|MORC2|LARP1	-2.8	Phosphoproteome_Stukalov_A549-ACE2_24h_Up
Reactome Gene Sets	6	R-HSA-9013406	RHOQ GTPase cycle		-4.6	10	7.1	30182	59	300	6	2	0.81	392|5058|8476|23513|23580|28964	ARHGAP1|PAK1|CDC42BPA|SCRIB|CDC42EP4|GIT1	-2.8	Phosphoproteome_Stukalov_A549-ACE2_24h_Up
Canonical Pathways	11	M281	PID FAK PATHWAY		-4.6	10	7.1	30182	59	300	6	2	0.81	58|5058|5594|5599|5747|6654	ACTA1|PAK1|MAPK1|MAPK8|PTK2|SOS1	-2.8	Phosphoproteome_Stukalov_A549-ACE2_24h_Up
GO Biological Processes	19	GO:0048193	Golgi vesicle transport	19_GO:0051179 localization	-4.6	4.3	5.6	30182	280	300	12	4	1.1	1314|3064|3875|5587|6711|8729|9217|9382|10066|10067|22872|63971	COPA|HTT|KRT18|PRKD1|SPTBN1|GBF1|VAPB|COG1|SCAMP2|SCAMP3|SEC31A|KIF13A	-2.8	Phosphoproteome_Stukalov_A549-ACE2_24h_Up
GO Biological Processes	19	GO:0031112	positive regulation of microtubule polymerization or depolymerization	19_GO:0048518 positive regulation of biological process	-4.6	14	7.8	30182	36	300	5	1.7	0.74	4131|4926|5058|23332|28964	MAP1B|NUMA1|PAK1|CLASP1|GIT1	-2.8	Phosphoproteome_Stukalov_A549-ACE2_24h_Up
GO Biological Processes	19	GO:2001236	regulation of extrinsic apoptotic signaling pathway	19_GO:0023052 signaling	-4.6	5.8	6	30182	156	300	9	3	0.98	1654|2017|3064|4000|4763|8682|8915|9181|51530	DDX3X|CTTN|HTT|LMNA|NF1|PEA15|BCL10|ARHGEF2|ZC3HC1	-2.8	Phosphoproteome_Stukalov_A549-ACE2_24h_Up
KEGG Pathway	24	hsa04150	mTOR signaling pathway		-4.6	5.8	6	30182	156	300	9	3	0.98	5594|5605|6194|6195|6197|6654|7249|84335|253260	MAPK1|MAP2K2|RPS6|RPS6KA1|RPS6KA3|SOS1|TSC2|AKT1S1|RICTOR	-2.8	Phosphoproteome_Stukalov_A549-ACE2_24h_Up
GO Biological Processes	19	GO:0031058	positive regulation of histone modification	19_GO:0048518 positive regulation of biological process	-4.5	8	6.6	30182	88	300	7	2.3	0.87	4000|5587|7936|10270|10514|25865|55183	LMNA|PRKD1|NELFE|AKAP8|MYBBP1A|PRKD2|RIF1	-2.8	Phosphoproteome_Stukalov_A549-ACE2_24h_Up
GO Biological Processes	19	GO:0031110	regulation of microtubule polymerization or depolymerization	19_GO:0050789 regulation of biological process	-4.5	8	6.6	30182	88	300	7	2.3	0.87	4131|4926|5058|9181|23271|23332|28964	MAP1B|NUMA1|PAK1|ARHGEF2|CAMSAP2|CLASP1|GIT1	-2.8	Phosphoproteome_Stukalov_A549-ACE2_24h_Up
GO Biological Processes	19	GO:0006338	chromatin remodeling	19_GO:0009987 cellular process	-4.5	3.7	5.3	30182	378	300	14	4.7	1.2	60|546|1786|3159|4000|4678|5058|6601|7994|8888|10514|22880|55183|196528	ACTB|ATRX|DNMT1|HMGA1|LMNA|NASP|PAK1|SMARCC2|KAT6A|MCM3AP|MYBBP1A|MORC2|RIF1|ARID2	-2.8	Phosphoproteome_Stukalov_A549-ACE2_24h_Up
Reactome Gene Sets	6	R-HSA-168255	Influenza Infection		-4.5	5.8	6	30182	157	300	9	3	0.98	4927|4928|6164|6194|6224|7175|8021|9972|23511	NUP88|NUP98|RPL34|RPS6|RPS20|TPR|NUP214|NUP153|NUP188	-2.8	Phosphoproteome_Stukalov_A549-ACE2_24h_Up
GO Biological Processes	19	GO:0043065	positive regulation of apoptotic process	19_GO:0048518 positive regulation of biological process	-4.5	3.2	5.1	30182	536	300	17	5.7	1.3	1654|3064|4763|5599|5883|6194|8644|8682|8878|8915|9368|9590|9774|10514|11218|23513|56993	DDX3X|HTT|NF1|MAPK8|RAD9A|RPS6|AKR1C3|PEA15|SQSTM1|BCL10|NHERF1|AKAP12|BCLAF1|MYBBP1A|DDX20|SCRIB|TOMM22	-2.8	Phosphoproteome_Stukalov_A549-ACE2_24h_Up
GO Biological Processes	19	GO:0051653	spindle localization	19_GO:0051179 localization	-4.5	9.9	7	30182	61	300	6	2	0.81	3064|4134|4926|23332|51203|126353	HTT|MAP4|NUMA1|CLASP1|NUSAP1|MISP	-2.8	Phosphoproteome_Stukalov_A549-ACE2_24h_Up
Reactome Gene Sets	6	R-HSA-444257	RSK activation		-4.5	43	11	30182	7	300	3	1	0.57	5594|6195|6197	MAPK1|RPS6KA1|RPS6KA3	-2.7	Phosphoproteome_Stukalov_A549-ACE2_24h_Up
GO Biological Processes	19	GO:0043244	regulation of protein-containing complex disassembly	19_GO:0050789 regulation of biological process	-4.5	6.5	6.2	30182	123	300	8	2.7	0.93	119|4131|6711|9181|23271|23332|55604|253725	ADD2|MAP1B|SPTBN1|ARHGEF2|CAMSAP2|CLASP1|CARMIL1|WASHC2C	-2.7	Phosphoproteome_Stukalov_A549-ACE2_24h_Up
Reactome Gene Sets	6	R-HSA-9609646	HCMV Infection		-4.5	5.7	5.9	30182	160	300	9	3	0.98	1956|4927|4928|7175|8021|9972|10155|23511|51143	EGFR|NUP88|NUP98|TPR|NUP214|NUP153|TRIM28|NUP188|DYNC1LI1	-2.7	Phosphoproteome_Stukalov_A549-ACE2_24h_Up
GO Biological Processes	19	GO:0007018	microtubule-based movement	19_GO:0009987 cellular process	-4.5	3.7	5.3	30182	384	300	14	4.7	1.2	3064|3315|3831|3895|4131|4134|5195|7110|9368|51143|55726|63971|64837|151195	HTT|HSPB1|KLC1|KTN1|MAP1B|MAP4|PEX14|TMF1|NHERF1|DYNC1LI1|INTS13|KIF13A|KLC2|CCNYL1	-2.7	Phosphoproteome_Stukalov_A549-ACE2_24h_Up
GO Biological Processes	19	GO:0032387	negative regulation of intracellular transport	19_GO:0051179 localization	-4.5	9.7	6.9	30182	62	300	6	2	0.81	392|4131|4763|7175|9972|55737	ARHGAP1|MAP1B|NF1|TPR|NUP153|VPS35	-2.7	Phosphoproteome_Stukalov_A549-ACE2_24h_Up
GO Biological Processes	19	GO:0034109	homotypic cell-cell adhesion	19_GO:0009987 cellular process	-4.5	9.7	6.9	30182	62	300	6	2	0.81	60|71|3315|9414|10398|10627	ACTB|ACTG1|HSPB1|TJP2|MYL9|MYL12A	-2.7	Phosphoproteome_Stukalov_A549-ACE2_24h_Up
GO Biological Processes	19	GO:0042147	retrograde transport, endosome to Golgi	19_GO:0051179 localization	-4.5	7.7	6.5	30182	91	300	7	2.3	0.87	8729|9043|9779|26000|55737|200576|253725	GBF1|SPAG9|TBC1D5|TBC1D10B|VPS35|PIKFYVE|WASHC2C	-2.7	Phosphoproteome_Stukalov_A549-ACE2_24h_Up
Reactome Gene Sets	6	R-HSA-70326	Glucose metabolism		-4.5	7.7	6.5	30182	91	300	7	2.3	0.87	226|4927|4928|7175|8021|9972|23511	ALDOA|NUP88|NUP98|TPR|NUP214|NUP153|NUP188	-2.7	Phosphoproteome_Stukalov_A549-ACE2_24h_Up
Reactome Gene Sets	6	R-HSA-73894	DNA Repair		-4.4	3.9	5.3	30182	336	300	13	4.3	1.2	60|2547|5599|5883|5887|5981|6612|6613|8924|9656|11284|51720|55183	ACTB|XRCC6|MAPK8|RAD9A|RAD23B|RFC1|SUMO3|SUMO2|HERC2|MDC1|PNKP|UIMC1|RIF1	-2.7	Phosphoproteome_Stukalov_A549-ACE2_24h_Up
GO Biological Processes	19	GO:0022604	regulation of cell morphogenesis	19_GO:0032502 developmental process	-4.4	4.5	5.5	30182	245	300	11	3.7	1.1	226|1627|2245|5747|9043|9368|23580|50848|55742|103910|283149	ALDOA|DBN1|FGD1|PTK2|SPAG9|NHERF1|CDC42EP4|F11R|PARVA|MYL12B|BCL9L	-2.7	Phosphoproteome_Stukalov_A549-ACE2_24h_Up
GO Biological Processes	19	GO:0006281	DNA repair	19_GO:0050896 response to stimulus	-4.4	3.3	5.1	30182	493	300	16	5.3	1.3	546|2547|5883|5887|5981|8924|9126|9656|10075|10155|11284|23047|51720|55183|64710|92667	ATRX|XRCC6|RAD9A|RAD23B|RFC1|HERC2|SMC3|MDC1|HUWE1|TRIM28|PNKP|PDS5B|UIMC1|RIF1|NUCKS1|MGME1	-2.7	Phosphoproteome_Stukalov_A549-ACE2_24h_Up
KEGG Pathway	24	hsa04912	GnRH signaling pathway		-4.4	7.6	6.4	30182	93	300	7	2.3	0.87	1956|4216|5331|5594|5599|5605|6654	EGFR|MAP3K4|PLCB3|MAPK1|MAPK8|MAP2K2|SOS1	-2.7	Phosphoproteome_Stukalov_A549-ACE2_24h_Up
Reactome Gene Sets	6	R-HSA-5625900	RHO GTPases activate CIT		-4.4	20	8.6	30182	20	300	4	1.3	0.66	4659|10398|10627|103910	PPP1R12A|MYL9|MYL12A|MYL12B	-2.7	Phosphoproteome_Stukalov_A549-ACE2_24h_Up
GO Biological Processes	19	GO:0040001	establishment of mitotic spindle localization	19_GO:0051179 localization	-4.4	13	7.4	30182	39	300	5	1.7	0.74	3064|4926|23332|51203|126353	HTT|NUMA1|CLASP1|NUSAP1|MISP	-2.7	Phosphoproteome_Stukalov_A549-ACE2_24h_Up
GO Biological Processes	19	GO:1902850	microtubule cytoskeleton organization involved in mitosis	19_GO:0009987 cellular process	-4.4	6.3	6	30182	127	300	8	2.7	0.93	3064|4134|4926|9126|23332|51203|55726|126353	HTT|MAP4|NUMA1|SMC3|CLASP1|NUSAP1|INTS13|MISP	-2.7	Phosphoproteome_Stukalov_A549-ACE2_24h_Up
GO Biological Processes	19	GO:0009991	response to extracellular stimulus	19_GO:0050896 response to stimulus	-4.4	3.2	5.1	30182	496	300	16	5.3	1.3	58|490|2029|3178|4131|5587|5594|5599|6566|8644|8915|9779|10514|23367|84687|253260	ACTA1|ATP2B1|ENSA|HNRNPA1|MAP1B|PRKD1|MAPK1|MAPK8|SLC16A1|AKR1C3|BCL10|TBC1D5|MYBBP1A|LARP1|PPP1R9B|RICTOR	-2.7	Phosphoproteome_Stukalov_A549-ACE2_24h_Up
KEGG Pathway	24	hsa04010	MAPK signaling pathway		-4.4	4.1	5.4	30182	294	300	12	4	1.1	1956|2317|3315|4216|4763|5058|5594|5599|5605|6195|6197|6654	EGFR|FLNB|HSPB1|MAP3K4|NF1|PAK1|MAPK1|MAPK8|MAP2K2|RPS6KA1|RPS6KA3|SOS1	-2.7	Phosphoproteome_Stukalov_A549-ACE2_24h_Up
GO Biological Processes	19	GO:0043068	positive regulation of programmed cell death	19_GO:0048518 positive regulation of biological process	-4.3	3.1	5	30182	553	300	17	5.7	1.3	1654|3064|4763|5599|5883|6194|8644|8682|8878|8915|9368|9590|9774|10514|11218|23513|56993	DDX3X|HTT|NF1|MAPK8|RAD9A|RPS6|AKR1C3|PEA15|SQSTM1|BCL10|NHERF1|AKAP12|BCLAF1|MYBBP1A|DDX20|SCRIB|TOMM22	-2.6	Phosphoproteome_Stukalov_A549-ACE2_24h_Up
GO Biological Processes	19	GO:1901880	negative regulation of protein depolymerization	19_GO:0048519 negative regulation of biological process	-4.3	9.3	6.7	30182	65	300	6	2	0.81	119|4131|6711|9181|23271|23332	ADD2|MAP1B|SPTBN1|ARHGEF2|CAMSAP2|CLASP1	-2.6	Phosphoproteome_Stukalov_A549-ACE2_24h_Up
Reactome Gene Sets	6	R-HSA-1500931	Cell-Cell communication		-4.3	6.2	6	30182	129	300	8	2.7	0.93	60|71|5747|5817|6711|50848|55742|56288	ACTB|ACTG1|PTK2|PVR|SPTBN1|F11R|PARVA|PARD3	-2.6	Phosphoproteome_Stukalov_A549-ACE2_24h_Up
Reactome Gene Sets	6	R-HSA-1280215	Cytokine Signaling in Immune system		-4.3	2.8	4.8	30182	730	300	20	6.7	1.4	103|2317|3726|4684|4927|4928|5594|5599|5707|5782|6195|6197|6654|7175|8021|8878|9491|9972|9987|23511	ADAR|FLNB|JUNB|NCAM1|NUP88|NUP98|MAPK1|MAPK8|PSMD1|PTPN12|RPS6KA1|RPS6KA3|SOS1|TPR|NUP214|SQSTM1|PSMF1|NUP153|HNRNPDL|NUP188	-2.6	Phosphoproteome_Stukalov_A549-ACE2_24h_Up
GO Biological Processes	19	GO:0045739	positive regulation of DNA repair	19_GO:0048518 positive regulation of biological process	-4.3	6.2	5.9	30182	130	300	8	2.7	0.93	60|1956|6601|10155|11284|51720|55183|196528	ACTB|EGFR|SMARCC2|TRIM28|PNKP|UIMC1|RIF1|ARID2	-2.6	Phosphoproteome_Stukalov_A549-ACE2_24h_Up
Reactome Gene Sets	6	R-HSA-5693532	DNA Double-Strand Break Repair		-4.3	5.4	5.7	30182	168	300	9	3	0.98	2547|5599|5883|5981|6613|8924|9656|51720|55183	XRCC6|MAPK8|RAD9A|RFC1|SUMO2|HERC2|MDC1|UIMC1|RIF1	-2.6	Phosphoproteome_Stukalov_A549-ACE2_24h_Up
Reactome Gene Sets	6	R-HSA-9694516	SARS-CoV-2 Infection		-4.3	4	5.3	30182	299	300	12	4	1.1	4927|4928|6194|6224|7082|7175|8021|9972|11218|23367|23511|79833	NUP88|NUP98|RPS6|RPS20|TJP1|TPR|NUP214|NUP153|DDX20|LARP1|NUP188|GEMIN6	-2.6	Phosphoproteome_Stukalov_A549-ACE2_24h_Up
GO Biological Processes	19	GO:0048871	multicellular organismal homeostasis	19_GO:0042592 homeostatic process	-4.3	3.1	4.9	30182	559	300	17	5.7	1.3	60|71|103|3315|4763|5926|6194|6654|7082|8878|9414|22985|28982|50848|51599|445582|728378	ACTB|ACTG1|ADAR|HSPB1|NF1|ARID4A|RPS6|SOS1|TJP1|SQSTM1|TJP2|ACIN1|FLVCR1|F11R|LSR|POTEE|POTEF	-2.6	Phosphoproteome_Stukalov_A549-ACE2_24h_Up
KEGG Pathway	24	hsa04015	Rap1 signaling pathway		-4.3	4.8	5.5	30182	210	300	10	3.3	1	60|71|1956|5331|5587|5594|5605|25865|56288|260425	ACTB|ACTG1|EGFR|PLCB3|PRKD1|MAPK1|MAP2K2|PRKD2|PARD3|MAGI3	-2.6	Phosphoproteome_Stukalov_A549-ACE2_24h_Up
GO Biological Processes	19	GO:0051294	establishment of spindle orientation	19_GO:0051179 localization	-4.3	12	7.2	30182	41	300	5	1.7	0.74	3064|4134|4926|23332|126353	HTT|MAP4|NUMA1|CLASP1|MISP	-2.6	Phosphoproteome_Stukalov_A549-ACE2_24h_Up
GO Biological Processes	19	GO:0038089	positive regulation of cell migration by vascular endothelial growth factor signaling pathway	19_GO:0040011 locomotion	-4.3	38	10	30182	8	300	3	1	0.57	3315|5587|25865	HSPB1|PRKD1|PRKD2	-2.6	Phosphoproteome_Stukalov_A549-ACE2_24h_Up
GO Biological Processes	19	GO:0090045	positive regulation of deacetylase activity	19_GO:0065007 biological regulation	-4.3	38	10	30182	8	300	3	1	0.57	5587|5599|25865	PRKD1|MAPK8|PRKD2	-2.6	Phosphoproteome_Stukalov_A549-ACE2_24h_Up
GO Biological Processes	19	GO:0006974	cellular response to DNA damage stimulus	19_GO:0050896 response to stimulus	-4.3	2.7	4.8	30182	736	300	20	6.7	1.4	546|2547|5058|5594|5883|5887|5981|8924|9126|9656|10075|10155|11284|22880|23047|51720|55183|64710|92667|144097	ATRX|XRCC6|PAK1|MAPK1|RAD9A|RAD23B|RFC1|HERC2|SMC3|MDC1|HUWE1|TRIM28|PNKP|MORC2|PDS5B|UIMC1|RIF1|NUCKS1|MGME1|SPINDOC	-2.6	Phosphoproteome_Stukalov_A549-ACE2_24h_Up
Reactome Gene Sets	6	R-HSA-6802952	Signaling by BRAF and RAF1 fusions		-4.3	9	6.6	30182	67	300	6	2	0.81	60|71|4000|5594|5605|23164	ACTB|ACTG1|LMNA|MAPK1|MAP2K2|MPRIP	-2.6	Phosphoproteome_Stukalov_A549-ACE2_24h_Up
GO Biological Processes	19	GO:0018107	peptidyl-threonine phosphorylation	19_GO:0008152 metabolic process	-4.3	9	6.6	30182	67	300	6	2	0.81	5587|5594|5599|8476|25865|65125	PRKD1|MAPK1|MAPK8|CDC42BPA|PRKD2|WNK1	-2.6	Phosphoproteome_Stukalov_A549-ACE2_24h_Up
Reactome Gene Sets	6	R-HSA-5619102	SLC transporter disorders		-4.2	7.2	6.1	30182	98	300	7	2.3	0.87	4927|4928|6566|7175|8021|9972|23511	NUP88|NUP98|SLC16A1|TPR|NUP214|NUP153|NUP188	-2.6	Phosphoproteome_Stukalov_A549-ACE2_24h_Up
GO Biological Processes	19	GO:1902905	positive regulation of supramolecular fiber organization	19_GO:0048518 positive regulation of biological process	-4.2	5.3	5.6	30182	171	300	9	3	0.98	2017|4131|4926|5058|23332|28964|55604|253260|253725	CTTN|MAP1B|NUMA1|PAK1|CLASP1|GIT1|CARMIL1|RICTOR|WASHC2C	-2.6	Phosphoproteome_Stukalov_A549-ACE2_24h_Up
GO Biological Processes	19	GO:0010942	positive regulation of cell death	19_GO:0048518 positive regulation of biological process	-4.2	2.9	4.8	30182	621	300	18	6	1.4	1654|3064|4763|5599|5883|6194|8644|8682|8878|8915|9368|9590|9774|10514|11218|23513|56993|79065	DDX3X|HTT|NF1|MAPK8|RAD9A|RPS6|AKR1C3|PEA15|SQSTM1|BCL10|NHERF1|AKAP12|BCLAF1|MYBBP1A|DDX20|SCRIB|TOMM22|ATG9A	-2.6	Phosphoproteome_Stukalov_A549-ACE2_24h_Up
Reactome Gene Sets	6	R-HSA-5357801	Programmed Cell Death		-4.2	4.7	5.5	30182	213	300	10	3.3	1	4000|5594|5599|5707|5747|7082|9414|9491|22985|28988	LMNA|MAPK1|MAPK8|PSMD1|PTK2|TJP1|TJP2|PSMF1|ACIN1|DBNL	-2.6	Phosphoproteome_Stukalov_A549-ACE2_24h_Up
Reactome Gene Sets	6	R-HSA-9035034	RHOF GTPase cycle		-4.2	12	7.1	30182	42	300	5	1.7	0.74	60|392|9590|26092|445582	ACTB|ARHGAP1|AKAP12|TOR1AIP1|POTEE	-2.6	Phosphoproteome_Stukalov_A549-ACE2_24h_Up
GO Biological Processes	19	GO:2001237	negative regulation of extrinsic apoptotic signaling pathway	19_GO:0023052 signaling	-4.2	7.1	6.1	30182	99	300	7	2.3	0.87	1654|2017|3064|4000|8682|9181|51530	DDX3X|CTTN|HTT|LMNA|PEA15|ARHGEF2|ZC3HC1	-2.5	Phosphoproteome_Stukalov_A549-ACE2_24h_Up
GO Biological Processes	19	GO:1900180	regulation of protein localization to nucleus	19_GO:0051179 localization	-4.2	6	5.8	30182	134	300	8	2.7	0.93	4000|4763|5587|6612|7175|10155|51574|387082	LMNA|NF1|PRKD1|SUMO3|TPR|TRIM28|LARP7|SUMO4	-2.5	Phosphoproteome_Stukalov_A549-ACE2_24h_Up
Canonical Pathways	11	M121	PID MTOR 4PATHWAY		-4.2	8.7	6.5	30182	69	300	6	2	0.81	5594|5605|6195|7249|84335|253260	MAPK1|MAP2K2|RPS6KA1|TSC2|AKT1S1|RICTOR	-2.5	Phosphoproteome_Stukalov_A549-ACE2_24h_Up
Reactome Gene Sets	6	R-HSA-9662360	Sensory processing of sound by inner hair cells of the cochlea		-4.2	8.7	6.5	30182	69	300	6	2	0.81	60|71|490|2036|6711|64787	ACTB|ACTG1|ATP2B1|EPB41L1|SPTBN1|EPS8L2	-2.5	Phosphoproteome_Stukalov_A549-ACE2_24h_Up
GO Biological Processes	19	GO:0034660	ncRNA metabolic process	19_GO:0008152 metabolic process	-4.2	3.1	4.9	30182	514	300	16	5.3	1.3	16|103|1654|4086|4839|6194|11137|26512|29102|51202|51574|51729|55726|79066|79074|114034	AARS1|ADAR|DDX3X|SMAD1|NOP2|RPS6|PWP1|INTS6|DROSHA|DDX47|LARP7|WBP11|INTS13|METTL16|C2orf49|TOE1	-2.5	Phosphoproteome_Stukalov_A549-ACE2_24h_Up
GO Biological Processes	19	GO:0010564	regulation of cell cycle process	19_GO:0050789 regulation of biological process	-4.2	2.7	4.7	30182	747	300	20	6.7	1.4	60|546|1602|1654|1956|4926|5883|6601|7175|9656|10514|28964|51143|51203|51720|54443|58525|63971|84687|196528	ACTB|ATRX|DACH1|DDX3X|EGFR|NUMA1|RAD9A|SMARCC2|TPR|MDC1|MYBBP1A|GIT1|DYNC1LI1|NUSAP1|UIMC1|ANLN|WIZ|KIF13A|PPP1R9B|ARID2	-2.5	Phosphoproteome_Stukalov_A549-ACE2_24h_Up
Reactome Gene Sets	6	R-HSA-162599	Late Phase of HIV Life Cycle		-4.2	5.9	5.8	30182	136	300	8	2.7	0.93	4927|4928|7175|7936|8021|9972|23511|51616	NUP88|NUP98|TPR|NELFE|NUP214|NUP153|NUP188|TAF9B	-2.5	Phosphoproteome_Stukalov_A549-ACE2_24h_Up
Reactome Gene Sets	6	R-HSA-9013026	RHOB GTPase cycle		-4.2	8.6	6.4	30182	70	300	6	2	0.81	70|392|9181|9414|9748|54443	ACTC1|ARHGAP1|ARHGEF2|TJP2|SLK|ANLN	-2.5	Phosphoproteome_Stukalov_A549-ACE2_24h_Up
KEGG Pathway	24	hsa05120	Epithelial cell signaling in Helicobacter pylori infection		-4.2	8.6	6.4	30182	70	300	6	2	0.81	1956|5058|5599|7082|28964|50848	EGFR|PAK1|MAPK8|TJP1|GIT1|F11R	-2.5	Phosphoproteome_Stukalov_A549-ACE2_24h_Up
Reactome Gene Sets	6	R-HSA-5619115	Disorders of transmembrane transporters		-4.1	5.1	5.5	30182	176	300	9	3	0.98	4927|4928|5707|6566|7175|8021|9491|9972|23511	NUP88|NUP98|PSMD1|SLC16A1|TPR|NUP214|PSMF1|NUP153|NUP188	-2.5	Phosphoproteome_Stukalov_A549-ACE2_24h_Up
KEGG Pathway	24	hsa05135	Yersinia infection		-4.1	5.9	5.7	30182	137	300	8	2.7	0.93	60|71|5594|5599|5605|5747|6195|6197	ACTB|ACTG1|MAPK1|MAPK8|MAP2K2|PTK2|RPS6KA1|RPS6KA3	-2.5	Phosphoproteome_Stukalov_A549-ACE2_24h_Up
KEGG Pathway	24	hsa04910	Insulin signaling pathway		-4.1	5.9	5.7	30182	137	300	8	2.7	0.93	2194|2997|5594|5599|5605|6194|6654|7249	FASN|GYS1|MAPK1|MAPK8|MAP2K2|RPS6|SOS1|TSC2	-2.5	Phosphoproteome_Stukalov_A549-ACE2_24h_Up
Canonical Pathways	11	M175	PID ERBB2 ERBB3 PATHWAY		-4.1	11	6.9	30182	44	300	5	1.7	0.74	5594|5599|5605|6654|85440	MAPK1|MAPK8|MAP2K2|SOS1|DOCK7	-2.5	Phosphoproteome_Stukalov_A549-ACE2_24h_Up
GO Biological Processes	19	GO:0008360	regulation of cell shape	19_GO:0032502 developmental process	-4.1	5.8	5.7	30182	138	300	8	2.7	0.93	226|2245|5747|9368|23580|50848|55742|103910	ALDOA|FGD1|PTK2|NHERF1|CDC42EP4|F11R|PARVA|MYL12B	-2.5	Phosphoproteome_Stukalov_A549-ACE2_24h_Up
GO Biological Processes	19	GO:1904776	regulation of protein localization to cell cortex	19_GO:0051179 localization	-4.1	34	9.8	30182	9	300	3	1	0.57	4926|84687|126353	NUMA1|PPP1R9B|MISP	-2.5	Phosphoproteome_Stukalov_A549-ACE2_24h_Up
Canonical Pathways	11	M71	PID ILK PATHWAY		-4.1	11	6.8	30182	45	300	5	1.7	0.74	4659|7791|10398|55742|253260	PPP1R12A|ZYX|MYL9|PARVA|RICTOR	-2.4	Phosphoproteome_Stukalov_A549-ACE2_24h_Up
GO Biological Processes	19	GO:0070527	platelet aggregation	19_GO:0032501 multicellular organismal process	-4.1	11	6.8	30182	45	300	5	1.7	0.74	60|71|3315|10398|10627	ACTB|ACTG1|HSPB1|MYL9|MYL12A	-2.4	Phosphoproteome_Stukalov_A549-ACE2_24h_Up
CORUM	33	CORUM:3055	Nop56p-associated pre-rRNA complex		-4.1	6.8	5.9	30182	104	300	7	2.3	0.87	59|72|3178|4904|6194|10514|11137	ACTA2|ACTG2|HNRNPA1|YBX1|RPS6|MYBBP1A|PWP1	-2.4	Phosphoproteome_Stukalov_A549-ACE2_24h_Up
GO Biological Processes	19	GO:0008283	cell population proliferation	19_GO:0009987 cellular process	-4.1	2.7	4.6	30182	699	300	19	6.3	1.4	1503|1602|1627|1956|3726|4086|4763|5594|5605|6194|6195|8878|9181|23047|23367|23513|65108|85440|196528	CTPS1|DACH1|DBN1|EGFR|JUNB|SMAD1|NF1|MAPK1|MAP2K2|RPS6|RPS6KA1|SQSTM1|ARHGEF2|PDS5B|LARP1|SCRIB|MARCKSL1|DOCK7|ARID2	-2.4	Phosphoproteome_Stukalov_A549-ACE2_24h_Up
GO Biological Processes	19	GO:0110053	regulation of actin filament organization	19_GO:0050789 regulation of biological process	-4.1	4.1	5.2	30182	268	300	11	3.7	1.1	71|119|2017|5058|6711|7082|23332|50848|55604|253260|253725	ACTG1|ADD2|CTTN|PAK1|SPTBN1|TJP1|CLASP1|F11R|CARMIL1|RICTOR|WASHC2C	-2.4	Phosphoproteome_Stukalov_A549-ACE2_24h_Up
Canonical Pathways	11	M17200	SA B CELL RECEPTOR COMPLEXES		-4.1	17	7.7	30182	24	300	4	1.3	0.66	5594|6195|6197|6654	MAPK1|RPS6KA1|RPS6KA3|SOS1	-2.4	Phosphoproteome_Stukalov_A549-ACE2_24h_Up
GO Biological Processes	19	GO:0061162	establishment of monopolar cell polarity	19_GO:0009987 cellular process	-4.1	17	7.7	30182	24	300	4	1.3	0.66	4131|8729|9368|23513	MAP1B|GBF1|NHERF1|SCRIB	-2.4	Phosphoproteome_Stukalov_A549-ACE2_24h_Up
GO Biological Processes	19	GO:0031056	regulation of histone modification	19_GO:0008152 metabolic process	-4.1	5.7	5.6	30182	141	300	8	2.7	0.93	4000|5587|7936|10270|10514|25865|55183|55677	LMNA|PRKD1|NELFE|AKAP8|MYBBP1A|PRKD2|RIF1|IWS1	-2.4	Phosphoproteome_Stukalov_A549-ACE2_24h_Up
GO Biological Processes	19	GO:0018105	peptidyl-serine phosphorylation	19_GO:0008152 metabolic process	-4.1	5	5.4	30182	181	300	9	3	0.98	5587|5594|5599|5605|6197|25865|65125|200576|253260	PRKD1|MAPK1|MAPK8|MAP2K2|RPS6KA3|PRKD2|WNK1|PIKFYVE|RICTOR	-2.4	Phosphoproteome_Stukalov_A549-ACE2_24h_Up
GO Biological Processes	19	GO:0032989	cellular component morphogenesis	19_GO:0032502 developmental process	-4	2.9	4.7	30182	590	300	17	5.7	1.3	58|70|71|2017|4131|4684|5058|5747|6654|7110|10398|23022|23077|28988|56288|85440|200576	ACTA1|ACTC1|ACTG1|CTTN|MAP1B|NCAM1|PAK1|PTK2|SOS1|TMF1|MYL9|PALLD|MYCBP2|DBNL|PARD3|DOCK7|PIKFYVE	-2.4	Phosphoproteome_Stukalov_A549-ACE2_24h_Up
Reactome Gene Sets	6	R-HSA-72306	tRNA processing		-4	6.6	5.8	30182	107	300	7	2.3	0.87	4927|4928|7175|8021|9972|23511|79074	NUP88|NUP98|TPR|NUP214|NUP153|NUP188|C2orf49	-2.4	Phosphoproteome_Stukalov_A549-ACE2_24h_Up
GO Biological Processes	19	GO:0046578	regulation of Ras protein signal transduction	19_GO:0023052 signaling	-4	4.9	5.3	30182	184	300	9	3	0.98	4763|8729|8878|9181|10928|28964|50848|55667|64787	NF1|GBF1|SQSTM1|ARHGEF2|RALBP1|GIT1|F11R|DENND4C|EPS8L2	-2.4	Phosphoproteome_Stukalov_A549-ACE2_24h_Up
Reactome Gene Sets	6	R-HSA-437239	Recycling pathway of L1		-4	11	6.7	30182	47	300	5	1.7	0.74	60|71|5594|6195|6197	ACTB|ACTG1|MAPK1|RPS6KA1|RPS6KA3	-2.4	Phosphoproteome_Stukalov_A549-ACE2_24h_Up
GO Biological Processes	19	GO:0070849	response to epidermal growth factor	19_GO:0050896 response to stimulus	-4	11	6.7	30182	47	300	5	1.7	0.74	1956|5594|5782|7175|84687	EGFR|MAPK1|PTPN12|TPR|PPP1R9B	-2.4	Phosphoproteome_Stukalov_A549-ACE2_24h_Up
GO Biological Processes	19	GO:0061339	establishment or maintenance of monopolar cell polarity	19_GO:0009987 cellular process	-4	16	7.6	30182	25	300	4	1.3	0.66	4131|8729|9368|23513	MAP1B|GBF1|NHERF1|SCRIB	-2.4	Phosphoproteome_Stukalov_A549-ACE2_24h_Up
GO Biological Processes	19	GO:0042058	regulation of epidermal growth factor receptor signaling pathway	19_GO:0023052 signaling	-4	8	6.1	30182	75	300	6	2	0.81	1956|5782|6654|9052|9961|79651	EGFR|PTPN12|SOS1|GPRC5A|MVP|RHBDF2	-2.4	Phosphoproteome_Stukalov_A549-ACE2_24h_Up
GO Biological Processes	19	GO:0043242	negative regulation of protein-containing complex disassembly	19_GO:0048519 negative regulation of biological process	-4	8	6.1	30182	75	300	6	2	0.81	119|4131|6711|9181|23271|23332	ADD2|MAP1B|SPTBN1|ARHGEF2|CAMSAP2|CLASP1	-2.4	Phosphoproteome_Stukalov_A549-ACE2_24h_Up
GO Biological Processes	19	GO:0002064	epithelial cell development	19_GO:0032502 developmental process	-4	4.9	5.3	30182	185	300	9	3	0.98	59|546|2194|2317|5926|7082|9414|23022|50848	ACTA2|ATRX|FASN|FLNB|ARID4A|TJP1|TJP2|PALLD|F11R	-2.4	Phosphoproteome_Stukalov_A549-ACE2_24h_Up
CORUM	33	CORUM:149	PBAF complex (Polybromo- and BAF containing complex)		-4	30	9.2	30182	10	300	3	1	0.57	60|6601|196528	ACTB|SMARCC2|ARID2	-2.3	Phosphoproteome_Stukalov_A549-ACE2_24h_Up
Reactome Gene Sets	6	R-HSA-9659379	Sensory processing of sound		-4	7.9	6.1	30182	76	300	6	2	0.81	60|71|490|2036|6711|64787	ACTB|ACTG1|ATP2B1|EPB41L1|SPTBN1|EPS8L2	-2.3	Phosphoproteome_Stukalov_A549-ACE2_24h_Up
GO Biological Processes	19	GO:0018210	peptidyl-threonine modification	19_GO:0008152 metabolic process	-3.9	7.8	6	30182	77	300	6	2	0.81	5587|5594|5599|8476|25865|65125	PRKD1|MAPK1|MAPK8|CDC42BPA|PRKD2|WNK1	-2.3	Phosphoproteome_Stukalov_A549-ACE2_24h_Up
GO Biological Processes	19	GO:0007026	negative regulation of microtubule depolymerization	19_GO:0048519 negative regulation of biological process	-3.9	15	7.4	30182	26	300	4	1.3	0.66	4131|9181|23271|23332	MAP1B|ARHGEF2|CAMSAP2|CLASP1	-2.3	Phosphoproteome_Stukalov_A549-ACE2_24h_Up
GO Biological Processes	19	GO:0071345	cellular response to cytokine stimulus	19_GO:0050896 response to stimulus	-3.9	2.7	4.5	30182	719	300	19	6.3	1.4	71|2117|2194|2317|3875|4904|5594|5887|6654|7175|7791|8531|9181|9590|9774|23580|55183|65125|221830	ACTG1|ETV3|FASN|FLNB|KRT18|YBX1|MAPK1|RAD23B|SOS1|TPR|ZYX|YBX3|ARHGEF2|AKAP12|BCLAF1|CDC42EP4|RIF1|WNK1|POLR1F	-2.3	Phosphoproteome_Stukalov_A549-ACE2_24h_Up
GO Biological Processes	19	GO:0000070	mitotic sister chromatid segregation	19_GO:0009987 cellular process	-3.9	5.4	5.4	30182	148	300	8	2.7	0.93	9126|10270|23047|23332|27436|51203|126353|283489	SMC3|AKAP8|PDS5B|CLASP1|EML4|NUSAP1|MISP|CHAMP1	-2.3	Phosphoproteome_Stukalov_A549-ACE2_24h_Up
GO Biological Processes	19	GO:2001234	negative regulation of apoptotic signaling pathway	19_GO:0023052 signaling	-3.9	4.3	5.1	30182	233	300	10	3.3	1	1654|2017|3064|3315|4000|8531|8682|9181|51530|51616	DDX3X|CTTN|HTT|HSPB1|LMNA|YBX3|PEA15|ARHGEF2|ZC3HC1|TAF9B	-2.3	Phosphoproteome_Stukalov_A549-ACE2_24h_Up
GO Biological Processes	19	GO:0051495	positive regulation of cytoskeleton organization	19_GO:0048518 positive regulation of biological process	-3.9	4.8	5.2	30182	190	300	9	3	0.98	2017|4131|4926|5058|23332|28964|55604|253260|253725	CTTN|MAP1B|NUMA1|PAK1|CLASP1|GIT1|CARMIL1|RICTOR|WASHC2C	-2.3	Phosphoproteome_Stukalov_A549-ACE2_24h_Up
GO Biological Processes	19	GO:0080135	regulation of cellular response to stress	19_GO:0050896 response to stimulus	-3.9	2.6	4.5	30182	726	300	19	6.3	1.4	60|1956|3315|3337|4216|5594|5605|5883|6449|6601|8531|9181|9774|10155|11284|51616|51720|55183|196528	ACTB|EGFR|HSPB1|DNAJB1|MAP3K4|MAPK1|MAP2K2|RAD9A|SGTA|SMARCC2|YBX3|ARHGEF2|BCLAF1|TRIM28|PNKP|TAF9B|UIMC1|RIF1|ARID2	-2.3	Phosphoproteome_Stukalov_A549-ACE2_24h_Up
KEGG Pathway	24	hsa01521	EGFR tyrosine kinase inhibitor resistance		-3.9	7.6	5.9	30182	79	300	6	2	0.81	1956|4763|5594|5605|6194|6654	EGFR|NF1|MAPK1|MAP2K2|RPS6|SOS1	-2.3	Phosphoproteome_Stukalov_A549-ACE2_24h_Up
GO Biological Processes	19	GO:0043488	regulation of mRNA stability	19_GO:0048519 negative regulation of biological process	-3.9	4.7	5.2	30182	192	300	9	3	0.98	4848|4904|8531|9967|23367|23589|26135|79066|196513	CNOT2|YBX1|YBX3|THRAP3|LARP1|CARHSP1|SERBP1|METTL16|DCP1B	-2.3	Phosphoproteome_Stukalov_A549-ACE2_24h_Up
GO Biological Processes	19	GO:0045936	negative regulation of phosphate metabolic process	19_GO:0048519 negative regulation of biological process	-3.8	3.2	4.7	30182	439	300	14	4.7	1.2	103|2029|3315|4763|7249|9043|9052|9961|11137|28964|56288|84335|84687|124790	ADAR|ENSA|HSPB1|NF1|TSC2|SPAG9|GPRC5A|MVP|PWP1|GIT1|PARD3|AKT1S1|PPP1R9B|HEXIM2	-2.3	Phosphoproteome_Stukalov_A549-ACE2_24h_Up
GO Biological Processes	19	GO:0010563	negative regulation of phosphorus metabolic process	19_GO:0048519 negative regulation of biological process	-3.8	3.2	4.7	30182	440	300	14	4.7	1.2	103|2029|3315|4763|7249|9043|9052|9961|11137|28964|56288|84335|84687|124790	ADAR|ENSA|HSPB1|NF1|TSC2|SPAG9|GPRC5A|MVP|PWP1|GIT1|PARD3|AKT1S1|PPP1R9B|HEXIM2	-2.2	Phosphoproteome_Stukalov_A549-ACE2_24h_Up
GO Biological Processes	19	GO:0016482	cytosolic transport	19_GO:0051179 localization	-3.8	5.3	5.3	30182	152	300	8	2.7	0.93	8729|9043|9779|26000|26115|55737|200576|253725	GBF1|SPAG9|TBC1D5|TBC1D10B|TANC2|VPS35|PIKFYVE|WASHC2C	-2.2	Phosphoproteome_Stukalov_A549-ACE2_24h_Up
GO Biological Processes	19	GO:0009895	negative regulation of catabolic process	19_GO:0048519 negative regulation of biological process	-3.8	3.6	4.8	30182	335	300	12	4	1.1	1956|4904|6449|7249|8531|9491|9967|23077|23367|28964|55737|57602	EGFR|YBX1|SGTA|TSC2|YBX3|PSMF1|THRAP3|MYCBP2|LARP1|GIT1|VPS35|USP36	-2.2	Phosphoproteome_Stukalov_A549-ACE2_24h_Up
KEGG Pathway	24	hsa04670	Leukocyte transendothelial migration		-3.8	6.2	5.5	30182	114	300	7	2.3	0.87	60|71|5747|10398|10627|50848|103910	ACTB|ACTG1|PTK2|MYL9|MYL12A|F11R|MYL12B	-2.2	Phosphoproteome_Stukalov_A549-ACE2_24h_Up
GO Biological Processes	19	GO:0032970	regulation of actin filament-based process	19_GO:0050789 regulation of biological process	-3.8	3.4	4.7	30182	387	300	13	4.3	1.2	59|71|119|2017|5058|6522|6711|7082|23332|50848|55604|253260|253725	ACTA2|ACTG1|ADD2|CTTN|PAK1|SLC4A2|SPTBN1|TJP1|CLASP1|F11R|CARMIL1|RICTOR|WASHC2C	-2.2	Phosphoproteome_Stukalov_A549-ACE2_24h_Up
Reactome Gene Sets	6	R-HSA-5625970	RHO GTPases activate KTN1		-3.8	27	8.8	30182	11	300	3	1	0.57	3831|3895|64837	KLC1|KTN1|KLC2	-2.2	Phosphoproteome_Stukalov_A549-ACE2_24h_Up
Canonical Pathways	11	M7955	SIG INSULIN RECEPTOR PATHWAY IN CARDIAC MYOCYTES		-3.8	9.9	6.3	30182	51	300	5	1.7	0.74	5594|6195|6197|6654|56288	MAPK1|RPS6KA1|RPS6KA3|SOS1|PARD3	-2.2	Phosphoproteome_Stukalov_A549-ACE2_24h_Up
Canonical Pathways	11	M220	PID CASPASE PATHWAY		-3.8	9.9	6.3	30182	51	300	5	1.7	0.74	58|3875|4000|4926|5747	ACTA1|KRT18|LMNA|NUMA1|PTK2	-2.2	Phosphoproteome_Stukalov_A549-ACE2_24h_Up
KEGG Pathway	24	hsa04921	Oxytocin signaling pathway		-3.8	5.2	5.3	30182	154	300	8	2.7	0.93	60|71|1956|4659|5331|5594|5605|10398	ACTB|ACTG1|EGFR|PPP1R12A|PLCB3|MAPK1|MAP2K2|MYL9	-2.2	Phosphoproteome_Stukalov_A549-ACE2_24h_Up
KEGG Pathway	24	hsa05130	Pathogenic Escherichia coli infection		-3.8	4.6	5.1	30182	197	300	9	3	0.98	60|71|2017|5058|5594|5599|7082|9181|9368	ACTB|ACTG1|CTTN|PAK1|MAPK1|MAPK8|TJP1|ARHGEF2|NHERF1	-2.2	Phosphoproteome_Stukalov_A549-ACE2_24h_Up
GO Biological Processes	19	GO:0070507	regulation of microtubule cytoskeleton organization	19_GO:0050789 regulation of biological process	-3.8	5.2	5.2	30182	155	300	8	2.7	0.93	4131|4926|5058|7175|9181|23271|23332|28964	MAP1B|NUMA1|PAK1|TPR|ARHGEF2|CAMSAP2|CLASP1|GIT1	-2.2	Phosphoproteome_Stukalov_A549-ACE2_24h_Up
GO Biological Processes	19	GO:1901184	regulation of ERBB signaling pathway	19_GO:0023052 signaling	-3.8	7.4	5.8	30182	82	300	6	2	0.81	1956|5782|6654|9052|9961|79651	EGFR|PTPN12|SOS1|GPRC5A|MVP|RHBDF2	-2.2	Phosphoproteome_Stukalov_A549-ACE2_24h_Up
GO Biological Processes	19	GO:0031400	negative regulation of protein modification process	19_GO:0048519 negative regulation of biological process	-3.8	3	4.5	30182	503	300	15	5	1.3	103|2029|3315|4763|6224|7249|8878|9043|9052|9961|11137|56288|84335|84687|124790	ADAR|ENSA|HSPB1|NF1|RPS20|TSC2|SQSTM1|SPAG9|GPRC5A|MVP|PWP1|PARD3|AKT1S1|PPP1R9B|HEXIM2	-2.2	Phosphoproteome_Stukalov_A549-ACE2_24h_Up
GO Biological Processes	19	GO:0042254	ribosome biogenesis	19_GO:0009987 cellular process	-3.8	3.8	4.8	30182	291	300	11	3.7	1.1	1654|4839|4927|6194|10514|11137|23195|29102|51202|51729|79066	DDX3X|NOP2|NUP88|RPS6|MYBBP1A|PWP1|MDN1|DROSHA|DDX47|WBP11|METTL16	-2.2	Phosphoproteome_Stukalov_A549-ACE2_24h_Up
GO Biological Processes	19	GO:0018209	peptidyl-serine modification	19_GO:0008152 metabolic process	-3.7	4.6	5	30182	199	300	9	3	0.98	5587|5594|5599|5605|6197|25865|65125|200576|253260	PRKD1|MAPK1|MAPK8|MAP2K2|RPS6KA3|PRKD2|WNK1|PIKFYVE|RICTOR	-2.2	Phosphoproteome_Stukalov_A549-ACE2_24h_Up
GO Biological Processes	19	GO:0031445	regulation of heterochromatin formation	19_GO:0048519 negative regulation of biological process	-3.7	14	7	30182	29	300	4	1.3	0.66	1786|7175|10155|22880	DNMT1|TPR|TRIM28|MORC2	-2.2	Phosphoproteome_Stukalov_A549-ACE2_24h_Up
GO Biological Processes	19	GO:0048009	insulin-like growth factor receptor signaling pathway	19_GO:0023052 signaling	-3.7	14	7	30182	29	300	4	1.3	0.66	5594|5605|6654|7249	MAPK1|MAP2K2|SOS1|TSC2	-2.2	Phosphoproteome_Stukalov_A549-ACE2_24h_Up
GO Biological Processes	19	GO:0120261	regulation of heterochromatin organization	19_GO:0050789 regulation of biological process	-3.7	14	7	30182	29	300	4	1.3	0.66	1786|7175|10155|22880	DNMT1|TPR|TRIM28|MORC2	-2.2	Phosphoproteome_Stukalov_A549-ACE2_24h_Up
Reactome Gene Sets	6	R-HSA-913531	Interferon Signaling		-3.7	4.5	5	30182	200	300	9	3	0.98	103|2317|4684|4927|4928|7175|8021|9972|23511	ADAR|FLNB|NCAM1|NUP88|NUP98|TPR|NUP214|NUP153|NUP188	-2.2	Phosphoproteome_Stukalov_A549-ACE2_24h_Up
GO Biological Processes	19	GO:0048729	tissue morphogenesis	19_GO:0032502 developmental process	-3.7	2.8	4.4	30182	566	300	16	5.3	1.3	58|59|60|70|71|72|1956|4086|5058|6654|7249|8915|9368|10155|23513|25865	ACTA1|ACTA2|ACTB|ACTC1|ACTG1|ACTG2|EGFR|SMAD1|PAK1|SOS1|TSC2|BCL10|NHERF1|TRIM28|SCRIB|PRKD2	-2.2	Phosphoproteome_Stukalov_A549-ACE2_24h_Up
GO Biological Processes	19	GO:0016073	snRNA metabolic process	19_GO:0008152 metabolic process	-3.7	9.3	6.1	30182	54	300	5	1.7	0.74	26512|51574|55726|79066|114034	INTS6|LARP7|INTS13|METTL16|TOE1	-2.2	Phosphoproteome_Stukalov_A549-ACE2_24h_Up
Reactome Gene Sets	6	R-HSA-9662361	Sensory processing of sound by outer hair cells of the cochlea		-3.7	9.3	6.1	30182	54	300	5	1.7	0.74	60|71|2036|6711|64787	ACTB|ACTG1|EPB41L1|SPTBN1|EPS8L2	-2.2	Phosphoproteome_Stukalov_A549-ACE2_24h_Up
Reactome Gene Sets	6	R-HSA-9013405	RHOD GTPase cycle		-3.7	9.3	6.1	30182	54	300	5	1.7	0.74	392|1627|9217|9590|26092	ARHGAP1|DBN1|VAPB|AKAP12|TOR1AIP1	-2.2	Phosphoproteome_Stukalov_A549-ACE2_24h_Up
GO Biological Processes	19	GO:0032956	regulation of actin cytoskeleton organization	19_GO:0050789 regulation of biological process	-3.7	3.5	4.7	30182	346	300	12	4	1.1	71|119|2017|5058|6522|6711|7082|23332|50848|55604|253260|253725	ACTG1|ADD2|CTTN|PAK1|SLC4A2|SPTBN1|TJP1|CLASP1|F11R|CARMIL1|RICTOR|WASHC2C	-2.2	Phosphoproteome_Stukalov_A549-ACE2_24h_Up
GO Biological Processes	19	GO:0150065	regulation of deacetylase activity	19_GO:0065007 biological regulation	-3.7	25	8.4	30182	12	300	3	1	0.57	5587|5599|25865	PRKD1|MAPK8|PRKD2	-2.2	Phosphoproteome_Stukalov_A549-ACE2_24h_Up
GO Biological Processes	19	GO:0090309	positive regulation of DNA methylation-dependent heterochromatin formation	19_GO:0048519 negative regulation of biological process	-3.7	25	8.4	30182	12	300	3	1	0.57	1786|10155|22880	DNMT1|TRIM28|MORC2	-2.2	Phosphoproteome_Stukalov_A549-ACE2_24h_Up
GO Biological Processes	19	GO:0090435	protein localization to nuclear envelope	19_GO:0051179 localization	-3.7	25	8.4	30182	12	300	3	1	0.57	4000|26092|55726	LMNA|TOR1AIP1|INTS13	-2.2	Phosphoproteome_Stukalov_A549-ACE2_24h_Up
GO Biological Processes	19	GO:0046831	regulation of RNA export from nucleus	19_GO:0051179 localization	-3.7	25	8.4	30182	12	300	3	1	0.57	7175|9972|55677	TPR|NUP153|IWS1	-2.2	Phosphoproteome_Stukalov_A549-ACE2_24h_Up
GO Biological Processes	19	GO:0016241	regulation of macroautophagy	19_GO:0008152 metabolic process	-3.7	5.1	5.1	30182	159	300	8	2.7	0.93	3064|5049|5599|7249|23367|25782|55737|57602	HTT|PAFAH1B2|MAPK8|TSC2|LARP1|RAB3GAP2|VPS35|USP36	-2.2	Phosphoproteome_Stukalov_A549-ACE2_24h_Up
GO Biological Processes	19	GO:0051494	negative regulation of cytoskeleton organization	19_GO:0048519 negative regulation of biological process	-3.7	5.1	5.1	30182	159	300	8	2.7	0.93	119|4131|6711|7082|9181|23271|23332|50848	ADD2|MAP1B|SPTBN1|TJP1|ARHGEF2|CAMSAP2|CLASP1|F11R	-2.2	Phosphoproteome_Stukalov_A549-ACE2_24h_Up
GO Biological Processes	19	GO:0071407	cellular response to organic cyclic compound	19_GO:0050896 response to stimulus	-3.7	3	4.5	30182	510	300	15	5	1.3	60|490|1786|1956|4086|5594|6294|6566|7110|8644|9368|23367|23543|84458|84687	ACTB|ATP2B1|DNMT1|EGFR|SMAD1|MAPK1|SAFB|SLC16A1|TMF1|AKR1C3|NHERF1|LARP1|RBFOX2|LCOR|PPP1R9B	-2.2	Phosphoproteome_Stukalov_A549-ACE2_24h_Up
Reactome Gene Sets	6	R-HSA-6811442	Intra-Golgi and retrograde Golgi-to-ER traffic		-3.7	4.5	5	30182	202	300	9	3	0.98	1314|3831|5049|7110|8729|9382|25782|51143|64837	COPA|KLC1|PAFAH1B2|TMF1|GBF1|COG1|RAB3GAP2|DYNC1LI1|KLC2	-2.2	Phosphoproteome_Stukalov_A549-ACE2_24h_Up
KEGG Pathway	24	hsa04935	Growth hormone synthesis, secretion and action		-3.7	5.9	5.4	30182	120	300	7	2.3	0.87	3726|5331|5594|5599|5605|5747|6654	JUNB|PLCB3|MAPK1|MAPK8|MAP2K2|PTK2|SOS1	-2.2	Phosphoproteome_Stukalov_A549-ACE2_24h_Up
GO Biological Processes	19	GO:0031114	regulation of microtubule depolymerization	19_GO:0050789 regulation of biological process	-3.7	13	6.8	30182	30	300	4	1.3	0.66	4131|9181|23271|23332	MAP1B|ARHGEF2|CAMSAP2|CLASP1	-2.1	Phosphoproteome_Stukalov_A549-ACE2_24h_Up
Canonical Pathways	11	M83	PID CDC42 REG PATHWAY		-3.7	13	6.8	30182	30	300	4	1.3	0.66	392|2245|10928|28964	ARHGAP1|FGD1|RALBP1|GIT1	-2.1	Phosphoproteome_Stukalov_A549-ACE2_24h_Up
Reactome Gene Sets	6	R-HSA-9013409	RHOJ GTPase cycle		-3.7	9.1	6.1	30182	55	300	5	1.7	0.74	392|5058|8476|23513|28964	ARHGAP1|PAK1|CDC42BPA|SCRIB|GIT1	-2.1	Phosphoproteome_Stukalov_A549-ACE2_24h_Up
Canonical Pathways	11	M276	PID FGF PATHWAY		-3.7	9.1	6.1	30182	55	300	5	1.7	0.74	2017|4684|5594|6195|6654	CTTN|NCAM1|MAPK1|RPS6KA1|SOS1	-2.1	Phosphoproteome_Stukalov_A549-ACE2_24h_Up
GO Biological Processes	19	GO:0043487	regulation of RNA stability	19_GO:0008152 metabolic process	-3.7	4.4	4.9	30182	204	300	9	3	0.98	4848|4904|8531|9967|23367|23589|26135|79066|196513	CNOT2|YBX1|YBX3|THRAP3|LARP1|CARHSP1|SERBP1|METTL16|DCP1B	-2.1	Phosphoproteome_Stukalov_A549-ACE2_24h_Up
GO Biological Processes	19	GO:0000819	sister chromatid segregation	19_GO:0009987 cellular process	-3.7	5	5.1	30182	161	300	8	2.7	0.93	9126|10270|23047|23332|27436|51203|126353|283489	SMC3|AKAP8|PDS5B|CLASP1|EML4|NUSAP1|MISP|CHAMP1	-2.1	Phosphoproteome_Stukalov_A549-ACE2_24h_Up
Reactome Gene Sets	6	R-HSA-397014	Muscle contraction		-3.6	4.4	4.9	30182	205	300	9	3	0.98	58|59|70|72|490|5058|10398|10627|103910	ACTA1|ACTA2|ACTC1|ACTG2|ATP2B1|PAK1|MYL9|MYL12A|MYL12B	-2.1	Phosphoproteome_Stukalov_A549-ACE2_24h_Up
GO Biological Processes	19	GO:1902904	negative regulation of supramolecular fiber organization	19_GO:0048519 negative regulation of biological process	-3.6	5	5.1	30182	162	300	8	2.7	0.93	119|4131|6711|7082|9181|23271|23332|50848	ADD2|MAP1B|SPTBN1|TJP1|ARHGEF2|CAMSAP2|CLASP1|F11R	-2.1	Phosphoproteome_Stukalov_A549-ACE2_24h_Up
GO Biological Processes	19	GO:0071276	cellular response to cadmium ion	19_GO:0050896 response to stimulus	-3.6	13	6.7	30182	31	300	4	1.3	0.66	1956|5594|5599|8644	EGFR|MAPK1|MAPK8|AKR1C3	-2.1	Phosphoproteome_Stukalov_A549-ACE2_24h_Up
Reactome Gene Sets	6	R-HSA-450282	MAPK targets/ Nuclear events mediated by MAP kinases		-3.6	13	6.7	30182	31	300	4	1.3	0.66	5594|5599|6195|6197	MAPK1|MAPK8|RPS6KA1|RPS6KA3	-2.1	Phosphoproteome_Stukalov_A549-ACE2_24h_Up
Canonical Pathways	11	M213	PID AR NONGENOMIC PATHWAY		-3.6	13	6.7	30182	31	300	4	1.3	0.66	5331|5594|5605|5747	PLCB3|MAPK1|MAP2K2|PTK2	-2.1	Phosphoproteome_Stukalov_A549-ACE2_24h_Up
GO Biological Processes	19	GO:0070848	response to growth factor	19_GO:0050896 response to stimulus	-3.6	2.9	4.4	30182	520	300	15	5	1.3	59|1956|3315|4086|4131|5587|5594|5747|5782|6654|7175|7791|25865|84335|84687	ACTA2|EGFR|HSPB1|SMAD1|MAP1B|PRKD1|MAPK1|PTK2|PTPN12|SOS1|TPR|ZYX|PRKD2|AKT1S1|PPP1R9B	-2.1	Phosphoproteome_Stukalov_A549-ACE2_24h_Up
KEGG Pathway	24	hsa04611	Platelet activation		-3.6	5.7	5.2	30182	124	300	7	2.3	0.87	60|71|4659|5331|5594|10627|103910	ACTB|ACTG1|PPP1R12A|PLCB3|MAPK1|MYL12A|MYL12B	-2.1	Phosphoproteome_Stukalov_A549-ACE2_24h_Up
KEGG Pathway	24	hsa04540	Gap junction		-3.6	6.9	5.5	30182	88	300	6	2	0.81	1956|5331|5594|5605|6654|7082	EGFR|PLCB3|MAPK1|MAP2K2|SOS1|TJP1	-2.1	Phosphoproteome_Stukalov_A549-ACE2_24h_Up
CORUM	33	CORUM:189	BAF complex		-3.6	23	8	30182	13	300	3	1	0.57	60|71|6601	ACTB|ACTG1|SMARCC2	-2.1	Phosphoproteome_Stukalov_A549-ACE2_24h_Up
GO Biological Processes	19	GO:0033262	regulation of nuclear cell cycle DNA replication	19_GO:0008152 metabolic process	-3.6	23	8	30182	13	300	3	1	0.57	546|1602|58525	ATRX|DACH1|WIZ	-2.1	Phosphoproteome_Stukalov_A549-ACE2_24h_Up
GO Biological Processes	19	GO:0050792	regulation of viral process	19_GO:0016032 viral process	-3.6	4.9	5	30182	165	300	8	2.7	0.93	103|1654|9217|10155|10465|22880|23367|51574	ADAR|DDX3X|VAPB|TRIM28|PPIH|MORC2|LARP1|LARP7	-2.1	Phosphoproteome_Stukalov_A549-ACE2_24h_Up
GO Biological Processes	19	GO:0031667	response to nutrient levels	19_GO:0050896 response to stimulus	-3.6	3	4.4	30182	466	300	14	4.7	1.2	490|2029|3178|4131|5587|5594|5599|6566|8644|8915|9779|10514|23367|253260	ATP2B1|ENSA|HNRNPA1|MAP1B|PRKD1|MAPK1|MAPK8|SLC16A1|AKR1C3|BCL10|TBC1D5|MYBBP1A|LARP1|RICTOR	-2.1	Phosphoproteome_Stukalov_A549-ACE2_24h_Up
GO Biological Processes	19	GO:0000902	cell morphogenesis	19_GO:0032502 developmental process	-3.6	2.7	4.3	30182	643	300	17	5.7	1.3	1956|2017|2317|4131|4684|5058|5747|6654|9181|9368|10486|23022|23077|23513|28988|56288|85440	EGFR|CTTN|FLNB|MAP1B|NCAM1|PAK1|PTK2|SOS1|ARHGEF2|NHERF1|CAP2|PALLD|MYCBP2|SCRIB|DBNL|PARD3|DOCK7	-2.1	Phosphoproteome_Stukalov_A549-ACE2_24h_Up
Reactome Gene Sets	6	R-HSA-9705671	SARS-CoV-2 activates/modulates innate and adaptive immune responses		-3.6	5.6	5.2	30182	126	300	7	2.3	0.87	4927|4928|7175|8021|9972|23367|23511	NUP88|NUP98|TPR|NUP214|NUP153|LARP1|NUP188	-2.1	Phosphoproteome_Stukalov_A549-ACE2_24h_Up
Reactome Gene Sets	6	R-HSA-2871796	FCERI mediated MAPK activation		-3.6	13	6.6	30182	32	300	4	1.3	0.66	5058|5594|5599|6654	PAK1|MAPK1|MAPK8|SOS1	-2.1	Phosphoproteome_Stukalov_A549-ACE2_24h_Up
GO Biological Processes	19	GO:0120035	regulation of plasma membrane bounded cell projection organization	19_GO:0050789 regulation of biological process	-3.5	2.7	4.2	30182	645	300	17	5.7	1.3	1627|3064|4131|4134|4898|5058|5587|5605|23077|23271|23580|26115|54443|55604|55737|64787|162427	DBN1|HTT|MAP1B|MAP4|NRDC|PAK1|PRKD1|MAP2K2|MYCBP2|CAMSAP2|CDC42EP4|TANC2|ANLN|CARMIL1|VPS35|EPS8L2|RETREG3	-2	Phosphoproteome_Stukalov_A549-ACE2_24h_Up
GO Biological Processes	19	GO:0006259	DNA metabolic process	19_GO:0008152 metabolic process	-3.5	2.5	4.2	30182	770	300	19	6.3	1.4	546|1786|2547|3159|4678|5883|5887|5981|8924|9126|9656|10075|10155|11284|23047|51720|55183|64710|92667	ATRX|DNMT1|XRCC6|HMGA1|NASP|RAD9A|RAD23B|RFC1|HERC2|SMC3|MDC1|HUWE1|TRIM28|PNKP|PDS5B|UIMC1|RIF1|NUCKS1|MGME1	-2	Phosphoproteome_Stukalov_A549-ACE2_24h_Up
GO Biological Processes	19	GO:0061013	regulation of mRNA catabolic process	19_GO:0048519 negative regulation of biological process	-3.5	4.3	4.8	30182	212	300	9	3	0.98	4848|4904|8531|9967|23367|23589|26135|79066|196513	CNOT2|YBX1|YBX3|THRAP3|LARP1|CARHSP1|SERBP1|METTL16|DCP1B	-2	Phosphoproteome_Stukalov_A549-ACE2_24h_Up
KEGG Pathway	24	hsa05225	Hepatocellular carcinoma		-3.5	4.8	4.9	30182	168	300	8	2.7	0.93	60|71|1956|5594|5605|6601|6654|196528	ACTB|ACTG1|EGFR|MAPK1|MAP2K2|SMARCC2|SOS1|ARID2	-2	Phosphoproteome_Stukalov_A549-ACE2_24h_Up
GO Biological Processes	19	GO:0031175	neuron projection development	19_GO:0032502 developmental process	-3.5	2.6	4.2	30182	647	300	17	5.7	1.3	2017|4131|4134|4684|5058|5747|6654|9368|23022|23077|23271|23513|25814|28988|56288|84687|85440	CTTN|MAP1B|MAP4|NCAM1|PAK1|PTK2|SOS1|NHERF1|PALLD|MYCBP2|CAMSAP2|SCRIB|ATXN10|DBNL|PARD3|PPP1R9B|DOCK7	-2	Phosphoproteome_Stukalov_A549-ACE2_24h_Up
GO Biological Processes	19	GO:0007169	transmembrane receptor protein tyrosine kinase signaling pathway	19_GO:0023052 signaling	-3.5	3.1	4.4	30182	416	300	13	4.3	1.2	1956|3315|5058|5587|5594|5605|5747|6654|7249|9961|25865|28964|84335	EGFR|HSPB1|PAK1|PRKD1|MAPK1|MAP2K2|PTK2|SOS1|TSC2|MVP|PRKD2|GIT1|AKT1S1	-2	Phosphoproteome_Stukalov_A549-ACE2_24h_Up
Reactome Gene Sets	6	R-HSA-446728	Cell junction organization		-3.5	6.6	5.4	30182	91	300	6	2	0.81	60|71|5817|50848|55742|56288	ACTB|ACTG1|PVR|F11R|PARVA|PARD3	-2	Phosphoproteome_Stukalov_A549-ACE2_24h_Up
GO Biological Processes	19	GO:1904375	regulation of protein localization to cell periphery	19_GO:0051179 localization	-3.5	5.5	5.1	30182	128	300	7	2.3	0.87	60|1956|4926|6711|8878|84687|126353	ACTB|EGFR|NUMA1|SPTBN1|SQSTM1|PPP1R9B|MISP	-2	Phosphoproteome_Stukalov_A549-ACE2_24h_Up
GO Biological Processes	19	GO:2001020	regulation of response to DNA damage stimulus	19_GO:0050896 response to stimulus	-3.5	3.6	4.5	30182	311	300	11	3.7	1.1	60|1956|5883|6601|9774|10155|11284|51616|51720|55183|196528	ACTB|EGFR|RAD9A|SMARCC2|BCLAF1|TRIM28|PNKP|TAF9B|UIMC1|RIF1|ARID2	-2	Phosphoproteome_Stukalov_A549-ACE2_24h_Up
GO Biological Processes	19	GO:0098609	cell-cell adhesion	19_GO:0009987 cellular process	-3.5	2.8	4.3	30182	531	300	15	5	1.3	60|71|119|1956|3315|3875|5817|7082|9414|10398|10627|23022|23513|50848|55742	ACTB|ACTG1|ADD2|EGFR|HSPB1|KRT18|PVR|TJP1|TJP2|MYL9|MYL12A|PALLD|SCRIB|F11R|PARVA	-2	Phosphoproteome_Stukalov_A549-ACE2_24h_Up
GO Biological Processes	19	GO:1901185	negative regulation of ERBB signaling pathway	19_GO:0023052 signaling	-3.5	12	6.4	30182	33	300	4	1.3	0.66	1956|5782|9052|9961	EGFR|PTPN12|GPRC5A|MVP	-2	Phosphoproteome_Stukalov_A549-ACE2_24h_Up
GO Biological Processes	19	GO:0048010	vascular endothelial growth factor receptor signaling pathway	19_GO:0023052 signaling	-3.5	12	6.4	30182	33	300	4	1.3	0.66	3315|5587|5747|25865	HSPB1|PRKD1|PTK2|PRKD2	-2	Phosphoproteome_Stukalov_A549-ACE2_24h_Up
GO Biological Processes	19	GO:0061028	establishment of endothelial barrier	19_GO:0032502 developmental process	-3.5	12	6.4	30182	33	300	4	1.3	0.66	2194|7082|9414|50848	FASN|TJP1|TJP2|F11R	-2	Phosphoproteome_Stukalov_A549-ACE2_24h_Up
KEGG Pathway	24	hsa04926	Relaxin signaling pathway		-3.5	5.5	5.1	30182	129	300	7	2.3	0.87	59|1956|5331|5594|5599|5605|6654	ACTA2|EGFR|PLCB3|MAPK1|MAPK8|MAP2K2|SOS1	-2	Phosphoproteome_Stukalov_A549-ACE2_24h_Up
GO Biological Processes	19	GO:0036010	protein localization to endosome	19_GO:0051179 localization	-3.5	22	7.7	30182	14	300	3	1	0.57	23513|55737|253725	SCRIB|VPS35|WASHC2C	-2	Phosphoproteome_Stukalov_A549-ACE2_24h_Up
GO Biological Processes	19	GO:0006999	nuclear pore organization	19_GO:0009987 cellular process	-3.5	22	7.7	30182	14	300	3	1	0.57	4928|7175|9972	NUP98|TPR|NUP153	-2	Phosphoproteome_Stukalov_A549-ACE2_24h_Up
GO Biological Processes	19	GO:0031053	primary miRNA processing	19_GO:0048519 negative regulation of biological process	-3.5	22	7.7	30182	14	300	3	1	0.57	1654|4086|29102	DDX3X|SMAD1|DROSHA	-2	Phosphoproteome_Stukalov_A549-ACE2_24h_Up
CORUM	33	CORUM:6671	PI4K2A-WASH complex		-3.5	22	7.7	30182	14	300	3	1	0.57	9181|55361|85440	ARHGEF2|PI4K2A|DOCK7	-2	Phosphoproteome_Stukalov_A549-ACE2_24h_Up
Canonical Pathways	11	M7	PID FCER1 PATHWAY		-3.5	8.4	5.7	30182	60	300	5	1.7	0.74	5594|5599|5605|5747|6654	MAPK1|MAPK8|MAP2K2|PTK2|SOS1	-2	Phosphoproteome_Stukalov_A549-ACE2_24h_Up
GO Biological Processes	19	GO:0140014	mitotic nuclear division	19_GO:0009987 cellular process	-3.5	4.7	4.9	30182	171	300	8	2.7	0.93	9126|10270|23047|23332|27436|51203|126353|283489	SMC3|AKAP8|PDS5B|CLASP1|EML4|NUSAP1|MISP|CHAMP1	-2	Phosphoproteome_Stukalov_A549-ACE2_24h_Up
GO Biological Processes	19	GO:0022411	cellular component disassembly	19_GO:0009987 cellular process	-3.5	3.5	4.5	30182	315	300	11	3.7	1.1	3159|3831|5195|6601|8729|8878|22985|79065|84687|162427|196528	HMGA1|KLC1|PEX14|SMARCC2|GBF1|SQSTM1|ACIN1|ATG9A|PPP1R9B|RETREG3|ARID2	-2	Phosphoproteome_Stukalov_A549-ACE2_24h_Up
GO Biological Processes	19	GO:0032212	positive regulation of telomere maintenance via telomerase	19_GO:0048518 positive regulation of biological process	-3.5	12	6.3	30182	34	300	4	1.3	0.66	3178|4216|5594|11284	HNRNPA1|MAP3K4|MAPK1|PNKP	-2	Phosphoproteome_Stukalov_A549-ACE2_24h_Up
Reactome Gene Sets	6	R-HSA-2029482	Regulation of actin dynamics for phagocytic cup formation		-3.5	8.2	5.7	30182	61	300	5	1.7	0.74	60|71|5058|5594|5747	ACTB|ACTG1|PAK1|MAPK1|PTK2	-2	Phosphoproteome_Stukalov_A549-ACE2_24h_Up
Canonical Pathways	11	M58	PID AR PATHWAY		-3.5	8.2	5.7	30182	61	300	5	1.7	0.74	2547|3178|6197|7110|24149	XRCC6|HNRNPA1|RPS6KA3|TMF1|ZNF318	-2	Phosphoproteome_Stukalov_A549-ACE2_24h_Up
GO Biological Processes	19	GO:2001242	regulation of intrinsic apoptotic signaling pathway	19_GO:0023052 signaling	-3.4	4.7	4.8	30182	173	300	8	2.7	0.93	1654|3315|5883|8531|9181|9368|9774|51616	DDX3X|HSPB1|RAD9A|YBX3|ARHGEF2|NHERF1|BCLAF1|TAF9B	-2	Phosphoproteome_Stukalov_A549-ACE2_24h_Up
GO Biological Processes	19	GO:0071900	regulation of protein serine/threonine kinase activity	19_GO:0008152 metabolic process	-3.4	3.3	4.4	30182	369	300	12	4	1.1	60|1654|1956|3064|4216|4763|5058|5605|6654|51755|124790|151195	ACTB|DDX3X|EGFR|HTT|MAP3K4|NF1|PAK1|MAP2K2|SOS1|CDK12|HEXIM2|CCNYL1	-2	Phosphoproteome_Stukalov_A549-ACE2_24h_Up
GO Biological Processes	19	GO:0051492	regulation of stress fiber assembly	19_GO:0050789 regulation of biological process	-3.4	6.4	5.3	30182	94	300	6	2	0.81	71|5058|7082|23332|50848|55604	ACTG1|PAK1|TJP1|CLASP1|F11R|CARMIL1	-2	Phosphoproteome_Stukalov_A549-ACE2_24h_Up
GO Biological Processes	19	GO:0006892	post-Golgi vesicle-mediated transport	19_GO:0051179 localization	-3.4	6.4	5.3	30182	94	300	6	2	0.81	3875|6711|8729|10066|10067|63971	KRT18|SPTBN1|GBF1|SCAMP2|SCAMP3|KIF13A	-2	Phosphoproteome_Stukalov_A549-ACE2_24h_Up
GO Biological Processes	19	GO:0031344	regulation of cell projection organization	19_GO:0050789 regulation of biological process	-3.4	2.6	4.1	30182	660	300	17	5.7	1.3	1627|3064|4131|4134|4898|5058|5587|5605|23077|23271|23580|26115|54443|55604|55737|64787|162427	DBN1|HTT|MAP1B|MAP4|NRDC|PAK1|PRKD1|MAP2K2|MYCBP2|CAMSAP2|CDC42EP4|TANC2|ANLN|CARMIL1|VPS35|EPS8L2|RETREG3	-2	Phosphoproteome_Stukalov_A549-ACE2_24h_Up
Reactome Gene Sets	6	R-HSA-376176	Signaling by ROBO receptors		-3.4	4.1	4.7	30182	219	300	9	3	0.98	5058|5707|6164|6194|6224|6654|9491|10486|23332	PAK1|PSMD1|RPL34|RPS6|RPS20|SOS1|PSMF1|CAP2|CLASP1	-2	Phosphoproteome_Stukalov_A549-ACE2_24h_Up
GO Biological Processes	19	GO:0000398	mRNA splicing, via spliceosome	19_GO:0008152 metabolic process	-3.4	3.8	4.6	30182	267	300	10	3.3	1	3178|3187|9169|10250|10465|11218|22913|23524|51747|79833	HNRNPA1|HNRNPH1|SCAF11|SRRM1|PPIH|DDX20|RALY|SRRM2|LUC7L3|GEMIN6	-2	Phosphoproteome_Stukalov_A549-ACE2_24h_Up
GO Biological Processes	19	GO:0000377	RNA splicing, via transesterification reactions with bulged adenosine as nucleophile	19_GO:0008152 metabolic process	-3.4	3.8	4.6	30182	267	300	10	3.3	1	3178|3187|9169|10250|10465|11218|22913|23524|51747|79833	HNRNPA1|HNRNPH1|SCAF11|SRRM1|PPIH|DDX20|RALY|SRRM2|LUC7L3|GEMIN6	-2	Phosphoproteome_Stukalov_A549-ACE2_24h_Up
GO Biological Processes	19	GO:0071496	cellular response to external stimulus	19_GO:0050896 response to stimulus	-3.4	3.5	4.5	30182	318	300	11	3.7	1.1	490|3178|5587|5594|5599|8644|8915|10514|50848|84687|253260	ATP2B1|HNRNPA1|PRKD1|MAPK1|MAPK8|AKR1C3|BCL10|MYBBP1A|F11R|PPP1R9B|RICTOR	-2	Phosphoproteome_Stukalov_A549-ACE2_24h_Up
Reactome Gene Sets	6	R-HSA-8856688	Golgi-to-ER retrograde transport		-3.4	5.3	5	30182	133	300	7	2.3	0.87	1314|3831|5049|8729|25782|51143|64837	COPA|KLC1|PAFAH1B2|GBF1|RAB3GAP2|DYNC1LI1|KLC2	-1.9	Phosphoproteome_Stukalov_A549-ACE2_24h_Up
KEGG Pathway	24	hsa04270	Vascular smooth muscle contraction		-3.4	5.3	4.9	30182	134	300	7	2.3	0.87	59|72|4659|5331|5594|5605|10398	ACTA2|ACTG2|PPP1R12A|PLCB3|MAPK1|MAP2K2|MYL9	-1.9	Phosphoproteome_Stukalov_A549-ACE2_24h_Up
Reactome Gene Sets	6	R-HSA-2454202	Fc epsilon receptor (FCERI) signaling		-3.4	5.3	4.9	30182	134	300	7	2.3	0.87	5058|5594|5599|5707|6654|8915|9491	PAK1|MAPK1|MAPK8|PSMD1|SOS1|BCL10|PSMF1	-1.9	Phosphoproteome_Stukalov_A549-ACE2_24h_Up
GO Biological Processes	19	GO:0032239	regulation of nucleobase-containing compound transport	19_GO:0051179 localization	-3.4	20	7.4	30182	15	300	3	1	0.57	7175|9972|55677	TPR|NUP153|IWS1	-1.9	Phosphoproteome_Stukalov_A549-ACE2_24h_Up
GO Biological Processes	19	GO:2001028	positive regulation of endothelial cell chemotaxis	19_GO:0040011 locomotion	-3.4	20	7.4	30182	15	300	3	1	0.57	3315|5587|25865	HSPB1|PRKD1|PRKD2	-1.9	Phosphoproteome_Stukalov_A549-ACE2_24h_Up
GO Biological Processes	19	GO:0008356	asymmetric cell division	19_GO:0009987 cellular process	-3.4	20	7.4	30182	15	300	3	1	0.57	9181|56288|85440	ARHGEF2|PARD3|DOCK7	-1.9	Phosphoproteome_Stukalov_A549-ACE2_24h_Up
GO Biological Processes	19	GO:0043086	negative regulation of catalytic activity	19_GO:0065007 biological regulation	-3.4	2.6	4.1	30182	666	300	17	5.7	1.3	103|1654|3315|4659|4763|6195|6197|6224|7249|9052|9961|11284|50848|65125|84335|84687|124790	ADAR|DDX3X|HSPB1|PPP1R12A|NF1|RPS6KA1|RPS6KA3|RPS20|TSC2|GPRC5A|MVP|PNKP|F11R|WNK1|AKT1S1|PPP1R9B|HEXIM2	-1.9	Phosphoproteome_Stukalov_A549-ACE2_24h_Up
Reactome Gene Sets	6	R-HSA-375165	NCAM signaling for neurite out-growth		-3.4	8	5.6	30182	63	300	5	1.7	0.74	4684|5594|5747|6654|6711	NCAM1|MAPK1|PTK2|SOS1|SPTBN1	-1.9	Phosphoproteome_Stukalov_A549-ACE2_24h_Up
GO Biological Processes	19	GO:0000375	RNA splicing, via transesterification reactions	19_GO:0008152 metabolic process	-3.4	3.7	4.5	30182	271	300	10	3.3	1	3178|3187|9169|10250|10465|11218|22913|23524|51747|79833	HNRNPA1|HNRNPH1|SCAF11|SRRM1|PPIH|DDX20|RALY|SRRM2|LUC7L3|GEMIN6	-1.9	Phosphoproteome_Stukalov_A549-ACE2_24h_Up
KEGG Pathway	24	hsa05208	Chemical carcinogenesis - reactive oxygen species		-3.4	4.1	4.6	30182	223	300	9	3	0.98	1956|5587|5594|5599|5605|5747|6654|8644|25865	EGFR|PRKD1|MAPK1|MAPK8|MAP2K2|PTK2|SOS1|AKR1C3|PRKD2	-1.9	Phosphoproteome_Stukalov_A549-ACE2_24h_Up
GO Biological Processes	19	GO:0043547	positive regulation of GTPase activity	19_GO:0065007 biological regulation	-3.4	3.7	4.5	30182	272	300	10	3.3	1	4763|6654|7249|9779|10928|23102|23513|26000|50848|85440	NF1|SOS1|TSC2|TBC1D5|RALBP1|TBC1D2B|SCRIB|TBC1D10B|F11R|DOCK7	-1.9	Phosphoproteome_Stukalov_A549-ACE2_24h_Up
GO Biological Processes	19	GO:0009792	embryo development ending in birth or egg hatching	19_GO:0032502 developmental process	-3.4	2.6	4.1	30182	670	300	17	5.7	1.3	1627|1956|3726|4082|4678|4763|4848|4904|5594|7249|8531|8915|9782|10155|23513|28982|253260	DBN1|EGFR|JUNB|MARCKS|NASP|NF1|CNOT2|YBX1|MAPK1|TSC2|YBX3|BCL10|MATR3|TRIM28|SCRIB|FLVCR1|RICTOR	-1.9	Phosphoproteome_Stukalov_A549-ACE2_24h_Up
GO Biological Processes	19	GO:0035196	miRNA processing	19_GO:0048519 negative regulation of biological process	-3.4	11	6.1	30182	36	300	4	1.3	0.66	103|1654|4086|29102	ADAR|DDX3X|SMAD1|DROSHA	-1.9	Phosphoproteome_Stukalov_A549-ACE2_24h_Up
Reactome Gene Sets	6	R-HSA-5663213	RHO GTPases Activate WASPs and WAVEs		-3.4	11	6.1	30182	36	300	4	1.3	0.66	60|71|5594|5747	ACTB|ACTG1|MAPK1|PTK2	-1.9	Phosphoproteome_Stukalov_A549-ACE2_24h_Up
Reactome Gene Sets	6	R-HSA-6802948	Signaling by high-kinase activity BRAF mutants		-3.4	11	6.1	30182	36	300	4	1.3	0.66	60|71|5594|5605	ACTB|ACTG1|MAPK1|MAP2K2	-1.9	Phosphoproteome_Stukalov_A549-ACE2_24h_Up
GO Biological Processes	19	GO:0030099	myeloid cell differentiation	19_GO:0032502 developmental process	-3.4	3.7	4.5	30182	273	300	10	3.3	1	103|2194|3726|4763|5926|6194|6522|7994|22985|28982	ADAR|FASN|JUNB|NF1|ARID4A|RPS6|SLC4A2|KAT6A|ACIN1|FLVCR1	-1.9	Phosphoproteome_Stukalov_A549-ACE2_24h_Up
GO Biological Processes	19	GO:0038127	ERBB signaling pathway	19_GO:0023052 signaling	-3.4	7.9	5.5	30182	64	300	5	1.7	0.74	1956|5594|5747|6654|9961	EGFR|MAPK1|PTK2|SOS1|MVP	-1.9	Phosphoproteome_Stukalov_A549-ACE2_24h_Up
GO Biological Processes	19	GO:0048524	positive regulation of viral process	19_GO:0016032 viral process	-3.4	7.9	5.5	30182	64	300	5	1.7	0.74	103|1654|9217|10465|23367	ADAR|DDX3X|VAPB|PPIH|LARP1	-1.9	Phosphoproteome_Stukalov_A549-ACE2_24h_Up
Reactome Gene Sets	6	R-HSA-421270	Cell-cell junction organization		-3.4	7.9	5.5	30182	64	300	5	1.7	0.74	60|71|5817|50848|56288	ACTB|ACTG1|PVR|F11R|PARD3	-1.9	Phosphoproteome_Stukalov_A549-ACE2_24h_Up
GO Biological Processes	19	GO:0006406	mRNA export from nucleus	19_GO:0051179 localization	-3.4	7.9	5.5	30182	64	300	5	1.7	0.74	4927|7175|8021|8888|55677	NUP88|TPR|NUP214|MCM3AP|IWS1	-1.9	Phosphoproteome_Stukalov_A549-ACE2_24h_Up
GO Biological Processes	19	GO:0001894	tissue homeostasis	19_GO:0042592 homeostatic process	-3.3	4	4.6	30182	225	300	9	3	0.98	60|71|3315|7082|9414|50848|51599|445582|728378	ACTB|ACTG1|HSPB1|TJP1|TJP2|F11R|LSR|POTEE|POTEF	-1.9	Phosphoproteome_Stukalov_A549-ACE2_24h_Up
GO Biological Processes	19	GO:0060249	anatomical structure homeostasis	19_GO:0042592 homeostatic process	-3.3	4	4.6	30182	225	300	9	3	0.98	60|71|3315|7082|9414|50848|51599|445582|728378	ACTB|ACTG1|HSPB1|TJP1|TJP2|F11R|LSR|POTEE|POTEF	-1.9	Phosphoproteome_Stukalov_A549-ACE2_24h_Up
KEGG Pathway	24	hsa05231	Choline metabolism in cancer		-3.3	6.2	5.1	30182	98	300	6	2	0.81	1956|5594|5599|5605|6654|7249	EGFR|MAPK1|MAPK8|MAP2K2|SOS1|TSC2	-1.9	Phosphoproteome_Stukalov_A549-ACE2_24h_Up
KEGG Pathway	24	hsa01522	Endocrine resistance		-3.3	6.2	5.1	30182	98	300	6	2	0.81	1956|5594|5599|5605|5747|6654	EGFR|MAPK1|MAPK8|MAP2K2|PTK2|SOS1	-1.9	Phosphoproteome_Stukalov_A549-ACE2_24h_Up
Reactome Gene Sets	6	R-HSA-4420097	VEGFA-VEGFR2 Pathway		-3.3	6.1	5.1	30182	99	300	6	2	0.81	60|71|3315|5058|5747|253260	ACTB|ACTG1|HSPB1|PAK1|PTK2|RICTOR	-1.9	Phosphoproteome_Stukalov_A549-ACE2_24h_Up
GO Biological Processes	19	GO:0034728	nucleosome organization	19_GO:0009987 cellular process	-3.3	5.1	4.8	30182	138	300	7	2.3	0.87	546|3159|4678|6601|7994|8888|196528	ATRX|HMGA1|NASP|SMARCC2|KAT6A|MCM3AP|ARID2	-1.9	Phosphoproteome_Stukalov_A549-ACE2_24h_Up
Reactome Gene Sets	6	R-HSA-211000	Gene Silencing by RNA		-3.3	5.1	4.8	30182	138	300	7	2.3	0.87	4927|4928|7175|8021|9972|23511|29102	NUP88|NUP98|TPR|NUP214|NUP153|NUP188|DROSHA	-1.9	Phosphoproteome_Stukalov_A549-ACE2_24h_Up
KEGG Pathway	24	hsa04915	Estrogen signaling pathway		-3.3	5.1	4.8	30182	138	300	7	2.3	0.87	1956|2289|3875|5331|5594|5605|6654	EGFR|FKBP5|KRT18|PLCB3|MAPK1|MAP2K2|SOS1	-1.9	Phosphoproteome_Stukalov_A549-ACE2_24h_Up
GO Biological Processes	19	GO:1904358	positive regulation of telomere maintenance via telomere lengthening	19_GO:0048518 positive regulation of biological process	-3.3	11	6	30182	37	300	4	1.3	0.66	3178|4216|5594|11284	HNRNPA1|MAP3K4|MAPK1|PNKP	-1.9	Phosphoproteome_Stukalov_A549-ACE2_24h_Up
GO Biological Processes	19	GO:1903146	regulation of autophagy of mitochondrion	19_GO:0008152 metabolic process	-3.3	11	6	30182	37	300	4	1.3	0.66	2017|3064|7249|57602	CTTN|HTT|TSC2|USP36	-1.9	Phosphoproteome_Stukalov_A549-ACE2_24h_Up
Canonical Pathways	11	M228	PID SMAD2 3PATHWAY		-3.3	19	7.2	30182	16	300	3	1	0.57	5594|8021|9972	MAPK1|NUP214|NUP153	-1.9	Phosphoproteome_Stukalov_A549-ACE2_24h_Up
GO Biological Processes	19	GO:0042326	negative regulation of phosphorylation	19_GO:0048519 negative regulation of biological process	-3.3	3.2	4.2	30182	383	300	12	4	1.1	103|3315|4763|7249|9043|9052|9961|11137|28964|56288|84335|124790	ADAR|HSPB1|NF1|TSC2|SPAG9|GPRC5A|MVP|PWP1|GIT1|PARD3|AKT1S1|HEXIM2	-1.9	Phosphoproteome_Stukalov_A549-ACE2_24h_Up
GO Biological Processes	19	GO:0051348	negative regulation of transferase activity	19_GO:0065007 biological regulation	-3.3	3.6	4.4	30182	279	300	10	3.3	1	103|3315|4763|6224|7249|9052|9961|11284|84335|124790	ADAR|HSPB1|NF1|RPS20|TSC2|GPRC5A|MVP|PNKP|AKT1S1|HEXIM2	-1.9	Phosphoproteome_Stukalov_A549-ACE2_24h_Up
GO Biological Processes	19	GO:0008584	male gonad development	19_GO:0022414 reproductive process	-3.3	5	4.8	30182	140	300	7	2.3	0.87	546|4678|5926|7110|8531|8644|9667	ATRX|NASP|ARID4A|TMF1|YBX3|AKR1C3|SAFB2	-1.9	Phosphoproteome_Stukalov_A549-ACE2_24h_Up
GO Biological Processes	19	GO:0031331	positive regulation of cellular catabolic process	19_GO:0048518 positive regulation of biological process	-3.3	3	4.2	30182	441	300	13	4.3	1.2	3064|4848|4898|5049|5587|5747|6449|6613|7249|23367|25782|79066|196513	HTT|CNOT2|NRDC|PAFAH1B2|PRKD1|PTK2|SGTA|SUMO2|TSC2|LARP1|RAB3GAP2|METTL16|DCP1B	-1.9	Phosphoproteome_Stukalov_A549-ACE2_24h_Up
Canonical Pathways	11	M241	PID RAC1 REG PATHWAY		-3.3	11	5.9	30182	38	300	4	1.3	0.66	392|6654|9181|10928	ARHGAP1|SOS1|ARHGEF2|RALBP1	-1.8	Phosphoproteome_Stukalov_A549-ACE2_24h_Up
KEGG Pathway	24	hsa04140	Autophagy - animal		-3.3	5	4.8	30182	141	300	7	2.3	0.87	5594|5599|5605|7249|8878|79065|84335	MAPK1|MAPK8|MAP2K2|TSC2|SQSTM1|ATG9A|AKT1S1	-1.8	Phosphoproteome_Stukalov_A549-ACE2_24h_Up
GO Biological Processes	19	GO:0046546	development of primary male sexual characteristics	19_GO:0022414 reproductive process	-3.3	5	4.8	30182	141	300	7	2.3	0.87	546|4678|5926|7110|8531|8644|9667	ATRX|NASP|ARID4A|TMF1|YBX3|AKR1C3|SAFB2	-1.8	Phosphoproteome_Stukalov_A549-ACE2_24h_Up
KEGG Pathway	24	hsa04720	Long-term potentiation		-3.3	7.5	5.3	30182	67	300	5	1.7	0.74	5331|5594|5605|6195|6197	PLCB3|MAPK1|MAP2K2|RPS6KA1|RPS6KA3	-1.8	Phosphoproteome_Stukalov_A549-ACE2_24h_Up
KEGG Pathway	24	hsa04714	Thermogenesis		-3.3	3.9	4.4	30182	232	300	9	3	0.98	60|71|6194|6195|6197|6601|6654|7249|84335	ACTB|ACTG1|RPS6|RPS6KA1|RPS6KA3|SMARCC2|SOS1|TSC2|AKT1S1	-1.8	Phosphoproteome_Stukalov_A549-ACE2_24h_Up
GO Biological Processes	19	GO:1904377	positive regulation of protein localization to cell periphery	19_GO:0051179 localization	-3.2	7.4	5.3	30182	68	300	5	1.7	0.74	1956|4926|6711|8878|84687	EGFR|NUMA1|SPTBN1|SQSTM1|PPP1R9B	-1.8	Phosphoproteome_Stukalov_A549-ACE2_24h_Up
Reactome Gene Sets	6	R-HSA-5693571	Nonhomologous End-Joining (NHEJ)		-3.2	7.4	5.3	30182	68	300	5	1.7	0.74	2547|8924|9656|51720|55183	XRCC6|HERC2|MDC1|UIMC1|RIF1	-1.8	Phosphoproteome_Stukalov_A549-ACE2_24h_Up
GO Biological Processes	19	GO:0007167	enzyme-linked receptor protein signaling pathway	19_GO:0023052 signaling	-3.2	2.6	4	30182	626	300	16	5.3	1.3	1956|3315|4086|5058|5587|5594|5605|5747|6654|6711|7249|7791|9961|25865|28964|84335	EGFR|HSPB1|SMAD1|PAK1|PRKD1|MAPK1|MAP2K2|PTK2|SOS1|SPTBN1|TSC2|ZYX|MVP|PRKD2|GIT1|AKT1S1	-1.8	Phosphoproteome_Stukalov_A549-ACE2_24h_Up
GO Biological Processes	19	GO:0007030	Golgi organization	19_GO:0009987 cellular process	-3.2	4.9	4.7	30182	143	300	7	2.3	0.87	3064|5587|8729|9382|23332|26003|55361	HTT|PRKD1|GBF1|COG1|CLASP1|GORASP2|PI4K2A	-1.8	Phosphoproteome_Stukalov_A549-ACE2_24h_Up
GO Biological Processes	19	GO:1903900	regulation of viral life cycle	19_GO:0016032 viral process	-3.2	4.9	4.7	30182	143	300	7	2.3	0.87	103|1654|9217|10155|10465|22880|23367	ADAR|DDX3X|VAPB|TRIM28|PPIH|MORC2|LARP1	-1.8	Phosphoproteome_Stukalov_A549-ACE2_24h_Up
GO Biological Processes	19	GO:0033135	regulation of peptidyl-serine phosphorylation	19_GO:0008152 metabolic process	-3.2	4.9	4.7	30182	143	300	7	2.3	0.87	1956|5058|5587|11137|25865|85440|253260	EGFR|PAK1|PRKD1|PWP1|PRKD2|DOCK7|RICTOR	-1.8	Phosphoproteome_Stukalov_A549-ACE2_24h_Up
GO Biological Processes	19	GO:1903358	regulation of Golgi organization	19_GO:0050789 regulation of biological process	-3.2	18	6.9	30182	17	300	3	1	0.57	5594|5605|23271	MAPK1|MAP2K2|CAMSAP2	-1.8	Phosphoproteome_Stukalov_A549-ACE2_24h_Up
GO Biological Processes	19	GO:0010763	positive regulation of fibroblast migration	19_GO:0040011 locomotion	-3.2	18	6.9	30182	17	300	3	1	0.57	59|5747|9590	ACTA2|PTK2|AKAP12	-1.8	Phosphoproteome_Stukalov_A549-ACE2_24h_Up
GO Biological Processes	19	GO:1904355	positive regulation of telomere capping	19_GO:0048518 positive regulation of biological process	-3.2	18	6.9	30182	17	300	3	1	0.57	4216|5594|11284	MAP3K4|MAPK1|PNKP	-1.8	Phosphoproteome_Stukalov_A549-ACE2_24h_Up
Canonical Pathways	11	M82	PID RET PATHWAY		-3.2	10	5.8	30182	39	300	4	1.3	0.66	5594|5599|5747|6654	MAPK1|MAPK8|PTK2|SOS1	-1.8	Phosphoproteome_Stukalov_A549-ACE2_24h_Up
GO Biological Processes	19	GO:0031111	negative regulation of microtubule polymerization or depolymerization	19_GO:0048519 negative regulation of biological process	-3.2	10	5.8	30182	39	300	4	1.3	0.66	4131|9181|23271|23332	MAP1B|ARHGEF2|CAMSAP2|CLASP1	-1.8	Phosphoproteome_Stukalov_A549-ACE2_24h_Up
GO Biological Processes	19	GO:0006417	regulation of translation	19_GO:0008152 metabolic process	-3.2	2.8	4.1	30182	506	300	14	4.7	1.2	16|1654|3315|4848|4904|6195|6197|7175|8531|9669|23367|51087|79066|196513	AARS1|DDX3X|HSPB1|CNOT2|YBX1|RPS6KA1|RPS6KA3|TPR|YBX3|EIF5B|LARP1|YBX2|METTL16|DCP1B	-1.8	Phosphoproteome_Stukalov_A549-ACE2_24h_Up
GO Biological Processes	19	GO:0110020	regulation of actomyosin structure organization	19_GO:0050789 regulation of biological process	-3.2	5.8	4.9	30182	104	300	6	2	0.81	71|5058|7082|23332|50848|55604	ACTG1|PAK1|TJP1|CLASP1|F11R|CARMIL1	-1.8	Phosphoproteome_Stukalov_A549-ACE2_24h_Up
GO Biological Processes	19	GO:0033045	regulation of sister chromatid segregation	19_GO:0050789 regulation of biological process	-3.2	5.8	4.9	30182	104	300	6	2	0.81	60|4926|6601|7175|51143|196528	ACTB|NUMA1|SMARCC2|TPR|DYNC1LI1|ARID2	-1.8	Phosphoproteome_Stukalov_A549-ACE2_24h_Up
KEGG Pathway	24	hsa04660	T cell receptor signaling pathway		-3.2	5.8	4.9	30182	104	300	6	2	0.81	5058|5594|5599|5605|6654|8915	PAK1|MAPK1|MAPK8|MAP2K2|SOS1|BCL10	-1.8	Phosphoproteome_Stukalov_A549-ACE2_24h_Up
Reactome Gene Sets	6	R-HSA-68882	Mitotic Anaphase		-3.2	3.8	4.4	30182	236	300	9	3	0.98	4000|4928|5707|9126|9491|23047|23332|23511|51143	LMNA|NUP98|PSMD1|SMC3|PSMF1|PDS5B|CLASP1|NUP188|DYNC1LI1	-1.8	Phosphoproteome_Stukalov_A549-ACE2_24h_Up
Reactome Gene Sets	6	R-HSA-2555396	Mitotic Metaphase and Anaphase		-3.2	3.8	4.4	30182	237	300	9	3	0.98	4000|4928|5707|9126|9491|23047|23332|23511|51143	LMNA|NUP98|PSMD1|SMC3|PSMF1|PDS5B|CLASP1|NUP188|DYNC1LI1	-1.8	Phosphoproteome_Stukalov_A549-ACE2_24h_Up
Reactome Gene Sets	6	R-HSA-5674135	MAP2K and MAPK activation		-3.2	10	5.7	30182	40	300	4	1.3	0.66	60|71|5594|5605	ACTB|ACTG1|MAPK1|MAP2K2	-1.8	Phosphoproteome_Stukalov_A549-ACE2_24h_Up
GO Biological Processes	19	GO:0010762	regulation of fibroblast migration	19_GO:0040011 locomotion	-3.2	10	5.7	30182	40	300	4	1.3	0.66	59|5747|9368|9590	ACTA2|PTK2|NHERF1|AKAP12	-1.8	Phosphoproteome_Stukalov_A549-ACE2_24h_Up
GO Biological Processes	19	GO:0001933	negative regulation of protein phosphorylation	19_GO:0048519 negative regulation of biological process	-3.2	3.2	4.2	30182	341	300	11	3.7	1.1	103|3315|4763|7249|9043|9052|9961|11137|56288|84335|124790	ADAR|HSPB1|NF1|TSC2|SPAG9|GPRC5A|MVP|PWP1|PARD3|AKT1S1|HEXIM2	-1.8	Phosphoproteome_Stukalov_A549-ACE2_24h_Up
GO Biological Processes	19	GO:0032206	positive regulation of telomere maintenance	19_GO:0048518 positive regulation of biological process	-3.2	7.2	5.2	30182	70	300	5	1.7	0.74	546|3178|4216|5594|11284	ATRX|HNRNPA1|MAP3K4|MAPK1|PNKP	-1.8	Phosphoproteome_Stukalov_A549-ACE2_24h_Up
Reactome Gene Sets	6	R-HSA-5578749	Transcriptional regulation by small RNAs		-3.2	5.7	4.9	30182	106	300	6	2	0.81	4927|4928|7175|8021|9972|23511	NUP88|NUP98|TPR|NUP214|NUP153|NUP188	-1.8	Phosphoproteome_Stukalov_A549-ACE2_24h_Up
Reactome Gene Sets	6	R-HSA-446353	Cell-extracellular matrix interactions		-3.1	17	6.7	30182	18	300	3	1	0.57	60|71|55742	ACTB|ACTG1|PARVA	-1.8	Phosphoproteome_Stukalov_A549-ACE2_24h_Up
GO Biological Processes	19	GO:0043555	regulation of translation in response to stress	19_GO:0050896 response to stimulus	-3.1	17	6.7	30182	18	300	3	1	0.57	1654|6195|6197	DDX3X|RPS6KA1|RPS6KA3	-1.8	Phosphoproteome_Stukalov_A549-ACE2_24h_Up
GO Biological Processes	19	GO:0031532	actin cytoskeleton reorganization	19_GO:0009987 cellular process	-3.1	7.1	5.1	30182	71	300	5	1.7	0.74	2017|5058|8476|55742|253260	CTTN|PAK1|CDC42BPA|PARVA|RICTOR	-1.7	Phosphoproteome_Stukalov_A549-ACE2_24h_Up
GO Biological Processes	19	GO:1902275	regulation of chromatin organization	19_GO:0050789 regulation of biological process	-3.1	9.8	5.7	30182	41	300	4	1.3	0.66	1786|7175|10155|22880	DNMT1|TPR|TRIM28|MORC2	-1.7	Phosphoproteome_Stukalov_A549-ACE2_24h_Up
GO Biological Processes	19	GO:0046718	viral entry into host cell	19_GO:0016032 viral process	-3.1	5.6	4.8	30182	108	300	6	2	0.81	1956|4684|5817|9972|50848|200576	EGFR|NCAM1|PVR|NUP153|F11R|PIKFYVE	-1.7	Phosphoproteome_Stukalov_A549-ACE2_24h_Up
GO Biological Processes	19	GO:0032231	regulation of actin filament bundle assembly	19_GO:0050789 regulation of biological process	-3.1	5.6	4.8	30182	108	300	6	2	0.81	71|5058|7082|23332|50848|55604	ACTG1|PAK1|TJP1|CLASP1|F11R|CARMIL1	-1.7	Phosphoproteome_Stukalov_A549-ACE2_24h_Up
Reactome Gene Sets	6	R-HSA-194138	Signaling by VEGF		-3.1	5.6	4.8	30182	108	300	6	2	0.81	60|71|3315|5058|5747|253260	ACTB|ACTG1|HSPB1|PAK1|PTK2|RICTOR	-1.7	Phosphoproteome_Stukalov_A549-ACE2_24h_Up
GO Biological Processes	19	GO:2000036	regulation of stem cell population maintenance	19_GO:0032502 developmental process	-3.1	7	5.1	30182	72	300	5	1.7	0.74	60|4848|5926|23091|79685	ACTB|CNOT2|ARID4A|ZC3H13|SAP30L	-1.7	Phosphoproteome_Stukalov_A549-ACE2_24h_Up
KEGG Pathway	24	hsa05223	Non-small cell lung cancer		-3.1	7	5.1	30182	72	300	5	1.7	0.74	1956|5594|5605|6654|27436	EGFR|MAPK1|MAP2K2|SOS1|EML4	-1.7	Phosphoproteome_Stukalov_A549-ACE2_24h_Up
GO Biological Processes	19	GO:0010506	regulation of autophagy	19_GO:0008152 metabolic process	-3.1	3.2	4.1	30182	348	300	11	3.7	1.1	2017|3064|3315|5049|5587|5599|7249|23367|25782|55737|57602	CTTN|HTT|HSPB1|PAFAH1B2|PRKD1|MAPK8|TSC2|LARP1|RAB3GAP2|VPS35|USP36	-1.7	Phosphoproteome_Stukalov_A549-ACE2_24h_Up
Reactome Gene Sets	6	R-HSA-3928662	EPHB-mediated forward signaling		-3.1	9.6	5.6	30182	42	300	4	1.3	0.66	60|71|5058|5747	ACTB|ACTG1|PAK1|PTK2	-1.7	Phosphoproteome_Stukalov_A549-ACE2_24h_Up
Reactome Gene Sets	6	R-HSA-5654738	Signaling by FGFR2		-3.1	6.9	5	30182	73	300	5	1.7	0.74	3178|3187|5594|6654|23543	HNRNPA1|HNRNPH1|MAPK1|SOS1|RBFOX2	-1.7	Phosphoproteome_Stukalov_A549-ACE2_24h_Up
GO Biological Processes	19	GO:0001890	placenta development	19_GO:0032502 developmental process	-3.1	4.7	4.5	30182	151	300	7	2.3	0.87	1956|3726|4216|5594|5747|6194|10155	EGFR|JUNB|MAP3K4|MAPK1|PTK2|RPS6|TRIM28	-1.7	Phosphoproteome_Stukalov_A549-ACE2_24h_Up
GO Biological Processes	19	GO:0044409	entry into host	19_GO:0044419 biological process involved in interspecies interaction between organisms	-3.1	5.5	4.7	30182	110	300	6	2	0.81	1956|4684|5817|9972|50848|200576	EGFR|NCAM1|PVR|NUP153|F11R|PIKFYVE	-1.7	Phosphoproteome_Stukalov_A549-ACE2_24h_Up
Reactome Gene Sets	6	R-HSA-3928664	Ephrin signaling		-3.1	16	6.5	30182	19	300	3	1	0.57	5058|10627|28964	PAK1|MYL12A|GIT1	-1.7	Phosphoproteome_Stukalov_A549-ACE2_24h_Up
GO Biological Processes	19	GO:0090308	regulation of DNA methylation-dependent heterochromatin formation	19_GO:0048519 negative regulation of biological process	-3.1	16	6.5	30182	19	300	3	1	0.57	1786|10155|22880	DNMT1|TRIM28|MORC2	-1.7	Phosphoproteome_Stukalov_A549-ACE2_24h_Up
Reactome Gene Sets	6	R-HSA-9703465	Signaling by FLT3 fusion proteins		-3.1	16	6.5	30182	19	300	3	1	0.57	6654|6711|7750	SOS1|SPTBN1|ZMYM2	-1.7	Phosphoproteome_Stukalov_A549-ACE2_24h_Up
GO Biological Processes	19	GO:0006337	nucleosome disassembly	19_GO:0009987 cellular process	-3.1	16	6.5	30182	19	300	3	1	0.57	3159|6601|196528	HMGA1|SMARCC2|ARID2	-1.7	Phosphoproteome_Stukalov_A549-ACE2_24h_Up
GO Biological Processes	19	GO:0043009	chordate embryonic development	19_GO:0032502 developmental process	-3.1	2.5	3.8	30182	648	300	16	5.3	1.3	1627|1956|3726|4082|4678|4763|4848|4904|5594|7249|8531|8915|9782|10155|23513|28982	DBN1|EGFR|JUNB|MARCKS|NASP|NF1|CNOT2|YBX1|MAPK1|TSC2|YBX3|BCL10|MATR3|TRIM28|SCRIB|FLVCR1	-1.7	Phosphoproteome_Stukalov_A549-ACE2_24h_Up
Reactome Gene Sets	6	R-HSA-9013106	RHOC GTPase cycle		-3.1	6.8	5	30182	74	300	5	1.7	0.74	392|9217|9414|9748|54443	ARHGAP1|VAPB|TJP2|SLK|ANLN	-1.7	Phosphoproteome_Stukalov_A549-ACE2_24h_Up
GO Biological Processes	19	GO:2000573	positive regulation of DNA biosynthetic process	19_GO:0048518 positive regulation of biological process	-3.1	6.8	5	30182	74	300	5	1.7	0.74	3178|4216|5594|11284|25865	HNRNPA1|MAP3K4|MAPK1|PNKP|PRKD2	-1.7	Phosphoproteome_Stukalov_A549-ACE2_24h_Up
Reactome Gene Sets	6	R-HSA-9656223	Signaling by RAF1 mutants		-3.1	9.4	5.5	30182	43	300	4	1.3	0.66	60|71|5594|5605	ACTB|ACTG1|MAPK1|MAP2K2	-1.7	Phosphoproteome_Stukalov_A549-ACE2_24h_Up
GO Biological Processes	19	GO:1903829	positive regulation of protein localization	19_GO:0051179 localization	-3.1	2.8	3.9	30182	467	300	13	4.3	1.2	1956|4926|5587|5599|6711|7175|8878|10075|10155|51574|55737|57602|84687	EGFR|NUMA1|PRKD1|MAPK8|SPTBN1|TPR|SQSTM1|HUWE1|TRIM28|LARP7|VPS35|USP36|PPP1R9B	-1.7	Phosphoproteome_Stukalov_A549-ACE2_24h_Up
GO Biological Processes	19	GO:0031346	positive regulation of cell projection organization	19_GO:0048518 positive regulation of biological process	-3.1	3.1	4	30182	353	300	11	3.7	1.1	1627|3064|4131|4898|5587|5605|23580|54443|55604|64787|162427	DBN1|HTT|MAP1B|NRDC|PRKD1|MAP2K2|CDC42EP4|ANLN|CARMIL1|EPS8L2|RETREG3	-1.7	Phosphoproteome_Stukalov_A549-ACE2_24h_Up
GO Biological Processes	19	GO:0016239	positive regulation of macroautophagy	19_GO:0048518 positive regulation of biological process	-3	6.7	5	30182	75	300	5	1.7	0.74	3064|5049|7249|23367|25782	HTT|PAFAH1B2|TSC2|LARP1|RAB3GAP2	-1.7	Phosphoproteome_Stukalov_A549-ACE2_24h_Up
GO Biological Processes	19	GO:0032103	positive regulation of response to external stimulus	19_GO:0048518 positive regulation of biological process	-3	2.6	3.8	30182	532	300	14	4.7	1.2	1654|2547|3315|5058|5587|5594|5747|5817|6197|8915|9782|10623|25865|65125	DDX3X|XRCC6|HSPB1|PAK1|PRKD1|MAPK1|PTK2|PVR|RPS6KA3|BCL10|MATR3|POLR3C|PRKD2|WNK1	-1.6	Phosphoproteome_Stukalov_A549-ACE2_24h_Up
Reactome Gene Sets	6	R-HSA-204998	Cell death signalling via NRAGE, NRIF and NADE		-3	6.6	4.9	30182	76	300	5	1.7	0.74	2245|5599|6654|8878|9181	FGD1|MAPK8|SOS1|SQSTM1|ARHGEF2	-1.6	Phosphoproteome_Stukalov_A549-ACE2_24h_Up
GO Biological Processes	19	GO:0060008	Sertoli cell differentiation	19_GO:0022414 reproductive process	-3	15	6.3	30182	20	300	3	1	0.57	546|5926|9667	ATRX|ARID4A|SAFB2	-1.6	Phosphoproteome_Stukalov_A549-ACE2_24h_Up
GO Biological Processes	19	GO:1900227	positive regulation of NLRP3 inflammasome complex assembly	19_GO:0048518 positive regulation of biological process	-3	15	6.3	30182	20	300	3	1	0.57	1654|5587|5599	DDX3X|PRKD1|MAPK8	-1.6	Phosphoproteome_Stukalov_A549-ACE2_24h_Up
GO Biological Processes	19	GO:2000112	regulation of cellular macromolecule biosynthetic process	19_GO:0008152 metabolic process	-3	2.5	3.8	30182	594	300	15	5	1.3	16|1654|3315|4848|4904|6195|6197|7175|8531|9669|23367|25782|51087|79066|196513	AARS1|DDX3X|HSPB1|CNOT2|YBX1|RPS6KA1|RPS6KA3|TPR|YBX3|EIF5B|LARP1|RAB3GAP2|YBX2|METTL16|DCP1B	-1.6	Phosphoproteome_Stukalov_A549-ACE2_24h_Up
GO Biological Processes	19	GO:0031668	cellular response to extracellular stimulus	19_GO:0050896 response to stimulus	-3	3.6	4.1	30182	252	300	9	3	0.98	490|3178|5587|5594|5599|8644|10514|84687|253260	ATP2B1|HNRNPA1|PRKD1|MAPK1|MAPK8|AKR1C3|MYBBP1A|PPP1R9B|RICTOR	-1.6	Phosphoproteome_Stukalov_A549-ACE2_24h_Up
Reactome Gene Sets	6	R-HSA-3899300	SUMOylation of transcription cofactors		-3	8.9	5.3	30182	45	300	4	1.3	0.66	6294|6612|6613|10155	SAFB|SUMO3|SUMO2|TRIM28	-1.6	Phosphoproteome_Stukalov_A549-ACE2_24h_Up
Reactome Gene Sets	6	R-HSA-187037	Signaling by NTRK1 (TRKA)		-3	5.2	4.6	30182	115	300	6	2	0.81	3726|5594|5605|6195|6197|6654	JUNB|MAPK1|MAP2K2|RPS6KA1|RPS6KA3|SOS1	-1.6	Phosphoproteome_Stukalov_A549-ACE2_24h_Up
GO Biological Processes	19	GO:0010927	cellular component assembly involved in morphogenesis	19_GO:0032502 developmental process	-3	5.2	4.6	30182	115	300	6	2	0.81	58|70|71|7110|10398|200576	ACTA1|ACTC1|ACTG1|TMF1|MYL9|PIKFYVE	-1.6	Phosphoproteome_Stukalov_A549-ACE2_24h_Up
Reactome Gene Sets	6	R-HSA-9610379	HCMV Late Events		-3	5.2	4.5	30182	116	300	6	2	0.81	4927|4928|7175|8021|9972|23511	NUP88|NUP98|TPR|NUP214|NUP153|NUP188	-1.6	Phosphoproteome_Stukalov_A549-ACE2_24h_Up
GO Biological Processes	19	GO:0070972	protein localization to endoplasmic reticulum	19_GO:0051179 localization	-3	6.4	4.8	30182	78	300	5	1.7	0.74	6449|6747|8729|25782|54557	SGTA|SSR3|GBF1|RAB3GAP2|SGTB	-1.6	Phosphoproteome_Stukalov_A549-ACE2_24h_Up
GO Biological Processes	19	GO:0009896	positive regulation of catabolic process	19_GO:0048518 positive regulation of biological process	-3	2.6	3.8	30182	540	300	14	4.7	1.2	3064|4848|4898|5049|5587|5747|6449|6613|7249|23367|25782|55737|79066|196513	HTT|CNOT2|NRDC|PAFAH1B2|PRKD1|PTK2|SGTA|SUMO2|TSC2|LARP1|RAB3GAP2|VPS35|METTL16|DCP1B	-1.6	Phosphoproteome_Stukalov_A549-ACE2_24h_Up
GO Biological Processes	19	GO:0032986	protein-DNA complex disassembly	19_GO:0009987 cellular process	-2.9	14	6.1	30182	21	300	3	1	0.57	3159|6601|196528	HMGA1|SMARCC2|ARID2	-1.6	Phosphoproteome_Stukalov_A549-ACE2_24h_Up
Reactome Gene Sets	6	R-HSA-416572	Sema4D induced cell migration and growth-cone collapse		-2.9	14	6.1	30182	21	300	3	1	0.57	10398|10627|103910	MYL9|MYL12A|MYL12B	-1.6	Phosphoproteome_Stukalov_A549-ACE2_24h_Up
CORUM	33	CORUM:5614	Emerin complex 32		-2.9	14	6.1	30182	21	300	3	1	0.57	60|6601|10155	ACTB|SMARCC2|TRIM28	-1.6	Phosphoproteome_Stukalov_A549-ACE2_24h_Up
GO Biological Processes	19	GO:0042594	response to starvation	19_GO:0050896 response to stimulus	-2.9	3.9	4.2	30182	207	300	8	2.7	0.93	3178|5587|5594|5599|8644|9779|10514|23367	HNRNPA1|PRKD1|MAPK1|MAPK8|AKR1C3|TBC1D5|MYBBP1A|LARP1	-1.6	Phosphoproteome_Stukalov_A549-ACE2_24h_Up
CORUM	33	CORUM:1181	C complex spliceosome		-2.9	6.4	4.8	30182	79	300	5	1.7	0.74	3178|3187|10250|22913|23524	HNRNPA1|HNRNPH1|SRRM1|RALY|SRRM2	-1.6	Phosphoproteome_Stukalov_A549-ACE2_24h_Up
GO Biological Processes	19	GO:0007051	spindle organization	19_GO:0009987 cellular process	-2.9	4.4	4.3	30182	161	300	7	2.3	0.87	546|4134|4926|9126|23332|55726|126353	ATRX|MAP4|NUMA1|SMC3|CLASP1|INTS13|MISP	-1.6	Phosphoproteome_Stukalov_A549-ACE2_24h_Up
GO Biological Processes	19	GO:0006605	protein targeting	19_GO:0051179 localization	-2.9	3.5	4	30182	259	300	9	3	0.98	3308|5195|6449|6747|9454|54557|56288|56993|200576	HSPA4|PEX14|SGTA|SSR3|HOMER3|SGTB|PARD3|TOMM22|PIKFYVE	-1.6	Phosphoproteome_Stukalov_A549-ACE2_24h_Up
Reactome Gene Sets	6	R-HSA-6802955	Paradoxical activation of RAF signaling by kinase inactive BRAF		-2.9	8.6	5.2	30182	47	300	4	1.3	0.66	60|71|5594|5605	ACTB|ACTG1|MAPK1|MAP2K2	-1.6	Phosphoproteome_Stukalov_A549-ACE2_24h_Up
Reactome Gene Sets	6	R-HSA-6802949	Signaling by RAS mutants		-2.9	8.6	5.2	30182	47	300	4	1.3	0.66	60|71|5594|5605	ACTB|ACTG1|MAPK1|MAP2K2	-1.6	Phosphoproteome_Stukalov_A549-ACE2_24h_Up
Reactome Gene Sets	6	R-HSA-9649948	Signaling downstream of RAS mutants		-2.9	8.6	5.2	30182	47	300	4	1.3	0.66	60|71|5594|5605	ACTB|ACTG1|MAPK1|MAP2K2	-1.6	Phosphoproteome_Stukalov_A549-ACE2_24h_Up
GO Biological Processes	19	GO:0001738	morphogenesis of a polarized epithelium	19_GO:0032502 developmental process	-2.9	8.6	5.2	30182	47	300	4	1.3	0.66	60|71|9368|23513	ACTB|ACTG1|NHERF1|SCRIB	-1.6	Phosphoproteome_Stukalov_A549-ACE2_24h_Up
GO Biological Processes	19	GO:0001885	endothelial cell development	19_GO:0032502 developmental process	-2.9	8.6	5.2	30182	47	300	4	1.3	0.66	2194|7082|9414|50848	FASN|TJP1|TJP2|F11R	-1.6	Phosphoproteome_Stukalov_A549-ACE2_24h_Up
Reactome Gene Sets	6	R-HSA-6802946	Signaling by moderate kinase activity BRAF mutants		-2.9	8.6	5.2	30182	47	300	4	1.3	0.66	60|71|5594|5605	ACTB|ACTG1|MAPK1|MAP2K2	-1.6	Phosphoproteome_Stukalov_A549-ACE2_24h_Up
GO Biological Processes	19	GO:0006897	endocytosis	19_GO:0051179 localization	-2.9	2.8	3.8	30182	425	300	12	4	1.1	2017|5594|7249|10928|22905|23102|23301|23513|28988|55604|85021|200576	CTTN|MAPK1|TSC2|RALBP1|EPN2|TBC1D2B|EHBP1|SCRIB|DBNL|CARMIL1|REPS1|PIKFYVE	-1.6	Phosphoproteome_Stukalov_A549-ACE2_24h_Up
GO Biological Processes	19	GO:0001895	retina homeostasis	19_GO:0042592 homeostatic process	-2.9	6.3	4.7	30182	80	300	5	1.7	0.74	60|71|3315|445582|728378	ACTB|ACTG1|HSPB1|POTEE|POTEF	-1.6	Phosphoproteome_Stukalov_A549-ACE2_24h_Up
KEGG Pathway	24	hsa04722	Neurotrophin signaling pathway		-2.9	5.1	4.5	30182	119	300	6	2	0.81	5594|5599|5605|6195|6197|6654	MAPK1|MAPK8|MAP2K2|RPS6KA1|RPS6KA3|SOS1	-1.6	Phosphoproteome_Stukalov_A549-ACE2_24h_Up
GO Biological Processes	19	GO:0000165	MAPK cascade	19_GO:0023052 signaling	-2.9	3.8	4.1	30182	210	300	8	2.7	0.93	1956|4086|4216|4763|5594|5599|5605|8682	EGFR|SMAD1|MAP3K4|NF1|MAPK1|MAPK8|MAP2K2|PEA15	-1.6	Phosphoproteome_Stukalov_A549-ACE2_24h_Up
GO Biological Processes	19	GO:0045814	negative regulation of gene expression, epigenetic	19_GO:0048519 negative regulation of biological process	-2.9	6.2	4.7	30182	81	300	5	1.7	0.74	546|1786|4000|22880|55183	ATRX|DNMT1|LMNA|MORC2|RIF1	-1.5	Phosphoproteome_Stukalov_A549-ACE2_24h_Up
Reactome Gene Sets	6	R-HSA-1250196	SHC1 events in ERBB2 signaling		-2.9	14	6	30182	22	300	3	1	0.57	1956|5782|6654	EGFR|PTPN12|SOS1	-1.5	Phosphoproteome_Stukalov_A549-ACE2_24h_Up
Reactome Gene Sets	6	R-HSA-198753	ERK/MAPK targets		-2.9	14	6	30182	22	300	3	1	0.57	5594|6195|6197	MAPK1|RPS6KA1|RPS6KA3	-1.5	Phosphoproteome_Stukalov_A549-ACE2_24h_Up
GO Biological Processes	19	GO:0071363	cellular response to growth factor stimulus	19_GO:0050896 response to stimulus	-2.9	2.7	3.7	30182	488	300	13	4.3	1.2	59|1956|3315|4086|4131|5587|5747|5782|6654|7791|25865|84335|84687	ACTA2|EGFR|HSPB1|SMAD1|MAP1B|PRKD1|PTK2|PTPN12|SOS1|ZYX|PRKD2|AKT1S1|PPP1R9B	-1.5	Phosphoproteome_Stukalov_A549-ACE2_24h_Up
GO Biological Processes	19	GO:0046661	male sex differentiation	19_GO:0022414 reproductive process	-2.9	4.3	4.2	30182	164	300	7	2.3	0.87	546|4678|5926|7110|8531|8644|9667	ATRX|NASP|ARID4A|TMF1|YBX3|AKR1C3|SAFB2	-1.5	Phosphoproteome_Stukalov_A549-ACE2_24h_Up
Reactome Gene Sets	6	R-HSA-9658195	Leishmania infection		-2.9	4.3	4.2	30182	164	300	7	2.3	0.87	60|71|5594|5599|5747|10910|79651	ACTB|ACTG1|MAPK1|MAPK8|PTK2|SUGT1|RHBDF2	-1.5	Phosphoproteome_Stukalov_A549-ACE2_24h_Up
GO Biological Processes	19	GO:0030307	positive regulation of cell growth	19_GO:0040007 growth	-2.9	4.3	4.2	30182	164	300	7	2.3	0.87	1654|1956|4131|6195|6197|51616|253260	DDX3X|EGFR|MAP1B|RPS6KA1|RPS6KA3|TAF9B|RICTOR	-1.5	Phosphoproteome_Stukalov_A549-ACE2_24h_Up
GO Biological Processes	19	GO:0045619	regulation of lymphocyte differentiation	19_GO:0002376 immune system process	-2.9	3.8	4.1	30182	212	300	8	2.7	0.93	60|2547|3726|6522|6601|6654|29102|196528	ACTB|XRCC6|JUNB|SLC4A2|SMARCC2|SOS1|DROSHA|ARID2	-1.5	Phosphoproteome_Stukalov_A549-ACE2_24h_Up
GO Biological Processes	19	GO:2000278	regulation of DNA biosynthetic process	19_GO:0008152 metabolic process	-2.9	5	4.4	30182	121	300	6	2	0.81	1602|3178|4216|5594|11284|25865	DACH1|HNRNPA1|MAP3K4|MAPK1|PNKP|PRKD2	-1.5	Phosphoproteome_Stukalov_A549-ACE2_24h_Up
KEGG Pathway	24	hsa04919	Thyroid hormone signaling pathway		-2.9	5	4.4	30182	121	300	6	2	0.81	60|71|5331|5594|5605|7249	ACTB|ACTG1|PLCB3|MAPK1|MAP2K2|TSC2	-1.5	Phosphoproteome_Stukalov_A549-ACE2_24h_Up
Canonical Pathways	11	M115	PID REG GR PATHWAY		-2.9	6.1	4.7	30182	82	300	5	1.7	0.74	2289|5594|5599|6601|6613	FKBP5|MAPK1|MAPK8|SMARCC2|SUMO2	-1.5	Phosphoproteome_Stukalov_A549-ACE2_24h_Up
GO Biological Processes	19	GO:0006446	regulation of translational initiation	19_GO:0008152 metabolic process	-2.9	6.1	4.7	30182	82	300	5	1.7	0.74	1654|3315|7175|9669|23367	DDX3X|HSPB1|TPR|EIF5B|LARP1	-1.5	Phosphoproteome_Stukalov_A549-ACE2_24h_Up
Reactome Gene Sets	6	R-HSA-9006936	Signaling by TGFB family members		-2.8	4.9	4.4	30182	122	300	6	2	0.81	3726|4086|4904|5594|50848|56288	JUNB|SMAD1|YBX1|MAPK1|F11R|PARD3	-1.5	Phosphoproteome_Stukalov_A549-ACE2_24h_Up
GO Biological Processes	19	GO:1901888	regulation of cell junction assembly	19_GO:0050789 regulation of biological process	-2.8	3.8	4.1	30182	214	300	8	2.7	0.93	71|5747|7082|9748|23077|23332|50848|55737	ACTG1|PTK2|TJP1|SLK|MYCBP2|CLASP1|F11R|VPS35	-1.5	Phosphoproteome_Stukalov_A549-ACE2_24h_Up
GO Biological Processes	19	GO:0006282	regulation of DNA repair	19_GO:0050896 response to stimulus	-2.8	3.8	4.1	30182	214	300	8	2.7	0.93	60|1956|6601|10155|11284|51720|55183|196528	ACTB|EGFR|SMARCC2|TRIM28|PNKP|UIMC1|RIF1|ARID2	-1.5	Phosphoproteome_Stukalov_A549-ACE2_24h_Up
GO Biological Processes	19	GO:0030838	positive regulation of actin filament polymerization	19_GO:0048518 positive regulation of biological process	-2.8	8.2	5.1	30182	49	300	4	1.3	0.66	2017|55604|253260|253725	CTTN|CARMIL1|RICTOR|WASHC2C	-1.5	Phosphoproteome_Stukalov_A549-ACE2_24h_Up
Canonical Pathways	11	M92	PID ANGIOPOIETIN RECEPTOR PATHWAY		-2.8	8.2	5.1	30182	49	300	4	1.3	0.66	5058|5594|5599|5747	PAK1|MAPK1|MAPK8|PTK2	-1.5	Phosphoproteome_Stukalov_A549-ACE2_24h_Up
GO Biological Processes	19	GO:0038093	Fc receptor signaling pathway	19_GO:0002376 immune system process	-2.8	8.2	5.1	30182	49	300	4	1.3	0.66	5058|5599|5747|6654	PAK1|MAPK8|PTK2|SOS1	-1.5	Phosphoproteome_Stukalov_A549-ACE2_24h_Up
GO Biological Processes	19	GO:1902105	regulation of leukocyte differentiation	19_GO:0002376 immune system process	-2.8	3.2	3.9	30182	319	300	10	3.3	1	60|2547|3726|4763|6522|6601|6654|22985|29102|196528	ACTB|XRCC6|JUNB|NF1|SLC4A2|SMARCC2|SOS1|ACIN1|DROSHA|ARID2	-1.5	Phosphoproteome_Stukalov_A549-ACE2_24h_Up
GO Biological Processes	19	GO:0009612	response to mechanical stimulus	19_GO:0050896 response to stimulus	-2.8	3.7	4	30182	215	300	8	2.7	0.93	58|71|3064|4131|5599|5747|8915|50848	ACTA1|ACTG1|HTT|MAP1B|MAPK8|PTK2|BCL10|F11R	-1.5	Phosphoproteome_Stukalov_A549-ACE2_24h_Up
Reactome Gene Sets	6	R-HSA-112409	RAF-independent MAPK1/3 activation		-2.8	13	5.8	30182	23	300	3	1	0.57	5594|5605|8682	MAPK1|MAP2K2|PEA15	-1.5	Phosphoproteome_Stukalov_A549-ACE2_24h_Up
GO Biological Processes	19	GO:0007097	nuclear migration	19_GO:0051179 localization	-2.8	13	5.8	30182	23	300	3	1	0.57	4000|9368|85440	LMNA|NHERF1|DOCK7	-1.5	Phosphoproteome_Stukalov_A549-ACE2_24h_Up
Reactome Gene Sets	6	R-HSA-9013418	RHOBTB2 GTPase cycle		-2.8	13	5.8	30182	23	300	3	1	0.57	71|1627|10250	ACTG1|DBN1|SRRM1	-1.5	Phosphoproteome_Stukalov_A549-ACE2_24h_Up
GO Biological Processes	19	GO:0031065	positive regulation of histone deacetylation	19_GO:0048518 positive regulation of biological process	-2.8	13	5.8	30182	23	300	3	1	0.57	5587|10270|25865	PRKD1|AKAP8|PRKD2	-1.5	Phosphoproteome_Stukalov_A549-ACE2_24h_Up
GO Biological Processes	19	GO:0046823	negative regulation of nucleocytoplasmic transport	19_GO:0051179 localization	-2.8	13	5.8	30182	23	300	3	1	0.57	4763|7175|9972	NF1|TPR|NUP153	-1.5	Phosphoproteome_Stukalov_A549-ACE2_24h_Up
GO Biological Processes	19	GO:0043414	macromolecule methylation	19_GO:0008152 metabolic process	-2.8	3.4	3.9	30182	267	300	9	3	0.98	546|1786|4839|5926|9757|10155|23091|51574|79066	ATRX|DNMT1|NOP2|ARID4A|KMT2B|TRIM28|ZC3H13|LARP7|METTL16	-1.5	Phosphoproteome_Stukalov_A549-ACE2_24h_Up
Reactome Gene Sets	6	R-HSA-983231	Factors involved in megakaryocyte development and platelet production		-2.8	4.2	4.2	30182	168	300	7	2.3	0.87	60|3831|8165|55604|64837|80005|85440	ACTB|KLC1|AKAP1|CARMIL1|KLC2|DOCK5|DOCK7	-1.5	Phosphoproteome_Stukalov_A549-ACE2_24h_Up
Reactome Gene Sets	6	R-HSA-5696399	Global Genome Nucleotide Excision Repair (GG-NER)		-2.8	6	4.6	30182	84	300	5	1.7	0.74	60|5887|5981|6612|6613	ACTB|RAD23B|RFC1|SUMO3|SUMO2	-1.5	Phosphoproteome_Stukalov_A549-ACE2_24h_Up
KEGG Pathway	24	hsa05110	Vibrio cholerae infection		-2.8	8	5	30182	50	300	4	1.3	0.66	60|71|7082|9414	ACTB|ACTG1|TJP1|TJP2	-1.5	Phosphoproteome_Stukalov_A549-ACE2_24h_Up
GO Biological Processes	19	GO:0008544	epidermis development	19_GO:0032502 developmental process	-2.8	3.1	3.8	30182	322	300	10	3.3	1	1956|2317|4763|4904|6654|8644|9368|23022|23513|51599	EGFR|FLNB|NF1|YBX1|SOS1|AKR1C3|NHERF1|PALLD|SCRIB|LSR	-1.5	Phosphoproteome_Stukalov_A549-ACE2_24h_Up
GO Biological Processes	19	GO:0031647	regulation of protein stability	19_GO:0065007 biological regulation	-2.8	3.1	3.8	30182	322	300	10	3.3	1	3064|4000|5594|10910|51616|55737|55742|57602|58525|79657	HTT|LMNA|MAPK1|SUGT1|TAF9B|VPS35|PARVA|USP36|WIZ|RPAP3	-1.5	Phosphoproteome_Stukalov_A549-ACE2_24h_Up
GO Biological Processes	19	GO:0006469	negative regulation of protein kinase activity	19_GO:0048519 negative regulation of biological process	-2.8	3.7	4	30182	217	300	8	2.7	0.93	103|3315|4763|7249|9052|9961|84335|124790	ADAR|HSPB1|NF1|TSC2|GPRC5A|MVP|AKT1S1|HEXIM2	-1.5	Phosphoproteome_Stukalov_A549-ACE2_24h_Up
Reactome Gene Sets	6	R-HSA-9754678	SARS-CoV-2 modulates host translation machinery		-2.8	7.9	4.9	30182	51	300	4	1.3	0.66	6194|6224|11218|79833	RPS6|RPS20|DDX20|GEMIN6	-1.5	Phosphoproteome_Stukalov_A549-ACE2_24h_Up
KEGG Pathway	24	hsa05164	Influenza A		-2.8	4.1	4.1	30182	171	300	7	2.3	0.87	60|71|103|3337|4928|5594|5605	ACTB|ACTG1|ADAR|DNAJB1|NUP98|MAPK1|MAP2K2	-1.5	Phosphoproteome_Stukalov_A549-ACE2_24h_Up
GO Biological Processes	19	GO:0051650	establishment of vesicle localization	19_GO:0051179 localization	-2.8	4.1	4.1	30182	171	300	7	2.3	0.87	3064|8729|23332|23513|26115|63971|79083	HTT|GBF1|CLASP1|SCRIB|TANC2|KIF13A|MLPH	-1.5	Phosphoproteome_Stukalov_A549-ACE2_24h_Up
GO Biological Processes	19	GO:2001026	regulation of endothelial cell chemotaxis	19_GO:0040011 locomotion	-2.8	13	5.7	30182	24	300	3	1	0.57	3315|5587|25865	HSPB1|PRKD1|PRKD2	-1.5	Phosphoproteome_Stukalov_A549-ACE2_24h_Up
GO Biological Processes	19	GO:0038084	vascular endothelial growth factor signaling pathway	19_GO:0023052 signaling	-2.8	13	5.7	30182	24	300	3	1	0.57	3315|5587|25865	HSPB1|PRKD1|PRKD2	-1.5	Phosphoproteome_Stukalov_A549-ACE2_24h_Up
GO Biological Processes	19	GO:0140747	regulation of ncRNA transcription	19_GO:0008152 metabolic process	-2.8	13	5.7	30182	24	300	3	1	0.57	546|11137|51574	ATRX|PWP1|LARP7	-1.5	Phosphoproteome_Stukalov_A549-ACE2_24h_Up
Reactome Gene Sets	6	R-HSA-9634638	Estrogen-dependent nuclear events downstream of ESR-membrane signaling		-2.8	13	5.7	30182	24	300	3	1	0.57	1956|5594|5747	EGFR|MAPK1|PTK2	-1.5	Phosphoproteome_Stukalov_A549-ACE2_24h_Up
Canonical Pathways	11	M268	PID S1P S1P2 PATHWAY		-2.8	13	5.7	30182	24	300	3	1	0.57	5058|5594|5599	PAK1|MAPK1|MAPK8	-1.5	Phosphoproteome_Stukalov_A549-ACE2_24h_Up
Reactome Gene Sets	6	R-HSA-2029480	Fcgamma receptor (FCGR) dependent phagocytosis		-2.8	5.8	4.5	30182	86	300	5	1.7	0.74	60|71|5058|5594|5747	ACTB|ACTG1|PAK1|MAPK1|PTK2	-1.5	Phosphoproteome_Stukalov_A549-ACE2_24h_Up
KEGG Pathway	24	hsa05210	Colorectal cancer		-2.8	5.8	4.5	30182	86	300	5	1.7	0.74	1956|5594|5599|5605|6654	EGFR|MAPK1|MAPK8|MAP2K2|SOS1	-1.5	Phosphoproteome_Stukalov_A549-ACE2_24h_Up
GO Biological Processes	19	GO:2000781	positive regulation of double-strand break repair	19_GO:0048518 positive regulation of biological process	-2.8	5.8	4.5	30182	86	300	5	1.7	0.74	60|6601|11284|55183|196528	ACTB|SMARCC2|PNKP|RIF1|ARID2	-1.5	Phosphoproteome_Stukalov_A549-ACE2_24h_Up
GO Biological Processes	19	GO:0007276	gamete generation	19_GO:0022414 reproductive process	-2.8	2.3	3.5	30182	760	300	17	5.7	1.3	546|1654|4086|5049|5887|5926|6194|6522|6654|7110|8531|8924|11218|26003|51087|51574|151195	ATRX|DDX3X|SMAD1|PAFAH1B2|RAD23B|ARID4A|RPS6|SLC4A2|SOS1|TMF1|YBX3|HERC2|DDX20|GORASP2|YBX2|LARP7|CCNYL1	-1.5	Phosphoproteome_Stukalov_A549-ACE2_24h_Up
GO Biological Processes	19	GO:0098876	vesicle-mediated transport to the plasma membrane	19_GO:0051179 localization	-2.8	4.8	4.2	30182	127	300	6	2	0.81	3875|6711|23513|55737|63971|253725	KRT18|SPTBN1|SCRIB|VPS35|KIF13A|WASHC2C	-1.5	Phosphoproteome_Stukalov_A549-ACE2_24h_Up
GO Biological Processes	19	GO:0031669	cellular response to nutrient levels	19_GO:0050896 response to stimulus	-2.8	3.6	3.9	30182	221	300	8	2.7	0.93	490|3178|5587|5594|5599|8644|10514|253260	ATP2B1|HNRNPA1|PRKD1|MAPK1|MAPK8|AKR1C3|MYBBP1A|RICTOR	-1.5	Phosphoproteome_Stukalov_A549-ACE2_24h_Up
GO Biological Processes	19	GO:1990928	response to amino acid starvation	19_GO:0050896 response to stimulus	-2.7	7.7	4.9	30182	52	300	4	1.3	0.66	5587|5594|5599|23367	PRKD1|MAPK1|MAPK8|LARP1	-1.5	Phosphoproteome_Stukalov_A549-ACE2_24h_Up
GO Biological Processes	19	GO:0072599	establishment of protein localization to endoplasmic reticulum	19_GO:0051179 localization	-2.7	7.7	4.9	30182	52	300	4	1.3	0.66	6449|6747|25782|54557	SGTA|SSR3|RAB3GAP2|SGTB	-1.5	Phosphoproteome_Stukalov_A549-ACE2_24h_Up
Reactome Gene Sets	6	R-HSA-190236	Signaling by FGFR		-2.7	5.8	4.5	30182	87	300	5	1.7	0.74	3178|3187|5594|6654|23543	HNRNPA1|HNRNPH1|MAPK1|SOS1|RBFOX2	-1.5	Phosphoproteome_Stukalov_A549-ACE2_24h_Up
GO Biological Processes	19	GO:0034243	regulation of transcription elongation by RNA polymerase II	19_GO:0008152 metabolic process	-2.7	5.8	4.5	30182	87	300	5	1.7	0.74	7936|26512|51574|51755|55726	NELFE|INTS6|LARP7|CDK12|INTS13	-1.5	Phosphoproteome_Stukalov_A549-ACE2_24h_Up
GO Biological Processes	19	GO:0062197	cellular response to chemical stress	19_GO:0050896 response to stimulus	-2.7	3.3	3.8	30182	274	300	9	3	0.98	1654|1956|5587|5594|5599|8531|8644|9181|387082	DDX3X|EGFR|PRKD1|MAPK1|MAPK8|YBX3|AKR1C3|ARHGEF2|SUMO4	-1.5	Phosphoproteome_Stukalov_A549-ACE2_24h_Up
GO Biological Processes	19	GO:0010810	regulation of cell-substrate adhesion	19_GO:0050789 regulation of biological process	-2.7	3.6	3.9	30182	222	300	8	2.7	0.93	71|4763|5747|9748|23332|55604|80005|253725	ACTG1|NF1|PTK2|SLK|CLASP1|CARMIL1|DOCK5|WASHC2C	-1.5	Phosphoproteome_Stukalov_A549-ACE2_24h_Up
GO Biological Processes	19	GO:0034329	cell junction assembly	19_GO:0009987 cellular process	-2.7	3.3	3.8	30182	275	300	9	3	0.98	60|71|119|2017|4131|7082|28988|51599|56288	ACTB|ACTG1|ADD2|CTTN|MAP1B|TJP1|DBNL|LSR|PARD3	-1.4	Phosphoproteome_Stukalov_A549-ACE2_24h_Up
GO Biological Processes	19	GO:0035304	regulation of protein dephosphorylation	19_GO:0008152 metabolic process	-2.7	5.7	4.4	30182	88	300	5	1.7	0.74	2029|3064|4659|5510|84687	ENSA|HTT|PPP1R12A|PPP1R7|PPP1R9B	-1.4	Phosphoproteome_Stukalov_A549-ACE2_24h_Up
Reactome Gene Sets	6	R-HSA-9013404	RAC2 GTPase cycle		-2.7	5.7	4.4	30182	88	300	5	1.7	0.74	392|5058|9217|23580|28964	ARHGAP1|PAK1|VAPB|CDC42EP4|GIT1	-1.4	Phosphoproteome_Stukalov_A549-ACE2_24h_Up
GO Biological Processes	19	GO:0034248	regulation of amide metabolic process	19_GO:0008152 metabolic process	-2.7	2.5	3.5	30182	571	300	14	4.7	1.2	16|1654|3315|4848|4904|6195|6197|7175|8531|9669|23367|51087|79066|196513	AARS1|DDX3X|HSPB1|CNOT2|YBX1|RPS6KA1|RPS6KA3|TPR|YBX3|EIF5B|LARP1|YBX2|METTL16|DCP1B	-1.4	Phosphoproteome_Stukalov_A549-ACE2_24h_Up
Canonical Pathways	11	M274	PID LYMPH ANGIOGENESIS PATHWAY		-2.7	12	5.5	30182	25	300	3	1	0.57	5594|6195|6654	MAPK1|RPS6KA1|SOS1	-1.4	Phosphoproteome_Stukalov_A549-ACE2_24h_Up
GO Biological Processes	19	GO:0016601	Rac protein signal transduction	19_GO:0023052 signaling	-2.7	12	5.5	30182	25	300	3	1	0.57	4763|28988|80005	NF1|DBNL|DOCK5	-1.4	Phosphoproteome_Stukalov_A549-ACE2_24h_Up
Reactome Gene Sets	6	R-HSA-400685	Sema4D in semaphorin signaling		-2.7	12	5.5	30182	25	300	3	1	0.57	10398|10627|103910	MYL9|MYL12A|MYL12B	-1.4	Phosphoproteome_Stukalov_A549-ACE2_24h_Up
Reactome Gene Sets	6	R-HSA-5674400	Constitutive Signaling by AKT1 E17K in Cancer		-2.7	12	5.5	30182	25	300	3	1	0.57	7249|84335|253260	TSC2|AKT1S1|RICTOR	-1.4	Phosphoproteome_Stukalov_A549-ACE2_24h_Up
GO Biological Processes	19	GO:0016925	protein sumoylation	19_GO:0008152 metabolic process	-2.7	7.6	4.8	30182	53	300	4	1.3	0.66	6612|6613|10155|387082	SUMO3|SUMO2|TRIM28|SUMO4	-1.4	Phosphoproteome_Stukalov_A549-ACE2_24h_Up
GO Biological Processes	19	GO:0030834	regulation of actin filament depolymerization	19_GO:0050789 regulation of biological process	-2.7	7.6	4.8	30182	53	300	4	1.3	0.66	119|6711|55604|253725	ADD2|SPTBN1|CARMIL1|WASHC2C	-1.4	Phosphoproteome_Stukalov_A549-ACE2_24h_Up
GO Biological Processes	19	GO:0032210	regulation of telomere maintenance via telomerase	19_GO:0008152 metabolic process	-2.7	7.6	4.8	30182	53	300	4	1.3	0.66	3178|4216|5594|11284	HNRNPA1|MAP3K4|MAPK1|PNKP	-1.4	Phosphoproteome_Stukalov_A549-ACE2_24h_Up
GO Biological Processes	19	GO:0045137	development of primary sexual characteristics	19_GO:0022414 reproductive process	-2.7	3.6	3.9	30182	225	300	8	2.7	0.93	546|1602|4678|5926|7110|8531|8644|9667	ATRX|DACH1|NASP|ARID4A|TMF1|YBX3|AKR1C3|SAFB2	-1.4	Phosphoproteome_Stukalov_A549-ACE2_24h_Up
GO Biological Processes	19	GO:0030833	regulation of actin filament polymerization	19_GO:0050789 regulation of biological process	-2.7	4.6	4.2	30182	130	300	6	2	0.81	119|2017|6711|55604|253260|253725	ADD2|CTTN|SPTBN1|CARMIL1|RICTOR|WASHC2C	-1.4	Phosphoproteome_Stukalov_A549-ACE2_24h_Up
Reactome Gene Sets	6	R-HSA-5687128	MAPK6/MAPK4 signaling		-2.7	5.7	4.4	30182	89	300	5	1.7	0.74	3315|3337|5058|5707|9491	HSPB1|DNAJB1|PAK1|PSMD1|PSMF1	-1.4	Phosphoproteome_Stukalov_A549-ACE2_24h_Up
GO Biological Processes	19	GO:0001701	in utero embryonic development	19_GO:0032502 developmental process	-2.7	2.8	3.6	30182	392	300	11	3.7	1.1	1627|1956|3726|4678|4848|4904|5594|8531|9782|10155|28982	DBN1|EGFR|JUNB|NASP|CNOT2|YBX1|MAPK1|YBX3|MATR3|TRIM28|FLVCR1	-1.4	Phosphoproteome_Stukalov_A549-ACE2_24h_Up
KEGG Pathway	24	hsa04068	FoxO signaling pathway		-2.7	4.6	4.1	30182	131	300	6	2	0.81	1956|5594|5599|5605|6654|9454	EGFR|MAPK1|MAPK8|MAP2K2|SOS1|HOMER3	-1.4	Phosphoproteome_Stukalov_A549-ACE2_24h_Up
GO Biological Processes	19	GO:0051983	regulation of chromosome segregation	19_GO:0050789 regulation of biological process	-2.7	4.6	4.1	30182	131	300	6	2	0.81	60|4926|6601|7175|51143|196528	ACTB|NUMA1|SMARCC2|TPR|DYNC1LI1|ARID2	-1.4	Phosphoproteome_Stukalov_A549-ACE2_24h_Up
GO Biological Processes	19	GO:0034330	cell junction organization	19_GO:0009987 cellular process	-2.7	2.5	3.5	30182	513	300	13	4.3	1.2	60|71|119|2017|4131|7082|9414|10486|28988|51599|56288|345651|440915	ACTB|ACTG1|ADD2|CTTN|MAP1B|TJP1|TJP2|CAP2|DBNL|LSR|PARD3|ACTBL2|POTEKP	-1.4	Phosphoproteome_Stukalov_A549-ACE2_24h_Up
GO Biological Processes	19	GO:0046686	response to cadmium ion	19_GO:0050896 response to stimulus	-2.7	7.5	4.8	30182	54	300	4	1.3	0.66	1956|5594|5599|8644	EGFR|MAPK1|MAPK8|AKR1C3	-1.4	Phosphoproteome_Stukalov_A549-ACE2_24h_Up
GO Biological Processes	19	GO:0002262	myeloid cell homeostasis	19_GO:0042592 homeostatic process	-2.7	4.6	4.1	30182	132	300	6	2	0.81	103|4763|5926|6194|22985|28982	ADAR|NF1|ARID4A|RPS6|ACIN1|FLVCR1	-1.4	Phosphoproteome_Stukalov_A549-ACE2_24h_Up
Reactome Gene Sets	6	R-HSA-5693567	HDR through Homologous Recombination (HRR) or Single Strand Annealing (SSA)		-2.7	4.6	4.1	30182	132	300	6	2	0.81	5883|5981|6613|8924|9656|51720	RAD9A|RFC1|SUMO2|HERC2|MDC1|UIMC1	-1.4	Phosphoproteome_Stukalov_A549-ACE2_24h_Up
Reactome Gene Sets	6	R-HSA-6803529	FGFR2 alternative splicing		-2.7	12	5.4	30182	26	300	3	1	0.57	3178|3187|23543	HNRNPA1|HNRNPH1|RBFOX2	-1.4	Phosphoproteome_Stukalov_A549-ACE2_24h_Up
GO Biological Processes	19	GO:1904353	regulation of telomere capping	19_GO:0008152 metabolic process	-2.7	12	5.4	30182	26	300	3	1	0.57	4216|5594|11284	MAP3K4|MAPK1|PNKP	-1.4	Phosphoproteome_Stukalov_A549-ACE2_24h_Up
Reactome Gene Sets	6	R-HSA-1227990	Signaling by ERBB2 in Cancer		-2.7	12	5.4	30182	26	300	3	1	0.57	1956|5782|6654	EGFR|PTPN12|SOS1	-1.4	Phosphoproteome_Stukalov_A549-ACE2_24h_Up
GO Biological Processes	19	GO:0030071	regulation of mitotic metaphase/anaphase transition	19_GO:0050789 regulation of biological process	-2.7	5.5	4.3	30182	91	300	5	1.7	0.74	60|6601|7175|51143|196528	ACTB|SMARCC2|TPR|DYNC1LI1|ARID2	-1.4	Phosphoproteome_Stukalov_A549-ACE2_24h_Up
GO Biological Processes	19	GO:0072132	mesenchyme morphogenesis	19_GO:0032502 developmental process	-2.7	7.3	4.7	30182	55	300	4	1.3	0.66	58|59|70|72	ACTA1|ACTA2|ACTC1|ACTG2	-1.4	Phosphoproteome_Stukalov_A549-ACE2_24h_Up
Canonical Pathways	11	M122	PID IL2 1PATHWAY		-2.7	7.3	4.7	30182	55	300	4	1.3	0.66	5594|5599|5605|6654	MAPK1|MAPK8|MAP2K2|SOS1	-1.4	Phosphoproteome_Stukalov_A549-ACE2_24h_Up
GO Biological Processes	19	GO:0006261	DNA-templated DNA replication	19_GO:0008152 metabolic process	-2.7	4.5	4.1	30182	133	300	6	2	0.81	546|3159|5981|11284|64710|92667	ATRX|HMGA1|RFC1|PNKP|NUCKS1|MGME1	-1.4	Phosphoproteome_Stukalov_A549-ACE2_24h_Up
GO Biological Processes	19	GO:0045580	regulation of T cell differentiation	19_GO:0002376 immune system process	-2.6	3.9	3.9	30182	180	300	7	2.3	0.87	60|3726|6522|6601|6654|29102|196528	ACTB|JUNB|SLC4A2|SMARCC2|SOS1|DROSHA|ARID2	-1.4	Phosphoproteome_Stukalov_A549-ACE2_24h_Up
GO Biological Processes	19	GO:0007059	chromosome segregation	19_GO:0009987 cellular process	-2.6	3	3.7	30182	339	300	10	3.3	1	1654|4926|9126|10270|23047|23332|27436|51203|126353|283489	DDX3X|NUMA1|SMC3|AKAP8|PDS5B|CLASP1|EML4|NUSAP1|MISP|CHAMP1	-1.4	Phosphoproteome_Stukalov_A549-ACE2_24h_Up
GO Biological Processes	19	GO:1901987	regulation of cell cycle phase transition	19_GO:0050789 regulation of biological process	-2.6	2.6	3.5	30182	457	300	12	4	1.1	60|1654|1956|5883|6601|7175|9656|51143|51720|54443|84687|196528	ACTB|DDX3X|EGFR|RAD9A|SMARCC2|TPR|MDC1|DYNC1LI1|UIMC1|ANLN|PPP1R9B|ARID2	-1.4	Phosphoproteome_Stukalov_A549-ACE2_24h_Up
Reactome Gene Sets	6	R-HSA-166520	Signaling by NTRKs		-2.6	4.5	4.1	30182	134	300	6	2	0.81	3726|5594|5605|6195|6197|6654	JUNB|MAPK1|MAP2K2|RPS6KA1|RPS6KA3|SOS1	-1.4	Phosphoproteome_Stukalov_A549-ACE2_24h_Up
GO Biological Processes	19	GO:0032984	protein-containing complex disassembly	19_GO:0009987 cellular process	-2.6	4.5	4.1	30182	134	300	6	2	0.81	3159|3831|5195|6601|84687|196528	HMGA1|KLC1|PEX14|SMARCC2|PPP1R9B|ARID2	-1.4	Phosphoproteome_Stukalov_A549-ACE2_24h_Up
GO Biological Processes	19	GO:0040011	locomotion	19_GO:0040011 locomotion	-2.6	2.5	3.5	30182	520	300	13	4.3	1.2	4684|5594|5747|6654|7249|8729|10928|23022|23077|23513|54982|55742|200576	NCAM1|MAPK1|PTK2|SOS1|TSC2|GBF1|RALBP1|PALLD|MYCBP2|SCRIB|CLN6|PARVA|PIKFYVE	-1.4	Phosphoproteome_Stukalov_A549-ACE2_24h_Up
KEGG Pathway	24	hsa04360	Axon guidance		-2.6	3.9	3.9	30182	182	300	7	2.3	0.87	5058|5594|5747|10398|10627|56288|103910	PAK1|MAPK1|PTK2|MYL9|MYL12A|PARD3|MYL12B	-1.4	Phosphoproteome_Stukalov_A549-ACE2_24h_Up
GO Biological Processes	19	GO:0051647	nucleus localization	19_GO:0051179 localization	-2.6	11	5.3	30182	27	300	3	1	0.57	4000|9368|85440	LMNA|NHERF1|DOCK7	-1.4	Phosphoproteome_Stukalov_A549-ACE2_24h_Up
Reactome Gene Sets	6	R-HSA-170834	Signaling by TGF-beta Receptor Complex		-2.6	5.4	4.3	30182	93	300	5	1.7	0.74	3726|4904|5594|50848|56288	JUNB|YBX1|MAPK1|F11R|PARD3	-1.4	Phosphoproteome_Stukalov_A549-ACE2_24h_Up
GO Biological Processes	19	GO:0006275	regulation of DNA replication	19_GO:0008152 metabolic process	-2.6	4.4	4	30182	136	300	6	2	0.81	546|1602|1956|9126|58525|64710	ATRX|DACH1|EGFR|SMC3|WIZ|NUCKS1	-1.4	Phosphoproteome_Stukalov_A549-ACE2_24h_Up
KEGG Pathway	24	hsa04210	Apoptosis		-2.6	4.4	4	30182	136	300	6	2	0.81	60|71|4000|5594|5599|5605	ACTB|ACTG1|LMNA|MAPK1|MAPK8|MAP2K2	-1.4	Phosphoproteome_Stukalov_A549-ACE2_24h_Up
GO Biological Processes	19	GO:0031060	regulation of histone methylation	19_GO:0008152 metabolic process	-2.6	7.1	4.6	30182	57	300	4	1.3	0.66	4000|7936|55183|55677	LMNA|NELFE|RIF1|IWS1	-1.3	Phosphoproteome_Stukalov_A549-ACE2_24h_Up
GO Biological Processes	19	GO:1902099	regulation of metaphase/anaphase transition of cell cycle	19_GO:0050789 regulation of biological process	-2.6	5.4	4.2	30182	94	300	5	1.7	0.74	60|6601|7175|51143|196528	ACTB|SMARCC2|TPR|DYNC1LI1|ARID2	-1.3	Phosphoproteome_Stukalov_A549-ACE2_24h_Up
GO Biological Processes	19	GO:0007052	mitotic spindle organization	19_GO:0009987 cellular process	-2.6	5.4	4.2	30182	94	300	5	1.7	0.74	4134|9126|23332|55726|126353	MAP4|SMC3|CLASP1|INTS13|MISP	-1.3	Phosphoproteome_Stukalov_A549-ACE2_24h_Up
GO Biological Processes	19	GO:0051648	vesicle localization	19_GO:0051179 localization	-2.6	3.8	3.9	30182	184	300	7	2.3	0.87	3064|8729|23332|23513|26115|63971|79083	HTT|GBF1|CLASP1|SCRIB|TANC2|KIF13A|MLPH	-1.3	Phosphoproteome_Stukalov_A549-ACE2_24h_Up
GO Biological Processes	19	GO:0001649	osteoblast differentiation	19_GO:0032502 developmental process	-2.6	4.4	4	30182	137	300	6	2	0.81	103|2194|3726|4086|4763|10514	ADAR|FASN|JUNB|SMAD1|NF1|MYBBP1A	-1.3	Phosphoproteome_Stukalov_A549-ACE2_24h_Up
GO Biological Processes	19	GO:0071396	cellular response to lipid	19_GO:0050896 response to stimulus	-2.6	2.5	3.4	30182	527	300	13	4.3	1.2	490|1956|5594|5599|6294|7110|8644|8915|10270|23543|28964|84458|84687	ATP2B1|EGFR|MAPK1|MAPK8|SAFB|TMF1|AKR1C3|BCL10|AKAP8|RBFOX2|GIT1|LCOR|PPP1R9B	-1.3	Phosphoproteome_Stukalov_A549-ACE2_24h_Up
KEGG Pathway	24	hsa04014	Ras signaling pathway		-2.6	3.4	3.7	30182	236	300	8	2.7	0.93	1956|4763|5058|5594|5599|5605|6654|10928	EGFR|NF1|PAK1|MAPK1|MAPK8|MAP2K2|SOS1|RALBP1	-1.3	Phosphoproteome_Stukalov_A549-ACE2_24h_Up
GO Biological Processes	19	GO:0071826	ribonucleoprotein complex subunit organization	19_GO:0009987 cellular process	-2.6	3.4	3.7	30182	236	300	8	2.7	0.93	103|3831|4839|9169|11218|23195|51747|79833	ADAR|KLC1|NOP2|SCAF11|DDX20|MDN1|LUC7L3|GEMIN6	-1.3	Phosphoproteome_Stukalov_A549-ACE2_24h_Up
GO Biological Processes	19	GO:0003158	endothelium development	19_GO:0032502 developmental process	-2.6	5.3	4.2	30182	95	300	5	1.7	0.74	2194|7082|9414|25865|50848	FASN|TJP1|TJP2|PRKD2|F11R	-1.3	Phosphoproteome_Stukalov_A549-ACE2_24h_Up
Reactome Gene Sets	6	R-HSA-5625740	RHO GTPases activate PKNs		-2.6	5.3	4.2	30182	95	300	5	1.7	0.74	4659|5058|10398|10627|103910	PPP1R12A|PAK1|MYL9|MYL12A|MYL12B	-1.3	Phosphoproteome_Stukalov_A549-ACE2_24h_Up
Reactome Gene Sets	6	R-HSA-5693538	Homology Directed Repair		-2.6	4.4	4	30182	138	300	6	2	0.81	5883|5981|6613|8924|9656|51720	RAD9A|RFC1|SUMO2|HERC2|MDC1|UIMC1	-1.3	Phosphoproteome_Stukalov_A549-ACE2_24h_Up
GO Biological Processes	19	GO:0044000	movement in host	19_GO:0044419 biological process involved in interspecies interaction between organisms	-2.6	4.4	4	30182	138	300	6	2	0.81	1956|4684|5817|9972|50848|200576	EGFR|NCAM1|PVR|NUP153|F11R|PIKFYVE	-1.3	Phosphoproteome_Stukalov_A549-ACE2_24h_Up
Canonical Pathways	11	M69	PID REELIN PATHWAY		-2.6	11	5.2	30182	28	300	3	1	0.57	4131|5599|9181	MAP1B|MAPK8|ARHGEF2	-1.3	Phosphoproteome_Stukalov_A549-ACE2_24h_Up
GO Biological Processes	19	GO:2000819	regulation of nucleotide-excision repair	19_GO:0050896 response to stimulus	-2.6	11	5.2	30182	28	300	3	1	0.57	60|6601|196528	ACTB|SMARCC2|ARID2	-1.3	Phosphoproteome_Stukalov_A549-ACE2_24h_Up
GO Biological Processes	19	GO:0016180	snRNA processing	19_GO:0008152 metabolic process	-2.6	11	5.2	30182	28	300	3	1	0.57	26512|55726|114034	INTS6|INTS13|TOE1	-1.3	Phosphoproteome_Stukalov_A549-ACE2_24h_Up
Reactome Gene Sets	6	R-HSA-9682385	FLT3 signaling in disease		-2.6	11	5.2	30182	28	300	3	1	0.57	6654|6711|7750	SOS1|SPTBN1|ZMYM2	-1.3	Phosphoproteome_Stukalov_A549-ACE2_24h_Up
GO Biological Processes	19	GO:0042059	negative regulation of epidermal growth factor receptor signaling pathway	19_GO:0023052 signaling	-2.6	11	5.2	30182	28	300	3	1	0.57	1956|9052|9961	EGFR|GPRC5A|MVP	-1.3	Phosphoproteome_Stukalov_A549-ACE2_24h_Up
GO Biological Processes	19	GO:0042306	regulation of protein import into nucleus	19_GO:0051179 localization	-2.6	6.9	4.5	30182	58	300	4	1.3	0.66	4763|5587|7175|10155	NF1|PRKD1|TPR|TRIM28	-1.3	Phosphoproteome_Stukalov_A549-ACE2_24h_Up
KEGG Pathway	24	hsa05213	Endometrial cancer		-2.6	6.9	4.5	30182	58	300	4	1.3	0.66	1956|5594|5605|6654	EGFR|MAPK1|MAP2K2|SOS1	-1.3	Phosphoproteome_Stukalov_A549-ACE2_24h_Up
GO Biological Processes	19	GO:0030218	erythrocyte differentiation	19_GO:0042592 homeostatic process	-2.6	5.2	4.2	30182	96	300	5	1.7	0.74	103|5926|6194|22985|28982	ADAR|ARID4A|RPS6|ACIN1|FLVCR1	-1.3	Phosphoproteome_Stukalov_A549-ACE2_24h_Up
Reactome Gene Sets	6	R-HSA-69620	Cell Cycle Checkpoints		-2.6	3.1	3.6	30182	293	300	9	3	0.98	4928|5707|5883|8924|9491|9656|23332|51143|51720	NUP98|PSMD1|RAD9A|HERC2|PSMF1|MDC1|CLASP1|DYNC1LI1|UIMC1	-1.3	Phosphoproteome_Stukalov_A549-ACE2_24h_Up
GO Biological Processes	19	GO:0033673	negative regulation of kinase activity	19_GO:0048519 negative regulation of biological process	-2.5	3.4	3.7	30182	239	300	8	2.7	0.93	103|3315|4763|7249|9052|9961|84335|124790	ADAR|HSPB1|NF1|TSC2|GPRC5A|MVP|AKT1S1|HEXIM2	-1.3	Phosphoproteome_Stukalov_A549-ACE2_24h_Up
GO Biological Processes	19	GO:2001235	positive regulation of apoptotic signaling pathway	19_GO:0023052 signaling	-2.5	4.3	3.9	30182	140	300	6	2	0.81	4763|5883|8682|8915|9368|9774	NF1|RAD9A|PEA15|BCL10|NHERF1|BCLAF1	-1.3	Phosphoproteome_Stukalov_A549-ACE2_24h_Up
KEGG Pathway	24	hsa04370	VEGF signaling pathway		-2.5	6.8	4.5	30182	59	300	4	1.3	0.66	3315|5594|5605|5747	HSPB1|MAPK1|MAP2K2|PTK2	-1.3	Phosphoproteome_Stukalov_A549-ACE2_24h_Up
Reactome Gene Sets	6	R-HSA-9664422	FCGR3A-mediated phagocytosis		-2.5	6.8	4.5	30182	59	300	4	1.3	0.66	60|71|5594|5747	ACTB|ACTG1|MAPK1|PTK2	-1.3	Phosphoproteome_Stukalov_A549-ACE2_24h_Up
GO Biological Processes	19	GO:0048255	mRNA stabilization	19_GO:0048519 negative regulation of biological process	-2.5	6.8	4.5	30182	59	300	4	1.3	0.66	4904|8531|9967|23367	YBX1|YBX3|THRAP3|LARP1	-1.3	Phosphoproteome_Stukalov_A549-ACE2_24h_Up
Reactome Gene Sets	6	R-HSA-193648	NRAGE signals death through JNK		-2.5	6.8	4.5	30182	59	300	4	1.3	0.66	2245|5599|6654|9181	FGD1|MAPK8|SOS1|ARHGEF2	-1.3	Phosphoproteome_Stukalov_A549-ACE2_24h_Up
Reactome Gene Sets	6	R-HSA-9664407	Parasite infection		-2.5	6.8	4.5	30182	59	300	4	1.3	0.66	60|71|5594|5747	ACTB|ACTG1|MAPK1|PTK2	-1.3	Phosphoproteome_Stukalov_A549-ACE2_24h_Up
Reactome Gene Sets	6	R-HSA-9664417	Leishmania phagocytosis		-2.5	6.8	4.5	30182	59	300	4	1.3	0.66	60|71|5594|5747	ACTB|ACTG1|MAPK1|PTK2	-1.3	Phosphoproteome_Stukalov_A549-ACE2_24h_Up
GO Biological Processes	19	GO:0031122	cytoplasmic microtubule organization	19_GO:0009987 cellular process	-2.5	6.8	4.5	30182	59	300	4	1.3	0.66	4926|9748|23271|23332	NUMA1|SLK|CAMSAP2|CLASP1	-1.3	Phosphoproteome_Stukalov_A549-ACE2_24h_Up
Canonical Pathways	11	M166	PID ATF2 PATHWAY		-2.5	6.8	4.5	30182	59	300	4	1.3	0.66	3726|4763|5594|5599	JUNB|NF1|MAPK1|MAPK8	-1.3	Phosphoproteome_Stukalov_A549-ACE2_24h_Up
Reactome Gene Sets	6	R-HSA-5693607	Processing of DNA double-strand break ends		-2.5	5.2	4.1	30182	97	300	5	1.7	0.74	5883|6613|8924|9656|51720	RAD9A|SUMO2|HERC2|MDC1|UIMC1	-1.3	Phosphoproteome_Stukalov_A549-ACE2_24h_Up
GO Biological Processes	19	GO:0030168	platelet activation	19_GO:0032501 multicellular organismal process	-2.5	5.2	4.1	30182	97	300	5	1.7	0.74	60|71|3315|10398|10627	ACTB|ACTG1|HSPB1|MYL9|MYL12A	-1.3	Phosphoproteome_Stukalov_A549-ACE2_24h_Up
Reactome Gene Sets	6	R-HSA-193704	p75 NTR receptor-mediated signalling		-2.5	5.2	4.1	30182	97	300	5	1.7	0.74	2245|5599|6654|8878|9181	FGD1|MAPK8|SOS1|SQSTM1|ARHGEF2	-1.3	Phosphoproteome_Stukalov_A549-ACE2_24h_Up
Canonical Pathways	11	M125	PID IGF1 PATHWAY		-2.5	10	5.1	30182	29	300	3	1	0.57	5587|5747|6654	PRKD1|PTK2|SOS1	-1.3	Phosphoproteome_Stukalov_A549-ACE2_24h_Up
GO Biological Processes	19	GO:0043001	Golgi to plasma membrane protein transport	19_GO:0051179 localization	-2.5	10	5.1	30182	29	300	3	1	0.57	3875|6711|63971	KRT18|SPTBN1|KIF13A	-1.3	Phosphoproteome_Stukalov_A549-ACE2_24h_Up
Reactome Gene Sets	6	R-HSA-442742	CREB1 phosphorylation through NMDA receptor-mediated activation of RAS signaling		-2.5	10	5.1	30182	29	300	3	1	0.57	5594|6195|6197	MAPK1|RPS6KA1|RPS6KA3	-1.3	Phosphoproteome_Stukalov_A549-ACE2_24h_Up
Reactome Gene Sets	6	R-HSA-71387	Metabolism of carbohydrates		-2.5	3.1	3.6	30182	295	300	9	3	0.98	226|2997|4927|4928|7175|8021|9972|23511|347734	ALDOA|GYS1|NUP88|NUP98|TPR|NUP214|NUP153|NUP188|SLC35B2	-1.3	Phosphoproteome_Stukalov_A549-ACE2_24h_Up
GO Biological Processes	19	GO:1903078	positive regulation of protein localization to plasma membrane	19_GO:0051179 localization	-2.5	6.7	4.4	30182	60	300	4	1.3	0.66	1956|6711|8878|84687	EGFR|SPTBN1|SQSTM1|PPP1R9B	-1.3	Phosphoproteome_Stukalov_A549-ACE2_24h_Up
KEGG Pathway	24	hsa05022	Pathways of neurodegeneration - multiple diseases		-2.5	2.5	3.4	30182	476	300	12	4	1.1	3064|3831|4741|5331|5594|5599|5605|5707|8878|9217|11273|64837	HTT|KLC1|NEFM|PLCB3|MAPK1|MAPK8|MAP2K2|PSMD1|SQSTM1|VAPB|ATXN2L|KLC2	-1.3	Phosphoproteome_Stukalov_A549-ACE2_24h_Up
Reactome Gene Sets	6	R-HSA-2467813	Separation of Sister Chromatids		-2.5	3.7	3.7	30182	191	300	7	2.3	0.87	4928|5707|9126|9491|23047|23332|51143	NUP98|PSMD1|SMC3|PSMF1|PDS5B|CLASP1|DYNC1LI1	-1.3	Phosphoproteome_Stukalov_A549-ACE2_24h_Up
GO Biological Processes	19	GO:2001243	negative regulation of intrinsic apoptotic signaling pathway	19_GO:0023052 signaling	-2.5	5.1	4.1	30182	99	300	5	1.7	0.74	1654|3315|8531|9181|51616	DDX3X|HSPB1|YBX3|ARHGEF2|TAF9B	-1.3	Phosphoproteome_Stukalov_A549-ACE2_24h_Up
GO Biological Processes	19	GO:1903706	regulation of hemopoiesis	19_GO:0002376 immune system process	-2.5	2.7	3.4	30182	415	300	11	3.7	1.1	60|2547|3726|4763|6522|6601|6654|7994|22985|29102|196528	ACTB|XRCC6|JUNB|NF1|SLC4A2|SMARCC2|SOS1|KAT6A|ACIN1|DROSHA|ARID2	-1.3	Phosphoproteome_Stukalov_A549-ACE2_24h_Up
GO Biological Processes	19	GO:0050921	positive regulation of chemotaxis	19_GO:0040011 locomotion	-2.5	4.2	3.9	30182	143	300	6	2	0.81	3315|5587|5594|5747|25865|65125	HSPB1|PRKD1|MAPK1|PTK2|PRKD2|WNK1	-1.3	Phosphoproteome_Stukalov_A549-ACE2_24h_Up
GO Biological Processes	19	GO:1904356	regulation of telomere maintenance via telomere lengthening	19_GO:0008152 metabolic process	-2.5	6.6	4.4	30182	61	300	4	1.3	0.66	3178|4216|5594|11284	HNRNPA1|MAP3K4|MAPK1|PNKP	-1.3	Phosphoproteome_Stukalov_A549-ACE2_24h_Up
Reactome Gene Sets	6	R-HSA-198725	Nuclear Events (kinase and transcription factor activation)		-2.5	6.6	4.4	30182	61	300	4	1.3	0.66	3726|5594|6195|6197	JUNB|MAPK1|RPS6KA1|RPS6KA3	-1.3	Phosphoproteome_Stukalov_A549-ACE2_24h_Up
GO Biological Processes	19	GO:0070918	regulatory ncRNA processing	19_GO:0048519 negative regulation of biological process	-2.5	6.6	4.4	30182	61	300	4	1.3	0.66	103|1654|4086|29102	ADAR|DDX3X|SMAD1|DROSHA	-1.3	Phosphoproteome_Stukalov_A549-ACE2_24h_Up
GO Biological Processes	19	GO:0090398	cellular senescence	19_GO:0050896 response to stimulus	-2.5	6.6	4.4	30182	61	300	4	1.3	0.66	3159|4000|5599|7994	HMGA1|LMNA|MAPK8|KAT6A	-1.3	Phosphoproteome_Stukalov_A549-ACE2_24h_Up
GO Biological Processes	19	GO:1900024	regulation of substrate adhesion-dependent cell spreading	19_GO:0050789 regulation of biological process	-2.5	6.6	4.4	30182	61	300	4	1.3	0.66	5747|55604|80005|253725	PTK2|CARMIL1|DOCK5|WASHC2C	-1.3	Phosphoproteome_Stukalov_A549-ACE2_24h_Up
Reactome Gene Sets	6	R-HSA-9006931	Signaling by Nuclear Receptors		-2.5	3	3.5	30182	299	300	9	3	0.98	1956|2194|2289|3315|5594|5747|7090|8644|9126	EGFR|FASN|FKBP5|HSPB1|MAPK1|PTK2|TLE3|AKR1C3|SMC3	-1.3	Phosphoproteome_Stukalov_A549-ACE2_24h_Up
Reactome Gene Sets	6	R-HSA-3928663	EPHA-mediated growth cone collapse		-2.5	10	5	30182	30	300	3	1	0.57	10398|10627|103910	MYL9|MYL12A|MYL12B	-1.3	Phosphoproteome_Stukalov_A549-ACE2_24h_Up
GO Biological Processes	19	GO:0090312	positive regulation of protein deacetylation	19_GO:0048518 positive regulation of biological process	-2.5	10	5	30182	30	300	3	1	0.57	5587|10270|25865	PRKD1|AKAP8|PRKD2	-1.3	Phosphoproteome_Stukalov_A549-ACE2_24h_Up
Canonical Pathways	11	M72	PID NECTIN PATHWAY		-2.5	10	5	30182	30	300	3	1	0.57	5747|5817|50848	PTK2|PVR|F11R	-1.3	Phosphoproteome_Stukalov_A549-ACE2_24h_Up
GO Biological Processes	19	GO:0090140	regulation of mitochondrial fission	19_GO:0032502 developmental process	-2.5	10	5	30182	30	300	3	1	0.57	10928|55737|64423	RALBP1|VPS35|INF2	-1.3	Phosphoproteome_Stukalov_A549-ACE2_24h_Up
GO Biological Processes	19	GO:1901990	regulation of mitotic cell cycle phase transition	19_GO:0050789 regulation of biological process	-2.5	2.8	3.5	30182	357	300	10	3.3	1	60|1654|1956|6601|7175|51143|51720|54443|84687|196528	ACTB|DDX3X|EGFR|SMARCC2|TPR|DYNC1LI1|UIMC1|ANLN|PPP1R9B|ARID2	-1.3	Phosphoproteome_Stukalov_A549-ACE2_24h_Up
GO Biological Processes	19	GO:0051205	protein insertion into membrane	19_GO:0051179 localization	-2.5	6.5	4.3	30182	62	300	4	1.3	0.66	1956|3308|6449|56993	EGFR|HSPA4|SGTA|TOMM22	-1.2	Phosphoproteome_Stukalov_A549-ACE2_24h_Up
Reactome Gene Sets	6	R-HSA-6807878	COPI-mediated anterograde transport		-2.5	5	4	30182	101	300	5	1.7	0.74	1314|6711|8729|9382|51143	COPA|SPTBN1|GBF1|COG1|DYNC1LI1	-1.2	Phosphoproteome_Stukalov_A549-ACE2_24h_Up
GO Biological Processes	19	GO:0002253	activation of immune response	19_GO:0002376 immune system process	-2.5	2.8	3.4	30182	360	300	10	3.3	1	2547|5058|5594|5747|6197|6654|8915|9782|25865|65125	XRCC6|PAK1|MAPK1|PTK2|RPS6KA3|SOS1|BCL10|MATR3|PRKD2|WNK1	-1.2	Phosphoproteome_Stukalov_A549-ACE2_24h_Up
GO Biological Processes	19	GO:0045089	positive regulation of innate immune response	19_GO:0044419 biological process involved in interspecies interaction between organisms	-2.5	3.3	3.6	30182	247	300	8	2.7	0.93	1654|2547|5058|5817|6197|8915|9782|10623	DDX3X|XRCC6|PAK1|PVR|RPS6KA3|BCL10|MATR3|POLR3C	-1.2	Phosphoproteome_Stukalov_A549-ACE2_24h_Up
GO Biological Processes	19	GO:0045087	innate immune response	19_GO:0044419 biological process involved in interspecies interaction between organisms	-2.5	2.2	3.2	30182	745	300	16	5.3	1.3	71|103|1654|2317|2547|5587|7791|8165|8915|9181|9782|10155|10270|10623|23580|54726	ACTG1|ADAR|DDX3X|FLNB|XRCC6|PRKD1|ZYX|AKAP1|BCL10|ARHGEF2|MATR3|TRIM28|AKAP8|POLR3C|CDC42EP4|OTUD4	-1.2	Phosphoproteome_Stukalov_A549-ACE2_24h_Up
GO Biological Processes	19	GO:0010508	positive regulation of autophagy	19_GO:0048518 positive regulation of biological process	-2.5	4.1	3.8	30182	146	300	6	2	0.81	3064|5049|5587|7249|23367|25782	HTT|PAFAH1B2|PRKD1|TSC2|LARP1|RAB3GAP2	-1.2	Phosphoproteome_Stukalov_A549-ACE2_24h_Up
Reactome Gene Sets	6	R-HSA-8856828	Clathrin-mediated endocytosis		-2.5	4.1	3.8	30182	146	300	6	2	0.81	60|71|1956|2017|22905|85021	ACTB|ACTG1|EGFR|CTTN|EPN2|REPS1	-1.2	Phosphoproteome_Stukalov_A549-ACE2_24h_Up
GO Biological Processes	19	GO:0051051	negative regulation of transport	19_GO:0051179 localization	-2.5	2.5	3.3	30182	483	300	12	4	1.1	392|4131|4763|5587|7175|8682|9368|9972|55737|55917|65125|79651	ARHGAP1|MAP1B|NF1|PRKD1|TPR|PEA15|NHERF1|NUP153|VPS35|CTTNBP2NL|WNK1|RHBDF2	-1.2	Phosphoproteome_Stukalov_A549-ACE2_24h_Up
GO Biological Processes	19	GO:0042176	regulation of protein catabolic process	19_GO:0008152 metabolic process	-2.5	2.8	3.4	30182	361	300	10	3.3	1	1956|4898|5707|5887|6449|6613|7110|9491|23077|55737	EGFR|NRDC|PSMD1|RAD23B|SGTA|SUMO2|TMF1|PSMF1|MYCBP2|VPS35	-1.2	Phosphoproteome_Stukalov_A549-ACE2_24h_Up
GO Biological Processes	19	GO:1902042	negative regulation of extrinsic apoptotic signaling pathway via death domain receptors	19_GO:0023052 signaling	-2.4	9.7	4.9	30182	31	300	3	1	0.57	1654|8682|9181	DDX3X|PEA15|ARHGEF2	-1.2	Phosphoproteome_Stukalov_A549-ACE2_24h_Up
Reactome Gene Sets	6	R-HSA-445095	Interaction between L1 and Ankyrins		-2.4	9.7	4.9	30182	31	300	3	1	0.57	60|71|6711	ACTB|ACTG1|SPTBN1	-1.2	Phosphoproteome_Stukalov_A549-ACE2_24h_Up
GO Biological Processes	19	GO:1900225	regulation of NLRP3 inflammasome complex assembly	19_GO:0050789 regulation of biological process	-2.4	9.7	4.9	30182	31	300	3	1	0.57	1654|5587|5599	DDX3X|PRKD1|MAPK8	-1.2	Phosphoproteome_Stukalov_A549-ACE2_24h_Up
GO Biological Processes	19	GO:0050778	positive regulation of immune response	19_GO:0002376 immune system process	-2.4	2.3	3.3	30182	613	300	14	4.7	1.2	1654|2547|5058|5594|5747|5817|6197|6654|8915|9782|10623|25865|55183|65125	DDX3X|XRCC6|PAK1|MAPK1|PTK2|PVR|RPS6KA3|SOS1|BCL10|MATR3|POLR3C|PRKD2|RIF1|WNK1	-1.2	Phosphoproteome_Stukalov_A549-ACE2_24h_Up
GO Biological Processes	19	GO:0006612	protein targeting to membrane	19_GO:0051179 localization	-2.4	4.9	4	30182	102	300	5	1.7	0.74	6449|6747|54557|56288|200576	SGTA|SSR3|SGTB|PARD3|PIKFYVE	-1.2	Phosphoproteome_Stukalov_A549-ACE2_24h_Up
GO Biological Processes	19	GO:1905477	positive regulation of protein localization to membrane	19_GO:0051179 localization	-2.4	4.9	4	30182	102	300	5	1.7	0.74	1956|5599|6711|8878|84687	EGFR|MAPK8|SPTBN1|SQSTM1|PPP1R9B	-1.2	Phosphoproteome_Stukalov_A549-ACE2_24h_Up
GO Biological Processes	19	GO:0006260	DNA replication	19_GO:0008152 metabolic process	-2.4	3.6	3.6	30182	196	300	7	2.3	0.87	546|3159|4678|5981|11284|64710|92667	ATRX|HMGA1|NASP|RFC1|PNKP|NUCKS1|MGME1	-1.2	Phosphoproteome_Stukalov_A549-ACE2_24h_Up
Canonical Pathways	11	M8	PID ENDOTHELIN PATHWAY		-2.4	6.4	4.3	30182	63	300	4	1.3	0.66	5331|5594|5599|5605	PLCB3|MAPK1|MAPK8|MAP2K2	-1.2	Phosphoproteome_Stukalov_A549-ACE2_24h_Up
Canonical Pathways	11	M10	PID BCR 5PATHWAY		-2.4	6.4	4.3	30182	63	300	4	1.3	0.66	5594|5599|6654|8915	MAPK1|MAPK8|SOS1|BCL10	-1.2	Phosphoproteome_Stukalov_A549-ACE2_24h_Up
GO Biological Processes	19	GO:0007264	small GTPase mediated signal transduction	19_GO:0023052 signaling	-2.4	3.2	3.5	30182	249	300	8	2.7	0.93	392|4763|6654|10928|28988|64787|80005|85440	ARHGAP1|NF1|SOS1|RALBP1|DBNL|EPS8L2|DOCK5|DOCK7	-1.2	Phosphoproteome_Stukalov_A549-ACE2_24h_Up
GO Biological Processes	19	GO:0030855	epithelial cell differentiation	19_GO:0032502 developmental process	-2.4	2.3	3.2	30182	615	300	14	4.7	1.2	59|546|2194|2317|4131|5926|7082|8644|9368|9414|9667|23022|23513|50848	ACTA2|ATRX|FASN|FLNB|MAP1B|ARID4A|TJP1|AKR1C3|NHERF1|TJP2|SAFB2|PALLD|SCRIB|F11R	-1.2	Phosphoproteome_Stukalov_A549-ACE2_24h_Up
GO Biological Processes	19	GO:0032388	positive regulation of intracellular transport	19_GO:0051179 localization	-2.4	3.6	3.6	30182	197	300	7	2.3	0.87	4926|5587|5599|7175|10075|10155|57602	NUMA1|PRKD1|MAPK8|TPR|HUWE1|TRIM28|USP36	-1.2	Phosphoproteome_Stukalov_A549-ACE2_24h_Up
GO Biological Processes	19	GO:1903008	organelle disassembly	19_GO:0009987 cellular process	-2.4	4.9	4	30182	103	300	5	1.7	0.74	3831|8729|8878|79065|162427	KLC1|GBF1|SQSTM1|ATG9A|RETREG3	-1.2	Phosphoproteome_Stukalov_A549-ACE2_24h_Up
GO Biological Processes	19	GO:1903076	regulation of protein localization to plasma membrane	19_GO:0051179 localization	-2.4	4.9	4	30182	103	300	5	1.7	0.74	60|1956|6711|8878|84687	ACTB|EGFR|SPTBN1|SQSTM1|PPP1R9B	-1.2	Phosphoproteome_Stukalov_A549-ACE2_24h_Up
KEGG Pathway	24	hsa04072	Phospholipase D signaling pathway		-2.4	4.1	3.8	30182	148	300	6	2	0.81	1956|5331|5594|5605|6654|7249	EGFR|PLCB3|MAPK1|MAP2K2|SOS1|TSC2	-1.2	Phosphoproteome_Stukalov_A549-ACE2_24h_Up
GO Biological Processes	19	GO:0098813	nuclear chromosome segregation	19_GO:0009987 cellular process	-2.4	3.2	3.5	30182	251	300	8	2.7	0.93	9126|10270|23047|23332|27436|51203|126353|283489	SMC3|AKAP8|PDS5B|CLASP1|EML4|NUSAP1|MISP|CHAMP1	-1.2	Phosphoproteome_Stukalov_A549-ACE2_24h_Up
GO Biological Processes	19	GO:0090109	regulation of cell-substrate junction assembly	19_GO:0050789 regulation of biological process	-2.4	6.3	4.2	30182	64	300	4	1.3	0.66	71|5747|9748|23332	ACTG1|PTK2|SLK|CLASP1	-1.2	Phosphoproteome_Stukalov_A549-ACE2_24h_Up
GO Biological Processes	19	GO:0030239	myofibril assembly	19_GO:0032502 developmental process	-2.4	6.3	4.2	30182	64	300	4	1.3	0.66	58|70|71|10398	ACTA1|ACTC1|ACTG1|MYL9	-1.2	Phosphoproteome_Stukalov_A549-ACE2_24h_Up
Canonical Pathways	11	M34	PID TCR PATHWAY		-2.4	6.3	4.2	30182	64	300	4	1.3	0.66	6452|6654|8915|28988	SH3BP2|SOS1|BCL10|DBNL	-1.2	Phosphoproteome_Stukalov_A549-ACE2_24h_Up
GO Biological Processes	19	GO:0051893	regulation of focal adhesion assembly	19_GO:0050789 regulation of biological process	-2.4	6.3	4.2	30182	64	300	4	1.3	0.66	71|5747|9748|23332	ACTG1|PTK2|SLK|CLASP1	-1.2	Phosphoproteome_Stukalov_A549-ACE2_24h_Up
Reactome Gene Sets	6	R-HSA-450294	MAP kinase activation		-2.4	6.3	4.2	30182	64	300	4	1.3	0.66	5594|5599|6195|6197	MAPK1|MAPK8|RPS6KA1|RPS6KA3	-1.2	Phosphoproteome_Stukalov_A549-ACE2_24h_Up
GO Biological Processes	19	GO:0040029	epigenetic regulation of gene expression	19_GO:0008152 metabolic process	-2.4	4.1	3.7	30182	149	300	6	2	0.81	546|1786|4000|5926|22880|55183	ATRX|DNMT1|LMNA|ARID4A|MORC2|RIF1	-1.2	Phosphoproteome_Stukalov_A549-ACE2_24h_Up
GO Biological Processes	19	GO:0008064	regulation of actin polymerization or depolymerization	19_GO:0050789 regulation of biological process	-2.4	4.1	3.7	30182	149	300	6	2	0.81	119|2017|6711|55604|253260|253725	ADD2|CTTN|SPTBN1|CARMIL1|RICTOR|WASHC2C	-1.2	Phosphoproteome_Stukalov_A549-ACE2_24h_Up
GO Biological Processes	19	GO:0032204	regulation of telomere maintenance	19_GO:0008152 metabolic process	-2.4	4.8	3.9	30182	104	300	5	1.7	0.74	546|3178|4216|5594|11284	ATRX|HNRNPA1|MAP3K4|MAPK1|PNKP	-1.2	Phosphoproteome_Stukalov_A549-ACE2_24h_Up
GO Biological Processes	19	GO:0099173	postsynapse organization	19_GO:0009987 cellular process	-2.4	4.8	3.9	30182	104	300	5	1.7	0.74	60|71|2017|345651|440915	ACTB|ACTG1|CTTN|ACTBL2|POTEKP	-1.2	Phosphoproteome_Stukalov_A549-ACE2_24h_Up
GO Biological Processes	19	GO:0061024	membrane organization	19_GO:0009987 cellular process	-2.4	2.1	3.2	30182	754	300	16	5.3	1.3	1956|3308|4000|5599|6449|6711|8729|9217|9368|22872|26092|26207|28988|56993|79065|200576	EGFR|HSPA4|LMNA|MAPK8|SGTA|SPTBN1|GBF1|VAPB|NHERF1|SEC31A|TOR1AIP1|PITPNC1|DBNL|TOMM22|ATG9A|PIKFYVE	-1.2	Phosphoproteome_Stukalov_A549-ACE2_24h_Up
GO Biological Processes	19	GO:0032886	regulation of microtubule-based process	19_GO:0050789 regulation of biological process	-2.4	3.2	3.5	30182	252	300	8	2.7	0.93	4131|4926|5058|7175|9181|23271|23332|28964	MAP1B|NUMA1|PAK1|TPR|ARHGEF2|CAMSAP2|CLASP1|GIT1	-1.2	Phosphoproteome_Stukalov_A549-ACE2_24h_Up
GO Biological Processes	19	GO:0051642	centrosome localization	19_GO:0051179 localization	-2.4	9.4	4.8	30182	32	300	3	1	0.57	55726|56288|126353	INTS13|PARD3|MISP	-1.2	Phosphoproteome_Stukalov_A549-ACE2_24h_Up
GO Biological Processes	19	GO:0034694	response to prostaglandin	19_GO:0050896 response to stimulus	-2.4	9.4	4.8	30182	32	300	3	1	0.57	8644|10270|84687	AKR1C3|AKAP8|PPP1R9B	-1.2	Phosphoproteome_Stukalov_A549-ACE2_24h_Up
GO Biological Processes	19	GO:0061842	microtubule organizing center localization	19_GO:0051179 localization	-2.4	9.4	4.8	30182	32	300	3	1	0.57	55726|56288|126353	INTS13|PARD3|MISP	-1.2	Phosphoproteome_Stukalov_A549-ACE2_24h_Up
Reactome Gene Sets	6	R-HSA-109582	Hemostasis		-2.4	2.3	3.2	30182	621	300	14	4.7	1.2	60|226|490|3831|5594|5747|6566|6654|8165|50848|55604|64837|80005|85440	ACTB|ALDOA|ATP2B1|KLC1|MAPK1|PTK2|SLC16A1|SOS1|AKAP1|F11R|CARMIL1|KLC2|DOCK5|DOCK7	-1.2	Phosphoproteome_Stukalov_A549-ACE2_24h_Up
Reactome Gene Sets	6	R-HSA-373755	Semaphorin interactions		-2.4	6.2	4.2	30182	65	300	4	1.3	0.66	5058|10398|10627|103910	PAK1|MYL9|MYL12A|MYL12B	-1.2	Phosphoproteome_Stukalov_A549-ACE2_24h_Up
Canonical Pathways	11	M15	PID LYSOPHOSPHOLIPID PATHWAY		-2.4	6.2	4.2	30182	65	300	4	1.3	0.66	1956|5331|5587|5747	EGFR|PLCB3|PRKD1|PTK2	-1.2	Phosphoproteome_Stukalov_A549-ACE2_24h_Up
Canonical Pathways	11	M272	PID CD8 TCR DOWNSTREAM PATHWAY		-2.4	6.2	4.2	30182	65	300	4	1.3	0.66	3726|5594|5599|5605	JUNB|MAPK1|MAPK8|MAP2K2	-1.2	Phosphoproteome_Stukalov_A549-ACE2_24h_Up
GO Biological Processes	19	GO:0055002	striated muscle cell development	19_GO:0032502 developmental process	-2.4	6.2	4.2	30182	65	300	4	1.3	0.66	58|70|71|10398	ACTA1|ACTC1|ACTG1|MYL9	-1.2	Phosphoproteome_Stukalov_A549-ACE2_24h_Up
GO Biological Processes	19	GO:0032784	regulation of DNA-templated transcription elongation	19_GO:0008152 metabolic process	-2.4	4.8	3.9	30182	105	300	5	1.7	0.74	7936|26512|51574|51755|55726	NELFE|INTS6|LARP7|CDK12|INTS13	-1.2	Phosphoproteome_Stukalov_A549-ACE2_24h_Up
GO Biological Processes	19	GO:0034101	erythrocyte homeostasis	19_GO:0042592 homeostatic process	-2.4	4.8	3.9	30182	105	300	5	1.7	0.74	103|5926|6194|22985|28982	ADAR|ARID4A|RPS6|ACIN1|FLVCR1	-1.2	Phosphoproteome_Stukalov_A549-ACE2_24h_Up
GO Biological Processes	19	GO:0030832	regulation of actin filament length	19_GO:0050789 regulation of biological process	-2.4	4	3.7	30182	152	300	6	2	0.81	119|2017|6711|55604|253260|253725	ADD2|CTTN|SPTBN1|CARMIL1|RICTOR|WASHC2C	-1.2	Phosphoproteome_Stukalov_A549-ACE2_24h_Up
GO Biological Processes	19	GO:0051497	negative regulation of stress fiber assembly	19_GO:0048519 negative regulation of biological process	-2.4	9.1	4.7	30182	33	300	3	1	0.57	7082|23332|50848	TJP1|CLASP1|F11R	-1.2	Phosphoproteome_Stukalov_A549-ACE2_24h_Up
Canonical Pathways	11	M240	PID SYNDECAN 2 PATHWAY		-2.4	9.1	4.7	30182	33	300	3	1	0.57	4763|5594|5599	NF1|MAPK1|MAPK8	-1.2	Phosphoproteome_Stukalov_A549-ACE2_24h_Up
Reactome Gene Sets	6	R-HSA-418990	Adherens junctions interactions		-2.4	9.1	4.7	30182	33	300	3	1	0.57	60|71|5817	ACTB|ACTG1|PVR	-1.2	Phosphoproteome_Stukalov_A549-ACE2_24h_Up
GO Biological Processes	19	GO:0045088	regulation of innate immune response	19_GO:0044419 biological process involved in interspecies interaction between organisms	-2.4	2.7	3.3	30182	373	300	10	3.3	1	103|1654|2547|5058|5817|6197|8915|9782|10623|54726	ADAR|DDX3X|XRCC6|PAK1|PVR|RPS6KA3|BCL10|MATR3|POLR3C|OTUD4	-1.2	Phosphoproteome_Stukalov_A549-ACE2_24h_Up
GO Biological Processes	19	GO:0007507	heart development	19_GO:0032502 developmental process	-2.4	2.3	3.2	30182	562	300	13	4.3	1.2	70|2997|4000|4086|4763|5594|5605|5747|6654|7249|9782|55742|196528	ACTC1|GYS1|LMNA|SMAD1|NF1|MAPK1|MAP2K2|PTK2|SOS1|TSC2|MATR3|PARVA|ARID2	-1.2	Phosphoproteome_Stukalov_A549-ACE2_24h_Up
GO Biological Processes	19	GO:0032259	methylation	19_GO:0008152 metabolic process	-2.4	2.9	3.4	30182	314	300	9	3	0.98	546|1786|4839|5926|9757|10155|23091|51574|79066	ATRX|DNMT1|NOP2|ARID4A|KMT2B|TRIM28|ZC3H13|LARP7|METTL16	-1.2	Phosphoproteome_Stukalov_A549-ACE2_24h_Up
Reactome Gene Sets	6	R-HSA-68877	Mitotic Prometaphase		-2.4	3.5	3.5	30182	204	300	7	2.3	0.87	4926|4928|9126|23047|23332|27436|51143	NUMA1|NUP98|SMC3|PDS5B|CLASP1|EML4|DYNC1LI1	-1.2	Phosphoproteome_Stukalov_A549-ACE2_24h_Up
GO Biological Processes	19	GO:0045927	positive regulation of growth	19_GO:0040007 growth	-2.3	3.1	3.4	30182	258	300	8	2.7	0.93	1654|1956|4131|6195|6197|8531|51616|253260	DDX3X|EGFR|MAP1B|RPS6KA1|RPS6KA3|YBX3|TAF9B|RICTOR	-1.2	Phosphoproteome_Stukalov_A549-ACE2_24h_Up
GO Biological Processes	19	GO:0002768	immune response-regulating cell surface receptor signaling pathway	19_GO:0002376 immune system process	-2.3	3.1	3.4	30182	258	300	8	2.7	0.93	5058|5594|5599|5747|6654|8915|25865|65125	PAK1|MAPK1|MAPK8|PTK2|SOS1|BCL10|PRKD2|WNK1	-1.2	Phosphoproteome_Stukalov_A549-ACE2_24h_Up
Canonical Pathways	11	M105	PID TELOMERASE PATHWAY		-2.3	6	4.1	30182	67	300	4	1.3	0.66	1956|2547|5594|5883	EGFR|XRCC6|MAPK1|RAD9A	-1.2	Phosphoproteome_Stukalov_A549-ACE2_24h_Up
Reactome Gene Sets	6	R-HSA-199977	ER to Golgi Anterograde Transport		-2.3	3.9	3.6	30182	154	300	6	2	0.81	1314|6711|8729|9382|22872|51143	COPA|SPTBN1|GBF1|COG1|SEC31A|DYNC1LI1	-1.2	Phosphoproteome_Stukalov_A549-ACE2_24h_Up
GO Biological Processes	19	GO:0033138	positive regulation of peptidyl-serine phosphorylation	19_GO:0048518 positive regulation of biological process	-2.3	4.7	3.8	30182	108	300	5	1.7	0.74	1956|5058|5587|25865|85440	EGFR|PAK1|PRKD1|PRKD2|DOCK7	-1.2	Phosphoproteome_Stukalov_A549-ACE2_24h_Up
KEGG Pathway	24	hsa04931	Insulin resistance		-2.3	4.7	3.8	30182	108	300	5	1.7	0.74	2997|5599|6195|6197|10724	GYS1|MAPK8|RPS6KA1|RPS6KA3|OGA	-1.2	Phosphoproteome_Stukalov_A549-ACE2_24h_Up
GO Biological Processes	19	GO:0031347	regulation of defense response	19_GO:0050896 response to stimulus	-2.3	2.1	3.1	30182	767	300	16	5.3	1.3	103|1654|2547|5058|5817|6197|7791|8915|9782|10623|28964|29102|54726|55737|79651|253260	ADAR|DDX3X|XRCC6|PAK1|PVR|RPS6KA3|ZYX|BCL10|MATR3|POLR3C|GIT1|DROSHA|OTUD4|VPS35|RHBDF2|RICTOR	-1.2	Phosphoproteome_Stukalov_A549-ACE2_24h_Up
GO Biological Processes	19	GO:0006935	chemotaxis	19_GO:0040011 locomotion	-2.3	2.4	3.2	30182	500	300	12	4	1.1	4684|5594|5747|6654|7249|8729|10928|23022|23077|23513|55742|200576	NCAM1|MAPK1|PTK2|SOS1|TSC2|GBF1|RALBP1|PALLD|MYCBP2|SCRIB|PARVA|PIKFYVE	-1.2	Phosphoproteome_Stukalov_A549-ACE2_24h_Up
Reactome Gene Sets	6	R-HSA-187687	Signalling to ERKs		-2.3	8.9	4.6	30182	34	300	3	1	0.57	5594|5605|6654	MAPK1|MAP2K2|SOS1	-1.2	Phosphoproteome_Stukalov_A549-ACE2_24h_Up
GO Biological Processes	19	GO:0051973	positive regulation of telomerase activity	19_GO:0048518 positive regulation of biological process	-2.3	8.9	4.6	30182	34	300	3	1	0.57	4216|5594|11284	MAP3K4|MAPK1|PNKP	-1.2	Phosphoproteome_Stukalov_A549-ACE2_24h_Up
GO Biological Processes	19	GO:0000132	establishment of mitotic spindle orientation	19_GO:0051179 localization	-2.3	8.9	4.6	30182	34	300	3	1	0.57	3064|4926|126353	HTT|NUMA1|MISP	-1.2	Phosphoproteome_Stukalov_A549-ACE2_24h_Up
GO Biological Processes	19	GO:0090316	positive regulation of intracellular protein transport	19_GO:0051179 localization	-2.3	3.9	3.6	30182	155	300	6	2	0.81	5587|5599|7175|10075|10155|57602	PRKD1|MAPK8|TPR|HUWE1|TRIM28|USP36	-1.2	Phosphoproteome_Stukalov_A549-ACE2_24h_Up
GO Biological Processes	19	GO:0050808	synapse organization	19_GO:0009987 cellular process	-2.3	2.9	3.3	30182	317	300	9	3	0.98	60|71|119|2017|4131|10486|28988|345651|440915	ACTB|ACTG1|ADD2|CTTN|MAP1B|CAP2|DBNL|ACTBL2|POTEKP	-1.1	Phosphoproteome_Stukalov_A549-ACE2_24h_Up
KEGG Pathway	24	hsa04066	HIF-1 signaling pathway		-2.3	4.6	3.8	30182	109	300	5	1.7	0.74	226|1956|5594|5605|6194	ALDOA|EGFR|MAPK1|MAP2K2|RPS6	-1.1	Phosphoproteome_Stukalov_A549-ACE2_24h_Up
GO Biological Processes	19	GO:0090130	tissue migration	19_GO:0032501 multicellular organismal process	-2.3	4.6	3.8	30182	109	300	5	1.7	0.74	58|59|70|72|54443	ACTA1|ACTA2|ACTC1|ACTG2|ANLN	-1.1	Phosphoproteome_Stukalov_A549-ACE2_24h_Up
GO Biological Processes	19	GO:0031507	heterochromatin formation	19_GO:0048519 negative regulation of biological process	-2.3	5.9	4.1	30182	68	300	4	1.3	0.66	546|1786|4000|55183	ATRX|DNMT1|LMNA|RIF1	-1.1	Phosphoproteome_Stukalov_A549-ACE2_24h_Up
KEGG Pathway	24	hsa04664	Fc epsilon RI signaling pathway		-2.3	5.9	4.1	30182	68	300	4	1.3	0.66	5594|5599|5605|6654	MAPK1|MAPK8|MAP2K2|SOS1	-1.1	Phosphoproteome_Stukalov_A549-ACE2_24h_Up
GO Biological Processes	19	GO:0043489	RNA stabilization	19_GO:0048519 negative regulation of biological process	-2.3	5.9	4.1	30182	68	300	4	1.3	0.66	4904|8531|9967|23367	YBX1|YBX3|THRAP3|LARP1	-1.1	Phosphoproteome_Stukalov_A549-ACE2_24h_Up
GO Biological Processes	19	GO:0042330	taxis	19_GO:0040011 locomotion	-2.3	2.4	3.2	30182	502	300	12	4	1.1	4684|5594|5747|6654|7249|8729|10928|23022|23077|23513|55742|200576	NCAM1|MAPK1|PTK2|SOS1|TSC2|GBF1|RALBP1|PALLD|MYCBP2|SCRIB|PARVA|PIKFYVE	-1.1	Phosphoproteome_Stukalov_A549-ACE2_24h_Up
GO Biological Processes	19	GO:0051701	biological process involved in interaction with host	19_GO:0044419 biological process involved in interspecies interaction between organisms	-2.3	3.9	3.6	30182	156	300	6	2	0.81	1956|4684|5817|9972|50848|200576	EGFR|NCAM1|PVR|NUP153|F11R|PIKFYVE	-1.1	Phosphoproteome_Stukalov_A549-ACE2_24h_Up
GO Biological Processes	19	GO:1902115	regulation of organelle assembly	19_GO:0050789 regulation of biological process	-2.3	3.4	3.5	30182	207	300	7	2.3	0.87	3064|4134|4848|4926|7175|25782|200576	HTT|MAP4|CNOT2|NUMA1|TPR|RAB3GAP2|PIKFYVE	-1.1	Phosphoproteome_Stukalov_A549-ACE2_24h_Up
GO Biological Processes	19	GO:0090068	positive regulation of cell cycle process	19_GO:0048518 positive regulation of biological process	-2.3	3.1	3.4	30182	262	300	8	2.7	0.93	546|1654|1956|4926|7175|51143|51203|58525	ATRX|DDX3X|EGFR|NUMA1|TPR|DYNC1LI1|NUSAP1|WIZ	-1.1	Phosphoproteome_Stukalov_A549-ACE2_24h_Up
KEGG Pathway	24	hsa05211	Renal cell carcinoma		-2.3	5.8	4	30182	69	300	4	1.3	0.66	5058|5594|5605|6654	PAK1|MAPK1|MAP2K2|SOS1	-1.1	Phosphoproteome_Stukalov_A549-ACE2_24h_Up
Canonical Pathways	11	M237	PID VEGFR1 2 PATHWAY		-2.3	5.8	4	30182	69	300	4	1.3	0.66	5594|5605|5747|8165	MAPK1|MAP2K2|PTK2|AKAP1	-1.1	Phosphoproteome_Stukalov_A549-ACE2_24h_Up
GO Biological Processes	19	GO:0150116	regulation of cell-substrate junction organization	19_GO:0050789 regulation of biological process	-2.3	5.8	4	30182	69	300	4	1.3	0.66	71|5747|9748|23332	ACTG1|PTK2|SLK|CLASP1	-1.1	Phosphoproteome_Stukalov_A549-ACE2_24h_Up
Reactome Gene Sets	6	R-HSA-9706574	RHOBTB GTPase Cycle		-2.3	8.6	4.5	30182	35	300	3	1	0.57	71|1627|10250	ACTG1|DBN1|SRRM1	-1.1	Phosphoproteome_Stukalov_A549-ACE2_24h_Up
Canonical Pathways	11	M16801	SIG REGULATION OF THE ACTIN CYTOSKELETON BY RHO GTPASES		-2.3	8.6	4.5	30182	35	300	3	1	0.57	71|72|5058	ACTG1|ACTG2|PAK1	-1.1	Phosphoproteome_Stukalov_A549-ACE2_24h_Up
GO Biological Processes	19	GO:0090162	establishment of epithelial cell polarity	19_GO:0009987 cellular process	-2.3	8.6	4.5	30182	35	300	3	1	0.57	9368|23332|56288	NHERF1|CLASP1|PARD3	-1.1	Phosphoproteome_Stukalov_A549-ACE2_24h_Up
GO Biological Processes	19	GO:0001568	blood vessel development	19_GO:0032502 developmental process	-2.3	2.4	3.2	30182	506	300	12	4	1.1	59|71|3726|4763|5587|5594|5747|6654|25865|28982|55742|196528	ACTA2|ACTG1|JUNB|NF1|PRKD1|MAPK1|PTK2|SOS1|PRKD2|FLVCR1|PARVA|ARID2	-1.1	Phosphoproteome_Stukalov_A549-ACE2_24h_Up
GO Biological Processes	19	GO:0051146	striated muscle cell differentiation	19_GO:0032502 developmental process	-2.3	3.4	3.4	30182	209	300	7	2.3	0.87	58|70|71|4000|9043|10398|80005	ACTA1|ACTC1|ACTG1|LMNA|SPAG9|MYL9|DOCK5	-1.1	Phosphoproteome_Stukalov_A549-ACE2_24h_Up
GO Biological Processes	19	GO:0097191	extrinsic apoptotic signaling pathway	19_GO:0023052 signaling	-2.3	4.5	3.7	30182	111	300	5	1.7	0.74	1654|2017|3875|4763|51202	DDX3X|CTTN|KRT18|NF1|DDX47	-1.1	Phosphoproteome_Stukalov_A549-ACE2_24h_Up
Reactome Gene Sets	6	R-HSA-5696398	Nucleotide Excision Repair		-2.3	4.5	3.7	30182	111	300	5	1.7	0.74	60|5887|5981|6612|6613	ACTB|RAD23B|RFC1|SUMO3|SUMO2	-1.1	Phosphoproteome_Stukalov_A549-ACE2_24h_Up
GO Biological Processes	19	GO:0044403	biological process involved in symbiotic interaction	19_GO:0044419 biological process involved in interspecies interaction between organisms	-2.3	3	3.3	30182	264	300	8	2.7	0.93	1956|2194|4684|5817|9972|50848|64710|200576	EGFR|FASN|NCAM1|PVR|NUP153|F11R|NUCKS1|PIKFYVE	-1.1	Phosphoproteome_Stukalov_A549-ACE2_24h_Up
GO Biological Processes	19	GO:0002764	immune response-regulating signaling pathway	19_GO:0002376 immune system process	-2.3	2.8	3.3	30182	322	300	9	3	0.98	5058|5594|5599|5747|6197|6654|8915|25865|65125	PAK1|MAPK1|MAPK8|PTK2|RPS6KA3|SOS1|BCL10|PRKD2|WNK1	-1.1	Phosphoproteome_Stukalov_A549-ACE2_24h_Up
Canonical Pathways	11	M81	PID CDC42 PATHWAY		-2.3	5.7	4	30182	70	300	4	1.3	0.66	5058|5594|5599|8476	PAK1|MAPK1|MAPK8|CDC42BPA	-1.1	Phosphoproteome_Stukalov_A549-ACE2_24h_Up
KEGG Pathway	24	hsa04917	Prolactin signaling pathway		-2.3	5.7	4	30182	70	300	4	1.3	0.66	5594|5599|5605|6654	MAPK1|MAPK8|MAP2K2|SOS1	-1.1	Phosphoproteome_Stukalov_A549-ACE2_24h_Up
GO Biological Processes	19	GO:0104004	cellular response to environmental stimulus	19_GO:0050896 response to stimulus	-2.3	2.8	3.3	30182	323	300	9	3	0.98	1654|2547|5599|5883|8531|8915|9181|50848|64710	DDX3X|XRCC6|MAPK8|RAD9A|YBX3|BCL10|ARHGEF2|F11R|NUCKS1	-1.1	Phosphoproteome_Stukalov_A549-ACE2_24h_Up
GO Biological Processes	19	GO:0071214	cellular response to abiotic stimulus	19_GO:0050896 response to stimulus	-2.3	2.8	3.3	30182	323	300	9	3	0.98	1654|2547|5599|5883|8531|8915|9181|50848|64710	DDX3X|XRCC6|MAPK8|RAD9A|YBX3|BCL10|ARHGEF2|F11R|NUCKS1	-1.1	Phosphoproteome_Stukalov_A549-ACE2_24h_Up
GO Biological Processes	19	GO:0042177	negative regulation of protein catabolic process	19_GO:0048519 negative regulation of biological process	-2.3	4.5	3.7	30182	112	300	5	1.7	0.74	1956|6449|9491|23077|55737	EGFR|SGTA|PSMF1|MYCBP2|VPS35	-1.1	Phosphoproteome_Stukalov_A549-ACE2_24h_Up
GO Biological Processes	19	GO:0006364	rRNA processing	19_GO:0008152 metabolic process	-2.3	3.3	3.4	30182	211	300	7	2.3	0.87	4839|6194|11137|29102|51202|51729|79066	NOP2|RPS6|PWP1|DROSHA|DDX47|WBP11|METTL16	-1.1	Phosphoproteome_Stukalov_A549-ACE2_24h_Up
GO Biological Processes	19	GO:1901699	cellular response to nitrogen compound	19_GO:0050896 response to stimulus	-2.3	2.2	3.1	30182	643	300	14	4.7	1.2	58|60|546|1786|1956|4131|5594|5747|6654|9181|9368|23367|55667|84687	ACTA1|ACTB|ATRX|DNMT1|EGFR|MAP1B|MAPK1|PTK2|SOS1|ARHGEF2|NHERF1|LARP1|DENND4C|PPP1R9B	-1.1	Phosphoproteome_Stukalov_A549-ACE2_24h_Up
Reactome Gene Sets	6	R-HSA-2173796	SMAD2/SMAD3:SMAD4 heterotrimer regulates transcription		-2.3	8.4	4.4	30182	36	300	3	1	0.57	3726|4904|5594	JUNB|YBX1|MAPK1	-1.1	Phosphoproteome_Stukalov_A549-ACE2_24h_Up
GO Biological Processes	19	GO:0031929	TOR signaling	19_GO:0023052 signaling	-2.3	8.4	4.4	30182	36	300	3	1	0.57	6194|23367|253260	RPS6|LARP1|RICTOR	-1.1	Phosphoproteome_Stukalov_A549-ACE2_24h_Up
GO Biological Processes	19	GO:1903749	positive regulation of establishment of protein localization to mitochondrion	19_GO:0051179 localization	-2.3	8.4	4.4	30182	36	300	3	1	0.57	5599|10075|57602	MAPK8|HUWE1|USP36	-1.1	Phosphoproteome_Stukalov_A549-ACE2_24h_Up
Canonical Pathways	11	M22	PID GMCSF PATHWAY		-2.3	8.4	4.4	30182	36	300	3	1	0.57	5594|5605|6654	MAPK1|MAP2K2|SOS1	-1.1	Phosphoproteome_Stukalov_A549-ACE2_24h_Up
GO Biological Processes	19	GO:0032232	negative regulation of actin filament bundle assembly	19_GO:0048519 negative regulation of biological process	-2.3	8.4	4.4	30182	36	300	3	1	0.57	7082|23332|50848	TJP1|CLASP1|F11R	-1.1	Phosphoproteome_Stukalov_A549-ACE2_24h_Up
GO Biological Processes	19	GO:1902373	negative regulation of mRNA catabolic process	19_GO:0048519 negative regulation of biological process	-2.3	5.7	3.9	30182	71	300	4	1.3	0.66	4904|8531|9967|23367	YBX1|YBX3|THRAP3|LARP1	-1.1	Phosphoproteome_Stukalov_A549-ACE2_24h_Up
GO Biological Processes	19	GO:0042327	positive regulation of phosphorylation	19_GO:0048518 positive regulation of biological process	-2.2	2	3	30182	786	300	16	5.3	1.3	1654|1956|2547|4216|5058|5587|5594|5605|5747|8878|8915|9181|10928|25865|85440|253260	DDX3X|EGFR|XRCC6|MAP3K4|PAK1|PRKD1|MAPK1|MAP2K2|PTK2|SQSTM1|BCL10|ARHGEF2|RALBP1|PRKD2|DOCK7|RICTOR	-1.1	Phosphoproteome_Stukalov_A549-ACE2_24h_Up
KEGG Pathway	24	hsa04137	Mitophagy - animal		-2.2	5.6	3.9	30182	72	300	4	1.3	0.66	5599|8878|23786|79065	MAPK8|SQSTM1|BCL2L13|ATG9A	-1.1	Phosphoproteome_Stukalov_A549-ACE2_24h_Up
Reactome Gene Sets	6	R-HSA-448424	Interleukin-17 signaling		-2.2	5.6	3.9	30182	72	300	4	1.3	0.66	5594|5599|6195|6197	MAPK1|MAPK8|RPS6KA1|RPS6KA3	-1.1	Phosphoproteome_Stukalov_A549-ACE2_24h_Up
GO Biological Processes	19	GO:0002009	morphogenesis of an epithelium	19_GO:0032502 developmental process	-2.2	2.5	3.1	30182	451	300	11	3.7	1.1	60|71|1956|5058|6654|7249|8915|9368|10155|23513|25865	ACTB|ACTG1|EGFR|PAK1|SOS1|TSC2|BCL10|NHERF1|TRIM28|SCRIB|PRKD2	-1.1	Phosphoproteome_Stukalov_A549-ACE2_24h_Up
GO Biological Processes	19	GO:0001934	positive regulation of protein phosphorylation	19_GO:0048518 positive regulation of biological process	-2.2	2.1	3	30182	718	300	15	5	1.3	1654|1956|2547|4216|5058|5587|5594|5605|5747|8878|9181|10928|25865|85440|253260	DDX3X|EGFR|XRCC6|MAP3K4|PAK1|PRKD1|MAPK1|MAP2K2|PTK2|SQSTM1|ARHGEF2|RALBP1|PRKD2|DOCK7|RICTOR	-1.1	Phosphoproteome_Stukalov_A549-ACE2_24h_Up
Reactome Gene Sets	6	R-HSA-9735869	SARS-CoV-1 modulates host translation machinery		-2.2	8.2	4.4	30182	37	300	3	1	0.57	3178|6194|6224	HNRNPA1|RPS6|RPS20	-1.1	Phosphoproteome_Stukalov_A549-ACE2_24h_Up
KEGG Pathway	24	hsa05216	Thyroid cancer		-2.2	8.2	4.4	30182	37	300	3	1	0.57	5594|5605|7175	MAPK1|MAP2K2|TPR	-1.1	Phosphoproteome_Stukalov_A549-ACE2_24h_Up
KEGG Pathway	24	hsa05165	Human papillomavirus infection		-2.2	2.7	3.2	30182	331	300	9	3	0.98	1956|5594|5605|5747|6654|7249|9368|23513|56288	EGFR|MAPK1|MAP2K2|PTK2|SOS1|TSC2|NHERF1|SCRIB|PARD3	-1.1	Phosphoproteome_Stukalov_A549-ACE2_24h_Up
GO Biological Processes	19	GO:0071417	cellular response to organonitrogen compound	19_GO:0050896 response to stimulus	-2.2	2.2	3	30182	586	300	13	4.3	1.2	58|60|1786|1956|4131|5594|5747|6654|9181|9368|23367|55667|84687	ACTA1|ACTB|DNMT1|EGFR|MAP1B|MAPK1|PTK2|SOS1|ARHGEF2|NHERF1|LARP1|DENND4C|PPP1R9B	-1.1	Phosphoproteome_Stukalov_A549-ACE2_24h_Up
GO Biological Processes	19	GO:0050865	regulation of cell activation	19_GO:0032501 multicellular organismal process	-2.2	2.2	3	30182	655	300	14	4.7	1.2	59|60|2547|3726|6195|6522|6601|6654|8915|23513|29102|50848|55183|196528	ACTA2|ACTB|XRCC6|JUNB|RPS6KA1|SLC4A2|SMARCC2|SOS1|BCL10|SCRIB|DROSHA|F11R|RIF1|ARID2	-1	Phosphoproteome_Stukalov_A549-ACE2_24h_Up
Reactome Gene Sets	6	R-HSA-9013424	RHOV GTPase cycle		-2.2	7.9	4.3	30182	38	300	3	1	0.57	5058|6711|28964	PAK1|SPTBN1|GIT1	-1	Phosphoproteome_Stukalov_A549-ACE2_24h_Up
GO Biological Processes	19	GO:0048821	erythrocyte development	19_GO:0042592 homeostatic process	-2.2	7.9	4.3	30182	38	300	3	1	0.57	5926|6194|28982	ARID4A|RPS6|FLVCR1	-1	Phosphoproteome_Stukalov_A549-ACE2_24h_Up
GO Biological Processes	19	GO:0090630	activation of GTPase activity	19_GO:0065007 biological regulation	-2.2	4.3	3.6	30182	117	300	5	1.7	0.74	9779|23102|23513|26000|85440	TBC1D5|TBC1D2B|SCRIB|TBC1D10B|DOCK7	-1	Phosphoproteome_Stukalov_A549-ACE2_24h_Up
Reactome Gene Sets	6	R-HSA-9013408	RHOG GTPase cycle		-2.2	5.4	3.8	30182	74	300	4	1.3	0.66	392|3895|9217|80005	ARHGAP1|KTN1|VAPB|DOCK5	-1	Phosphoproteome_Stukalov_A549-ACE2_24h_Up
GO Biological Processes	19	GO:0048812	neuron projection morphogenesis	19_GO:0032502 developmental process	-2.2	2.4	3.1	30182	457	300	11	3.7	1.1	2017|4131|4684|5058|5747|6654|23022|23077|28988|56288|85440	CTTN|MAP1B|NCAM1|PAK1|PTK2|SOS1|PALLD|MYCBP2|DBNL|PARD3|DOCK7	-1	Phosphoproteome_Stukalov_A549-ACE2_24h_Up
GO Biological Processes	19	GO:0030162	regulation of proteolysis	19_GO:0008152 metabolic process	-2.2	2.1	2.9	30182	726	300	15	5	1.3	1654|4898|5747|5887|6195|6197|6449|6613|7110|8915|9491|23786|54726|54982|79651	DDX3X|NRDC|PTK2|RAD23B|RPS6KA1|RPS6KA3|SGTA|SUMO2|TMF1|BCL10|PSMF1|BCL2L13|OTUD4|CLN6|RHBDF2	-1	Phosphoproteome_Stukalov_A549-ACE2_24h_Up
GO Biological Processes	19	GO:0002833	positive regulation of response to biotic stimulus	19_GO:0048518 positive regulation of biological process	-2.2	2.9	3.2	30182	275	300	8	2.7	0.93	1654|2547|5058|5817|6197|8915|9782|10623	DDX3X|XRCC6|PAK1|PVR|RPS6KA3|BCL10|MATR3|POLR3C	-1	Phosphoproteome_Stukalov_A549-ACE2_24h_Up
GO Biological Processes	19	GO:0007548	sex differentiation	19_GO:0022414 reproductive process	-2.2	2.9	3.2	30182	276	300	8	2.7	0.93	546|1602|4678|5926|7110|8531|8644|9667	ATRX|DACH1|NASP|ARID4A|TMF1|YBX3|AKR1C3|SAFB2	-1	Phosphoproteome_Stukalov_A549-ACE2_24h_Up
KEGG Pathway	24	hsa04022	cGMP-PKG signaling pathway		-2.2	3.6	3.4	30182	167	300	6	2	0.81	490|4659|5331|5594|5605|10398	ATP2B1|PPP1R12A|PLCB3|MAPK1|MAP2K2|MYL9	-1	Phosphoproteome_Stukalov_A549-ACE2_24h_Up
Reactome Gene Sets	6	R-HSA-69481	G2/M Checkpoints		-2.2	3.6	3.4	30182	167	300	6	2	0.81	5707|5883|8924|9491|9656|51720	PSMD1|RAD9A|HERC2|PSMF1|MDC1|UIMC1	-1	Phosphoproteome_Stukalov_A549-ACE2_24h_Up
GO Biological Processes	19	GO:0050673	epithelial cell proliferation	19_GO:0009987 cellular process	-2.2	3.6	3.4	30182	167	300	6	2	0.81	1602|1956|4763|5594|5605|6195	DACH1|EGFR|NF1|MAPK1|MAP2K2|RPS6KA1	-1	Phosphoproteome_Stukalov_A549-ACE2_24h_Up
GO Biological Processes	19	GO:0008406	gonad development	19_GO:0022414 reproductive process	-2.2	3.2	3.3	30182	220	300	7	2.3	0.87	546|4678|5926|7110|8531|8644|9667	ATRX|NASP|ARID4A|TMF1|YBX3|AKR1C3|SAFB2	-1	Phosphoproteome_Stukalov_A549-ACE2_24h_Up
GO Biological Processes	19	GO:0010822	positive regulation of mitochondrion organization	19_GO:0048518 positive regulation of biological process	-2.2	5.4	3.8	30182	75	300	4	1.3	0.66	3064|5599|10928|55737	HTT|MAPK8|RALBP1|VPS35	-1	Phosphoproteome_Stukalov_A549-ACE2_24h_Up
KEGG Pathway	24	hsa05214	Glioma		-2.2	5.4	3.8	30182	75	300	4	1.3	0.66	1956|5594|5605|6654	EGFR|MAPK1|MAP2K2|SOS1	-1	Phosphoproteome_Stukalov_A549-ACE2_24h_Up
GO Biological Processes	19	GO:0001944	vasculature development	19_GO:0032502 developmental process	-2.2	2.3	3	30182	526	300	12	4	1.1	59|71|3726|4763|5587|5594|5747|6654|25865|28982|55742|196528	ACTA2|ACTG1|JUNB|NF1|PRKD1|MAPK1|PTK2|SOS1|PRKD2|FLVCR1|PARVA|ARID2	-1	Phosphoproteome_Stukalov_A549-ACE2_24h_Up
GO Biological Processes	19	GO:0031281	positive regulation of cyclase activity	19_GO:0065007 biological regulation	-2.2	7.7	4.2	30182	39	300	3	1	0.57	4763|5599|10486	NF1|MAPK8|CAP2	-1	Phosphoproteome_Stukalov_A549-ACE2_24h_Up
GO Biological Processes	19	GO:0045740	positive regulation of DNA replication	19_GO:0048518 positive regulation of biological process	-2.2	7.7	4.2	30182	39	300	3	1	0.57	546|1956|58525	ATRX|EGFR|WIZ	-1	Phosphoproteome_Stukalov_A549-ACE2_24h_Up
GO Biological Processes	19	GO:0042307	positive regulation of protein import into nucleus	19_GO:0051179 localization	-2.2	7.7	4.2	30182	39	300	3	1	0.57	5587|7175|10155	PRKD1|TPR|TRIM28	-1	Phosphoproteome_Stukalov_A549-ACE2_24h_Up
GO Biological Processes	19	GO:0070316	regulation of G0 to G1 transition	19_GO:0050789 regulation of biological process	-2.2	7.7	4.2	30182	39	300	3	1	0.57	60|6601|196528	ACTB|SMARCC2|ARID2	-1	Phosphoproteome_Stukalov_A549-ACE2_24h_Up
GO Biological Processes	19	GO:0120039	plasma membrane bounded cell projection morphogenesis	19_GO:0032502 developmental process	-2.2	2.4	3	30182	462	300	11	3.7	1.1	2017|4131|4684|5058|5747|6654|23022|23077|28988|56288|85440	CTTN|MAP1B|NCAM1|PAK1|PTK2|SOS1|PALLD|MYCBP2|DBNL|PARD3|DOCK7	-1	Phosphoproteome_Stukalov_A549-ACE2_24h_Up
GO Biological Processes	19	GO:0001503	ossification	19_GO:0032501 multicellular organismal process	-2.2	2.9	3.2	30182	278	300	8	2.7	0.93	103|1956|2194|3726|4086|4763|10514|28964	ADAR|EGFR|FASN|JUNB|SMAD1|NF1|MYBBP1A|GIT1	-1	Phosphoproteome_Stukalov_A549-ACE2_24h_Up
KEGG Pathway	24	hsa05212	Pancreatic cancer		-2.2	5.3	3.8	30182	76	300	4	1.3	0.66	1956|5594|5599|10928	EGFR|MAPK1|MAPK8|RALBP1	-1	Phosphoproteome_Stukalov_A549-ACE2_24h_Up
KEGG Pathway	24	hsa04971	Gastric acid secretion		-2.2	5.3	3.8	30182	76	300	4	1.3	0.66	60|71|5331|6522	ACTB|ACTG1|PLCB3|SLC4A2	-1	Phosphoproteome_Stukalov_A549-ACE2_24h_Up
Reactome Gene Sets	6	R-HSA-8939211	ESR-mediated signaling		-2.1	3.2	3.2	30182	223	300	7	2.3	0.87	1956|2289|3315|5594|5747|7090|9126	EGFR|FKBP5|HSPB1|MAPK1|PTK2|TLE3|SMC3	-1	Phosphoproteome_Stukalov_A549-ACE2_24h_Up
GO Biological Processes	19	GO:0009267	cellular response to starvation	19_GO:0050896 response to stimulus	-2.1	3.6	3.3	30182	170	300	6	2	0.81	3178|5587|5594|5599|8644|10514	HNRNPA1|PRKD1|MAPK1|MAPK8|AKR1C3|MYBBP1A	-1	Phosphoproteome_Stukalov_A549-ACE2_24h_Up
GO Biological Processes	19	GO:1903034	regulation of response to wounding	19_GO:0050896 response to stimulus	-2.1	3.6	3.3	30182	170	300	6	2	0.81	59|71|5605|5747|23332|28964	ACTA2|ACTG1|MAP2K2|PTK2|CLASP1|GIT1	-1	Phosphoproteome_Stukalov_A549-ACE2_24h_Up
Reactome Gene Sets	6	R-HSA-9013420	RHOU GTPase cycle		-2.1	7.5	4.2	30182	40	300	3	1	0.57	5058|6711|28964	PAK1|SPTBN1|GIT1	-1	Phosphoproteome_Stukalov_A549-ACE2_24h_Up
Canonical Pathways	11	M62	PID EPHB FWD PATHWAY		-2.1	7.5	4.2	30182	40	300	3	1	0.57	5058|5594|5747	PAK1|MAPK1|PTK2	-1	Phosphoproteome_Stukalov_A549-ACE2_24h_Up
GO Biological Processes	19	GO:0031063	regulation of histone deacetylation	19_GO:0008152 metabolic process	-2.1	7.5	4.2	30182	40	300	3	1	0.57	5587|10270|25865	PRKD1|AKAP8|PRKD2	-1	Phosphoproteome_Stukalov_A549-ACE2_24h_Up
GO Biological Processes	19	GO:0071392	cellular response to estradiol stimulus	19_GO:0050896 response to stimulus	-2.1	7.5	4.2	30182	40	300	3	1	0.57	1956|84458|84687	EGFR|LCOR|PPP1R9B	-1	Phosphoproteome_Stukalov_A549-ACE2_24h_Up
Reactome Gene Sets	6	R-HSA-5693565	Recruitment and ATM-mediated phosphorylation of repair and signaling proteins at DNA double strand breaks		-2.1	5.2	3.7	30182	77	300	4	1.3	0.66	5599|8924|9656|51720	MAPK8|HERC2|MDC1|UIMC1	-1	Phosphoproteome_Stukalov_A549-ACE2_24h_Up
KEGG Pathway	24	hsa05100	Bacterial invasion of epithelial cells		-2.1	5.2	3.7	30182	77	300	4	1.3	0.66	60|71|2017|5747	ACTB|ACTG1|CTTN|PTK2	-1	Phosphoproteome_Stukalov_A549-ACE2_24h_Up
Reactome Gene Sets	6	R-HSA-9009391	Extra-nuclear estrogen signaling		-2.1	5.2	3.7	30182	77	300	4	1.3	0.66	1956|3315|5594|5747	EGFR|HSPB1|MAPK1|PTK2	-1	Phosphoproteome_Stukalov_A549-ACE2_24h_Up
GO Biological Processes	19	GO:0033157	regulation of intracellular protein transport	19_GO:0051179 localization	-2.1	3.1	3.2	30182	224	300	7	2.3	0.87	4763|5587|5599|7175|10075|10155|57602	NF1|PRKD1|MAPK8|TPR|HUWE1|TRIM28|USP36	-1	Phosphoproteome_Stukalov_A549-ACE2_24h_Up
GO Biological Processes	19	GO:0048858	cell projection morphogenesis	19_GO:0032502 developmental process	-2.1	2.4	3	30182	467	300	11	3.7	1.1	2017|4131|4684|5058|5747|6654|23022|23077|28988|56288|85440	CTTN|MAP1B|NCAM1|PAK1|PTK2|SOS1|PALLD|MYCBP2|DBNL|PARD3|DOCK7	-1	Phosphoproteome_Stukalov_A549-ACE2_24h_Up
KEGG Pathway	24	hsa04024	cAMP signaling pathway		-2.1	3.1	3.2	30182	225	300	7	2.3	0.87	490|4659|5058|5594|5599|5605|10398	ATP2B1|PPP1R12A|PAK1|MAPK1|MAPK8|MAP2K2|MYL9	-0.99	Phosphoproteome_Stukalov_A549-ACE2_24h_Up
KEGG Pathway	24	hsa05163	Human cytomegalovirus infection		-2.1	3.1	3.2	30182	225	300	7	2.3	0.87	1956|5331|5594|5605|5747|6654|7249	EGFR|PLCB3|MAPK1|MAP2K2|PTK2|SOS1|TSC2	-0.99	Phosphoproteome_Stukalov_A549-ACE2_24h_Up
GO Biological Processes	19	GO:0035239	tube morphogenesis	19_GO:0032502 developmental process	-2.1	2.1	2.9	30182	670	300	14	4.7	1.2	71|1956|3726|4763|5058|5587|5747|6654|7249|8915|23513|25865|55742|196528	ACTG1|EGFR|JUNB|NF1|PAK1|PRKD1|PTK2|SOS1|TSC2|BCL10|SCRIB|PRKD2|PARVA|ARID2	-0.99	Phosphoproteome_Stukalov_A549-ACE2_24h_Up
Reactome Gene Sets	6	R-HSA-5693606	DNA Double Strand Break Response		-2.1	5.2	3.7	30182	78	300	4	1.3	0.66	5599|8924|9656|51720	MAPK8|HERC2|MDC1|UIMC1	-0.99	Phosphoproteome_Stukalov_A549-ACE2_24h_Up
GO Biological Processes	19	GO:0030261	chromosome condensation	19_GO:0009987 cellular process	-2.1	7.4	4.1	30182	41	300	3	1	0.57	10270|22985|51203	AKAP8|ACIN1|NUSAP1	-0.98	Phosphoproteome_Stukalov_A549-ACE2_24h_Up
GO Biological Processes	19	GO:0071470	cellular response to osmotic stress	19_GO:0050896 response to stimulus	-2.1	7.4	4.1	30182	41	300	3	1	0.57	1654|8531|9181	DDX3X|YBX3|ARHGEF2	-0.98	Phosphoproteome_Stukalov_A549-ACE2_24h_Up
GO Biological Processes	19	GO:0033002	muscle cell proliferation	19_GO:0009987 cellular process	-2.1	7.4	4.1	30182	41	300	3	1	0.57	4086|4763|196528	SMAD1|NF1|ARID2	-0.98	Phosphoproteome_Stukalov_A549-ACE2_24h_Up
Reactome Gene Sets	6	R-HSA-165159	MTOR signalling		-2.1	7.4	4.1	30182	41	300	3	1	0.57	6194|7249|84335	RPS6|TSC2|AKT1S1	-0.98	Phosphoproteome_Stukalov_A549-ACE2_24h_Up
Canonical Pathways	11	M214	PID ERBB1 INTERNALIZATION PATHWAY		-2.1	7.4	4.1	30182	41	300	3	1	0.57	1956|5747|6654	EGFR|PTK2|SOS1	-0.98	Phosphoproteome_Stukalov_A549-ACE2_24h_Up
Reactome Gene Sets	6	R-HSA-8875878	MET promotes cell motility		-2.1	7.4	4.1	30182	41	300	3	1	0.57	5747|64759|85440	PTK2|TNS3|DOCK7	-0.98	Phosphoproteome_Stukalov_A549-ACE2_24h_Up
KEGG Pathway	24	hsa05219	Bladder cancer		-2.1	7.4	4.1	30182	41	300	3	1	0.57	1956|5594|5605	EGFR|MAPK1|MAP2K2	-0.98	Phosphoproteome_Stukalov_A549-ACE2_24h_Up
Canonical Pathways	11	M232	PID ECADHERIN STABILIZATION PATHWAY		-2.1	7.4	4.1	30182	41	300	3	1	0.57	1956|7791|28964	EGFR|ZYX|GIT1	-0.98	Phosphoproteome_Stukalov_A549-ACE2_24h_Up
GO Biological Processes	19	GO:0031062	positive regulation of histone methylation	19_GO:0048518 positive regulation of biological process	-2.1	7.4	4.1	30182	41	300	3	1	0.57	4000|7936|55183	LMNA|NELFE|RIF1	-0.98	Phosphoproteome_Stukalov_A549-ACE2_24h_Up
GO Biological Processes	19	GO:0045446	endothelial cell differentiation	19_GO:0032502 developmental process	-2.1	5.1	3.7	30182	79	300	4	1.3	0.66	2194|7082|9414|50848	FASN|TJP1|TJP2|F11R	-0.97	Phosphoproteome_Stukalov_A549-ACE2_24h_Up
Reactome Gene Sets	6	R-HSA-6806834	Signaling by MET		-2.1	5.1	3.7	30182	79	300	4	1.3	0.66	5747|6654|64759|85440	PTK2|SOS1|TNS3|DOCK7	-0.97	Phosphoproteome_Stukalov_A549-ACE2_24h_Up
GO Biological Processes	19	GO:0070828	heterochromatin organization	19_GO:0009987 cellular process	-2.1	5.1	3.7	30182	79	300	4	1.3	0.66	546|1786|4000|55183	ATRX|DNMT1|LMNA|RIF1	-0.97	Phosphoproteome_Stukalov_A549-ACE2_24h_Up
GO Biological Processes	19	GO:0022618	ribonucleoprotein complex assembly	19_GO:0009987 cellular process	-2.1	3.1	3.2	30182	228	300	7	2.3	0.87	103|4839|9169|11218|23195|51747|79833	ADAR|NOP2|SCAF11|DDX20|MDN1|LUC7L3|GEMIN6	-0.97	Phosphoproteome_Stukalov_A549-ACE2_24h_Up
Reactome Gene Sets	6	R-HSA-449147	Signaling by Interleukins		-2.1	2.3	2.9	30182	473	300	11	3.7	1.1	3726|5594|5599|5707|5782|6195|6197|6654|8878|9491|9987	JUNB|MAPK1|MAPK8|PSMD1|PTPN12|RPS6KA1|RPS6KA3|SOS1|SQSTM1|PSMF1|HNRNPDL	-0.97	Phosphoproteome_Stukalov_A549-ACE2_24h_Up
GO Biological Processes	19	GO:1905475	regulation of protein localization to membrane	19_GO:0051179 localization	-2.1	3.4	3.3	30182	175	300	6	2	0.81	60|1956|5599|6711|8878|84687	ACTB|EGFR|MAPK8|SPTBN1|SQSTM1|PPP1R9B	-0.96	Phosphoproteome_Stukalov_A549-ACE2_24h_Up
GO Biological Processes	19	GO:0001952	regulation of cell-matrix adhesion	19_GO:0050789 regulation of biological process	-2.1	4	3.4	30182	125	300	5	1.7	0.74	71|4763|5747|9748|23332	ACTG1|NF1|PTK2|SLK|CLASP1	-0.96	Phosphoproteome_Stukalov_A549-ACE2_24h_Up
Reactome Gene Sets	6	R-HSA-438064	Post NMDA receptor activation events		-2.1	5	3.6	30182	80	300	4	1.3	0.66	5594|6195|6197|28964	MAPK1|RPS6KA1|RPS6KA3|GIT1	-0.96	Phosphoproteome_Stukalov_A549-ACE2_24h_Up
Canonical Pathways	11	M181	PID BMP PATHWAY		-2.1	7.2	4	30182	42	300	3	1	0.57	4086|5594|8021	SMAD1|MAPK1|NUP214	-0.96	Phosphoproteome_Stukalov_A549-ACE2_24h_Up
GO Biological Processes	19	GO:0050920	regulation of chemotaxis	19_GO:0040011 locomotion	-2.1	3.1	3.1	30182	230	300	7	2.3	0.87	3315|5587|5594|5747|23077|25865|65125	HSPB1|PRKD1|MAPK1|PTK2|MYCBP2|PRKD2|WNK1	-0.96	Phosphoproteome_Stukalov_A549-ACE2_24h_Up
GO Biological Processes	19	GO:0002429	immune response-activating cell surface receptor signaling pathway	19_GO:0002376 immune system process	-2.1	3.1	3.1	30182	230	300	7	2.3	0.87	5058|5594|5747|6654|8915|25865|65125	PAK1|MAPK1|PTK2|SOS1|BCL10|PRKD2|WNK1	-0.96	Phosphoproteome_Stukalov_A549-ACE2_24h_Up
GO Biological Processes	19	GO:0010634	positive regulation of epithelial cell migration	19_GO:0040011 locomotion	-2.1	3.4	3.2	30182	176	300	6	2	0.81	3315|5587|5747|23332|25865|80005	HSPB1|PRKD1|PTK2|CLASP1|PRKD2|DOCK5	-0.95	Phosphoproteome_Stukalov_A549-ACE2_24h_Up
Reactome Gene Sets	6	R-HSA-2500257	Resolution of Sister Chromatid Cohesion		-2.1	4	3.4	30182	126	300	5	1.7	0.74	4928|9126|23047|23332|51143	NUP98|SMC3|PDS5B|CLASP1|DYNC1LI1	-0.95	Phosphoproteome_Stukalov_A549-ACE2_24h_Up
GO Biological Processes	19	GO:1902117	positive regulation of organelle assembly	19_GO:0048518 positive regulation of biological process	-2.1	5	3.6	30182	81	300	4	1.3	0.66	3064|4848|4926|25782	HTT|CNOT2|NUMA1|RAB3GAP2	-0.95	Phosphoproteome_Stukalov_A549-ACE2_24h_Up
GO Biological Processes	19	GO:0009451	RNA modification	19_GO:0008152 metabolic process	-2.1	3.4	3.2	30182	177	300	6	2	0.81	16|103|4839|23091|51574|79066	AARS1|ADAR|NOP2|ZC3H13|LARP7|METTL16	-0.95	Phosphoproteome_Stukalov_A549-ACE2_24h_Up
GO Biological Processes	19	GO:0019058	viral life cycle	19_GO:0016032 viral process	-2.1	3.4	3.2	30182	177	300	6	2	0.81	1956|4684|5817|9972|50848|200576	EGFR|NCAM1|PVR|NUP153|F11R|PIKFYVE	-0.95	Phosphoproteome_Stukalov_A549-ACE2_24h_Up
KEGG Pathway	24	hsa05171	Coronavirus disease - COVID-19		-2.1	3	3.1	30182	232	300	7	2.3	0.87	103|1956|5594|5599|6164|6194|6224	ADAR|EGFR|MAPK1|MAPK8|RPL34|RPS6|RPS20	-0.94	Phosphoproteome_Stukalov_A549-ACE2_24h_Up
GO Biological Processes	19	GO:0035303	regulation of dephosphorylation	19_GO:0008152 metabolic process	-2	4	3.4	30182	127	300	5	1.7	0.74	2029|3064|4659|5510|84687	ENSA|HTT|PPP1R12A|PPP1R7|PPP1R9B	-0.94	Phosphoproteome_Stukalov_A549-ACE2_24h_Up
Canonical Pathways	11	M222	PID CXCR3 PATHWAY		-2	7	4	30182	43	300	3	1	0.57	5594|5605|253260	MAPK1|MAP2K2|RICTOR	-0.94	Phosphoproteome_Stukalov_A549-ACE2_24h_Up
Reactome Gene Sets	6	R-HSA-9696270	RND2 GTPase cycle		-2	7	4	30182	43	300	3	1	0.57	392|3895|23513	ARHGAP1|KTN1|SCRIB	-0.94	Phosphoproteome_Stukalov_A549-ACE2_24h_Up
GO Biological Processes	19	GO:0008625	extrinsic apoptotic signaling pathway via death domain receptors	19_GO:0023052 signaling	-2	7	4	30182	43	300	3	1	0.57	1654|4763|51202	DDX3X|NF1|DDX47	-0.94	Phosphoproteome_Stukalov_A549-ACE2_24h_Up
Reactome Gene Sets	6	R-HSA-5696395	Formation of Incision Complex in GG-NER		-2	7	4	30182	43	300	3	1	0.57	5887|6612|6613	RAD23B|SUMO3|SUMO2	-0.94	Phosphoproteome_Stukalov_A549-ACE2_24h_Up
GO Biological Processes	19	GO:0071364	cellular response to epidermal growth factor stimulus	19_GO:0050896 response to stimulus	-2	7	4	30182	43	300	3	1	0.57	1956|5782|84687	EGFR|PTPN12|PPP1R9B	-0.94	Phosphoproteome_Stukalov_A549-ACE2_24h_Up
GO Biological Processes	19	GO:0045663	positive regulation of myoblast differentiation	19_GO:0032502 developmental process	-2	7	4	30182	43	300	3	1	0.57	60|6601|196528	ACTB|SMARCC2|ARID2	-0.94	Phosphoproteome_Stukalov_A549-ACE2_24h_Up
KEGG Pathway	24	hsa04662	B cell receptor signaling pathway		-2	4.9	3.6	30182	82	300	4	1.3	0.66	5594|5605|6654|8915	MAPK1|MAP2K2|SOS1|BCL10	-0.93	Phosphoproteome_Stukalov_A549-ACE2_24h_Up
GO Biological Processes	19	GO:0002757	immune response-activating signaling pathway	19_GO:0002376 immune system process	-2	2.7	3	30182	293	300	8	2.7	0.93	5058|5594|5747|6197|6654|8915|25865|65125	PAK1|MAPK1|PTK2|RPS6KA3|SOS1|BCL10|PRKD2|WNK1	-0.92	Phosphoproteome_Stukalov_A549-ACE2_24h_Up
GO Biological Processes	19	GO:0032535	regulation of cellular component size	19_GO:0065007 biological regulation	-2	2.6	3	30182	354	300	9	3	0.98	119|2017|4131|6711|9368|55604|84335|253260|253725	ADD2|CTTN|MAP1B|SPTBN1|NHERF1|CARMIL1|AKT1S1|RICTOR|WASHC2C	-0.92	Phosphoproteome_Stukalov_A549-ACE2_24h_Up
GO Biological Processes	19	GO:0045216	cell-cell junction organization	19_GO:0009987 cellular process	-2	3.4	3.2	30182	180	300	6	2	0.81	60|71|7082|9414|51599|56288	ACTB|ACTG1|TJP1|TJP2|LSR|PARD3	-0.92	Phosphoproteome_Stukalov_A549-ACE2_24h_Up
GO Biological Processes	19	GO:0007265	Ras protein signal transduction	19_GO:0023052 signaling	-2	3.4	3.2	30182	180	300	6	2	0.81	392|4763|6654|28988|64787|80005	ARHGAP1|NF1|SOS1|DBNL|EPS8L2|DOCK5	-0.92	Phosphoproteome_Stukalov_A549-ACE2_24h_Up
GO Biological Processes	19	GO:0048667	cell morphogenesis involved in neuron differentiation	19_GO:0032502 developmental process	-2	2.4	2.9	30182	418	300	10	3.3	1	4131|4684|5747|6654|9368|23022|23077|23513|56288|85440	MAP1B|NCAM1|PTK2|SOS1|NHERF1|PALLD|MYCBP2|SCRIB|PARD3|DOCK7	-0.92	Phosphoproteome_Stukalov_A549-ACE2_24h_Up
GO Biological Processes	19	GO:0007043	cell-cell junction assembly	19_GO:0009987 cellular process	-2	3.9	3.3	30182	129	300	5	1.7	0.74	60|71|7082|51599|56288	ACTB|ACTG1|TJP1|LSR|PARD3	-0.92	Phosphoproteome_Stukalov_A549-ACE2_24h_Up
GO Biological Processes	19	GO:0050000	chromosome localization	19_GO:0051179 localization	-2	4.8	3.5	30182	83	300	4	1.3	0.66	4000|4928|27436|283489	LMNA|NUP98|EML4|CHAMP1	-0.92	Phosphoproteome_Stukalov_A549-ACE2_24h_Up
GO Biological Processes	19	GO:1902369	negative regulation of RNA catabolic process	19_GO:0048519 negative regulation of biological process	-2	4.8	3.5	30182	83	300	4	1.3	0.66	4904|8531|9967|23367	YBX1|YBX3|THRAP3|LARP1	-0.92	Phosphoproteome_Stukalov_A549-ACE2_24h_Up
GO Biological Processes	19	GO:0035023	regulation of Rho protein signal transduction	19_GO:0023052 signaling	-2	4.8	3.5	30182	83	300	4	1.3	0.66	9181|10928|50848|64787	ARHGEF2|RALBP1|F11R|EPS8L2	-0.92	Phosphoproteome_Stukalov_A549-ACE2_24h_Up
Reactome Gene Sets	6	R-HSA-1660661	Sphingolipid de novo biosynthesis		-2	6.9	3.9	30182	44	300	3	1	0.57	5587|9217|25865	PRKD1|VAPB|PRKD2	-0.92	Phosphoproteome_Stukalov_A549-ACE2_24h_Up
GO Biological Processes	19	GO:0043620	regulation of DNA-templated transcription in response to stress	19_GO:0050896 response to stimulus	-2	6.9	3.9	30182	44	300	3	1	0.57	6195|6197|9774	RPS6KA1|RPS6KA3|BCLAF1	-0.92	Phosphoproteome_Stukalov_A549-ACE2_24h_Up
Canonical Pathways	11	M144	PID CERAMIDE PATHWAY		-2	6.9	3.9	30182	44	300	3	1	0.57	5594|5599|5605	MAPK1|MAPK8|MAP2K2	-0.92	Phosphoproteome_Stukalov_A549-ACE2_24h_Up
GO Biological Processes	19	GO:2000249	regulation of actin cytoskeleton reorganization	19_GO:0050789 regulation of biological process	-2	6.9	3.9	30182	44	300	3	1	0.57	7082|50848|55604	TJP1|F11R|CARMIL1	-0.92	Phosphoproteome_Stukalov_A549-ACE2_24h_Up
GO Biological Processes	19	GO:0018205	peptidyl-lysine modification	19_GO:0008152 metabolic process	-2	2.7	3	30182	294	300	8	2.7	0.93	60|5926|6612|6613|7994|9757|10155|387082	ACTB|ARID4A|SUMO3|SUMO2|KAT6A|KMT2B|TRIM28|SUMO4	-0.92	Phosphoproteome_Stukalov_A549-ACE2_24h_Up
GO Biological Processes	19	GO:0061458	reproductive system development	19_GO:0032502 developmental process	-2	2.7	3	30182	295	300	8	2.7	0.93	546|4678|5926|7110|8531|8644|9667|84687	ATRX|NASP|ARID4A|TMF1|YBX3|AKR1C3|SAFB2|PPP1R9B	-0.91	Phosphoproteome_Stukalov_A549-ACE2_24h_Up
GO Biological Processes	19	GO:0001558	regulation of cell growth	19_GO:0040007 growth	-2	2.4	2.9	30182	420	300	10	3.3	1	1654|1956|2017|4131|6195|6197|9043|51616|84687|253260	DDX3X|EGFR|CTTN|MAP1B|RPS6KA1|RPS6KA3|SPAG9|TAF9B|PPP1R9B|RICTOR	-0.91	Phosphoproteome_Stukalov_A549-ACE2_24h_Up
GO Biological Processes	19	GO:0040008	regulation of growth	19_GO:0040007 growth	-2	2.1	2.8	30182	621	300	13	4.3	1.2	1654|1956|2017|4131|6195|6197|8531|9043|23077|28982|51616|84687|253260	DDX3X|EGFR|CTTN|MAP1B|RPS6KA1|RPS6KA3|YBX3|SPAG9|MYCBP2|FLVCR1|TAF9B|PPP1R9B|RICTOR	-0.91	Phosphoproteome_Stukalov_A549-ACE2_24h_Up
GO Biological Processes	19	GO:0072384	organelle transport along microtubule	19_GO:0051179 localization	-2	4.8	3.5	30182	84	300	4	1.3	0.66	3064|4131|5195|63971	HTT|MAP1B|PEX14|KIF13A	-0.91	Phosphoproteome_Stukalov_A549-ACE2_24h_Up
KEGG Pathway	24	hsa05140	Leishmaniasis		-22	88	33	30182	77	58	13	22	5.5	1915|2353|3108|3109|3113|3115|3117|3119|3122|3123|3127|3725|4792	EEF1A1|FOS|HLA-DMA|HLA-DMB|HLA-DPA1|HLA-DPB1|HLA-DQA1|HLA-DQB1|HLA-DRA|HLA-DRB1|HLA-DRB5|JUN|NFKBIA	-18	RNA_Wilk_CD14+Monocytes_patient-C1B-severe_Down
KEGG Pathway	24	hsa04659	Th17 cell differentiation		-22	67	30	30182	108	58	14	24	5.6	920|2353|3108|3109|3113|3115|3117|3119|3122|3123|3127|3326|3725|4792	CD4|FOS|HLA-DMA|HLA-DMB|HLA-DPA1|HLA-DPB1|HLA-DQA1|HLA-DQB1|HLA-DRA|HLA-DRB1|HLA-DRB5|HSP90AB1|JUN|NFKBIA	-18	RNA_Wilk_CD14+Monocytes_patient-C1B-severe_Down
KEGG Pathway	24	hsa04612	Antigen processing and presentation		-22	87	33	30182	78	58	13	22	5.5	920|972|3108|3109|3113|3115|3117|3119|3122|3123|3127|3312|3326	CD4|CD74|HLA-DMA|HLA-DMB|HLA-DPA1|HLA-DPB1|HLA-DQA1|HLA-DQB1|HLA-DRA|HLA-DRB1|HLA-DRB5|HSPA8|HSP90AB1	-18	RNA_Wilk_CD14+Monocytes_patient-C1B-severe_Down
GO Biological Processes	19	GO:0002503	peptide antigen assembly with MHC class II protein complex	19_GO:0002376 immune system process	-21	290	51	30182	16	58	9	16	4.8	3108|3109|3113|3115|3117|3119|3122|3123|3127	HLA-DMA|HLA-DMB|HLA-DPA1|HLA-DPB1|HLA-DQA1|HLA-DQB1|HLA-DRA|HLA-DRB1|HLA-DRB5	-17	RNA_Wilk_CD14+Monocytes_patient-C1B-severe_Down
GO Biological Processes	19	GO:0002399	MHC class II protein complex assembly	19_GO:0009987 cellular process	-21	290	51	30182	16	58	9	16	4.8	3108|3109|3113|3115|3117|3119|3122|3123|3127	HLA-DMA|HLA-DMB|HLA-DPA1|HLA-DPB1|HLA-DQA1|HLA-DQB1|HLA-DRA|HLA-DRB1|HLA-DRB5	-17	RNA_Wilk_CD14+Monocytes_patient-C1B-severe_Down
KEGG Pathway	24	hsa04658	Th1 and Th2 cell differentiation		-21	74	31	30182	92	58	13	22	5.5	920|2353|3108|3109|3113|3115|3117|3119|3122|3123|3127|3725|4792	CD4|FOS|HLA-DMA|HLA-DMB|HLA-DPA1|HLA-DPB1|HLA-DQA1|HLA-DQB1|HLA-DRA|HLA-DRB1|HLA-DRB5|JUN|NFKBIA	-17	RNA_Wilk_CD14+Monocytes_patient-C1B-severe_Down
KEGG Pathway	24	hsa05166	Human T-cell leukemia virus 1 infection		-21	38	24	30182	222	58	16	28	5.9	293|920|1958|2353|3108|3109|3113|3115|3117|3119|3122|3123|3127|3725|4792|7538	SLC25A6|CD4|EGR1|FOS|HLA-DMA|HLA-DMB|HLA-DPA1|HLA-DPB1|HLA-DQA1|HLA-DQB1|HLA-DRA|HLA-DRB1|HLA-DRB5|JUN|NFKBIA|ZFP36	-17	RNA_Wilk_CD14+Monocytes_patient-C1B-severe_Down
GO Biological Processes	19	GO:0019886	antigen processing and presentation of exogenous peptide antigen via MHC class II	19_GO:0002376 immune system process	-20	170	41	30182	31	58	10	17	5	972|3108|3109|3113|3115|3117|3119|3122|3123|3127	CD74|HLA-DMA|HLA-DMB|HLA-DPA1|HLA-DPB1|HLA-DQA1|HLA-DQB1|HLA-DRA|HLA-DRB1|HLA-DRB5	-16	RNA_Wilk_CD14+Monocytes_patient-C1B-severe_Down
GO Biological Processes	19	GO:0002495	antigen processing and presentation of peptide antigen via MHC class II	19_GO:0002376 immune system process	-20	160	40	30182	33	58	10	17	5	972|3108|3109|3113|3115|3117|3119|3122|3123|3127	CD74|HLA-DMA|HLA-DMB|HLA-DPA1|HLA-DPB1|HLA-DQA1|HLA-DQB1|HLA-DRA|HLA-DRB1|HLA-DRB5	-16	RNA_Wilk_CD14+Monocytes_patient-C1B-severe_Down
GO Biological Processes	19	GO:0002501	peptide antigen assembly with MHC protein complex	19_GO:0002376 immune system process	-20	230	46	30182	20	58	9	16	4.8	3108|3109|3113|3115|3117|3119|3122|3123|3127	HLA-DMA|HLA-DMB|HLA-DPA1|HLA-DPB1|HLA-DQA1|HLA-DQB1|HLA-DRA|HLA-DRB1|HLA-DRB5	-16	RNA_Wilk_CD14+Monocytes_patient-C1B-severe_Down
GO Biological Processes	19	GO:0002396	MHC protein complex assembly	19_GO:0009987 cellular process	-20	230	46	30182	20	58	9	16	4.8	3108|3109|3113|3115|3117|3119|3122|3123|3127	HLA-DMA|HLA-DMB|HLA-DPA1|HLA-DPB1|HLA-DQA1|HLA-DQB1|HLA-DRA|HLA-DRB1|HLA-DRB5	-16	RNA_Wilk_CD14+Monocytes_patient-C1B-severe_Down
GO Biological Processes	19	GO:0002504	antigen processing and presentation of peptide or polysaccharide antigen via MHC class II	19_GO:0002376 immune system process	-19	150	39	30182	34	58	10	17	5	972|3108|3109|3113|3115|3117|3119|3122|3123|3127	CD74|HLA-DMA|HLA-DMB|HLA-DPA1|HLA-DPB1|HLA-DQA1|HLA-DQB1|HLA-DRA|HLA-DRB1|HLA-DRB5	-16	RNA_Wilk_CD14+Monocytes_patient-C1B-severe_Down
GO Biological Processes	19	GO:0002478	antigen processing and presentation of exogenous peptide antigen	19_GO:0002376 immune system process	-19	130	36	30182	40	58	10	17	5	972|3108|3109|3113|3115|3117|3119|3122|3123|3127	CD74|HLA-DMA|HLA-DMB|HLA-DPA1|HLA-DPB1|HLA-DQA1|HLA-DQB1|HLA-DRA|HLA-DRB1|HLA-DRB5	-15	RNA_Wilk_CD14+Monocytes_patient-C1B-severe_Down
GO Biological Processes	19	GO:0019884	antigen processing and presentation of exogenous antigen	19_GO:0002376 immune system process	-18	110	32	30182	49	58	10	17	5	972|3108|3109|3113|3115|3117|3119|3122|3123|3127	CD74|HLA-DMA|HLA-DMB|HLA-DPA1|HLA-DPB1|HLA-DQA1|HLA-DQB1|HLA-DRA|HLA-DRB1|HLA-DRB5	-14	RNA_Wilk_CD14+Monocytes_patient-C1B-severe_Down
KEGG Pathway	24	hsa05310	Asthma		-17	150	37	30182	31	58	9	16	4.8	3108|3109|3113|3115|3117|3119|3122|3123|3127	HLA-DMA|HLA-DMB|HLA-DPA1|HLA-DPB1|HLA-DQA1|HLA-DQB1|HLA-DRA|HLA-DRB1|HLA-DRB5	-14	RNA_Wilk_CD14+Monocytes_patient-C1B-severe_Down
Reactome Gene Sets	6	R-HSA-202430	Translocation of ZAP-70 to Immunological synapse		-17	220	42	30182	19	58	8	14	4.5	920|3113|3115|3117|3119|3122|3123|3127	CD4|HLA-DPA1|HLA-DPB1|HLA-DQA1|HLA-DQB1|HLA-DRA|HLA-DRB1|HLA-DRB5	-14	RNA_Wilk_CD14+Monocytes_patient-C1B-severe_Down
KEGG Pathway	24	hsa05323	Rheumatoid arthritis		-17	62	26	30182	93	58	11	19	5.1	2353|3108|3109|3113|3115|3117|3119|3122|3123|3127|3725	FOS|HLA-DMA|HLA-DMB|HLA-DPA1|HLA-DPB1|HLA-DQA1|HLA-DQB1|HLA-DRA|HLA-DRB1|HLA-DRB5|JUN	-14	RNA_Wilk_CD14+Monocytes_patient-C1B-severe_Down
KEGG Pathway	24	hsa05330	Allograft rejection		-17	120	33	30182	38	58	9	16	4.8	3108|3109|3113|3115|3117|3119|3122|3123|3127	HLA-DMA|HLA-DMB|HLA-DPA1|HLA-DPB1|HLA-DQA1|HLA-DQB1|HLA-DRA|HLA-DRB1|HLA-DRB5	-14	RNA_Wilk_CD14+Monocytes_patient-C1B-severe_Down
Reactome Gene Sets	6	R-HSA-202427	Phosphorylation of CD3 and TCR zeta chains		-16	190	39	30182	22	58	8	14	4.5	920|3113|3115|3117|3119|3122|3123|3127	CD4|HLA-DPA1|HLA-DPB1|HLA-DQA1|HLA-DQB1|HLA-DRA|HLA-DRB1|HLA-DRB5	-13	RNA_Wilk_CD14+Monocytes_patient-C1B-severe_Down
KEGG Pathway	24	hsa05321	Inflammatory bowel disease		-16	80	28	30182	65	58	10	17	5	3108|3109|3113|3115|3117|3119|3122|3123|3127|3725	HLA-DMA|HLA-DMB|HLA-DPA1|HLA-DPB1|HLA-DQA1|HLA-DQB1|HLA-DRA|HLA-DRB1|HLA-DRB5|JUN	-13	RNA_Wilk_CD14+Monocytes_patient-C1B-severe_Down
Reactome Gene Sets	6	R-HSA-389948	PD-1 signaling		-16	180	38	30182	23	58	8	14	4.5	920|3113|3115|3117|3119|3122|3123|3127	CD4|HLA-DPA1|HLA-DPB1|HLA-DQA1|HLA-DQB1|HLA-DRA|HLA-DRB1|HLA-DRB5	-13	RNA_Wilk_CD14+Monocytes_patient-C1B-severe_Down
KEGG Pathway	24	hsa05332	Graft-versus-host disease		-16	110	31	30182	42	58	9	16	4.8	3108|3109|3113|3115|3117|3119|3122|3123|3127	HLA-DMA|HLA-DMB|HLA-DPA1|HLA-DPB1|HLA-DQA1|HLA-DQB1|HLA-DRA|HLA-DRB1|HLA-DRB5	-13	RNA_Wilk_CD14+Monocytes_patient-C1B-severe_Down
GO Biological Processes	19	GO:0048002	antigen processing and presentation of peptide antigen	19_GO:0002376 immune system process	-16	75	27	30182	69	58	10	17	5	972|3108|3109|3113|3115|3117|3119|3122|3123|3127	CD74|HLA-DMA|HLA-DMB|HLA-DPA1|HLA-DPB1|HLA-DQA1|HLA-DQB1|HLA-DRA|HLA-DRB1|HLA-DRB5	-13	RNA_Wilk_CD14+Monocytes_patient-C1B-severe_Down
KEGG Pathway	24	hsa04940	Type I diabetes mellitus		-16	110	31	30182	43	58	9	16	4.8	3108|3109|3113|3115|3117|3119|3122|3123|3127	HLA-DMA|HLA-DMB|HLA-DPA1|HLA-DPB1|HLA-DQA1|HLA-DQB1|HLA-DRA|HLA-DRB1|HLA-DRB5	-13	RNA_Wilk_CD14+Monocytes_patient-C1B-severe_Down
KEGG Pathway	24	hsa05145	Toxoplasmosis		-16	51	23	30182	112	58	11	19	5.1	3108|3109|3113|3115|3117|3119|3122|3123|3127|3312|4792	HLA-DMA|HLA-DMB|HLA-DPA1|HLA-DPB1|HLA-DQA1|HLA-DQB1|HLA-DRA|HLA-DRB1|HLA-DRB5|HSPA8|NFKBIA	-13	RNA_Wilk_CD14+Monocytes_patient-C1B-severe_Down
GO Biological Processes	19	GO:0002381	immunoglobulin production involved in immunoglobulin-mediated immune response	19_GO:0002376 immune system process	-16	100	30	30182	47	58	9	16	4.8	3108|3109|3113|3115|3117|3119|3122|3123|3127	HLA-DMA|HLA-DMB|HLA-DPA1|HLA-DPB1|HLA-DQA1|HLA-DQB1|HLA-DRA|HLA-DRB1|HLA-DRB5	-13	RNA_Wilk_CD14+Monocytes_patient-C1B-severe_Down
KEGG Pathway	24	hsa04672	Intestinal immune network for IgA production		-15	96	29	30182	49	58	9	16	4.8	3108|3109|3113|3115|3117|3119|3122|3123|3127	HLA-DMA|HLA-DMB|HLA-DPA1|HLA-DPB1|HLA-DQA1|HLA-DQB1|HLA-DRA|HLA-DRB1|HLA-DRB5	-13	RNA_Wilk_CD14+Monocytes_patient-C1B-severe_Down
KEGG Pathway	24	hsa05320	Autoimmune thyroid disease		-15	88	28	30182	53	58	9	16	4.8	3108|3109|3113|3115|3117|3119|3122|3123|3127	HLA-DMA|HLA-DMB|HLA-DPA1|HLA-DPB1|HLA-DQA1|HLA-DQB1|HLA-DRA|HLA-DRB1|HLA-DRB5	-12	RNA_Wilk_CD14+Monocytes_patient-C1B-severe_Down
Reactome Gene Sets	6	R-HSA-202433	Generation of second messenger molecules		-15	120	31	30182	34	58	8	14	4.5	920|3113|3115|3117|3119|3122|3123|3127	CD4|HLA-DPA1|HLA-DPB1|HLA-DQA1|HLA-DQB1|HLA-DRA|HLA-DRB1|HLA-DRB5	-12	RNA_Wilk_CD14+Monocytes_patient-C1B-severe_Down
KEGG Pathway	24	hsa05416	Viral myocarditis		-15	78	26	30182	60	58	9	16	4.8	3108|3109|3113|3115|3117|3119|3122|3123|3127	HLA-DMA|HLA-DMB|HLA-DPA1|HLA-DPB1|HLA-DQA1|HLA-DQB1|HLA-DRA|HLA-DRB1|HLA-DRB5	-12	RNA_Wilk_CD14+Monocytes_patient-C1B-severe_Down
Reactome Gene Sets	6	R-HSA-202424	Downstream TCR signaling		-14	53	23	30182	98	58	10	17	5	920|3113|3115|3117|3119|3122|3123|3127|4792|7316	CD4|HLA-DPA1|HLA-DPB1|HLA-DQA1|HLA-DQB1|HLA-DRA|HLA-DRB1|HLA-DRB5|NFKBIA|UBC	-12	RNA_Wilk_CD14+Monocytes_patient-C1B-severe_Down
KEGG Pathway	24	hsa04640	Hematopoietic cell lineage		-14	53	23	30182	99	58	10	17	5	920|3108|3109|3113|3115|3117|3119|3122|3123|3127	CD4|HLA-DMA|HLA-DMB|HLA-DPA1|HLA-DPB1|HLA-DQA1|HLA-DQB1|HLA-DRA|HLA-DRB1|HLA-DRB5	-12	RNA_Wilk_CD14+Monocytes_patient-C1B-severe_Down
GO Biological Processes	19	GO:0019882	antigen processing and presentation	19_GO:0002376 immune system process	-14	52	22	30182	101	58	10	17	5	972|3108|3109|3113|3115|3117|3119|3122|3123|3127	CD74|HLA-DMA|HLA-DMB|HLA-DPA1|HLA-DPB1|HLA-DQA1|HLA-DQB1|HLA-DRA|HLA-DRB1|HLA-DRB5	-12	RNA_Wilk_CD14+Monocytes_patient-C1B-severe_Down
GO Biological Processes	19	GO:0016064	immunoglobulin mediated immune response	19_GO:0002376 immune system process	-14	50	22	30182	104	58	10	17	5	972|3108|3109|3113|3115|3117|3119|3122|3123|3127	CD74|HLA-DMA|HLA-DMB|HLA-DPA1|HLA-DPB1|HLA-DQA1|HLA-DQB1|HLA-DRA|HLA-DRB1|HLA-DRB5	-11	RNA_Wilk_CD14+Monocytes_patient-C1B-severe_Down
GO Biological Processes	19	GO:0019724	B cell mediated immunity	19_GO:0002376 immune system process	-14	48	22	30182	108	58	10	17	5	972|3108|3109|3113|3115|3117|3119|3122|3123|3127	CD74|HLA-DMA|HLA-DMB|HLA-DPA1|HLA-DPB1|HLA-DQA1|HLA-DQB1|HLA-DRA|HLA-DRB1|HLA-DRB5	-11	RNA_Wilk_CD14+Monocytes_patient-C1B-severe_Down
KEGG Pathway	24	hsa05164	Influenza A		-14	33	19	30182	171	58	11	19	5.1	293|3108|3109|3113|3115|3117|3119|3122|3123|3127|4792	SLC25A6|HLA-DMA|HLA-DMB|HLA-DPA1|HLA-DPB1|HLA-DQA1|HLA-DQB1|HLA-DRA|HLA-DRB1|HLA-DRB5|NFKBIA	-11	RNA_Wilk_CD14+Monocytes_patient-C1B-severe_Down
Reactome Gene Sets	6	R-HSA-202403	TCR signaling		-14	43	20	30182	120	58	10	17	5	920|3113|3115|3117|3119|3122|3123|3127|4792|7316	CD4|HLA-DPA1|HLA-DPB1|HLA-DQA1|HLA-DQB1|HLA-DRA|HLA-DRB1|HLA-DRB5|NFKBIA|UBC	-11	RNA_Wilk_CD14+Monocytes_patient-C1B-severe_Down
Reactome Gene Sets	6	R-HSA-2132295	MHC class II antigen presentation		-13	42	20	30182	123	58	10	17	5	972|3109|3113|3115|3117|3119|3122|3123|3127|8905	CD74|HLA-DMB|HLA-DPA1|HLA-DPB1|HLA-DQA1|HLA-DQB1|HLA-DRA|HLA-DRB1|HLA-DRB5|AP1S2	-11	RNA_Wilk_CD14+Monocytes_patient-C1B-severe_Down
KEGG Pathway	24	hsa05322	Systemic lupus erythematosus		-13	38	19	30182	136	58	10	17	5	3021|3108|3109|3113|3115|3117|3119|3122|3123|3127	H3-3B|HLA-DMA|HLA-DMB|HLA-DPA1|HLA-DPB1|HLA-DQA1|HLA-DQB1|HLA-DRA|HLA-DRB1|HLA-DRB5	-10	RNA_Wilk_CD14+Monocytes_patient-C1B-severe_Down
KEGG Pathway	24	hsa05169	Epstein-Barr virus infection		-13	28	17	30182	202	58	11	19	5.1	3108|3109|3113|3115|3117|3119|3122|3123|3127|3725|4792	HLA-DMA|HLA-DMB|HLA-DPA1|HLA-DPB1|HLA-DQA1|HLA-DQB1|HLA-DRA|HLA-DRB1|HLA-DRB5|JUN|NFKBIA	-10	RNA_Wilk_CD14+Monocytes_patient-C1B-severe_Down
KEGG Pathway	24	hsa05150	Staphylococcus aureus infection		-13	49	21	30182	96	58	9	16	4.8	3108|3109|3113|3115|3117|3119|3122|3123|3127	HLA-DMA|HLA-DMB|HLA-DPA1|HLA-DPB1|HLA-DQA1|HLA-DQB1|HLA-DRA|HLA-DRB1|HLA-DRB5	-10	RNA_Wilk_CD14+Monocytes_patient-C1B-severe_Down
Reactome Gene Sets	6	R-HSA-1280215	Cytokine Signaling in Immune system		-12	11	12	30182	730	58	16	28	5.9	920|1958|2353|3113|3115|3117|3119|3122|3123|3127|3312|3725|3726|4170|4792|7316	CD4|EGR1|FOS|HLA-DPA1|HLA-DPB1|HLA-DQA1|HLA-DQB1|HLA-DRA|HLA-DRB1|HLA-DRB5|HSPA8|JUN|JUNB|MCL1|NFKBIA|UBC	-9.8	RNA_Wilk_CD14+Monocytes_patient-C1B-severe_Down
KEGG Pathway	24	hsa04514	Cell adhesion molecules		-12	33	18	30182	157	58	10	17	5	920|3108|3109|3113|3115|3117|3119|3122|3123|3127	CD4|HLA-DMA|HLA-DMB|HLA-DPA1|HLA-DPB1|HLA-DQA1|HLA-DQB1|HLA-DRA|HLA-DRB1|HLA-DRB5	-9.7	RNA_Wilk_CD14+Monocytes_patient-C1B-severe_Down
GO Biological Processes	19	GO:0051249	regulation of lymphocyte activation	19_GO:0002376 immune system process	-12	14	13	30182	503	58	14	24	5.6	677|678|920|972|3108|3109|3113|3115|3117|3119|3122|3123|3127|3726	ZFP36L1|ZFP36L2|CD4|CD74|HLA-DMA|HLA-DMB|HLA-DPA1|HLA-DPB1|HLA-DQA1|HLA-DQB1|HLA-DRA|HLA-DRB1|HLA-DRB5|JUNB	-9.6	RNA_Wilk_CD14+Monocytes_patient-C1B-severe_Down
Reactome Gene Sets	6	R-HSA-388841	Costimulation by the CD28 family		-12	60	22	30182	69	58	8	14	4.5	920|3113|3115|3117|3119|3122|3123|3127	CD4|HLA-DPA1|HLA-DPB1|HLA-DQA1|HLA-DQB1|HLA-DRA|HLA-DRB1|HLA-DRB5	-9.4	RNA_Wilk_CD14+Monocytes_patient-C1B-severe_Down
GO Biological Processes	19	GO:0002449	lymphocyte mediated immunity	19_GO:0002376 immune system process	-12	31	17	30182	170	58	10	17	5	972|3108|3109|3113|3115|3117|3119|3122|3123|3127	CD74|HLA-DMA|HLA-DMB|HLA-DPA1|HLA-DPB1|HLA-DQA1|HLA-DQB1|HLA-DRA|HLA-DRB1|HLA-DRB5	-9.4	RNA_Wilk_CD14+Monocytes_patient-C1B-severe_Down
GO Biological Processes	19	GO:0002460	adaptive immune response based on somatic recombination of immune receptors built from immunoglobulin superfamily domains	19_GO:0002376 immune system process	-12	29	17	30182	177	58	10	17	5	972|3108|3109|3113|3115|3117|3119|3122|3123|3127	CD74|HLA-DMA|HLA-DMB|HLA-DPA1|HLA-DPB1|HLA-DQA1|HLA-DQB1|HLA-DRA|HLA-DRB1|HLA-DRB5	-9.2	RNA_Wilk_CD14+Monocytes_patient-C1B-severe_Down
GO Biological Processes	19	GO:0050870	positive regulation of T cell activation	19_GO:0002376 immune system process	-12	23	15	30182	249	58	11	19	5.1	920|972|3108|3109|3113|3115|3117|3119|3122|3123|3127	CD4|CD74|HLA-DMA|HLA-DMB|HLA-DPA1|HLA-DPB1|HLA-DQA1|HLA-DQB1|HLA-DRA|HLA-DRB1|HLA-DRB5	-9.2	RNA_Wilk_CD14+Monocytes_patient-C1B-severe_Down
KEGG Pathway	24	hsa05152	Tuberculosis		-12	29	16	30182	180	58	10	17	5	972|3108|3109|3113|3115|3117|3119|3122|3123|3127	CD74|HLA-DMA|HLA-DMB|HLA-DPA1|HLA-DPB1|HLA-DQA1|HLA-DQB1|HLA-DRA|HLA-DRB1|HLA-DRB5	-9.2	RNA_Wilk_CD14+Monocytes_patient-C1B-severe_Down
GO Biological Processes	19	GO:1903039	positive regulation of leukocyte cell-cell adhesion	19_GO:0048518 positive regulation of biological process	-11	21	15	30182	273	58	11	19	5.1	920|972|3108|3109|3113|3115|3117|3119|3122|3123|3127	CD4|CD74|HLA-DMA|HLA-DMB|HLA-DPA1|HLA-DPB1|HLA-DQA1|HLA-DQB1|HLA-DRA|HLA-DRB1|HLA-DRB5	-8.8	RNA_Wilk_CD14+Monocytes_patient-C1B-severe_Down
GO Biological Processes	19	GO:2000112	regulation of cellular macromolecule biosynthetic process	19_GO:0008152 metabolic process	-11	12	12	30182	594	58	14	24	5.6	677|678|1938|1975|5935|5997|7538|7832|8663|9314|10209|10399|23645|26986	ZFP36L1|ZFP36L2|EEF2|EIF4B|RBM3|RGS2|ZFP36|BTG2|EIF3C|KLF4|EIF1|RACK1|PPP1R15A|PABPC1	-8.7	RNA_Wilk_CD14+Monocytes_patient-C1B-severe_Down
GO Biological Processes	19	GO:0002694	regulation of leukocyte activation	19_GO:0002376 immune system process	-11	12	12	30182	598	58	14	24	5.6	677|678|920|972|3108|3109|3113|3115|3117|3119|3122|3123|3127|3726	ZFP36L1|ZFP36L2|CD4|CD74|HLA-DMA|HLA-DMB|HLA-DPA1|HLA-DPB1|HLA-DQA1|HLA-DQB1|HLA-DRA|HLA-DRB1|HLA-DRB5|JUNB	-8.7	RNA_Wilk_CD14+Monocytes_patient-C1B-severe_Down
GO Biological Processes	19	GO:0050863	regulation of T cell activation	19_GO:0002376 immune system process	-11	17	13	30182	377	58	12	21	5.3	920|972|3108|3109|3113|3115|3117|3119|3122|3123|3127|3726	CD4|CD74|HLA-DMA|HLA-DMB|HLA-DPA1|HLA-DPB1|HLA-DQA1|HLA-DQB1|HLA-DRA|HLA-DRB1|HLA-DRB5|JUNB	-8.6	RNA_Wilk_CD14+Monocytes_patient-C1B-severe_Down
GO Biological Processes	19	GO:1903037	regulation of leukocyte cell-cell adhesion	19_GO:0050789 regulation of biological process	-11	17	13	30182	378	58	12	21	5.3	920|972|3108|3109|3113|3115|3117|3119|3122|3123|3127|9314	CD4|CD74|HLA-DMA|HLA-DMB|HLA-DPA1|HLA-DPB1|HLA-DQA1|HLA-DQB1|HLA-DRA|HLA-DRB1|HLA-DRB5|KLF4	-8.6	RNA_Wilk_CD14+Monocytes_patient-C1B-severe_Down
GO Biological Processes	19	GO:0006417	regulation of translation	19_GO:0008152 metabolic process	-11	13	12	30182	506	58	13	22	5.5	677|678|1938|1975|5935|5997|7538|7832|8663|10209|10399|23645|26986	ZFP36L1|ZFP36L2|EEF2|EIF4B|RBM3|RGS2|ZFP36|BTG2|EIF3C|EIF1|RACK1|PPP1R15A|PABPC1	-8.4	RNA_Wilk_CD14+Monocytes_patient-C1B-severe_Down
GO Biological Processes	19	GO:0002377	immunoglobulin production	19_GO:0002376 immune system process	-11	31	16	30182	150	58	9	16	4.8	3108|3109|3113|3115|3117|3119|3122|3123|3127	HLA-DMA|HLA-DMB|HLA-DPA1|HLA-DPB1|HLA-DQA1|HLA-DQB1|HLA-DRA|HLA-DRB1|HLA-DRB5	-8.4	RNA_Wilk_CD14+Monocytes_patient-C1B-severe_Down
KEGG Pathway	24	hsa04145	Phagosome		-11	31	16	30182	152	58	9	16	4.8	3108|3109|3113|3115|3117|3119|3122|3123|3127	HLA-DMA|HLA-DMB|HLA-DPA1|HLA-DPB1|HLA-DQA1|HLA-DQB1|HLA-DRA|HLA-DRB1|HLA-DRB5	-8.3	RNA_Wilk_CD14+Monocytes_patient-C1B-severe_Down
GO Biological Processes	19	GO:0002443	leukocyte mediated immunity	19_GO:0002376 immune system process	-11	23	15	30182	224	58	10	17	5	972|3108|3109|3113|3115|3117|3119|3122|3123|3127	CD74|HLA-DMA|HLA-DMB|HLA-DPA1|HLA-DPB1|HLA-DQA1|HLA-DQB1|HLA-DRA|HLA-DRB1|HLA-DRB5	-8.3	RNA_Wilk_CD14+Monocytes_patient-C1B-severe_Down
GO Biological Processes	19	GO:0002440	production of molecular mediator of immune response	19_GO:0002376 immune system process	-11	30	16	30182	155	58	9	16	4.8	3108|3109|3113|3115|3117|3119|3122|3123|3127	HLA-DMA|HLA-DMB|HLA-DPA1|HLA-DPB1|HLA-DQA1|HLA-DQB1|HLA-DRA|HLA-DRB1|HLA-DRB5	-8.3	RNA_Wilk_CD14+Monocytes_patient-C1B-severe_Down
GO Biological Processes	19	GO:0050865	regulation of cell activation	19_GO:0032501 multicellular organismal process	-11	11	11	30182	655	58	14	24	5.6	677|678|920|972|3108|3109|3113|3115|3117|3119|3122|3123|3127|3726	ZFP36L1|ZFP36L2|CD4|CD74|HLA-DMA|HLA-DMB|HLA-DPA1|HLA-DPB1|HLA-DQA1|HLA-DQB1|HLA-DRA|HLA-DRB1|HLA-DRB5|JUNB	-8.2	RNA_Wilk_CD14+Monocytes_patient-C1B-severe_Down
GO Biological Processes	19	GO:0022409	positive regulation of cell-cell adhesion	19_GO:0048518 positive regulation of biological process	-11	18	13	30182	321	58	11	19	5.1	920|972|3108|3109|3113|3115|3117|3119|3122|3123|3127	CD4|CD74|HLA-DMA|HLA-DMB|HLA-DPA1|HLA-DPB1|HLA-DQA1|HLA-DQB1|HLA-DRA|HLA-DRB1|HLA-DRB5	-8.1	RNA_Wilk_CD14+Monocytes_patient-C1B-severe_Down
GO Biological Processes	19	GO:0051251	positive regulation of lymphocyte activation	19_GO:0002376 immune system process	-11	18	13	30182	327	58	11	19	5.1	920|972|3108|3109|3113|3115|3117|3119|3122|3123|3127	CD4|CD74|HLA-DMA|HLA-DMB|HLA-DPA1|HLA-DPB1|HLA-DQA1|HLA-DQB1|HLA-DRA|HLA-DRB1|HLA-DRB5	-8	RNA_Wilk_CD14+Monocytes_patient-C1B-severe_Down
GO Biological Processes	19	GO:0034248	regulation of amide metabolic process	19_GO:0008152 metabolic process	-10	12	11	30182	571	58	13	22	5.5	677|678|1938|1975|5935|5997|7538|7832|8663|10209|10399|23645|26986	ZFP36L1|ZFP36L2|EEF2|EIF4B|RBM3|RGS2|ZFP36|BTG2|EIF3C|EIF1|RACK1|PPP1R15A|PABPC1	-7.8	RNA_Wilk_CD14+Monocytes_patient-C1B-severe_Down
GO Biological Processes	19	GO:0002696	positive regulation of leukocyte activation	19_GO:0002376 immune system process	-9.9	15	12	30182	377	58	11	19	5.1	920|972|3108|3109|3113|3115|3117|3119|3122|3123|3127	CD4|CD74|HLA-DMA|HLA-DMB|HLA-DPA1|HLA-DPB1|HLA-DQA1|HLA-DQB1|HLA-DRA|HLA-DRB1|HLA-DRB5	-7.4	RNA_Wilk_CD14+Monocytes_patient-C1B-severe_Down
GO Biological Processes	19	GO:0022407	regulation of cell-cell adhesion	19_GO:0050789 regulation of biological process	-9.9	13	11	30182	491	58	12	21	5.3	920|972|3108|3109|3113|3115|3117|3119|3122|3123|3127|9314	CD4|CD74|HLA-DMA|HLA-DMB|HLA-DPA1|HLA-DPB1|HLA-DQA1|HLA-DQB1|HLA-DRA|HLA-DRB1|HLA-DRB5|KLF4	-7.4	RNA_Wilk_CD14+Monocytes_patient-C1B-severe_Down
Reactome Gene Sets	6	R-HSA-913531	Interferon Signaling		-9.8	23	14	30182	200	58	9	16	4.8	1958|3113|3115|3117|3119|3122|3123|3127|7316	EGR1|HLA-DPA1|HLA-DPB1|HLA-DQA1|HLA-DQB1|HLA-DRA|HLA-DRB1|HLA-DRB5|UBC	-7.4	RNA_Wilk_CD14+Monocytes_patient-C1B-severe_Down
GO Biological Processes	19	GO:0050867	positive regulation of cell activation	19_GO:0048518 positive regulation of biological process	-9.7	15	12	30182	394	58	11	19	5.1	920|972|3108|3109|3113|3115|3117|3119|3122|3123|3127	CD4|CD74|HLA-DMA|HLA-DMB|HLA-DPA1|HLA-DPB1|HLA-DQA1|HLA-DQB1|HLA-DRA|HLA-DRB1|HLA-DRB5	-7.3	RNA_Wilk_CD14+Monocytes_patient-C1B-severe_Down
GO Biological Processes	19	GO:0030097	hemopoiesis	19_GO:0032502 developmental process	-9.5	10	11	30182	659	58	13	22	5.5	677|678|920|972|1316|1938|1958|2353|3123|3725|3726|7538|9314	ZFP36L1|ZFP36L2|CD4|CD74|KLF6|EEF2|EGR1|FOS|HLA-DRB1|JUN|JUNB|ZFP36|KLF4	-7.1	RNA_Wilk_CD14+Monocytes_patient-C1B-severe_Down
GO Biological Processes	19	GO:1903706	regulation of hemopoiesis	19_GO:0002376 immune system process	-9.4	14	12	30182	415	58	11	19	5.1	677|678|920|972|2353|3122|3123|3726|4792|7071|7538	ZFP36L1|ZFP36L2|CD4|CD74|FOS|HLA-DRA|HLA-DRB1|JUNB|NFKBIA|KLF10|ZFP36	-7	RNA_Wilk_CD14+Monocytes_patient-C1B-severe_Down
Reactome Gene Sets	6	R-HSA-877300	Interferon gamma signaling		-9.3	40	16	30182	92	58	7	12	4.3	3113|3115|3117|3119|3122|3123|3127	HLA-DPA1|HLA-DPB1|HLA-DQA1|HLA-DQB1|HLA-DRA|HLA-DRB1|HLA-DRB5	-6.9	RNA_Wilk_CD14+Monocytes_patient-C1B-severe_Down
GO Biological Processes	19	GO:0002763	positive regulation of myeloid leukocyte differentiation	19_GO:0002376 immune system process	-8.8	53	18	30182	59	58	6	10	4	677|920|972|2353|3123|7071	ZFP36L1|CD4|CD74|FOS|HLA-DRB1|KLF10	-6.4	RNA_Wilk_CD14+Monocytes_patient-C1B-severe_Down
GO Biological Processes	19	GO:0045785	positive regulation of cell adhesion	19_GO:0048518 positive regulation of biological process	-8.7	12	11	30182	482	58	11	19	5.1	920|972|3108|3109|3113|3115|3117|3119|3122|3123|3127	CD4|CD74|HLA-DMA|HLA-DMB|HLA-DPA1|HLA-DPB1|HLA-DQA1|HLA-DQB1|HLA-DRA|HLA-DRB1|HLA-DRB5	-6.4	RNA_Wilk_CD14+Monocytes_patient-C1B-severe_Down
Reactome Gene Sets	6	R-HSA-1280218	Adaptive Immune System		-8.7	8.8	9.6	30182	769	58	13	22	5.5	920|972|3109|3113|3115|3117|3119|3122|3123|3127|4792|7316|8905	CD4|CD74|HLA-DMB|HLA-DPA1|HLA-DPB1|HLA-DQA1|HLA-DQB1|HLA-DRA|HLA-DRB1|HLA-DRB5|NFKBIA|UBC|AP1S2	-6.4	RNA_Wilk_CD14+Monocytes_patient-C1B-severe_Down
GO Biological Processes	19	GO:0045657	positive regulation of monocyte differentiation	19_GO:0002376 immune system process	-8.6	210	29	30182	10	58	4	6.9	3.3	677|920|972|3123	ZFP36L1|CD4|CD74|HLA-DRB1	-6.2	RNA_Wilk_CD14+Monocytes_patient-C1B-severe_Down
KEGG Pathway	24	hsa05168	Herpes simplex virus 1 infection		-8.5	11	10	30182	512	58	11	19	5.1	972|3108|3109|3113|3115|3117|3119|3122|3123|3127|4792	CD74|HLA-DMA|HLA-DMB|HLA-DPA1|HLA-DPB1|HLA-DQA1|HLA-DQB1|HLA-DRA|HLA-DRB1|HLA-DRB5|NFKBIA	-6.1	RNA_Wilk_CD14+Monocytes_patient-C1B-severe_Down
GO Biological Processes	19	GO:0002252	immune effector process	19_GO:0002376 immune system process	-8.5	13	11	30182	389	58	10	17	5	972|3108|3109|3113|3115|3117|3119|3122|3123|3127	CD74|HLA-DMA|HLA-DMB|HLA-DPA1|HLA-DPB1|HLA-DQA1|HLA-DQB1|HLA-DRA|HLA-DRB1|HLA-DRB5	-6.1	RNA_Wilk_CD14+Monocytes_patient-C1B-severe_Down
Canonical Pathways	11	M167	PID AP1 PATHWAY		-8.3	45	16	30182	70	58	6	10	4	1843|1958|2353|2354|3725|3726	DUSP1|EGR1|FOS|FOSB|JUN|JUNB	-6	RNA_Wilk_CD14+Monocytes_patient-C1B-severe_Down
GO Biological Processes	19	GO:0002521	leukocyte differentiation	19_GO:0032502 developmental process	-8.3	13	11	30182	406	58	10	17	5	677|678|920|972|1316|1958|2353|3123|3725|3726	ZFP36L1|ZFP36L2|CD4|CD74|KLF6|EGR1|FOS|HLA-DRB1|JUN|JUNB	-6	RNA_Wilk_CD14+Monocytes_patient-C1B-severe_Down
GO Biological Processes	19	GO:0045637	regulation of myeloid cell differentiation	19_GO:0002376 immune system process	-8.1	19	12	30182	214	58	8	14	4.5	677|920|972|2353|3123|4792|7071|7538	ZFP36L1|CD4|CD74|FOS|HLA-DRB1|NFKBIA|KLF10|ZFP36	-5.8	RNA_Wilk_CD14+Monocytes_patient-C1B-severe_Down
GO Biological Processes	19	GO:1902105	regulation of leukocyte differentiation	19_GO:0002376 immune system process	-8	15	11	30182	319	58	9	16	4.8	677|678|920|972|2353|3122|3123|3726|7071	ZFP36L1|ZFP36L2|CD4|CD74|FOS|HLA-DRA|HLA-DRB1|JUNB|KLF10	-5.7	RNA_Wilk_CD14+Monocytes_patient-C1B-severe_Down
GO Biological Processes	19	GO:0071345	cellular response to cytokine stimulus	19_GO:0050896 response to stimulus	-8	8.7	9.2	30182	719	58	12	21	5.3	677|678|920|972|1843|1958|2353|3113|3326|4792|7538|9314	ZFP36L1|ZFP36L2|CD4|CD74|DUSP1|EGR1|FOS|HLA-DPA1|HSP90AB1|NFKBIA|ZFP36|KLF4	-5.7	RNA_Wilk_CD14+Monocytes_patient-C1B-severe_Down
GO Biological Processes	19	GO:0002250	adaptive immune response	19_GO:0002376 immune system process	-7.9	9.9	9.5	30182	581	58	11	19	5.1	920|972|3108|3109|3113|3115|3117|3119|3122|3123|3127	CD4|CD74|HLA-DMA|HLA-DMB|HLA-DPA1|HLA-DPB1|HLA-DQA1|HLA-DQB1|HLA-DRA|HLA-DRB1|HLA-DRB5	-5.6	RNA_Wilk_CD14+Monocytes_patient-C1B-severe_Down
GO Biological Processes	19	GO:1900153	positive regulation of nuclear-transcribed mRNA catabolic process, deadenylation-dependent decay	19_GO:0048519 negative regulation of biological process	-7.8	140	23	30182	15	58	4	6.9	3.3	677|678|7538|26986	ZFP36L1|ZFP36L2|ZFP36|PABPC1	-5.5	RNA_Wilk_CD14+Monocytes_patient-C1B-severe_Down
GO Biological Processes	19	GO:0071364	cellular response to epidermal growth factor stimulus	19_GO:0050896 response to stimulus	-7.7	61	17	30182	43	58	5	8.6	3.7	677|678|1915|2353|7538	ZFP36L1|ZFP36L2|EEF1A1|FOS|ZFP36	-5.4	RNA_Wilk_CD14+Monocytes_patient-C1B-severe_Down
GO Biological Processes	19	GO:1903313	positive regulation of mRNA metabolic process	19_GO:0048518 positive regulation of biological process	-7.7	23	12	30182	157	58	7	12	4.3	677|678|3312|5935|7538|7832|26986	ZFP36L1|ZFP36L2|HSPA8|RBM3|ZFP36|BTG2|PABPC1	-5.4	RNA_Wilk_CD14+Monocytes_patient-C1B-severe_Down
GO Biological Processes	19	GO:0070849	response to epidermal growth factor	19_GO:0050896 response to stimulus	-7.5	55	16	30182	47	58	5	8.6	3.7	677|678|1915|2353|7538	ZFP36L1|ZFP36L2|EEF1A1|FOS|ZFP36	-5.3	RNA_Wilk_CD14+Monocytes_patient-C1B-severe_Down
GO Biological Processes	19	GO:0045639	positive regulation of myeloid cell differentiation	19_GO:0002376 immune system process	-7.3	30	13	30182	103	58	6	10	4	677|920|972|2353|3123|7071	ZFP36L1|CD4|CD74|FOS|HLA-DRB1|KLF10	-5.1	RNA_Wilk_CD14+Monocytes_patient-C1B-severe_Down
GO Biological Processes	19	GO:0070848	response to growth factor	19_GO:0050896 response to stimulus	-7.3	10	9.1	30182	520	58	10	17	5	677|678|1915|1958|2353|3725|7538|9314|9592|10399	ZFP36L1|ZFP36L2|EEF1A1|EGR1|FOS|JUN|ZFP36|KLF4|IER2|RACK1	-5.1	RNA_Wilk_CD14+Monocytes_patient-C1B-severe_Down
GO Biological Processes	19	GO:0045655	regulation of monocyte differentiation	19_GO:0002376 immune system process	-7.2	100	20	30182	20	58	4	6.9	3.3	677|920|972|3123	ZFP36L1|CD4|CD74|HLA-DRB1	-5.1	RNA_Wilk_CD14+Monocytes_patient-C1B-severe_Down
GO Biological Processes	19	GO:1903708	positive regulation of hemopoiesis	19_GO:0002376 immune system process	-7.2	20	11	30182	184	58	7	12	4.3	677|920|972|2353|3122|3123|7071	ZFP36L1|CD4|CD74|FOS|HLA-DRA|HLA-DRB1|KLF10	-5	RNA_Wilk_CD14+Monocytes_patient-C1B-severe_Down
GO Biological Processes	19	GO:1902107	positive regulation of leukocyte differentiation	19_GO:0002376 immune system process	-7.2	20	11	30182	184	58	7	12	4.3	677|920|972|2353|3122|3123|7071	ZFP36L1|CD4|CD74|FOS|HLA-DRA|HLA-DRB1|KLF10	-5	RNA_Wilk_CD14+Monocytes_patient-C1B-severe_Down
Reactome Gene Sets	6	R-HSA-9613829	Chaperone Mediated Autophagy		-7.1	95	19	30182	22	58	4	6.9	3.3	1915|3312|3326|7316	EEF1A1|HSPA8|HSP90AB1|UBC	-4.9	RNA_Wilk_CD14+Monocytes_patient-C1B-severe_Down
GO Biological Processes	19	GO:0002761	regulation of myeloid leukocyte differentiation	19_GO:0002376 immune system process	-6.9	25	12	30182	123	58	6	10	4	677|920|972|2353|3123|7071	ZFP36L1|CD4|CD74|FOS|HLA-DRB1|KLF10	-4.7	RNA_Wilk_CD14+Monocytes_patient-C1B-severe_Down
GO Biological Processes	19	GO:1900151	regulation of nuclear-transcribed mRNA catabolic process, deadenylation-dependent decay	19_GO:0048519 negative regulation of biological process	-6.8	80	18	30182	26	58	4	6.9	3.3	677|678|7538|26986	ZFP36L1|ZFP36L2|ZFP36|PABPC1	-4.6	RNA_Wilk_CD14+Monocytes_patient-C1B-severe_Down
GO Biological Processes	19	GO:1903131	mononuclear cell differentiation	19_GO:0032502 developmental process	-6.7	13	9.4	30182	324	58	8	14	4.5	677|678|920|972|1316|1958|2353|3725	ZFP36L1|ZFP36L2|CD4|CD74|KLF6|EGR1|FOS|JUN	-4.6	RNA_Wilk_CD14+Monocytes_patient-C1B-severe_Down
GO Biological Processes	19	GO:1903311	regulation of mRNA metabolic process	19_GO:0008152 metabolic process	-6.7	13	9.3	30182	329	58	8	14	4.5	677|678|3312|5935|7538|7832|9584|26986	ZFP36L1|ZFP36L2|HSPA8|RBM3|ZFP36|BTG2|RBM39|PABPC1	-4.6	RNA_Wilk_CD14+Monocytes_patient-C1B-severe_Down
GO Biological Processes	19	GO:0071363	cellular response to growth factor stimulus	19_GO:0050896 response to stimulus	-6.4	9.6	8.4	30182	488	58	9	16	4.8	677|678|1915|1958|2353|3725|7538|9314|10399	ZFP36L1|ZFP36L2|EEF1A1|EGR1|FOS|JUN|ZFP36|KLF4|RACK1	-4.4	RNA_Wilk_CD14+Monocytes_patient-C1B-severe_Down
Canonical Pathways	11	M290	PID IL12 STAT4 PATHWAY		-6.4	65	16	30182	32	58	4	6.9	3.3	920|2353|3122|3725	CD4|FOS|HLA-DRA|JUN	-4.3	RNA_Wilk_CD14+Monocytes_patient-C1B-severe_Down
GO Biological Processes	19	GO:0097011	cellular response to granulocyte macrophage colony-stimulating factor stimulus	19_GO:0050896 response to stimulus	-6.3	170	23	30182	9	58	3	5.2	2.9	678|920|7538	ZFP36L2|CD4|ZFP36	-4.2	RNA_Wilk_CD14+Monocytes_patient-C1B-severe_Down
GO Biological Processes	19	GO:0097012	response to granulocyte macrophage colony-stimulating factor	19_GO:0050896 response to stimulus	-6.3	170	23	30182	9	58	3	5.2	2.9	678|920|7538	ZFP36L2|CD4|ZFP36	-4.2	RNA_Wilk_CD14+Monocytes_patient-C1B-severe_Down
Reactome Gene Sets	6	R-HSA-450531	Regulation of mRNA stability by proteins that bind AU-rich elements		-6.1	30	12	30182	88	58	5	8.6	3.7	677|3312|7316|7538|26986	ZFP36L1|HSPA8|UBC|ZFP36|PABPC1	-4.1	RNA_Wilk_CD14+Monocytes_patient-C1B-severe_Down
Reactome Gene Sets	6	R-HSA-9031628	NGF-stimulated transcription		-6	53	14	30182	39	58	4	6.9	3.3	1958|2353|2354|3726	EGR1|FOS|FOSB|JUNB	-4	RNA_Wilk_CD14+Monocytes_patient-C1B-severe_Down
GO Biological Processes	19	GO:0043549	regulation of kinase activity	19_GO:0008152 metabolic process	-6	7.2	7.4	30182	720	58	10	17	5	920|972|1843|1915|1958|2950|3123|3326|5997|10399	CD4|CD74|DUSP1|EEF1A1|EGR1|GSTP1|HLA-DRB1|HSP90AB1|RGS2|RACK1	-4	RNA_Wilk_CD14+Monocytes_patient-C1B-severe_Down
KEGG Pathway	24	hsa04657	IL-17 signaling pathway		-6	28	11	30182	94	58	5	8.6	3.7	2353|2354|3326|3725|4792	FOS|FOSB|HSP90AB1|JUN|NFKBIA	-4	RNA_Wilk_CD14+Monocytes_patient-C1B-severe_Down
GO Biological Processes	19	GO:0048545	response to steroid hormone	19_GO:0050896 response to stimulus	-5.9	13	8.8	30182	284	58	7	12	4.3	677|678|2353|2354|3312|7538|10628	ZFP36L1|ZFP36L2|FOS|FOSB|HSPA8|ZFP36|TXNIP	-3.9	RNA_Wilk_CD14+Monocytes_patient-C1B-severe_Down
GO Biological Processes	19	GO:0000956	nuclear-transcribed mRNA catabolic process	19_GO:0048519 negative regulation of biological process	-5.8	26	11	30182	101	58	5	8.6	3.7	677|678|7538|10957|26986	ZFP36L1|ZFP36L2|ZFP36|PNRC1|PABPC1	-3.8	RNA_Wilk_CD14+Monocytes_patient-C1B-severe_Down
GO Biological Processes	19	GO:0010720	positive regulation of cell development	19_GO:0032502 developmental process	-5.8	9.6	7.9	30182	432	58	8	14	4.5	677|920|972|2353|3122|3123|4673|7071	ZFP36L1|CD4|CD74|FOS|HLA-DRA|HLA-DRB1|NAP1L1|KLF10	-3.8	RNA_Wilk_CD14+Monocytes_patient-C1B-severe_Down
Canonical Pathways	11	M60	PID NFAT TFPATHWAY		-5.8	46	13	30182	45	58	4	6.9	3.3	1958|2353|3725|3726	EGR1|FOS|JUN|JUNB	-3.8	RNA_Wilk_CD14+Monocytes_patient-C1B-severe_Down
Canonical Pathways	11	M164	PID ERBB1 DOWNSTREAM PATHWAY		-5.7	25	11	30182	105	58	5	8.6	3.7	1843|1958|2353|3725|7538	DUSP1|EGR1|FOS|JUN|ZFP36	-3.8	RNA_Wilk_CD14+Monocytes_patient-C1B-severe_Down
GO Biological Processes	19	GO:0060213	positive regulation of nuclear-transcribed mRNA poly(A) tail shortening	19_GO:0048519 negative regulation of biological process	-5.7	120	19	30182	13	58	3	5.2	2.9	7538|7832|26986	ZFP36|BTG2|PABPC1	-3.8	RNA_Wilk_CD14+Monocytes_patient-C1B-severe_Down
Canonical Pathways	11	M183	PID IL6 7 PATHWAY		-5.7	44	13	30182	47	58	4	6.9	3.3	2353|3725|3726|4170	FOS|JUN|JUNB|MCL1	-3.7	RNA_Wilk_CD14+Monocytes_patient-C1B-severe_Down
Reactome Gene Sets	6	R-HSA-2262752	Cellular responses to stress		-5.6	6.6	7	30182	789	58	10	17	5	1915|2353|2950|3021|3312|3326|3725|7316|10628|23645	EEF1A1|FOS|GSTP1|H3-3B|HSPA8|HSP90AB1|JUN|UBC|TXNIP|PPP1R15A	-3.7	RNA_Wilk_CD14+Monocytes_patient-C1B-severe_Down
GO Biological Processes	19	GO:0046598	positive regulation of viral entry into host cell	19_GO:0016032 viral process	-5.6	110	18	30182	14	58	3	5.2	2.9	920|972|3123	CD4|CD74|HLA-DRB1	-3.7	RNA_Wilk_CD14+Monocytes_patient-C1B-severe_Down
GO Biological Processes	19	GO:0075294	positive regulation by symbiont of entry into host	19_GO:0044419 biological process involved in interspecies interaction between organisms	-5.6	110	18	30182	14	58	3	5.2	2.9	920|972|3123	CD4|CD74|HLA-DRB1	-3.7	RNA_Wilk_CD14+Monocytes_patient-C1B-severe_Down
GO Biological Processes	19	GO:1902895	positive regulation of miRNA transcription	19_GO:0048518 positive regulation of biological process	-5.5	41	12	30182	51	58	4	6.9	3.3	1958|2353|3725|9314	EGR1|FOS|JUN|KLF4	-3.6	RNA_Wilk_CD14+Monocytes_patient-C1B-severe_Down
GO Biological Processes	19	GO:0060211	regulation of nuclear-transcribed mRNA poly(A) tail shortening	19_GO:0048519 negative regulation of biological process	-5.5	100	18	30182	15	58	3	5.2	2.9	7538|7832|26986	ZFP36|BTG2|PABPC1	-3.6	RNA_Wilk_CD14+Monocytes_patient-C1B-severe_Down
GO Biological Processes	19	GO:0061014	positive regulation of mRNA catabolic process	19_GO:0048519 negative regulation of biological process	-5.5	22	10	30182	118	58	5	8.6	3.7	677|678|7538|7832|26986	ZFP36L1|ZFP36L2|ZFP36|BTG2|PABPC1	-3.6	RNA_Wilk_CD14+Monocytes_patient-C1B-severe_Down
Reactome Gene Sets	6	R-HSA-449147	Signaling by Interleukins		-5.5	8.8	7.5	30182	473	58	8	14	4.5	920|2353|3312|3725|3726|4170|4792|7316	CD4|FOS|HSPA8|JUN|JUNB|MCL1|NFKBIA|UBC	-3.6	RNA_Wilk_CD14+Monocytes_patient-C1B-severe_Down
GO Biological Processes	19	GO:0045619	regulation of lymphocyte differentiation	19_GO:0002376 immune system process	-5.5	15	8.8	30182	212	58	6	10	4	677|678|972|3122|3123|3726	ZFP36L1|ZFP36L2|CD74|HLA-DRA|HLA-DRB1|JUNB	-3.6	RNA_Wilk_CD14+Monocytes_patient-C1B-severe_Down
GO Biological Processes	19	GO:0009612	response to mechanical stimulus	19_GO:0050896 response to stimulus	-5.4	15	8.7	30182	215	58	6	10	4	2353|2354|3725|4792|7832|10628	FOS|FOSB|JUN|NFKBIA|BTG2|TXNIP	-3.5	RNA_Wilk_CD14+Monocytes_patient-C1B-severe_Down
GO Biological Processes	19	GO:0006402	mRNA catabolic process	19_GO:0048519 negative regulation of biological process	-5.4	21	9.8	30182	123	58	5	8.6	3.7	677|678|7538|10957|26986	ZFP36L1|ZFP36L2|ZFP36|PNRC1|PABPC1	-3.5	RNA_Wilk_CD14+Monocytes_patient-C1B-severe_Down
GO Biological Processes	19	GO:0061158	3'-UTR-mediated mRNA destabilization	19_GO:0048519 negative regulation of biological process	-5.3	92	16	30182	17	58	3	5.2	2.9	677|678|7538	ZFP36L1|ZFP36L2|ZFP36	-3.5	RNA_Wilk_CD14+Monocytes_patient-C1B-severe_Down
KEGG Pathway	24	hsa04380	Osteoclast differentiation		-5.3	20	9.6	30182	128	58	5	8.6	3.7	2353|2354|3725|3726|4792	FOS|FOSB|JUN|JUNB|NFKBIA	-3.4	RNA_Wilk_CD14+Monocytes_patient-C1B-severe_Down
Reactome Gene Sets	6	R-HSA-72649	Translation initiation complex formation		-5.3	35	12	30182	59	58	4	6.9	3.3	1975|8663|26986|51386	EIF4B|EIF3C|PABPC1|EIF3L	-3.4	RNA_Wilk_CD14+Monocytes_patient-C1B-severe_Down
Canonical Pathways	11	M166	PID ATF2 PATHWAY		-5.3	35	12	30182	59	58	4	6.9	3.3	1843|2353|3725|3726	DUSP1|FOS|JUN|JUNB	-3.4	RNA_Wilk_CD14+Monocytes_patient-C1B-severe_Down
Reactome Gene Sets	6	R-HSA-72662	Activation of the mRNA upon binding of the cap-binding complex and eIFs, and subsequent binding to 43S		-5.3	35	11	30182	60	58	4	6.9	3.3	1975|8663|26986|51386	EIF4B|EIF3C|PABPC1|EIF3L	-3.4	RNA_Wilk_CD14+Monocytes_patient-C1B-severe_Down
GO Biological Processes	19	GO:2000630	positive regulation of miRNA metabolic process	19_GO:0048518 positive regulation of biological process	-5.3	35	11	30182	60	58	4	6.9	3.3	1958|2353|3725|9314	EGR1|FOS|JUN|KLF4	-3.4	RNA_Wilk_CD14+Monocytes_patient-C1B-severe_Down
Reactome Gene Sets	6	R-HSA-198725	Nuclear Events (kinase and transcription factor activation)		-5.2	34	11	30182	61	58	4	6.9	3.3	1958|2353|2354|3726	EGR1|FOS|FOSB|JUNB	-3.4	RNA_Wilk_CD14+Monocytes_patient-C1B-severe_Down
Reactome Gene Sets	6	R-HSA-8876725	Protein methylation		-5.2	82	16	30182	19	58	3	5.2	2.9	1915|1938|3312	EEF1A1|EEF2|HSPA8	-3.3	RNA_Wilk_CD14+Monocytes_patient-C1B-severe_Down
GO Biological Processes	19	GO:0008283	cell population proliferation	19_GO:0009987 cellular process	-5.2	6.7	6.7	30182	699	58	9	16	4.8	677|972|1958|2353|2950|3725|3726|7045|7832	ZFP36L1|CD74|EGR1|FOS|GSTP1|JUN|JUNB|TGFBI|BTG2	-3.3	RNA_Wilk_CD14+Monocytes_patient-C1B-severe_Down
GO Biological Processes	19	GO:0048524	positive regulation of viral process	19_GO:0016032 viral process	-5.1	33	11	30182	64	58	4	6.9	3.3	920|972|3123|26986	CD4|CD74|HLA-DRB1|PABPC1	-3.3	RNA_Wilk_CD14+Monocytes_patient-C1B-severe_Down
KEGG Pathway	24	hsa05162	Measles		-5.1	19	9.2	30182	139	58	5	8.6	3.7	2353|3312|3725|4792|10399	FOS|HSPA8|JUN|NFKBIA|RACK1	-3.3	RNA_Wilk_CD14+Monocytes_patient-C1B-severe_Down
KEGG Pathway	24	hsa05418	Fluid shear stress and atherosclerosis		-5.1	19	9.2	30182	139	58	5	8.6	3.7	1843|2353|2950|3326|3725	DUSP1|FOS|GSTP1|HSP90AB1|JUN	-3.3	RNA_Wilk_CD14+Monocytes_patient-C1B-severe_Down
GO Biological Processes	19	GO:0002573	myeloid leukocyte differentiation	19_GO:0032502 developmental process	-5.1	19	9.2	30182	140	58	5	8.6	3.7	920|2353|3123|3725|3726	CD4|FOS|HLA-DRB1|JUN|JUNB	-3.3	RNA_Wilk_CD14+Monocytes_patient-C1B-severe_Down
Canonical Pathways	11	M272	PID CD8 TCR DOWNSTREAM PATHWAY		-5.1	32	11	30182	65	58	4	6.9	3.3	1958|2353|3725|3726	EGR1|FOS|JUN|JUNB	-3.3	RNA_Wilk_CD14+Monocytes_patient-C1B-severe_Down
GO Biological Processes	19	GO:0045727	positive regulation of translation	19_GO:0048518 positive regulation of biological process	-5.1	18	9.1	30182	141	58	5	8.6	3.7	1938|5935|8663|23645|26986	EEF2|RBM3|EIF3C|PPP1R15A|PABPC1	-3.3	RNA_Wilk_CD14+Monocytes_patient-C1B-severe_Down
GO Biological Processes	19	GO:0051384	response to glucocorticoid	19_GO:0050896 response to stimulus	-5.1	18	9.1	30182	142	58	5	8.6	3.7	677|678|2353|2354|7538	ZFP36L1|ZFP36L2|FOS|FOSB|ZFP36	-3.2	RNA_Wilk_CD14+Monocytes_patient-C1B-severe_Down
GO Biological Processes	19	GO:1902893	regulation of miRNA transcription	19_GO:0008152 metabolic process	-5	31	11	30182	68	58	4	6.9	3.3	1958|2353|3725|9314	EGR1|FOS|JUN|KLF4	-3.2	RNA_Wilk_CD14+Monocytes_patient-C1B-severe_Down
GO Biological Processes	19	GO:0051592	response to calcium ion	19_GO:0050896 response to stimulus	-5	17	8.8	30182	149	58	5	8.6	3.7	2353|2354|3725|3726|10628	FOS|FOSB|JUN|JUNB|TXNIP	-3.2	RNA_Wilk_CD14+Monocytes_patient-C1B-severe_Down
Reactome Gene Sets	6	R-HSA-9018519	Estrogen-dependent gene expression		-5	17	8.8	30182	150	58	5	8.6	3.7	2353|2354|3021|3326|3725	FOS|FOSB|H3-3B|HSP90AB1|JUN	-3.2	RNA_Wilk_CD14+Monocytes_patient-C1B-severe_Down
GO Biological Processes	19	GO:0017148	negative regulation of translation	19_GO:0048519 negative regulation of biological process	-4.9	12	7.7	30182	268	58	6	10	4	677|678|5997|7538|7832|10399	ZFP36L1|ZFP36L2|RGS2|ZFP36|BTG2|RACK1	-3.1	RNA_Wilk_CD14+Monocytes_patient-C1B-severe_Down
GO Biological Processes	19	GO:0070663	regulation of leukocyte proliferation	19_GO:0050789 regulation of biological process	-4.9	12	7.7	30182	268	58	6	10	4	972|2950|3109|3113|3115|3123	CD74|GSTP1|HLA-DMB|HLA-DPA1|HLA-DPB1|HLA-DRB1	-3.1	RNA_Wilk_CD14+Monocytes_patient-C1B-severe_Down
GO Biological Processes	19	GO:1903902	positive regulation of viral life cycle	19_GO:0016032 viral process	-4.9	65	14	30182	24	58	3	5.2	2.9	920|972|3123	CD4|CD74|HLA-DRB1	-3.1	RNA_Wilk_CD14+Monocytes_patient-C1B-severe_Down
GO Biological Processes	19	GO:0030099	myeloid cell differentiation	19_GO:0032502 developmental process	-4.8	11	7.6	30182	273	58	6	10	4	920|2353|3123|3725|3726|7538	CD4|FOS|HLA-DRB1|JUN|JUNB|ZFP36	-3	RNA_Wilk_CD14+Monocytes_patient-C1B-severe_Down
GO Biological Processes	19	GO:0006401	RNA catabolic process	19_GO:0008152 metabolic process	-4.8	16	8.5	30182	161	58	5	8.6	3.7	677|678|7538|10957|26986	ZFP36L1|ZFP36L2|ZFP36|PNRC1|PABPC1	-3	RNA_Wilk_CD14+Monocytes_patient-C1B-severe_Down
GO Biological Processes	19	GO:0030098	lymphocyte differentiation	19_GO:0002376 immune system process	-4.8	11	7.5	30182	280	58	6	10	4	677|678|920|972|1316|1958	ZFP36L1|ZFP36L2|CD4|CD74|KLF6|EGR1	-3	RNA_Wilk_CD14+Monocytes_patient-C1B-severe_Down
GO Biological Processes	19	GO:0050792	regulation of viral process	19_GO:0016032 viral process	-4.8	16	8.3	30182	165	58	5	8.6	3.7	920|972|3123|7538|26986	CD4|CD74|HLA-DRB1|ZFP36|PABPC1	-3	RNA_Wilk_CD14+Monocytes_patient-C1B-severe_Down
GO Biological Processes	19	GO:0035994	response to muscle stretch	19_GO:0050896 response to stimulus	-4.8	60	13	30182	26	58	3	5.2	2.9	2353|3725|4792	FOS|JUN|NFKBIA	-3	RNA_Wilk_CD14+Monocytes_patient-C1B-severe_Down
GO Biological Processes	19	GO:0031960	response to corticosteroid	19_GO:0050896 response to stimulus	-4.8	16	8.3	30182	166	58	5	8.6	3.7	677|678|2353|2354|7538	ZFP36L1|ZFP36L2|FOS|FOSB|ZFP36	-3	RNA_Wilk_CD14+Monocytes_patient-C1B-severe_Down
GO Biological Processes	19	GO:0009725	response to hormone	19_GO:0050896 response to stimulus	-4.8	6	6.2	30182	784	58	9	16	4.8	677|678|1958|2353|2354|3312|7538|7832|10628	ZFP36L1|ZFP36L2|EGR1|FOS|FOSB|HSPA8|ZFP36|BTG2|TXNIP	-3	RNA_Wilk_CD14+Monocytes_patient-C1B-severe_Down
GO Biological Processes	19	GO:0034250	positive regulation of amide metabolic process	19_GO:0048518 positive regulation of biological process	-4.7	15	8.3	30182	168	58	5	8.6	3.7	1938|5935|8663|23645|26986	EEF2|RBM3|EIF3C|PPP1R15A|PABPC1	-3	RNA_Wilk_CD14+Monocytes_patient-C1B-severe_Down
GO Biological Processes	19	GO:2000628	regulation of miRNA metabolic process	19_GO:0008152 metabolic process	-4.7	26	9.8	30182	81	58	4	6.9	3.3	1958|2353|3725|9314	EGR1|FOS|JUN|KLF4	-3	RNA_Wilk_CD14+Monocytes_patient-C1B-severe_Down
Reactome Gene Sets	6	R-HSA-72766	Translation		-4.7	11	7.3	30182	292	58	6	10	4	1915|1938|1975|8663|26986|51386	EEF1A1|EEF2|EIF4B|EIF3C|PABPC1|EIF3L	-2.9	RNA_Wilk_CD14+Monocytes_patient-C1B-severe_Down
GO Biological Processes	19	GO:0030217	T cell differentiation	19_GO:0002376 immune system process	-4.7	15	8.1	30182	173	58	5	8.6	3.7	677|678|920|972|1958	ZFP36L1|ZFP36L2|CD4|CD74|EGR1	-2.9	RNA_Wilk_CD14+Monocytes_patient-C1B-severe_Down
GO Biological Processes	19	GO:2000113	negative regulation of cellular macromolecule biosynthetic process	19_GO:0048519 negative regulation of biological process	-4.7	11	7.3	30182	293	58	6	10	4	677|678|5997|7538|7832|10399	ZFP36L1|ZFP36L2|RGS2|ZFP36|BTG2|RACK1	-2.9	RNA_Wilk_CD14+Monocytes_patient-C1B-severe_Down
Canonical Pathways	11	M235	PID TCR CALCIUM PATHWAY		-4.7	56	13	30182	28	58	3	5.2	2.9	2353|3725|3726	FOS|JUN|JUNB	-2.9	RNA_Wilk_CD14+Monocytes_patient-C1B-severe_Down
GO Biological Processes	19	GO:0050778	positive regulation of immune response	19_GO:0002376 immune system process	-4.7	6.8	6.4	30182	613	58	8	14	4.5	920|972|3109|3115|3119|3122|3123|4792	CD4|CD74|HLA-DMB|HLA-DPB1|HLA-DQB1|HLA-DRA|HLA-DRB1|NFKBIA	-2.9	RNA_Wilk_CD14+Monocytes_patient-C1B-severe_Down
GO Biological Processes	19	GO:0034249	negative regulation of amide metabolic process	19_GO:0048519 negative regulation of biological process	-4.7	11	7.3	30182	295	58	6	10	4	677|678|5997|7538|7832|10399	ZFP36L1|ZFP36L2|RGS2|ZFP36|BTG2|RACK1	-2.9	RNA_Wilk_CD14+Monocytes_patient-C1B-severe_Down
GO Biological Processes	19	GO:0071277	cellular response to calcium ion	19_GO:0050896 response to stimulus	-4.6	24	9.3	30182	88	58	4	6.9	3.3	2353|2354|3725|3726	FOS|FOSB|JUN|JUNB	-2.8	RNA_Wilk_CD14+Monocytes_patient-C1B-severe_Down
GO Biological Processes	19	GO:0140467	integrated stress response signaling	19_GO:0050896 response to stimulus	-4.6	52	12	30182	30	58	3	5.2	2.9	2353|3725|3726	FOS|JUN|JUNB	-2.8	RNA_Wilk_CD14+Monocytes_patient-C1B-severe_Down
KEGG Pathway	24	hsa05235	PD-L1 expression and PD-1 checkpoint pathway in cancer		-4.6	23	9.3	30182	89	58	4	6.9	3.3	920|2353|3725|4792	CD4|FOS|JUN|NFKBIA	-2.8	RNA_Wilk_CD14+Monocytes_patient-C1B-severe_Down
GO Biological Processes	19	GO:0071356	cellular response to tumor necrosis factor	19_GO:0050896 response to stimulus	-4.5	14	7.8	30182	185	58	5	8.6	3.7	677|678|2353|4792|7538	ZFP36L1|ZFP36L2|FOS|NFKBIA|ZFP36	-2.8	RNA_Wilk_CD14+Monocytes_patient-C1B-severe_Down
Canonical Pathways	11	M63	PID AVB3 OPN PATHWAY		-4.5	50	12	30182	31	58	3	5.2	2.9	2353|3725|4792	FOS|JUN|NFKBIA	-2.8	RNA_Wilk_CD14+Monocytes_patient-C1B-severe_Down
GO Biological Processes	19	GO:0071774	response to fibroblast growth factor	19_GO:0050896 response to stimulus	-4.5	23	9.1	30182	92	58	4	6.9	3.3	677|678|7538|9592	ZFP36L1|ZFP36L2|ZFP36|IER2	-2.8	RNA_Wilk_CD14+Monocytes_patient-C1B-severe_Down
GO Biological Processes	19	GO:0019883	antigen processing and presentation of endogenous antigen	19_GO:0002376 immune system process	-4.5	49	12	30182	32	58	3	5.2	2.9	972|3122|3123	CD74|HLA-DRA|HLA-DRB1	-2.8	RNA_Wilk_CD14+Monocytes_patient-C1B-severe_Down
KEGG Pathway	24	hsa05167	Kaposi sarcoma-associated herpesvirus infection		-4.4	13	7.6	30182	194	58	5	8.6	3.7	2353|3725|4792|7316|7538	FOS|JUN|NFKBIA|UBC|ZFP36	-2.7	RNA_Wilk_CD14+Monocytes_patient-C1B-severe_Down
Reactome Gene Sets	6	R-HSA-168142	Toll Like Receptor 10 (TLR10) Cascade		-4.4	21	8.9	30182	97	58	4	6.9	3.3	2353|3725|4792|7316	FOS|JUN|NFKBIA|UBC	-2.7	RNA_Wilk_CD14+Monocytes_patient-C1B-severe_Down
Reactome Gene Sets	6	R-HSA-168176	Toll Like Receptor 5 (TLR5) Cascade		-4.4	21	8.9	30182	97	58	4	6.9	3.3	2353|3725|4792|7316	FOS|JUN|NFKBIA|UBC	-2.7	RNA_Wilk_CD14+Monocytes_patient-C1B-severe_Down
Reactome Gene Sets	6	R-HSA-975871	MyD88 cascade initiated on plasma membrane		-4.4	21	8.9	30182	97	58	4	6.9	3.3	2353|3725|4792|7316	FOS|JUN|NFKBIA|UBC	-2.7	RNA_Wilk_CD14+Monocytes_patient-C1B-severe_Down
GO Biological Processes	19	GO:0032642	regulation of chemokine production	19_GO:0032501 multicellular organismal process	-4.4	21	8.8	30182	98	58	4	6.9	3.3	972|1958|2950|9314	CD74|EGR1|GSTP1|KLF4	-2.7	RNA_Wilk_CD14+Monocytes_patient-C1B-severe_Down
GO Biological Processes	19	GO:1901214	regulation of neuron death	19_GO:0050789 regulation of biological process	-4.4	9.5	6.8	30182	327	58	6	10	4	1958|2353|3725|4170|7832|10399	EGR1|FOS|JUN|MCL1|BTG2|RACK1	-2.7	RNA_Wilk_CD14+Monocytes_patient-C1B-severe_Down
Reactome Gene Sets	6	R-HSA-975138	TRAF6 mediated induction of NFkB and MAP kinases upon TLR7/8 or 9 activation		-4.3	20	8.6	30182	103	58	4	6.9	3.3	2353|3725|4792|7316	FOS|JUN|NFKBIA|UBC	-2.6	RNA_Wilk_CD14+Monocytes_patient-C1B-severe_Down
Reactome Gene Sets	6	R-HSA-975155	MyD88 dependent cascade initiated on endosome		-4.3	20	8.5	30182	104	58	4	6.9	3.3	2353|3725|4792|7316	FOS|JUN|NFKBIA|UBC	-2.6	RNA_Wilk_CD14+Monocytes_patient-C1B-severe_Down
KEGG Pathway	24	hsa04660	T cell receptor signaling pathway		-4.3	20	8.5	30182	104	58	4	6.9	3.3	920|2353|3725|4792	CD4|FOS|JUN|NFKBIA	-2.6	RNA_Wilk_CD14+Monocytes_patient-C1B-severe_Down
Reactome Gene Sets	6	R-HSA-168164	Toll Like Receptor 3 (TLR3) Cascade		-4.3	20	8.5	30182	105	58	4	6.9	3.3	2353|3725|4792|7316	FOS|JUN|NFKBIA|UBC	-2.6	RNA_Wilk_CD14+Monocytes_patient-C1B-severe_Down
Reactome Gene Sets	6	R-HSA-168181	Toll Like Receptor 7/8 (TLR7/8) Cascade		-4.3	20	8.5	30182	105	58	4	6.9	3.3	2353|3725|4792|7316	FOS|JUN|NFKBIA|UBC	-2.6	RNA_Wilk_CD14+Monocytes_patient-C1B-severe_Down
GO Biological Processes	19	GO:0001568	blood vessel development	19_GO:0032502 developmental process	-4.3	7.2	6.2	30182	506	58	7	12	4.3	677|1958|3725|3726|6303|7045|7127	ZFP36L1|EGR1|JUN|JUNB|SAT1|TGFBI|TNFAIP2	-2.6	RNA_Wilk_CD14+Monocytes_patient-C1B-severe_Down
GO Biological Processes	19	GO:0034612	response to tumor necrosis factor	19_GO:0050896 response to stimulus	-4.3	12	7.2	30182	211	58	5	8.6	3.7	677|678|2353|4792|7538	ZFP36L1|ZFP36L2|FOS|NFKBIA|ZFP36	-2.6	RNA_Wilk_CD14+Monocytes_patient-C1B-severe_Down
KEGG Pathway	24	hsa05170	Human immunodeficiency virus 1 infection		-4.3	12	7.2	30182	212	58	5	8.6	3.7	920|2353|3725|4792|8905	CD4|FOS|JUN|NFKBIA|AP1S2	-2.6	RNA_Wilk_CD14+Monocytes_patient-C1B-severe_Down
GO Biological Processes	19	GO:0061013	regulation of mRNA catabolic process	19_GO:0048519 negative regulation of biological process	-4.3	12	7.2	30182	212	58	5	8.6	3.7	677|678|7538|7832|26986	ZFP36L1|ZFP36L2|ZFP36|BTG2|PABPC1	-2.6	RNA_Wilk_CD14+Monocytes_patient-C1B-severe_Down
Reactome Gene Sets	6	R-HSA-6785807	Interleukin-4 and Interleukin-13 signaling		-4.2	19	8.3	30182	108	58	4	6.9	3.3	2353|3312|3726|4170	FOS|HSPA8|JUNB|MCL1	-2.6	RNA_Wilk_CD14+Monocytes_patient-C1B-severe_Down
Reactome Gene Sets	6	R-HSA-168138	Toll Like Receptor 9 (TLR9) Cascade		-4.2	19	8.3	30182	108	58	4	6.9	3.3	2353|3725|4792|7316	FOS|JUN|NFKBIA|UBC	-2.6	RNA_Wilk_CD14+Monocytes_patient-C1B-severe_Down
KEGG Pathway	24	hsa05417	Lipid and atherosclerosis		-4.2	12	7.2	30182	215	58	5	8.6	3.7	2353|3312|3326|3725|4792	FOS|HSPA8|HSP90AB1|JUN|NFKBIA	-2.6	RNA_Wilk_CD14+Monocytes_patient-C1B-severe_Down
Reactome Gene Sets	6	R-HSA-166166	MyD88-independent TLR4 cascade		-4.2	19	8.3	30182	110	58	4	6.9	3.3	2353|3725|4792|7316	FOS|JUN|NFKBIA|UBC	-2.5	RNA_Wilk_CD14+Monocytes_patient-C1B-severe_Down
Reactome Gene Sets	6	R-HSA-937061	TRIF(TICAM1)-mediated TLR4 signaling		-4.2	19	8.3	30182	110	58	4	6.9	3.3	2353|3725|4792|7316	FOS|JUN|NFKBIA|UBC	-2.5	RNA_Wilk_CD14+Monocytes_patient-C1B-severe_Down
Reactome Gene Sets	6	R-HSA-977225	Amyloid fiber formation		-4.2	19	8.2	30182	111	58	4	6.9	3.3	3021|4069|7045|7316	H3-3B|LYZ|TGFBI|UBC	-2.5	RNA_Wilk_CD14+Monocytes_patient-C1B-severe_Down
GO Biological Processes	19	GO:0032570	response to progesterone	19_GO:0050896 response to stimulus	-4.2	39	11	30182	40	58	3	5.2	2.9	2353|2354|10628	FOS|FOSB|TXNIP	-2.5	RNA_Wilk_CD14+Monocytes_patient-C1B-severe_Down
Reactome Gene Sets	6	R-HSA-2559582	Senescence-Associated Secretory Phenotype (SASP)		-4.2	19	8.2	30182	112	58	4	6.9	3.3	2353|3021|3725|7316	FOS|H3-3B|JUN|UBC	-2.5	RNA_Wilk_CD14+Monocytes_patient-C1B-severe_Down
Reactome Gene Sets	6	R-HSA-156827	L13a-mediated translational silencing of Ceruloplasmin expression		-4.2	19	8.2	30182	112	58	4	6.9	3.3	1975|8663|26986|51386	EIF4B|EIF3C|PABPC1|EIF3L	-2.5	RNA_Wilk_CD14+Monocytes_patient-C1B-severe_Down
KEGG Pathway	24	hsa04668	TNF signaling pathway		-4.2	19	8.2	30182	112	58	4	6.9	3.3	2353|3725|3726|4792	FOS|JUN|JUNB|NFKBIA	-2.5	RNA_Wilk_CD14+Monocytes_patient-C1B-severe_Down
GO Biological Processes	19	GO:0001944	vasculature development	19_GO:0032502 developmental process	-4.2	6.9	6	30182	526	58	7	12	4.3	677|1958|3725|3726|6303|7045|7127	ZFP36L1|EGR1|JUN|JUNB|SAT1|TGFBI|TNFAIP2	-2.5	RNA_Wilk_CD14+Monocytes_patient-C1B-severe_Down
GO Biological Processes	19	GO:0071396	cellular response to lipid	19_GO:0050896 response to stimulus	-4.2	6.9	6	30182	527	58	7	12	4.3	677|678|2353|2950|3312|4792|7538	ZFP36L1|ZFP36L2|FOS|GSTP1|HSPA8|NFKBIA|ZFP36	-2.5	RNA_Wilk_CD14+Monocytes_patient-C1B-severe_Down
Reactome Gene Sets	6	R-HSA-168188	Toll Like Receptor TLR6:TLR2 Cascade		-4.2	18	8.1	30182	113	58	4	6.9	3.3	2353|3725|4792|7316	FOS|JUN|NFKBIA|UBC	-2.5	RNA_Wilk_CD14+Monocytes_patient-C1B-severe_Down
Reactome Gene Sets	6	R-HSA-166058	MyD88:MAL(TIRAP) cascade initiated on plasma membrane		-4.2	18	8.1	30182	113	58	4	6.9	3.3	2353|3725|4792|7316	FOS|JUN|NFKBIA|UBC	-2.5	RNA_Wilk_CD14+Monocytes_patient-C1B-severe_Down
GO Biological Processes	19	GO:0006414	translational elongation	19_GO:0008152 metabolic process	-4.2	38	10	30182	41	58	3	5.2	2.9	1915|1938|10399	EEF1A1|EEF2|RACK1	-2.5	RNA_Wilk_CD14+Monocytes_patient-C1B-severe_Down
Reactome Gene Sets	6	R-HSA-8939211	ESR-mediated signaling		-4.2	12	7	30182	223	58	5	8.6	3.7	2353|2354|3021|3326|3725	FOS|FOSB|H3-3B|HSP90AB1|JUN	-2.5	RNA_Wilk_CD14+Monocytes_patient-C1B-severe_Down
GO Biological Processes	19	GO:0080135	regulation of cellular response to stress	19_GO:0050896 response to stimulus	-4.1	5.7	5.7	30182	726	58	8	14	4.5	972|1843|2950|4170|7178|9314|10399|23645	CD74|DUSP1|GSTP1|MCL1|TPT1|KLF4|RACK1|PPP1R15A	-2.5	RNA_Wilk_CD14+Monocytes_patient-C1B-severe_Down
Reactome Gene Sets	6	R-HSA-187037	Signaling by NTRK1 (TRKA)		-4.1	18	8.1	30182	115	58	4	6.9	3.3	1958|2353|2354|3726	EGR1|FOS|FOSB|JUNB	-2.5	RNA_Wilk_CD14+Monocytes_patient-C1B-severe_Down
GO Biological Processes	19	GO:0045622	regulation of T-helper cell differentiation	19_GO:0002376 immune system process	-4.1	37	10	30182	42	58	3	5.2	2.9	3122|3123|3726	HLA-DRA|HLA-DRB1|JUNB	-2.5	RNA_Wilk_CD14+Monocytes_patient-C1B-severe_Down
GO Biological Processes	19	GO:0006518	peptide metabolic process	19_GO:0008152 metabolic process	-4.1	6.8	5.9	30182	536	58	7	12	4.3	1915|1938|2950|8663|10209|10399|51386	EEF1A1|EEF2|GSTP1|EIF3C|EIF1|RACK1|EIF3L	-2.5	RNA_Wilk_CD14+Monocytes_patient-C1B-severe_Down
Reactome Gene Sets	6	R-HSA-168179	Toll Like Receptor TLR1:TLR2 Cascade		-4.1	18	8	30182	116	58	4	6.9	3.3	2353|3725|4792|7316	FOS|JUN|NFKBIA|UBC	-2.5	RNA_Wilk_CD14+Monocytes_patient-C1B-severe_Down
Reactome Gene Sets	6	R-HSA-181438	Toll Like Receptor 2 (TLR2) Cascade		-4.1	18	8	30182	116	58	4	6.9	3.3	2353|3725|4792|7316	FOS|JUN|NFKBIA|UBC	-2.5	RNA_Wilk_CD14+Monocytes_patient-C1B-severe_Down
GO Biological Processes	19	GO:0006412	translation	19_GO:0008152 metabolic process	-4.1	8.3	6.3	30182	375	58	6	10	4	1915|1938|8663|10209|10399|51386	EEF1A1|EEF2|EIF3C|EIF1|RACK1|EIF3L	-2.4	RNA_Wilk_CD14+Monocytes_patient-C1B-severe_Down
GO Biological Processes	19	GO:0000288	nuclear-transcribed mRNA catabolic process, deadenylation-dependent decay	19_GO:0048519 negative regulation of biological process	-4.1	35	10	30182	44	58	3	5.2	2.9	677|678|7538	ZFP36L1|ZFP36L2|ZFP36	-2.4	RNA_Wilk_CD14+Monocytes_patient-C1B-severe_Down
Reactome Gene Sets	6	R-HSA-72613	Eukaryotic Translation Initiation		-4.1	17	7.9	30182	120	58	4	6.9	3.3	1975|8663|26986|51386	EIF4B|EIF3C|PABPC1|EIF3L	-2.4	RNA_Wilk_CD14+Monocytes_patient-C1B-severe_Down
Reactome Gene Sets	6	R-HSA-72737	Cap-dependent Translation Initiation		-4.1	17	7.9	30182	120	58	4	6.9	3.3	1975|8663|26986|51386	EIF4B|EIF3C|PABPC1|EIF3L	-2.4	RNA_Wilk_CD14+Monocytes_patient-C1B-severe_Down
GO Biological Processes	19	GO:2001234	negative regulation of apoptotic signaling pathway	19_GO:0023052 signaling	-4.1	11	6.8	30182	233	58	5	8.6	3.7	293|972|2950|4170|7178	SLC25A6|CD74|GSTP1|MCL1|TPT1	-2.4	RNA_Wilk_CD14+Monocytes_patient-C1B-severe_Down
GO Biological Processes	19	GO:2001233	regulation of apoptotic signaling pathway	19_GO:0023052 signaling	-4	8.2	6.2	30182	381	58	6	10	4	293|972|2950|4170|7178|10399	SLC25A6|CD74|GSTP1|MCL1|TPT1|RACK1	-2.4	RNA_Wilk_CD14+Monocytes_patient-C1B-severe_Down
GO Biological Processes	19	GO:0050670	regulation of lymphocyte proliferation	19_GO:0002376 immune system process	-4	11	6.7	30182	239	58	5	8.6	3.7	972|3109|3113|3115|3123	CD74|HLA-DMB|HLA-DPA1|HLA-DPB1|HLA-DRB1	-2.4	RNA_Wilk_CD14+Monocytes_patient-C1B-severe_Down
Reactome Gene Sets	6	R-HSA-2559580	Oxidative Stress Induced Senescence		-4	17	7.7	30182	125	58	4	6.9	3.3	2353|3021|3725|7316	FOS|H3-3B|JUN|UBC	-2.4	RNA_Wilk_CD14+Monocytes_patient-C1B-severe_Down
GO Biological Processes	19	GO:0032944	regulation of mononuclear cell proliferation	19_GO:0050789 regulation of biological process	-4	11	6.7	30182	243	58	5	8.6	3.7	972|3109|3113|3115|3123	CD74|HLA-DMB|HLA-DPA1|HLA-DPB1|HLA-DRB1	-2.4	RNA_Wilk_CD14+Monocytes_patient-C1B-severe_Down
GO Biological Processes	19	GO:0046596	regulation of viral entry into host cell	19_GO:0016032 viral process	-4	33	9.6	30182	48	58	3	5.2	2.9	920|972|3123	CD4|CD74|HLA-DRB1	-2.4	RNA_Wilk_CD14+Monocytes_patient-C1B-severe_Down
Reactome Gene Sets	6	R-HSA-162909	Host Interactions of HIV factors		-3.9	16	7.5	30182	130	58	4	6.9	3.3	293|920|7316|8905	SLC25A6|CD4|UBC|AP1S2	-2.3	RNA_Wilk_CD14+Monocytes_patient-C1B-severe_Down
GO Biological Processes	19	GO:0043043	peptide biosynthetic process	19_GO:0008152 metabolic process	-3.9	7.7	6	30182	403	58	6	10	4	1915|1938|8663|10209|10399|51386	EEF1A1|EEF2|EIF3C|EIF1|RACK1|EIF3L	-2.3	RNA_Wilk_CD14+Monocytes_patient-C1B-severe_Down
GO Biological Processes	19	GO:0045321	leukocyte activation	19_GO:0002376 immune system process	-3.9	6.2	5.6	30182	584	58	7	12	4.3	677|678|920|972|1316|1958|3725	ZFP36L1|ZFP36L2|CD4|CD74|KLF6|EGR1|JUN	-2.3	RNA_Wilk_CD14+Monocytes_patient-C1B-severe_Down
Reactome Gene Sets	6	R-HSA-166520	Signaling by NTRKs		-3.9	16	7.4	30182	134	58	4	6.9	3.3	1958|2353|2354|3726	EGR1|FOS|FOSB|JUNB	-2.3	RNA_Wilk_CD14+Monocytes_patient-C1B-severe_Down
Reactome Gene Sets	6	R-HSA-2454202	Fc epsilon receptor (FCERI) signaling		-3.9	16	7.4	30182	134	58	4	6.9	3.3	2353|3725|4792|7316	FOS|JUN|NFKBIA|UBC	-2.3	RNA_Wilk_CD14+Monocytes_patient-C1B-severe_Down
GO Biological Processes	19	GO:0035914	skeletal muscle cell differentiation	19_GO:0032502 developmental process	-3.9	31	9.3	30182	51	58	3	5.2	2.9	1958|2353|7832	EGR1|FOS|BTG2	-2.3	RNA_Wilk_CD14+Monocytes_patient-C1B-severe_Down
KEGG Pathway	24	hsa04210	Apoptosis		-3.9	15	7.3	30182	136	58	4	6.9	3.3	2353|3725|4170|4792	FOS|JUN|MCL1|NFKBIA	-2.3	RNA_Wilk_CD14+Monocytes_patient-C1B-severe_Down
Canonical Pathways	11	M145	PID P53 DOWNSTREAM PATHWAY		-3.8	15	7.3	30182	137	58	4	6.9	3.3	1843|3725|4170|7832	DUSP1|JUN|MCL1|BTG2	-2.3	RNA_Wilk_CD14+Monocytes_patient-C1B-severe_Down
KEGG Pathway	24	hsa05135	Yersinia infection		-3.8	15	7.3	30182	137	58	4	6.9	3.3	920|2353|3725|4792	CD4|FOS|JUN|NFKBIA	-2.3	RNA_Wilk_CD14+Monocytes_patient-C1B-severe_Down
KEGG Pathway	24	hsa04915	Estrogen signaling pathway		-3.8	15	7.3	30182	138	58	4	6.9	3.3	2353|3312|3326|3725	FOS|HSPA8|HSP90AB1|JUN	-2.2	RNA_Wilk_CD14+Monocytes_patient-C1B-severe_Down
Canonical Pathways	11	M151	PID AR TF PATHWAY		-3.8	29	9.1	30182	53	58	3	5.2	2.9	1958|3725|10399	EGR1|JUN|RACK1	-2.2	RNA_Wilk_CD14+Monocytes_patient-C1B-severe_Down
GO Biological Processes	19	GO:0050684	regulation of mRNA processing	19_GO:0008152 metabolic process	-3.8	15	7.2	30182	139	58	4	6.9	3.3	677|3312|5935|9584	ZFP36L1|HSPA8|RBM3|RBM39	-2.2	RNA_Wilk_CD14+Monocytes_patient-C1B-severe_Down
GO Biological Processes	19	GO:0044403	biological process involved in symbiotic interaction	19_GO:0044419 biological process involved in interspecies interaction between organisms	-3.8	9.9	6.3	30182	264	58	5	8.6	3.7	920|1915|3312|3326|3725	CD4|EEF1A1|HSPA8|HSP90AB1|JUN	-2.2	RNA_Wilk_CD14+Monocytes_patient-C1B-severe_Down
GO Biological Processes	19	GO:0071385	cellular response to glucocorticoid stimulus	19_GO:0050896 response to stimulus	-3.8	29	9	30182	54	58	3	5.2	2.9	677|678|7538	ZFP36L1|ZFP36L2|ZFP36	-2.2	RNA_Wilk_CD14+Monocytes_patient-C1B-severe_Down
[truncated: 227 more rows]
