# Supplementary material for: Methylation patterns of the nasal epigenome of hospitalized SARS-CoV-2 positive patients reveal insights into molecular mechanisms of COVID-19
Source: Research Square preprint supplement (doi:10.21203/rs.3.rs-5026887/v1), 2024-10-22
Supplement: Supplementary file 4 [file d8c3d202ac8a715a4a56222c.xlsx]

## Sheet: SupplementalTable2A
chr	start	end	pvalue	qvalue	methylation difference	gene
chr1	1013751	1014250	2.47e-35	2.49e-31	-32.2699	ISG15
chr1	109307251	109307750	3.29e-19	2.08e-16	-26.5534	MYBPHL
chr1	117056751	117057250	4.43e-21	4.13e-18	-43.7445	TTF2
chr1	119896251	119896750	1e-21	1.07e-18	-18.2533	ADAM30
chr1	119896501	119897000	1.93e-20	1.59e-17	-17.834	ADAM30
chr1	13411001	13411500	1.85e-19	1.24e-16	-18.8781	PRAMEF20
chr1	151145251	151145750	3.54e-23	5.04e-20	-18.5298	SEMA6C
chr1	152839501	152840000	6.74e-20	4.96e-17	-29.7121	LCE6A
chr1	153675751	153676250	1.13e-21	1.19e-18	-11.7864	NPR1
chr1	155306501	155307000	2.78e-22	3.32e-19	-12.732	FDPS
chr1	156241251	156241750	1.68e-26	4.38e-23	-28.2461	BGLAP
chr1	156241501	156242000	1.34e-40	2.48e-36	-34.3388	BGLAP
chr1	156602001	156602500	1.67e-21	1.7e-18	-14.93	GPATCH4
chr1	159442251	159442750	2.29e-30	1.15e-26	-56.8542	OR10J1
chr1	159442501	159443000	2.29e-30	1.15e-26	-56.8542	OR10J1
chr1	159823251	159823750	2.13e-18	1.11e-15	-20.8878	SLAMF8
chr1	160796001	160796500	1.42e-18	7.71e-16	-27.4461	LY9
chr1	161117001	161117500	2.15e-31	1.25e-27	-11.0329	NIT1
chr1	162023001	162023500	6.44e-20	4.76e-17	-14.1133	OLFML2B
chr1	16207501	16208000	2.41e-37	3.08e-33	-22.318	ARHGEF19
chr1	165773251	165773750	1.27e-18	7.03e-16	-17.9568	TMCO1
chr1	21505001	21505500	1.05e-21	1.11e-18	-23.2668	ALPL
chr1	220876251	220876750	1.07e-30	5.64e-27	-14.2083	HLX
chr1	220876501	220877000	3.01e-36	3.42e-32	-18.5002	HLX
chr1	223133001	223133500	1.82e-19	1.22e-16	-13.5244	TLR5
chr1	223133251	223133750	2.8e-21	2.71e-18	-16.6543	TLR5
chr1	227559751	227560250	4.97e-19	3e-16	-26.7904	ZNF678
chr1	228163001	228163500	3.05e-29	1.28e-25	-11.6774	IBA57
chr1	236516001	236516500	1.71e-19	1.15e-16	-17.9333	LGALS8
chr1	236516251	236516750	3.37e-25	7.07e-22	-23.8713	LGALS8
chr1	24108501	24109000	2.44e-21	2.4e-18	-50.5742	MYOM3
chr1	247454501	247455000	1.26e-18	6.96e-16	-19.6172	OR2B11
chr1	247457001	247457500	1.61e-21	1.65e-18	-23.4084	OR2B11
chr1	248759001	248759500	1.1e-26	2.97e-23	-29.0543	LYPD8
chr1	248759251	248759750	3.91e-31	2.18e-27	-31.6736	LYPD8
chr1	2587501	2588000	1.94e-28	7.25e-25	-24.6353	FAM213B
chr1	27872001	27872500	1.06e-40	1.97e-36	-17.0759	THEMIS2
chr1	32109501	32110000	1.37e-18	7.5e-16	-12.7765	KPNA6
chr1	33379751	33380250	4.29e-24	7.35e-21	-24.777	PHC2
chr1	35568501	35569000	1.77e-20	1.47e-17	-40.7134	TFAP2E
chr1	35574751	35575250	8.14e-20	5.88e-17	-12.736	TFAP2E
chr1	36223001	36223500	2.49e-21	2.44e-18	-17.0338	THRAP3
chr1	36467501	36468000	1.08e-19	7.61e-17	-19.4415	MRPS15
chr1	42657001	42657500	6.65e-19	3.91e-16	-27.7067	PPIH
chr1	43304501	43305000	5.34e-23	7.33e-20	-28.4646	TIE1
chr1	45009501	45010000	3.34e-19	2.11e-16	-23.5622	HECTD3
chr1	50426501	50427000	1.36e-20	1.16e-17	-15.1259	DMRTA2
chr1	50426751	50427250	1.31e-19	9.02e-17	-12.0874	DMRTA2
chr1	50427001	50427500	1.36e-19	9.34e-17	-11.7574	DMRTA2
chr1	50427251	50427750	7.03e-32	4.39e-28	-12.8897	DMRTA2
chr1	53145501	53146000	2.14e-22	2.61e-19	-29.4981	SLC1A7
chr1	53145751	53146250	6.07e-27	1.73e-23	-25.9949	SLC1A7
chr1	62595251	62595750	1.13e-20	9.76e-18	-24.8136	ANGPTL3
chr1	6604001	6604500	2.06e-18	1.08e-15	-15.5726	KLHL21
chr1	7856251	7856750	2.25e-20	1.83e-17	-15.2999	UTS2
chr1	7856501	7857000	4.04e-36	4.54e-32	-22.1648	UTS2
chr1	8318751	8319250	3.18e-21	3.04e-18	-19.2062	SLC45A1
chr1	95234751	95235250	3.09e-20	2.45e-17	-11.2358	RWDD3
chr1	96718501	96719000	9.64e-22	1.03e-18	-16.1632	PTBP2
chr1	96718751	96719250	4.11e-19	2.53e-16	-11.2639	PTBP2
chr2	101993751	101994250	4.03e-19	2.49e-16	-15.8772	IL1R2
chr2	105399251	105399750	1.05e-26	2.87e-23	-14.1022	FHL2
chr2	105400001	105400500	1.12e-19	7.85e-17	-12.4495	FHL2
chr2	108718501	108719000	3.73e-58	2.68e-53	-17.2925	RANBP2
chr2	112539251	112539750	6.07e-20	4.51e-17	-30.3196	POLR1B
chr2	11467501	11468000	9.63e-31	5.11e-27	-18.6472	E2F6
chr2	127812001	127812500	7.78e-21	6.92e-18	-10.8165	WDR33
chr2	144524251	144524750	2.16e-36	2.52e-32	-24.3914	ZEB2
chr2	149331751	149332250	3.12e-19	1.98e-16	-12.5381	LYPD6
chr2	156432001	156432500	5.24e-25	1.06e-21	-45.8617	GPD2
chr2	201618501	201619000	5.12e-19	3.08e-16	-11.2894	C2CD6
chr2	203934501	203935000	3.21e-23	4.62e-20	-21.6777	ICOS
chr2	203934751	203935250	5.05e-20	3.83e-17	-16.0741	ICOS
chr2	20669251	20669750	2.1e-24	3.82e-21	-18.2955	GDF7
chr2	207710251	207710750	9.14e-27	2.51e-23	-15.4005	CCNYL1
chr2	219334251	219334750	3.58e-19	2.24e-16	-18.5665	RESP18
chr2	219516751	219517250	1.94e-25	4.23e-22	-36.1905	ASIC4
chr2	223838501	223839000	8.76e-19	5.01e-16	-10.9735	AP1S3
chr2	223838751	223839250	6.59e-22	7.28e-19	-11.5627	AP1S3
chr2	233710751	233711250	2.18e-18	1.13e-15	-32.994	UGT1A5
chr2	238158251	238158750	1.91e-41	3.83e-37	-41.4041	ERFE
chr2	27308251	27308750	1.64e-19	1.11e-16	-18.7392	UCN
chr2	30446501	30447000	1.92e-23	2.9e-20	-19.7559	LCLAT1
chr2	40509751	40510250	1.24e-26	3.31e-23	-16.1246	SLC8A1
chr2	40510001	40510500	2.29e-32	1.55e-28	-21.8505	SLC8A1
chr2	51027251	51027750	1.42e-22	1.8e-19	-16.0254	NRXN1
chr2	55268001	55268500	1.04e-21	1.1e-18	-11.0789	MTIF2
chr2	61021751	61022250	2.24e-22	2.72e-19	-19.552	PUS10
chr2	69891001	69891500	4.84e-19	2.93e-16	-28.2751	SNRNP27
chr2	86440251	86440750	3.98e-25	8.25e-22	-11.2597	KDM3A
chr2	88169751	88170250	6.82e-31	3.7e-27	-10.9428	THNSL2
chr2	952001	952500	7.4e-22	8.09e-19	-11.7996	SNTG2
chr2	9847751	9848250	1.57e-19	1.06e-16	-16.8727	TAF1B
chr2	99155751	99156250	1.06e-26	2.89e-23	-13.6812	LIPT1
chr3	101317751	101318250	7.07e-35	6.81e-31	-31.2573	IMPG2
chr3	10141251	10141750	8.87e-26	2.06e-22	-14.1602	VHL
chr3	101727251	101727750	6.89e-19	4.03e-16	-19.0136	CEP97
chr3	112842251	112842750	3.57e-28	1.25e-24	-16.6661	CD200R1L
chr3	130848251	130848750	2.07e-18	1.08e-15	-10.236	ATP2C1
chr3	139005751	139006250	2.32e-18	1.2e-15	-11.8973	MRPS22
chr3	14652501	14653000	6.13e-19	3.62e-16	-15.6805	CCDC174
chr3	149334501	149335000	1.09e-21	1.16e-18	-50.2339	TM4SF18
chr3	183555251	183555750	1.01e-19	7.13e-17	-14.2523	KLHL6
chr3	184132501	184133000	4.32e-19	2.65e-16	-20.7127	EIF2B5
chr3	185826251	185826750	9.1e-42	1.9e-37	-18.6423	IGF2BP2
chr3	186781751	186782250	9.08e-19	5.16e-16	-19.4306	EIF4A2
chr3	189168751	189169250	1.74e-21	1.76e-18	-24.7809	TPRG1
chr3	189169001	189169500	4.71e-24	7.98e-21	-16.6407	TPRG1
chr3	190446501	190447000	1.19e-22	1.53e-19	-22.1057	TMEM207
chr3	190510251	190510750	4.89e-22	5.53e-19	-27.6419	IL1RAP
chr3	190510501	190511000	9.46e-20	6.75e-17	-39.2415	IL1RAP
chr3	194370751	194371250	3.95e-22	4.56e-19	-18.2762	LRRC15
chr3	197556501	197557000	3.1e-24	5.44e-21	-13.6134	BDH1
chr3	197735751	197736250	2.24e-29	9.63e-26	-13.4239	RUBCN
chr3	31976751	31977250	1e-24	1.93e-21	-27.6835	OSBPL10
chr3	31982501	31983000	8.66e-23	1.14e-19	-24.4551	ZNF860
chr3	31982751	31983250	1.95e-20	1.61e-17	-19.6098	ZNF860
chr3	38493251	38493750	1.15e-20	9.92e-18	-27.8584	EXOG
chr3	40476501	40477000	2.06e-21	2.06e-18	-12.1374	ZNF619
chr3	45595251	45595750	8.06e-19	4.64e-16	-19.504	LIMD1
chr3	46741501	46742000	2.83e-19	1.82e-16	-12.2566	PRSS45
chr3	46975751	46976250	2.62e-23	3.83e-20	-11.1505	NBEAL2
chr3	5121501	5122000	7.64e-20	5.55e-17	-16.7617	ARL8B
chr3	52231251	52231750	3.04e-33	2.3e-29	-32.7219	ENSG00000173366
chr3	52443501	52444000	3.73e-21	3.53e-18	-19.9862	SEMA3G
chr3	52443751	52444250	3.29e-25	6.92e-22	-22.9774	SEMA3G
chr3	56684751	56685250	1.1e-22	1.42e-19	-11.7567	FAM208A
chr3	62376751	62377250	6.99e-23	9.38e-20	-10.7358	FEZF2
chr3	93970251	93970750	3.51e-20	2.75e-17	-17.9368	PROS1
chr3	93970501	93971000	1.58e-18	8.49e-16	-16.6667	PROS1
chr3	98728001	98728500	4.03e-19	2.49e-16	-21.1505	ST3GAL6
chr4	1012501	1013000	7.56e-35	7.23e-31	-12.856	FGFRL1
chr4	113978501	113979000	8.24e-25	1.61e-21	-16.208	ARSJ
chr4	113978751	113979250	3.31e-32	2.17e-28	-16.3268	ARSJ
chr4	119318501	119319000	5.51e-24	9.21e-21	-45.0538	FABP2
chr4	119318751	119319250	2.45e-30	1.22e-26	-37.9394	FABP2
chr4	120065751	120066250	8.02e-19	4.62e-16	-14.3157	MAD2L1
chr4	125313001	125313500	4.3e-23	6.03e-20	-36.5079	FAT4
chr4	158170751	158171250	5.46e-22	6.13e-19	-13.9785	FAM198B
chr4	1718251	1718750	2.42e-19	1.58e-16	-22.2681	TMEM129
chr4	185138001	185138500	3.65e-22	4.24e-19	-17.3639	SLC25A4
chr4	1851501	1852000	3e-19	1.91e-16	-14.3564	LETM1
chr4	188109501	188110000	5.55e-21	5.07e-18	-21.0294	TRIML2
chr4	40054001	40054500	4.73e-26	1.15e-22	-17.4963	N4BP2
chr4	87524751	87525250	6.48e-22	7.17e-19	-36.4147	SPARCL1
chr5	1007501	1008000	8e-28	2.64e-24	-22.2794	NKD2
chr5	1007751	1008250	2.07e-21	2.06e-18	-22.4094	NKD2
chr5	139198501	139199000	2.7e-45	8.02e-41	-23.1482	SIL1
chr5	141247001	141247500	3.88e-22	4.48e-19	-10.56	PCDHB15
chr5	141492501	141493000	5.15e-33	3.75e-29	-15.8634	PCDHGC5
chr5	141492751	141493250	1.35e-30	6.99e-27	-25.6447	PCDHGC5
chr5	14873001	14873500	7.74e-40	1.32e-35	-27.6275	ANKH
chr5	14873251	14873750	1.73e-27	5.43e-24	-24.3417	ANKH
chr5	149346501	149347000	4.34e-26	1.06e-22	-28.0326	GRPEL2
chr5	159916501	159917000	4.66e-24	7.91e-21	-12.9086	ADRA1B
chr5	173330001	173330500	3.91e-22	4.51e-19	-11.1723	STC2
chr5	179551501	179552000	4e-22	4.61e-19	-10.6263	RUFY1
chr5	179905501	179906000	4.4e-20	3.38e-17	-18.7362	TBC1D9B
chr5	180352001	180352500	3.94e-19	2.44e-16	-15.5405	GFPT2
chr5	180654251	180654750	1.04e-19	7.37e-17	-13.3783	FLT4
chr5	34933751	34934250	9.42e-21	8.25e-18	-27.1451	DNAJC21
chr5	3597501	3598000	3.19e-25	6.72e-22	-15.7462	IRX1
chr5	442001	442500	2.67e-21	2.61e-18	-19.6771	EXOC3
chr5	5141251	5141750	1.69e-18	9.02e-16	-16.7571	ADAMTS16
chr5	55992001	55992500	4.72e-24	8e-21	-20.4744	IL6ST
chr5	55992251	55992750	5.44e-20	4.09e-17	-17.9531	IL6ST
chr5	61327751	61328250	7.74e-19	4.47e-16	-27.4331	ZSWIM6
chr5	65564001	65564500	2.31e-36	2.66e-32	-30.7983	PPWD1
chr5	72318751	72319250	3.94e-20	3.05e-17	-17.1474	MRPS27
chr5	770251	770750	9.43e-22	1.01e-18	-13.8366	ZDHHC11B
chr5	79069751	79070250	6.14e-40	1.07e-35	-11.7781	BHMT2
chr6	10417251	10417750	2.37e-34	2.15e-30	-17.0771	TFAP2A
chr6	10417501	10418000	4.87e-31	2.68e-27	-14.5283	TFAP2A
chr6	110476501	110477000	3.2e-26	8.01e-23	-14.3615	SLC22A16
chr6	110476751	110477250	4.76e-21	4.41e-18	-10.5345	SLC22A16
chr6	110819751	110820250	2.02e-18	1.06e-15	-50.1553	CDK19
chr6	110959751	110960250	1.28e-20	1.09e-17	-13.9836	GTF3C6
chr6	111259751	111260250	3.6e-27	1.07e-23	-18.2525	MFSD4B
chr6	132589001	132589500	8.11e-28	2.67e-24	-24.0588	TAAR5
chr6	139134501	139135000	1.01e-46	3.42e-42	-18.7609	HECA
chr6	153048751	153049250	2.53e-25	5.41e-22	-39.78	RGS17
chr6	155313001	155313500	9.71e-25	1.88e-21	-24.6364	TFB1M
chr6	158822751	158823250	2.87e-19	1.84e-16	-22.6289	EZR
chr6	16233501	16234000	2.27e-28	8.34e-25	-14.818	GMPR
chr6	166863001	166863500	1.23e-18	6.8e-16	-16.7933	RPS6KA2
chr6	168000751	168001250	1.39e-18	7.58e-16	-13.8184	KIF25
chr6	17989501	17990000	2.26e-18	1.17e-15	-10.8025	KIF13A
chr6	2844251	2844750	7.52e-22	8.2e-19	-19.5502	SERPINB1
chr6	29680251	29680750	8.49e-27	2.35e-23	-20.0247	ZFP57
chr6	29680501	29681000	9.41e-40	1.59e-35	-19.3997	ZFP57
chr6	29680751	29681250	3.13e-92	1.16e-86	-27.5112	ZFP57
chr6	29681001	29681500	4.26e-95	1.88e-89	-25.0385	ZFP57
chr6	31661001	31661500	1.96e-31	1.14e-27	-27.8964	C6orf47
chr6	33010751	33011250	3.38e-20	2.65e-17	-13.4048	HLA-DOA
chr6	33011001	33011500	2.5e-19	1.62e-16	-23.9381	HLA-DOA
chr6	33080751	33081250	1.58e-19	1.07e-16	-20.0795	HLA-DPA1
chr6	35140251	35140750	4.13e-21	3.88e-18	-17.5639	TCP11
chr6	39312501	39313000	3.95e-24	6.81e-21	-30.9536	KCNK17
chr6	39793251	39793750	1.7e-18	9.08e-16	-18.0507	DAAM2
chr6	41745001	41745500	1.4e-18	7.66e-16	-25.1929	PGC
chr6	43576751	43577250	2.47e-22	2.98e-19	-13.5499	POLH
chr6	43577751	43578250	3.46e-42	7.66e-38	-21.6447	POLH
chr6	46688501	46689000	2.26e-22	2.74e-19	-10.533	TDRD6
chr6	47045501	47046000	5.39e-27	1.55e-23	-18.5773	ADGRF1
chr6	57316001	57316500	5.37e-21	4.92e-18	-17.086	PRIM2
chr6	6000001	6000500	3.11e-19	1.98e-16	-15.4454	NRN1
chr6	6000251	6000750	1.02e-20	8.89e-18	-36.2039	NRN1
chr6	6588751	6589250	3.05e-19	1.94e-16	-29.6157	LY86
chr6	68639501	68640000	1.31e-18	7.2e-16	-24.1891	ADGRB3
chr6	69863001	69863500	1.31e-18	7.19e-16	-15.7496	COL19A1
chr6	72619251	72619750	3.94e-20	3.05e-17	-14.1345	KCNQ5
chr6	73454501	73455000	2.44e-37	3.12e-33	-23.2253	MB21D1
chr6	73454751	73455250	5.38e-24	9.02e-21	-20.8136	MB21D1
chr7	102970251	102970750	3.71e-22	4.3e-19	-31.2144	NFE4
chr7	106113001	106113500	7.25e-21	6.5e-18	-17.5326	SYPL1
chr7	123926251	123926750	5.45e-22	6.11e-19	-17.3269	SPAM1
chr7	129055751	129056250	3.53e-20	2.76e-17	-11.923	TNPO3
chr7	129056001	129056500	1.56e-33	1.22e-29	-14.9774	TNPO3
chr7	1461251	1461750	6.27e-23	8.5e-20	-23.5491	MICALL2
chr7	149719001	149719500	3.55e-24	6.16e-21	-20.6192	KRBA1
chr7	1504751	1505250	5.68e-45	1.64e-40	-18.2974	INTS1
chr7	150990501	150991000	9.06e-19	5.15e-16	-19.1679	NOS3
chr7	155294001	155294500	4.33e-20	3.33e-17	-28.6558	INSIG1
chr7	156080751	156081250	1.42e-18	7.73e-16	-29.6073	SHH
chr7	156123501	156124000	1.32e-19	9.12e-17	-10.2502	SHH
chr7	156251001	156251500	2.85e-19	1.83e-16	-13.1336	SHH
chr7	156346501	156347000	2.76e-20	2.21e-17	-12.6807	SHH
chr7	156469751	156470250	2.39e-24	4.29e-21	-18.7326	SHH
chr7	2558251	2558750	2.08e-18	1.09e-15	-16.5144	IQCE
chr7	2843251	2843750	2.07e-20	1.7e-17	-21.0941	GNA12
chr7	42913751	42914250	1.13e-19	7.89e-17	-27.5004	C7orf25
chr7	44040751	44041250	9.02e-24	1.45e-20	-10.091	DBNL
chr7	4862001	4862500	1.78e-25	3.9e-22	-18.2828	PAPOLB
chr7	4883751	4884250	4.49e-20	3.44e-17	-19.6353	RADIL
chr7	50302501	50303000	9.82e-19	5.54e-16	-14.0592	IKZF1
chr7	55949751	55950250	4.63e-20	3.54e-17	-11.0781	MRPS17
chr7	72824251	72824750	3.94e-20	3.06e-17	-14.5331	TYW1B
chr7	72824501	72825000	9.09e-23	1.19e-19	-17.8829	TYW1B
chr7	73843001	73843500	4.92e-24	8.31e-21	-16.0313	METTL27
chr7	76543251	76543750	7.78e-21	6.92e-18	-47.4506	SPDYE16
chr7	79449751	79450250	1.38e-20	1.17e-17	-29.2893	MAGI2
chr7	830501	831000	1.4e-19	9.61e-17	-19.5118	SUN1
chr7	97001751	97002250	1.04e-21	1.11e-18	-19.9053	DLX6
chr8	102241001	102241500	1.18e-21	1.24e-18	-13.8309	RRM2B
chr8	10731501	10732000	1.58e-18	8.49e-16	-10.3079	SOX7
chr8	123183001	123183500	1.48e-24	2.76e-21	-14.5483	FAM83A
chr8	144269501	144270000	7.35e-20	5.36e-17	-36.5043	SCX
chr8	144526251	144526750	2.19e-31	1.27e-27	-15.6984	LRRC24
chr8	144756001	144756500	1.11e-19	7.78e-17	-10.5958	ZNF251
chr8	1828251	1828750	1.82e-18	9.64e-16	-12.2128	ARHGEF10
chr8	1828501	1829000	3.78e-25	7.86e-22	-11.4744	ARHGEF10
chr8	30142251	30142750	8.4e-22	9.07e-19	-44.1697	MBOAT4
chr8	56074751	56075250	1.56e-18	8.41e-16	-15.289	RPS20
chr8	71841251	71841750	1.01e-19	7.16e-17	-11.4097	MSC
chr8	71841751	71842250	4.22e-52	2.12e-47	-17.2074	MSC
chr8	74353001	74353500	1.49e-19	1.02e-16	-12.1578	GDAP1
chr8	74353251	74353750	1.46e-20	1.23e-17	-11.8826	GDAP1
chr8	94638251	94638750	8.6e-28	2.82e-24	-13.6005	ESRP1
chr9	113302751	113303250	2.72e-31	1.56e-27	-18.589	RNF183
chr9	113303001	113303500	8.86e-34	7.3e-30	-19.7673	RNF183
chr9	118251	118750	3.65e-20	2.85e-17	-14.3587	FOXD4
chr9	120932751	120933250	1.08e-20	9.35e-18	-16.7525	TRAF1
chr9	122532001	122532500	1.7e-18	9.08e-16	-34.8893	OR1N1
chr9	124505251	124505750	4.07e-23	5.75e-20	-14.9917	NR5A1
chr9	128948501	128949000	6.83e-27	1.93e-23	-19.7273	NUP188
chr9	129752001	129752500	4.3e-19	2.64e-16	-15.2571	PTGES
chr9	129824751	129825250	5.48e-20	4.11e-17	-12.8756	TOR1A
chr9	129825001	129825500	4.25e-21	3.98e-18	-10.5125	TOR1A
chr9	132671251	132671750	3.32e-20	2.61e-17	-12.0053	DDX31
chr9	133211251	133211750	1.53e-18	8.28e-16	-15.6429	OBP2B
chr9	136549501	136550000	3.57e-19	2.23e-16	-20.2428	NOTCH1
chr9	136661501	136662000	6.82e-21	6.14e-18	-25.5887	EGFL7
chr9	137228001	137228500	3.71e-19	2.31e-16	-15.2193	RNF224
chr9	137228251	137228750	1.76e-18	9.37e-16	-15.948	RNF224
chr9	33079751	33080250	9.16e-20	6.56e-17	-18.4362	SMU1
chr9	35906251	35906750	3.11e-19	1.97e-16	-18.6902	HRCT1
chr9	37467501	37468000	2.4e-23	3.53e-20	-12.4738	ZBTB5
chr9	93954001	93954500	8.61e-23	1.14e-19	-12.7011	BARX1
chr9	97307251	97307750	4.76e-31	2.62e-27	-18.5306	CCDC180
chr9	97699251	97699750	4.23e-23	5.94e-20	-23.5257	XPA
chr9	97699501	97700000	3.64e-21	3.45e-18	-23.3452	XPA
chr9	97848501	97849000	4.42e-41	8.37e-37	-11.1045	FOXE1
chr10	100008251	100008750	1.18e-25	2.66e-22	-21.8516	DNMBP
chr10	100464751	100465250	9.49e-25	1.84e-21	-52.8652	WNT8B
chr10	101822751	101823250	1.61e-20	1.35e-17	-10.8427	MGEA5
chr10	1022251	1022750	2.83e-19	1.82e-16	-10.0713	IDI2
chr10	102240501	102241000	1.11e-18	6.21e-16	-12.9481	PITX3
chr10	102433001	102433500	8.73e-45	2.48e-40	-26.6582	CUEDC2
chr10	102433251	102433750	2.4e-28	8.78e-25	-28.735	CUEDC2
chr10	122456001	122456500	8.93e-22	9.6e-19	-29.6302	ARMS2
chr10	126391001	126391500	8.72e-20	6.27e-17	-23.0007	ADAM12
chr10	126904001	126904500	1.47e-23	2.26e-20	-19.7608	DOCK1
chr10	129464751	129465250	9.23e-19	5.24e-16	-11.4307	MGMT
chr10	133624001	133624500	1.05e-19	7.43e-17	-31.6288	FRG2B
chr10	15042001	15042500	1.55e-22	1.94e-19	-12.1624	OLAH
chr10	15042251	15042750	1.24e-25	2.79e-22	-17.4565	OLAH
chr10	20894251	20894750	1.36e-22	1.73e-19	-26.4294	NEBL
chr10	28281501	28282000	5.89e-20	4.39e-17	-21.8872	MPP7
chr10	62266001	62266500	5.16e-20	3.9e-17	-31.0731	RTKN2
chr10	67696001	67696500	1.55e-19	1.05e-16	-37.1753	CTNNA3
chr10	69267751	69268250	8.04e-24	1.3e-20	-35.8059	HK1
chr10	70378251	70378750	1.09e-20	9.44e-18	-26.3694	LRRC20
chr10	7700001	7700500	6.21e-28	2.09e-24	-13.4722	ITIH2
chr10	92691001	92691500	3.38e-23	4.84e-20	-12.5849	HHEX
chr10	93076501	93077000	8.68e-19	4.96e-16	-24.221	CYP26A1
chr10	96984001	96984500	5.24e-19	3.15e-16	-11.9339	LCOR
chr10	98411001	98411500	1.24e-18	6.86e-16	-15.3113	PYROXD2
chr10	98411251	98411750	8.11e-19	4.67e-16	-12.038	PYROXD2
chr11	111920751	111921250	7.2e-25	1.43e-21	-76.6284	C11orf52
chr11	118305751	118306250	3.51e-22	4.09e-19	-14.6828	CD3E
chr11	1225751	1226250	1.64e-19	1.11e-16	-23.4066	MUC5B
chr11	123059501	123060000	1.05e-23	1.66e-20	-19.0732	HSPA8
chr11	123064251	123064750	1.38e-18	7.52e-16	-11.5543	HSPA8
chr11	15114751	15115250	1.38e-29	6.15e-26	-11.4279	INSC
chr11	1694251	1694750	3.39e-34	2.99e-30	-19.2037	KRTAP5-6
chr11	18530501	18531000	1.35e-18	7.39e-16	-10.2314	TSG101
chr11	297751	298250	1.03e-19	7.27e-17	-14.5725	IFITM5
chr11	3379501	3380000	1.42e-20	1.2e-17	-32.3958	ZNF195
chr11	3807251	3807750	1.94e-23	2.93e-20	-10.614	PGAP2
chr11	5619251	5619750	6.55e-19	3.85e-16	-18.2658	TRIM34
chr11	60972251	60972750	1.57e-18	8.45e-16	-14.6249	CD6
chr11	61203001	61203500	2.59e-22	3.11e-19	-18.517	PGA3
chr11	613751	614250	7.6e-26	1.79e-22	-25.4253	IRF7
chr11	615001	615500	1.07e-37	1.43e-33	-17.7567	IRF7
chr11	65385501	65386000	3.54e-20	2.77e-17	-21.0357	FRMD8
chr11	65390251	65390750	1.68e-21	1.7e-18	-16.2874	FRMD8
chr11	65790751	65791250	1.52e-21	1.56e-18	-13.1379	OVOL1
chr11	67446251	67446750	1.04e-19	7.37e-17	-13.9279	CORO1B
chr11	67633501	67634000	7.32e-20	5.35e-17	-13.9045	NUDT8
chr11	697751	698250	6.83e-21	6.15e-18	-12.377	DEAF1
chr11	698001	698500	1.47e-21	1.51e-18	-26.3215	DEAF1
chr11	701251	701750	1.24e-33	1.01e-29	-21.6903	EPS8L2
chr11	701501	702000	7.41e-22	8.09e-19	-13.6206	EPS8L2
chr11	71567501	71568000	2.15e-20	1.76e-17	-28.381	KRTAP5-10
chr11	7255251	7255750	1.39e-22	1.75e-19	-49.5438	SYT9
chr11	7255501	7256000	1.3e-22	1.66e-19	-36.8982	SYT9
chr11	73953251	73953750	2.78e-23	4.04e-20	-20.8499	DNAJB13
chr11	77591501	77592000	3.44e-19	2.16e-16	-11.1696	AQP11
chr11	95786251	95786750	1.66e-21	1.69e-18	-27.1919	FAM76B
chr11	95786501	95787000	3.03e-20	2.4e-17	-16.1979	FAM76B
chr12	109099501	109100000	2.23e-23	3.31e-20	-20.8902	UNG
chr12	109099751	109100250	1.84e-21	1.86e-18	-15.9846	UNG
chr12	116876751	116877250	1.69e-23	2.57e-20	-19.3098	HRK
chr12	122172251	122172750	9.11e-23	1.19e-19	-14.1358	IL31
chr12	122985251	122985750	3.32e-19	2.1e-16	-20.4806	ABCB9
chr12	12893001	12893500	3.43e-19	2.15e-16	-19.9238	GPRC5A
chr12	132956751	132957250	1.26e-25	2.82e-22	-10.639	ZNF605
chr12	1631001	1631500	2.18e-19	1.44e-16	-18.0374	WNT5B
chr12	27709501	27710000	5.53e-21	5.06e-18	-14.5742	MRPS35
chr12	27711501	27712000	1.5e-23	2.31e-20	-12.7909	MRPS35
chr12	49111501	49112000	1.41e-19	9.69e-17	-10.5215	LMBR1L
chr12	5044501	5045000	9.3e-21	8.15e-18	-13.6998	KCNA5
chr12	52951501	52952000	1.03e-18	5.81e-16	-11.8378	KRT18
chr12	53442751	53443250	7.22e-20	5.28e-17	-14.2435	PRR13
chr12	56487001	56487500	9.51e-23	1.24e-19	-22.4197	GLS2
chr12	56525501	56526000	8.39e-24	1.35e-20	-10.9973	RBMS2
chr12	62263751	62264250	9.19e-27	2.53e-23	-16.9048	USP15
chr12	6307001	6307500	3.53e-26	8.74e-23	-15.8773	PLEKHG6
chr12	95469501	95470000	1.16e-18	6.47e-16	-27.4802	METAP2
chr13	113653251	113653750	2.25e-18	1.16e-15	-19.5013	ATP4B
chr13	114134501	114135000	1.17e-19	8.18e-17	-22.3373	RASA3
chr13	28720001	28720500	9.79e-27	2.68e-23	-18.5856	SLC46A3
chr13	37063501	37064000	1.75e-21	1.77e-18	-38.7918	SUPT20H
chr13	41058501	41059000	1.59e-18	8.55e-16	-13.8801	WBP4
chr13	41058751	41059250	1.18e-23	1.85e-20	-14.7166	WBP4
chr13	50013751	50014250	4.01e-19	2.48e-16	-12.742	KCNRG
chr13	79409501	79410000	5.28e-21	4.84e-18	-21.1485	RBM26
chr13	98750001	98750500	4.57e-23	6.38e-20	-15.4832	SLC15A1
chr13	98750251	98750750	1.96e-24	3.58e-21	-16.0815	SLC15A1
chr14	100377251	100377750	2.09e-26	5.36e-23	-13.4577	WARS
chr14	100377501	100378000	6e-20	4.46e-17	-13.8852	WARS
chr14	104693501	104694000	2.3e-19	1.51e-16	-11.5353	INF2
chr14	104796001	104796500	2.22e-25	4.78e-22	-18.3775	AKT1
chr14	105025001	105025500	3.25e-19	2.05e-16	-17.7271	CDCA4
chr14	20470501	20471000	7.2e-22	7.88e-19	-12.3601	PNP
chr14	21289001	21289500	8.42e-21	7.44e-18	-15.6752	RPGRIP1
chr14	23552001	23552500	5.11e-20	3.87e-17	-15.2348	ZFHX2
chr14	35402001	35402500	1.49e-19	1.02e-16	-15.8033	NFKBIA
chr14	49584001	49584500	1.02e-23	1.63e-20	-18.9109	RPS29
chr14	49584251	49584750	3.19e-22	3.75e-19	-21.8407	RPS29
chr14	63314251	63314750	6.04e-19	3.58e-16	-14.2056	GPHB5
chr14	75436001	75436500	1.21e-35	1.26e-31	-42.6157	JDP2
chr14	75436251	75436750	1.21e-35	1.26e-31	-42.6157	JDP2
chr14	75579001	75579500	7.56e-19	4.37e-16	-16.0786	FLVCR2
chr14	77025751	77026250	6.6e-20	4.87e-17	-13.6364	IRF2BPL
chr14	87991001	87991500	5.64e-29	2.28e-25	-19.4988	GALC
chr14	87991251	87991750	1.62e-32	1.12e-28	-30.6325	GALC
chr14	90811751	90812250	9.03e-20	6.47e-17	-20.2403	TTC7B
chr14	93976751	93977250	4.28e-19	2.62e-16	-28.846	ASB2
chr14	94107501	94108000	3.42e-26	8.5e-23	-14.467	IFI27
chr14	94107751	94108250	6.11e-28	2.06e-24	-19.1028	IFI27
chr15	101253251	101253750	1.09e-19	7.67e-17	-11.0831	CHSY1
chr15	23647001	23647500	1.72e-33	1.34e-29	-25.1129	MAGEL2
chr15	32027501	32028000	2.47e-38	3.55e-34	-19.8197	CHRNA7
chr15	32027751	32028250	6.24e-40	1.08e-35	-28.4977	CHRNA7
chr15	45433501	45434000	1.76e-20	1.46e-17	-12.7346	C15orf48
chr15	45526251	45526750	7.62e-20	5.54e-17	-51.8902	SLC30A4
chr15	63123001	63123500	1.94e-20	1.6e-17	-16.256	LACTB
chr15	66496751	66497250	3.78e-19	2.35e-16	-14.9552	SNAPC5
chr15	68430751	68431250	1.26e-26	3.36e-23	-13.9561	ITGA11
chr15	74201501	74202000	1.49e-19	1.02e-16	-38.6459	STRA6
chr15	74432251	74432750	1.97e-19	1.31e-16	-23.6194	SEMA7A
chr15	82643001	82643500	1.07e-25	2.43e-22	-12.6929	CPEB1
chr15	89815251	89815750	9.23e-26	2.14e-22	-22.0617	ANPEP
chr15	90232501	90233000	8.27e-19	4.75e-16	-22.6701	GDPGP1
chr15	90879751	90880250	6.79e-27	1.92e-23	-20.693	FES
chr15	90880001	90880500	1.31e-25	2.92e-22	-22.8381	FES
chr16	1081501	1082000	8.09e-21	7.17e-18	-16.3652	SSTR5
chr16	11587251	11587750	9.32e-23	1.22e-19	-13.9442	LITAF
chr16	1489251	1489750	3.16e-21	3.03e-18	-15.2046	PTX4
chr16	1677501	1678000	7.7e-24	1.25e-20	-10.071	JPT2
chr16	1774251	1774750	2.91e-19	1.86e-16	-14.117	EME2
chr16	1822001	1822500	1.38e-20	1.17e-17	-14.4716	FAHD1
chr16	19414501	19415000	1.54e-18	8.34e-16	-14.9446	TMC5
chr16	2015501	2016000	2.1e-18	1.09e-15	-11.1969	NPW
chr16	23186251	23186750	2.81e-25	5.96e-22	-13.2455	SCNN1G
chr16	2533501	2534000	2.14e-24	3.88e-21	-18.0612	CEMP1
chr16	2778501	2779000	2.1e-22	2.56e-19	-17.2443	ELOB
chr16	28747001	28747500	2.07e-28	7.69e-25	-22.3031	NPIPB9
chr16	28747251	28747750	9.97e-24	1.59e-20	-25.65	NPIPB9
chr16	28949751	28950250	5.55e-33	4.03e-29	-13.6357	NFATC2IP
chr16	28983501	28984000	2.29e-19	1.5e-16	-10.9262	LAT
chr16	28983751	28984250	1.31e-23	2.04e-20	-16.537	LAT
chr16	2967501	2968000	1.39e-18	7.61e-16	-13.3219	PAQR4
chr16	4243251	4243750	4.32e-22	4.94e-19	-23.007	SRL
chr16	4473501	4474000	9.76e-25	1.88e-21	-16.2349	NMRAL1
chr16	4481001	4481500	1.36e-20	1.16e-17	-12.7545	NMRAL1
chr16	54291001	54291500	9.95e-29	3.87e-25	-12.6831	IRX3
chr16	56958251	56958750	1.51e-19	1.03e-16	-11.5957	CETP
chr16	57089001	57089500	7.29e-20	5.33e-17	-18.3945	CPNE2
chr16	66876501	66877000	2.08e-18	1.09e-15	-23.8462	PDP2
chr16	66935751	66936250	1.33e-30	6.92e-27	-18.5878	CES2
chr16	67885751	67886250	8.22e-26	1.92e-22	-12.7674	NRN1L
chr16	67886001	67886500	1.89e-19	1.26e-16	-10.5175	NRN1L
chr16	68738251	68738750	1.46e-24	2.73e-21	-17.5267	CDH1
chr16	70526001	70526500	1.08e-18	6.06e-16	-12.7812	SF3B3
chr16	85901251	85901750	1.99e-18	1.04e-15	-14.8335	IRF8
chr16	85901501	85902000	2.29e-24	4.13e-21	-20.2519	IRF8
chr16	8593001	8593500	2.54e-20	2.05e-17	-26.7566	TMEM114
chr17	15562501	15563000	2.1e-18	1.1e-15	-21.2478	TVP23C
chr17	1646751	1647250	2.93e-21	2.83e-18	-16.5469	SCARF1
chr17	18317501	18318000	1.23e-18	6.82e-16	-13.6237	SMCR8
chr17	18857251	18857750	5.74e-29	2.32e-25	-10.3411	PRPSAP2
chr17	19720001	19720500	4.56e-19	2.78e-16	-16.8789	SLC47A2
chr17	19744251	19744750	2.86e-21	2.76e-18	-10.7533	ALDH3A1
chr17	28405251	28405750	6.87e-22	7.56e-19	-25.0762	SLC46A1
chr17	30825001	30825500	1.54e-33	1.21e-29	-13.8057	CRLF3
chr17	3131501	3132000	1.74e-18	9.28e-16	-25.7678	OR1G1
chr17	32140751	32141250	9.44e-26	2.18e-22	-10.8155	RHOT1
chr17	3438501	3439000	2.32e-35	2.35e-31	-48.6834	OR1E2
chr17	35189751	35190250	7.29e-30	3.42e-26	-16.2662	SLC35G3
chr17	36063001	36063500	6.37e-23	8.61e-20	-60.6476	CCL18
chr17	40965001	40965500	5.61e-23	7.67e-20	-10.1392	KRT39
chr17	42109251	42109750	9.73e-21	8.49e-18	-10.933	DHX58
chr17	44118751	44119250	3.46e-19	2.17e-16	-20.0683	HDAC5
chr17	44560001	44560500	5.74e-20	4.29e-17	-26.2621	FZD2
chr17	47249251	47249750	5.97e-19	3.54e-16	-42.4358	ITGB3
chr17	47249501	47250000	5.97e-19	3.54e-16	-42.4358	ITGB3
chr17	47732751	47733250	7.04e-26	1.67e-22	-17.3854	TBX21
chr17	47848251	47848750	2.5e-23	3.67e-20	-14.6946	SP6
chr17	48551001	48551500	5.46e-25	1.1e-21	-16.289	HOXB3
chr17	48555751	48556250	1.25e-22	1.6e-19	-13.8979	HOXB3
chr17	4937501	4938000	2.65e-27	8.1e-24	-12.3326	RNF167
chr17	4937751	4938250	7.35e-26	1.74e-22	-11.264	RNF167
chr17	58330751	58331250	3.85e-20	2.99e-17	-15.8169	TSPOAP1
chr17	61395251	61395750	1.58e-19	1.07e-16	-23.4007	TBX2
chr17	65053251	65053750	4.93e-19	2.98e-16	-11.639	GNA13
chr17	6996251	6996750	1.08e-57	7.45e-53	-24.9116	ALOX12
chr17	7118501	7119000	2.18e-24	3.95e-21	-26.2358	ASGR2
chr17	75180501	75181000	4.32e-19	2.65e-16	-21.9108	SUMO2
chr17	76352251	76352750	4.72e-20	3.59e-17	-10.2641	PRPSAP1
chr17	79023501	79024000	1.26e-19	8.71e-17	-14.0039	C1QTNF1
chr17	81889751	81890250	1.06e-19	7.45e-17	-12.3127	ALYREF
chr17	8246751	8247250	2.02e-19	1.34e-16	-21.2828	CTC1
chr17	977251	977750	5.24e-19	3.15e-16	-15.7011	NXN
chr17	9792251	9792750	4.57e-21	4.25e-18	-14.9352	DHRS7C
chr18	24393001	24393500	1.7e-19	1.14e-16	-14.3995	OSBPL1A
chr18	24393251	24393750	7.19e-24	1.18e-20	-10.0662	OSBPL1A
chr18	31590001	31590500	3.46e-20	2.71e-17	-25.9226	TTR
chr18	31590751	31591250	4.28e-20	3.29e-17	-25.7196	TTR
chr18	32465501	32466000	3.47e-19	2.18e-16	-18.0111	GAREM1
chr18	3251501	3252000	1.37e-19	9.44e-17	-15.9564	MYL12A
chr18	49814751	49815250	7.7e-22	8.38e-19	-15.3482	ACAA2
chr18	63658501	63659000	3.45e-26	8.58e-23	-25.3744	SERPINB3
chr18	70201001	70201500	1.34e-19	9.21e-17	-13.1539	RTTN
chr18	70201251	70201750	1.75e-18	9.32e-16	-11.902	RTTN
chr19	11596501	11597000	2.78e-20	2.22e-17	-17.3864	ZNF627
chr19	11742501	11743000	6.18e-21	5.59e-18	-12.6364	ZNF823
chr19	11769501	11770000	9.27e-37	1.12e-32	-28.877	ZNF441
chr19	11769751	11770250	1.31e-35	1.36e-31	-25.4449	ZNF441
chr19	1209501	1210000	1.02e-18	5.73e-16	-14.9338	STK11
chr19	1209751	1210250	1.59e-24	2.95e-21	-30.0524	STK11
chr19	12555501	12556000	3.91e-30	1.91e-26	-19.966	ZNF564
chr19	14032501	14033000	2.61e-28	9.47e-25	-30.5462	IL27RA
chr19	14527251	14527750	1.1e-19	7.75e-17	-16.5716	TECR
chr19	1454751	1455250	4.49e-23	6.28e-20	-14.9718	APC2
chr19	15614251	15614750	1.97e-23	2.96e-20	-31.6236	CYP4F8
chr19	1594501	1595000	3.4e-21	3.24e-18	-10.1986	MBD3
chr19	17870251	17870750	4.43e-24	7.55e-21	-25.279	SLC5A5
chr19	17870501	17871000	1.99e-18	1.05e-15	-17.9028	SLC5A5
chr19	19820501	19821000	1.68e-18	9.01e-16	-13.5364	ZNF506
chr19	21363251	21363750	1.07e-22	1.39e-19	-26.7503	ZNF738
chr19	2294001	2294500	1.67e-18	8.93e-16	-12.9376	LINGO3
chr19	2740251	2740750	1.17e-24	2.22e-21	-12.4872	SLC39A3
chr19	33306251	33306750	9e-21	7.92e-18	-25.9089	CEBPA
chr19	33306501	33307000	4.24e-25	8.75e-22	-32.8935	CEBPA
chr19	343251	343750	9.12e-24	1.46e-20	-12.1185	MIER2
chr19	35642001	35642500	1.95e-18	1.03e-15	-19.3021	ETV2
chr19	35859501	35860000	2.02e-18	1.06e-15	-12.9014	KIRREL2
chr19	35859751	35860250	1.82e-18	9.63e-16	-12.8252	KIRREL2
chr19	3717001	3717500	6.02e-21	5.46e-18	-19.2077	TJP3
chr19	38790751	38791250	2.47e-23	3.63e-20	-17.5737	LGALS7B
chr19	38812751	38813250	1.43e-21	1.47e-18	-16.1615	LGALS4
chr19	3989501	3990000	2.59e-27	7.92e-24	-33.7111	EEF2
chr19	40390751	40391250	2.95e-21	2.84e-18	-13.7537	HIPK4
chr19	40391001	40391500	3.06e-26	7.68e-23	-13.3342	HIPK4
chr19	41089251	41089750	3.06e-24	5.36e-21	-52.0929	CYP2A13
chr19	41380251	41380750	1.33e-21	1.38e-18	-14.1623	ENSG00000255730
chr19	43501751	43502250	8.31e-27	2.31e-23	-11.7914	PHLDB3
chr19	43502001	43502500	1.42e-19	9.7e-17	-11.8082	PHLDB3
chr19	44217251	44217750	3.69e-23	5.25e-20	-43.4987	ZNF227
chr19	45040751	45041250	6.75e-19	3.96e-16	-13.4872	CLASRP
chr19	45159001	45159500	4.45e-20	3.41e-17	-40.1055	NKPD1
chr19	45248251	45248750	1.89e-22	2.33e-19	-10.0752	MARK4
chr19	45466001	45466500	6.37e-20	4.72e-17	-13.472	FOSB
chr19	48648751	48649250	2.03e-18	1.07e-15	-16.664	CA11
chr19	48871251	48871750	2.93e-26	7.39e-23	-12.333	PPP1R15A
chr19	49019751	49020250	2.63e-44	7.25e-40	-19.6488	LHB
chr19	49071501	49072000	1.12e-31	6.79e-28	-25.177	KCNA7
chr19	49490001	49490500	1.2e-21	1.26e-18	-17.0101	RPL13A
chr19	50369501	50370000	8.84e-48	3.38e-43	-35.147	NAPSA
chr19	50415251	50415750	7.53e-34	6.33e-30	-13.8445	ENSG00000142539
chr19	50415501	50416000	1.11e-35	1.17e-31	-21.0168	ENSG00000142539
chr19	53880251	53880750	8.06e-19	4.64e-16	-46.1117	PRKCG
chr19	54531501	54532000	1.48e-20	1.25e-17	-17.4787	KIR3DX1
chr19	54814001	54814500	1.36e-27	4.33e-24	-15.2741	KIR3DL1
chr19	54814251	54814750	3.23e-29	1.35e-25	-17.4843	KIR3DL1
chr19	55038001	55038500	2.65e-24	4.7e-21	-27.473	GP6
chr19	55479501	55480000	2.07e-18	1.08e-15	-12.3207	ZNF628
chr19	56224251	56224750	2.23e-20	1.81e-17	-15.4995	ZSCAN5A
chr19	57524001	57524500	1.87e-22	2.3e-19	-20.7769	ZNF549
chr19	58521251	58521750	6.71e-23	9.03e-20	-12.9476	ZBTB45
chr19	632251	632750	6.57e-26	1.57e-22	-18.8172	POLRMT
chr19	638751	639250	6.44e-25	1.29e-21	-16.009	FGF22
chr19	9113751	9114250	9.54e-22	1.02e-18	-15.5135	OR7G1
chr19	9114001	9114500	2.5e-32	1.67e-28	-20.8282	OR7G1
chr20	23086251	23086750	5.06e-49	2.15e-44	-17.9518	CD93
chr20	31721501	31722000	3.07e-28	1.09e-24	-26.4479	BCL2L1
chr20	31721751	31722250	2.55e-20	2.06e-17	-21.4353	BCL2L1
chr20	34303501	34304000	1.25e-19	8.65e-17	-11.2261	AHCY
chr20	35767501	35768000	1.04e-19	7.33e-17	-18.7961	PHF20
chr20	38032001	38032500	1.96e-19	1.3e-16	-18.8984	TTI1
chr20	43595251	43595750	1.53e-18	8.26e-16	-10.8349	IFT52
chr20	44405751	44406250	4.44e-20	3.4e-17	-11.5922	HNF4A
chr20	44406001	44406500	2.07e-21	2.06e-18	-13.2416	HNF4A
chr20	44524751	44525250	4.48e-19	2.73e-16	-13.1735	SERINC3
chr20	45789001	45789500	8.75e-22	9.43e-19	-24.3459	WFDC3
chr20	46411001	46411500	2.45e-56	1.48e-51	-22.2646	ELMO2
chr20	4821001	4821500	2.34e-21	2.3e-18	-16.2937	RASSF2
chr20	49983251	49983750	1.09e-18	6.11e-16	-28.9831	SNAI1
chr20	5128251	5128750	2.12e-27	6.58e-24	-26.4014	CDS2
chr20	57395751	57396250	4.19e-23	5.89e-20	-12.8199	RBM38
chr20	58982001	58982500	2.15e-20	1.75e-17	-13.6782	NELFCD
chr20	62430751	62431250	2.1e-29	9.11e-26	-22.9052	RBBP8NL
chr20	62431001	62431500	4.57e-22	5.2e-19	-16.7474	RBBP8NL
chr20	916501	917000	7.02e-22	7.72e-19	-29.0264	ANGPT4
chr21	15068001	15068500	8.82e-22	9.49e-19	-18.3008	NRIP1
chr21	43776751	43777250	1.13e-61	1.05e-56	-54.9269	CSTB
chr21	43777001	43777500	4.89e-20	3.71e-17	-11.3851	CSTB
chr21	44343001	44343500	2.05e-18	1.07e-15	-15.5759	C21orf2
chr21	44343251	44343750	3.1e-20	2.45e-17	-17.0211	C21orf2
chr21	44923751	44924250	4.37e-40	7.77e-36	-19.843	ITGB2
chr21	44924001	44924500	8.03e-38	1.08e-33	-24.3444	ITGB2
chr22	17361001	17361500	3.25e-19	2.06e-16	-17.7476	CECR2
chr22	17775001	17775500	3.22e-21	3.08e-18	-15.0848	BID
chr22	19719251	19719750	2.1e-18	1.09e-15	-18.6153	GP1BB
chr22	19722001	19722500	5.3e-22	5.95e-19	-23.7282	GP1BB
chr22	19722251	19722750	8.38e-22	9.06e-19	-15.8987	GP1BB
chr22	20147001	20147500	6.89e-20	5.07e-17	-49.2497	CCDC188
chr22	23578001	23578500	1.21e-19	8.42e-17	-21.0098	IGLL1
chr22	25742001	25742500	5.41e-20	4.07e-17	-12.9369	MYO18B
chr22	27802751	27803250	2.08e-21	2.07e-18	-12.1788	MN1
chr22	29716501	29717000	4.16e-23	5.86e-20	-27.2787	CABP7
chr22	32203501	32204000	5.31e-35	5.2e-31	-28.3177	RFPL2
chr22	32203751	32204250	1.98e-39	3.23e-35	-51.1649	RFPL2
chr22	32204001	32204500	1.38e-26	3.66e-23	-25.8315	RFPL2
chr22	32204251	32204750	4.14e-27	1.22e-23	-19.686	RFPL2
chr22	32204501	32205000	5.09e-20	3.85e-17	-19.3325	RFPL2
chr22	32204751	32205250	1.75e-30	8.97e-27	-17.3395	RFPL2
chr22	32205001	32205500	2.53e-21	2.47e-18	-18.0698	RFPL2
chr22	36774251	36774750	1.05e-18	5.91e-16	-15.5924	IFT27
chr22	36774501	36775000	2.3e-24	4.14e-21	-19.1334	IFT27
chr22	37283501	37284000	4.71e-27	1.37e-23	-32.077	CYTH4
chr22	37283751	37284250	8.39e-20	6.05e-17	-26.4621	CYTH4
chr22	37484251	37484750	1.85e-19	1.24e-16	-10.1712	MFNG
chr22	37485751	37486250	3.01e-22	3.56e-19	-11.746	MFNG
chr22	37642751	37643250	1.94e-18	1.02e-15	-20.3763	SH3BP1
chr22	37682001	37682500	1.53e-27	4.86e-24	-25.7187	NOL12
chr22	37850001	37850500	4.8e-39	7.46e-35	-26.859	EIF3L
chr22	43144001	43144500	2.41e-21	2.36e-18	-11.9429	MCAT
chr22	50482251	50482750	2.89e-25	6.11e-22	-24.1971	ADM2
